# Supplementary material for: An NKX2-1/ERK/WNT feedback loop modulates gastric identity and response to targeted therapy in lung adenocarcinoma
Source: eLife. 2021 Apr 6;10:e66788. doi: 10.7554/eLife.66788 (PMC8102067; doi:10.7554/eLife.66788)
Supplement: Supplementary file 1. [file elife-66788-supp1.xlsx]

## Sheet: summary
Supplementary File 1 - Bulk RNAseq-DESeq2-Analysis
contrast	summary	count	percent
BP_C.vs.BPN_C	up-regulated	11	0.05
BP_C.vs.BPN_C	down-regulated	639	2.69
BP_C.vs.BPN_C	outliers	55	0.23
BP_C.vs.BPN_C	low counts <	0	0
BP_C.vs.BP_TX	up-regulated	216	0.91
BP_C.vs.BP_TX	down-regulated	117	0.49
BP_C.vs.BP_TX	outliers	55	0.23
BP_C.vs.BP_TX	low counts <	0	0
BPN_C.vs.BPN_TX	up-regulated	245	1.03
BPN_C.vs.BPN_TX	down-regulated	161	0.68
BPN_C.vs.BPN_TX	outliers	55	0.23
BPN_C.vs.BPN_TX	low counts <	0	0
BP_TX.vs.BPN_TX	up-regulated	241	1.02
BP_TX.vs.BPN_TX	down-regulated	861	3.63
BP_TX.vs.BPN_TX	outliers	55	0.23
BP_TX.vs.BPN_TX	low counts <	0	0

## Sheet: BP_C.vs.BPN_C
id	gene_name	biotype	chromosome	start	description	baseMean	log2FoldChange	lfcSE	stat	pvalue	padj
ENSMUSG00000024032	Tff1	protein_coding	17	31161396	trefoil factor 1	38018.6	-10.6192	0.274781	-35.0069	1.76847e-268	1.67368e-263
ENSMUSG00000030050	Gkn1	protein_coding	6	87345650	gastrokine 1	13868.8	-10.9591	0.358232	-27.8008	4.24413e-170	2.00832e-165
ENSMUSG00000024029	Tff3	protein_coding	17	31125306	trefoil factor 3, intestinal	5366.69	-11.1226	0.366401	-27.6272	5.25242e-168	1.65696e-163
ENSMUSG00000026417	Pigr	protein_coding	1	130826684	polymeric immunoglobulin receptor	58221.5	-8.65698	0.281358	-27.2144	4.38689e-163	1.03794e-158
ENSMUSG00000074183	Gsta1	protein_coding	9	78230656	glutathione S-transferase, alpha 1 (Ya)	5181.05	-8.62273	0.289254	-26.3531	4.72941e-153	7.45985e-149
ENSMUSG00000023122	Sult1c2	protein_coding	17	53829637	sulfotransferase family, cytosolic, 1C, member 2	4731.89	-10.4837	0.385087	-24.6276	6.40439e-134	6.73457e-130
ENSMUSG00000050097	Ces2b	protein_coding	8	104831572	carboxyesterase 2B	582.701	-7.93428	0.288822	-24.0088	2.24929e-127	1.93521e-123
ENSMUSG00000061825	Ces2c	protein_coding	8	104847068	carboxylesterase 2C	1217.5	-9.98578	0.380099	-23.6407	1.47294e-123	1.16166e-119
ENSMUSG00000068452	Duox2	protein_coding	2	122279247	dual oxidase 2	3479.9	-7.97944	0.302351	-23.0839	6.72518e-118	4.89593e-114
ENSMUSG00000041737	Tmem45b	protein_coding	9	31426196	transmembrane protein 45b	1233.01	-8.21339	0.314837	-22.9115	3.56561e-116	2.41035e-112
ENSMUSG00000039084	Chad	protein_coding	11	94565047	chondroadherin	1219.37	-7.08176	0.265931	-22.8697	9.30568e-116	5.87126e-112
ENSMUSG00000035429	Ptprh	protein_coding	7	4548612	protein tyrosine phosphatase, receptor type, H	921.435	-8.46541	0.328965	-22.6936	5.18228e-114	3.06532e-110
ENSMUSG00000029260	Ugt2b34	protein_coding	5	86889767	UDP glucuronosyltransferase 2 family, polypeptide B34	3025.45	-9.80832	0.390814	-22.5384	1.74456e-112	9.71204e-109
ENSMUSG00000019775	Rgs17	protein_coding	10	5825663	regulator of G-protein signaling 17	952.486	-6.87523	0.264394	-22.2215	2.12887e-109	1.0604e-105
ENSMUSG00000045991	Onecut2	protein_coding	18	64340364	one cut domain, family member 2	2504.4	-7.01665	0.271747	-22.1406	1.28388e-108	6.07533e-105
ENSMUSG00000031877	Ces2g	protein_coding	8	104961718	carboxylesterase 2G	2420.06	-9.70104	0.400211	-21.7411	8.38688e-105	3.77969e-101
ENSMUSG00000111709	Gm3776	protein_coding	9	78257129	predicted gene 3776	920.831	-7.84566	0.321099	-21.3194	7.49439e-101	3.08378e-97
ENSMUSG00000037106	Fer1l6	protein_coding	15	58510048	fer-1-like 6 (C. elegans)	1058.34	-7.05922	0.284944	-21.2646	2.41425e-100	9.52018e-97
ENSMUSG00000027800	Tm4sf1	protein_coding	3	57285611	transmembrane 4 superfamily member 1	6206.86	-6.8262	0.278541	-20.9168	3.76221e-97	1.36945e-93
ENSMUSG00000028488	Sh3gl2	protein_coding	4	85205126	SH3-domain GRB2-like 2	400.557	-5.29547	0.207485	-20.7026	3.28258e-95	1.15061e-91
ENSMUSG00000013643	Lypd8	protein_coding	11	58379043	LY6/PLAUR domain containing 8	5832.31	-9.95105	0.434409	-20.6051	2.46962e-94	8.34732e-91
ENSMUSG00000054342	Kcnn4	protein_coding	7	24370263	potassium intermediate/small conductance calcium-activated channel, subfamily N, member 4	1006.92	-6.36387	0.263093	-20.3877	2.14865e-92	6.77827e-89
ENSMUSG00000026062	Slc9a2	protein_coding	1	40680574	solute carrier family 9 (sodium/hydrogen exchanger), member 2	1691.26	-5.69327	0.230612	-20.3514	4.51547e-92	1.37853e-88
ENSMUSG00000032899	Styk1	protein_coding	6	131299142	serine/threonine/tyrosine kinase 1	687.962	-4.9909	0.199101	-20.0446	2.25169e-89	6.65938e-86
ENSMUSG00000006538	Ihh	protein_coding	1	74945315	Indian hedgehog	1774.8	-8.12222	0.361126	-19.7223	1.38875e-86	3.75518e-83
ENSMUSG00000020151	Ptprr	protein_coding	10	116018213	protein tyrosine phosphatase, receptor type, R	458.56	-7.85015	0.348072	-19.6803	3.18357e-86	8.36926e-83
ENSMUSG00000037145	2210407C18Rik	protein_coding	11	58608204	RIKEN cDNA 2210407C18 gene	10385.5	-9.40257	0.427762	-19.6431	6.62048e-86	1.69341e-82
ENSMUSG00000039193	Nlrc4	protein_coding	17	74426295	NLR family, CARD domain containing 4	477.592	-4.31268	0.169698	-19.521	7.28124e-85	1.72274e-81
ENSMUSG00000022938	Fam3b	protein_coding	16	97471050	family with sequence similarity 3, member B	812.677	-8.57715	0.388555	-19.5008	1.0805e-84	2.49412e-81
ENSMUSG00000037788	Vopp1	protein_coding	6	57727807	vesicular, overexpressed in cancer, prosurvival protein 1	1799.76	-4.46769	0.179987	-19.2664	1.02934e-82	2.21401e-79
ENSMUSG00000048992	Prss32	protein_coding	17	23843855	protease, serine 32	1171.1	-8.17583	0.374446	-19.1639	7.4126e-82	1.52506e-78
ENSMUSG00000039217	Il18	protein_coding	9	50554827	interleukin 18	1275.54	-5.35391	0.227312	-19.1539	8.97888e-82	1.808e-78
ENSMUSG00000044726	Erich5	protein_coding	15	34453312	glutamate rich 5	690.824	-8.82208	0.413563	-18.9139	8.76718e-80	1.69332e-76
ENSMUSG00000030048	Gkn3	protein_coding	6	87383256	gastrokine 3	3851.87	-9.84487	0.469613	-18.8344	3.94861e-79	7.18646e-76
ENSMUSG00000015627	Gata5	protein_coding	2	180325133	GATA binding protein 5	1641.11	-7.45879	0.342957	-18.8326	4.08011e-79	7.28569e-76
ENSMUSG00000031608	Galnt7	protein_coding	8	57523828	UDP-N-acetyl-alpha-D-galactosamine: polypeptide N-acetylgalactosaminyltransferase 7	4200.53	-4.26059	0.182076	-17.9079	1.02375e-71	1.51387e-68
ENSMUSG00000098207	Arl14	protein_coding	3	69222419	ADP-ribosylation factor-like 14	485.595	-5.87412	0.273531	-17.8193	5.00749e-71	7.07326e-68
ENSMUSG00000050199	Lgr4	protein_coding	2	109917647	leucine-rich repeat-containing G protein-coupled receptor 4	1048.44	-5.69779	0.265142	-17.718	3.04441e-70	4.2371e-67
ENSMUSG00000029322	Plac8	protein_coding	5	100553725	placenta-specific 8	9827.43	-7.47747	0.366787	-17.66	8.52001e-70	1.13568e-66
ENSMUSG00000073408	Dpcr1	protein_coding	17	35635752	diffuse panbronchiolitis critical region 1 (human)	16162.7	-7.7996	0.387021	-17.5691	4.25193e-69	5.51237e-66
ENSMUSG00000053964	Lgals4	protein_coding	7	28833854	lectin, galactose binding, soluble 4	14640.5	-6.76954	0.330646	-17.4493	3.48394e-68	4.45568e-65
ENSMUSG00000049858	Suox	protein_coding	10	128669894	sulfite oxidase	1649.23	-3.10609	0.120731	-17.4444	3.79479e-68	4.78852e-65
ENSMUSG00000024899	Papss2	protein_coding	19	32620005	3'-phosphoadenosine 5'-phosphosulfate synthase 2	919.151	-6.36685	0.31571	-16.9993	8.30932e-65	9.95436e-62
ENSMUSG00000004552	Ctse	protein_coding	1	131638306	cathepsin E	12143.1	-5.70147	0.27708	-16.9679	1.41872e-64	1.67835e-61
ENSMUSG00000020019	Ntn4	protein_coding	10	93640681	netrin 4	812.428	-4.19617	0.191574	-16.6837	1.72224e-62	1.91756e-59
ENSMUSG00000030909	Anks4b	protein_coding	7	120173858	ankyrin repeat and sterile alpha motif domain containing 4B	347.326	-5.5511	0.273139	-16.6622	2.46845e-62	2.71644e-59
ENSMUSG00000027801	Tm4sf4	protein_coding	3	57425314	transmembrane 4 superfamily member 4	1426.3	-9.51742	0.518159	-16.4379	1.02484e-60	1.11484e-57
ENSMUSG00000022941	Ripply3	protein_coding	16	94328420	ripply transcriptional repressor 3	487.152	-5.9943	0.3042	-16.4178	1.4265e-60	1.53414e-57
ENSMUSG00000027225	Duoxa2	protein_coding	2	122298900	dual oxidase maturation factor 2	1485.78	-9.76309	0.535361	-16.3686	3.20697e-60	3.41019e-57
ENSMUSG00000004633	Chn2	protein_coding	6	54039554	chimerin 2	637.024	-5.65427	0.285542	-16.2998	9.9016e-60	1.01857e-56
ENSMUSG00000049608	Gpr55	protein_coding	1	85938318	G protein-coupled receptor 55	419.753	-8.12837	0.437928	-16.2775	1.42564e-59	1.45078e-56
ENSMUSG00000034107	Ano7	protein_coding	1	93373930	anoctamin 7	1419.25	-7.54695	0.406534	-16.1043	2.37877e-58	2.36976e-55
ENSMUSG00000028019	Pdgfc	protein_coding	3	81036416	platelet-derived growth factor, C polypeptide	496.447	-5.13862	0.260428	-15.8916	7.2449e-57	6.85657e-54
ENSMUSG00000041372	B4galnt3	protein_coding	6	120203073	beta-1,4-N-acetyl-galactosaminyl transferase 3	348.467	-4.42715	0.216597	-15.8227	2.17129e-56	2.03456e-53
ENSMUSG00000029086	Prom1	protein_coding	5	43993620	prominin 1	3481.08	-6.53739	0.351796	-15.7404	7.99851e-56	7.27864e-53
ENSMUSG00000024730	Ms4a8a	protein_coding	19	11067471	membrane-spanning 4-domains, subfamily A, member 8A	766.851	-5.67872	0.299219	-15.6364	4.11012e-55	3.60168e-52
ENSMUSG00000030650	Tmc5	protein_coding	7	118597297	transmembrane channel-like gene family 5	1081.78	-4.7844	0.244286	-15.4917	3.94829e-54	3.27777e-51
ENSMUSG00000044734	Serpinb1a	protein_coding	13	32842092	serine (or cysteine) peptidase inhibitor, clade B, member 1a	1145.09	-5.19725	0.271336	-15.4688	5.63366e-54	4.63625e-51
ENSMUSG00000026579	F5	protein_coding	1	164151838	coagulation factor V	963.004	-6.78383	0.378214	-15.2925	8.57992e-53	6.9402e-50
ENSMUSG00000035775	Krt20	protein_coding	11	99428403	keratin 20	4535.99	-8.49476	0.491139	-15.26	1.41321e-52	1.13344e-49
ENSMUSG00000020581	Agr2	protein_coding	12	35992907	anterior gradient 2	2562.33	-7.02834	0.395852	-15.2288	2.27774e-52	1.81147e-49
ENSMUSG00000056313	1810011O10Rik	protein_coding	8	24437180	RIKEN cDNA 1810011O10 gene	1943.45	-5.75379	0.312289	-15.2224	2.51125e-52	1.98054e-49
ENSMUSG00000001497	Pax9	protein_coding	12	56691767	paired box 9	498.473	-7.07343	0.399072	-15.2189	2.64926e-52	2.07212e-49
ENSMUSG00000025085	Ablim1	protein_coding	19	57032733	actin-binding LIM protein 1	5007.55	-3.52789	0.166437	-15.1882	4.232e-52	3.28292e-49
ENSMUSG00000067206	Lrrc66	protein_coding	5	73606642	leucine rich repeat containing 66	198.682	-7.43018	0.424804	-15.1368	9.25819e-52	7.00956e-49
ENSMUSG00000043461	Sptssb	protein_coding	3	69819542	serine palmitoyltransferase, small subunit B	2986.92	-6.97095	0.397049	-15.0383	4.11931e-51	3.04572e-48
ENSMUSG00000037157	Il22ra1	protein_coding	4	135728172	interleukin 22 receptor, alpha 1	260.742	-4.62026	0.241777	-14.9736	1.09304e-50	8.01902e-48
ENSMUSG00000031551	Ido1	protein_coding	8	24584136	indoleamine 2,3-dioxygenase 1	1647.45	-9.01677	0.536331	-14.9474	1.61841e-50	1.1782e-47
ENSMUSG00000025432	Avil	protein_coding	10	127000709	advillin	1136.71	-8.11431	0.477084	-14.9121	2.75042e-50	1.98702e-47
ENSMUSG00000095026	Gm3336	protein_coding	8	70718543	predicted gene 3336	461.259	-5.64528	0.311536	-14.9109	2.80023e-50	2.00768e-47
ENSMUSG00000025091	Pnliprp2	protein_coding	19	58759723	pancreatic lipase-related protein 2	714.626	-10.019	0.606111	-14.8802	4.43435e-50	3.15539e-47
ENSMUSG00000031635	Anxa10	protein_coding	8	62057042	annexin A10	4796.34	-7.55252	0.440378	-14.8793	4.49068e-50	3.17162e-47
ENSMUSG00000032226	Gcnt3	protein_coding	9	70031496	glucosaminyl (N-acetyl) transferase 3, mucin type	2607.84	-6.90522	0.399083	-14.797	1.5319e-49	1.06602e-46
ENSMUSG00000051076	Vtcn1	protein_coding	3	100825459	V-set domain containing T cell activation inhibitor 1	1161.42	-5.95502	0.339352	-14.6014	2.75154e-48	1.887e-45
ENSMUSG00000078439	Smim24	protein_coding	10	81393051	small integral membrane protein 24	684.208	-4.69469	0.254186	-14.5354	7.22828e-48	4.92147e-45
ENSMUSG00000061808	Ttr	protein_coding	18	20665250	transthyretin	1873.91	-8.43775	0.513328	-14.4893	1.41648e-47	9.5075e-45
ENSMUSG00000031613	Hpgd	protein_coding	8	56294585	hydroxyprostaglandin dehydrogenase 15 (NAD)	221.798	-4.50311	0.245029	-14.2967	2.29283e-46	1.49651e-43
ENSMUSG00000029061	Mmp23	protein_coding	4	155650655	matrix metallopeptidase 23	308.113	-4.47132	0.243759	-14.2408	5.11696e-46	3.31691e-43
ENSMUSG00000044912	Syt16	protein_coding	12	73997661	synaptotagmin XVI	807.183	-6.41768	0.38093	-14.2222	6.66751e-46	4.29261e-43
ENSMUSG00000006642	Tcf23	protein_coding	5	30968662	transcription factor 23	194.345	-6.75912	0.406795	-14.1573	1.68305e-45	1.07624e-42
ENSMUSG00000014725	Adam28	protein_coding	14	68606027	a disintegrin and metallopeptidase domain 28	927.967	-5.41878	0.31487	-14.0336	9.70422e-45	6.04216e-42
ENSMUSG00000018862	Otop3	protein_coding	11	115334731	otopetrin 3	361.015	-9.38659	0.598057	-14.0231	1.12658e-44	6.96863e-42
ENSMUSG00000022226	Mcpt2	protein_coding	14	56042123	mast cell protease 2	534.666	-6.59158	0.400212	-13.9715	2.32525e-44	1.41975e-41
ENSMUSG00000067231	Cyp2c65	protein_coding	19	39061015	cytochrome P450, family 2, subfamily c, polypeptide 65	600.334	-9.61922	0.619817	-13.9061	5.81837e-44	3.52981e-41
ENSMUSG00000030049	Gkn2	protein_coding	6	87373357	gastrokine 2	22243.2	-7.24579	0.449488	-13.8953	6.76029e-44	4.07512e-41
ENSMUSG00000040990	Sh3kbp1	protein_coding	X	159627272	SH3-domain kinase binding protein 1	445.761	-4.51212	0.253224	-13.8696	9.68004e-44	5.79822e-41
ENSMUSG00000028356	Ambp	protein_coding	4	63143275	alpha 1 microglobulin/bikunin	3201.62	-10.9922	0.721256	-13.8539	1.20457e-43	7.16984e-41
ENSMUSG00000068011	Mkrn2os	protein_coding	6	115583544	makorin, ring finger protein 2, opposite strand	356.25	-4.3578	0.243875	-13.7685	3.94098e-43	2.30231e-40
ENSMUSG00000021895	Arhgef3	protein_coding	14	27114899	Rho guanine nucleotide exchange factor (GEF) 3	746.789	-3.31248	0.16946	-13.6462	2.12672e-42	1.22727e-39
ENSMUSG00000004113	Cacna1b	protein_coding	2	24603887	calcium channel, voltage-dependent, N type, alpha 1B subunit	368.803	-6.33483	0.391668	-13.6208	3.01347e-42	1.72845e-39
ENSMUSG00000034918	Cdhr2	protein_coding	13	54701461	cadherin-related family member 2	725.62	-6.74854	0.42276	-13.5976	4.13607e-42	2.35806e-39
ENSMUSG00000085683	9130409J20Rik	protein_coding	11	66956638	RIKEN cDNA 9130409J20 gene	279.737	-6.73007	0.423318	-13.5361	9.5776e-42	5.36345e-39
ENSMUSG00000029269	Sult1b1	protein_coding	5	87513339	sulfotransferase family 1B, member 1	298.753	-8.6682	0.567089	-13.522	1.15928e-41	6.45378e-39
ENSMUSG00000031097	Tnni2	protein_coding	7	142441808	troponin I, skeletal, fast 2	197.591	-4.37656	0.25169	-13.4155	4.90286e-41	2.6667e-38
ENSMUSG00000038963	Slco4a1	protein_coding	2	180456245	solute carrier organic anion transporter family, member 4a1	419.604	-4.18975	0.237821	-13.4124	5.11579e-41	2.76662e-38
ENSMUSG00000037440	Vnn1	protein_coding	10	23894688	vanin 1	4429.39	-4.33175	0.248799	-13.3913	6.79383e-41	3.65323e-38
ENSMUSG00000029727	Cyp3a13	protein_coding	5	137892932	cytochrome P450, family 3, subfamily a, polypeptide 13	5037.66	-4.73174	0.280009	-13.3272	1.60821e-40	8.55064e-38
ENSMUSG00000029556	Hnf1a	protein_coding	5	114948980	HNF1 homeobox A	186.891	-5.52926	0.34146	-13.2644	3.7236e-40	1.95779e-37
ENSMUSG00000031937	Vstm5	protein_coding	9	15239045	V-set and transmembrane domain containing 5	387.103	-5.11029	0.310822	-13.2239	6.38428e-40	3.33817e-37
ENSMUSG00000041827	Oasl1	protein_coding	5	114923240	2'-5' oligoadenylate synthetase-like 1	1244.04	-6.68974	0.430815	-13.2069	8.00228e-40	4.11596e-37
ENSMUSG00000047586	Nccrp1	protein_coding	7	28543596	non-specific cytotoxic cell receptor protein 1 homolog (zebrafish)	97.5695	-6.79058	0.445372	-13.0017	1.19708e-38	6.02614e-36
ENSMUSG00000059149	Mfsd4a	protein_coding	1	132022806	major facilitator superfamily domain containing 4A	2233.78	-3.78071	0.214608	-12.9571	2.14089e-38	1.07203e-35
ENSMUSG00000074653	Lrrc31	protein_coding	3	30679058	leucine rich repeat containing 31	307.343	-4.64186	0.281521	-12.9364	2.80516e-38	1.39726e-35
ENSMUSG00000024521	Pmaip1	protein_coding	18	66458604	phorbol-12-myristate-13-acetate-induced protein 1	2561.36	-5.41012	0.342917	-12.8606	7.49741e-38	3.67645e-35
ENSMUSG00000058952	Cfi	protein_coding	3	129835884	complement component factor i	3808.38	-5.8716	0.378931	-12.8562	7.94262e-38	3.87469e-35
ENSMUSG00000034427	Myo15b	protein_coding	11	115858406	myosin XVB	636.362	-4.84917	0.299466	-12.8535	8.22504e-38	3.99189e-35
ENSMUSG00000022683	Pla2g10	protein_coding	16	13715057	phospholipase A2, group X	280.962	-8.44423	0.583118	-12.7662	2.53094e-37	1.22208e-34
ENSMUSG00000018919	Tm4sf5	protein_coding	11	70505244	transmembrane 4 superfamily member 5	193.202	-8.78746	0.610622	-12.7533	2.9875e-37	1.43521e-34
ENSMUSG00000019762	Iyd	protein_coding	10	3540240	iodotyrosine deiodinase	1442.4	-4.89648	0.307984	-12.6516	1.09677e-36	5.18992e-34
ENSMUSG00000037946	Fgd3	protein_coding	13	49261554	FYVE, RhoGEF and PH domain containing 3	502.381	-4.90356	0.312045	-12.5096	6.61476e-36	3.05376e-33
ENSMUSG00000024600	Slc27a6	protein_coding	18	58556257	solute carrier family 27 (fatty acid transporter), member 6	117.798	-5.63831	0.370848	-12.5073	6.80868e-36	3.12803e-33
ENSMUSG00000031093	Dock11	protein_coding	X	35888832	dedicator of cytokinesis 11	1041.63	-4.56952	0.285758	-12.4914	8.31683e-36	3.80244e-33
ENSMUSG00000026065	Slc9a4	protein_coding	1	40580081	solute carrier family 9 (sodium/hydrogen exchanger), member 4	5215.6	-6.59883	0.449226	-12.4633	1.18401e-35	5.33593e-33
ENSMUSG00000020099	Unc5b	protein_coding	10	60762593	unc-5 netrin receptor B	1915.79	-4.63021	0.293743	-12.3584	4.38584e-35	1.93059e-32
ENSMUSG00000021211	Akr1c12	protein_coding	13	4268176	aldo-keto reductase family 1, member C12	518.011	-5.59723	0.372312	-12.3478	5.00624e-35	2.19348e-32
ENSMUSG00000052131	Akr1b7	protein_coding	6	34412334	aldo-keto reductase family 1, member B7	418.835	-9.13064	0.663288	-12.2581	1.52058e-34	6.60128e-32
ENSMUSG00000037390	Muc3	protein_coding	5	137134922	mucin 3, intestinal	843.91	-8.61598	0.624283	-12.1996	3.12497e-34	1.34431e-31
ENSMUSG00000040274	Cdk6	protein_coding	5	3341485	cyclin-dependent kinase 6	1033.22	-2.40284	0.116726	-12.0183	2.8494e-33	1.19852e-30
ENSMUSG00000017607	Tns4	protein_coding	11	99065678	tensin 4	1683.8	-4.89461	0.325791	-11.9543	6.16386e-33	2.52531e-30
ENSMUSG00000029359	Tesc	protein_coding	5	118027743	tescalcin	299.136	-5.46553	0.375029	-11.9072	1.08584e-32	4.39161e-30
ENSMUSG00000033579	Fa2h	protein_coding	8	111345135	fatty acid 2-hydroxylase	87.7867	-5.08155	0.345617	-11.8094	3.48863e-32	1.3931e-29
ENSMUSG00000021536	Adcy2	protein_coding	13	68620043	adenylate cyclase 2	209.878	-5.4539	0.378396	-11.7705	5.54184e-32	2.18533e-29
ENSMUSG00000029273	Sult1d1	protein_coding	5	87554645	sulfotransferase family 1D, member 1	382.68	-8.19648	0.611539	-11.7678	5.71854e-32	2.24565e-29
ENSMUSG00000025185	Loxl4	protein_coding	19	42593982	lysyl oxidase-like 4	224.868	-5.13919	0.358171	-11.5564	6.84863e-31	2.55179e-28
ENSMUSG00000020122	Egfr	protein_coding	11	16752203	epidermal growth factor receptor	388.956	-4.25245	0.282207	-11.525	9.8662e-31	3.66171e-28
ENSMUSG00000028255	Clca1	protein_coding	3	145003817	chloride channel accessory 1	30451.2	-13.1582	1.05842	-11.4871	1.53149e-30	5.61782e-28
ENSMUSG00000026175	Vil1	protein_coding	1	74409376	villin 1	1577.55	-5.12868	0.359971	-11.4695	1.87777e-30	6.86148e-28
ENSMUSG00000035818	Plekhs1	protein_coding	19	56461640	pleckstrin homology domain containing, family S member 1	659.736	-7.92414	0.609432	-11.3616	6.49168e-30	2.30967e-27
ENSMUSG00000036813	Entpd8	protein_coding	2	25080304	ectonucleoside triphosphate diphosphohydrolase 8	101.015	-7.54814	0.583212	-11.2277	2.98043e-29	1.02945e-26
ENSMUSG00000045912	C2cd4c	protein_coding	10	79606854	C2 calcium-dependent domain containing 4C	145.847	-4.22566	0.287375	-11.2245	3.08966e-29	1.06329e-26
ENSMUSG00000055114	Anxa13	protein_coding	15	58341874	annexin A13	550.582	-9.14248	0.725712	-11.22	3.25303e-29	1.11546e-26
ENSMUSG00000034738	Nostrin	protein_coding	2	69135800	nitric oxide synthase trafficker	375.768	-3.17115	0.193582	-11.2157	3.41588e-29	1.16707e-26
ENSMUSG00000048070	Pirt	protein_coding	11	66911981	phosphoinositide-interacting regulator of transient receptor potential channels	213.922	-4.81129	0.340056	-11.2078	3.73231e-29	1.2706e-26
ENSMUSG00000055730	Ces2a	protein_coding	8	104734003	carboxylesterase 2A	224.834	-11.8948	0.974021	-11.1853	4.81032e-29	1.61436e-26
ENSMUSG00000042894	Olfr1260	protein_coding	2	89974340	olfactory receptor 1260	201.917	-4.0405	0.27308	-11.1341	8.56111e-29	2.86298e-26
ENSMUSG00000043501	Lgals2	protein_coding	15	78850862	lectin, galactose-binding, soluble 2	165.95	-4.91003	0.353106	-11.0732	1.69164e-28	5.55892e-26
ENSMUSG00000021213	Akr1c13	protein_coding	13	4191150	aldo-keto reductase family 1, member C13	1598.7	-3.77655	0.254476	-10.9109	1.02285e-27	3.29261e-25
ENSMUSG00000019989	Enpp3	protein_coding	10	24772406	ectonucleotide pyrophosphatase/phosphodiesterase 3	385.761	-7.34024	0.582888	-10.8773	1.47894e-27	4.72862e-25
ENSMUSG00000029644	Pdx1	protein_coding	5	147269959	pancreatic and duodenal homeobox 1	164.005	-6.27577	0.490437	-10.7573	5.4762e-27	1.71045e-24
ENSMUSG00000032066	Bco2	protein_coding	9	50533087	beta-carotene oxygenase 2	735.446	-4.79719	0.354068	-10.7244	7.81593e-27	2.43322e-24
ENSMUSG00000022809	Nr1i2	protein_coding	16	38248323	nuclear receptor subfamily 1, group I, member 2	235.275	-5.63714	0.432522	-10.7212	8.0984e-27	2.51289e-24
ENSMUSG00000040473	Cfap69	protein_coding	5	5579278	cilia and flagella associated protein 69	756.001	-5.82219	0.453651	-10.6297	2.16726e-26	6.63785e-24
ENSMUSG00000020312	Shc2	protein_coding	10	79618051	SHC (Src homology 2 domain containing) transforming protein 2	305.887	-5.02221	0.380038	-10.5837	3.54633e-26	1.07228e-23
ENSMUSG00000027792	Bche	protein_coding	3	73635808	butyrylcholinesterase	308.727	-5.911	0.46484	-10.5649	4.33334e-26	1.30608e-23
ENSMUSG00000025658	Cnksr2	protein_coding	X	157821436	connector enhancer of kinase suppressor of Ras 2	147.5	-4.2912	0.311622	-10.5615	4.49416e-26	1.35024e-23
ENSMUSG00000062309	Rpp25	protein_coding	9	57504026	ribonuclease P/MRP 25 subunit	160.234	-5.27394	0.406047	-10.5257	6.5763e-26	1.96335e-23
ENSMUSG00000061531	Tmem236	protein_coding	2	14174523	transmembrane protein 236	302.576	-5.93911	0.480371	-10.2819	8.50636e-25	2.49239e-22
ENSMUSG00000059401	Mamld1	protein_coding	X	71050256	mastermind-like domain containing 1	220.453	-3.07032	0.202278	-10.235	1.38172e-24	3.98676e-22
ENSMUSG00000028357	Kif12	protein_coding	4	63165630	kinesin family member 12	805.312	-7.54301	0.640044	-10.2228	1.56826e-24	4.51124e-22
ENSMUSG00000032265	Fam46a	protein_coding	9	85320439	family with sequence similarity 46, member A	451.726	-3.37838	0.232923	-10.2111	1.76936e-24	5.07432e-22
ENSMUSG00000033213	AA467197	protein_coding	2	122636986	expressed sequence AA467197	929.795	-6.46927	0.540105	-10.1263	4.22288e-24	1.18591e-21
ENSMUSG00000046668	Cxxc5	protein_coding	18	35829818	CXXC finger 5	309.763	-2.862	0.183934	-10.1232	4.35887e-24	1.22048e-21
ENSMUSG00000047180	Neurl3	protein_coding	1	36264597	neuralized E3 ubiquitin protein ligase 3	2590.08	-4.07524	0.307108	-10.0135	1.32905e-23	3.62483e-21
ENSMUSG00000053279	Aldh1a1	protein_coding	19	20492715	aldehyde dehydrogenase family 1, subfamily A1	1912.7	-3.16508	0.216582	-9.99658	1.57754e-23	4.26568e-21
ENSMUSG00000047728	BC025446	protein_coding	15	75216376	cDNA sequence BC025446	140.126	-3.89587	0.290892	-9.95517	2.39419e-23	6.4371e-21
ENSMUSG00000024028	Tff2	protein_coding	17	31141049	trefoil factor 2 (spasmolytic protein 1)	4857.99	-8.10307	0.715813	-9.92308	3.30385e-23	8.80777e-21
ENSMUSG00000041237	Pklr	protein_coding	3	89136142	pyruvate kinase liver and red blood cell	929.598	-9.22876	0.835136	-9.85319	6.63996e-23	1.73115e-20
ENSMUSG00000047496	Rnf152	protein_coding	1	105276914	ring finger protein 152	163.088	-4.68152	0.375551	-9.80297	1.09326e-22	2.82695e-20
ENSMUSG00000010601	Apol7a	protein_coding	15	77388221	apolipoprotein L 7a	127.762	-4.75599	0.384137	-9.77773	1.40318e-22	3.58911e-20
ENSMUSG00000027210	Meis2	protein_coding	2	115863064	Meis homeobox 2	192.236	-5.54757	0.468306	-9.71068	2.7152e-22	6.88919e-20
ENSMUSG00000031538	Plat	protein_coding	8	22757727	plasminogen activator, tissue	2313.1	-4.71443	0.38306	-9.69675	3.11252e-22	7.83429e-20
ENSMUSG00000028415	Spink4	protein_coding	4	40920052	serine peptidase inhibitor, Kazal type 4	824.176	-7.40981	0.666863	-9.61188	7.1237e-22	1.76028e-19
ENSMUSG00000025780	Itih5	protein_coding	2	10153571	inter-alpha (globulin) inhibitor H5	138.615	-3.6999	0.281577	-9.58849	8.93821e-22	2.19148e-19
ENSMUSG00000029154	Cwh43	protein_coding	5	73406075	cell wall biogenesis 43 C-terminal homolog	2884.44	-5.5447	0.474901	-9.56979	1.07123e-21	2.61292e-19
ENSMUSG00000040605	Bace2	protein_coding	16	97356728	beta-site APP-cleaving enzyme 2	4380.37	-5.35384	0.455234	-9.56396	1.13338e-21	2.75034e-19
ENSMUSG00000022754	Tmem45a	protein_coding	16	56805161	transmembrane protein 45a	574.636	-7.11463	0.639572	-9.5605	1.1719e-21	2.83654e-19
ENSMUSG00000032058	Ppp2r1b	protein_coding	9	50845301	protein phosphatase 2, regulatory subunit A, beta	434.775	-2.8498	0.194184	-9.52601	1.63446e-21	3.93602e-19
ENSMUSG00000109957	Gm45353	lincRNA	8	122339171	predicted gene 45353	127.173	-5.66369	0.490025	-9.51725	1.77817e-21	4.24965e-19
ENSMUSG00000017688	Hnf4g	protein_coding	3	3508030	hepatocyte nuclear factor 4, gamma	90.0752	-4.97194	0.418415	-9.49281	2.24892e-21	5.32094e-19
ENSMUSG00000036151	Tm6sf2	protein_coding	8	70072924	transmembrane 6 superfamily member 2	109.777	-3.39238	0.252197	-9.48618	2.39661e-21	5.64216e-19
ENSMUSG00000036731	Cysrt1	protein_coding	2	25238818	cysteine rich tail 1	41.1424	-4.56322	0.376426	-9.46592	2.90987e-21	6.83349e-19
ENSMUSG00000075010	AW112010	lincRNA	19	11047617	expressed sequence AW112010	2139.02	-5.61411	0.490551	-9.40599	5.15433e-21	1.19854e-18
ENSMUSG00000074300	BC030870	protein_coding	8	65085613	cDNA sequence BC030870	174.117	-4.38836	0.360289	-9.40457	5.22442e-21	1.21186e-18
ENSMUSG00000027188	Pamr1	protein_coding	2	102550012	peptidase domain containing associated with muscle regeneration 1	2055.82	-6.11231	0.546334	-9.3575	8.16491e-21	1.87101e-18
ENSMUSG00000036098	Myrf	protein_coding	19	10208272	myelin regulatory factor	5001.57	-4.04357	0.326046	-9.33479	1.01188e-20	2.30203e-18
ENSMUSG00000044461	Shisa2	protein_coding	14	59625308	shisa family member 2	147.109	-5.82177	0.521426	-9.24727	2.30292e-20	5.17691e-18
ENSMUSG00000031430	Vsig1	protein_coding	X	140907608	V-set and immunoglobulin domain containing 1	2886.41	-4.41456	0.369912	-9.23074	2.68771e-20	6.02761e-18
ENSMUSG00000032348	Gsta4	protein_coding	9	78182774	glutathione S-transferase, alpha 4	26484.3	-2.62838	0.176778	-9.21143	3.21805e-20	7.19991e-18
ENSMUSG00000067714	Lpar5	protein_coding	6	125067920	lysophosphatidic acid receptor 5	72.7731	-6.71344	0.623365	-9.16548	4.93278e-20	1.09586e-17
ENSMUSG00000051586	Mical3	protein_coding	6	120931707	microtubule associated monooxygenase, calponin and LIM domain containing 3	464.562	-3.34649	0.25739	-9.11649	7.75954e-20	1.7118e-17
ENSMUSG00000013523	Bcas1	protein_coding	2	170346991	breast carcinoma amplified sequence 1	2848.4	-4.01347	0.334153	-9.01825	1.91116e-19	4.17718e-17
ENSMUSG00000025467	Prap1	protein_coding	7	140093395	proline-rich acidic protein 1	72.6561	-7.72402	0.746405	-9.00854	2.08826e-19	4.55375e-17
ENSMUSG00000044646	Zbtb7c	protein_coding	18	75820178	zinc finger and BTB domain containing 7C	311.331	-3.60867	0.289589	-9.00817	2.09533e-19	4.55866e-17
ENSMUSG00000032184	Lysmd2	protein_coding	9	75625741	LysM, putative peptidoglycan-binding, domain containing 2	127.89	-2.67722	0.186675	-8.9847	2.59443e-19	5.58039e-17
ENSMUSG00000058152	Chsy3	protein_coding	18	59175401	chondroitin sulfate synthase 3	204.453	-3.49217	0.277484	-8.98134	2.67493e-19	5.74048e-17
ENSMUSG00000002384	Bmp8b	protein_coding	4	123105165	bone morphogenetic protein 8b	108.835	-3.8544	0.317862	-8.98	2.70763e-19	5.7975e-17
ENSMUSG00000036053	Fmnl2	protein_coding	2	52857860	formin-like 2	851.931	-3.48735	0.277947	-8.94899	3.58761e-19	7.66436e-17
ENSMUSG00000024331	Dsc2	protein_coding	18	20030633	desmocollin 2	1001.36	-4.71928	0.421163	-8.83096	1.0378e-18	2.19236e-16
ENSMUSG00000020846	Rflnb	protein_coding	11	76019194	refilin B	942.637	-3.06605	0.235601	-8.76928	1.79816e-18	3.76499e-16
ENSMUSG00000025329	Padi1	protein_coding	4	140812983	peptidyl arginine deiminase, type I	123.607	-4.9896	0.460964	-8.65491	4.93298e-18	1.01491e-15
ENSMUSG00000031844	Hsd17b2	protein_coding	8	117701904	hydroxysteroid (17-beta) dehydrogenase 2	146.685	-8.98839	0.930137	-8.5884	8.81877e-18	1.79872e-15
ENSMUSG00000025401	Myo1a	protein_coding	10	127705170	myosin IA	1445.94	-4.54526	0.414424	-8.55468	1.18198e-17	2.40048e-15
ENSMUSG00000024180	Tmem8	protein_coding	17	26113316	transmembrane protein 8 (five membrane-spanning domains)	2024.53	-2.16998	0.136816	-8.55153	1.21472e-17	2.4617e-15
ENSMUSG00000071203	Naip5	protein_coding	13	100211739	NLR family, apoptosis inhibitory protein 5	326.717	-3.65808	0.311045	-8.54564	1.27828e-17	2.58497e-15
ENSMUSG00000090035	Galnt4	protein_coding	10	99108159	UDP-N-acetyl-alpha-D-galactosamine:polypeptide N-acetylgalactosaminyltransferase 4	2390.74	-2.26432	0.148259	-8.52774	1.49239e-17	3.00509e-15
ENSMUSG00000096914	Galntl6	protein_coding	8	57774052	UDP-N-acetyl-alpha-D-galactosamine:polypeptide N-acetylgalactosaminyltransferase-like 6	145.613	-5.30526	0.506328	-8.50291	1.84897e-17	3.70733e-15
ENSMUSG00000025347	Mettl7b	protein_coding	10	128958274	methyltransferase like 7B	444.028	-3.52567	0.297307	-8.49514	1.97691e-17	3.95548e-15
ENSMUSG00000026981	Il1rn	protein_coding	2	24336853	interleukin 1 receptor antagonist	535.674	-3.50535	0.295207	-8.48677	2.12464e-17	4.23084e-15
ENSMUSG00000032454	Rbp2	protein_coding	9	98486115	retinol binding protein 2, cellular	168.004	-4.20404	0.378272	-8.47021	2.44949e-17	4.84979e-15
ENSMUSG00000022408	Fam83f	protein_coding	15	80671847	family with sequence similarity 83, member F	243.363	-4.19586	0.377534	-8.46509	2.55952e-17	5.05706e-15
ENSMUSG00000052914	Cyp2j6	protein_coding	4	96516138	cytochrome P450, family 2, subfamily j, polypeptide 6	1239.47	-2.92273	0.227706	-8.44393	3.06855e-17	6.02506e-15
ENSMUSG00000027399	Il1a	protein_coding	2	129299610	interleukin 1 alpha	606.298	-5.46724	0.53021	-8.4254	3.59509e-17	7.04429e-15
ENSMUSG00000037408	Cnnm4	protein_coding	1	36471620	cyclin M4	807.121	-2.67271	0.198766	-8.41548	3.91305e-17	7.65147e-15
ENSMUSG00000048251	Bcl11b	protein_coding	12	107910403	B cell leukemia/lymphoma 11B	181.08	-2.82204	0.217998	-8.35806	6.37578e-17	1.23902e-14
ENSMUSG00000035506	Slc12a8	protein_coding	16	33517328	solute carrier family 12 (potassium/chloride transporters), member 8	289.32	-3.68978	0.321909	-8.35574	6.50236e-17	1.26103e-14
ENSMUSG00000000544	Gpa33	protein_coding	1	166130238	glycoprotein A33 (transmembrane)	2100.02	-5.22821	0.509067	-8.3058	9.91473e-17	1.91496e-14
ENSMUSG00000026271	Gpr35	protein_coding	1	92950865	G protein-coupled receptor 35	327.833	-3.3347	0.281325	-8.29894	1.05042e-16	2.02469e-14
ENSMUSG00000097651	4930461G14Rik	lincRNA	9	58455122	RIKEN cDNA 4930461G14 gene	35.1529	-9.33527	1.00551	-8.28959	1.13642e-16	2.18156e-14
ENSMUSG00000067377	Tspan6	protein_coding	X	133891068	tetraspanin 6	139.154	-3.76484	0.334992	-8.25345	1.53885e-16	2.92443e-14
ENSMUSG00000041984	Rptn	protein_coding	3	93393699	repetin	74.036	-5.08154	0.495713	-8.23367	1.81564e-16	3.44353e-14
ENSMUSG00000040722	Scamp5	protein_coding	9	57441327	secretory carrier membrane protein 5	2060.21	-3.24983	0.273427	-8.22828	1.89917e-16	3.59475e-14
ENSMUSG00000038599	Capn8	protein_coding	1	182565007	calpain 8	194.054	-3.8475	0.348467	-8.17151	3.04561e-16	5.71897e-14
ENSMUSG00000043430	Psapl1	protein_coding	5	36204021	prosaposin-like 1	169.882	-3.50089	0.306987	-8.14657	3.74406e-16	6.97516e-14
ENSMUSG00000031906	Smpd3	protein_coding	8	106252548	sphingomyelin phosphodiesterase 3, neutral	4240.64	-4.59686	0.442584	-8.12695	4.40212e-16	8.16895e-14
ENSMUSG00000002847	Pla1a	protein_coding	16	38396119	phospholipase A1 member A	77.0649	-4.59573	0.442578	-8.12451	4.49168e-16	8.31884e-14
ENSMUSG00000094840	Muc3a	protein_coding	5	137208813	mucin 3A, cell surface associated	193.396	-7.61967	0.816109	-8.11126	5.0097e-16	9.22408e-14
ENSMUSG00000045518	Onecut3	protein_coding	10	80494835	one cut domain, family member 3	73.6613	-3.72106	0.335904	-8.1007	5.46418e-16	1.00105e-13
ENSMUSG00000039131	Gipc2	protein_coding	3	152093533	GIPC PDZ domain containing family, member 2	945.444	-3.42146	0.298933	-8.10035	5.48032e-16	1.00127e-13
ENSMUSG00000002997	Prkar2b	protein_coding	12	31958476	protein kinase, cAMP dependent regulatory, type II beta	238.499	-3.1161	0.261415	-8.09479	5.73649e-16	1.04605e-13
ENSMUSG00000020609	Apob	protein_coding	12	7977648	apolipoprotein B	2933.33	-4.38656	0.419215	-8.07834	6.56556e-16	1.19264e-13
ENSMUSG00000007034	Slc44a4	protein_coding	17	34914466	solute carrier family 44, member 4	2306.06	-2.25939	0.15668	-8.03802	9.13037e-16	1.63965e-13
ENSMUSG00000024034	Tmprss3	protein_coding	17	31179272	transmembrane protease, serine 3	33.2326	-4.4893	0.437454	-7.97639	1.50675e-15	2.67539e-13
ENSMUSG00000021262	Evl	protein_coding	12	108554720	Ena-vasodilator stimulated phosphoprotein	803.135	-3.41738	0.30373	-7.95898	1.73465e-15	3.06855e-13
ENSMUSG00000031098	Syt8	protein_coding	7	142434850	synaptotagmin VIII	2086	-3.50866	0.316557	-7.92481	2.28494e-15	4.012e-13
ENSMUSG00000022227	Mcpt1	protein_coding	14	56017964	mast cell protease 1	98.073	-4.44907	0.436007	-7.91057	2.56205e-15	4.48194e-13
ENSMUSG00000031576	Kcnu1	protein_coding	8	25849623	potassium channel, subfamily U, member 1	56.9369	-5.94891	0.625685	-7.9096	2.58224e-15	4.50892e-13
ENSMUSG00000020912	Krt12	protein_coding	11	99415666	keratin 12	48.8049	-8.49525	0.948886	-7.89899	2.81168e-15	4.90051e-13
ENSMUSG00000114821	AC129202.3	lincRNA	13	39463227		124.318	-8.5402	0.955363	-7.89251	2.96177e-15	5.15262e-13
ENSMUSG00000046093	Hpcal4	protein_coding	4	123183227	hippocalcin-like 4	67.9838	-5.99315	0.63328	-7.88459	3.15563e-15	5.46977e-13
ENSMUSG00000009646	Pla2g12b	protein_coding	10	59403660	phospholipase A2, group XIIB	99.0705	-4.38586	0.430013	-7.87386	3.43877e-15	5.92796e-13
ENSMUSG00000027356	Fermt1	protein_coding	2	132904389	fermitin family member 1	2332.83	-5.06673	0.517235	-7.86244	3.76736e-15	6.4826e-13
ENSMUSG00000039257	Vstm2b	protein_coding	7	40898328	V-set and transmembrane domain containing 2B	98.6074	-7.21747	0.791881	-7.85152	4.11024e-15	7.03424e-13
ENSMUSG00000028217	Cdh17	protein_coding	4	11758147	cadherin 17	36.5148	-3.98348	0.380105	-7.8491	4.19035e-15	7.15839e-13
ENSMUSG00000071537	Klrg2	protein_coding	6	38625693	killer cell lectin-like receptor subfamily G, member 2	178.728	-3.89231	0.369211	-7.83374	4.73578e-15	8.04658e-13
ENSMUSG00000032773	Chrm1	protein_coding	19	8663789	cholinergic receptor, muscarinic 1, CNS	189.045	-3.70827	0.345807	-7.83174	4.81169e-15	8.16091e-13
ENSMUSG00000040613	Apobec1	protein_coding	6	122577792	apolipoprotein B mRNA editing enzyme, catalytic polypeptide 1	185.337	-3.50468	0.320137	-7.82377	5.12658e-15	8.64848e-13
ENSMUSG00000032436	Cmtm7	protein_coding	9	114756836	CKLF-like MARVEL transmembrane domain containing 7	909.142	-2.6438	0.210456	-7.81066	5.68873e-15	9.56272e-13
ENSMUSG00000035085	1700020L24Rik	protein_coding	11	83437677	RIKEN cDNA 1700020L24 gene	42.9961	-4.19875	0.412155	-7.76103	8.42454e-15	1.40369e-12
ENSMUSG00000040600	Eps8l3	protein_coding	3	107877229	EPS8-like 3	1955.61	-6.7711	0.744837	-7.74814	9.32487e-15	1.54554e-12
ENSMUSG00000024313	Mep1b	protein_coding	18	21072344	meprin 1 beta	48.1352	-8.3686	0.953004	-7.73197	1.05892e-14	1.74898e-12
ENSMUSG00000066800	Rnasel	protein_coding	1	153749426	ribonuclease L (2', 5'-oligoisoadenylate synthetase-dependent)	583.676	-2.79931	0.233093	-7.71928	1.16984e-14	1.92881e-12
ENSMUSG00000072620	Slfn2	protein_coding	11	83065112	schlafen 2	633.555	-3.97751	0.386225	-7.70926	1.26548e-14	2.08287e-12
ENSMUSG00000019966	Kitl	protein_coding	10	100015630	kit ligand	880.196	-3.20357	0.288614	-7.635	2.25813e-14	3.65942e-12
ENSMUSG00000047638	Nr1h4	protein_coding	10	89454234	nuclear receptor subfamily 1, group H, member 4	185.41	-3.56275	0.336553	-7.61471	2.64294e-14	4.23278e-12
ENSMUSG00000023045	Soat2	protein_coding	15	102150526	sterol O-acyltransferase 2	315.561	-3.27313	0.299096	-7.60001	2.96119e-14	4.72592e-12
ENSMUSG00000050103	Agmo	protein_coding	12	37241641	alkylglycerol monooxygenase	218.53	-4.0046	0.396301	-7.58159	3.41345e-14	5.40215e-12
ENSMUSG00000078942	Naip6	protein_coding	13	100281121	NLR family, apoptosis inhibitory protein 6	273.035	-3.0629	0.274892	-7.50442	6.16997e-14	9.63574e-12
ENSMUSG00000022843	Clcn2	protein_coding	16	20702964	chloride channel, voltage-sensitive 2	836.769	-2.69295	0.226287	-7.48145	7.35084e-14	1.14046e-11
ENSMUSG00000035041	Creb3l3	protein_coding	10	81084324	cAMP responsive element binding protein 3-like 3	66.6275	-7.05374	0.813033	-7.44587	9.63047e-14	1.48683e-11
ENSMUSG00000020407	Upp1	protein_coding	11	9118103	uridine phosphorylase 1	149.799	-3.28076	0.306752	-7.43519	1.04416e-13	1.60682e-11
ENSMUSG00000037974	Muc5ac	protein_coding	7	141788972	mucin 5, subtypes A and C, tracheobronchial/gastric	833.915	-4.03737	0.408791	-7.43014	1.08486e-13	1.66404e-11
ENSMUSG00000044042	Fmn1	protein_coding	2	113327736	formin 1	1030.68	-2.61207	0.217031	-7.42787	1.10363e-13	1.6901e-11
ENSMUSG00000038807	Rap1gap2	protein_coding	11	74383356	RAP1 GTPase activating protein 2	445.086	-3.3993	0.323315	-7.42094	1.16296e-13	1.77807e-11
ENSMUSG00000024556	Me2	protein_coding	18	73770040	malic enzyme 2, NAD(+)-dependent, mitochondrial	1373.62	-2.47358	0.198629	-7.41876	1.18222e-13	1.8046e-11
ENSMUSG00000064115	Cadm2	protein_coding	16	66655421	cell adhesion molecule 2	60.5742	-5.83855	0.652876	-7.41113	1.25223e-13	1.90839e-11
ENSMUSG00000010651	Acaa1b	protein_coding	9	119148023	acetyl-Coenzyme A acyltransferase 1B	68.5695	-4.40205	0.460134	-7.39362	1.42884e-13	2.17055e-11
ENSMUSG00000057933	Gsta2	protein_coding	9	78331018	glutathione S-transferase, alpha 2 (Yc2)	685.022	-7.32986	0.857894	-7.37837	1.60237e-13	2.41864e-11
ENSMUSG00000079593	Gm14597	protein_coding	X	53577087	predicted gene 14597	24.1947	-7.90425	0.937588	-7.36384	1.78697e-13	2.68442e-11
ENSMUSG00000004038	Gstm3	protein_coding	3	107963696	glutathione S-transferase, mu 3	43.3607	-5.08807	0.555338	-7.36142	1.81967e-13	2.72922e-11
ENSMUSG00000032068	Plet1	protein_coding	9	50494525	placenta expressed transcript 1	6009.38	-2.97226	0.268333	-7.35003	1.98169e-13	2.96283e-11
ENSMUSG00000042195	Slc35f2	protein_coding	9	53771538	solute carrier family 35, member F2	64.3105	-5.58959	0.625718	-7.33491	2.21866e-13	3.30147e-11
ENSMUSG00000021892	Sh3bp5	protein_coding	14	31359880	SH3-domain binding protein 5 (BTK-associated)	117.069	-3.54194	0.346789	-7.32994	2.30248e-13	3.42082e-11
ENSMUSG00000054958	Nt5c1a	protein_coding	4	123201504	5'-nucleotidase, cytosolic IA	24.2454	-8.24249	0.990642	-7.31091	2.65348e-13	3.91771e-11
ENSMUSG00000021974	Fgf9	protein_coding	14	58070547	fibroblast growth factor 9	99.3487	-5.86828	0.666975	-7.29903	2.89841e-13	4.27267e-11
ENSMUSG00000066720	Cldn9	protein_coding	17	23682584	claudin 9	21.2472	-5.32734	0.595767	-7.26347	3.7728e-13	5.54437e-11
ENSMUSG00000002228	Ppm1j	protein_coding	3	104781056	protein phosphatase 1J	68.579	-3.47421	0.34147	-7.24577	4.29978e-13	6.28951e-11
ENSMUSG00000030866	Ern2	protein_coding	7	122169893	endoplasmic reticulum (ER) to nucleus signalling 2	2822.01	-5.20578	0.580807	-7.24127	4.44513e-13	6.49209e-11
ENSMUSG00000032246	Calml4	protein_coding	9	62858080	calmodulin-like 4	111.493	-4.2804	0.456547	-7.18525	6.70819e-13	9.67779e-11
ENSMUSG00000015224	Cyp2j9	protein_coding	4	96568429	cytochrome P450, family 2, subfamily j, polypeptide 9	107.85	-4.26779	0.455529	-7.17361	7.30433e-13	1.05058e-10
ENSMUSG00000026589	Sec16b	protein_coding	1	157506728	SEC16 homolog B (S. cerevisiae)	317.233	-3.78394	0.390128	-7.13598	9.6098e-13	1.36353e-10
ENSMUSG00000002992	Apoc2	protein_coding	7	19671579	apolipoprotein C-II	106.212	-4.9171	0.552027	-7.09584	1.28567e-12	1.80796e-10
ENSMUSG00000025017	Pik3ap1	protein_coding	19	41274218	phosphoinositide-3-kinase adaptor protein 1	1566.42	-3.23686	0.316584	-7.06563	1.59886e-12	2.23509e-10
ENSMUSG00000026227	2810459M11Rik	protein_coding	1	86045863	RIKEN cDNA 2810459M11 gene	685.061	-3.17031	0.307178	-7.06532	1.60246e-12	2.23682e-10
ENSMUSG00000063646	Jakmip1	protein_coding	5	37028335	janus kinase and microtubule interacting protein 1	275.228	-4.53222	0.501135	-7.04844	1.80936e-12	2.50347e-10
ENSMUSG00000043639	Rbm20	protein_coding	19	53677306	RNA binding motif protein 20	45.1029	-3.80064	0.397566	-7.04446	1.86176e-12	2.56847e-10
ENSMUSG00000033854	Kcnk10	protein_coding	12	98429437	potassium channel, subfamily K, member 10	57.8389	-6.17378	0.734636	-7.04264	1.88626e-12	2.59848e-10
ENSMUSG00000052631	Sh2d6	protein_coding	6	72513644	SH2 domain containing 6	294.735	-8.2283	1.0286	-7.0273	2.10566e-12	2.88811e-10
ENSMUSG00000055926	Gm14137	protein_coding	2	119174509	predicted gene 14137	194.708	-2.83844	0.261853	-7.02087	2.20492e-12	3.01987e-10
ENSMUSG00000043668	Tox3	protein_coding	8	90247040	TOX high mobility group box family member 3	609.676	-3.95319	0.42107	-7.01354	2.32358e-12	3.1778e-10
ENSMUSG00000038793	Lefty1	protein_coding	1	180935022	left right determination factor 1	63.91	-3.32123	0.331642	-6.9992	2.57434e-12	3.51566e-10
ENSMUSG00000067813	Xkr9	protein_coding	1	13668771	X-linked Kx blood group related 9	26.0132	-5.48412	0.641977	-6.98486	2.85132e-12	3.88831e-10
ENSMUSG00000023000	Dhh	protein_coding	15	98893031	desert hedgehog	34.3041	-3.88113	0.416337	-6.92018	4.51069e-12	6.10718e-10
ENSMUSG00000030935	Acsm3	protein_coding	7	119760923	acyl-CoA synthetase medium-chain family member 3	709.562	-6.76278	0.833396	-6.91482	4.68443e-12	6.33335e-10
ENSMUSG00000024105	Themis3	protein_coding	17	66555252	thymocyte selection associated family member 3	39.8346	-4.01454	0.436972	-6.89871	5.24755e-12	7.06442e-10
ENSMUSG00000055301	Adh7	protein_coding	3	138217760	alcohol dehydrogenase 7 (class IV), mu or sigma polypeptide	80.5098	-6.42321	0.786843	-6.89237	5.48722e-12	7.3661e-10
ENSMUSG00000079339	Ifit1bl1	protein_coding	19	34592888	interferon induced protein with tetratricpeptide repeats 1B like 1	798.6	-4.75639	0.549579	-6.83502	8.19917e-12	1.08832e-09
ENSMUSG00000021263	Degs2	protein_coding	12	108678711	delta(4)-desaturase, sphingolipid 2	1227.73	-4.61763	0.531413	-6.80757	9.92615e-12	1.30837e-09
ENSMUSG00000043592	Unc5cl	protein_coding	17	48454901	unc-5 family C-terminal like	135.812	-4.0889	0.453897	-6.80529	1.00849e-11	1.3264e-09
ENSMUSG00000045672	Col27a1	protein_coding	4	63214004	collagen, type XXVII, alpha 1	322.962	-3.17735	0.320126	-6.80153	1.03512e-11	1.35684e-09
ENSMUSG00000094559	Cyp2d34	protein_coding	15	82615965	cytochrome P450, family 2, subfamily d, polypeptide 34	24.3571	-8.20791	1.06237	-6.78474	1.16297e-11	1.51394e-09
ENSMUSG00000038372	Gmds	protein_coding	13	31819579	GDP-mannose 4, 6-dehydratase	1487.29	-2.38631	0.205326	-6.75174	1.46085e-11	1.89132e-09
ENSMUSG00000037860	Aim2	protein_coding	1	173350879	absent in melanoma 2	124.822	-3.28529	0.341046	-6.70082	2.07252e-11	2.66498e-09
ENSMUSG00000029371	Cxcl5	protein_coding	5	90759360	chemokine (C-X-C motif) ligand 5	867.693	-4.55348	0.531143	-6.69024	2.22807e-11	2.85724e-09
ENSMUSG00000026401	Cd55b	protein_coding	1	130388537	CD55 molecule, decay accelerating factor for complement B	72.2685	-4.94912	0.591384	-6.67776	2.4263e-11	3.10304e-09
ENSMUSG00000049577	Zfpm1	protein_coding	8	122282141	zinc finger protein, multitype 1	3647.29	-2.50914	0.226691	-6.65727	2.78952e-11	3.55317e-09
ENSMUSG00000036805	Noxa1	protein_coding	2	25085667	NADPH oxidase activator 1	128.931	-3.80107	0.426402	-6.56908	5.06267e-11	6.32099e-09
ENSMUSG00000017639	Rab11fip4	protein_coding	11	79591212	RAB11 family interacting protein 4 (class II)	249.187	-2.72977	0.26411	-6.54943	5.77563e-11	7.1639e-09
ENSMUSG00000033427	Upb1	protein_coding	10	75401115	ureidopropionase, beta	62.5413	-3.82722	0.432618	-6.53516	6.35433e-11	7.8611e-09
ENSMUSG00000033377	Palmd	protein_coding	3	116918258	palmdelphin	718.792	-4.11645	0.477394	-6.52805	6.66309e-11	8.22158e-09
ENSMUSG00000021216	Tubal3	protein_coding	13	3918274	tubulin, alpha-like 3	25.4328	-4.4505	0.529297	-6.51902	7.0768e-11	8.70752e-09
ENSMUSG00000035811	Ugt2b35	protein_coding	5	87000860	UDP glucuronosyltransferase 2 family, polypeptide B35	52.9832	-6.08186	0.782761	-6.49222	8.45793e-11	1.03418e-08
ENSMUSG00000033208	S100b	protein_coding	10	76253853	S100 protein, beta polypeptide, neural	104.136	-3.3896	0.368857	-6.47838	9.27102e-11	1.12923e-08
ENSMUSG00000029304	Spp1	protein_coding	5	104435118	secreted phosphoprotein 1	22332.7	-3.78646	0.430543	-6.47197	9.67303e-11	1.17517e-08
ENSMUSG00000054951	9130008F23Rik	protein_coding	17	40875482	RIKEN cDNA 9130008F23 gene	401.592	-2.34337	0.207872	-6.46247	1.0301e-10	1.24825e-08
ENSMUSG00000026764	Kif5c	protein_coding	2	49619298	kinesin family member 5C	1021.2	-3.22614	0.344609	-6.45989	1.04778e-10	1.26805e-08
ENSMUSG00000050511	Oprd1	protein_coding	4	132110726	opioid receptor, delta 1	47.3082	-3.79444	0.434572	-6.43033	1.2733e-10	1.52538e-08
ENSMUSG00000044337	Ackr3	protein_coding	1	90203980	atypical chemokine receptor 3	564.68	-3.25654	0.352686	-6.39815	1.57272e-10	1.86519e-08
ENSMUSG00000023829	Slc22a1	protein_coding	17	12648874	solute carrier family 22 (organic cation transporter), member 1	99.4238	-2.94276	0.303875	-6.39328	1.62367e-10	1.9208e-08
ENSMUSG00000047485	Klhl34	protein_coding	X	157818435	kelch-like 34	45.0222	-5.08333	0.638679	-6.3934	1.62239e-10	1.9208e-08
ENSMUSG00000026548	Slamf9	protein_coding	1	172475358	SLAM family member 9	207.71	-2.95323	0.30553	-6.39293	1.62734e-10	1.92275e-08
ENSMUSG00000024503	Spink1	protein_coding	18	43728069	serine peptidase inhibitor, Kazal type 1	18.8146	-7.39327	1.00549	-6.35838	2.03897e-10	2.37062e-08
ENSMUSG00000002565	Scin	protein_coding	12	40059769	scinderin	39.8765	-4.59956	0.567276	-6.34535	2.21924e-10	2.57074e-08
ENSMUSG00000087230	Mroh3	protein_coding	1	136181652	maestro heat-like repeat family member 3	79.3407	-2.99643	0.31474	-6.34309	2.252e-10	2.60231e-08
ENSMUSG00000000296	Tpd52l1	protein_coding	10	31332376	tumor protein D52-like 1	152.558	-3.36729	0.373361	-6.34047	2.2906e-10	2.64237e-08
ENSMUSG00000037124	Trim58	protein_coding	11	58640465	tripartite motif-containing 58	46.7509	-4.47764	0.549685	-6.32662	2.50597e-10	2.87822e-08
ENSMUSG00000048905	4930539E08Rik	protein_coding	17	28896397	RIKEN cDNA 4930539E08 gene	181.982	-3.15672	0.341242	-6.3202	2.61229e-10	2.99306e-08
ENSMUSG00000066682	Pilrb2	protein_coding	5	137865827	paired immunoglobin-like type 2 receptor beta 2	35.1652	-5.31512	0.682857	-6.31921	2.62909e-10	3.00867e-08
ENSMUSG00000107248	Gm43851	lincRNA	5	33436625	predicted gene 43851	14.5465	-7.10822	0.966967	-6.31689	2.66882e-10	3.05045e-08
ENSMUSG00000086503	Xist	lincRNA	X	103460375	inactive X specific transcripts	10350.9	-9.95272	1.41751	-6.31579	2.68787e-10	3.06852e-08
ENSMUSG00000037995	Igsf9	protein_coding	1	172481788	immunoglobulin superfamily, member 9	2969.96	-2.57794	0.250183	-6.30715	2.84226e-10	3.24087e-08
ENSMUSG00000074240	Cib3	protein_coding	8	72204335	calcium and integrin binding family member 3	62.5942	-4.1487	0.499309	-6.30611	2.86141e-10	3.25877e-08
ENSMUSG00000043705	Capn13	protein_coding	17	73306464	calpain 13	38.5071	-7.18959	0.982063	-6.30264	2.9262e-10	3.32855e-08
ENSMUSG00000013338	Fer1l4	protein_coding	2	156019139	fer-1-like 4 (C. elegans)	1993.62	-3.93255	0.465409	-6.30102	2.95687e-10	3.35941e-08
ENSMUSG00000022026	Olfm4	protein_coding	14	80000302	olfactomedin 4	353.006	-5.87623	0.775078	-6.29128	3.14869e-10	3.55599e-08
ENSMUSG00000027737	Slc7a11	protein_coding	3	49892526	solute carrier family 7 (cationic amino acid transporter, y+ system), member 11	413.583	-3.25568	0.358647	-6.28941	3.18672e-10	3.59037e-08
ENSMUSG00000034463	Scara3	protein_coding	14	65919394	scavenger receptor class A, member 3	9994.69	-3.46034	0.39127	-6.28811	3.21363e-10	3.61638e-08
ENSMUSG00000103421	Golt1a	protein_coding	1	133309800	golgi transport 1A	85.6227	-2.76529	0.28178	-6.2648	3.73295e-10	4.16612e-08
ENSMUSG00000038910	Plcl2	protein_coding	17	50509547	phospholipase C-like 2	178.203	-2.80384	0.287987	-6.26362	3.76151e-10	4.19305e-08
ENSMUSG00000024697	Gna14	protein_coding	19	16435667	guanine nucleotide binding protein, alpha 14	83.3347	-3.63959	0.421741	-6.25879	3.87972e-10	4.31465e-08
ENSMUSG00000029832	Nfe2l3	protein_coding	6	51432670	nuclear factor, erythroid derived 2, like 3	214.621	-2.66156	0.26549	-6.25847	3.88765e-10	4.3184e-08
ENSMUSG00000015962	1700016C15Rik	protein_coding	1	177729814	RIKEN cDNA 1700016C15 gene	24.7626	-4.16596	0.506667	-6.24861	4.14123e-10	4.58393e-08
ENSMUSG00000021640	Naip1	protein_coding	13	100407764	NLR family, apoptosis inhibitory protein 1	38.9782	-3.18842	0.350418	-6.24519	4.23291e-10	4.67447e-08
ENSMUSG00000039699	Batf2	protein_coding	19	6140983	basic leucine zipper transcription factor, ATF-like 2	145.789	-3.84373	0.45818	-6.20657	5.41531e-10	5.90444e-08
ENSMUSG00000074006	Omp	protein_coding	7	98143359	olfactory marker protein	83.7533	-2.21741	0.196354	-6.20009	5.64313e-10	6.13869e-08
ENSMUSG00000021208	Ifi27l2b	protein_coding	12	103450898	interferon, alpha-inducible protein 27 like 2B	909.23	-3.59423	0.418659	-6.19652	5.77238e-10	6.27208e-08
ENSMUSG00000048442	Smim5	protein_coding	11	115899966	small integral membrane protein 5	62.3542	-3.79777	0.453192	-6.17348	6.68041e-10	7.22553e-08
ENSMUSG00000029095	Ablim2	protein_coding	5	35757880	actin-binding LIM protein 2	159.473	-2.6204	0.262623	-6.17005	6.82703e-10	7.37569e-08
ENSMUSG00000020865	Abcc3	protein_coding	11	94343295	ATP-binding cassette, sub-family C (CFTR/MRP), member 3	9225.32	-2.15038	0.186505	-6.16809	6.91187e-10	7.45883e-08
ENSMUSG00000060317	Acnat2	protein_coding	4	49379840	acyl-coenzyme A amino acid N-acyltransferase 2	32.3982	-6.19043	0.84178	-6.16602	7.00315e-10	7.54014e-08
ENSMUSG00000027463	Slc52a3	protein_coding	2	151996511	solute carrier protein family 52, member 3	635.29	-2.94491	0.315487	-6.16479	7.05745e-10	7.58997e-08
ENSMUSG00000023057	Fabp2	protein_coding	3	122895072	fatty acid binding protein 2, intestinal	17.3579	-7.16412	1.00286	-6.14653	7.9196e-10	8.45949e-08
ENSMUSG00000023987	Pgc	protein_coding	17	47726842	progastricsin (pepsinogen C)	3864.67	-3.68273	0.439572	-6.10305	1.04063e-09	1.09917e-07
ENSMUSG00000028073	Pear1	protein_coding	3	87747890	platelet endothelial aggregation receptor 1	1221.37	-2.42842	0.234307	-6.09638	1.08497e-09	1.14217e-07
ENSMUSG00000025854	Fam20c	protein_coding	5	138754514	family with sequence similarity 20, member C	615.661	-2.19486	0.196961	-6.06651	1.30718e-09	1.36096e-07
ENSMUSG00000063727	Tnfrsf11b	protein_coding	15	54250619	tumor necrosis factor receptor superfamily, member 11b (osteoprotegerin)	911.615	-4.537	0.584706	-6.04919	1.45571e-09	1.50732e-07
ENSMUSG00000045664	Cdc42ep2	protein_coding	19	5917556	CDC42 effector protein (Rho GTPase binding) 2	233.159	-2.45737	0.24249	-6.01003	1.85491e-09	1.89405e-07
ENSMUSG00000030616	Sytl2	protein_coding	7	90302252	synaptotagmin-like 2	3932.19	-2.96665	0.327767	-6.00015	1.97139e-09	2.004e-07
ENSMUSG00000015653	Steap2	protein_coding	5	5664829	six transmembrane epithelial antigen of prostate 2	920.479	-3.0833	0.348143	-5.98404	2.17665e-09	2.19381e-07
ENSMUSG00000015652	Steap1	protein_coding	5	5736317	six transmembrane epithelial antigen of the prostate 1	77.5089	-4.27725	0.547917	-5.98129	2.21383e-09	2.22417e-07
ENSMUSG00000024972	Lgals12	protein_coding	19	7596660	lectin, galactose binding, soluble 12	297.918	-3.25878	0.380814	-5.93146	3.00256e-09	3.00066e-07
ENSMUSG00000006360	Crip1	protein_coding	12	113146316	cysteine-rich protein 1 (intestinal)	3102.56	-2.19984	0.202488	-5.9255	3.11349e-09	3.10824e-07
ENSMUSG00000046449	C77370	protein_coding	X	104077434	expressed sequence C77370	432.602	-3.74129	0.464427	-5.90251	3.58004e-09	3.55152e-07
ENSMUSG00000016150	Tenm1	protein_coding	X	42527866	teneurin transmembrane protein 1	87.1254	-3.34509	0.39754	-5.89902	3.65661e-09	3.62368e-07
ENSMUSG00000054598	9130230L23Rik	protein_coding	5	65979358	RIKEN cDNA 9130230L23 gene	118.871	-2.08404	0.183858	-5.89605	3.72309e-09	3.6857e-07
ENSMUSG00000031934	Panx1	protein_coding	9	15002128	pannexin 1	366.041	-2.32651	0.226285	-5.86211	4.57035e-09	4.45456e-07
ENSMUSG00000046460	Sh2d7	protein_coding	9	54538984	SH2 domain containing 7	128.325	-6.59932	0.957114	-5.85021	4.90947e-09	4.77036e-07
ENSMUSG00000064254	Ethe1	protein_coding	7	24587543	ethylmalonic encephalopathy 1	667.873	-2.19394	0.204533	-5.83742	5.30154e-09	5.13549e-07
ENSMUSG00000038515	Grtp1	protein_coding	8	13172022	GH regulated TBC protein 1	579.85	-2.95407	0.335032	-5.83248	5.46081e-09	5.27897e-07
ENSMUSG00000046213	Cym	protein_coding	3	107211293	chymosin	4211.37	-6.75391	0.990074	-5.8116	6.18804e-09	5.93951e-07
ENSMUSG00000109973	Gm45397	lincRNA	7	137557112	predicted gene 45397	8.1095	-7.0675	1.04837	-5.78757	7.14105e-09	6.79487e-07
ENSMUSG00000033717	Adra2a	protein_coding	19	54045182	adrenergic receptor, alpha 2a	123.752	-3.50645	0.433228	-5.78552	7.22883e-09	6.86884e-07
ENSMUSG00000039349	C130074G19Rik	protein_coding	1	184871926	RIKEN cDNA C130074G19 gene	2426.19	-2.59337	0.275843	-5.77638	7.63255e-09	7.23792e-07
ENSMUSG00000020682	Mmp28	protein_coding	11	83440768	matrix metallopeptidase 28 (epilysin)	296.822	-3.83656	0.492221	-5.76277	8.2744e-09	7.82307e-07
ENSMUSG00000022376	Adcy8	protein_coding	15	64699042	adenylate cyclase 8	19.0944	-4.26065	0.566307	-5.75774	8.52496e-09	8.03588e-07
ENSMUSG00000024215	Spdef	protein_coding	17	27714352	SAM pointed domain containing ets transcription factor	756.54	-2.72615	0.300147	-5.75101	8.87109e-09	8.34553e-07
ENSMUSG00000054036	Olfr279	protein_coding	15	98492402	olfactory receptor 279	42.6613	-3.13639	0.3718	-5.74609	9.13325e-09	8.55813e-07
ENSMUSG00000050530	Fam171a1	protein_coding	2	3114224	family with sequence similarity 171, member A1	451.205	-2.19046	0.207694	-5.73179	9.93738e-09	9.29322e-07
ENSMUSG00000024401	Tnf	protein_coding	17	35199381	tumor necrosis factor	820.933	-3.45868	0.428973	-5.73154	9.95205e-09	9.29775e-07
ENSMUSG00000028307	Aldob	protein_coding	4	49535995	aldolase B, fructose-bisphosphate	21.072	-6.94228	1.04198	-5.70286	1.17816e-08	1.09347e-06
ENSMUSG00000053477	Tcf4	protein_coding	18	69343356	transcription factor 4	724.982	-2.21436	0.21298	-5.70178	1.18559e-08	1.09897e-06
ENSMUSG00000054477	Kcnn2	protein_coding	18	45268860	potassium intermediate/small conductance calcium-activated channel, subfamily N, member 2	35.7726	-3.42209	0.425363	-5.69418	1.23964e-08	1.14682e-06
ENSMUSG00000028262	Clca3a2	protein_coding	3	144796559	chloride channel accessory 3A2	111.778	-4.25959	0.572489	-5.69372	1.24302e-08	1.14883e-06
ENSMUSG00000006369	Fbln1	protein_coding	15	85205949	fibulin 1	82.8921	-3.25142	0.395509	-5.69245	1.25227e-08	1.15624e-06
ENSMUSG00000038668	Lpar1	protein_coding	4	58435255	lysophosphatidic acid receptor 1	183.224	-4.45897	0.608329	-5.68601	1.30038e-08	1.19833e-06
ENSMUSG00000003279	Dlgap1	protein_coding	17	69969073	discs, large (Drosophila) homolog-associated protein 1	59.1811	-2.90389	0.335242	-5.67914	1.35374e-08	1.24266e-06
ENSMUSG00000032014	Oaf	protein_coding	9	43221235	out at first homolog	247.499	-3.00662	0.35333	-5.67918	1.35344e-08	1.24266e-06
ENSMUSG00000024526	Cidea	protein_coding	18	67343564	cell death-inducing DNA fragmentation factor, alpha subunit-like effector A	25.0678	-3.69349	0.479066	-5.62237	1.88353e-08	1.71073e-06
ENSMUSG00000029201	Ugdh	protein_coding	5	65413221	UDP-glucose dehydrogenase	1987.64	-2.11867	0.200041	-5.59221	2.24201e-08	2.01122e-06
ENSMUSG00000112189	AC079680.2	lincRNA	10	71170834		32.4225	-3.87431	0.513968	-5.59239	2.23967e-08	2.01122e-06
ENSMUSG00000055373	Fut9	protein_coding	4	25609332	fucosyltransferase 9	71.7306	-2.7973	0.322076	-5.58037	2.40012e-08	2.14695e-06
ENSMUSG00000020758	Itgb4	protein_coding	11	115974709	integrin beta 4	3314.62	-3.36287	0.42366	-5.57728	2.44311e-08	2.18128e-06
ENSMUSG00000041293	Adgrf1	protein_coding	17	43270329	adhesion G protein-coupled receptor F1	50.699	-3.79602	0.503304	-5.55532	2.77096e-08	2.46702e-06
ENSMUSG00000059668	Krt4	protein_coding	15	101918536	keratin 4	71.4317	-4.41284	0.617025	-5.53111	3.1821e-08	2.80927e-06
ENSMUSG00000057092	Fxyd3	protein_coding	7	31068172	FXYD domain-containing ion transport regulator 3	5471.7	-2.80135	0.327199	-5.50537	3.684e-08	3.22828e-06
ENSMUSG00000038295	Atg9b	protein_coding	5	24384181	autophagy related 9B	263.125	-2.96801	0.357814	-5.5001	3.79586e-08	3.31632e-06
ENSMUSG00000021185	9030617O03Rik	protein_coding	12	100779057	RIKEN cDNA 9030617O03 gene	314.621	-2.72556	0.314013	-5.49518	3.90317e-08	3.40144e-06
ENSMUSG00000047517	Dmbt1	protein_coding	7	131032053	deleted in malignant brain tumors 1	5736.25	-4.78479	0.689071	-5.4926	3.96059e-08	3.44513e-06
ENSMUSG00000025165	Sectm1a	protein_coding	11	121067407	secreted and transmembrane 1A	73.0728	-3.25492	0.411103	-5.48505	4.13344e-08	3.58232e-06
ENSMUSG00000027793	Ccna1	protein_coding	3	55045469	cyclin A1	16.1099	-5.70899	0.859597	-5.47813	4.29835e-08	3.72183e-06
ENSMUSG00000027314	Dll4	protein_coding	2	119325784	delta-like 4 (Drosophila)	245.24	-2.70142	0.310851	-5.47342	4.41428e-08	3.81523e-06
ENSMUSG00000015766	Eps8	protein_coding	6	137477245	epidermal growth factor receptor pathway substrate 8	1199.53	-3.33678	0.429177	-5.4448	5.18627e-08	4.44591e-06
ENSMUSG00000040891	Foxa3	protein_coding	7	19013284	forkhead box A3	433.7	-2.36082	0.250117	-5.44076	5.30548e-08	4.54399e-06
ENSMUSG00000074489	Bglap3	protein_coding	3	88368616	bone gamma-carboxyglutamate protein 3	11.6293	-3.72184	0.506065	-5.37844	7.51326e-08	6.33175e-06
ENSMUSG00000026700	Tnfsf4	protein_coding	1	161395409	tumor necrosis factor (ligand) superfamily, member 4	12.3283	-5.36188	0.812647	-5.3675	7.98377e-08	6.71034e-06
ENSMUSG00000027661	Slc2a10	protein_coding	2	165503787	solute carrier family 2 (facilitated glucose transporter), member 10	556.571	-2.89347	0.354124	-5.34691	8.9469e-08	7.47338e-06
ENSMUSG00000020159	Gabrp	protein_coding	11	33550781	gamma-aminobutyric acid (GABA) A receptor, pi	1002.41	-3.58237	0.484668	-5.32813	9.92299e-08	8.21312e-06
ENSMUSG00000021464	Ror2	protein_coding	13	53109312	receptor tyrosine kinase-like orphan receptor 2	60.9812	-4.86827	0.726068	-5.32769	9.94671e-08	8.22146e-06
ENSMUSG00000078945	Naip2	protein_coding	13	100144063	NLR family, apoptosis inhibitory protein 2	993.97	-2.34905	0.253368	-5.32446	1.01254e-07	8.35453e-06
ENSMUSG00000040121	Rep15	protein_coding	6	147032584	RAB15 effector protein	626.802	-2.83625	0.345315	-5.31761	1.05142e-07	8.63769e-06
ENSMUSG00000035780	Ugt2a3	protein_coding	5	87324972	UDP glucuronosyltransferase 2 family, polypeptide A3	32.4167	-3.75483	0.518863	-5.30936	1.10013e-07	9.01436e-06
ENSMUSG00000028963	Uts2	protein_coding	4	150997097	urotensin 2	12.4127	-7.37932	1.20627	-5.28847	1.23345e-07	1.00546e-05
ENSMUSG00000043336	Filip1l	protein_coding	16	57353093	filamin A interacting protein 1-like	895.414	-2.36876	0.259235	-5.28002	1.29172e-07	1.04934e-05
ENSMUSG00000050944	Efcab5	protein_coding	11	77089915	EF-hand calcium binding domain 5	44.8533	-4.32775	0.631537	-5.26928	1.36959e-07	1.10785e-05
ENSMUSG00000037112	Sik2	protein_coding	9	50892801	salt inducible kinase 2	453.727	-1.93903	0.178742	-5.25356	1.49186e-07	1.20366e-05
ENSMUSG00000030263	Lrmp	protein_coding	6	145115653	lymphoid-restricted membrane protein	189.725	-3.04802	0.389959	-5.25189	1.50546e-07	1.2136e-05
ENSMUSG00000061132	Blnk	protein_coding	19	40928927	B cell linker	73.565	-3.12288	0.40697	-5.2163	1.82529e-07	1.46023e-05
ENSMUSG00000037999	Arap2	protein_coding	5	62602445	ArfGAP with RhoGAP domain, ankyrin repeat and PH domain 2	1147.47	-2.21029	0.232901	-5.19656	2.03008e-07	1.61859e-05
ENSMUSG00000030157	Clec2d	protein_coding	6	129180615	C-type lectin domain family 2, member d	405.56	-2.56436	0.301414	-5.19008	2.10209e-07	1.67178e-05
ENSMUSG00000035184	Fam124a	protein_coding	14	62555737	family with sequence similarity 124, member A	116.614	-4.52528	0.68279	-5.16306	2.42948e-07	1.91605e-05
ENSMUSG00000045288	Ush1g	protein_coding	11	115315192	USH1 protein network component sans	18.6135	-4.95796	0.769847	-5.14123	2.72946e-07	2.14015e-05
ENSMUSG00000022993	4930415O20Rik	protein_coding	15	98571004	RIKEN cDNA 4930415O20 gene	44.1759	-3.09826	0.408801	-5.13271	2.85596e-07	2.23563e-05
ENSMUSG00000022755	Adgrg7	protein_coding	16	56724609	adhesion G protein-coupled receptor G7	55.4593	-5.65887	0.909051	-5.12499	2.97558e-07	2.32351e-05
ENSMUSG00000112112	AC154300.1	lincRNA	12	45094012		51.0169	-2.92858	0.377236	-5.11242	3.18066e-07	2.47368e-05
ENSMUSG00000051079	Rgs13	protein_coding	1	144138654	regulator of G-protein signaling 13	37.8342	-4.86748	0.757153	-5.10792	3.25717e-07	2.52878e-05
ENSMUSG00000022324	Matn2	protein_coding	15	34306680	matrilin 2	195.09	-2.25739	0.247629	-5.07771	3.82014e-07	2.93695e-05
ENSMUSG00000035473	Galm	protein_coding	17	80127471	galactose mutarotase	703.689	-2.14191	0.224972	-5.07581	3.8585e-07	2.96163e-05
ENSMUSG00000025068	Gsto1	protein_coding	19	47854970	glutathione S-transferase omega 1	38517.5	-3.09289	0.413184	-5.06527	4.07828e-07	3.11516e-05
ENSMUSG00000029171	Pgm1	protein_coding	5	64092950	phosphoglucomutase 1	1014.69	-2.14684	0.227178	-5.04821	4.45959e-07	3.39e-05
ENSMUSG00000021868	Ppif	protein_coding	14	25694154	peptidylprolyl isomerase F (cyclophilin F)	997.806	-1.72283	0.143254	-5.04581	4.51593e-07	3.43008e-05
ENSMUSG00000030017	Reg3g	protein_coding	6	78466269	regenerating islet-derived 3 gamma	21.3871	-4.76961	0.756419	-4.9835	6.24452e-07	4.64974e-05
ENSMUSG00000029470	P2rx4	protein_coding	5	122707544	purinergic receptor P2X, ligand-gated ion channel 4	5455.92	-1.60396	0.121475	-4.97185	6.63187e-07	4.91496e-05
ENSMUSG00000038241	Cep250	protein_coding	2	155956458	centrosomal protein 250	1051.29	-1.93146	0.187342	-4.97196	6.62781e-07	4.91496e-05
ENSMUSG00000022096	Hr	protein_coding	14	70552212	hairless	777.694	-3.08892	0.420593	-4.96659	6.8139e-07	5.04591e-05
ENSMUSG00000019122	Ccl9	protein_coding	11	83572919	chemokine (C-C motif) ligand 9	197.608	-3.68236	0.541235	-4.95599	7.1962e-07	5.30411e-05
ENSMUSG00000071356	Reg3b	protein_coding	6	78370657	regenerating islet-derived 3 beta	9.30301	-6.50833	1.11173	-4.95473	7.24323e-07	5.33463e-05
ENSMUSG00000040413	Timd2	protein_coding	11	46668960	T cell immunoglobulin and mucin domain containing 2	14.0121	-3.29896	0.464107	-4.95351	7.28854e-07	5.36382e-05
ENSMUSG00000111555	CT485606.2	lincRNA	9	14335612		5.25853	-6.33265	1.08129	-4.93175	8.14973e-07	5.95131e-05
ENSMUSG00000018126	Baiap2l2	protein_coding	15	79258195	BAI1-associated protein 2-like 2	180.575	-3.8852	0.585534	-4.92746	8.33062e-07	6.07872e-05
ENSMUSG00000069662	Marcks	protein_coding	10	37133375	myristoylated alanine rich protein kinase C substrate	603	-2.38796	0.282674	-4.9101	9.10295e-07	6.61677e-05
ENSMUSG00000079174	Gm3054	lincRNA	5	137154029	predicted gene 3054	9.02687	-6.60732	1.14428	-4.90031	9.56843e-07	6.93913e-05
ENSMUSG00000019838	Slc16a10	protein_coding	10	40033532	solute carrier family 16 (monocarboxylic acid transporters), member 10	350.037	-2.86002	0.379902	-4.89604	9.77886e-07	7.08004e-05
ENSMUSG00000067750	Khdc1a	protein_coding	1	21349641	KH domain containing 1A	123.96	-6.344	1.09203	-4.89363	9.8992e-07	7.1516e-05
ENSMUSG00000033847	Pla2g4c	protein_coding	7	13324655	phospholipase A2, group IVC (cytosolic, calcium-independent)	382.64	-3.80169	0.575758	-4.86609	1.13825e-06	8.16659e-05
ENSMUSG00000025497	Cdhr5	protein_coding	7	141269083	cadherin-related family member 5	35.7108	-4.10485	0.640103	-4.85055	1.2312e-06	8.77419e-05
ENSMUSG00000060402	Chst8	protein_coding	7	34674468	carbohydrate (N-acetylgalactosamine 4-0) sulfotransferase 8	72.4715	-3.35948	0.486578	-4.84913	1.24006e-06	8.83064e-05
ENSMUSG00000039364	Sectm1b	protein_coding	11	121053458	secreted and transmembrane 1B	3489.07	-5.62305	0.954399	-4.84394	1.27289e-06	9.04404e-05
ENSMUSG00000021136	Smoc1	protein_coding	12	81026808	SPARC related modular calcium binding 1	344.789	-2.82767	0.377564	-4.8407	1.29385e-06	9.18602e-05
ENSMUSG00000015957	Wnt11	protein_coding	7	98835112	wingless-type MMTV integration site family, member 11	44.6069	-2.77904	0.367696	-4.83833	1.30934e-06	9.28156e-05
ENSMUSG00000078672	Mup20	protein_coding	4	62050234	major urinary protein 20	11.0109	-6.04683	1.04487	-4.83013	1.36447e-06	9.65847e-05
ENSMUSG00000033453	Adamts15	protein_coding	9	30899155	a disintegrin-like and metallopeptidase (reprolysin type) with thrombospondin type 1 motif, 15	105.999	-2.47522	0.305741	-4.82508	1.39946e-06	9.88397e-05
ENSMUSG00000033805	Ephx4	protein_coding	5	107402736	epoxide hydrolase 4	25.152	-4.38239	0.701565	-4.8212	1.42695e-06	0.000100631
ENSMUSG00000029847	Slc23a4	protein_coding	6	34945278	solute carrier family 23 member 4	53.4204	-2.95736	0.406417	-4.81612	1.46373e-06	0.000103148
ENSMUSG00000033256	Shf	protein_coding	2	122348892	Src homology 2 domain containing F	117.677	-2.77749	0.373026	-4.76506	1.88801e-06	0.000130711
ENSMUSG00000096956	Snhg18	lincRNA	15	32240565	small nucleolar RNA host gene 18	106.699	6.20361	1.09732	4.74209	2.11523e-06	0.000145908
ENSMUSG00000058435	Btnl4	protein_coding	17	34469042	butyrophilin-like 4	13.9711	-3.98655	0.630399	-4.73756	2.16306e-06	0.000148881
ENSMUSG00000033177	Tmprss7	protein_coding	16	45656315	transmembrane serine protease 7	10.6352	-5.42886	0.938915	-4.717	2.39351e-06	0.000164028
ENSMUSG00000038745	Nlrp6	protein_coding	7	140920902	NLR family, pyrin domain containing 6	19.9155	-4.44031	0.731113	-4.70558	2.53143e-06	0.000172728
ENSMUSG00000029780	Nt5c3	protein_coding	6	56882400	5'-nucleotidase, cytosolic III	1334.78	-1.90704	0.192873	-4.70277	2.56655e-06	0.000174999
ENSMUSG00000061947	Serpina10	protein_coding	12	103614786	serine (or cysteine) peptidase inhibitor, clade A (alpha-1 antiproteinase, antitrypsin), member 10	174.874	-3.53577	0.53952	-4.70005	2.60098e-06	0.000177219
ENSMUSG00000030747	Dgat2	protein_coding	7	99153658	diacylglycerol O-acyltransferase 2	702.976	-3.04244	0.434903	-4.69631	2.64897e-06	0.0001801
ENSMUSG00000021983	Atp8a2	protein_coding	14	59638540	ATPase, aminophospholipid transporter-like, class I, type 8A, member 2	511.389	-3.5282	0.540428	-4.67814	2.89484e-06	0.000195551
ENSMUSG00000028716	Pdzk1ip1	protein_coding	4	115088708	PDZK1 interacting protein 1	5034.95	-2.41413	0.303553	-4.65859	3.18381e-06	0.000213699
ENSMUSG00000031709	Tbc1d9	protein_coding	8	83165352	TBC1 domain family, member 9	840.581	-2.76577	0.379344	-4.65479	3.24304e-06	0.000217159
ENSMUSG00000075420	Smim6	protein_coding	11	115912017	small integral membrane protein 6	1309.36	-2.98627	0.427625	-4.64489	3.4025e-06	0.00022677
ENSMUSG00000048337	Npy4r	protein_coding	14	34143992	neuropeptide Y receptor Y4	15.9294	-3.78286	0.600252	-4.63615	3.5495e-06	0.000236068
ENSMUSG00000032719	Sbspon	protein_coding	1	15853862	somatomedin B and thrombospondin, type 1 domain containing	78.5735	-6.2703	1.14033	-4.62173	3.80558e-06	0.000251158
ENSMUSG00000036136	Fam110c	protein_coding	12	31073861	family with sequence similarity 110, member C	783.905	-1.59578	0.128949	-4.62027	3.83243e-06	0.000252401
ENSMUSG00000052609	Plekhg3	protein_coding	12	76530891	pleckstrin homology domain containing, family G (with RhoGef domain) member 3	1155.88	-2.49797	0.325249	-4.60562	4.11238e-06	0.000269526
ENSMUSG00000032278	Paqr5	protein_coding	9	61953481	progestin and adipoQ receptor family member V	1096.98	-2.49799	0.325673	-4.59967	4.23156e-06	0.000277145
ENSMUSG00000063838	Cdc42ep5	protein_coding	7	4151260	CDC42 effector protein (Rho GTPase binding) 5	1074.03	-2.25889	0.274588	-4.58466	4.54727e-06	0.000296387
ENSMUSG00000029671	Wnt16	protein_coding	6	22288227	wingless-type MMTV integration site family, member 16	22.5861	-4.78659	0.827684	-4.57493	4.76388e-06	0.00030944
ENSMUSG00000026149	Tm4sf20	protein_coding	1	82756649	transmembrane 4 L six family member 20	36.677	-3.82487	0.619097	-4.56289	5.04541e-06	0.000326383
ENSMUSG00000038264	Sema7a	protein_coding	9	57940112	sema domain, immunoglobulin domain (Ig), and GPI membrane anchor, (semaphorin) 7A	328.983	-2.12637	0.24822	-4.53781	5.68402e-06	0.000364455
ENSMUSG00000039621	Prex1	protein_coding	2	166566342	phosphatidylinositol-3,4,5-trisphosphate-dependent Rac exchange factor 1	294.464	-2.60524	0.354132	-4.53288	5.81841e-06	0.000372315
ENSMUSG00000041774	Ydjc	protein_coding	16	17144621	YdjC homolog (bacterial)	191.106	-1.91679	0.202382	-4.53001	5.89818e-06	0.00037691
ENSMUSG00000020105	Lrig3	protein_coding	10	125966168	leucine-rich repeats and immunoglobulin-like domains 3	1282.72	-3.43407	0.537343	-4.52982	5.90341e-06	0.000376983
ENSMUSG00000061517	Sox21	protein_coding	14	118233232	SRY (sex determining region Y)-box 21	60.0064	-3.09944	0.46453	-4.5195	6.19867e-06	0.000394249
ENSMUSG00000038843	Gcnt1	protein_coding	19	17326141	glucosaminyl (N-acetyl) transferase 1, core 2	213.776	-2.47022	0.32633	-4.50532	6.62717e-06	0.000419809
ENSMUSG00000021792	Fam213a	protein_coding	14	40993740	family with sequence similarity 213, member A	7463.13	-1.85668	0.190473	-4.49766	6.87069e-06	0.000433948
ENSMUSG00000027562	Car2	protein_coding	3	14886273	carbonic anhydrase 2	6785.28	-2.79665	0.400123	-4.49025	7.11407e-06	0.000448552
ENSMUSG00000090588	Gm9573	protein_coding	17	35617923	predicted gene 9573	10.0947	-6.08031	1.13249	-4.48597	7.25834e-06	0.000456431
ENSMUSG00000022445	Cyp2d26	protein_coding	15	82790107	cytochrome P450, family 2, subfamily d, polypeptide 26	34.6724	-5.1168	0.923903	-4.45588	8.35501e-06	0.000520895
ENSMUSG00000024975	Pdcd4	protein_coding	19	53892231	programmed cell death 4	1421.47	-2.23627	0.277699	-4.45181	8.5148e-06	0.00052981
ENSMUSG00000022596	Slurp1	protein_coding	15	74724318	secreted Ly6/Plaur domain containing 1	18.4244	-3.33158	0.524429	-4.44595	8.75055e-06	0.000543407
ENSMUSG00000032015	Pou2f3	protein_coding	9	43123939	POU domain, class 2, transcription factor 3	69.06	-3.62968	0.591621	-4.44488	8.79422e-06	0.000545761
ENSMUSG00000039942	Ptger4	protein_coding	15	5206661	prostaglandin E receptor 4 (subtype EP4)	453.59	-2.38092	0.311174	-4.43778	9.08895e-06	0.000563312
ENSMUSG00000063296	Tmem117	protein_coding	15	94629185	transmembrane protein 117	141.275	-3.03395	0.458619	-4.43493	9.21015e-06	0.000569705
ENSMUSG00000036960	Clca2	protein_coding	3	145070263	chloride channel accessory 2	12.0204	-4.41388	0.772491	-4.41931	9.90156e-06	0.000610081
ENSMUSG00000017211	Gsdma2	protein_coding	11	98646759	gasdermin A2	23.4895	-4.09419	0.700779	-4.41535	1.00847e-05	0.000620152
ENSMUSG00000024998	Plce1	protein_coding	19	38481109	phospholipase C, epsilon 1	1180.76	-1.977	0.222155	-4.39783	1.0934e-05	0.000668901
ENSMUSG00000000983	Wfdc18	protein_coding	11	83709015	WAP four-disulfide core domain 18	45.0432	-5.28333	0.980868	-4.36687	1.26037e-05	0.000764624
ENSMUSG00000018623	Mmp7	protein_coding	9	7692090	matrix metallopeptidase 7	53.6236	-5.76517	1.09393	-4.35602	1.32448e-05	0.000801978
ENSMUSG00000046768	Rhoj	protein_coding	12	75308322	ras homolog family member J	163.767	-3.16819	0.498572	-4.3488	1.36883e-05	0.000825106
ENSMUSG00000071178	Serpina1b	protein_coding	12	103728156	serine (or cysteine) preptidase inhibitor, clade A, member 1B	50.962	-4.77657	0.870638	-4.3377	1.43981e-05	0.000864618
ENSMUSG00000040430	Pitpnc1	protein_coding	11	107207892	phosphatidylinositol transfer protein, cytoplasmic 1	286.865	-1.90965	0.209967	-4.33234	1.4753e-05	0.000884248
ENSMUSG00000028463	Car9	protein_coding	4	43506966	carbonic anhydrase 9	153.865	-2.90726	0.440332	-4.3314	1.48162e-05	0.000887473
ENSMUSG00000017144	Rnd3	protein_coding	2	51130438	Rho family GTPase 3	1641.16	-2.04328	0.241117	-4.32686	1.51252e-05	0.000904261
ENSMUSG00000029321	Slc10a6	protein_coding	5	103605711	solute carrier family 10 (sodium/bile acid cotransporter family), member 6	226.664	3.66741	0.617272	4.32129	1.55122e-05	0.000922734
ENSMUSG00000021280	Exoc3l4	protein_coding	12	111417017	exocyst complex component 3-like 4	104.415	-2.67715	0.388624	-4.31561	1.59165e-05	0.000943822
ENSMUSG00000027875	Hmgcs2	protein_coding	3	98280435	3-hydroxy-3-methylglutaryl-Coenzyme A synthase 2	2677.65	-4.65604	0.847251	-4.31518	1.59473e-05	0.000945057
ENSMUSG00000041688	Amot	protein_coding	X	145446425	angiomotin	994.641	-2.24885	0.291038	-4.29103	1.77849e-05	0.0010435
ENSMUSG00000008193	Spib	protein_coding	7	44525993	Spi-B transcription factor (Spi-1/PU.1 related)	130.958	-2.95902	0.457538	-4.28167	1.855e-05	0.00108368
ENSMUSG00000062563	Cys1	protein_coding	12	24665833	cystin 1	61.1276	-3.38516	0.557182	-4.28075	1.86266e-05	0.00108749
ENSMUSG00000058254	Tspan7	protein_coding	X	10485158	tetraspanin 7	664.708	-1.76636	0.179943	-4.25893	2.0541e-05	0.00118826
ENSMUSG00000033268	Duox1	protein_coding	2	122315672	dual oxidase 1	50.9076	-6.56718	1.30857	-4.25439	2.0962e-05	0.00120966
ENSMUSG00000020186	Csrp2	protein_coding	10	110919789	cysteine and glycine-rich protein 2	1093.37	-3.21722	0.525291	-4.22094	2.43281e-05	0.0013883
ENSMUSG00000063011	Msln	protein_coding	17	25748614	mesothelin	5339.65	-2.92384	0.458126	-4.19937	2.67664e-05	0.00151778
ENSMUSG00000022037	Clu	protein_coding	14	65968483	clusterin	522117	-2.31619	0.313772	-4.19472	2.73213e-05	0.00154554
ENSMUSG00000023064	Sncg	protein_coding	14	34370274	synuclein, gamma	12.4063	-4.32889	0.79385	-4.19335	2.74865e-05	0.00155303
ENSMUSG00000057191	AB124611	protein_coding	9	21526176	cDNA sequence AB124611	62.1672	-2.61289	0.384949	-4.18988	2.79105e-05	0.00157416
ENSMUSG00000074207	Adh1	protein_coding	3	138260991	alcohol dehydrogenase 1 (class I)	452.737	-3.24611	0.539643	-4.16222	3.15172e-05	0.00176288
ENSMUSG00000056413	Adap1	protein_coding	5	139271876	ArfGAP with dual PH domains 1	643.994	-1.87548	0.210768	-4.15378	3.27026e-05	0.00182487
ENSMUSG00000041460	Cacna2d4	protein_coding	6	119236526	calcium channel, voltage-dependent, alpha 2/delta subunit 4	74.438	-2.09238	0.26368	-4.14284	3.4303e-05	0.00190183
ENSMUSG00000022040	Ephx2	protein_coding	14	66084374	epoxide hydrolase 2, cytoplasmic	602.937	-2.77013	0.427712	-4.13859	3.49444e-05	0.001934
ENSMUSG00000020607	Fam84a	protein_coding	12	14146830	family with sequence similarity 84, member A	372.623	-2.72926	0.418165	-4.13535	3.54408e-05	0.00195804
ENSMUSG00000040249	Lrp1	protein_coding	10	127538161	low density lipoprotein receptor-related protein 1	2435.13	-2.04005	0.251536	-4.13481	3.55241e-05	0.00196035
ENSMUSG00000028654	Mycl	protein_coding	4	122995652	v-myc avian myelocytomatosis viral oncogene lung carcinoma derived	169.325	-2.23107	0.297744	-4.13467	3.55469e-05	0.00196046
ENSMUSG00000066684	Pilrb1	protein_coding	5	137852147	paired immunoglobin-like type 2 receptor beta 1	17.7488	-3.00794	0.486459	-4.12766	3.66469e-05	0.00201175
ENSMUSG00000020182	Ddc	protein_coding	11	11814101	dopa decarboxylase	133.459	-2.9622	0.475502	-4.1266	3.68168e-05	0.00201991
ENSMUSG00000009246	Trpm5	protein_coding	7	143069153	transient receptor potential cation channel, subfamily M, member 5	223.894	-2.92424	0.466849	-4.12176	3.75987e-05	0.00205566
ENSMUSG00000045348	Nyap1	protein_coding	5	137729899	neuronal tyrosine-phosphorylated phosphoinositide 3-kinase adaptor 1	81.2881	-2.05459	0.256521	-4.11114	3.9371e-05	0.00214389
ENSMUSG00000067229	Cyp2c66	protein_coding	19	39113898	cytochrome P450, family 2, subfamily c, polypeptide 66	9.73478	-6.68379	1.38301	-4.10972	3.96137e-05	0.00215586
ENSMUSG00000040136	Abcc8	protein_coding	7	46104523	ATP-binding cassette, sub-family C (CFTR/MRP), member 8	283.333	-3.24456	0.549195	-4.08699	4.36998e-05	0.00237277
ENSMUSG00000020902	Ntn1	protein_coding	11	68209364	netrin 1	311.561	-2.75689	0.431083	-4.07552	4.59123e-05	0.00248436
ENSMUSG00000020178	Adora2a	protein_coding	10	75316877	adenosine A2a receptor	30.7729	-2.83388	0.450096	-4.07442	4.61284e-05	0.0024932
ENSMUSG00000003051	Elf3	protein_coding	1	135253575	E74-like factor 3	10066.2	-1.90855	0.223124	-4.07195	4.66212e-05	0.00251696
ENSMUSG00000053783	1700016K19Rik	protein_coding	11	75999912	RIKEN cDNA 1700016K19 gene	13.6112	-3.41419	0.594751	-4.05916	4.9249e-05	0.00264976
ENSMUSG00000026527	Rgs7	protein_coding	1	175059087	regulator of G protein signaling 7	12.644	-4.65127	0.901151	-4.05179	5.0828e-05	0.00272542
ENSMUSG00000035105	Egln3	protein_coding	12	54178981	egl-9 family hypoxia-inducible factor 3	346.057	-3.34752	0.580524	-4.04379	5.25932e-05	0.0028121
ENSMUSG00000031725	Ces1f	protein_coding	8	93256236	carboxylesterase 1F	48.0841	-3.83165	0.701937	-4.03405	5.48248e-05	0.00291659
ENSMUSG00000033192	Lpcat2	protein_coding	8	92855339	lysophosphatidylcholine acyltransferase 2	220.064	-2.24515	0.308725	-4.03321	5.50196e-05	0.00292531
ENSMUSG00000032741	Tpcn1	protein_coding	5	120534153	two pore channel 1	1048.65	-1.50596	0.125678	-4.02582	5.67783e-05	0.00301543
ENSMUSG00000022829	Stxbp5l	protein_coding	16	37114942	syntaxin binding protein 5-like	26.9464	-3.40301	0.597151	-4.02413	5.71869e-05	0.00303203
ENSMUSG00000090061	Nwd2	protein_coding	5	63649102	NACHT and WD repeat domain containing 2	23.4365	-2.82219	0.453268	-4.02013	5.81669e-05	0.00307991
ENSMUSG00000029153	Ociad2	protein_coding	5	73322199	OCIA domain containing 2	3506.28	-1.66889	0.166438	-4.01883	5.84877e-05	0.0030906
ENSMUSG00000072674	Plac9b	protein_coding	14	26167405	placenta specific 9b	186.316	-3.74205	0.68318	-4.01366	5.97855e-05	0.0031528
ENSMUSG00000098053	Gm27033	lincRNA	5	147280720	predicted gene, 27033	5.57469	-5.38907	1.09362	-4.01333	5.9867e-05	0.00315468
ENSMUSG00000036027	1810046K07Rik	protein_coding	9	51289686	RIKEN cDNA 1810046K07 gene	28.9717	-4.35965	0.838573	-4.00639	6.16536e-05	0.00323981
ENSMUSG00000070563	Spaca4	protein_coding	7	45725107	sperm acrosome associated 4	57.5143	-2.01291	0.253401	-3.99727	6.40769e-05	0.00335226
ENSMUSG00000087265	Gm12349	lincRNA	11	100291671	predicted gene 12349	12.7617	-3.05976	0.517616	-3.97933	6.91111e-05	0.00359575
ENSMUSG00000048537	Phldb1	protein_coding	9	44686304	pleckstrin homology like domain, family B, member 1	1017.34	-1.82622	0.207667	-3.97858	6.93274e-05	0.00360503
ENSMUSG00000021749	Oit1	protein_coding	14	8348937	oncoprotein induced transcript 1	2670.33	-2.43012	0.360199	-3.97035	7.17658e-05	0.0037216
ENSMUSG00000111528	AC145731.3	lincRNA	9	120879697		13.642	-2.86705	0.471628	-3.95873	7.53488e-05	0.00389118
ENSMUSG00000020646	Mboat2	protein_coding	12	24830879	membrane bound O-acyltransferase domain containing 2	299.779	-2.58463	0.400329	-3.95832	7.54774e-05	0.00389487
ENSMUSG00000029603	Dtx1	protein_coding	5	120680202	deltex 1, E3 ubiquitin ligase	18.9015	-3.10824	0.533762	-3.94978	7.8222e-05	0.00402333
ENSMUSG00000021759	Plpp1	protein_coding	13	112800792	phospholipid phosphatase 1	159.423	-1.69622	0.176292	-3.94928	7.8388e-05	0.00402968
ENSMUSG00000022323	Rida	protein_coding	15	34484021	reactive intermediate imine deaminase A homolog	1062.7	-1.69482	0.176234	-3.94259	8.06067e-05	0.004137
ENSMUSG00000062007	Hsh2d	protein_coding	8	72189638	hematopoietic SH2 domain containing	211.71	-1.9376	0.238	-3.93949	8.16533e-05	0.0041839
ENSMUSG00000020303	Stc2	protein_coding	11	31357307	stanniocalcin 2	203.816	-3.40551	0.612352	-3.92831	8.5544e-05	0.00436907
ENSMUSG00000031980	Agt	protein_coding	8	124556534	angiotensinogen (serpin peptidase inhibitor, clade A, member 8)	37.397	-3.48692	0.633448	-3.92601	8.63673e-05	0.00440874
ENSMUSG00000070643	Sox13	protein_coding	1	133382303	SRY (sex determining region Y)-box 13	848.858	-1.64116	0.163455	-3.92255	8.76183e-05	0.00446537
ENSMUSG00000037280	Galnt6	protein_coding	15	100691813	UDP-N-acetyl-alpha-D-galactosamine:polypeptide N-acetylgalactosaminyltransferase 6	713.31	-2.1041	0.281594	-3.92089	8.8221e-05	0.00449367
ENSMUSG00000022525	Hrasls	protein_coding	16	29209695	HRAS-like suppressor	8.94623	-3.13987	0.54756	-3.90801	9.30599e-05	0.00470721
ENSMUSG00000110663	Gm39157	lincRNA	8	33985914	predicted gene, 39157	16.6864	-2.74146	0.446511	-3.90015	9.61334e-05	0.00485748
ENSMUSG00000034112	Atp2c2	protein_coding	8	119700009	ATPase, Ca++ transporting, type 2C, member 2	620.182	-2.7401	0.447965	-3.88446	0.000102557	0.00515182
ENSMUSG00000022057	Adamdec1	protein_coding	14	68563380	ADAM-like, decysin 1	28.5003	-3.84967	0.733965	-3.88257	0.000103359	0.0051866
ENSMUSG00000032099	Pate4	protein_coding	9	35607093	prostate and testis expressed 4	14.848	-3.97355	0.767553	-3.87406	0.000107036	0.00535408
ENSMUSG00000056050	Mia3	protein_coding	1	183326725	melanoma inhibitory activity 3	2820.97	-1.44268	0.114631	-3.86173	0.000112587	0.00560507
ENSMUSG00000022705	Drd3	protein_coding	16	43762221	dopamine receptor D3	4.56116	-5.18554	1.08649	-3.85235	0.000116988	0.00580582
ENSMUSG00000039431	Mtmr7	protein_coding	8	40551095	myotubularin related protein 7	271.661	-2.34716	0.35112	-3.83673	0.000124682	0.00616185
ENSMUSG00000044628	Rnf208	protein_coding	2	25242255	ring finger protein 208	96.448	-2.45691	0.380878	-3.82513	0.000130703	0.00642915
ENSMUSG00000024386	Proc	protein_coding	18	32123129	protein C	112.853	-3.05806	0.539177	-3.81704	0.000135064	0.00662649
ENSMUSG00000028194	Ddah1	protein_coding	3	145758675	dimethylarginine dimethylaminohydrolase 1	374.354	-2.41591	0.371435	-3.81202	0.000137838	0.00675558
ENSMUSG00000074274	D930028M14Rik	lincRNA	7	25152457	RIKEN cDNA D930028M14 gene	6.42061	-4.09832	0.814979	-3.80172	0.000143697	0.00701729
ENSMUSG00000067006	Serpinb5	protein_coding	1	106861173	serine (or cysteine) peptidase inhibitor, clade B, member 5	1102.45	-2.33281	0.350757	-3.79982	0.000144799	0.00706017
ENSMUSG00000046804	Phgr1	protein_coding	2	118772769	proline/histidine/glycine-rich 1	561.475	-2.91975	0.505456	-3.79805	0.000145837	0.00710345
ENSMUSG00000002233	Rhoc	protein_coding	3	104788375	ras homolog family member C	1470.76	-1.79923	0.210915	-3.78935	0.00015104	0.00732672
ENSMUSG00000021379	Id4	protein_coding	13	48261228	inhibitor of DNA binding 4	32.7419	-2.81499	0.479219	-3.78739	0.000152237	0.00736966
ENSMUSG00000054161	Fam83e	protein_coding	7	45721212	family with sequence similarity 83, member E	2418.27	-1.75476	0.200076	-3.77237	0.000161707	0.0077962
ENSMUSG00000000567	Sox9	protein_coding	11	112782224	SRY (sex determining region Y)-box 9	760.537	-3.92068	0.774999	-3.76863	0.000164148	0.00789552
ENSMUSG00000057454	Lypd3	protein_coding	7	24636550	Ly6/Plaur domain containing 3	13.2672	-2.78852	0.476929	-3.75008	0.00017678	0.00843696
ENSMUSG00000055415	Atp10b	protein_coding	11	43149877	ATPase, class V, type 10B	957.157	-3.27442	0.607071	-3.74654	0.00017929	0.00854048
ENSMUSG00000021773	Comtd1	protein_coding	14	21845855	catechol-O-methyltransferase domain containing 1	174.31	-1.89036	0.237868	-3.74308	0.000181775	0.00864483
ENSMUSG00000049892	Rasd1	protein_coding	11	59963181	RAS, dexamethasone-induced 1	285.014	2.85781	0.496455	3.74215	0.000182449	0.00867254
ENSMUSG00000068617	Efcab1	protein_coding	16	14906637	EF-hand calcium binding domain 1	18.2279	-4.64875	0.978495	-3.72894	0.000192286	0.00912177
ENSMUSG00000114061	AC124537.2	lincRNA	13	35027354		5.44575	-4.99843	1.07264	-3.72766	0.00019327	0.00916385
ENSMUSG00000031298	Adgrg2	protein_coding	X	160390690	adhesion G protein-coupled receptor G2	147.379	-2.03247	0.277221	-3.72435	0.000195822	0.0092802
ENSMUSG00000114743	AC165260.5	lincRNA	13	59235750		4.58125	-4.71609	0.9996	-3.71758	0.000201141	0.00951798
ENSMUSG00000030790	Adm	protein_coding	7	110627661	adrenomedullin	39.301	-2.39253	0.375307	-3.71039	0.000206941	0.00976316
ENSMUSG00000020181	Nav3	protein_coding	10	109681259	neuron navigator 3	32.4459	-3.44445	0.659016	-3.70924	0.000207882	0.00979778
ENSMUSG00000006219	Fblim1	protein_coding	4	141576062	filamin binding LIM protein 1	1025.67	-1.73759	0.199132	-3.704	0.000212223	0.00997754
ENSMUSG00000074882	Cyp2c68	protein_coding	19	39688834	cytochrome P450, family 2, subfamily c, polypeptide 68	22.4438	-4.21667	0.868404	-3.70412	0.000212125	0.00997754
ENSMUSG00000040037	Negr1	protein_coding	3	156561794	neuronal growth regulator 1	18.9049	-5.92004	1.32874	-3.70277	0.000213257	0.0100162
ENSMUSG00000029161	Cgref1	protein_coding	5	30933143	cell growth regulator with EF hand domain 1	88.2298	-2.27604	0.345568	-3.69259	0.000221985	0.0103849
ENSMUSG00000097779	4833407H14Rik	lincRNA	19	53460631	RIKEN cDNA 4833407H14 gene	58.0293	-1.98395	0.266597	-3.69076	0.000223583	0.0104493
ENSMUSG00000056758	Hmga2	protein_coding	10	120361275	high mobility group AT-hook 2	128.913	-1.83148	0.225504	-3.68723	0.000226708	0.0105797
ENSMUSG00000033577	Myo6	protein_coding	9	80165031	myosin VI	3492.25	-1.53785	0.146561	-3.66978	0.000242759	0.0112677
ENSMUSG00000029675	Eln	protein_coding	5	134702593	elastin	372.081	3.09326	0.571002	3.66593	0.00024644	0.0114105
ENSMUSG00000107728	Gm38910	lincRNA	6	134605234	predicted gene, 38910	235.462	-1.77145	0.210446	-3.66577	0.000246595	0.0114121
ENSMUSG00000054423	Cadps	protein_coding	14	12372563	Ca2+-dependent secretion activator	25.1796	-3.56844	0.700825	-3.66487	0.00024746	0.0114465
ENSMUSG00000030499	Kctd15	protein_coding	7	34639014	potassium channel tetramerisation domain containing 15	151.39	-3.40698	0.657459	-3.66104	0.000251194	0.0116079
ENSMUSG00000074715	Ccl28	protein_coding	13	119623819	chemokine (C-C motif) ligand 28	100.9	-3.56333	0.707042	-3.62543	0.000288479	0.0131195
ENSMUSG00000046834	Krt1	protein_coding	15	101845428	keratin 1	11.6778	-2.97111	0.545467	-3.61362	0.000301957	0.0137061
ENSMUSG00000112449	Srp54a	protein_coding	12	55155104	signal recognition particle 54A	202.631	1.60803	0.16863	3.60571	0.000311297	0.0140895
ENSMUSG00000060002	Chpt1	protein_coding	10	88452745	choline phosphotransferase 1	1941.12	-1.44756	0.124328	-3.59988	0.000318358	0.0143694
ENSMUSG00000022824	Muc13	protein_coding	16	33794037	mucin 13, epithelial transmembrane	198.497	-4.98318	1.10933	-3.59063	0.000329881	0.0147822
ENSMUSG00000085620	G630018N14Rik	lincRNA	13	31349901	RIKEN cDNA G630018N14 gene	14.9206	-3.00787	0.561899	-3.57337	0.000352419	0.0156807
ENSMUSG00000043432	Leng9	protein_coding	7	4147915	leukocyte receptor cluster (LRC) member 9	332.596	-1.59393	0.166293	-3.57162	0.000354775	0.0157782
ENSMUSG00000044976	Wdr72	protein_coding	9	74110356	WD repeat domain 72	328.328	-4.742	1.05432	-3.5492	0.00038641	0.0170693
ENSMUSG00000027227	Sord	protein_coding	2	122234749	sorbitol dehydrogenase	1159.84	-2.2039	0.339248	-3.54874	0.000387074	0.0170861
ENSMUSG00000053297	AI854703	protein_coding	6	48626764	expressed sequence AI854703	9.58896	-3.47507	0.699437	-3.53866	0.00040216	0.0176943
ENSMUSG00000024907	Gal	protein_coding	19	3409919	galanin	5.50441	5.56458	1.29283	3.53069	0.000414482	0.0182026
ENSMUSG00000094806	Cyp2d10	protein_coding	15	82402846	cytochrome P450, family 2, subfamily d, polypeptide 10	5.23624	-4.85384	1.09709	-3.51278	0.000443441	0.0193844
ENSMUSG00000031295	Phka2	protein_coding	X	160502166	phosphorylase kinase alpha 2	258.111	-2.44585	0.411887	-3.51032	0.000447574	0.019538
ENSMUSG00000043557	Mdga1	protein_coding	17	29827956	MAM domain containing glycosylphosphatidylinositol anchor 1	103.233	-2.05664	0.301302	-3.50691	0.000453347	0.0197452
ENSMUSG00000015709	Arnt2	protein_coding	7	84246278	aryl hydrocarbon receptor nuclear translocator 2	39.3892	-4.16084	0.901317	-3.50692	0.000453334	0.0197452
ENSMUSG00000000184	Ccnd2	protein_coding	6	127125162	cyclin D2	7546.56	-3.73729	0.781601	-3.50216	0.000461499	0.0200626
ENSMUSG00000044827	Tlr1	protein_coding	5	64924679	toll-like receptor 1	25.7114	-3.50205	0.714834	-3.50018	0.000464942	0.0201937
ENSMUSG00000024074	Crim1	protein_coding	17	78200248	cysteine rich transmembrane BMP regulator 1 (chordin like)	1313.69	-2.24452	0.35634	-3.4925	0.000478517	0.0207357
ENSMUSG00000053004	Hrh1	protein_coding	6	114397936	histamine receptor H1	24.0615	-2.81688	0.522131	-3.47973	0.000501911	0.02168
ENSMUSG00000037989	Wnk2	protein_coding	13	49036303	WNK lysine deficient protein kinase 2	34.5418	-2.81525	0.522467	-3.47438	0.000512037	0.0220871
ENSMUSG00000066607	6030419C18Rik	protein_coding	9	58488603	RIKEN cDNA 6030419C18 gene	65.3998	-3.38815	0.688958	-3.46633	0.00052762	0.0227076
ENSMUSG00000107271	BC028471	lincRNA	5	149367636	cDNA sequence BC028471	20.3697	-5.31804	1.24632	-3.46464	0.000530945	0.0228403
ENSMUSG00000047730	Fcgbp	protein_coding	7	28071236	Fc fragment of IgG binding protein	956.09	-2.03081	0.297792	-3.4615	0.000537176	0.0230455
ENSMUSG00000085152	Gm11496	lincRNA	11	88993040	predicted gene 11496	8.97166	-3.06469	0.599143	-3.44607	0.000568805	0.0242376
ENSMUSG00000097481	D330020A13Rik	protein_coding	6	120294364	RIKEN cDNA D330020A13 gene	15.7353	-3.06815	0.601065	-3.44081	0.000579969	0.0246362
ENSMUSG00000023073	Slc10a2	protein_coding	8	5083219	solute carrier family 10, member 2	46.8632	-2.75702	0.510779	-3.43988	0.000581972	0.024695
ENSMUSG00000001023	S100a5	protein_coding	3	90608523	S100 calcium binding protein A5	3.27136	-4.79726	1.10407	-3.43933	0.000583147	0.0247152
ENSMUSG00000063564	Col23a1	protein_coding	11	51289920	collagen, type XXIII, alpha 1	727.501	3.89401	0.841629	3.43858	0.000584776	0.0247731
ENSMUSG00000020577	Tspan13	protein_coding	12	36014557	tetraspanin 13	1803.89	-1.70195	0.204339	-3.43525	0.000592014	0.0250685
ENSMUSG00000036944	Tmem71	protein_coding	15	66526212	transmembrane protein 71	127.316	-1.63053	0.183917	-3.42831	0.000607346	0.0256604
ENSMUSG00000044770	Scml4	protein_coding	10	42860370	sex comb on midleg-like 4 (Drosophila)	89.2292	-2.36409	0.397946	-3.42781	0.000608464	0.025696
ENSMUSG00000056812	St8sia3	protein_coding	18	64254359	ST8 alpha-N-acetyl-neuraminide alpha-2,8-sialyltransferase 3	60.6177	-3.07703	0.605991	-3.42749	0.000609196	0.0257041
ENSMUSG00000038167	Plekhg6	protein_coding	6	125362660	pleckstrin homology domain containing, family G (with RhoGef domain) member 6	307.023	-1.40612	0.118584	-3.42478	0.000615308	0.0259158
ENSMUSG00000086328	2700033N17Rik	lincRNA	2	116066218	RIKEN cDNA 2700033N17 gene	4.86822	-4.48301	1.01715	-3.42427	0.000616447	0.0259522
ENSMUSG00000025902	Sox17	protein_coding	1	4490931	SRY (sex determining region Y)-box 17	51.9801	-2.68397	0.495024	-3.40179	0.000669449	0.0279968
ENSMUSG00000076438	Oxct2b	protein_coding	4	123116266	3-oxoacid CoA transferase 2B	3.00944	-4.97589	1.17282	-3.39004	0.000698834	0.029046
ENSMUSG00000066687	Zbtb16	protein_coding	9	48654297	zinc finger and BTB domain containing 16	134.075	4.10306	0.917874	3.3807	0.000723017	0.0298805
ENSMUSG00000055976	Cldn23	protein_coding	8	35824712	claudin 23	1393.96	-4.53205	1.04654	-3.37497	0.000738238	0.0304298
ENSMUSG00000074825	Itpripl1	protein_coding	2	127138772	inositol 1,4,5-triphosphate receptor interacting protein-like 1	233.948	-2.03573	0.306963	-3.37413	0.000740493	0.0304829
ENSMUSG00000074604	Mgst2	protein_coding	3	51660360	microsomal glutathione S-transferase 2	1375.26	-1.81015	0.240256	-3.37202	0.000746177	0.0306856
ENSMUSG00000036545	Adamts2	protein_coding	11	50602084	a disintegrin-like and metallopeptidase (reprolysin type) with thrombospondin type 1 motif, 2	109.912	5.06275	1.20529	3.37076	0.000749613	0.0307785
ENSMUSG00000027938	Creb3l4	protein_coding	3	90237500	cAMP responsive element binding protein 3-like 4	327.314	-2.10072	0.32655	-3.37076	0.000749625	0.0307785
ENSMUSG00000058022	Adtrp	protein_coding	13	41763148	androgen dependent TFPI regulating protein	54.7149	-2.25466	0.372732	-3.36611	0.000762364	0.0312068
ENSMUSG00000018381	Abi3	protein_coding	11	95830074	ABI gene family, member 3	56.2742	-2.82196	0.542276	-3.35985	0.000779851	0.0318537
ENSMUSG00000034785	Dio1	protein_coding	4	107291465	deiodinase, iodothyronine, type I	18.3158	-3.3608	0.702995	-3.3582	0.000784532	0.0319759
ENSMUSG00000031626	Sorbs2	protein_coding	8	45507788	sorbin and SH3 domain containing 2	2363.51	-2.14672	0.342946	-3.34374	0.00082656	0.033487
ENSMUSG00000045339	A930104D05Rik	lincRNA	2	118270233	RIKEN cDNA A930104D05 gene	10.4427	-3.73905	0.821081	-3.3359	0.000850225	0.0342843
ENSMUSG00000052353	Cemip	protein_coding	7	83932857	cell migration inducing protein, hyaluronan binding	27.1916	-1.92479	0.27727	-3.33533	0.000851996	0.0343411
ENSMUSG00000032816	Igdcc4	protein_coding	9	65101486	immunoglobulin superfamily, DCC subclass, member 4	652.371	-2.22333	0.367315	-3.33047	0.000866987	0.0349156
ENSMUSG00000000782	Tcf7	protein_coding	11	52252371	transcription factor 7, T cell specific	112.465	-1.82607	0.248598	-3.32294	0.000890755	0.0356906
ENSMUSG00000112870	AC133207.4	lincRNA	10	70830755		7.79009	-4.02244	0.909823	-3.32201	0.000893719	0.035779
ENSMUSG00000013083	2200002J24Rik	protein_coding	7	30698926	RIKEN cDNA 2200002J24 gene	9.74561	-4.39498	1.02705	-3.30556	0.000947874	0.0377395
ENSMUSG00000071633	Gm4952	protein_coding	19	12599974	predicted gene 4952	13.0862	-3.38798	0.723636	-3.29997	0.00096694	0.0383695
ENSMUSG00000050069	Grem2	protein_coding	1	174833785	gremlin 2, DAN family BMP antagonist	273.601	4.00297	0.913074	3.28885	0.00100596	0.0397844
ENSMUSG00000042349	Ikbke	protein_coding	1	131254343	inhibitor of kappaB kinase epsilon	717.207	-1.71035	0.216148	-3.28641	0.00101474	0.0400982
ENSMUSG00000001348	Acp5	protein_coding	9	22126727	acid phosphatase 5, tartrate resistant	1242.58	-1.83332	0.254832	-3.27006	0.00107523	0.0421367
ENSMUSG00000037833	Sh2d4b	protein_coding	14	40813789	SH2 domain containing 4B	44.3313	-2.37161	0.419441	-3.27009	0.00107514	0.0421367
ENSMUSG00000112198	AC160028.2	lincRNA	10	118803719		6.95798	-4.09377	0.948197	-3.26279	0.00110321	0.0430725
ENSMUSG00000038756	Ttll6	protein_coding	11	96133786	tubulin tyrosine ligase-like family, member 6	47.9542	-2.68034	0.516395	-3.25398	0.00113798	0.044175
ENSMUSG00000028970	Abcb1b	protein_coding	5	8798147	ATP-binding cassette, sub-family B (MDR/TAP), member 1B	250.175	-2.83867	0.565416	-3.25189	0.00114642	0.0444295
ENSMUSG00000054196	Cthrc1	protein_coding	15	39076932	collagen triple helix repeat containing 1	34.0669	3.62421	0.809372	3.24228	0.00118578	0.0457862
ENSMUSG00000026725	Tnn	protein_coding	1	160085029	tenascin N	19.9889	-2.33084	0.411081	-3.23743	0.00120614	0.0464775
ENSMUSG00000050640	Tmem150c	protein_coding	5	100077872	transmembrane protein 150C	51.3856	-2.76437	0.54535	-3.23529	0.00121518	0.0467879
ENSMUSG00000058260	Serpina9	protein_coding	12	103994743	serine (or cysteine) peptidase inhibitor, clade A (alpha-1 antiproteinase, antitrypsin), member 9	118.109	-2.99297	0.617455	-3.22772	0.00124782	0.0479278
ENSMUSG00000001604	Tcea3	protein_coding	4	136247729	transcription elongation factor A (SII), 3	313.227	-2.24766	0.387162	-3.22257	0.00127047	0.0486473
ENSMUSG00000087273	Gm13203	lincRNA	4	148713703	predicted gene 13203	6.59853	-3.70917	0.840698	-3.22252	0.00127067	0.0486473
ENSMUSG00000070704	Ugt2b36	protein_coding	5	87065927	UDP glucuronosyltransferase 2 family, polypeptide B36	8.19364	-4.46431	1.07697	-3.21671	0.00129669	0.0494437
ENSMUSG00000044367	Slc16a13	protein_coding	11	70216789	solute carrier family 16 (monocarboxylic acid transporters), member 13	277.525	-1.707	0.219837	-3.21601	0.00129985	0.049504
ENSMUSG00000090356	Teddm3	protein_coding	16	21152655	transmembrane epididymal family member 3	7.78925	-2.66945	0.519485	-3.21366	0.00131053	0.0498307
ENSMUSG00000028777	Gnat3	protein_coding	5	17962549	guanine nucleotide binding protein, alpha transducing 3	27.207	-3.80632	0.876284	-3.20252	0.00136229	0.0515729
ENSMUSG00000051375	Pcdh1	protein_coding	18	38185914	protocadherin 1	3121.32	-1.7921	0.247821	-3.19623	0.00139234	0.0525822
ENSMUSG00000063522	2010109I03Rik	protein_coding	15	74876987	RIKEN cDNA 2010109I03 gene	39.991	-1.99757	0.312124	-3.19608	0.00139309	0.0525873
ENSMUSG00000044156	Hepacam2	protein_coding	6	3457096	HEPACAM family member 2	59.3709	-2.59703	0.499769	-3.19554	0.00139567	0.052645
ENSMUSG00000021376	Tpmt	protein_coding	13	47022482	thiopurine methyltransferase	246.282	-1.99743	0.312154	-3.19532	0.00139677	0.0526656
ENSMUSG00000094103	1700047I17Rik2	protein_coding	12	55199592	RIKEN cDNA 1700047I17 gene 2	2688.43	1.41498	0.130199	3.18726	0.00143627	0.0540256
ENSMUSG00000046245	Pilra	protein_coding	5	137821952	paired immunoglobin-like type 2 receptor alpha	120.048	-2.41742	0.445201	-3.18378	0.00145365	0.0545495
ENSMUSG00000040148	Hmx3	protein_coding	7	131542867	H6 homeobox 3	7.69995	-4.6437	1.14906	-3.17103	0.00151898	0.0567309
ENSMUSG00000029309	Sparcl1	protein_coding	5	104079111	SPARC-like 1	282.643	2.50664	0.475722	3.16707	0.00153985	0.0574651
ENSMUSG00000021065	Fut8	protein_coding	12	77238125	fucosyltransferase 8	2005.39	-1.90441	0.286597	-3.15569	0.00160119	0.059496
ENSMUSG00000053461	Hhipl2	protein_coding	1	183418215	hedgehog interacting protein-like 2	12.4148	-3.83726	0.899503	-3.15426	0.00160908	0.0597425
ENSMUSG00000017950	Hnf4a	protein_coding	2	163506808	hepatic nuclear factor 4, alpha	5294.98	-2.00924	0.321414	-3.14002	0.00168937	0.0622835
ENSMUSG00000102063	Gm28706	lincRNA	1	125444567	predicted gene 28706	2.38801	-4.67508	1.17076	-3.13905	0.00169495	0.0623679
ENSMUSG00000063903	Klk1	protein_coding	7	44225360	kallikrein 1	36.4945	-3.48038	0.792996	-3.12785	0.00176087	0.0645175
ENSMUSG00000030492	Slc7a9	protein_coding	7	35448796	solute carrier family 7 (cationic amino acid transporter, y+ system), member 9	15.0083	-3.4822	0.79524	-3.12132	0.00180045	0.0658147
ENSMUSG00000112400	AC160863.2	lincRNA	10	95893443		17.3777	-2.33854	0.429542	-3.11621	0.00183192	0.0668105
ENSMUSG00000062826	Ces2f	protein_coding	8	104947356	carboxylesterase 2F	49.6312	-1.97721	0.314461	-3.10758	0.00188628	0.0685025
ENSMUSG00000028076	Cd1d1	protein_coding	3	86995834	CD1d1 antigen	132.409	-2.32757	0.428037	-3.10152	0.00192529	0.0696633
ENSMUSG00000029417	Cxcl9	protein_coding	5	92321347	chemokine (C-X-C motif) ligand 9	169.53	-3.60524	0.841325	-3.09659	0.00195764	0.070741
ENSMUSG00000068762	Gstm6	protein_coding	3	107938847	glutathione S-transferase, mu 6	74.2435	-1.86836	0.28147	-3.08508	0.00203499	0.0732007
ENSMUSG00000042846	Lrrtm3	protein_coding	10	63928472	leucine rich repeat transmembrane neuronal 3	9.72799	-3.05387	0.66574	-3.08509	0.00203491	0.0732007
ENSMUSG00000037962	Rflna	protein_coding	5	125003221	refilin A	22.1503	-2.56798	0.50905	-3.08021	0.00206853	0.0742381
ENSMUSG00000026984	Il1f6	protein_coding	2	24215418	interleukin 1 family, member 6	5.185	-5.15874	1.35065	-3.07906	0.00207656	0.0744699
ENSMUSG00000050179	A930002I21Rik	lincRNA	3	107090880	RIKEN cDNA A930002I21 gene	20.3496	-4.67901	1.19519	-3.07816	0.0020828	0.0746087
ENSMUSG00000030218	Mgp	protein_coding	6	136872435	matrix Gla protein	154.616	2.64986	0.536846	3.07324	0.00211748	0.0756505
ENSMUSG00000075143	Olfr1157	protein_coding	2	87958485	olfactory receptor 1157	15.6419	-2.26176	0.410756	-3.07181	0.00212766	0.0759542
ENSMUSG00000035020	Epgn	protein_coding	5	91027464	epithelial mitogen	129.862	2.57501	0.513302	3.06838	0.00215222	0.076718
ENSMUSG00000034438	Gbp8	protein_coding	5	105014150	guanylate-binding protein 8	228.736	-2.19201	0.388847	-3.0655	0.00217306	0.0773442
ENSMUSG00000022235	Cmbl	protein_coding	15	31568791	carboxymethylenebutenolidase-like (Pseudomonas)	385.584	-1.866	0.284138	-3.04783	0.00230503	0.0814595
ENSMUSG00000024402	Lta	protein_coding	17	35203165	lymphotoxin A	24.6596	-1.88341	0.291552	-3.03003	0.00244533	0.0858884
ENSMUSG00000043648	Pld6	protein_coding	11	59783897	phospholipase D family, member 6	63.5686	2.39782	0.463991	3.01259	0.00259026	0.0903251
ENSMUSG00000035852	Misp	protein_coding	10	79820989	mitotic spindle positioning	1388.71	-2.25526	0.417757	-3.00477	0.00265782	0.0924087
ENSMUSG00000025934	Gsta3	protein_coding	1	21240589	glutathione S-transferase, alpha 3	1579.79	-1.61292	0.204112	-3.00286	0.0026746	0.0928759
ENSMUSG00000062591	Tubb4a	protein_coding	17	57080066	tubulin, beta 4A class IVA	85.6322	-2.03674	0.345836	-2.99778	0.00271956	0.0940715
ENSMUSG00000006800	Sulf2	protein_coding	2	166073089	sulfatase 2	1359.45	-1.83576	0.278902	-2.99659	0.00273015	0.0943686
ENSMUSG00000022102	Dok2	protein_coding	14	70766036	docking protein 2	77.7974	-2.35597	0.45289	-2.99404	0.00275314	0.0949928
ENSMUSG00000032369	Plscr1	protein_coding	9	92249750	phospholipid scramblase 1	2411.48	-1.4733	0.158155	-2.99263	0.00276581	0.0952534
ENSMUSG00000037033	Clca3b	protein_coding	3	144822623	chloride channel accessory 3B	33.5513	-4.67156	1.23231	-2.97941	0.00288806	0.0991811
ENSMUSG00000037921	Ddx60	protein_coding	8	61928087	DEAD (Asp-Glu-Ala-Asp) box polypeptide 60	151.748	-2.56309	0.526001	-2.97165	0.00296206	0.101458
ENSMUSG00000041642	Kif21b	protein_coding	1	136131389	kinesin family member 21B	650.005	-2.07004	0.361228	-2.96224	0.0030541	0.104347
ENSMUSG00000018924	Alox15	protein_coding	11	70344152	arachidonate 15-lipoxygenase	13.944	-3.39056	0.810264	-2.95035	0.00317419	0.108007
ENSMUSG00000001021	S100a3	protein_coding	3	90560578	S100 calcium binding protein A3	23.3853	-1.98286	0.333711	-2.94524	0.00322703	0.109425
ENSMUSG00000019982	Myb	protein_coding	10	21124935	myeloblastosis oncogene	103.082	-4.08349	1.0483	-2.94142	0.00326714	0.110548
ENSMUSG00000040828	Catsperd	protein_coding	17	56628143	cation channel sperm associated auxiliary subunit delta	32.3298	-2.01558	0.345755	-2.93728	0.00331106	0.111834
ENSMUSG00000032690	Oas2	protein_coding	5	120730333	2'-5' oligoadenylate synthetase 2	422.653	-3.25886	0.769456	-2.93565	0.00332845	0.112221
ENSMUSG00000034634	Ly6d	protein_coding	15	74762056	lymphocyte antigen 6 complex, locus D	9491.24	-2.23165	0.421023	-2.92538	0.0034404	0.115584
ENSMUSG00000097800	B230344G16Rik	lincRNA	11	115988052	RIKEN cDNA B230344G16 gene	8.46886	-2.98693	0.679541	-2.92393	0.00345638	0.116038
ENSMUSG00000035606	Ky	protein_coding	9	102505750	kyphoscoliosis peptidase	20.7961	-3.20329	0.756124	-2.91393	0.00356908	0.119146
ENSMUSG00000041695	Kcnj2	protein_coding	11	111066164	potassium inwardly-rectifying channel, subfamily J, member 2	294.948	2.80452	0.619324	2.9137	0.00357177	0.119193
ENSMUSG00000019997	Ctgf	protein_coding	10	24595442	connective tissue growth factor	1718.5	-1.85622	0.294425	-2.90812	0.00363605	0.121082
ENSMUSG00000020875	Hoxb9	protein_coding	11	96271457	homeobox B9	9.44319	-2.99651	0.686631	-2.90769	0.00364111	0.121208
ENSMUSG00000045318	Adra2c	protein_coding	5	35278319	adrenergic receptor, alpha 2c	4.27552	-3.53342	0.874271	-2.89776	0.00375842	0.124544
ENSMUSG00000026976	Pax8	protein_coding	2	24420560	paired box 8	15.7659	-3.46361	0.851429	-2.89349	0.00380983	0.125851
ENSMUSG00000090231	Cfb	protein_coding	17	34856374	complement factor B	3474.68	-2.43548	0.496857	-2.88912	0.00386319	0.127435
ENSMUSG00000021768	Dusp13	protein_coding	14	21733394	dual specificity phosphatase 13	7.93485	-2.89695	0.659274	-2.87734	0.00401048	0.131242
ENSMUSG00000030494	Rhpn2	protein_coding	7	35334170	rhophilin, Rho GTPase binding protein 2	2470.5	-1.75512	0.262805	-2.87332	0.00406186	0.132786
ENSMUSG00000037370	Enpp1	protein_coding	10	24637914	ectonucleotide pyrophosphatase/phosphodiesterase 1	847.164	-2.19917	0.41811	-2.86808	0.00412972	0.134725
ENSMUSG00000044393	Dsg2	protein_coding	18	20558074	desmoglein 2	3847.8	-1.74357	0.259276	-2.86786	0.00413257	0.134771
ENSMUSG00000048775	Serpinb13	protein_coding	1	106980984	serine (or cysteine) peptidase inhibitor, clade B (ovalbumin), member 13	8.17042	-2.48191	0.517171	-2.86541	0.00416464	0.135584
ENSMUSG00000030317	Timp4	protein_coding	6	115241892	tissue inhibitor of metalloproteinase 4	27.0772	-2.9399	0.678746	-2.85807	0.00426229	0.13805
ENSMUSG00000025330	Padi4	protein_coding	4	140745865	peptidyl arginine deiminase, type IV	80.2854	-2.25601	0.441538	-2.84463	0.00444627	0.142884
ENSMUSG00000047990	C2cd4a	protein_coding	9	67830489	C2 calcium-dependent domain containing 4A	5.53901	-3.87887	1.01236	-2.84373	0.00445889	0.143193
ENSMUSG00000021846	Peli2	protein_coding	14	48120869	pellino 2	291.531	2.12844	0.39716	2.84128	0.00449325	0.144101
ENSMUSG00000049191	Rgag4	protein_coding	X	102066544	retrotransposon gag domain containing 4	224.438	-2.35828	0.479662	-2.83174	0.00462957	0.147523
ENSMUSG00000097691	9030616G12Rik	lincRNA	10	128971197	RIKEN cDNA 9030616G12 gene	6.39492	-3.68732	0.949379	-2.83061	0.00464596	0.147846
ENSMUSG00000090272	Mndal	protein_coding	1	173849126	myeloid nuclear differentiation antigen like	96.2997	-2.90165	0.672418	-2.82808	0.00468278	0.148967
ENSMUSG00000041836	Ptpre	protein_coding	7	135537481	protein tyrosine phosphatase, receptor type, E	586.922	-1.39758	0.141229	-2.81518	0.00487495	0.154199
ENSMUSG00000026405	C4bp	protein_coding	1	130634773	complement component 4 binding protein	468.573	-2.22951	0.437549	-2.81	0.00495411	0.156442
ENSMUSG00000052632	Asap2	protein_coding	12	21111748	ArfGAP with SH3 domain, ankyrin repeat and PH domain 2	1947.57	-1.45155	0.160767	-2.80872	0.00497396	0.156964
ENSMUSG00000037159	Wee2	protein_coding	6	40439088	WEE1 homolog 2 (S. pombe)	4.99595	-4.24467	1.15673	-2.80503	0.00503114	0.15861
ENSMUSG00000037716	Ccdc33	protein_coding	9	58028677	coiled-coil domain containing 33	42.8218	-2.99848	0.713607	-2.80053	0.00510185	0.160625
ENSMUSG00000021281	Tnfaip2	protein_coding	12	111442469	tumor necrosis factor, alpha-induced protein 2	670.147	-2.09268	0.390354	-2.7992	0.00512296	0.161236
ENSMUSG00000036123	Slc9a3	protein_coding	13	74121457	solute carrier family 9 (sodium/hydrogen exchanger), member 3	12.0611	-3.52275	0.90398	-2.79071	0.00525929	0.16476
ENSMUSG00000109061	Map2k7	protein_coding	8	4238865	mitogen-activated protein kinase kinase 7	7.62778	5.18566	1.5044	2.78227	0.00539796	0.168713
ENSMUSG00000068115	Ninl	protein_coding	2	150934519	ninein-like	434.769	-1.95418	0.344447	-2.77017	0.00560274	0.173793
ENSMUSG00000009687	Fxyd5	protein_coding	7	31032722	FXYD domain-containing ion transport regulator 5	524.813	-2.03764	0.377465	-2.74897	0.00597822	0.18394
ENSMUSG00000112290	AC153938.2	lincRNA	10	96310131		3.94187	-3.95751	1.07734	-2.7452	0.0060474	0.185459
ENSMUSG00000026664	Phyh	protein_coding	2	4919019	phytanoyl-CoA hydroxylase	1650.66	-1.37211	0.135581	-2.74452	0.00605987	0.185661
ENSMUSG00000057604	Lmcd1	protein_coding	6	112273758	LIM and cysteine-rich domains 1	21.7495	2.49817	0.546914	2.73932	0.00615659	0.188319
ENSMUSG00000063672	Nkx6-3	protein_coding	8	23153269	NK6 homeobox 3	11.8576	-2.28212	0.470354	-2.72586	0.00641334	0.194913
ENSMUSG00000085375	Gm12506	lincRNA	4	55605149	predicted gene 12506	4.02917	-3.36017	0.866053	-2.72521	0.00642615	0.195177
ENSMUSG00000074738	Fndc10	protein_coding	4	155694342	fibronectin type III domain containing 10	102.38	-1.83096	0.306258	-2.71326	0.00666251	0.201837
ENSMUSG00000004929	Thop1	protein_coding	10	81070035	thimet oligopeptidase 1	1270.26	-1.40559	0.149766	-2.70819	0.00676514	0.204162
ENSMUSG00000075217	4833423E24Rik	protein_coding	2	85483594	RIKEN cDNA 4833423E24 gene	6.25508	-3.83293	1.04865	-2.7015	0.00690265	0.20765
ENSMUSG00000044199	S1pr4	protein_coding	10	81497747	sphingosine-1-phosphate receptor 4	19.4413	-1.94878	0.35142	-2.69985	0.00693712	0.208487
ENSMUSG00000069170	Adgrv1	protein_coding	13	81095068	adhesion G protein-coupled receptor V1	81.388	-1.76776	0.284534	-2.69829	0.00696965	0.209333
ENSMUSG00000026247	Ecel1	protein_coding	1	87147655	endothelin converting enzyme-like 1	18.0621	-5.39255	1.62944	-2.69574	0.00702335	0.210812
ENSMUSG00000028266	Lmo4	protein_coding	3	144188530	LIM domain only 4	3280.16	-1.38784	0.143985	-2.69358	0.00706884	0.211908
ENSMUSG00000025176	Hoga1	protein_coding	19	42045610	4-hydroxy-2-oxoglutarate aldolase 1	310.46	2.743	0.649447	2.68382	0.00727853	0.217574
ENSMUSG00000040471	Ggt6	protein_coding	11	72435526	gamma-glutamyltransferase 6	92.4857	-2.04824	0.391008	-2.68087	0.00734301	0.219225
ENSMUSG00000046634	Pkd1l1	protein_coding	11	8826708	polycystic kidney disease 1 like 1	6.2681	-3.34016	0.875509	-2.67292	0.00751952	0.22407
ENSMUSG00000049036	Tmem121	protein_coding	12	113185930	transmembrane protein 121	6.9861	-3.96003	1.1097	-2.66742	0.00764353	0.227286
ENSMUSG00000091594	Gm17067	protein_coding	7	42705469	predicted gene 17067	24.1074	-5.31758	1.62043	-2.66446	0.00771128	0.229063
ENSMUSG00000028359	Orm3	protein_coding	4	63356162	orosomucoid 3	45.8371	4.00446	1.12859	2.66215	0.00776438	0.230207
ENSMUSG00000008136	Fhl2	protein_coding	1	43123074	four and a half LIM domains 2	939.145	-2.34448	0.50563	-2.65902	0.00783688	0.232138
ENSMUSG00000050730	Arhgap42	protein_coding	9	8994329	Rho GTPase activating protein 42	444.18	-2.22549	0.461853	-2.65341	0.00796828	0.235588
ENSMUSG00000053522	Lgals7	protein_coding	7	28863853	lectin, galactose binding, soluble 7	13.7943	-3.66647	1.0075	-2.64661	0.00813034	0.239706
ENSMUSG00000094800	Gm9780	protein_coding	14	26027282	predicted gene 9780	167.54	-3.22378	0.845052	-2.63153	0.00850016	0.249456
ENSMUSG00000041556	Fbxo2	protein_coding	4	148160621	F-box protein 2	36.7887	1.81202	0.308671	2.63069	0.00852127	0.249985
ENSMUSG00000032327	Stra6	protein_coding	9	58063788	stimulated by retinoic acid gene 6	95.9613	-2.3893	0.529244	-2.62506	0.00866327	0.253243
ENSMUSG00000027859	Ngf	protein_coding	3	102469919	nerve growth factor	59.7249	-2.28229	0.488964	-2.62247	0.0087295	0.255066
ENSMUSG00000020627	Klhl29	protein_coding	12	5077472	kelch-like 29	149.417	2.47829	0.564435	2.61906	0.00881711	0.257271
ENSMUSG00000072419	Dppa2	protein_coding	16	48310477	developmental pluripotency associated 2	8.27708	-3.3026	0.879984	-2.61664	0.00888	0.258825
ENSMUSG00000032053	Pou2af1	protein_coding	9	51213708	POU domain, class 2, associating factor 1	22.0148	-2.16362	0.446119	-2.60832	0.0090987	0.264304
ENSMUSG00000024511	Rab27b	protein_coding	18	69979131	RAB27B, member RAS oncogene family	2987.24	-1.72628	0.278529	-2.60755	0.00911936	0.264741
ENSMUSG00000022094	Slc39a14	protein_coding	14	70303469	solute carrier family 39 (zinc transporter), member 14	636.75	-1.41295	0.159051	-2.59636	0.00942179	0.271936
ENSMUSG00000036834	Plch1	protein_coding	3	63696234	phospholipase C, eta 1	580.484	-1.71496	0.276179	-2.58877	0.00963186	0.277432
ENSMUSG00000039110	Mycbpap	protein_coding	11	94501347	MYCBP associated protein	222.841	-1.8185	0.316329	-2.58749	0.00966785	0.278274
ENSMUSG00000071335	Mfsd4b3	protein_coding	10	39946907	major facilitator superfamily domain containing 4B3	32.5535	-1.85953	0.332318	-2.58648	0.00969619	0.27892
ENSMUSG00000032340	Neo1	protein_coding	9	58874687	neogenin	1596.4	-1.47126	0.182898	-2.57666	0.00997615	0.285498
ENSMUSG00000046152	Fut10	protein_coding	8	31187331	fucosyltransferase 10	30.3819	2.54703	0.603689	2.56262	0.0103886	0.295248
ENSMUSG00000035356	Nfkbiz	protein_coding	16	55811375	nuclear factor of kappa light polypeptide gene enhancer in B cells inhibitor, zeta	3698.61	-1.83664	0.328432	-2.54737	0.010854	0.305448
ENSMUSG00000084174	Sycn	protein_coding	7	28540885	syncollin	15.0299	-3.14046	0.843009	-2.53908	0.0111146	0.311577
ENSMUSG00000019944	Rhobtb1	protein_coding	10	69151434	Rho-related BTB domain containing 1	524.058	-1.61659	0.24287	-2.53879	0.0111238	0.311742
ENSMUSG00000028544	Slc5a9	protein_coding	4	111875375	solute carrier family 5 (sodium/glucose cotransporter), member 9	75.2203	-2.1757	0.463968	-2.53401	0.0112766	0.315279
ENSMUSG00000040270	Bach2	protein_coding	4	32238804	BTB and CNC homology, basic leucine zipper transcription factor 2	403.51	1.68493	0.270387	2.53314	0.0113046	0.315874
ENSMUSG00000091449	Gm10269	protein_coding	18	20682592	predicted gene 10269	163.952	-2.7623	0.696416	-2.53053	0.0113892	0.317769
ENSMUSG00000028039	Efna3	protein_coding	3	89313899	ephrin A3	43.9429	1.8156	0.32244	2.52946	0.0114239	0.318268
ENSMUSG00000045667	Smtnl2	protein_coding	11	72389164	smoothelin-like 2	306.373	2.20363	0.476329	2.52688	0.011508	0.320328
ENSMUSG00000020787	P2rx1	protein_coding	11	72999103	purinergic receptor P2X, ligand-gated ion channel, 1	3.98337	-3.68612	1.06346	-2.52583	0.0115425	0.320911
ENSMUSG00000000440	Pparg	protein_coding	6	115360951	peroxisome proliferator activated receptor gamma	761.226	-1.95939	0.380411	-2.52198	0.0116697	0.323781
ENSMUSG00000021091	Serpina3n	protein_coding	12	104406729	serine (or cysteine) peptidase inhibitor, clade A, member 3N	54.8946	2.82338	0.723865	2.51894	0.0117707	0.326291
ENSMUSG00000021765	Fst	protein_coding	13	114452262	follistatin	27.6809	-2.29981	0.516569	-2.51623	0.0118618	0.327957
ENSMUSG00000020241	Col6a2	protein_coding	10	76595762	collagen, type VI, alpha 2	536.598	3.23133	0.892274	2.50072	0.012394	0.340386
ENSMUSG00000025515	Muc2	protein_coding	7	141690340	mucin 2	12.6897	-3.80894	1.12455	-2.49784	0.0124953	0.342377
ENSMUSG00000015852	Fcrls	protein_coding	3	87250758	Fc receptor-like S, scavenger receptor	18.4366	-2.54209	0.620093	-2.48687	0.0128873	0.351283
ENSMUSG00000011148	Adssl1	protein_coding	12	112620045	adenylosuccinate synthetase like 1	3367.57	1.79042	0.319517	2.4738	0.0133685	0.362729
ENSMUSG00000043165	Lor	protein_coding	3	92080271	loricrin	16.4892	-2.22346	0.495089	-2.47118	0.0134666	0.365076
ENSMUSG00000062496	4930431F12Rik	lincRNA	5	44966200	RIKEN cDNA 4930431F12 gene	7.88891	-2.97851	0.800976	-2.47012	0.0135067	0.365954
ENSMUSG00000032033	Barx2	protein_coding	9	31846044	BarH-like homeobox 2	47.1202	-2.35685	0.549907	-2.46741	0.0136094	0.368208
ENSMUSG00000046108	Il17c	protein_coding	8	122422020	interleukin 17C	12.4105	-2.62526	0.658866	-2.46676	0.0136343	0.368776
ENSMUSG00000030350	Prmt8	protein_coding	6	127689011	protein arginine N-methyltransferase 8	429.445	2.58832	0.644269	2.46531	0.0136896	0.369718
ENSMUSG00000085421	4732490B19Rik	lincRNA	11	113203315	RIKEN cDNA 4732490B19 gene	35.8116	-1.92379	0.376661	-2.45258	0.0141835	0.381236
ENSMUSG00000024292	Cyp4f14	protein_coding	17	32905071	cytochrome P450, family 4, subfamily f, polypeptide 14	4.25185	-3.22768	0.909937	-2.44816	0.0143586	0.385005
ENSMUSG00000022548	Apod	protein_coding	16	31296192	apolipoprotein D	8.2081	3.16846	0.888677	2.44009	0.0146834	0.392
ENSMUSG00000106466	Gm40348	lincRNA	5	137166450	predicted gene, 40348	2.57404	-4.16905	1.30553	-2.42741	0.0152071	0.402769
ENSMUSG00000029123	Stk32b	protein_coding	5	37446825	serine/threonine kinase 32B	17.69	-2.71	0.70455	-2.42708	0.0152207	0.402934
ENSMUSG00000091255	Speer4e	protein_coding	5	14933221	spermatogenesis associated glutamate (E)-rich protein 4e	7.88202	-2.73909	0.71742	-2.42409	0.0153468	0.405705
ENSMUSG00000033581	Igf2bp2	protein_coding	16	22059009	insulin-like growth factor 2 mRNA binding protein 2	362.971	-1.87288	0.362341	-2.40901	0.0159957	0.420743
ENSMUSG00000059142	Zfp945	protein_coding	17	22846697	zinc finger protein 945	309.807	2.09574	0.455025	2.40808	0.0160367	0.421119
ENSMUSG00000043020	Wdr63	protein_coding	3	146040526	WD repeat domain 63	9.07839	-2.49883	0.625465	-2.39634	0.0165598	0.432271
ENSMUSG00000069922	Ces3a	protein_coding	8	105048601	carboxylesterase 3A	2.75836	-3.57623	1.07711	-2.39179	0.0167663	0.437003
ENSMUSG00000027574	Nkain4	protein_coding	2	180934772	Na+/K+ transporting ATPase interacting 4	23.5129	-2.04535	0.43789	-2.38725	0.016975	0.441714
ENSMUSG00000092618	Btnl6	protein_coding	17	34507804	butyrophilin-like 6	9.32721	-2.79495	0.754255	-2.37977	0.0173237	0.449304
ENSMUSG00000047773	Ankfn1	protein_coding	11	89390223	ankyrin-repeat and fibronectin type III domain containing 1	6.71085	-2.93625	0.813784	-2.37932	0.0173448	0.449729
ENSMUSG00000085126	Gm12589	lincRNA	11	121803107	predicted gene 12589	2.76693	-3.82686	1.19123	-2.37305	0.0176419	0.455809
ENSMUSG00000040570	Rundc3b	protein_coding	5	8490334	RUN domain containing 3B	63.1905	-2.06484	0.449093	-2.3711	0.0177353	0.457846
ENSMUSG00000020773	Trim47	protein_coding	11	116105752	tripartite motif-containing 47	196.546	-2.13209	0.477526	-2.37075	0.0177522	0.458159
ENSMUSG00000022768	Ccdc116	protein_coding	16	17139064	coiled-coil domain containing 116	78.5843	-1.79566	0.336347	-2.36558	0.0180019	0.463621
ENSMUSG00000061068	Mcpt4	protein_coding	14	56059744	mast cell protease 4	4.8647	-3.55887	1.08395	-2.36069	0.0182411	0.467716
ENSMUSG00000085772	D630024D03Rik	lincRNA	11	31790113	RIKEN cDNA D630024D03 gene	78.8637	2.4868	0.629895	2.36039	0.0182555	0.467958
ENSMUSG00000068874	Selenbp1	protein_coding	3	94933056	selenium binding protein 1	43248	2.22591	0.519664	2.35905	0.0183218	0.469021
ENSMUSG00000114430	AC107763.1	lincRNA	5	9034780		29.8206	-3.136	0.906174	-2.35716	0.0184152	0.470904
ENSMUSG00000028927	Padi2	protein_coding	4	140906344	peptidyl arginine deiminase, type II	291.006	-2.28436	0.54545	-2.35468	0.0185385	0.473289
ENSMUSG00000079324	4932414N04Rik	protein_coding	2	68656486	RIKEN cDNA 4932414N04 gene	11.8529	-3.62577	1.11647	-2.35185	0.0186803	0.476463
ENSMUSG00000112230	AC153495.1	lincRNA	10	118502035		3.01319	-4.25823	1.39142	-2.34165	0.0191985	0.487771
ENSMUSG00000043873	Chil5	protein_coding	3	106016919	chitinase-like 5	10.4718	-2.66815	0.713097	-2.3393	0.0193197	0.48993
ENSMUSG00000053965	Pde5a	protein_coding	3	122728947	phosphodiesterase 5A, cGMP-specific	279.883	-2.03486	0.44283	-2.33693	0.0194429	0.492262
ENSMUSG00000057315	Arhgap24	protein_coding	5	102481391	Rho GTPase activating protein 24	234.166	-1.7951	0.340685	-2.33382	0.0196053	0.495977
ENSMUSG00000073399	Trim40	protein_coding	17	36881598	tripartite motif-containing 40	25.3894	-3.07437	0.889753	-2.3314	0.0197321	0.498384
ENSMUSG00000030087	Klf15	protein_coding	6	90462576	Kruppel-like factor 15	384.722	2.30058	0.55816	2.33012	0.0197998	0.499353
ENSMUSG00000050762	Prss27	protein_coding	17	24038144	protease, serine 27	5.54861	-2.65957	0.713224	-2.32686	0.0199727	0.502983
ENSMUSG00000005553	Atp4a	protein_coding	7	30712209	ATPase, H+/K+ exchanging, gastric, alpha polypeptide	36.3025	-2.60303	0.690169	-2.32266	0.0201975	0.507836
ENSMUSG00000027204	Fbn1	protein_coding	2	125300594	fibrillin 1	61.5106	2.16326	0.501139	2.32123	0.0202745	0.509231
ENSMUSG00000036814	Slc6a20a	protein_coding	9	123634770	solute carrier family 6 (neurotransmitter transporter), member 20A	434.99	-1.73369	0.316077	-2.32123	0.0202744	0.509231
ENSMUSG00000084850	Gm12092	lincRNA	11	29612324	predicted gene 12092	5.0894	3.82781	1.21834	2.32105	0.0202844	0.509343
ENSMUSG00000062282	Gm10113	lincRNA	13	46175428	predicted gene 10113	14.8258	-2.0175	0.442718	-2.2983	0.0215448	0.534468
ENSMUSG00000036198	Arhgap36	protein_coding	X	49463945	Rho GTPase activating protein 36	2.40526	-3.68984	1.17226	-2.29457	0.0217576	0.539007
ENSMUSG00000030428	Ttyh1	protein_coding	7	4119408	tweety family member 1	38.255	-2.00716	0.439157	-2.2934	0.0218249	0.540145
ENSMUSG00000075307	Klhl41	protein_coding	2	69670120	kelch-like 41	14.5524	-2.10537	0.481977	-2.29341	0.0218246	0.540145
ENSMUSG00000068877	Selenbp2	protein_coding	3	94693556	selenium binding protein 2	363.323	2.31605	0.57397	2.29289	0.0218541	0.540725
ENSMUSG00000047797	Gjb1	protein_coding	X	101376378	gap junction protein, beta 1	2395.69	-1.98376	0.429511	-2.29041	0.0219975	0.543149
ENSMUSG00000031377	Bmx	protein_coding	X	164192842	BMX non-receptor tyrosine kinase	70.3173	-1.81092	0.355673	-2.27995	0.0226104	0.555949
ENSMUSG00000042808	Gpx2	protein_coding	12	76792333	glutathione peroxidase 2	1195.68	-1.85532	0.375508	-2.27776	0.0227406	0.55886
ENSMUSG00000112762	AC131596.1	lincRNA	10	96226020		8.415	-2.3221	0.580818	-2.27627	0.0228296	0.560757
ENSMUSG00000110266	Gm32742	protein_coding	9	51130307	predicted gene, 32742	64.1312	-1.90975	0.40034	-2.27245	0.0230596	0.565378
ENSMUSG00000095385	D630033O11Rik	lincRNA	9	43243599	RIKEN cDNA D630033O11 gene	8.46027	-2.7622	0.777967	-2.26513	0.0235048	0.574655
ENSMUSG00000035186	Ubd	protein_coding	17	37193892	ubiquitin D	171.932	-2.8764	0.829277	-2.26269	0.0236547	0.577425
ENSMUSG00000058056	Palld	protein_coding	8	61511433	palladin, cytoskeletal associated protein	562.705	-1.46969	0.207636	-2.26209	0.0236918	0.577915
ENSMUSG00000041722	Khdc1c	protein_coding	1	21368331	KH domain containing 1C	2.10093	-4.08338	1.36613	-2.25703	0.0240065	0.584211
ENSMUSG00000086478	Gm14102	lincRNA	2	132958442	predicted gene 14102	2.29827	-3.66546	1.18476	-2.24979	0.0244624	0.594488
ENSMUSG00000018217	Pmp22	protein_coding	11	63128982	peripheral myelin protein 22	1891.82	2.06921	0.476285	2.2449	0.0247748	0.600678
ENSMUSG00000020566	Atp6v1c2	protein_coding	12	17284721	ATPase, H+ transporting, lysosomal V1 subunit C2	2134.32	1.75174	0.334951	2.24433	0.0248111	0.601003
ENSMUSG00000002289	Angptl4	protein_coding	17	33773750	angiopoietin-like 4	797.665	-2.06617	0.475144	-2.24389	0.0248393	0.601532
ENSMUSG00000090124	Ugt1a7c	protein_coding	1	88095062	UDP glucuronosyltransferase 1 family, polypeptide A7C	67.3971	-1.94877	0.424488	-2.23508	0.0254118	0.612868
ENSMUSG00000047117	Ankdd1b	protein_coding	13	96416134	ankyrin repeat and death domain containing 1B	226.903	-1.95659	0.428032	-2.23486	0.0254266	0.612912
ENSMUSG00000024225	Clps	protein_coding	17	28558210	colipase, pancreatic	18.8216	-3.48592	1.11347	-2.2326	0.0255756	0.615584
ENSMUSG00000001119	Col6a1	protein_coding	10	76708792	collagen, type VI, alpha 1	3359.5	3.06535	0.925954	2.23051	0.0257136	0.618433
ENSMUSG00000042041	2010003K11Rik	protein_coding	19	4496790	RIKEN cDNA 2010003K11 gene	17.1546	-1.99497	0.446164	-2.23006	0.0257435	0.618995
ENSMUSG00000019945	1700040L02Rik	protein_coding	10	68430953	RIKEN cDNA 1700040L02 gene	46.9166	-1.93376	0.418869	-2.22924	0.0257977	0.619668
ENSMUSG00000067525	Olfr1427	protein_coding	19	12098006	olfactory receptor 1427	7.65341	-3.18402	0.980171	-2.2282	0.025867	0.621017
ENSMUSG00000011008	Mcoln2	protein_coding	3	146149833	mucolipin 2	75.3831	-1.73347	0.329378	-2.22683	0.0259584	0.622739
ENSMUSG00000023393	Slc17a9	protein_coding	2	180725263	solute carrier family 17, member 9	326.069	-1.63625	0.286149	-2.22349	0.0261831	0.627334
ENSMUSG00000073599	Ecscr	protein_coding	18	35713086	endothelial cell surface expressed chemotaxis and apoptosis regulator	357.685	-1.52807	0.237739	-2.22122	0.026336	0.629936
ENSMUSG00000040584	Abcb1a	protein_coding	5	8660077	ATP-binding cassette, sub-family B (MDR/TAP), member 1A	299.318	-3.14777	0.966948	-2.22119	0.0263383	0.629936
ENSMUSG00000086576	Gm13660	lincRNA	2	75458966	predicted gene 13660	2.11531	-3.69854	1.21583	-2.21951	0.0264522	0.631703
ENSMUSG00000021587	Pcsk1	protein_coding	13	75089826	proprotein convertase subtilisin/kexin type 1	6.46945	-2.84048	0.829644	-2.2184	0.0265279	0.632774
ENSMUSG00000022231	Sema5a	protein_coding	15	32244813	sema domain, seven thrombospondin repeats (type 1 and type 1-like), transmembrane domain (TM) and short cytoplasmic domain, (semaphorin) 5A	96.3731	2.2049	0.545146	2.21024	0.0270884	0.644781
ENSMUSG00000047880	Cxcr5	protein_coding	9	44511787	chemokine (C-X-C motif) receptor 5	14.5181	-2.40129	0.635088	-2.20646	0.0273521	0.649586
ENSMUSG00000069421	Olfr810	protein_coding	10	129787289	olfactory receptor 810	11.8374	-2.34284	0.609175	-2.20436	0.0274993	0.651938
ENSMUSG00000095427	Rps2-ps6	protein_coding	14	76236688	ribosomal protein S2, pseudogene 6	100.914	-3.94085	1.33682	-2.19988	0.0278151	0.658271
ENSMUSG00000042677	Zc3h12a	protein_coding	4	125118423	zinc finger CCCH type containing 12A	1529.55	-1.69595	0.317051	-2.19507	0.0281588	0.664741
ENSMUSG00000096987	Gm26525	lincRNA	4	88784455	predicted gene, 26525	3.27221	5.69285	2.13879	2.19416	0.0282237	0.666107
ENSMUSG00000040170	Fmo2	protein_coding	1	162874317	flavin containing monooxygenase 2	432.961	2.33086	0.60668	2.19367	0.0282589	0.666773
ENSMUSG00000020669	Sh3yl1	protein_coding	12	30911668	Sh3 domain YSC-like 1	767.074	-1.34966	0.159404	-2.19353	0.0282695	0.666856
ENSMUSG00000027160	Ccdc34	protein_coding	2	110017817	coiled-coil domain containing 34	227.524	-1.80169	0.36655	-2.18712	0.0287336	0.675111
ENSMUSG00000097668	Gm26761	lincRNA	5	64695461	predicted gene, 26761	5.45846	-2.30998	0.601156	-2.17909	0.0293247	0.685934
ENSMUSG00000027456	Sdcbp2	protein_coding	2	151572622	syndecan binding protein (syntenin) 2	2272.19	-1.79154	0.363285	-2.17885	0.0293426	0.6861
ENSMUSG00000095304	Plac9a	protein_coding	14	25887506	placenta specific 9a	3.46273	-3.86171	1.31343	-2.1788	0.0293463	0.6861
ENSMUSG00000026278	Bok	protein_coding	1	93685660	BCL2-related ovarian killer	984.742	-1.37412	0.171924	-2.17609	0.0295483	0.690482
ENSMUSG00000017868	Sgk2	protein_coding	2	162987330	serum/glucocorticoid regulated kinase 2	15.8326	-1.99364	0.456648	-2.17594	0.0295598	0.690581
ENSMUSG00000103711	Tstd1	protein_coding	1	171418872	thiosulfate sulfurtransferase (rhodanese)-like domain containing 1	154.021	-2.22661	0.564037	-2.1747	0.0296523	0.6924
ENSMUSG00000031445	Proz	protein_coding	8	13060914	protein Z, vitamin K-dependent plasma glycoprotein	68.396	-2.15705	0.533441	-2.16904	0.0300799	0.70083
ENSMUSG00000034714	Ttyh2	protein_coding	11	114675431	tweety family member 2	321.319	-1.50709	0.23402	-2.16686	0.0302458	0.703481
ENSMUSG00000031661	Nkd1	protein_coding	8	88521354	naked cuticle 1 homolog (Drosophila)	3903.57	2.11377	0.515662	2.15989	0.0307815	0.713248
ENSMUSG00000070985	Acnat1	protein_coding	4	49447105	acyl-coenzyme A amino acid N-acyltransferase 1	226.307	-1.60807	0.281686	-2.1587	0.0308736	0.714921
ENSMUSG00000063929	Cyp4a32	protein_coding	4	115600969	cytochrome P450, family 4, subfamily a, polypeptide 32	6.53108	-3.46517	1.14338	-2.15604	0.0310802	0.718299
ENSMUSG00000027555	Car13	protein_coding	3	14641727	carbonic anhydrase 13	496.94	-1.36951	0.171465	-2.15499	0.0311626	0.719791
ENSMUSG00000042097	Zfp239	protein_coding	6	117862100	zinc finger protein 239	143.985	-1.64489	0.299328	-2.15447	0.0312036	0.719918
ENSMUSG00000084346	Cyp4a30b	protein_coding	4	115452604	cytochrome P450, family 4, subfamily a, polypeptide 30b	6.6449	-2.34943	0.627923	-2.14904	0.031631	0.727827
ENSMUSG00000057880	Abat	protein_coding	16	8513429	4-aminobutyrate aminotransferase	38.1863	-1.87256	0.406532	-2.14636	0.031844	0.731662
ENSMUSG00000026424	Gpr37l1	protein_coding	1	135160234	G protein-coupled receptor 37-like 1	7.54145	-2.65777	0.773965	-2.14192	0.0322002	0.737698
ENSMUSG00000061878	Sphk1	protein_coding	11	116530925	sphingosine kinase 1	1555.73	2.19864	0.560037	2.14029	0.0323314	0.739807
ENSMUSG00000037188	Grhl3	protein_coding	4	135541888	grainyhead-like 3 (Drosophila)	305.071	-1.9953	0.467357	-2.12963	0.0332021	0.756076
ENSMUSG00000037568	Vash2	protein_coding	1	190947646	vasohibin 2	45.8649	-1.96648	0.456181	-2.11864	0.0341213	0.772915
ENSMUSG00000002475	Abhd3	protein_coding	18	10644411	abhydrolase domain containing 3	103.05	-1.58008	0.274594	-2.11252	0.0346421	0.781718
ENSMUSG00000055629	B4galnt4	protein_coding	7	141061104	beta-1,4-N-acetyl-galactosaminyl transferase 4	29.5054	-2.13908	0.539639	-2.11081	0.0347883	0.784644
ENSMUSG00000024227	Pdzph1	protein_coding	17	58878808	PDZ and pleckstrin homology domains 1	4.00849	-3.36266	1.11974	-2.11	0.0348585	0.785666
ENSMUSG00000028541	B4galt2	protein_coding	4	117869260	UDP-Gal:betaGlcNAc beta 1,4- galactosyltransferase, polypeptide 2	76.3522	1.95325	0.452057	2.10871	0.0349698	0.787799
ENSMUSG00000026535	Ifi202b	protein_coding	1	173962568	interferon activated gene 202B	41.0908	-4.2596	1.55135	-2.10114	0.0356285	0.800541
ENSMUSG00000094018	S100a2	protein_coding	3	90590247	S100 calcium binding protein A2	2.36601	-3.16071	1.03103	-2.09568	0.036111	0.808695
ENSMUSG00000032496	Ltf	protein_coding	9	111019271	lactotransferrin	1091.87	-2.89861	0.908583	-2.08964	0.0366504	0.818257
ENSMUSG00000032735	Ablim3	protein_coding	18	61799395	actin binding LIM protein family, member 3	322.557	2.30315	0.623988	2.08842	0.0367596	0.820501
ENSMUSG00000040181	Fmo1	protein_coding	1	162829561	flavin containing monooxygenase 1	434.353	2.30713	0.626021	2.08799	0.0367986	0.820898
ENSMUSG00000010154	Spire2	protein_coding	8	123332713	spire homolog 2 (Drosophila)	1020.61	-1.54107	0.259706	-2.08338	0.0372168	0.828363
ENSMUSG00000066071	Cyp4a12a	protein_coding	4	115299046	cytochrome P450, family 4, subfamily a, polypeptide 12a	7.99676	-3.35012	1.1284	-2.08271	0.0372781	0.829337
ENSMUSG00000037813	D630003M21Rik	protein_coding	2	158182533	RIKEN cDNA D630003M21 gene	63.8371	-1.80489	0.386796	-2.08091	0.0374417	0.832586
ENSMUSG00000041220	Elovl6	protein_coding	3	129532355	ELOVL family member 6, elongation of long chain fatty acids (yeast)	255.515	-2.14603	0.551676	-2.07735	0.037769	0.838484
ENSMUSG00000070990	Foxe1	protein_coding	4	46343609	forkhead box E1	5.7083	-3.49604	1.20348	-2.07401	0.0380782	0.843953
ENSMUSG00000010796	Asz1	protein_coding	6	18050964	ankyrin repeat, SAM and basic leucine zipper domain containing 1	3.02646	-3.27816	1.09933	-2.07233	0.0382351	0.846844
ENSMUSG00000039997	Ifi203	protein_coding	1	173920407	interferon activated gene 203	155.811	-2.81175	0.874368	-2.07207	0.0382593	0.846985
ENSMUSG00000026670	Uap1	protein_coding	1	170141938	UDP-N-acetylglucosamine pyrophosphorylase 1	2313.95	-1.319	0.154215	-2.06857	0.0385867	0.852835
ENSMUSG00000030584	Dpf1	protein_coding	7	29303951	D4, zinc and double PHD fingers family 1	23.7021	1.70404	0.340641	2.06681	0.0387518	0.856086
ENSMUSG00000032978	Guca2b	protein_coding	4	119656607	guanylate cyclase activator 2b (retina)	6.01207	-3.6001	1.25861	-2.06584	0.0388433	0.857707
ENSMUSG00000073598	1700066B19Rik	protein_coding	18	35703225	RIKEN cDNA 1700066B19 gene	240.756	-1.53408	0.259294	-2.05975	0.0394224	0.868265
ENSMUSG00000034765	Dusp5	protein_coding	19	53529109	dual specificity phosphatase 5	4413.12	-1.68348	0.332673	-2.0545	0.0399271	0.876933
ENSMUSG00000029778	Adcyap1r1	protein_coding	6	55451978	adenylate cyclase activating polypeptide 1 receptor 1	13.7891	-1.97644	0.475859	-2.05196	0.0401733	0.88152
ENSMUSG00000027335	Adra1d	protein_coding	2	131545850	adrenergic receptor, alpha 1d	3.10406	-3.13211	1.03971	-2.05068	0.0402978	0.883483
ENSMUSG00000057534	Elobl	protein_coding	11	88964658	elongin B-like	18.8302	-2.45386	0.709304	-2.0497	0.0403938	0.884924
ENSMUSG00000066009	Zfp987	protein_coding	4	146097298	zinc finger protein 987	3.31693	-5.63347	2.26576	-2.04499	0.0408554	0.892556
ENSMUSG00000050587	Lrrc4c	protein_coding	2	96318169	leucine rich repeat containing 4C	4.08982	-2.79775	0.881636	-2.03911	0.041439	0.902806
ENSMUSG00000034457	Eda2r	protein_coding	X	97333840	ectodysplasin A2 receptor	25.9157	-1.95639	0.469341	-2.03773	0.0415772	0.9054
ENSMUSG00000034324	Tmem132c	protein_coding	5	127241808	transmembrane protein 132C	18.2069	2.96969	0.968276	2.03423	0.0419287	0.910611
ENSMUSG00000022995	Enah	protein_coding	1	181896384	enabled homolog (Drosophila)	156.473	-1.94002	0.463869	-2.02648	0.0427154	0.922964
ENSMUSG00000097569	Gm26640	lincRNA	6	72953236	predicted gene, 26640	4.96481	-2.3888	0.685949	-2.02464	0.0429046	0.926206
ENSMUSG00000055633	Zfp580	protein_coding	7	5051538	zinc finger protein 580	41.6535	1.72468	0.358936	2.01896	0.0434917	0.93568
ENSMUSG00000100457	D830032E09Rik	lincRNA	1	107917259	RIKEN cDNA D830032E09 gene	14.3223	-2.26666	0.628236	-2.01622	0.043777	0.940317
ENSMUSG00000028785	Hpca	protein_coding	4	129111570	hippocalcin	22.3934	-1.69237	0.343519	-2.01552	0.0438503	0.940525
ENSMUSG00000010021	Kif19a	protein_coding	11	114765388	kinesin family member 19A	39.6457	-2.02904	0.511925	-2.01014	0.0444162	0.951245
ENSMUSG00000031886	Ces2e	protein_coding	8	104926260	carboxylesterase 2E	9.91176	-2.85097	0.921878	-2.00783	0.0446615	0.95477
ENSMUSG00000046070	Igfals	protein_coding	17	24878770	insulin-like growth factor binding protein, acid labile subunit	20.1046	2.39661	0.696953	2.00387	0.0450836	0.962271
ENSMUSG00000051727	Kctd14	protein_coding	7	97451323	potassium channel tetramerisation domain containing 14	1673.29	-1.43581	0.217906	-2.00001	0.045499	0.969389
ENSMUSG00000016552	Foxred2	protein_coding	15	77940522	FAD-dependent oxidoreductase domain containing 2	433.22	2.64044	0.820527	1.99925	0.0455817	0.970496
ENSMUSG00000033618	Map3k13	protein_coding	16	21891969	mitogen-activated protein kinase kinase kinase 13	339.882	-1.33273	0.166611	-1.99703	0.0458219	0.974732
ENSMUSG00000111700	AC069561.5	protein_coding	9	38647486		1.30032	-3.78353	1.39377	-1.99713	0.0458112	0.974732
ENSMUSG00000041329	Atp1b2	protein_coding	11	69599736	ATPase, Na+/K+ transporting, beta 2 polypeptide	87.4873	1.73167	0.367759	1.98953	0.0466423	0.988407
ENSMUSG00000004961	Syt5	protein_coding	7	4539765	synaptotagmin V	27.6599	-2.15251	0.579914	-1.98739	0.0468794	0.992099
ENSMUSG00000040978	Gm11992	protein_coding	11	9048594	predicted gene 11992	10.1517	-2.70058	0.855977	-1.98671	0.0469547	0.99347
ENSMUSG00000071745	DXBay18	protein_coding	X	73137232	DNA segment, Chr X, Baylor 18	1.92048	5.21323	3.89581	1.08148	0.279484	1
ENSMUSG00000113322	AC121504.1	lincRNA	13	16368944		2.60333	4.69943	4.13078	0.895575	0.37048	1
ENSMUSG00000113152	AC155634.1	lincRNA	12	64147856		8.24047	4.60603	3.536	1.01981	0.307821	1
ENSMUSG00000089865	Gm44503	protein_coding	9	72958852	predicted readthrough transcript (NMD candidate), 44503	1.05472	4.34827	4.13436	0.809863	0.418019	1
ENSMUSG00000078889	Gm14288	protein_coding	2	175789357	predicted gene 14288	3.60912	4.12096	3.65198	0.854595	0.392775	1
ENSMUSG00000029236	Nmu	protein_coding	5	76333495	neuromedin U	1.15298	4.00023	1.78023	1.68531	0.0919289	1
ENSMUSG00000093769	Hist2h3c1	protein_coding	3	96246685	histone cluster 2, H3c1	1.46445	3.98455	2.84557	1.04884	0.294251	1
ENSMUSG00000078616	Trim30c	protein_coding	7	104382065	tripartite motif-containing 30C	1.02998	3.87982	2.22053	1.2969	0.194664	1
ENSMUSG00000098078	Gm26992	protein_coding	X	103422010	predicted gene, 26992	2.05328	3.83914	1.45101	1.95666	0.0503873	1
ENSMUSG00000062252	Lhfpl5	protein_coding	17	28575718	lipoma HMGIC fusion partner-like 5	1.42484	3.78596	1.55578	1.79072	0.073339	1
ENSMUSG00000110008	Olfr560	protein_coding	7	102751818	olfactory receptor 560	2.53991	3.75217	1.43863	1.91305	0.0557413	1
ENSMUSG00000029219	Slc10a4	protein_coding	5	73006883	solute carrier family 10 (sodium/bile acid cotransporter family), member 4	0.834165	3.59887	2.46082	1.0561	0.290923	1
ENSMUSG00000079386	Gm3173	protein_coding	14	4430992	predicted gene 3173	4.70708	3.57266	1.88789	1.36272	0.172972	1
ENSMUSG00000062694	Cav3	protein_coding	6	112459505	caveolin 3	0.855072	3.54712	1.79848	1.41626	0.156698	1
ENSMUSG00000030865	Chp2	protein_coding	7	122219496	calcineurin-like EF hand protein 2	5.85326	3.54546	1.39337	1.82684	0.0677231	1
ENSMUSG00000100155	Gm2109	lincRNA	9	83691475	predicted gene 2109	1.64576	3.5397	1.66483	1.5255	0.127135	1
ENSMUSG00000060742	Olfr1076	protein_coding	2	86508461	olfactory receptor 1076	0.721648	3.46674	1.58898	1.55241	0.120564	1
ENSMUSG00000109350	Gm44805	protein_coding	7	19671584	predicted gene 44805	1.79699	3.4663	3.58466	0.688015	0.491443	1
ENSMUSG00000059031	Olfr482	protein_coding	7	108092999	olfactory receptor 482	2.88352	3.45724	1.4196	1.73094	0.0834626	1
ENSMUSG00000104824	Gm21663	protein_coding	5	25935791	predicted gene, 21663	0.92909	3.42448	2.56435	0.945457	0.344426	1
ENSMUSG00000020804	Aanat	protein_coding	11	116586432	arylalkylamine N-acetyltransferase	4.88419	3.41386	1.48196	1.62883	0.10335	1
ENSMUSG00000108870	Gm44893	lincRNA	7	132420030	predicted gene 44893	3.3431	3.39156	1.34648	1.77616	0.0757068	1
ENSMUSG00000079343	C1s2	protein_coding	6	124624625	complement component 1, s subcomponent 2	0.93241	3.38888	1.79211	1.333	0.182531	1
ENSMUSG00000049230	Gm9833	protein_coding	3	10088110	predicted gene 9833	1.05861	3.32109	3.90858	0.593844	0.552616	1
ENSMUSG00000086795	Gm11579	lincRNA	1	60776665	predicted gene 11579	0.810729	3.30998	1.73076	1.33466	0.181987	1
ENSMUSG00000037246	H2-M10.5	protein_coding	17	36772910	histocompatibility 2, M region locus 10.5	1.11828	3.30968	1.78792	1.29183	0.196418	1
ENSMUSG00000059821	Olfr847	protein_coding	9	19373668	olfactory receptor 847	1.25055	3.30547	1.36199	1.69273	0.0905077	1
ENSMUSG00000058626	Capn11	protein_coding	17	45630204	calpain 11	4.37241	3.28863	1.36146	1.68101	0.0927603	1
ENSMUSG00000058400	Qrfpr	protein_coding	3	36179424	pyroglutamylated RFamide peptide receptor	1.0332	3.25975	2.05793	1.09807	0.272174	1
ENSMUSG00000091756	Gm3095	protein_coding	14	3963547	predicted gene 3095	0.481362	3.22165	4.15303	0.534946	0.592687	1
ENSMUSG00000059657	Stfa2l1	protein_coding	16	36156811	stefin A2 like 1	2.22942	3.22016	1.50562	1.47459	0.140323	1
ENSMUSG00000097323	4930426I24Rik	lincRNA	12	76402751	RIKEN cDNA 4930426I24 gene	2.27016	3.21867	1.27132	1.74517	0.0809546	1
ENSMUSG00000108854	D830036C21Rik	lincRNA	7	19320117	RIKEN cDNA D830036C21 gene	1.35061	3.21851	1.6137	1.3748	0.169193	1
ENSMUSG00000060807	Serpina6	protein_coding	12	103646630	serine (or cysteine) peptidase inhibitor, clade A, member 6	2.62954	3.17264	1.20971	1.796	0.0724946	1
ENSMUSG00000021441	Cts6	protein_coding	13	61195132	cathepsin 6	0.980014	3.15427	1.66739	1.29201	0.196355	1
ENSMUSG00000079666	1700015F17Rik	protein_coding	5	5437827	RIKEN cDNA 1700015F17 gene	1.25919	3.1482	1.74322	1.23232	0.21783	1
ENSMUSG00000085528	4930401O10Rik	lincRNA	11	71928471	RIKEN cDNA 4930401O10 gene	0.927037	3.14363	1.79305	1.19552	0.231884	1
ENSMUSG00000091206	Vmn2r91	protein_coding	17	18085057	vomeronasal 2, receptor 91	0.497027	3.12658	4.00573	0.530885	0.595499	1
ENSMUSG00000035528	Npffr2	protein_coding	5	89527429	neuropeptide FF receptor 2	7.05934	3.11883	1.26915	1.66949	0.0950207	1
ENSMUSG00000027869	Hsd3b6	protein_coding	3	98805504	hydroxy-delta-5-steroid dehydrogenase, 3 beta- and steroid delta-isomerase 6	0.675551	3.1093	1.8752	1.12484	0.260659	1
ENSMUSG00000070377	Olfr43	protein_coding	11	74205664	olfactory receptor 43	0.604986	3.09633	2.17582	0.963466	0.335314	1
ENSMUSG00000095675	Ccl21b	protein_coding	4	42255767	chemokine (C-C motif) ligand 21B (leucine)	4.61463	3.09101	1.19771	1.74584	0.0808388	1
ENSMUSG00000096596	Gm10591	protein_coding	4	42612195	predicted gene 10591	4.61463	3.09101	1.19771	1.74584	0.0808388	1
ENSMUSG00000030804	Gm21974	protein_coding	7	127886227	predicted gene 21974	0.439801	3.08928	4.15633	0.502674	0.615194	1
ENSMUSG00000092356	Gm20532	protein_coding	2	26586639	predicted gene 20532	1.0814	3.03905	3.90886	0.521648	0.601916	1
ENSMUSG00000111531	AC161054.2	lincRNA	10	93317403		0.755932	3.03421	3.12735	0.650458	0.515396	1
ENSMUSG00000054087	Fbxw28	protein_coding	9	109322886	F-box and WD-40 domain protein 28	1.13898	3.0244	1.58963	1.27351	0.202838	1
ENSMUSG00000056605	Krt72	protein_coding	15	101776172	keratin 72	1.32634	3.01184	1.57435	1.27788	0.20129	1
ENSMUSG00000068218	Ssxb9	protein_coding	X	8366978	synovial sarcoma, X member B9	0.725142	3.00565	3.12768	0.64126	0.521354	1
ENSMUSG00000112761	AC134329.2	lincRNA	10	126962323		2.26467	2.98021	1.25587	1.57677	0.114849	1
ENSMUSG00000046262	C87977	protein_coding	4	144206775	expressed sequence C87977	0.607565	2.95762	2.20318	0.888542	0.374249	1
ENSMUSG00000090747	Esp8	protein_coding	17	40520022	exocrine gland secreted peptide 8	0.854102	2.92783	1.80133	1.07023	0.284518	1
ENSMUSG00000072479	Xlr5b	protein_coding	X	73148796	X-linked lymphocyte-regulated 5B	0.595202	2.92247	3.25862	0.589965	0.555214	1
ENSMUSG00000042655	Fam159b	protein_coding	13	104845283	family with sequence similarity 159, member B	0.694624	2.92064	1.99407	0.963179	0.335457	1
ENSMUSG00000111842	AC163623.2	protein_coding	9	22036380		0.632341	2.91148	4.16231	0.459235	0.646066	1
ENSMUSG00000094449	Olfr972	protein_coding	9	39866422	olfactory receptor 972	2.69907	2.90426	1.17204	1.62474	0.104218	1
ENSMUSG00000071770	Rhox4e	protein_coding	X	37557412	reproductive homeobox 4E	0.500045	2.90209	4.16147	0.457072	0.647619	1
ENSMUSG00000073878	Gm13304	protein_coding	4	42114817	predicted gene 13304	6.83306	2.90149	1.20443	1.57875	0.114393	1
ENSMUSG00000079637	Rhox2c	protein_coding	X	37453680	reproductive homeobox 2C	0.574624	2.8958	2.29303	0.826767	0.408369	1
ENSMUSG00000113320	AC147256.2	lincRNA	12	68896529		0.686945	2.8932	2.00646	0.943548	0.345401	1
ENSMUSG00000097919	Gm27021	protein_coding	8	120608786	predicted gene, 27021	0.381699	2.88945	4.16235	0.453939	0.649873	1
ENSMUSG00000104217	Gm37988	protein_coding	1	4807892	predicted gene, 37988	32.9534	2.88605	2.00886	0.938867	0.347799	1
ENSMUSG00000092162	Vmn2r86	protein_coding	10	130445707	vomeronasal 2, receptor 86	0.68784	2.8741	1.95549	0.958382	0.33787	1
ENSMUSG00000112858	Gm10332	protein_coding	14	54814141	RING finger protein 212B	1.4916	2.8515	1.37333	1.34818	0.177599	1
ENSMUSG00000112865	AC155255.2	lincRNA	12	32390768		0.490729	2.84872	2.58619	0.714843	0.474706	1
ENSMUSG00000110996	AC161590.1	lincRNA	9	113070983		3.26718	2.84864	1.4244	1.29783	0.194344	1
ENSMUSG00000052818	Olfr813	protein_coding	10	129855367	olfactory receptor 813	0.656085	2.84258	1.94388	0.947888	0.343186	1
ENSMUSG00000114073	AC125070.4	protein_coding	13	49784765		2.87829	2.83223	1.11773	1.63924	0.101164	1
ENSMUSG00000079033	Mef2b	protein_coding	8	70152778	myocyte enhancer factor 2B	5.39337	2.82765	1.05824	1.72707	0.0841556	1
ENSMUSG00000069171	Nr2f1	protein_coding	13	78188973	nuclear receptor subfamily 2, group F, member 1	4.78806	2.80429	1.00584	1.79382	0.0728416	1
ENSMUSG00000073226	Gm10482	lincRNA	5	10187866	predicted gene 10482	2.73237	2.79126	1.27026	1.41016	0.158494	1
ENSMUSG00000090538	Gm4775	protein_coding	14	106100753	predicted gene 4775	0.627462	2.783	2.02171	0.881929	0.377815	1
ENSMUSG00000052026	Slc6a7	protein_coding	18	60995381	solute carrier family 6 (neurotransmitter transporter, L-proline), member 7	1.50189	2.77957	1.62512	1.09504	0.2735	1
ENSMUSG00000085690	Gm12629	lincRNA	4	90185527	predicted gene 12629	0.466962	2.77116	3.30388	0.536086	0.591899	1
ENSMUSG00000069867	Pabpn1l	protein_coding	8	122619471	poly(A)binding protein nuclear 1-like	0.873571	2.77083	1.69245	1.04631	0.295417	1
ENSMUSG00000049427	Gm9837	protein_coding	11	53469749	predicted gene 9837	2.06773	2.75133	1.22678	1.42758	0.153413	1
ENSMUSG00000022044	Stmn4	protein_coding	14	66344296	stathmin-like 4	1.50246	2.74414	1.73432	1.00566	0.314579	1
ENSMUSG00000069036	Sry	protein_coding	Y	2662471	sex determining region of Chr Y	0.86543	2.74009	1.88948	0.920938	0.357083	1
ENSMUSG00000099798	Gm29168	lincRNA	17	86840030	predicted gene 29168	1.05385	2.73056	1.55775	1.11093	0.266598	1
ENSMUSG00000097714	Gm20109	lincRNA	17	28522381	predicted gene, 20109	2.58832	2.72651	1.19143	1.4491	0.147309	1
ENSMUSG00000029248	Thegl	protein_coding	5	77016023	theg spermatid protein like	2.14847	2.72451	1.14947	1.50026	0.133547	1
ENSMUSG00000026442	Nfasc	protein_coding	1	132564690	neurofascin	69.969	2.72263	1.34651	1.27933	0.20078	1
ENSMUSG00000032094	Cd3d	protein_coding	9	44981786	CD3 antigen, delta polypeptide	13.3803	2.71912	0.936042	1.83658	0.0662717	1
ENSMUSG00000091022	Gm3115	protein_coding	14	4084120	predicted gene 3115	0.988342	2.71319	1.996	0.85831	0.390721	1
ENSMUSG00000004328	Hif3a	protein_coding	7	17031507	hypoxia inducible factor 3, alpha subunit	270.24	2.71234	0.872575	1.9624	0.0497155	1
ENSMUSG00000034533	Scn10a	protein_coding	9	119608456	sodium channel, voltage-gated, type X, alpha	8.34327	2.70375	1.12536	1.51395	0.130038	1
ENSMUSG00000095101	Gm13285	protein_coding	4	88799665	predicted gene 13285	3.06163	2.70185	1.4974	1.13654	0.255733	1
ENSMUSG00000095743	Gm17654	protein_coding	14	43573843	predicted gene, 17654	0.747864	2.69584	1.85441	0.914487	0.360461	1
ENSMUSG00000023391	Dlx2	protein_coding	2	71543408	distal-less homeobox 2	0.810486	2.68779	1.84156	0.916502	0.359404	1
ENSMUSG00000029235	Pdcl2	protein_coding	5	76312115	phosducin-like 2	0.498286	2.68591	1.93099	0.873079	0.38262	1
ENSMUSG00000040113	Mettl11b	protein_coding	1	163702256	methyltransferase like 11B	1.49886	2.67752	1.64003	1.02286	0.306375	1
ENSMUSG00000091155	Serpine3	protein_coding	14	62663667	serpin peptidase inhibitor, clade E (nexin, plasminogen activator inhibitor type 1), member 3	0.704757	2.67452	1.96076	0.854012	0.393098	1
ENSMUSG00000055746	Magea2	protein_coding	X	155027201	melanoma antigen, family A, 2	0.367505	2.67252	4.16991	0.401093	0.688351	1
ENSMUSG00000024154	Gtf2a1l	protein_coding	17	88668660	general transcription factor IIA, 1-like	0.838511	2.67186	2.02282	0.826498	0.408522	1
ENSMUSG00000110641	Gm45826	protein_coding	8	19140778	predicted gene 45826	1.19018	2.66689	1.99939	0.8337	0.40445	1
ENSMUSG00000050625	Ccdc121	protein_coding	1	181509633	coiled-coil domain containing 121	1.20176	2.65292	1.45864	1.1332	0.257132	1
ENSMUSG00000091227	Gm3755	protein_coding	14	7440924	predicted gene 3755	2.92581	2.64919	1.3849	1.19084	0.233717	1
ENSMUSG00000074424	Gm10696	protein_coding	3	94174412	predicted gene 10696	0.563032	2.64188	1.96998	0.833451	0.40459	1
ENSMUSG00000026616	Cr2	protein_coding	1	195136811	complement receptor 2	48.6184	2.64185	0.954679	1.71979	0.0854704	1
ENSMUSG00000107419	Gm38839	lincRNA	6	81675946	predicted gene, 38839	0.500949	2.64151	2.25362	0.728386	0.466377	1
ENSMUSG00000084907	Gm14505	lincRNA	X	14796735	predicted gene 14505	0.819316	2.64021	1.58041	1.03783	0.299348	1
ENSMUSG00000012520	Phox2b	protein_coding	5	67094399	paired-like homeobox 2b	1.70446	2.63715	1.25363	1.30593	0.191576	1
ENSMUSG00000070366	Plpp4	protein_coding	7	129257031	phospholipid phosphatase 4	1.59279	2.63652	1.67887	0.974774	0.329672	1
ENSMUSG00000107218	Gm42530	lincRNA	5	90922732	predicted gene 42530	1.77594	2.63583	1.49656	1.09306	0.274367	1
ENSMUSG00000107872	Gm44511	protein_coding	6	128780285	predicted gene 44511	1.87978	2.63444	1.60475	1.01851	0.308437	1
ENSMUSG00000047940	Stpg2	protein_coding	3	139205694	sperm tail PG rich repeat containing 2	0.510553	2.6278	2.72961	0.596348	0.550943	1
ENSMUSG00000114304	AC165092.1	lincRNA	14	19271274		0.461764	2.62414	2.28323	0.711334	0.476877	1
ENSMUSG00000045395	Olfr1499	protein_coding	19	13814275	olfactory receptor 1499	0.874544	2.62219	1.8546	0.874686	0.381745	1
ENSMUSG00000096566	Olfr1306	protein_coding	2	111911264	olfactory receptor 1306	0.43926	2.62022	2.20866	0.733574	0.463208	1
ENSMUSG00000037924	Olfr16	protein_coding	1	172950409	olfactory receptor 16	1.82048	2.61791	1.31586	1.22955	0.218867	1
ENSMUSG00000066137	Gm11487	protein_coding	4	73401032	predicted gene 11487	0.567584	2.61772	2.21848	0.729203	0.465878	1
ENSMUSG00000110070	Gm45619	lincRNA	7	45368177	predicted gene 45619	0.741277	2.61704	1.79219	0.902273	0.366912	1
ENSMUSG00000094578	Gm3187	protein_coding	14	5484207	predicted gene 3187	0.436029	2.61591	4.17129	0.387389	0.698468	1
ENSMUSG00000027788	Otol1	protein_coding	3	70007613	otolin 1	1.54775	2.58994	1.34297	1.1839	0.236451	1
ENSMUSG00000075045	Gm4981	protein_coding	10	58234848	predicted gene 4981	0.823363	2.58509	1.68846	0.938778	0.347845	1
ENSMUSG00000087027	Gm13206	lincRNA	4	148306853	predicted gene 13206	1.71023	2.57389	1.49692	1.05142	0.293066	1
ENSMUSG00000037610	Kcnmb2	protein_coding	3	31902507	potassium large conductance calcium-activated channel, subfamily M, beta member 2	5.82266	2.56963	1.31797	1.19095	0.233673	1
ENSMUSG00000047428	Dlk2	protein_coding	17	46297421	delta-like 2 homolog (Drosophila)	26.3472	2.55697	0.896533	1.73666	0.0824471	1
ENSMUSG00000033210	Slc9c1	protein_coding	16	45535309	solute carrier family 9, subfamily C (Na+-transporting carboxylic acid decarboxylase), member 1	1.13856	2.55548	1.62822	0.955322	0.339415	1
ENSMUSG00000106892	Gm42791	protein_coding	5	148893775	predicted gene 42791	15.5567	2.54497	1.30257	1.1861	0.235584	1
ENSMUSG00000045587	BC049730	protein_coding	7	24709242	cDNA sequence BC049730	1.55023	2.52592	1.59486	0.956778	0.338679	1
ENSMUSG00000075593	Gal3st4	protein_coding	5	138264921	galactose-3-O-sulfotransferase 4	1.97753	2.52412	1.48413	1.02695	0.304446	1
ENSMUSG00000051041	Olfml1	protein_coding	7	107567446	olfactomedin-like 1	3.28888	2.5192	1.30571	1.16351	0.244624	1
ENSMUSG00000114092	AC154248.2	lincRNA	13	63794106		0.898684	2.47284	3.12171	0.471806	0.637065	1
ENSMUSG00000086262	A930031H19Rik	lincRNA	4	131000832	RIKEN cDNA A930031H19 gene	1.3212	2.46319	1.40621	1.04052	0.298098	1
ENSMUSG00000112742	AC226737.1	lincRNA	10	130542347		3.81404	2.46128	1.20526	1.21242	0.225353	1
ENSMUSG00000070550	Mrgprb4	protein_coding	7	48198070	MAS-related GPR, member B4	1.63234	2.4502	2.3626	0.613817	0.539336	1
ENSMUSG00000079110	Capn3	protein_coding	2	120456019	calpain 3	24.3049	2.43982	1.22994	1.17065	0.24174	1
ENSMUSG00000091055	Siglec15	protein_coding	18	78043614	sialic acid binding Ig-like lectin 15	0.361056	2.43277	2.75925	0.51926	0.60358	1
ENSMUSG00000097697	4833412C05Rik	lincRNA	7	67784538	RIKEN cDNA 4833412C05 gene	1.43092	2.43215	1.52685	0.937977	0.348256	1
ENSMUSG00000057596	Trim30d	protein_coding	7	104470014	tripartite motif-containing 30D	67.3502	2.43038	1.43299	0.998179	0.318193	1
ENSMUSG00000068604	Gm8225	protein_coding	17	26542760	predicted gene 8225	3.28715	2.42969	0.900747	1.58722	0.112462	1
ENSMUSG00000061961	Olfr815	protein_coding	10	129900570	olfactory receptor 815	0.830849	2.42621	1.70407	0.836942	0.402625	1
ENSMUSG00000040576	Wbscr28	protein_coding	5	134901593	Williams-Beuren syndrome chromosome region 28 (human)	1.23672	2.4213	1.46866	0.967746	0.333171	1
ENSMUSG00000069045	Ddx3y	protein_coding	Y	1260771	DEAD (Asp-Glu-Ala-Asp) box polypeptide 3, Y-linked	618.401	2.41833	1.36075	1.04232	0.297264	1
ENSMUSG00000108579	Gm29918	lincRNA	7	25577074	predicted gene, 29918	0.392406	2.41655	3.34154	0.423922	0.671623	1
ENSMUSG00000051452	Gm11437	protein_coding	11	84148351	predicted gene 11437	0.622341	2.41311	1.86159	0.759088	0.4478	1
ENSMUSG00000078597	Cyp4a12b	protein_coding	4	115411624	cytochrome P450, family 4, subfamily a, polypeptide 12B	7.85068	2.41237	1.24254	1.13668	0.255673	1
ENSMUSG00000097837	Gm26794	lincRNA	2	55433514	predicted gene, 26794	2.37372	2.41045	1.15324	1.22303	0.221317	1
ENSMUSG00000070857	Olfr1113	protein_coding	2	87208970	olfactory receptor 1113	0.772445	2.40743	1.72456	0.816111	0.414437	1
ENSMUSG00000109824	Olfr643	protein_coding	7	103998800	olfactory receptor 643	0.575027	2.40605	2.53086	0.555564	0.578509	1
ENSMUSG00000060204	Gm5868	protein_coding	5	72581638	predicted gene 5868	3.4212	2.39689	0.883619	1.58087	0.113908	1
ENSMUSG00000102123	Gm4319	lincRNA	1	72107155	predicted gene 4319	0.393467	2.393	3.37353	0.412919	0.679666	1
ENSMUSG00000055446	A630091E08Rik	lincRNA	7	98543320	RIKEN cDNA A630091E08 gene	0.624493	2.39285	1.8628	0.74772	0.454629	1
ENSMUSG00000097740	E030044B06Rik	lincRNA	19	40868386	RIKEN cDNA E030044B06 gene	9.84904	2.39196	1.0024	1.38862	0.164947	1
ENSMUSG00000057997	Olfr541	protein_coding	7	140697267	olfactory receptor 541	0.736256	2.39058	1.76175	0.789317	0.429927	1
ENSMUSG00000113010	AC159261.1	lincRNA	13	44472426		0.725847	2.38692	1.60038	0.866624	0.386148	1
ENSMUSG00000091794	Vmn2r18	protein_coding	5	151561661	vomeronasal 2, receptor 18	0.70764	2.38319	1.72306	0.802752	0.422118	1
ENSMUSG00000022126	Acod1	protein_coding	14	103046977	aconitate decarboxylase 1	18.1164	2.37996	0.92436	1.49289	0.135467	1
ENSMUSG00000040065	Pfpl	protein_coding	19	12427905	pore forming protein-like	0.87602	2.37946	1.62572	0.84852	0.396148	1
ENSMUSG00000098684	Gm27246	lincRNA	8	87114645	predicted gene 27246	1.25442	2.37943	1.53034	0.90139	0.367381	1
ENSMUSG00000044534	Ackr2	protein_coding	9	121898355	atypical chemokine receptor 2	23.0582	2.37706	0.943162	1.46005	0.144277	1
ENSMUSG00000107073	4930428D20Rik	lincRNA	16	69796135	RIKEN cDNA 4930428D20 gene	0.594376	2.37651	2.65976	0.517531	0.604786	1
ENSMUSG00000020295	Hbq1a	protein_coding	11	32300069	hemoglobin, theta 1A	0.425718	2.37399	2.30371	0.596424	0.550892	1
ENSMUSG00000107396	4930425L21Rik	lincRNA	6	135658913	RIKEN cDNA 4930425L21 gene	0.919203	2.37137	1.73257	0.791525	0.428638	1
ENSMUSG00000101808	Gm29654	lincRNA	Y	34410916	predicted gene 29654	0.381667	2.37126	4.17982	0.328067	0.742861	1
ENSMUSG00000087211	Lhx1os	lincRNA	11	84525660	LIM homeobox 1, opposite strand	0.48299	2.37042	2.72367	0.503151	0.614858	1
ENSMUSG00000109183	Gm44761	lincRNA	8	9800194	predicted gene 44761	1.49634	2.36871	1.34053	1.02102	0.307246	1
ENSMUSG00000029526	1700123K08Rik	protein_coding	5	138561840	RIKEN cDNA 1700123K08 gene	0.466462	2.36839	1.9876	0.688465	0.49116	1
ENSMUSG00000022878	Adipoq	protein_coding	16	23146536	adiponectin, C1Q and collagen domain containing	0.438388	2.3666	2.2592	0.604903	0.545243	1
ENSMUSG00000033726	Emx1	protein_coding	6	85187438	empty spiracles homeobox 1	0.536779	2.36363	2.02693	0.672757	0.501102	1
ENSMUSG00000094841	Gm10610	lincRNA	7	83536192	predicted gene 10610	2.49319	2.35625	1.08951	1.24483	0.213195	1
ENSMUSG00000096747	Olfr823	protein_coding	10	130111527	olfactory receptor 823	0.764492	2.35181	2.11269	0.639851	0.522269	1
ENSMUSG00000105283	Gm33370	lincRNA	5	96910341	predicted gene, 33370	0.511681	2.34926	2.72702	0.494773	0.62076	1
ENSMUSG00000094638	Gm21972	protein_coding	1	86133637	predicted gene 21972	0.557729	2.34767	4.14946	0.324782	0.745346	1
ENSMUSG00000092609	Gm20481	protein_coding	17	34969912	predicted gene 20481	0.482394	2.34365	2.03059	0.661704	0.508161	1
ENSMUSG00000050870	Mrgprb8	protein_coding	7	48388526	MAS-related GPR, member B8	0.740145	2.34263	1.98615	0.675993	0.499045	1
ENSMUSG00000112060	AC138290.1	lincRNA	10	10122486		0.598793	2.33723	1.81072	0.738505	0.460208	1
ENSMUSG00000086940	Gm12746	lincRNA	4	106841761	predicted gene 12746	1.1478	2.33622	1.65201	0.808842	0.418606	1
ENSMUSG00000100198	1700030O20Rik	lincRNA	10	116723067	RIKEN cDNA 1700030O20 gene	2.3295	2.3358	1.20351	1.10992	0.267033	1
ENSMUSG00000097980	Gm26972	lincRNA	18	63399247	predicted gene, 26972	0.466893	2.3355	1.99778	0.668494	0.503818	1
ENSMUSG00000104752	Gm5565	protein_coding	5	146157802	predicted gene 5565	0.81109	2.33446	2.12199	0.628869	0.529435	1
ENSMUSG00000095563	Astx3	lincRNA	X	126042545	amplified spermatogenic transcripts X encoded 3	0.608842	2.33359	3.33071	0.400394	0.688867	1
ENSMUSG00000021214	Akr1c18	protein_coding	13	4132615	aldo-keto reductase family 1, member C18	1.76441	2.33101	1.2224	1.08885	0.276221	1
ENSMUSG00000111663	AC159809.1	lincRNA	9	85418035		0.427366	2.3284	2.67329	0.496914	0.619249	1
ENSMUSG00000046913	Olfr1451	protein_coding	19	12995014	olfactory receptor 1451	0.528587	2.32818	2.01845	0.658021	0.510525	1
ENSMUSG00000079592	C1qtnf5	protein_coding	9	44107245	C1q and tumor necrosis factor related protein 5	12.866	2.32702	0.966628	1.37283	0.169804	1
ENSMUSG00000032894	1700031F05Rik	protein_coding	X	102859186	RIKEN cDNA 1700031F05 gene	0.475823	2.32286	2.31122	0.572362	0.567077	1
ENSMUSG00000098045	Gm26979	lincRNA	1	137917690	predicted gene, 26979	0.682999	2.32211	2.07775	0.63632	0.524568	1
ENSMUSG00000110430	Cmtm1	protein_coding	8	104292923	CKLF-like MARVEL transmembrane domain containing 1	0.253761	2.32025	4.17266	0.316404	0.751696	1
ENSMUSG00000086068	1700120G11Rik	lincRNA	4	14219496	RIKEN cDNA 1700120G11 gene	0.511294	2.31488	2.25947	0.581939	0.560607	1
ENSMUSG00000094686	Ccl21a	protein_coding	4	42772860	chemokine (C-C motif) ligand 21A (serine)	32.7583	2.30824	0.691003	1.89325	0.0583246	1
ENSMUSG00000072259	Gm5592	protein_coding	7	41153841	predicted gene 5592	0.690794	2.30678	1.83315	0.712863	0.475931	1
ENSMUSG00000070388	Fbxo39	protein_coding	11	72314444	F-box protein 39	0.517315	2.30291	2.75423	0.47306	0.636171	1
ENSMUSG00000029223	Uchl1	protein_coding	5	66676091	ubiquitin carboxy-terminal hydrolase L1	12.9826	2.29942	1.18098	1.10029	0.271207	1
ENSMUSG00000070687	Htr1d	protein_coding	4	136423524	5-hydroxytryptamine (serotonin) receptor 1D	3.26521	2.29806	1.43325	0.905671	0.36511	1
ENSMUSG00000108976	Gm29797	protein_coding	2	181657034	predicted gene, 29797	0.411247	2.29176	2.73307	0.472642	0.636469	1
ENSMUSG00000101229	Gm29046	lincRNA	Y	8144038	predicted gene 29046	0.860306	2.28367	2.86496	0.448059	0.654111	1
ENSMUSG00000090714	Zscan4d	protein_coding	7	11161374	zinc finger and SCAN domain containing 4D	0.344048	2.27781	4.18462	0.30536	0.760092	1
ENSMUSG00000114271	AC154461.1	lincRNA	14	25127788		0.618654	2.27771	1.82904	0.698568	0.484822	1
ENSMUSG00000025038	Efhc2	protein_coding	X	17132049	EF-hand domain (C-terminal) containing 2	4.59222	2.27716	0.796963	1.60254	0.109037	1
ENSMUSG00000029664	Tfpi2	protein_coding	6	3962595	tissue factor pathway inhibitor 2	1.91126	2.2762	1.1338	1.1256	0.260334	1
ENSMUSG00000069049	Eif2s3y	protein_coding	Y	1010543	eukaryotic translation initiation factor 2, subunit 3, structural gene Y-linked	922.16	2.2741	1.54508	0.824619	0.409588	1
ENSMUSG00000024529	Lox	protein_coding	18	52516069	lysyl oxidase	20.4962	2.26111	0.676037	1.86544	0.0621191	1
ENSMUSG00000040896	Kcnd3	protein_coding	3	105452330	potassium voltage-gated channel, Shal-related family, member 3	47.5632	2.25244	1.45694	0.859636	0.38999	1
ENSMUSG00000073640	Rpl27-ps3	protein_coding	18	6332590	ribosomal protein L27, pseudogene 3	10.6143	2.25145	1.00622	1.24372	0.213603	1
ENSMUSG00000070837	Aurkc	protein_coding	7	6995300	aurora kinase C	1.5396	2.24868	1.73439	0.71995	0.471555	1
ENSMUSG00000101435	Gm28772	lincRNA	Y	38376499	predicted gene 28772	0.518583	2.24697	2.27451	0.548235	0.58353	1
ENSMUSG00000060044	Tmem26	protein_coding	10	68723646	transmembrane protein 26	5.74232	2.24245	0.834034	1.48968	0.136308	1
ENSMUSG00000022816	Fstl1	protein_coding	16	37776873	follistatin-like 1	216.729	2.24081	0.674548	1.83947	0.0658468	1
ENSMUSG00000021294	Kif26a	protein_coding	12	112146208	kinesin family member 26A	15.9547	2.23658	0.781148	1.58303	0.113414	1
ENSMUSG00000026042	Col5a2	protein_coding	1	45374321	collagen, type V, alpha 2	72.5175	2.2359	0.683072	1.80933	0.0704003	1
ENSMUSG00000025272	Tro	protein_coding	X	150645304	trophinin	4.939	2.23557	1.12184	1.10137	0.270734	1
ENSMUSG00000028492	Saxo1	protein_coding	4	86444641	stabilizer of axonemal microtubules 1	1.02875	2.22975	1.93392	0.635883	0.524853	1
ENSMUSG00000038151	Prdm1	protein_coding	10	44437177	PR domain containing 1, with ZNF domain	74.5028	2.22867	0.753153	1.63136	0.102814	1
ENSMUSG00000105316	Gm42953	lincRNA	5	126797255	predicted gene 42953	0.71886	2.22474	1.77282	0.690847	0.489662	1
ENSMUSG00000029182	1700001C02Rik	protein_coding	5	30466047	RIKEN cDNA 1700001C02 gene	3.07202	2.22359	0.937282	1.30547	0.191733	1
ENSMUSG00000100783	2310047D07Rik	lincRNA	5	149231332	RIKEN cDNA 2310047D07 gene	1.57383	2.22075	1.34086	0.910426	0.362598	1
ENSMUSG00000036749	Pramel5	protein_coding	4	144270633	preferentially expressed antigen in melanoma like 5	0.656217	2.21172	2.08958	0.579886	0.561991	1
ENSMUSG00000075110	Olfr1214	protein_coding	2	88986479	olfactory receptor 1214	1.17752	2.20357	1.46177	0.823365	0.410301	1
ENSMUSG00000079597	Gm5483	protein_coding	16	36184212	predicted gene 5483	1.14927	2.20239	1.83246	0.656164	0.511718	1
ENSMUSG00000100796	Gm28163	lincRNA	2	165601463	predicted gene 28163	0.593725	2.20201	2.32784	0.516364	0.6056	1
ENSMUSG00000052730	Gm5111	protein_coding	6	48589445	predicted gene 5111	1.44075	2.19012	1.44511	0.823553	0.410193	1
ENSMUSG00000097374	Gm26874	lincRNA	19	57459572	predicted gene, 26874	1.78527	2.18842	1.36123	0.873046	0.382638	1
ENSMUSG00000099201	Gm27187	lincRNA	9	35960687	predicted gene 27187	0.49719	2.1864	2.64512	0.448523	0.653776	1
ENSMUSG00000051879	Krt71	protein_coding	15	101733950	keratin 71	0.700142	2.18631	1.98453	0.59778	0.549987	1
ENSMUSG00000112713	AC122301.3	lincRNA	10	10100420		2.56746	2.18501	1.15109	1.02947	0.303259	1
ENSMUSG00000097998	Gm27019	lincRNA	6	31063092	predicted gene, 27019	1.21061	2.18108	1.52337	0.775311	0.438156	1
ENSMUSG00000106795	Gm43050	lincRNA	5	119828448	predicted gene 43050	1.03711	2.17974	1.98752	0.593575	0.552797	1
ENSMUSG00000031364	Grpr	protein_coding	X	163513904	gastrin releasing peptide receptor	1.73448	2.17756	1.12324	1.04837	0.29447	1
ENSMUSG00000096284	Tcstv1	protein_coding	13	119893388	2-cell-stage, variable group, member 1	0.492297	2.17276	1.95118	0.60105	0.547806	1
ENSMUSG00000079265	Gm8257	protein_coding	14	44649204	predicted pseudogene 8257	1.81415	2.17134	1.22326	0.957551	0.338289	1
ENSMUSG00000045148	Olfr1255	protein_coding	2	89812051	olfactory receptor 1255	1.01902	2.16943	1.8572	0.629675	0.528907	1
ENSMUSG00000070877	Ldlrad1	protein_coding	4	107209180	low density lipoprotein receptor class A domain containing 1	4.30375	2.16899	0.902824	1.29482	0.195384	1
ENSMUSG00000101394	Gm28183	lincRNA	2	117802117	predicted gene 28183	0.961696	2.16685	1.49223	0.78195	0.434244	1
ENSMUSG00000069267	Hist1h3b	protein_coding	13	23752267	histone cluster 1, H3b	2.57933	2.16642	1.69758	0.687112	0.492012	1
ENSMUSG00000053211	Zfy1	protein_coding	Y	725128	zinc finger protein 1, Y-linked	0.725175	2.15062	1.77641	0.647719	0.517167	1
ENSMUSG00000075214	Olfr1002	protein_coding	2	85646057	olfactory receptor 1002	0.637895	2.14926	1.75576	0.654563	0.512749	1
ENSMUSG00000091662	Vmn1r69	protein_coding	7	10579756	vomeronasal 1 receptor 69	0.629278	2.14857	2.21265	0.519093	0.603696	1
ENSMUSG00000102762	4930403P22Rik	lincRNA	1	36332708	RIKEN cDNA 4930403P22 gene	1.12923	2.13693	1.57641	0.721215	0.470777	1
ENSMUSG00000026390	Marco	protein_coding	1	120474538	macrophage receptor with collagenous structure	298.831	2.13581	0.75986	1.49476	0.134978	1
ENSMUSG00000097823	Gm16701	lincRNA	1	166998295	predicted gene, 16701	4.78103	2.13234	0.962309	1.17669	0.239321	1
ENSMUSG00000027004	Frzb	protein_coding	2	80411970	frizzled-related protein	4.58181	2.12989	0.969164	1.16584	0.243677	1
ENSMUSG00000022388	Ttll8	protein_coding	15	88890633	tubulin tyrosine ligase-like family, member 8	5.37006	2.12809	0.874057	1.29064	0.196829	1
ENSMUSG00000025051	Samt4	protein_coding	X	154482002	spermatogenesis associated multipass transmembrane protein 4	0.772461	2.12745	1.62754	0.692735	0.488476	1
ENSMUSG00000103503	1700023G09Rik	lincRNA	1	186926933	RIKEN cDNA 1700023G09 gene	2.06648	2.12225	1.393	0.805631	0.420456	1
ENSMUSG00000111732	Olfr785	protein_coding	10	129405426	olfactory receptor 785	0.947968	2.12175	1.71487	0.654131	0.513028	1
ENSMUSG00000073012	Fnd3c2	protein_coding	X	106235246	fibronectin type III domain containing 3C2	0.656044	2.11728	1.95343	0.57196	0.567349	1
ENSMUSG00000071322	Tcp10a	protein_coding	17	7324646	t-complex protein 10a	1.37841	2.11473	1.87033	0.596005	0.551172	1
ENSMUSG00000022803	Popdc2	protein_coding	16	38362209	popeye domain containing 2	9.68561	2.11296	0.885361	1.25707	0.208729	1
ENSMUSG00000061540	Orm2	protein_coding	4	63362449	orosomucoid 2	27.1066	2.10807	0.740921	1.49553	0.134775	1
ENSMUSG00000066537	Vmn2r57	protein_coding	7	41399732	vomeronasal 2, receptor 57	0.756591	2.10806	1.93452	0.572784	0.566791	1
ENSMUSG00000068149	Tex13c3	protein_coding	X	19479420	TEX13 family member C3	1.89823	2.10718	1.241	0.892171	0.372301	1
ENSMUSG00000074062	Fbxw16	protein_coding	9	109432316	F-box and WD-40 domain protein 16	0.430445	2.10105	3.20699	0.343328	0.731351	1
ENSMUSG00000033770	Clcnka	protein_coding	4	141384610	chloride channel, voltage-sensitive Ka	162.634	2.09975	0.895426	1.22819	0.219377	1
ENSMUSG00000073947	Olfr615	protein_coding	7	103556079	olfactory receptor 615	1.01161	2.09765	2.1196	0.517856	0.604559	1
ENSMUSG00000091059	Vmn2r14	protein_coding	5	109215502	vomeronasal 2, receptor 14	0.696451	2.09764	2.08124	0.527397	0.597918	1
ENSMUSG00000037892	Pcdh18	protein_coding	3	49743296	protocadherin 18	7.59087	2.09659	0.722768	1.51721	0.129213	1
ENSMUSG00000021575	Ahrr	protein_coding	13	74211118	aryl-hydrocarbon receptor repressor	21.3752	2.09653	0.681093	1.60996	0.107406	1
ENSMUSG00000028348	Cavin4	protein_coding	4	48663514	caveolae associated 4	13.645	2.09268	0.938965	1.1637	0.244545	1
ENSMUSG00000005864	Cnga2	protein_coding	X	71991849	cyclic nucleotide gated channel alpha 2	40.1255	2.08482	0.569447	1.90503	0.0567758	1
ENSMUSG00000024675	Ms4a4c	protein_coding	19	11404770	membrane-spanning 4-domains, subfamily A, member 4C	7.54966	2.08056	0.867558	1.24551	0.212943	1
ENSMUSG00000038248	Sobp	protein_coding	10	43002500	sine oculis-binding protein homolog (Drosophila)	6.50947	2.07988	0.82505	1.30886	0.190581	1
ENSMUSG00000109734	Gm45272	lincRNA	7	104908754	predicted gene 45272	1.60111	2.07876	1.59581	0.675992	0.499046	1
ENSMUSG00000052469	Tcp10c	protein_coding	17	13354572	t-complex protein 10c	0.955208	2.07868	2.28488	0.472095	0.636859	1
ENSMUSG00000024903	Lao1	protein_coding	4	118961578	L-amino acid oxidase 1	0.758319	2.06979	1.50426	0.711175	0.476976	1
ENSMUSG00000097584	1700125G22Rik	lincRNA	3	27154026	RIKEN cDNA 1700125G22 gene	1.38882	2.0645	1.32656	0.802455	0.42229	1
ENSMUSG00000086413	Gm12415	lincRNA	4	84741475	predicted gene 12415	1.40743	2.06317	1.28155	0.829598	0.406766	1
ENSMUSG00000029420	Rimbp2	protein_coding	5	128757791	RIMS binding protein 2	14.717	2.063	0.866787	1.22637	0.220059	1
ENSMUSG00000050876	Spata31d1a	protein_coding	13	59699806	spermatogenesis associated 31 subfamily D, member 1A	66.3264	2.05449	0.619544	1.70205	0.0887466	1
ENSMUSG00000051056	Gja10	protein_coding	4	32596960	gap junction protein, alpha 10	1.78642	2.05047	1.17462	0.894307	0.371158	1
ENSMUSG00000070531	Wfdc6b	protein_coding	2	164613522	WAP four-disulfide core domain 6B	0.388798	2.03866	3.45221	0.30087	0.763514	1
ENSMUSG00000110464	1700061N14Rik	lincRNA	8	47811724	RIKEN cDNA 1700061N14 gene	2.00657	2.03818	1.33487	0.77774	0.436722	1
ENSMUSG00000060459	Kng2	protein_coding	16	22985854	kininogen 2	1829.45	2.03659	0.587717	1.76376	0.077773	1
ENSMUSG00000004988	Fxyd4	protein_coding	6	117933559	FXYD domain-containing ion transport regulator 4	465.92	2.03439	0.839416	1.23227	0.217849	1
ENSMUSG00000079012	Serpina3m	protein_coding	12	104338486	serine (or cysteine) peptidase inhibitor, clade A, member 3M	2.42643	2.03274	1.53354	0.673435	0.50067	1
ENSMUSG00000050058	Prm3	protein_coding	16	10790505	protamine 3	0.435649	2.02915	2.77021	0.371508	0.710259	1
ENSMUSG00000113259	AC132239.1	lincRNA	13	3762282		0.89228	2.02673	2.38175	0.431081	0.666409	1
ENSMUSG00000002007	Srpk3	protein_coding	X	73774405	serine/arginine-rich protein specific kinase 3	4.9857	2.02619	1.0165	1.00953	0.31272	1
ENSMUSG00000009356	Lpo	protein_coding	11	87806428	lactoperoxidase	8.60572	2.02612	1.61691	0.63462	0.525676	1
ENSMUSG00000045876	Pcdhb8	protein_coding	18	37355121	protocadherin beta 8	3.72236	2.02515	1.14179	0.897845	0.369268	1
ENSMUSG00000110042	Gm4224	lincRNA	7	12221316	predicted gene 4224	1.33341	2.02268	1.41143	0.724569	0.468717	1
ENSMUSG00000052981	Ube2ql1	protein_coding	13	69702832	ubiquitin-conjugating enzyme E2Q family-like 1	1.02	2.01881	1.71132	0.595335	0.551619	1
ENSMUSG00000051910	Sox6	protein_coding	7	115470872	SRY (sex determining region Y)-box 6	64.7624	2.01793	0.879655	1.1572	0.247193	1
ENSMUSG00000051159	Cited1	protein_coding	X	102247381	Cbp/p300-interacting transactivator with Glu/Asp-rich carboxy-terminal domain 1	3.90205	2.01703	0.867633	1.17219	0.241122	1
ENSMUSG00000111409	Rnf26	protein_coding	9	44066327	ring finger protein 26	2.05891	2.01415	2.27224	0.446322	0.655365	1
ENSMUSG00000030996	Art1	protein_coding	7	102101743	ADP-ribosyltransferase 1	4.68069	2.01319	1.08915	0.930258	0.352237	1
ENSMUSG00000085989	Gm7437	lincRNA	X	30373539	predicted gene 7437	0.411195	2.01153	3.35465	0.301532	0.763009	1
ENSMUSG00000090053	Palm2	protein_coding	4	57434247	paralemmin 2	12.2306	2.01086	1.02327	0.987875	0.323214	1
ENSMUSG00000078235	Fam43b	protein_coding	4	138394092	family with sequence similarity 43, member B	0.570821	2.00119	1.74902	0.572431	0.56703	1
ENSMUSG00000074449	Gm15319	protein_coding	8	20337664	predicted gene 15319	1.58644	2.00113	2.25944	0.443086	0.657704	1
ENSMUSG00000058856	Olfr952	protein_coding	9	39426093	olfactory receptor 952	0.935188	1.99539	1.56281	0.636921	0.524176	1
ENSMUSG00000064063	BC048507	protein_coding	13	67863326	cDNA sequence BC048507	0.845662	1.99471	1.65988	0.599268	0.548994	1
ENSMUSG00000022464	Slc38a4	protein_coding	15	96994823	solute carrier family 38, member 4	206.877	1.9946	0.62192	1.59924	0.109767	1
ENSMUSG00000069733	Ube2u	protein_coding	4	100478849	ubiquitin-conjugating enzyme E2U (putative)	0.35444	1.9917	3.46345	0.286334	0.774622	1
ENSMUSG00000073610	Gm10549	protein_coding	18	33464163	predicted gene 10549	0.774429	1.99005	1.853	0.534296	0.593137	1
ENSMUSG00000086963	Gm14135	lincRNA	2	149257277	predicted gene 14135	0.78809	1.98707	2.58534	0.381795	0.702614	1
ENSMUSG00000067561	Dmrtc1c2	protein_coding	X	102847639	DMRT-like family C1c2	0.38526	1.97612	2.38916	0.408561	0.682862	1
ENSMUSG00000031786	Drc7	protein_coding	8	95055103	dynein regulatory complex subunit 7	3.86723	1.97455	1.00729	0.967495	0.333297	1
ENSMUSG00000087006	Gm13889	protein_coding	2	93955810	predicted gene 13889	20.468	1.97418	0.579181	1.682	0.0925682	1
ENSMUSG00000068457	Uty	protein_coding	Y	1096861	ubiquitously transcribed tetratricopeptide repeat gene, Y chromosome	245.742	1.97415	1.0157	0.959094	0.337511	1
ENSMUSG00000031495	Cd209d	protein_coding	8	3871824	CD209d antigen	1.09017	1.97122	1.53103	0.634362	0.525845	1
ENSMUSG00000025056	Nr0b1	protein_coding	X	86191764	nuclear receptor subfamily 0, group B, member 1	0.429985	1.97018	2.38216	0.40727	0.68381	1
ENSMUSG00000022584	Ly6c2	protein_coding	15	75108158	lymphocyte antigen 6 complex, locus C2	580.313	1.96991	0.531394	1.82521	0.0679688	1
ENSMUSG00000059406	Tmprss9	protein_coding	10	80871848	transmembrane protease, serine 9	2.71899	1.96939	1.09445	0.885738	0.375759	1
ENSMUSG00000113173	AC192334.1	lincRNA	13	65994049		1.02748	1.96827	1.45542	0.665282	0.50587	1
ENSMUSG00000111878	AC166060.1	lincRNA	9	33482183		0.670521	1.96707	1.57808	0.612814	0.539999	1
ENSMUSG00000015365	Mov10l1	protein_coding	15	88982909	Moloney leukemia virus 10-like 1	5.94383	1.96664	1.32844	0.727651	0.466827	1
ENSMUSG00000041616	Nppa	protein_coding	4	148000722	natriuretic peptide type A	0.7411	1.96496	1.89074	0.510358	0.609801	1
ENSMUSG00000053863	Mepe	protein_coding	5	104325329	matrix extracellular phosphoglycoprotein with ASARM motif (bone)	0.718723	1.96453	1.82544	0.528384	0.597233	1
ENSMUSG00000085856	Gm12050	lincRNA	11	22438821	predicted gene 12050	1.08141	1.96173	1.40375	0.685118	0.49327	1
ENSMUSG00000047293	Gpr15	protein_coding	16	58717435	G protein-coupled receptor 15	1.07725	1.96109	1.69646	0.566527	0.571036	1
ENSMUSG00000006221	Hspb7	protein_coding	4	141420779	heat shock protein family, member 7 (cardiovascular)	6.54969	1.96003	0.758477	1.26573	0.205609	1
ENSMUSG00000023930	Crisp2	protein_coding	17	40764734	cysteine-rich secretory protein 2	8.96385	1.95446	0.645142	1.47946	0.139017	1
ENSMUSG00000087460	4930401O12Rik	lincRNA	13	31213410	RIKEN cDNA 4930401O12 gene	0.362128	1.95371	2.37254	0.401978	0.6877	1
ENSMUSG00000104397	Gm37958	lincRNA	1	34329433	predicted gene, 37958	0.4766	1.95279	2.07336	0.459538	0.645848	1
ENSMUSG00000003476	Crhr2	protein_coding	6	55090049	corticotropin releasing hormone receptor 2	1.62812	1.95264	1.61109	0.591301	0.554319	1
ENSMUSG00000038760	Trhr	protein_coding	15	44196135	thyrotropin releasing hormone receptor	1.76694	1.951	1.14782	0.828529	0.407371	1
ENSMUSG00000025129	Ppp1r27	protein_coding	11	120549979	protein phosphatase 1, regulatory subunit 27	0.952889	1.94968	1.43247	0.662965	0.507353	1
ENSMUSG00000113013	AC155241.1	lincRNA	12	11781535		0.642639	1.94943	2.07583	0.457373	0.647403	1
ENSMUSG00000086713	4930407G08Rik	lincRNA	4	107953932	RIKEN cDNA 4930407G08 gene	0.336867	1.94817	2.81808	0.336458	0.736525	1
ENSMUSG00000075127	Olfr1179	protein_coding	2	88401859	olfactory receptor 1179	0.437226	1.94435	2.06443	0.457438	0.647356	1
ENSMUSG00000049387	Cox7b2	protein_coding	5	71442824	cytochrome c oxidase subunit VIIb2	0.414938	1.94407	2.07059	0.455944	0.64843	1
ENSMUSG00000094814	Gm21973	protein_coding	15	10325380	predicted gene 21973	0.495821	1.94331	2.68451	0.351392	0.725295	1
ENSMUSG00000026241	Nppc	protein_coding	1	86666291	natriuretic peptide type C	0.925799	1.9388	1.43332	0.654983	0.512479	1
ENSMUSG00000105664	Gm42797	lincRNA	5	113928555	predicted gene 42797	0.815211	1.93834	1.56933	0.597925	0.54989	1
ENSMUSG00000074852	Hpse2	protein_coding	19	42788947	heparanase 2	0.381661	1.93786	2.79311	0.335776	0.73704	1
ENSMUSG00000069722	Krtap3-3	protein_coding	11	99550130	keratin associated protein 3-3	0.431107	1.93744	2.65468	0.353128	0.723992	1
ENSMUSG00000096764	Gm21985	protein_coding	2	112266314	predicted gene 21985	25.2049	1.93667	1.6165	0.579442	0.562291	1
ENSMUSG00000094328	Gm9125	protein_coding	3	94047981	predicted gene 9125	1.89692	1.93491	2.33904	0.3997	0.689377	1
ENSMUSG00000045693	Nlrp4e	protein_coding	7	23301192	NLR family, pyrin domain containing 4E	2.63488	1.9325	1.2735	0.732234	0.464026	1
ENSMUSG00000029679	Hyal6	protein_coding	6	24733245	hyaluronoglucosaminidase 6	1.31317	1.9318	1.352	0.689199	0.490698	1
ENSMUSG00000023046	Igfbp6	protein_coding	15	102144362	insulin-like growth factor binding protein 6	1671.18	1.93082	0.498262	1.86814	0.0617425	1
ENSMUSG00000045835	Hdgfl1	protein_coding	13	26768173	hepatoma derived growth factor-like 1	0.925353	1.93041	1.71134	0.543674	0.586666	1
ENSMUSG00000032451	Trim42	protein_coding	9	97349562	tripartite motif-containing 42	0.678502	1.93008	2.05727	0.452096	0.6512	1
ENSMUSG00000108550	Gm44736	lincRNA	7	73670299	predicted gene 44736	0.574365	1.92814	1.7625	0.526604	0.598468	1
ENSMUSG00000114786	CT025579.2	lincRNA	14	11460359		0.486021	1.92783	2.73276	0.339522	0.734217	1
ENSMUSG00000114436	AC130831.1	lincRNA	14	19866980		0.386146	1.9277	4.16974	0.222483	0.823938	1
ENSMUSG00000021977	1700129C05Rik	protein_coding	14	59133040	RIKEN cDNA 1700129C05 gene	1.10762	1.92629	1.58256	0.58531	0.558339	1
ENSMUSG00000107681	4930528H21Rik	lincRNA	6	4031841	RIKEN cDNA 4930528H21 gene	0.449161	1.92569	2.66159	0.347796	0.727994	1
ENSMUSG00000036211	Hist1h1t	protein_coding	13	23695814	histone cluster 1, H1t	0.733653	1.92475	1.89914	0.486933	0.626305	1
ENSMUSG00000110851	AC155813.1	lincRNA	9	27616185		0.812597	1.92428	1.90977	0.483975	0.628403	1
ENSMUSG00000044544	4921513I03Rik	lincRNA	10	120765732	RIKEN cDNA 4921513I03 gene	2.79061	1.9231	1.35742	0.680041	0.496478	1
ENSMUSG00000085097	Gm13049	lincRNA	4	150825733	predicted gene 13049	1.40258	1.92135	1.92017	0.47983	0.631348	1
ENSMUSG00000107305	Gm43262	lincRNA	13	53403950	predicted gene 43262	0.583404	1.92013	2.66669	0.345044	0.730061	1
ENSMUSG00000086257	4930548K13Rik	lincRNA	4	26635820	RIKEN cDNA 4930548K13 gene	1.2249	1.91997	1.44341	0.637357	0.523892	1
ENSMUSG00000079636	Rhox3c	protein_coding	X	37458585	reproductive homeobox 3C	0.757737	1.91952	2.12701	0.432305	0.665519	1
ENSMUSG00000035352	Ccl12	protein_coding	11	82101845	chemokine (C-C motif) ligand 12	1.59822	1.91945	1.51322	0.607612	0.543445	1
ENSMUSG00000044708	Kcnj10	protein_coding	1	172341210	potassium inwardly-rectifying channel, subfamily J, member 10	200.973	1.91719	0.568813	1.61246	0.106861	1
ENSMUSG00000044560	Olfr1302	protein_coding	2	111777429	olfactory receptor 1302	0.780263	1.91686	1.79495	0.510801	0.60949	1
ENSMUSG00000032079	Apoa5	protein_coding	9	46268633	apolipoprotein A-V	3.47972	1.91529	1.6527	0.553814	0.579706	1
ENSMUSG00000058618	AY761184	protein_coding	8	21702519	cDNA sequence AY761184	0.335765	1.91451	4.20336	0.217567	0.827766	1
ENSMUSG00000085252	8430437L04Rik	lincRNA	2	72703510	RIKEN cDNA 8430437L04 gene	0.84478	1.91449	1.79901	0.508328	0.611223	1
ENSMUSG00000050783	Htr1f	protein_coding	16	64924729	5-hydroxytryptamine (serotonin) receptor 1F	0.391284	1.91432	2.79835	0.326737	0.743867	1
ENSMUSG00000029155	Spata18	protein_coding	5	73651379	spermatogenesis associated 18	3.80112	1.9107	1.08414	0.84002	0.400897	1
ENSMUSG00000071019	Sdr16c6	protein_coding	4	4055929	short chain dehydrogenase/reductase family 16C, member 6	0.850996	1.90713	2.102	0.431558	0.666063	1
ENSMUSG00000075015	Gm10801	protein_coding	2	98662237	predicted gene 10801	0.883538	1.90698	2.33501	0.388425	0.697702	1
ENSMUSG00000000686	Abhd15	protein_coding	11	77515121	abhydrolase domain containing 15	9.67997	1.90522	0.641857	1.41032	0.158447	1
ENSMUSG00000024678	Ms4a4d	protein_coding	19	11536801	membrane-spanning 4-domains, subfamily A, member 4D	4.6623	1.90466	0.886192	1.02084	0.307331	1
ENSMUSG00000073923	Olfr657	protein_coding	7	104624794	olfactory receptor 657	0.651711	1.90463	1.77088	0.510838	0.609464	1
ENSMUSG00000043485	Krt34	protein_coding	11	100037347	keratin 34	0.747284	1.90345	2.03827	0.443244	0.657589	1
ENSMUSG00000112977	AC107681.1	lincRNA	12	109493529		1.42816	1.90311	1.23314	0.732362	0.463948	1
ENSMUSG00000045539	Sprr3	protein_coding	3	92456502	small proline-rich protein 3	1.07517	1.90262	1.59857	0.564645	0.572316	1
ENSMUSG00000068887	Lce1j	protein_coding	3	92788840	late cornified envelope 1J	1.10895	1.90127	1.8329	0.491718	0.622918	1
ENSMUSG00000112519	AC153937.5	lincRNA	10	95714001		1.34114	1.90126	1.63721	0.550485	0.581986	1
ENSMUSG00000045620	Odf3l1	protein_coding	9	56848659	outer dense fiber of sperm tails 3-like 1	0.408155	1.89987	2.38073	0.37798	0.705446	1
ENSMUSG00000066141	Gm11232	protein_coding	4	71755643	predicted gene 11232	0.438993	1.89885	2.02865	0.443079	0.657709	1
ENSMUSG00000006014	Prg4	protein_coding	1	150449412	proteoglycan 4 (megakaryocyte stimulating factor, articular superficial zone protein)	248.323	1.89775	0.811882	1.10577	0.268828	1
ENSMUSG00000086547	Gm11755	lincRNA	11	119123011	predicted gene 11755	0.673512	1.89708	2.0313	0.441632	0.658756	1
ENSMUSG00000036925	Mucl2	protein_coding	15	103895859	mucin-like 2	0.52055	1.89702	1.77631	0.504991	0.613565	1
ENSMUSG00000111253	AC159886.3	lincRNA	9	77807036		0.371069	1.89494	3.41519	0.262048	0.793285	1
ENSMUSG00000059134	Olfr814	protein_coding	10	129871473	olfactory receptor 814	0.875041	1.8941	1.87873	0.475905	0.634142	1
ENSMUSG00000022991	Lalba	protein_coding	15	98480400	lactalbumin, alpha	0.482948	1.89275	2.09442	0.426252	0.669924	1
ENSMUSG00000044814	Olfr543	protein_coding	7	102476579	olfactory receptor 543	0.659101	1.89062	2.08749	0.426647	0.669636	1
ENSMUSG00000028008	Asic5	protein_coding	3	81982290	acid-sensing (proton-gated) ion channel family member 5	0.536085	1.89054	2.08087	0.427964	0.668677	1
ENSMUSG00000044903	Psg22	protein_coding	7	18718090	pregnancy-specific glycoprotein 22	0.630947	1.89015	3.35113	0.265626	0.790527	1
ENSMUSG00000033214	Slitrk5	protein_coding	14	111675115	SLIT and NTRK-like family, member 5	1.24202	1.88993	1.49989	0.593331	0.55296	1
ENSMUSG00000111682	AC123069.1	lincRNA	9	49954878		1.53364	1.88814	1.30758	0.679221	0.496998	1
ENSMUSG00000038236	Hoxa7	protein_coding	6	52214491	homeobox A7	3.68274	1.88752	0.972153	0.912946	0.361271	1
ENSMUSG00000084979	Gm16267	lincRNA	12	33111962	predicted gene 16267	0.339139	1.88327	2.38298	0.37066	0.710891	1
ENSMUSG00000041696	Rasl12	protein_coding	9	65398506	RAS-like, family 12	1222.48	1.88259	0.539341	1.63643	0.10175	1
ENSMUSG00000092244	Esp34	protein_coding	17	38554192	exocrine gland secreted peptide 34	0.335675	1.88249	2.84075	0.310655	0.756063	1
ENSMUSG00000086957	Gm13869	lincRNA	2	103206209	predicted gene 13869	1.65627	1.87977	1.22808	0.716374	0.473761	1
ENSMUSG00000107232	1700017L05Rik	lincRNA	5	77465488	RIKEN cDNA 1700017L05 gene	0.488795	1.87905	2.35636	0.373053	0.709109	1
ENSMUSG00000024653	Scgb1a1	protein_coding	19	9083636	secretoglobin, family 1A, member 1 (uteroglobin)	2963.85	1.87402	0.53877	1.62226	0.104748	1
ENSMUSG00000066867	Oas1e	protein_coding	5	120786226	2'-5' oligoadenylate synthetase 1E	4.16571	1.8739	1.11964	0.780519	0.435085	1
ENSMUSG00000110636	Gm39397	lincRNA	11	103421736	predicted gene, 39397	0.607435	1.87344	2.06014	0.42397	0.671588	1
ENSMUSG00000017767	Spata25	protein_coding	2	164826389	spermatogenesis associated 25	0.450074	1.87312	2.25828	0.386629	0.699031	1
ENSMUSG00000113652	AC122313.3	lincRNA	13	50753391		1.28586	1.87302	1.44265	0.605148	0.545081	1
ENSMUSG00000035095	Fam167a	protein_coding	14	63436394	family with sequence similarity 167, member A	322.423	1.87194	0.49621	1.7572	0.0788839	1
ENSMUSG00000059824	Dbp	protein_coding	7	45705088	D site albumin promoter binding protein	597.376	1.87191	1.31174	0.664701	0.506242	1
ENSMUSG00000100335	2310008N11Rik	lincRNA	8	26814593	RIKEN cDNA 2310008N11 gene	1.41698	1.87081	1.2706	0.685355	0.49312	1
ENSMUSG00000108978	Gm44689	lincRNA	7	71681775	predicted gene 44689	1.14818	1.87006	1.43498	0.60632	0.544302	1
ENSMUSG00000031893	Tsnaxip1	protein_coding	8	105827731	translin-associated factor X (Tsnax) interacting protein 1	5.48296	1.86642	1.02482	0.845434	0.397868	1
ENSMUSG00000055424	Gm9970	protein_coding	5	31240675	predicted gene 9970	1.7418	1.86534	1.34378	0.64396	0.519601	1
ENSMUSG00000000093	Tbx2	protein_coding	11	85832551	T-box 2	39.5364	1.86516	0.4813	1.79754	0.0722496	1
ENSMUSG00000039883	Lrrc17	protein_coding	5	21543559	leucine rich repeat containing 17	4.35909	1.86496	0.781954	1.10615	0.26866	1
ENSMUSG00000026413	Pkp1	protein_coding	1	135871395	plakophilin 1	51.8022	1.86418	0.710753	1.21586	0.224037	1
ENSMUSG00000028553	Angptl3	protein_coding	4	99030954	angiopoietin-like 3	5.06023	1.86314	1.04594	0.825228	0.409242	1
ENSMUSG00000031881	Cdh16	protein_coding	8	104601911	cadherin 16	518.389	1.862	0.74004	1.1648	0.244098	1
ENSMUSG00000099730	Gm28547	lincRNA	Y	38102223	predicted gene 28547	0.491687	1.86163	3.38097	0.254847	0.798841	1
ENSMUSG00000061937	Csn1s2a	protein_coding	5	87774567	casein alpha s2-like A	1.82336	1.85942	1.19115	0.7215	0.470602	1
ENSMUSG00000025150	Cbr2	protein_coding	11	120729489	carbonyl reductase 2	14694.5	1.85857	0.696767	1.23222	0.217869	1
ENSMUSG00000030116	Mfap5	protein_coding	6	122505845	microfibrillar associated protein 5	25.8086	1.8574	0.690586	1.24155	0.214404	1
ENSMUSG00000086405	9330198N18Rik	lincRNA	2	30629655	RIKEN cDNA 9330198N18 gene	1.19327	1.85735	1.52676	0.561551	0.574422	1
ENSMUSG00000108085	A930014E10Rik	lincRNA	6	142971752	RIKEN cDNA A930014E10 gene	0.967471	1.85727	1.42503	0.601581	0.547453	1
ENSMUSG00000034739	Mfrp	protein_coding	9	44101729	membrane frizzled-related protein	15.5432	1.85289	0.840276	1.01501	0.310099	1
ENSMUSG00000022018	Rgcc	protein_coding	14	79288756	regulator of cell cycle	5827.06	1.85117	0.672406	1.26585	0.205565	1
ENSMUSG00000108695	Gm2511	lincRNA	7	43511165	predicted gene 2511	0.479584	1.85074	2.25625	0.377059	0.70613	1
ENSMUSG00000057003	Myh4	protein_coding	11	67238029	myosin, heavy polypeptide 4, skeletal muscle	2.78647	1.85024	1.12735	0.754198	0.45073	1
ENSMUSG00000060441	Trim5	protein_coding	7	104263386	tripartite motif-containing 5	36.7817	1.84717	0.708641	1.19549	0.231895	1
ENSMUSG00000014542	Clec4f	protein_coding	6	83644542	C-type lectin domain family 4, member f	3.32953	1.84615	0.789906	1.07121	0.284075	1
ENSMUSG00000019539	Rcn3	protein_coding	7	45082913	reticulocalbin 3, EF-hand calcium binding domain	16.4929	1.84455	0.672288	1.25624	0.209031	1
ENSMUSG00000070601	Vmn2r84	protein_coding	10	130385316	vomeronasal 2, receptor 84	0.498146	1.84271	2.80807	0.300102	0.764099	1
ENSMUSG00000090317	Gm17324	protein_coding	9	78447865	predicted gene, 17324	0.705101	1.8419	2.00698	0.419486	0.674861	1
ENSMUSG00000062224	4933411G06Rik	lincRNA	10	51756173	RIKEN cDNA 4933411G06 gene	0.418407	1.83913	2.64753	0.316948	0.751283	1
ENSMUSG00000084898	Gm12371	lincRNA	4	36952966	predicted gene 12371	1.51361	1.83753	1.28232	0.653138	0.513667	1
ENSMUSG00000030858	1700007K09Rik	protein_coding	7	131325944	RIKEN cDNA 1700007K09 gene	0.648677	1.83327	1.91879	0.434268	0.664094	1
ENSMUSG00000022240	Ctnnd2	protein_coding	15	30172593	catenin (cadherin associated protein), delta 2	44.5073	1.83001	0.773016	1.07372	0.282946	1
ENSMUSG00000046697	Enpp7	protein_coding	11	118988188	ectonucleotide pyrophosphatase/phosphodiesterase 7	2.31254	1.82789	1.02323	0.8091	0.418458	1
ENSMUSG00000006342	Susd2	protein_coding	10	75636706	sushi domain containing 2	359.938	1.82701	0.636462	1.29939	0.193809	1
ENSMUSG00000090165	Ugt1a10	protein_coding	1	88055388	UDP glycosyltransferase 1 family, polypeptide A10	2.67366	1.82495	1.13491	0.72689	0.467293	1
ENSMUSG00000091013	Vmn1r1	protein_coding	1	182157144	vomeronasal 1 receptor 1	0.887825	1.82253	1.61296	0.50995	0.610086	1
ENSMUSG00000069855	Slc47a2	protein_coding	11	61301631	solute carrier family 47, member 2	3.72316	1.82151	1.14291	0.718792	0.472269	1
ENSMUSG00000055643	Ubqln5	protein_coding	7	104127912	ubiquilin 5	2.17321	1.821	0.986781	0.831997	0.405411	1
ENSMUSG00000100314	1700010J16Rik	lincRNA	10	112726888	RIKEN cDNA 1700010J16 gene	0.920425	1.82031	1.77364	0.462499	0.643723	1
ENSMUSG00000022868	Ahsg	protein_coding	16	22892042	alpha-2-HS-glycoprotein	3.77669	1.81966	1.2101	0.677348	0.498185	1
ENSMUSG00000103459	Gm38096	lincRNA	3	83403402	predicted gene, 38096	1.90459	1.81926	1.33429	0.614008	0.53921	1
ENSMUSG00000004654	Ghrhr	protein_coding	6	55376295	growth hormone releasing hormone receptor	3.14144	1.81853	0.933034	0.877282	0.380333	1
ENSMUSG00000114005	AC159238.2	lincRNA	12	70650182		1.62055	1.81667	1.16329	0.702036	0.482657	1
ENSMUSG00000037849	Ifi206	protein_coding	1	173468485	interferon activated gene 206	3.36202	1.81498	1.06152	0.767745	0.442638	1
ENSMUSG00000056617	4931429L15Rik	protein_coding	9	46303361	RIKEN cDNA 4931429L15 gene	6.00456	1.81234	1.62303	0.500508	0.616717	1
ENSMUSG00000027895	Kcnc4	protein_coding	3	107438303	potassium voltage gated channel, Shaw-related subfamily, member 4	30.0103	1.81211	0.672939	1.20681	0.227507	1
ENSMUSG00000101170	Gm29343	lincRNA	Y	61789649	predicted gene 29343	0.414515	1.81	4.17401	0.194058	0.846131	1
ENSMUSG00000043556	Fbxl7	protein_coding	15	26543084	F-box and leucine-rich repeat protein 7	2.56786	1.80871	1.28877	0.627509	0.530326	1
ENSMUSG00000114632	CT025603.4	lincRNA	13	78374179		1.38173	1.80736	1.15867	0.696799	0.485929	1
ENSMUSG00000026620	Mark1	protein_coding	1	184896789	MAP/microtubule affinity regulating kinase 1	7.84498	1.80516	0.715297	1.12564	0.26032	1
ENSMUSG00000042499	Hoxd11	protein_coding	2	74679557	homeobox D11	15.0456	1.80388	0.547246	1.46896	0.141845	1
ENSMUSG00000035296	Sgcg	protein_coding	14	61221059	sarcoglycan, gamma (dystrophin-associated glycoprotein)	0.592353	1.80378	2.62328	0.306403	0.759298	1
ENSMUSG00000034059	Ypel4	protein_coding	2	84734058	yippee-like 4 (Drosophila)	43.7002	1.79965	0.758156	1.05473	0.291549	1
ENSMUSG00000074155	Klk5	protein_coding	7	43841971	kallikrein related-peptidase 5	0.916345	1.79922	2.34171	0.341298	0.73288	1
ENSMUSG00000070383	Olfr389	protein_coding	11	73774849	olfactory receptor 389	0.791574	1.7951	1.99241	0.399064	0.689846	1
ENSMUSG00000104607	Gm31651	lincRNA	3	116200408	predicted gene, 31651	1.99154	1.79353	1.05956	0.748923	0.453904	1
ENSMUSG00000037996	Slc24a2	protein_coding	4	86983124	solute carrier family 24 (sodium/potassium/calcium exchanger), member 2	10.5757	1.7894	0.897951	0.879107	0.379343	1
ENSMUSG00000047216	Cdh19	protein_coding	1	110888326	cadherin 19, type 2	2.33202	1.77414	1.41311	0.547827	0.583811	1
ENSMUSG00000099876	Gm29650	lincRNA	Y	1048393	predicted gene 29650	23.356	1.76752	0.874114	0.878058	0.379912	1
ENSMUSG00000057203	Vmn1r234	protein_coding	17	21228826	vomeronasal 1 receptor 234	0.416537	1.76744	3.43355	0.223511	0.823138	1
ENSMUSG00000048747	E130114P18Rik	protein_coding	4	97568133	RIKEN cDNA E130114P18 gene	7.18113	1.76442	0.9835	0.777241	0.437017	1
ENSMUSG00000020191	4930415F15Rik	protein_coding	11	11462094	RIKEN cDNA 4930415F15 gene	3.15901	1.76242	1.30857	0.58264	0.560136	1
ENSMUSG00000046337	Fam178b	protein_coding	1	36562692	family with sequence similarity 178, member B	44.2678	1.76224	0.926408	0.822792	0.410626	1
ENSMUSG00000022780	Meltf	protein_coding	16	31878810	melanotransferrin	13.271	1.76139	0.762865	0.998063	0.318249	1
ENSMUSG00000025172	Ankrd2	protein_coding	19	42036038	ankyrin repeat domain 2 (stretch responsive muscle)	2.24136	1.76117	0.90941	0.836992	0.402597	1
ENSMUSG00000084861	1700095J07Rik	lincRNA	6	30304605	RIKEN cDNA 1700095J07 gene	2.32448	1.7604	0.96083	0.791394	0.428714	1
ENSMUSG00000050855	Zfp940	protein_coding	7	29833620	zinc finger protein 940	102.781	1.75845	0.531461	1.4271	0.15355	1
ENSMUSG00000070858	Gm1673	protein_coding	5	33983433	predicted gene 1673	0.642691	1.75559	1.72535	0.437934	0.661434	1
ENSMUSG00000093985	Gm10406	protein_coding	14	7006115	predicted gene 10406	5.84362	1.75099	1.54099	0.487342	0.626016	1
ENSMUSG00000097671	1700015O11Rik	lincRNA	6	113631649	RIKEN cDNA 1700015O11 gene	4.17918	1.74997	0.867041	0.864975	0.387052	1
ENSMUSG00000087277	2010013B24Rik	lincRNA	6	145303152	RIKEN cDNA 2010013B24 gene	4.0816	1.7495	0.925777	0.809585	0.418178	1
ENSMUSG00000038390	Gpr162	protein_coding	6	124858444	G protein-coupled receptor 162	12.6217	1.74676	0.773492	0.965438	0.334326	1
ENSMUSG00000004821	Tmed11	protein_coding	5	108777235	transmembrane p24 trafficking protein 11	9.12381	1.74473	0.722678	1.03051	0.302771	1
ENSMUSG00000094439	Gm21969	protein_coding	4	139603186	predicted gene 21969	2.02881	1.74187	1.75014	0.423892	0.671645	1
ENSMUSG00000024680	Ms4a2	protein_coding	19	11615523	membrane-spanning 4-domains, subfamily A, member 2	3.6713	1.74134	1.09625	0.676249	0.498883	1
ENSMUSG00000103811	Gm38004	lincRNA	9	108991214	predicted gene, 38004	1.01317	1.73879	1.86811	0.395477	0.692491	1
ENSMUSG00000009281	Rarres2	protein_coding	6	48569696	retinoic acid receptor responder (tazarotene induced) 2	14.7147	1.73357	0.574054	1.27787	0.201294	1
ENSMUSG00000040629	Mael	protein_coding	1	166201201	maelstrom spermatogenic transposon silencer	0.746999	1.73274	1.56442	0.468376	0.639516	1
ENSMUSG00000075196	Olfr1047	protein_coding	2	86226567	olfactory receptor 1047	1.5695	1.73194	1.24437	0.588202	0.556397	1
ENSMUSG00000114279	Hist1h2bm	protein_coding	13	21722044	histone cluster 1, H2bm	0.961773	1.7314	2.21772	0.329798	0.741552	1
ENSMUSG00000050397	Foxl2	protein_coding	9	98955288	forkhead box L2	0.477257	1.72941	2.31802	0.314668	0.753014	1
ENSMUSG00000052516	Robo2	protein_coding	16	73892306	roundabout guidance receptor 2	20.6768	1.72841	0.645655	1.12817	0.25925	1
ENSMUSG00000053219	Raet1e	protein_coding	10	22158569	retinoic acid early transcript 1E	253.483	1.72631	0.99309	0.731359	0.46456	1
ENSMUSG00000108103	Gm44081	lincRNA	6	112947037	predicted gene, 44081	0.779255	1.72443	1.43121	0.506167	0.61274	1
ENSMUSG00000027233	Patl2	protein_coding	2	122120108	protein associated with topoisomerase II homolog 2 (yeast)	1.48015	1.7242	1.24132	0.583415	0.559614	1
ENSMUSG00000029630	Cyp3a25	protein_coding	5	145977194	cytochrome P450, family 3, subfamily a, polypeptide 25	3.7925	1.72416	1.14068	0.634847	0.525528	1
ENSMUSG00000026109	Tmeff2	protein_coding	1	50900647	transmembrane protein with EGF-like and two follistatin-like domains 2	5.59865	1.71634	0.787748	0.909356	0.363162	1
ENSMUSG00000114615	AC158531.2	lincRNA	14	9400624		0.849371	1.71136	1.63062	0.436251	0.662655	1
ENSMUSG00000103690	A730004F24Rik	lincRNA	1	186511838	RIKEN cDNA A730004F24 gene	1.21693	1.70985	1.41633	0.501188	0.616239	1
ENSMUSG00000078772	Gm12353	protein_coding	4	19605451	predicted gene 12353	1.78297	1.70964	1.45069	0.489174	0.624719	1
ENSMUSG00000060335	Olfr384	protein_coding	11	73598594	olfactory receptor 384	4.91408	1.70949	0.779228	0.91051	0.362554	1
ENSMUSG00000032191	Bcl2l10	protein_coding	9	75347758	Bcl2-like 10	2.02593	1.7091	0.971806	0.729674	0.465589	1
ENSMUSG00000029661	Col1a2	protein_coding	6	4504814	collagen, type I, alpha 2	148.406	1.70849	0.397924	1.78047	0.0749992	1
ENSMUSG00000030340	Scnn1a	protein_coding	6	125320659	sodium channel, nonvoltage-gated 1 alpha	10057.5	1.70666	0.396463	1.7824	0.0746838	1
ENSMUSG00000095407	Tmem200c	protein_coding	17	68837136	transmembrane protein 200C	2.8889	1.70517	0.955786	0.737793	0.46064	1
ENSMUSG00000039787	Cercam	protein_coding	2	29869164	cerebral endothelial cell adhesion molecule	26.5756	1.70375	0.52775	1.33349	0.182373	1
ENSMUSG00000016524	Il19	protein_coding	1	130932656	interleukin 19	0.487063	1.70351	2.10621	0.334019	0.738365	1
ENSMUSG00000038246	Fam50b	protein_coding	13	34734850	family with sequence similarity 50, member B	0.960272	1.70093	1.79877	0.38967	0.69678	1
ENSMUSG00000106718	Gm20052	lincRNA	5	37893772	predicted gene, 20052	13.2754	1.69905	1.92079	0.363941	0.715902	1
ENSMUSG00000059325	Hopx	protein_coding	5	77086988	HOP homeobox	4159.48	1.6987	0.397875	1.75609	0.079073	1
ENSMUSG00000033191	Tie1	protein_coding	4	118471191	tyrosine kinase with immunoglobulin-like and EGF-like domains 1	61.3758	1.69869	0.364073	1.91908	0.0549737	1
ENSMUSG00000020799	Tekt1	protein_coding	11	72344722	tektin 1	7.58765	1.69857	0.600981	1.16238	0.245082	1
ENSMUSG00000095956	1700036A12Rik	lincRNA	9	60743120	RIKEN cDNA 1700036A12 gene	0.911894	1.69821	1.98735	0.351328	0.725342	1
ENSMUSG00000069372	Ctxn3	protein_coding	18	57468516	cortexin 3	0.769998	1.69791	2.07908	0.33568	0.737112	1
ENSMUSG00000085338	2410004I01Rik	lincRNA	11	102958300	RIKEN cDNA 2410004I01 gene	14.0943	1.69555	0.533535	1.30367	0.192347	1
ENSMUSG00000072941	Sod3	protein_coding	5	52363791	superoxide dismutase 3, extracellular	46.3644	1.69482	0.571626	1.21551	0.224173	1
ENSMUSG00000036040	Adamtsl2	protein_coding	2	27079379	ADAMTS-like 2	22.6335	1.69232	0.702307	0.98578	0.324241	1
ENSMUSG00000074874	Ctla2b	protein_coding	13	60895350	cytotoxic T lymphocyte-associated protein 2 beta	4.41052	1.69229	0.818397	0.845907	0.397605	1
ENSMUSG00000040541	Tmem225	protein_coding	9	40148122	transmembrane protein 225	0.85564	1.6916	1.43665	0.481402	0.630231	1
ENSMUSG00000092519	Actl9	protein_coding	17	33432896	actin-like 9	1.08337	1.68894	1.4744	0.467267	0.640309	1
ENSMUSG00000113334	AC113508.1	lincRNA	13	70650144		1.51307	1.68692	1.3574	0.506055	0.612818	1
ENSMUSG00000098640	Gm14214	protein_coding	2	154769255	predicted gene 14214	1.97006	1.68508	1.42501	0.480753	0.630692	1
ENSMUSG00000106783	Gm42105	lincRNA	5	77138471	predicted gene, 42105	14.2744	1.6843	0.714905	0.957191	0.338471	1
ENSMUSG00000028222	Calb1	protein_coding	4	15881264	calbindin 1	4.59461	1.68117	1.10198	0.618132	0.536488	1
ENSMUSG00000106594	4930432H08Rik	lincRNA	5	106364561	RIKEN cDNA 4930432H08 gene	1.28672	1.68094	1.48588	0.458276	0.646754	1
ENSMUSG00000099528	2410012E07Rik	lincRNA	14	70852933	RIKEN cDNA 2410012E07 gene	0.887937	1.67856	1.39341	0.486979	0.626273	1
ENSMUSG00000112216	AC153856.3	protein_coding	10	118238372		0.449972	1.67624	3.29261	0.20538	0.837275	1
ENSMUSG00000112252	AC153856.4	protein_coding	10	118258688		0.449972	1.67624	3.29261	0.20538	0.837275	1
ENSMUSG00000086872	Gm14225	lincRNA	2	156445033	predicted gene 14225	4.0374	1.67508	0.833824	0.809617	0.418161	1
ENSMUSG00000106980	Gm43690	lincRNA	5	150570833	predicted gene 43690	0.826898	1.67455	1.74609	0.386322	0.699258	1
ENSMUSG00000023013	Aqp2	protein_coding	15	99579056	aquaporin 2	6.74095	1.67439	0.599759	1.12444	0.260825	1
ENSMUSG00000026043	Col3a1	protein_coding	1	45311538	collagen, type III, alpha 1	203.23	1.67413	0.393648	1.71253	0.086799	1
ENSMUSG00000067610	Klri1	protein_coding	6	129697218	killer cell lectin-like receptor family I member 1	0.680946	1.67343	1.84269	0.36546	0.714768	1
ENSMUSG00000091230	Gm6970	protein_coding	19	47170469	predicted gene 6970	1.02179	1.67142	1.55724	0.431158	0.666354	1
ENSMUSG00000027824	Vmn2r1	protein_coding	3	64081642	vomeronasal 2, receptor 1	2.28652	1.6713	1.09966	0.610465	0.541554	1
ENSMUSG00000022269	March11	protein_coding	15	26309048	membrane-associated ring finger (C3HC4) 11	1.96554	1.67061	1.07527	0.623672	0.532843	1
ENSMUSG00000090843	Heatr4	protein_coding	12	83954499	HEAT repeat containing 4	1.51571	1.66964	1.33739	0.500704	0.616579	1
ENSMUSG00000097013	Gm26710	lincRNA	10	80578647	predicted gene, 26710	2.73037	1.66866	0.849275	0.787335	0.431086	1
ENSMUSG00000109891	Gm45339	lincRNA	7	135274658	predicted gene 45339	1.39351	1.6661	1.42091	0.468782	0.639225	1
ENSMUSG00000085648	Gm13173	lincRNA	4	153145590	predicted gene 13173	0.436816	1.66597	2.71883	0.244948	0.806497	1
ENSMUSG00000037411	Serpine1	protein_coding	5	137061504	serine (or cysteine) peptidase inhibitor, clade E, member 1	863.718	1.66376	0.791607	0.8385	0.40175	1
ENSMUSG00000047025	Ccer1	protein_coding	10	97693059	coiled-coil glutamate-rich protein 1	0.821369	1.66359	1.69893	0.390597	0.696095	1
ENSMUSG00000006007	Pdc	protein_coding	1	150319417	phosducin	2.77379	1.66298	1.04853	0.632288	0.527199	1
ENSMUSG00000111843	CT025575.1	lincRNA	9	118429836		0.898475	1.66084	1.63372	0.404501	0.685844	1
ENSMUSG00000110838	CT030709.1	lincRNA	9	77706558		0.423653	1.65951	2.30647	0.285939	0.774925	1
ENSMUSG00000089768	Tmsb15b1	protein_coding	X	136974022	thymosin beta 15b1	10.0873	1.65711	0.564623	1.16381	0.244502	1
ENSMUSG00000028838	Extl1	protein_coding	4	134356372	exostoses (multiple)-like 1	24.0951	1.6556	0.488324	1.34255	0.179419	1
ENSMUSG00000045083	Lingo2	protein_coding	4	35706647	leucine rich repeat and Ig domain containing 2	3.70169	1.65495	1.27435	0.513945	0.607291	1
ENSMUSG00000110013	1190028D05Rik	lincRNA	8	52356611	RIKEN cDNA 1190028D05 gene	0.587117	1.65341	1.80448	0.362104	0.717274	1
ENSMUSG00000031722	Hp	protein_coding	8	109575128	haptoglobin	15263.1	1.65329	0.463906	1.40823	0.159063	1
ENSMUSG00000079013	Serpina3j	protein_coding	12	104314553	serine (or cysteine) peptidase inhibitor, clade A (alpha-1 antiproteinase, antitrypsin), member 3J	1.7833	1.65308	1.42347	0.458798	0.646379	1
ENSMUSG00000023078	Cxcl13	protein_coding	5	95956951	chemokine (C-X-C motif) ligand 13	1.2087	1.65049	1.7589	0.369828	0.711511	1
ENSMUSG00000093557	4930555M17Rik	lincRNA	3	5512995	RIKEN cDNA 4930555M17 gene	0.812616	1.65008	1.72859	0.376074	0.706862	1
ENSMUSG00000045364	Ifne	protein_coding	4	88879538	interferon epsilon	0.53594	1.64834	2.05315	0.315776	0.752172	1
ENSMUSG00000085682	Gm14267	lincRNA	2	166502101	predicted gene 14267	1.44636	1.64765	1.14703	0.564632	0.572324	1
ENSMUSG00000034220	Gpc1	protein_coding	1	92831645	glypican 1	673.35	1.64762	0.496193	1.30518	0.191832	1
ENSMUSG00000034040	Wbscr17	protein_coding	5	130872082	Williams-Beuren syndrome chromosome region 17 homolog (human)	10.5395	1.64667	0.480985	1.34446	0.178799	1
ENSMUSG00000036924	Cst13	protein_coding	2	148820081	cystatin 13	0.735317	1.64517	1.79851	0.358724	0.719801	1
ENSMUSG00000040364	Sec1	protein_coding	7	45677686	secretory blood group 1	57.5306	1.6451	0.656404	0.982776	0.325718	1
ENSMUSG00000043614	Vps37d	protein_coding	5	135072900	vacuolar protein sorting 37D	24.1163	1.64485	0.471416	1.36791	0.171341	1
ENSMUSG00000110891	AC159378.1	lincRNA	10	45024302		0.474079	1.64443	2.01519	0.319786	0.74913	1
ENSMUSG00000114379	CT030135.1	lincRNA	13	83971355		1.3898	1.64265	1.21822	0.527535	0.597822	1
ENSMUSG00000111961	AC122210.1	lincRNA	10	126714005		0.712876	1.64159	1.48149	0.43307	0.664964	1
ENSMUSG00000043342	Hoxd9	protein_coding	2	74697727	homeobox D9	0.730202	1.64154	1.7334	0.370102	0.711307	1
ENSMUSG00000005089	Slc1a2	protein_coding	2	102658659	solute carrier family 1 (glial high affinity glutamate transporter), member 2	35.5951	1.64151	0.964119	0.665388	0.505802	1
ENSMUSG00000055078	Gabra5	protein_coding	7	57407672	gamma-aminobutyric acid (GABA) A receptor, subunit alpha 5	5.50141	1.64019	1.05856	0.60477	0.545332	1
ENSMUSG00000111836	AC140363.2	lincRNA	9	51914427		2.98771	1.64003	1.18578	0.539754	0.589367	1
ENSMUSG00000037386	Rims2	protein_coding	15	39198332	regulating synaptic membrane exocytosis 2	51.0744	1.63983	0.557956	1.14674	0.251487	1
ENSMUSG00000041735	Gm13178	protein_coding	4	144703191	predicted gene 13178	0.826926	1.63974	1.69692	0.376999	0.706174	1
ENSMUSG00000028836	Slc30a2	protein_coding	4	134343181	solute carrier family 30 (zinc transporter), member 2	46.0244	1.63921	0.448341	1.42573	0.153946	1
ENSMUSG00000039323	Igfbp2	protein_coding	1	72824503	insulin-like growth factor binding protein 2	16.4597	1.63733	0.586019	1.08756	0.276789	1
ENSMUSG00000109629	Gm34099	lincRNA	8	57403104	predicted gene, 34099	1.20018	1.63685	1.45115	0.43886	0.660763	1
ENSMUSG00000086519	Gm13393	lincRNA	2	29088666	predicted gene 13393	0.69076	1.63683	2.78955	0.228293	0.819419	1
ENSMUSG00000112728	AC123694.2	lincRNA	10	117390022		0.389541	1.63641	4.18138	0.1522	0.879029	1
ENSMUSG00000044378	Slc15a5	protein_coding	6	137983586	solute carrier family 15, member 5	2.13534	1.63631	0.946901	0.67199	0.50159	1
ENSMUSG00000029678	Hyal5	protein_coding	6	24857997	hyaluronoglucosaminidase 5	0.466764	1.6361	2.36701	0.268735	0.788134	1
ENSMUSG00000087527	Gm13656	lincRNA	2	75729592	predicted gene 13656	1.8487	1.63544	1.56369	0.406375	0.684467	1
ENSMUSG00000079299	Klrb1	protein_coding	6	128705836	killer cell lectin-like receptor subfamily B member 1	0.48272	1.63529	2.01854	0.314726	0.75297	1
ENSMUSG00000059891	Tsks	protein_coding	7	44943204	testis-specific serine kinase substrate	4.46841	1.63504	0.828601	0.766396	0.443441	1
ENSMUSG00000029206	Nsun7	protein_coding	5	66259897	NOL1/NOP2/Sun domain family, member 7	63.3731	1.63329	0.515757	1.22788	0.219493	1
ENSMUSG00000064294	Aox3	protein_coding	1	58113130	aldehyde oxidase 3	10157.8	1.63171	0.423764	1.49072	0.136035	1
ENSMUSG00000068314	Gm6899	protein_coding	11	26593241	predicted gene 6899	0.519162	1.63053	2.34536	0.268842	0.788052	1
ENSMUSG00000067615	Krt81	protein_coding	15	101459061	keratin 81	0.414542	1.63032	2.73778	0.230231	0.817912	1
ENSMUSG00000108236	0610033M10Rik	lincRNA	6	51400966	RIKEN cDNA 0610033M10 gene	0.705337	1.62891	1.73976	0.361493	0.717731	1
ENSMUSG00000104898	Gm30043	lincRNA	3	82754524	predicted gene, 30043	0.544205	1.62859	1.82467	0.344496	0.730473	1
ENSMUSG00000042596	Tfap2d	protein_coding	1	19103022	transcription factor AP-2, delta	0.543687	1.62858	2.74121	0.229309	0.818629	1
ENSMUSG00000103408	Gm37933	lincRNA	3	86142757	predicted gene, 37933	0.470795	1.6283	2.02131	0.310838	0.755924	1
ENSMUSG00000107730	Gm44238	lincRNA	6	134928992	predicted gene, 44238	0.412046	1.62822	2.31516	0.27135	0.786122	1
ENSMUSG00000049353	Rd3	protein_coding	1	191977370	retinal degeneration 3	6.16933	1.62682	1.0948	0.572542	0.566955	1
ENSMUSG00000018451	6330403K07Rik	lincRNA	11	71031941	RIKEN cDNA 6330403K07 gene	2.35612	1.62622	1.05145	0.595576	0.551459	1
ENSMUSG00000112636	AC152414.2	lincRNA	10	103507362		0.529605	1.62189	2.74018	0.226951	0.820461	1
ENSMUSG00000021508	Cxcl14	protein_coding	13	56288643	chemokine (C-X-C motif) ligand 14	32.1763	1.61892	0.505729	1.22381	0.221023	1
ENSMUSG00000037509	Arhgef4	protein_coding	1	34678188	Rho guanine nucleotide exchange factor (GEF) 4	263.281	1.61812	0.859253	0.719365	0.471916	1
ENSMUSG00000058005	Tdpoz3	protein_coding	3	93826020	TD and POZ domain containing 3	0.781651	1.61402	1.94747	0.315289	0.752543	1
ENSMUSG00000097208	Gm26698	lincRNA	12	86891404	predicted gene, 26698	9.79333	1.61401	0.704754	0.871235	0.383626	1
ENSMUSG00000074123	7420426K07Rik	protein_coding	9	98903119	RIKEN cDNA 7420426K07 gene	0.501485	1.61339	2.0122	0.304835	0.760492	1
ENSMUSG00000044933	Sstr3	protein_coding	15	78537015	somatostatin receptor 3	32.7241	1.61272	0.561271	1.09166	0.274983	1
ENSMUSG00000042788	Fam166b	protein_coding	4	43427019	family with sequence similarity 166, member B	8.26265	1.60951	1.12153	0.54346	0.586813	1
ENSMUSG00000003477	Inmt	protein_coding	6	55170626	indolethylamine N-methyltransferase	104.678	1.60911	0.597331	1.01971	0.307864	1
ENSMUSG00000071591	Gm10339	lincRNA	14	7374667	predicted gene 10339	0.808679	1.60719	2.5073	0.242167	0.808651	1
ENSMUSG00000069717	Gm11568	protein_coding	11	99857917	predicted gene 11568	0.489172	1.60679	3.36325	0.180419	0.856824	1
ENSMUSG00000045114	Prrt2	protein_coding	7	127017531	proline-rich transmembrane protein 2	34.42	1.60678	1.52179	0.39873	0.690092	1
ENSMUSG00000113324	AC122371.3	lincRNA	13	69697811		0.360624	1.60529	2.30727	0.262342	0.793058	1
ENSMUSG00000107110	Gm42931	lincRNA	6	35611089	predicted gene 42931	0.86317	1.60428	1.7558	0.344165	0.730722	1
ENSMUSG00000111368	AC163661.1	lincRNA	10	43518571		2.5053	1.6036	1.07837	0.559731	0.575663	1
ENSMUSG00000082766	1700064H15Rik	protein_coding	3	19610368	RIKEN cDNA 1700064H15 gene	1.72589	1.60346	1.15677	0.521675	0.601897	1
ENSMUSG00000021700	Rab3c	protein_coding	13	110054187	RAB3C, member RAS oncogene family	202.284	1.60183	0.46437	1.29601	0.194971	1
ENSMUSG00000022619	Mapk8ip2	protein_coding	15	89453913	mitogen-activated protein kinase 8 interacting protein 2	7.3346	1.60165	1.11814	0.538079	0.590523	1
ENSMUSG00000054885	4930578G10Rik	protein_coding	4	42735545	RIKEN cDNA 4930578G10 gene	1.2554	1.60143	1.39463	0.431245	0.66629	1
ENSMUSG00000042604	Kcna4	protein_coding	2	107290639	potassium voltage-gated channel, shaker-related subfamily, member 4	5.46281	1.59977	1.18593	0.505739	0.61304	1
ENSMUSG00000030114	Klrg1	protein_coding	6	122270596	killer cell lectin-like receptor subfamily G, member 1	1.62512	1.59845	1.5685	0.38154	0.702802	1
ENSMUSG00000086286	Gm15138	lincRNA	X	151169700	predicted gene 15138	0.532082	1.59665	2.0221	0.295064	0.767945	1
ENSMUSG00000104021	Gm36536	lincRNA	1	176430111	predicted gene, 36536	0.618263	1.5944	2.07324	0.2867	0.774342	1
ENSMUSG00000042525	4933428M09Rik	protein_coding	X	139179228	RIKEN cDNA 4933428M09 gene	1.29023	1.59434	1.62875	0.364905	0.715183	1
ENSMUSG00000038292	Ccdc155	protein_coding	7	45183624	coiled-coil domain containing 155	29.0456	1.59239	0.494261	1.19853	0.230711	1
ENSMUSG00000104201	4930535G08Rik	lincRNA	1	36011072	RIKEN cDNA 4930535G08 gene	0.482767	1.59104	2.34963	0.251545	0.801393	1
ENSMUSG00000087450	Gm13994	lincRNA	2	124708655	predicted gene 13994	0.411761	1.5905	2.73835	0.215642	0.829267	1
ENSMUSG00000058071	Olfr818	protein_coding	10	129944396	olfactory receptor 818	1.66975	1.59014	1.38187	0.427061	0.669335	1
ENSMUSG00000056257	Gm5447	protein_coding	13	30974204	predicted gene 5447	1.57465	1.58981	1.25568	0.469716	0.638558	1
ENSMUSG00000068940	Tcl1b3	protein_coding	12	105191043	T cell leukemia/lymphoma 1B, 3	0.541161	1.58827	1.98564	0.29626	0.767031	1
ENSMUSG00000086899	1600002D24Rik	lincRNA	16	95831123	RIKEN cDNA 1600002D24 gene	5.49604	1.58555	0.977833	0.59882	0.549293	1
ENSMUSG00000061296	Vmn1r210	protein_coding	13	22827194	vomeronasal 1 receptor 210	0.674316	1.5855	1.73108	0.338228	0.735191	1
ENSMUSG00000059867	Olfr960	protein_coding	9	39621373	olfactory receptor 960	0.542975	1.58524	1.70181	0.343893	0.730927	1
ENSMUSG00000092586	Ly6g6c	protein_coding	17	35065388	lymphocyte antigen 6 complex, locus G6C	238.372	1.58512	0.37565	1.55763	0.119321	1
ENSMUSG00000039196	Orm1	protein_coding	4	63344560	orosomucoid 1	317.84	1.58463	0.535604	1.09154	0.275034	1
ENSMUSG00000038135	Crygn	protein_coding	5	24751003	crystallin, gamma N	9.49152	1.58363	0.498506	1.17075	0.241699	1
ENSMUSG00000078554	Fam229a	protein_coding	4	129491190	family with sequence similarity 229, member A	4.87539	1.58306	0.708253	0.823237	0.410373	1
ENSMUSG00000111281	AC156801.1	lincRNA	9	85221196		0.434202	1.57978	2.75998	0.210067	0.833615	1
ENSMUSG00000112635	CT025625.1	lincRNA	12	97098706		0.577697	1.57881	2.06902	0.279752	0.779668	1
ENSMUSG00000003341	Atp8b3	protein_coding	10	80519584	ATPase, class I, type 8B, member 3	3.51986	1.57621	1.16052	0.496506	0.619537	1
ENSMUSG00000001506	Col1a1	protein_coding	11	94936224	collagen, type I, alpha 1	178.223	1.57498	0.551471	1.04264	0.297116	1
ENSMUSG00000043787	Defb12	protein_coding	8	19111931	defensin beta 12	1.1216	1.57465	1.47422	0.389799	0.696686	1
ENSMUSG00000043569	Cldn34c4	protein_coding	X	127721182	claudin 34C4	0.635427	1.57427	1.67932	0.341966	0.732377	1
ENSMUSG00000016179	Camk1g	protein_coding	1	193346346	calcium/calmodulin-dependent protein kinase I gamma	8.37259	1.57339	0.535208	1.07134	0.284015	1
ENSMUSG00000107946	Gm44066	lincRNA	6	128842558	predicted gene, 44066	29.8734	1.57102	0.314298	1.81681	0.0692455	1
ENSMUSG00000097044	4933433F19Rik	lincRNA	8	30568393	RIKEN cDNA 4933433F19 gene	0.825593	1.56969	1.60197	0.355618	0.722127	1
ENSMUSG00000026692	Fmo4	protein_coding	1	162793188	flavin containing monooxygenase 4	653.676	1.56921	0.422414	1.34752	0.177814	1
ENSMUSG00000053395	Cacng8	protein_coding	7	3390683	calcium channel, voltage-dependent, gamma subunit 8	3.10413	1.56803	1.07197	0.529891	0.596188	1
ENSMUSG00000027606	Dnajc5b	protein_coding	3	19508595	DnaJ heat shock protein family (Hsp40) member C5 beta	6.45549	1.56779	0.65212	0.870675	0.383931	1
ENSMUSG00000110063	Gm31045	lincRNA	8	25463677	predicted gene, 31045	1.17072	1.5675	1.64664	0.344642	0.730364	1
ENSMUSG00000113909	AC113508.4	lincRNA	13	70651005		11.8095	1.56718	0.605312	0.936997	0.34876	1
ENSMUSG00000041193	Pla2g5	protein_coding	4	138799244	phospholipase A2, group V	18.9424	1.56697	0.677575	0.836761	0.402727	1
ENSMUSG00000051851	Cxx1c	protein_coding	X	53608032	CAAX box 1C	4.857	1.56645	0.806094	0.702712	0.482235	1
ENSMUSG00000046470	Sox18	protein_coding	2	181669836	SRY (sex determining region Y)-box 18	17.0625	1.56558	0.595303	0.950067	0.342078	1
ENSMUSG00000032057	4833427G06Rik	protein_coding	9	51081115	RIKEN cDNA 4833427G06 gene	1.35657	1.56462	1.3613	0.414761	0.678317	1
ENSMUSG00000046500	Fam19a4	protein_coding	6	96831203	family with sequence similarity 19, member A4	181.163	1.5638	0.802678	0.702404	0.482427	1
ENSMUSG00000047222	Rnase2a	protein_coding	14	51255266	ribonuclease, RNase A family, 2A (liver, eosinophil-derived neurotoxin)	14.7908	1.56327	1.41366	0.398445	0.690302	1
ENSMUSG00000071262	Zfp957	protein_coding	14	79212353	zinc finger protein 957	3.80165	1.56208	0.852877	0.659038	0.509871	1
ENSMUSG00000096719	Mrgpra2b	protein_coding	7	47463806	MAS-related GPR, member A2B	0.828821	1.56128	2.47862	0.22645	0.820851	1
ENSMUSG00000097805	Gm17473	lincRNA	15	42676260	predicted gene, 17473	0.489288	1.56079	2.02958	0.276309	0.78231	1
ENSMUSG00000049687	Fam109b	protein_coding	15	82338942	family with sequence similarity 109, member B	11.9609	1.5603	0.610048	0.918449	0.358384	1
ENSMUSG00000087376	Gm15517	protein_coding	7	44261447	predicted gene 15517	2.62722	1.5597	1.0752	0.520553	0.602678	1
ENSMUSG00000086848	Lce6a	protein_coding	3	92620081	late cornified envelope 6A	0.336427	1.55886	2.8	0.199594	0.841798	1
ENSMUSG00000101389	Ms4a4a	protein_coding	19	11375523	membrane-spanning 4-domains, subfamily A, member 4A	3.49787	1.5582	1.14229	0.488665	0.625079	1
ENSMUSG00000029452	Tmem116	protein_coding	5	121451893	transmembrane protein 116	614.671	1.55726	0.287901	1.93559	0.0529181	1
ENSMUSG00000024558	Mapk4	protein_coding	18	73928486	mitogen-activated protein kinase 4	9.08012	1.5571	1.1056	0.503891	0.614338	1
ENSMUSG00000045625	Pigz	protein_coding	16	31933851	phosphatidylinositol glycan anchor biosynthesis, class Z	15.7593	1.55485	1.45346	0.381742	0.702652	1
ENSMUSG00000086666	Gm12249	lincRNA	11	57970244	predicted gene 12249	0.522631	1.55474	1.82484	0.303991	0.761134	1
ENSMUSG00000109926	Gm45808	protein_coding	7	45465984	predicted gene 45808	5.15451	1.55341	1.27234	0.434958	0.663593	1
ENSMUSG00000090894	Olfr110	protein_coding	17	37492468	olfactory receptor 110	3.02752	1.55288	1.14443	0.483108	0.629019	1
ENSMUSG00000042200	Cdrt4	protein_coding	11	62951193	CMT1A duplicated region transcript 4	2.57617	1.5528	1.39485	0.396315	0.691873	1
ENSMUSG00000020000	Moxd1	protein_coding	10	24223517	monooxygenase, DBH-like 1	2.8275	1.5516	0.956503	0.576681	0.564155	1
ENSMUSG00000102682	Gm37223	lincRNA	1	184358329	predicted gene, 37223	0.487212	1.55119	1.82839	0.301459	0.763064	1
ENSMUSG00000025927	Tfap2b	protein_coding	1	19208914	transcription factor AP-2 beta	11.0178	1.55039	0.601443	0.91512	0.360128	1
ENSMUSG00000096044	Gm16427	protein_coding	5	93481829	predicted gene 16427	0.726535	1.54956	1.71231	0.320946	0.748251	1
ENSMUSG00000095870	Lce1k	protein_coding	3	92806291	late cornified envelope 1K	1.41843	1.54935	1.12829	0.486882	0.626342	1
ENSMUSG00000059042	Klk1b9	protein_coding	7	43976061	kallikrein 1-related peptidase b9	1.65348	1.54702	1.16635	0.468999	0.63907	1
ENSMUSG00000015829	Tnr	protein_coding	1	159523769	tenascin R	16.7159	1.54683	0.656756	0.832629	0.405054	1
ENSMUSG00000026807	Ak8	protein_coding	2	28700164	adenylate kinase 8	8.84305	1.54625	0.841876	0.648849	0.516436	1
ENSMUSG00000038496	Slc19a3	protein_coding	1	83012523	solute carrier family 19, member 3	113.165	1.54578	0.496426	1.09941	0.271589	1
ENSMUSG00000027750	Postn	protein_coding	3	54361109	periostin, osteoblast specific factor	38.5066	1.54442	0.619367	0.878987	0.379409	1
ENSMUSG00000022215	Fitm1	protein_coding	14	55575617	fat storage-inducing transmembrane protein 1	4.42321	1.54292	0.662361	0.819669	0.412405	1
ENSMUSG00000114923	CT573016.1	protein_coding	13	67592159		4.40645	1.5428	1.78657	0.303825	0.761261	1
ENSMUSG00000032648	Pygm	protein_coding	19	6384399	muscle glycogen phosphorylase	18.4579	1.54252	0.656882	0.825905	0.408858	1
ENSMUSG00000057093	Zfp607b	protein_coding	7	27689340	zinc finger protein 607B	44.1328	1.54094	0.384315	1.40755	0.159265	1
ENSMUSG00000073964	Olfr570	protein_coding	7	102894577	olfactory receptor 570	0.776376	1.54076	1.72547	0.313396	0.75398	1
ENSMUSG00000109478	Gm39078	lincRNA	7	119600840	predicted gene, 39078	1.53553	1.53989	1.21531	0.444244	0.656866	1
ENSMUSG00000094024	Esp18	protein_coding	17	39406359	exocrine gland secreted peptide 18	0.747632	1.53967	1.89992	0.28405	0.776372	1
ENSMUSG00000056673	Kdm5d	protein_coding	Y	897788	lysine (K)-specific demethylase 5D	620.782	1.53958	1.08375	0.497887	0.618564	1
ENSMUSG00000039878	Slc39a5	protein_coding	10	128395931	solute carrier family 39 (metal ion transporter), member 5	2.66676	1.53935	1.0385	0.519354	0.603514	1
ENSMUSG00000028789	Azin2	protein_coding	4	128930233	antizyme inhibitor 2	775.383	1.5385	0.337636	1.59492	0.110729	1
ENSMUSG00000112924	AC132304.3	lincRNA	10	116729253		1.11991	1.53837	1.67813	0.320816	0.74835	1
ENSMUSG00000112749	AC153938.3	lincRNA	10	96336090		0.416242	1.53778	2.2904	0.234799	0.814365	1
ENSMUSG00000054728	Phactr1	protein_coding	13	42680623	phosphatase and actin regulator 1	247.531	1.5362	0.627291	0.854791	0.392667	1
ENSMUSG00000000690	Hoxb6	protein_coding	11	96292476	homeobox B6	1.49564	1.53556	1.16785	0.458582	0.646534	1
ENSMUSG00000003153	Slc2a3	protein_coding	6	122727809	solute carrier family 2 (facilitated glucose transporter), member 3	46.9558	1.5346	0.56399	0.947883	0.343189	1
ENSMUSG00000031344	Gabrq	protein_coding	X	72825178	gamma-aminobutyric acid (GABA) A receptor, subunit theta	69.7817	1.52849	0.730462	0.723506	0.469369	1
ENSMUSG00000109880	Gm34096	lincRNA	8	34608305	predicted gene, 34096	1.29193	1.5284	1.34816	0.391946	0.695098	1
ENSMUSG00000079018	Ly6c1	protein_coding	15	75044018	lymphocyte antigen 6 complex, locus C1	3916.73	1.52806	0.394287	1.33928	0.180481	1
ENSMUSG00000053963	Stum	protein_coding	1	180432387	mechanosensory transduction mediator	9.03474	1.52799	0.869965	0.606906	0.543913	1
ENSMUSG00000057067	Olfr297	protein_coding	7	86519968	olfactory receptor 297	1.48128	1.52731	1.4182	0.371817	0.710029	1
ENSMUSG00000044040	Olfr1497	protein_coding	19	13794324	olfactory receptor 1497	0.604409	1.52457	1.82656	0.287193	0.773965	1
ENSMUSG00000030142	Clec4e	protein_coding	6	123281789	C-type lectin domain family 4, member e	51.9381	1.52304	0.666551	0.784689	0.432636	1
ENSMUSG00000020810	Cygb	protein_coding	11	116645595	cytoglobin	51.8162	1.52233	0.556214	0.939087	0.347686	1
ENSMUSG00000042686	Jph1	protein_coding	1	16964560	junctophilin 1	32.0541	1.5218	0.475069	1.09838	0.27204	1
ENSMUSG00000001076	C1ql4	protein_coding	15	99084686	complement component 1, q subcomponent-like 4	0.848497	1.52155	1.47835	0.352793	0.724244	1
ENSMUSG00000105531	4930458A03Rik	lincRNA	5	106351535	RIKEN cDNA 4930458A03 gene	0.846584	1.52146	1.64675	0.31666	0.751502	1
ENSMUSG00000113061	AL607105.1	protein_coding	13	28257528		4.45013	1.52138	0.816639	0.638448	0.523182	1
ENSMUSG00000104956	4930429D17Rik	lincRNA	5	103230375	RIKEN cDNA 4930429D17 gene	2.76823	1.52011	1.01063	0.514638	0.606806	1
ENSMUSG00000050914	Ankrd37	protein_coding	8	45996902	ankyrin repeat domain 37	292.433	1.51912	0.540854	0.959821	0.337146	1
ENSMUSG00000016194	Hsd11b1	protein_coding	1	193221634	hydroxysteroid 11-beta dehydrogenase 1	32.7317	1.51773	0.352921	1.46699	0.142379	1
ENSMUSG00000037737	Actrt3	protein_coding	3	30597073	actin related protein T3	1.59212	1.51559	1.35575	0.380296	0.703726	1
ENSMUSG00000054160	Nkx2-4	protein_coding	2	147083316	NK2 homeobox 4	3.04936	1.51429	0.774912	0.663675	0.506898	1
ENSMUSG00000090658	Prss47	protein_coding	13	65044606	protease, serine 47	1.04769	1.51295	1.49572	0.342944	0.731641	1
ENSMUSG00000039693	Msantd3	protein_coding	4	48539935	Myb/SANT-like DNA-binding domain containing 3	41.1038	1.51214	0.501408	1.0214	0.307063	1
ENSMUSG00000053862	Slc51b	protein_coding	9	65412714	solute carrier family 51, beta subunit	0.8439	1.50901	1.86621	0.272753	0.785043	1
ENSMUSG00000058966	Fam57b	protein_coding	7	126797668	family with sequence similarity 57, member B	4.67655	1.50787	0.964354	0.526641	0.598443	1
ENSMUSG00000034037	Fgd5	protein_coding	6	91978878	FYVE, RhoGEF and PH domain containing 5	34.8529	1.50574	0.453497	1.1152	0.264766	1
ENSMUSG00000094127	G530012D18Rik	protein_coding	1	85575676	RIKEN cDNA G530012D1 gene	2.08099	1.50516	1.0051	0.502599	0.615246	1
ENSMUSG00000105961	Gm40123	lincRNA	3	108226787	predicted gene, 40123	1.22704	1.50318	1.51228	0.332728	0.73934	1
ENSMUSG00000113846	AC125444.2	protein_coding	1	82930571		0.72924	1.50201	2.0321	0.247039	0.804878	1
ENSMUSG00000104675	Gm43689	lincRNA	3	137918019	predicted gene 43689	0.719306	1.50171	1.65697	0.302789	0.762051	1
ENSMUSG00000038086	Hspb2	protein_coding	9	50751078	heat shock protein 2	49.8474	1.49808	0.259316	1.92073	0.054766	1
ENSMUSG00000038550	Ciart	protein_coding	3	95878503	circadian associated repressor of transcription	59.4526	1.49762	0.713709	0.697231	0.485658	1
ENSMUSG00000113919	AC165254.2	lincRNA	13	45246632		0.99496	1.49693	1.76915	0.280884	0.778799	1
ENSMUSG00000030004	Nat8	protein_coding	6	85830388	N-acetyltransferase 8 (GCN5-related)	1.11479	1.49643	1.50191	0.330532	0.740998	1
ENSMUSG00000046618	Olfml2a	protein_coding	2	38931978	olfactomedin-like 2A	170.912	1.49592	0.516641	0.959884	0.337114	1
ENSMUSG00000097289	2010300F17Rik	lincRNA	11	96712982	RIKEN cDNA 2010300F17 gene	6.17943	1.49561	0.814637	0.608382	0.542934	1
ENSMUSG00000062426	Olfr304	protein_coding	7	86385657	olfactory receptor 304	0.355303	1.49547	3.42	0.144873	0.884811	1
ENSMUSG00000114241	AC121599.1	lincRNA	14	20794239		2.04165	1.49477	1.25234	0.395073	0.692789	1
ENSMUSG00000038600	Atp6v0a4	protein_coding	6	38048483	ATPase, H+ transporting, lysosomal V0 subunit A4	3952.73	1.49391	0.500152	0.987517	0.323389	1
ENSMUSG00000038572	Bpifb5	protein_coding	2	154223742	BPI fold containing family B, member 5	28.2784	1.49276	0.750128	0.656897	0.511247	1
ENSMUSG00000096980	Gm26526	lincRNA	7	39588518	predicted gene, 26526	2.64773	1.48935	1.03209	0.474136	0.635403	1
ENSMUSG00000091422	Gm6455	lincRNA	5	10865029	predicted gene 6455	0.347829	1.48904	4.21838	0.115932	0.907706	1
ENSMUSG00000041134	Cyyr1	protein_coding	16	85421533	cysteine and tyrosine-rich protein 1	52.0569	1.48859	0.540868	0.903343	0.366344	1
ENSMUSG00000113276	AC098839.2	lincRNA	13	44092028		1.48716	1.48638	1.23084	0.395161	0.692724	1
ENSMUSG00000056586	Zar1l	protein_coding	5	150507055	zygote arrest 1-like	0.925096	1.48478	1.69932	0.285281	0.775429	1
ENSMUSG00000025892	Gria4	protein_coding	9	4417896	glutamate receptor, ionotropic, AMPA4 (alpha 4)	2.78233	1.48458	0.884349	0.54795	0.583726	1
ENSMUSG00000015843	Rxrg	protein_coding	1	167598384	retinoid X receptor gamma	11.5691	1.48246	0.741133	0.650979	0.51506	1
ENSMUSG00000030247	Kcnj8	protein_coding	6	142564837	potassium inwardly-rectifying channel, subfamily J, member 8	6.68966	1.48128	0.577789	0.832965	0.404864	1
ENSMUSG00000027669	Gnb4	protein_coding	3	32580332	guanine nucleotide binding protein (G protein), beta 4	157.746	1.47948	0.311836	1.5376	0.124147	1
ENSMUSG00000108580	Gm39094	lincRNA	7	129658928	predicted gene, 39094	7.00852	1.47927	0.988322	0.484936	0.627722	1
ENSMUSG00000020871	Dlx4	protein_coding	11	95140447	distal-less homeobox 4	9.50151	1.47806	0.737213	0.648475	0.516678	1
ENSMUSG00000022218	Tgm1	protein_coding	14	55700009	transglutaminase 1, K polypeptide	1324.38	1.4758	0.306601	1.55185	0.120698	1
ENSMUSG00000084906	Gm13794	lincRNA	2	95394242	predicted gene 13794	0.569106	1.47317	1.90984	0.247755	0.804324	1
ENSMUSG00000029576	Radil	protein_coding	5	142484839	Ras association and DIL domains	497.119	1.473	0.481808	0.981716	0.32624	1
ENSMUSG00000105797	Gm5149	lincRNA	3	149304829	predicted gene 5149	0.888381	1.47183	1.58892	0.296952	0.766503	1
ENSMUSG00000104367	Gm38079	lincRNA	1	182976276	predicted gene, 38079	13.5313	1.47082	0.504957	0.932406	0.351127	1
ENSMUSG00000097235	Gm17250	lincRNA	2	71748075	predicted gene, 17250	1.03216	1.47002	1.43305	0.327981	0.742926	1
ENSMUSG00000070323	Mmp27	protein_coding	9	7571396	matrix metallopeptidase 27	3.15057	1.46682	0.9164	0.509409	0.610466	1
ENSMUSG00000050666	Vstm4	protein_coding	14	32856756	V-set and transmembrane domain containing 4	11.5803	1.46643	0.633131	0.736702	0.461304	1
ENSMUSG00000078934	9230113P08Rik	protein_coding	9	35908423	RIKEN cDNA 9230113P08 gene	1.01794	1.46498	2.11792	0.219545	0.826225	1
ENSMUSG00000033255	Gm5134	protein_coding	10	75954514	predicted gene 5134	0.873339	1.46364	1.68582	0.275025	0.783297	1
ENSMUSG00000039672	Kcne2	protein_coding	16	92292389	potassium voltage-gated channel, Isk-related subfamily, gene 2	971.435	1.46364	0.356754	1.2996	0.193739	1
ENSMUSG00000074259	Gramd2	protein_coding	9	59680144	GRAM domain containing 2	3016.99	1.46243	0.393492	1.17519	0.239918	1
ENSMUSG00000110524	Gm39228	lincRNA	8	94183289	predicted gene, 39228	5.76347	1.46217	0.615055	0.751435	0.452391	1
ENSMUSG00000086431	Gm14929	lincRNA	X	119747626	predicted gene 14929	7.03749	1.46152	0.632336	0.729862	0.465475	1
ENSMUSG00000078252	Krtap17-1	protein_coding	11	99993234	keratin associated protein 17-1	44.8838	1.46075	0.46661	0.987448	0.323423	1
ENSMUSG00000000411	Tssk3	protein_coding	4	129489014	testis-specific serine kinase 3	2.20153	1.45969	1.04385	0.440378	0.659663	1
ENSMUSG00000052135	Foxo6	protein_coding	4	120267079	forkhead box O6	56.7471	1.45839	0.387343	1.18343	0.23664	1
ENSMUSG00000107133	Gm42787	lincRNA	5	149128584	predicted gene 42787	1.08643	1.45573	1.40831	0.323599	0.746242	1
ENSMUSG00000043073	Usp17le	protein_coding	7	104768049	ubiquitin specific peptidase 17-like E	0.730035	1.45452	2.29488	0.198057	0.843001	1
ENSMUSG00000029829	Tmem213	protein_coding	6	38109255	transmembrane protein 213	1788.71	1.45367	0.433268	1.0471	0.295054	1
ENSMUSG00000026246	Alppl2	protein_coding	1	87086694	alkaline phosphatase, placental-like 2	1.1227	1.45366	1.74142	0.260514	0.794468	1
ENSMUSG00000041559	Fmod	protein_coding	1	134037254	fibromodulin	13.8145	1.45346	0.596145	0.760648	0.446867	1
ENSMUSG00000051648	Kctd19	protein_coding	8	105382807	potassium channel tetramerisation domain containing 19	2.3447	1.45247	1.50157	0.301333	0.763161	1
ENSMUSG00000027832	Ptx3	protein_coding	3	66219910	pentraxin related gene	11.0171	1.45239	0.559308	0.808846	0.418604	1
ENSMUSG00000074472	Zfp872	protein_coding	9	22188090	zinc finger protein 872	101.428	1.45114	0.447615	1.00788	0.313511	1
ENSMUSG00000020007	Il20ra	protein_coding	10	19712570	interleukin 20 receptor, alpha	0.852668	1.45076	1.56049	0.288859	0.77269	1
ENSMUSG00000092443	Gm20726	protein_coding	14	54632329	predicted gene, 20726	0.355939	1.4492	2.37386	0.189226	0.849916	1
ENSMUSG00000053519	Kcnip1	protein_coding	11	33629339	Kv channel-interacting protein 1	31.5846	1.44838	0.647256	0.692739	0.488473	1
ENSMUSG00000083361	Olfr360	protein_coding	2	37065746	olfactory receptor 360	0.426945	1.44819	2.35733	0.190126	0.84921	1
ENSMUSG00000074783	AU019990	lincRNA	2	132598195	expressed sequence AU019990	5.7821	1.44498	0.976004	0.455915	0.648451	1
ENSMUSG00000047604	Frat2	protein_coding	19	41845972	frequently rearranged in advanced T cell lymphomas 2	541.092	1.44457	0.343935	1.2926	0.196149	1
ENSMUSG00000028865	Cd164l2	protein_coding	4	133212131	CD164 sialomucin-like 2	198.163	1.44427	0.388784	1.14272	0.253155	1
ENSMUSG00000027967	Neurog2	protein_coding	3	127633135	neurogenin 2	2.02495	1.44352	1.16061	0.382143	0.702355	1
ENSMUSG00000053647	Gper1	protein_coding	5	139423151	G protein-coupled estrogen receptor 1	9.29213	1.44183	0.675372	0.654209	0.512977	1
ENSMUSG00000004939	Nmrk2	protein_coding	10	81198170	nicotinamide riboside kinase 2	1.37668	1.44177	1.1981	0.368721	0.712335	1
ENSMUSG00000018339	Gpx3	protein_coding	11	54902453	glutathione peroxidase 3	173.638	1.44029	0.448004	0.98278	0.325716	1
ENSMUSG00000108924	4933436H12Rik	lincRNA	7	68417402	RIKEN cDNA 4933436H12 gene	0.472963	1.44029	2.74044	0.160664	0.872358	1
ENSMUSG00000090691	Gm3667	protein_coding	14	6868502	predicted gene 3667	1.73692	1.43937	2.62624	0.167301	0.867134	1
ENSMUSG00000026228	Htr2b	protein_coding	1	86099026	5-hydroxytryptamine (serotonin) receptor 2B	2.84334	1.43764	1.01153	0.432648	0.66527	1
ENSMUSG00000056487	Mettl7a2	protein_coding	15	100353200	methyltransferase like 7A2	286.296	1.43702	1.22394	0.357059	0.721048	1
ENSMUSG00000082976	Gm15056	protein_coding	8	20900606	predicted gene 15056	0.773843	1.43666	1.71545	0.254547	0.799073	1
ENSMUSG00000016128	Stard13	protein_coding	5	151037510	StAR-related lipid transfer (START) domain containing 13	1446.7	1.43637	0.347744	1.25486	0.209531	1
ENSMUSG00000071226	Cecr2	protein_coding	6	120666369	CECR2, histone acetyl-lysine reader	557.882	1.43545	0.287957	1.51222	0.130477	1
ENSMUSG00000031809	1700018B08Rik	protein_coding	8	121530780	RIKEN cDNA 1700018B08 gene	0.465873	1.43515	3.36275	0.129402	0.89704	1
ENSMUSG00000095212	Olfr473	protein_coding	7	107930446	olfactory receptor 473	0.86526	1.43513	1.56156	0.278648	0.780515	1
ENSMUSG00000075334	Rprm	protein_coding	2	54084093	reprimo, TP53 dependent G2 arrest mediator candidate	315.106	1.43227	0.320244	1.34981	0.177075	1
ENSMUSG00000061100	Retnla	protein_coding	16	48842552	resistin like alpha	27460.6	1.43143	0.681462	0.633094	0.526672	1
ENSMUSG00000087247	Alkal1	protein_coding	1	6359218	ALK and LTK ligand 1	64.9298	1.43137	0.635135	0.679182	0.497023	1
ENSMUSG00000054827	Cyp2c50	protein_coding	19	40089688	cytochrome P450, family 2, subfamily c, polypeptide 50	1.18376	1.43058	1.38116	0.311748	0.755232	1
ENSMUSG00000101287	Gm28166	lincRNA	9	100450322	predicted gene 28166	4.53786	1.42943	0.847261	0.50685	0.61226	1
ENSMUSG00000089715	Cbx6	protein_coding	15	79823896	chromobox 6	3748.41	1.4287	0.314784	1.36189	0.173234	1
ENSMUSG00000040260	Daam2	protein_coding	17	49456022	dishevelled associated activator of morphogenesis 2	1131.8	1.42689	0.31293	1.36418	0.172512	1
ENSMUSG00000056004	9330182L06Rik	protein_coding	5	9266118	RIKEN cDNA 9330182L06 gene	529.096	1.42653	0.632166	0.67471	0.49986	1
ENSMUSG00000041378	Cldn5	protein_coding	16	18776847	claudin 5	57.5932	1.42521	0.408296	1.04144	0.297674	1
ENSMUSG00000051599	Pcdhb2	protein_coding	18	37294812	protocadherin beta 2	1.18787	1.42466	1.66964	0.254342	0.799231	1
ENSMUSG00000053552	Ebf4	protein_coding	2	130295169	early B cell factor 4	7.10213	1.42443	0.760549	0.55806	0.576803	1
ENSMUSG00000071275	Fpr-rs6	protein_coding	17	20182078	formyl peptide receptor, related sequence 6	0.620119	1.42397	2.21619	0.191304	0.848288	1
ENSMUSG00000058057	Mettl7a3	protein_coding	15	100334929	methyltransferase like 7A3	429.783	1.42385	1.12268	0.377535	0.705776	1
ENSMUSG00000020218	Wif1	protein_coding	10	121033960	Wnt inhibitory factor 1	12.8328	1.42284	0.89602	0.47191	0.636991	1
ENSMUSG00000074885	Gm10782	lincRNA	13	56362900	predicted gene 10782	1.83851	1.42265	1.90321	0.222074	0.824256	1
ENSMUSG00000045532	C1ql1	protein_coding	11	102939264	complement component 1, q subcomponent-like 1	1.95424	1.4222	1.06746	0.395524	0.692456	1
ENSMUSG00000086646	Platr20	lincRNA	11	51189833	pluripotency associated transcript 20	0.859389	1.42196	1.95379	0.215971	0.829011	1
ENSMUSG00000005202	Shbg	protein_coding	11	69614804	sex hormone binding globulin	3.00971	1.42189	0.905553	0.465892	0.641293	1
ENSMUSG00000046794	Ppp1r3b	protein_coding	8	35375739	protein phosphatase 1, regulatory (inhibitor) subunit 3B	326.983	1.41956	0.924201	0.453968	0.649852	1
ENSMUSG00000073293	Nudt10	protein_coding	X	6168696	nudix (nucleoside diphosphate linked moiety X)-type motif 10	19.0458	1.41895	0.523568	0.800184	0.423604	1
ENSMUSG00000090298	Sult3a2	protein_coding	10	33766424	sulfotransferase family 3A, member 2	0.733086	1.41796	1.78675	0.23392	0.815047	1
ENSMUSG00000032243	Itga11	protein_coding	9	62677826	integrin alpha 11	124.917	1.41624	0.571782	0.727972	0.46663	1
ENSMUSG00000074871	Ctsm	protein_coding	13	61535743	cathepsin M	1.88726	1.41583	1.34267	0.3097	0.756789	1
ENSMUSG00000033061	Resp18	protein_coding	1	75272199	regulated endocrine-specific protein 18	6.08139	1.41521	1.21558	0.341571	0.732674	1
ENSMUSG00000030844	Rgs10	protein_coding	7	128373621	regulator of G-protein signalling 10	608.799	1.414	0.366832	1.12858	0.259076	1
ENSMUSG00000104619	Gm42678	lincRNA	3	102599373	predicted gene 42678	2.10845	1.41385	0.981285	0.421745	0.673211	1
ENSMUSG00000011154	Cfap161	protein_coding	7	83774101	cilia and flagella associated protein 161	4.72257	1.41343	1.14056	0.362476	0.716996	1
ENSMUSG00000049539	Hist1h1a	protein_coding	13	23763666	histone cluster 1, H1a	1.88311	1.41314	1.05001	0.393464	0.693977	1
ENSMUSG00000021301	Hecw1	protein_coding	13	14226438	HECT, C2 and WW domain containing E3 ubiquitin protein ligase 1	595.606	1.41225	0.442005	0.932686	0.350982	1
ENSMUSG00000022893	Adamts1	protein_coding	16	85793827	a disintegrin-like and metallopeptidase (reprolysin type) with thrombospondin type 1 motif, 1	1385.92	1.41204	0.834389	0.493819	0.621434	1
ENSMUSG00000028640	Tfap2c	protein_coding	2	172549593	transcription factor AP-2, gamma	2.47458	1.41201	1.4209	0.289968	0.771841	1
ENSMUSG00000054944	5330416C01Rik	lincRNA	13	97733498	RIKEN cDNA 5330416C01 gene	6.1953	1.41198	0.959665	0.4293	0.667705	1
ENSMUSG00000098534	Gm27167	lincRNA	8	86902453	predicted gene 27167	0.559339	1.41105	2.35597	0.17447	0.861496	1
ENSMUSG00000030474	Siglece	protein_coding	7	43651070	sialic acid binding Ig-like lectin E	16.5418	1.41061	0.463466	0.885956	0.375641	1
ENSMUSG00000033007	Asic4	protein_coding	1	75450436	acid-sensing (proton-gated) ion channel family member 4	3.92043	1.41042	0.752907	0.545107	0.58568	1
ENSMUSG00000097997	Gm27017	lincRNA	14	61648950	predicted gene, 27017	1.9888	1.41021	1.13677	0.36086	0.718204	1
ENSMUSG00000111098	AC132232.1	lincRNA	10	41035195		0.733363	1.41018	2.01742	0.203317	0.838887	1
ENSMUSG00000039543	Cfap70	protein_coding	14	20394193	cilia and flagella associated protein 70	8.72868	1.40807	0.84707	0.481738	0.629992	1
ENSMUSG00000034205	Loxl2	protein_coding	14	69609068	lysyl oxidase-like 2	27.2354	1.40712	0.376421	1.08155	0.279453	1
ENSMUSG00000097542	Gm26751	lincRNA	14	55864311	predicted gene, 26751	3.96143	1.40654	4.01182	0.101337	0.919283	1
ENSMUSG00000039481	Nrtn	protein_coding	17	56751325	neurturin	34.2447	1.40654	0.293874	1.38337	0.166552	1
ENSMUSG00000042417	Ccno	protein_coding	13	112987802	cyclin O	53.6386	1.40284	0.475897	0.846482	0.397284	1
ENSMUSG00000044994	Olfr1426	protein_coding	19	12086746	olfactory receptor 1426	1.30209	1.40182	1.546	0.259913	0.794931	1
ENSMUSG00000032194	Kank2	protein_coding	9	21766784	KN motif and ankyrin repeat domains 2	4339.64	1.40105	0.28453	1.40953	0.158678	1
ENSMUSG00000076430	Hus1b	protein_coding	13	30946573	HUS1 checkpoint clamp component B	1.91415	1.40064	1.12515	0.356077	0.721783	1
ENSMUSG00000078315	Fam47c	protein_coding	X	78737763	family with sequence similarity 47, member C	0.322094	1.39921	2.84482	0.140328	0.888401	1
ENSMUSG00000032671	A930018P22Rik	protein_coding	2	104122769	RIKEN cDNA A930018P22 gene	0.376708	1.3987	2.79731	0.142529	0.886662	1
ENSMUSG00000057280	Musk	protein_coding	4	58285960	muscle, skeletal, receptor tyrosine kinase	0.825286	1.39828	1.70212	0.23399	0.814993	1
ENSMUSG00000079263	Gm6614	protein_coding	6	141971845	predicted gene 6614	0.361394	1.39803	3.50685	0.113501	0.909633	1
ENSMUSG00000043251	Exoc3l	protein_coding	8	105289924	exocyst complex component 3-like	69.3624	1.3973	0.448829	0.885184	0.376057	1
ENSMUSG00000104800	Gm36017	lincRNA	5	44412793	predicted gene, 36017	1.85317	1.39575	1.29991	0.304443	0.76079	1
ENSMUSG00000114879	AC140210.1	lincRNA	13	114586513		1.51966	1.39555	1.14039	0.346852	0.728702	1
ENSMUSG00000102608	Gm37267	lincRNA	1	180508778	predicted gene, 37267	0.455732	1.39363	4.20197	0.0936764	0.925366	1
ENSMUSG00000026885	Ttll11	protein_coding	2	35751241	tubulin tyrosine ligase-like family, member 11	28.6881	1.39227	0.547163	0.716921	0.473423	1
ENSMUSG00000051896	Tex37	protein_coding	6	70913087	testis expressed 37	0.388876	1.3916	2.82503	0.138618	0.889752	1
ENSMUSG00000033053	1700028P14Rik	protein_coding	19	23558760	RIKEN cDNA 1700028P14 gene	0.620641	1.39094	2.10002	0.186161	0.852319	1
ENSMUSG00000090958	Lrrc32	protein_coding	7	98489283	leucine rich repeat containing 32	26.4213	1.39088	0.610149	0.640637	0.521758	1
ENSMUSG00000029711	Epo	protein_coding	5	137483020	erythropoietin	2.97725	1.39011	1.10807	0.352064	0.72479	1
ENSMUSG00000004105	Angptl2	protein_coding	2	33216069	angiopoietin-like 2	118.666	1.38992	0.392135	0.994359	0.320048	1
ENSMUSG00000032010	Usp2	protein_coding	9	44067021	ubiquitin specific peptidase 2	36.9541	1.38922	0.599571	0.649165	0.516232	1
ENSMUSG00000020044	Timp3	protein_coding	10	86300372	tissue inhibitor of metalloproteinase 3	8154.61	1.38856	0.31716	1.22514	0.220524	1
ENSMUSG00000022875	Kng1	protein_coding	16	23057865	kininogen 1	22.6594	1.38794	0.701285	0.553186	0.580136	1
ENSMUSG00000072934	Trpc5os	protein_coding	X	144456581	transient receptor potential cation channel, subfamily C, member 5, opposite strand	2.75959	1.38756	0.882665	0.439085	0.6606	1
ENSMUSG00000086903	Hotair	lincRNA	15	102944062	HOX transcript antisense RNA (non-protein coding)	0.406498	1.38744	2.77281	0.139728	0.888875	1
ENSMUSG00000097602	4930519P11Rik	protein_coding	2	154612937	RIKEN cDNA 4930519P11 gene	0.915515	1.3871	1.81106	0.213744	0.830747	1
ENSMUSG00000095498	Ifna1	protein_coding	4	88850087	interferon alpha 1	0.416088	1.38699	4.21838	0.0917392	0.926905	1
ENSMUSG00000030443	Zfp583	protein_coding	7	6315660	zinc finger protein 583	10.7524	1.38654	0.627333	0.61617	0.537782	1
ENSMUSG00000100844	1810007C17Rik	lincRNA	12	49476991	RIKEN cDNA 1810007C17 gene	0.768118	1.38588	1.69696	0.227396	0.820116	1
ENSMUSG00000099498	Gm29283	lincRNA	1	13068838	predicted gene 29283	0.590894	1.38588	1.77464	0.217442	0.827864	1
ENSMUSG00000091306	Gm17606	protein_coding	14	54640952	predicted gene, 17606	0.552936	1.38588	2.71866	0.141937	0.88713	1
ENSMUSG00000071586	Gm10337	protein_coding	15	102503722	predicted gene 10337	0.777188	1.38588	3.14492	0.122699	0.902346	1
ENSMUSG00000085187	Gm13860	lincRNA	6	34533553	predicted gene 13860	0.338437	1.38587	2.8541	0.1352	0.892454	1
ENSMUSG00000079383	Gm3298	protein_coding	14	5015891	predicted gene 3298	0.574923	1.38587	4.21838	0.0914735	0.927116	1
ENSMUSG00000044787	Spata32	protein_coding	11	103208127	spermatogenesis associated 32	0.459221	1.38568	2.32844	0.165639	0.868441	1
ENSMUSG00000089722	Cd300ld5	protein_coding	11	115031486	CD300 molecule like family member D5	2.69292	1.38546	1.93822	0.198871	0.842364	1
ENSMUSG00000085428	Gm14344	lincRNA	2	180836481	predicted gene 14344	0.456702	1.38514	2.67056	0.144217	0.885329	1
ENSMUSG00000041789	2700046A07Rik	lincRNA	18	62751674	RIKEN cDNA 2700046A07 gene	2.01731	1.38489	0.996784	0.386135	0.699397	1
ENSMUSG00000071392	Ect2l	protein_coding	10	18128903	epithelial cell transforming sequence 2 oncogene-like	3.52177	1.3837	1.34598	0.285075	0.775587	1
ENSMUSG00000027947	Il6ra	protein_coding	3	89864059	interleukin 6 receptor, alpha	552.148	1.38362	0.364156	1.05344	0.29214	1
ENSMUSG00000037446	Tulp1	protein_coding	17	28351515	tubby like protein 1	116.839	1.38347	0.409531	0.936358	0.349089	1
ENSMUSG00000033825	Tpsb2	protein_coding	17	25366550	tryptase beta 2	0.678166	1.38346	2.33666	0.164104	0.869649	1
ENSMUSG00000035033	Tbr1	protein_coding	2	61802930	T-box brain gene 1	7.51556	1.38304	0.727262	0.526686	0.598412	1
ENSMUSG00000078497	Zfp978	protein_coding	4	147361303	zinc finger protein 978	0.556385	1.38303	4.13257	0.0926864	0.926153	1
ENSMUSG00000091526	BB019430	lincRNA	10	58696745	expressed sequence BB019430	0.973725	1.38302	1.74726	0.219212	0.826485	1
ENSMUSG00000054690	Emcn	protein_coding	3	137341067	endomucin	36.7569	1.38295	0.47799	0.801163	0.423037	1
ENSMUSG00000069189	Zdhhc11	protein_coding	13	73963851	zinc finger, DHHC domain containing 11	0.408994	1.38289	2.10566	0.181838	0.85571	1
ENSMUSG00000030930	Chst15	protein_coding	7	132235780	carbohydrate (N-acetylgalactosamine 4-sulfate 6-O) sulfotransferase 15	438.53	1.38274	0.292688	1.30767	0.190985	1
ENSMUSG00000049604	Hoxb13	protein_coding	11	96194316	homeobox B13	2.13301	1.38217	1.04701	0.365007	0.715106	1
ENSMUSG00000070691	Runx3	protein_coding	4	135120652	runt related transcription factor 3	23.5929	1.38199	0.917364	0.416401	0.677117	1
ENSMUSG00000021095	Gsc	protein_coding	12	104471209	goosecoid homeobox	0.95855	1.38176	1.92216	0.198609	0.842569	1
ENSMUSG00000062028	Irgc1	protein_coding	7	24431922	immunity-related GTPase family, cinema 1	3.72917	1.38131	0.901453	0.422993	0.672301	1
ENSMUSG00000113220	AC161052.2	lincRNA	12	12987317		0.660389	1.38101	1.87646	0.203048	0.839097	1
ENSMUSG00000109850	Gm45692	protein_coding	8	26119534	predicted gene 45692	2.02036	1.38076	1.67212	0.227712	0.81987	1
ENSMUSG00000032098	Treh	protein_coding	9	44673233	trehalase (brush-border membrane glycoprotein)	0.324768	1.37953	2.42155	0.15673	0.875458	1
ENSMUSG00000074928	Krtap14	protein_coding	16	88818667	keratin associated protein 14	3.6897	1.37938	1.115	0.340253	0.733666	1
ENSMUSG00000029282	Amtn	protein_coding	5	88376108	amelotin	0.336056	1.37877	2.83939	0.133398	0.893878	1
ENSMUSG00000105039	Gm32585	lincRNA	5	125238314	predicted gene, 32585	0.536608	1.37812	2.45745	0.153865	0.877716	1
ENSMUSG00000025496	Drd4	protein_coding	7	141292006	dopamine receptor D4	8.58362	1.37657	0.633113	0.594786	0.551987	1
ENSMUSG00000019359	Gdpd2	protein_coding	X	100729873	glycerophosphodiester phosphodiesterase domain containing 2	240.942	1.37498	0.685253	0.547212	0.584233	1
ENSMUSG00000075136	Olfr1164	protein_coding	2	88092855	olfactory receptor 1164	0.642558	1.37443	2.08779	0.179344	0.857668	1
ENSMUSG00000084796	Mir142hg	lincRNA	11	87755577	Mir142 host gene (non-protein coding)	1.86428	1.37333	1.19176	0.313261	0.754083	1
ENSMUSG00000062608	Olfr195	protein_coding	16	59147046	olfactory receptor 195	0.639771	1.3733	1.78271	0.209402	0.834135	1
ENSMUSG00000104417	Gm37068	lincRNA	1	35625606	predicted gene, 37068	0.34279	1.37314	2.39939	0.155516	0.876415	1
ENSMUSG00000092049	Vmn2r4	protein_coding	3	64388621	vomeronasal 2, receptor 4	0.569795	1.37277	2.33406	0.159707	0.873112	1
ENSMUSG00000059463	Spag11b	protein_coding	8	19140759	sperm associated antigen 11B	14.383	1.37244	1.00594	0.37024	0.711203	1
ENSMUSG00000056481	Cd248	protein_coding	19	5068078	CD248 antigen, endosialin	8.70034	1.37206	0.698991	0.532276	0.594535	1
ENSMUSG00000067173	Mrgpra4	protein_coding	7	47980837	MAS-related GPR, member A4	0.561328	1.37179	2.74166	0.135608	0.892131	1
ENSMUSG00000055148	Klf2	protein_coding	8	72319033	Kruppel-like factor 2 (lung)	995.328	1.37159	0.411882	0.902172	0.366965	1
ENSMUSG00000111180	AC160394.3	lincRNA	9	61049009		1.46779	1.3713	1.23387	0.300922	0.763474	1
ENSMUSG00000032356	Rasgrf1	protein_coding	9	89909908	RAS protein-specific guanine nucleotide-releasing factor 1	860.587	1.37045	0.463277	0.799636	0.423922	1
ENSMUSG00000046450	Olfr71	protein_coding	4	43704562	olfactory receptor 71	6.18889	1.37044	0.755626	0.490246	0.62396	1
ENSMUSG00000034987	Hrh2	protein_coding	13	54192129	histamine receptor H2	36.8931	1.37026	0.430446	0.860173	0.389693	1
ENSMUSG00000103392	Gm38303	protein_coding	3	10321712	predicted gene, 38303	0.685825	1.36954	2.92894	0.126168	0.899599	1
ENSMUSG00000027643	Ghrh	protein_coding	2	157329497	growth hormone releasing hormone	0.44175	1.36941	2.72718	0.135457	0.892251	1
ENSMUSG00000109634	Gm45474	lincRNA	7	47049889	predicted gene 45474	0.421345	1.36929	2.07477	0.177992	0.858729	1
ENSMUSG00000026580	Selp	protein_coding	1	164115264	selectin, platelet	10.6885	1.36917	1.00747	0.36643	0.714044	1
ENSMUSG00000085293	Gm13817	lincRNA	2	92529694	predicted gene 13817	0.454898	1.36905	2.39555	0.154056	0.877565	1
ENSMUSG00000027408	Cpxm1	protein_coding	2	130390775	carboxypeptidase X 1 (M14 family)	17.5517	1.36854	0.553729	0.665568	0.505687	1
ENSMUSG00000039542	Ncam1	protein_coding	9	49502136	neural cell adhesion molecule 1	29.3187	1.36657	1.12334	0.326322	0.744181	1
ENSMUSG00000042092	Lce1c	protein_coding	3	92679247	late cornified envelope 1C	0.443132	1.36583	2.77841	0.131668	0.895247	1
ENSMUSG00000024620	Pdgfrb	protein_coding	18	61045150	platelet derived growth factor receptor, beta polypeptide	65.6041	1.3645	0.541668	0.672927	0.500994	1
ENSMUSG00000044055	Otos	protein_coding	1	92644218	otospiralin	3.05578	1.36328	1.05863	0.343158	0.73148	1
ENSMUSG00000073110	Olfr444	protein_coding	6	42949067	olfactory receptor 444	0.372404	1.36312	3.44515	0.1054	0.916059	1
ENSMUSG00000062483	Vmn1r171	protein_coding	7	23631988	vomeronasal 1 receptor 171	0.383431	1.36252	2.37555	0.152605	0.87871	1
ENSMUSG00000038011	Dnah10	protein_coding	5	124725085	dynein, axonemal, heavy chain 10	12.2873	1.36116	0.792827	0.455532	0.648726	1
ENSMUSG00000110037	4930543N07Rik	lincRNA	7	138554230	RIKEN cDNA 4930543N07 gene	0.904616	1.36108	1.42313	0.25372	0.799712	1
ENSMUSG00000114017	AC154269.1	lincRNA	13	6995654		1.51041	1.36095	1.17769	0.30649	0.759231	1
ENSMUSG00000096365	Olfr1463	protein_coding	19	13231328	olfactory receptor 1463	0.485971	1.36046	2.38254	0.151292	0.879745	1
ENSMUSG00000026249	Serpine2	protein_coding	1	79794197	serine (or cysteine) peptidase inhibitor, clade E, member 2	3105.6	1.36028	0.330293	1.09079	0.275366	1
ENSMUSG00000087491	Gm14552	lincRNA	X	34974042	predicted gene 14552	0.654767	1.35927	1.87791	0.191313	0.84828	1
ENSMUSG00000092219	Gm20443	lincRNA	17	35737734	predicted gene 20443	1.1553	1.35867	1.37197	0.261429	0.793762	1
ENSMUSG00000095629	Vmn1r89	protein_coding	7	13219339	vomeronasal 1 receptor 89	0.502962	1.35762	2.14035	0.167084	0.867304	1
ENSMUSG00000042821	Snai1	protein_coding	2	167538195	snail family zinc finger 1	10.0918	1.35748	0.529332	0.675342	0.499458	1
ENSMUSG00000093934	Olfr971	protein_coding	9	39836876	olfactory receptor 971	0.941685	1.35657	1.65581	0.215347	0.829497	1
ENSMUSG00000111520	AC166902.2	lincRNA	9	52402096		0.69721	1.35599	1.68688	0.211037	0.832859	1
ENSMUSG00000029306	Ibsp	protein_coding	5	104299171	integrin binding sialoprotein	12.1556	1.3544	0.513578	0.690064	0.490154	1
ENSMUSG00000032334	Loxl1	protein_coding	9	58287738	lysyl oxidase-like 1	26.6966	1.35217	0.490768	0.717597	0.473006	1
ENSMUSG00000059504	Olfr314	protein_coding	11	58782952	olfactory receptor 314	2.99105	1.35026	1.0465	0.3347	0.737852	1
ENSMUSG00000099996	Gm29065	lincRNA	1	76016658	predicted gene 29065	5.66507	1.35025	1.13929	0.307431	0.758515	1
ENSMUSG00000028036	Ptgfr	protein_coding	3	151796502	prostaglandin F receptor	24.2933	1.35012	0.98967	0.353777	0.723506	1
ENSMUSG00000030782	Tgfb1i1	protein_coding	7	128246812	transforming growth factor beta 1 induced transcript 1	119.92	1.34851	0.279452	1.2471	0.21236	1
ENSMUSG00000078502	Gm13212	protein_coding	4	145585166	predicted gene 13212	5.16822	1.34665	1.19925	0.289054	0.77254	1
ENSMUSG00000030934	Oat	protein_coding	7	132557478	ornithine aminotransferase	4647.65	1.34612	0.260573	1.32832	0.184073	1
ENSMUSG00000040133	Gpr176	protein_coding	2	118277110	G protein-coupled receptor 176	21.5434	1.34574	0.346423	0.998026	0.318267	1
ENSMUSG00000035245	Eogt	protein_coding	6	97110024	EGF domain-specific O-linked N-acetylglucosamine (GlcNAc) transferase	1151.92	1.34536	0.26809	1.28823	0.197665	1
ENSMUSG00000051490	Foxd4	protein_coding	19	24898965	forkhead box D4	0.820343	1.3452	1.655	0.208582	0.834775	1
ENSMUSG00000054641	Mmrn1	protein_coding	6	60924976	multimerin 1	7.10065	1.34462	0.736673	0.467805	0.639924	1
ENSMUSG00000066363	Serpina3f	protein_coding	12	104214544	serine (or cysteine) peptidase inhibitor, clade A, member 3F	8.56726	1.34443	0.869546	0.396103	0.692029	1
ENSMUSG00000057722	Lepr	protein_coding	4	101717404	leptin receptor	39.2219	1.34411	0.865596	0.39754	0.690969	1
ENSMUSG00000005892	Trh	protein_coding	6	92242061	thyrotropin releasing hormone	1.67201	1.34286	1.29122	0.265533	0.790599	1
ENSMUSG00000108822	Gm44787	lincRNA	11	79258586	predicted gene 44787	5.04745	1.34271	1.77091	0.193525	0.846548	1
ENSMUSG00000034898	Filip1	protein_coding	9	79815051	filamin A interacting protein 1	1043.4	1.34264	0.483555	0.708595	0.478576	1
ENSMUSG00000041577	Prelp	protein_coding	1	133910304	proline arginine-rich end leucine-rich repeat	97.4394	1.34225	0.469748	0.728579	0.466259	1
ENSMUSG00000111778	AC158624.1	lincRNA	10	31006412		0.618919	1.34153	1.89491	0.180237	0.856967	1
ENSMUSG00000028214	Gem	protein_coding	4	11704457	GTP binding protein (gene overexpressed in skeletal muscle)	475.582	1.34143	0.39315	0.868446	0.38515	1
ENSMUSG00000055865	Fam19a3	protein_coding	3	104767406	family with sequence similarity 19, member A3	13.7534	1.34113	0.670427	0.50883	0.610871	1
ENSMUSG00000108530	4930429H19Rik	lincRNA	7	73310380	RIKEN cDNA 4930429H19 gene	1.45915	1.34113	1.22845	0.277687	0.781252	1
ENSMUSG00000026347	Tmem163	protein_coding	1	127486546	transmembrane protein 163	1916.05	1.34102	0.359887	0.947573	0.343347	1
ENSMUSG00000079588	Tmem182	protein_coding	1	40805601	transmembrane protein 182	1.76627	1.34037	1.03762	0.328031	0.742889	1
ENSMUSG00000103908	Gm37502	lincRNA	1	170175382	predicted gene, 37502	0.332995	1.34035	2.40988	0.141232	0.887686	1
ENSMUSG00000042812	Foxf1	protein_coding	8	121084386	forkhead box F1	44.2628	1.33915	0.384617	0.881778	0.377897	1
ENSMUSG00000031340	Gabre	protein_coding	X	72255999	gamma-aminobutyric acid (GABA) A receptor, subunit epsilon	146.096	1.33808	0.352723	0.958494	0.337814	1
ENSMUSG00000075140	Olfr73	protein_coding	2	88032288	olfactory receptor 73	5.50798	1.33763	1.00143	0.337149	0.736004	1
ENSMUSG00000025141	Myadml2	protein_coding	11	120646031	myeloid-associated differentiation marker-like 2	9.60702	1.33704	0.744887	0.452474	0.650928	1
ENSMUSG00000078350	Smim1	protein_coding	4	154020470	small integral membrane protein 1	1042.88	1.33582	0.22824	1.47133	0.141201	1
ENSMUSG00000044807	Zfp354c	protein_coding	11	50811086	zinc finger protein 354C	48.058	1.33546	0.451273	0.743357	0.457266	1
ENSMUSG00000084937	Gm11228	lincRNA	4	71075109	predicted gene 11228	1.15416	1.3339	1.61448	0.206813	0.836156	1
ENSMUSG00000045350	Fam186a	protein_coding	15	99918348	family with sequence similarity 186, member A	5.85566	1.33304	0.689988	0.482676	0.629326	1
ENSMUSG00000042750	Bex2	protein_coding	X	136066564	brain expressed X-linked 2	697.284	1.33097	0.43028	0.769207	0.441771	1
ENSMUSG00000006056	Calcoco2	protein_coding	11	96099326	calcium binding and coiled-coil domain 2	1.24714	1.33061	1.40679	0.235006	0.814204	1
ENSMUSG00000039518	Cdsn	protein_coding	17	35552128	corneodesmosin	84.759	1.33038	0.442064	0.747359	0.454847	1
ENSMUSG00000034467	Dynlrb2	protein_coding	8	116504974	dynein light chain roadblock-type 2	41.8703	1.32748	0.351437	0.931844	0.351417	1
ENSMUSG00000030351	Tspan11	protein_coding	6	127887589	tetraspanin 11	5789.63	1.32627	0.270849	1.20462	0.228351	1
ENSMUSG00000113737	AC160765.1	lincRNA	13	52729615		7.74707	1.32412	0.569595	0.569035	0.569332	1
ENSMUSG00000030463	4933421I07Rik	protein_coding	7	42445462	RIKEN cDNA 4933421I07 gene	0.670744	1.32354	1.91166	0.169247	0.865602	1
ENSMUSG00000097248	Gm2694	lincRNA	8	87460469	predicted gene 2694	60.2552	1.32131	1.04783	0.306644	0.759114	1
ENSMUSG00000060180	Myh13	protein_coding	11	67321658	myosin, heavy polypeptide 13, skeletal muscle	105.689	1.32074	0.434657	0.737908	0.460571	1
ENSMUSG00000023031	Cela1	protein_coding	15	100674425	chymotrypsin-like elastase family, member 1	372.242	1.31854	0.42116	0.756337	0.449447	1
ENSMUSG00000037492	Zmat4	protein_coding	8	23636019	zinc finger, matrin type 4	108.354	1.31802	1.12191	0.283462	0.776823	1
ENSMUSG00000104346	Pcdhga3	protein_coding	18	37674307	protocadherin gamma subfamily A, 3	42.2527	1.31671	0.515079	0.614868	0.538642	1
ENSMUSG00000038402	Foxf2	protein_coding	13	31625816	forkhead box F2	7.85466	1.31577	0.666055	0.474086	0.635438	1
ENSMUSG00000094673	Olfr1354	protein_coding	10	78913171	olfactory receptor 1354	1.47433	1.31528	1.2589	0.250437	0.802249	1
ENSMUSG00000029287	Tgfbr3	protein_coding	5	107106570	transforming growth factor, beta receptor III	746.074	1.31515	0.305076	1.03303	0.301588	1
ENSMUSG00000055789	E330017A01Rik	protein_coding	16	58635167	RIKEN cDNA E330017A01 gene	1.42327	1.31515	1.18994	0.264845	0.791129	1
ENSMUSG00000108861	5930435M05Rik	lincRNA	7	83178570	RIKEN cDNA 5930435M05 gene	7.0279	1.31493	1.03395	0.304589	0.760679	1
ENSMUSG00000006488	Prl7a1	protein_coding	13	27633366	prolactin family 7, subfamily a, member 1	0.383554	1.31469	3.35683	0.0937477	0.92531	1
ENSMUSG00000035211	Xrra1	protein_coding	7	99859116	X-ray radiation resistance associated 1	11.0343	1.31438	0.586399	0.536111	0.591882	1
ENSMUSG00000044106	Olfr868	protein_coding	9	20098626	olfactory receptor 868	1.75612	1.31427	1.03342	0.304108	0.761045	1
ENSMUSG00000058571	Gpc6	protein_coding	14	116925297	glypican 6	762.798	1.31305	0.388299	0.806209	0.420122	1
ENSMUSG00000103586	5830405F06Rik	lincRNA	6	41055883	RIKEN cDNA 5830405F06 gene	0.432351	1.31302	3.36285	0.0930818	0.925839	1
ENSMUSG00000051986	A530006G24Rik	lincRNA	2	147710693	RIKEN cDNA A530006G24 gene	1.71867	1.31263	1.10142	0.283843	0.776531	1
ENSMUSG00000036242	3632451O06Rik	protein_coding	14	49681560	RIKEN cDNA 3632451O06 gene	2.97493	1.31184	1.12201	0.277927	0.781068	1
ENSMUSG00000047497	Adamts12	protein_coding	15	11064790	a disintegrin-like and metallopeptidase (reprolysin type) with thrombospondin type 1 motif, 12	6.84897	1.3107	0.496573	0.625686	0.531521	1
ENSMUSG00000114577	AC121137.1	lincRNA	14	28777427		0.978892	1.30998	1.53926	0.201384	0.840398	1
ENSMUSG00000078640	Gm11627	protein_coding	11	102576398	predicted gene 11627	22.2521	1.30962	0.650593	0.475907	0.63414	1
ENSMUSG00000110408	Gm45881	lincRNA	9	117708192	predicted gene 45881	0.846778	1.3089	1.52972	0.20193	0.839971	1
ENSMUSG00000106140	Gm42208	lincRNA	3	36272327	predicted gene, 42208	1.13181	1.30776	1.43198	0.214919	0.829831	1
ENSMUSG00000100891	2810049E08Rik	lincRNA	13	83891208	RIKEN cDNA 2810049E08 gene	2.6956	1.3071	1.00127	0.306714	0.759061	1
ENSMUSG00000087648	E130018N17Rik	lincRNA	2	168152603	RIKEN cDNA E130018N17 gene	2.94296	1.30679	1.00344	0.305744	0.7598	1
ENSMUSG00000034839	Larp6	protein_coding	9	60712989	La ribonucleoprotein domain family, member 6	2.22785	1.30539	0.915133	0.333712	0.738597	1
ENSMUSG00000021453	Gadd45g	protein_coding	13	51846678	growth arrest and DNA-damage-inducible 45 gamma	1182.05	1.30493	0.356172	0.856129	0.391926	1
ENSMUSG00000062778	Chia1	protein_coding	3	106113229	chitinase, acidic 1	6218.01	1.3048	0.508622	0.599265	0.548996	1
ENSMUSG00000069378	Prdm6	protein_coding	18	53464546	PR domain containing 6	4.58883	1.30307	0.697644	0.434414	0.663988	1
ENSMUSG00000025916	Ppp1r42	protein_coding	1	9968624	protein phosphatase 1, regulatory subunit 42	0.86219	1.30268	1.44061	0.210106	0.833585	1
ENSMUSG00000090486	BC035947	protein_coding	1	78497026	cDNA sequence BC035947	18.6073	1.3025	0.499605	0.605468	0.544868	1
ENSMUSG00000085053	Gm14809	lincRNA	X	99409571	predicted gene 14809	0.671106	1.30244	2.53926	0.119104	0.905193	1
ENSMUSG00000032285	Dnaja4	protein_coding	9	54698873	DnaJ heat shock protein family (Hsp40) member A4	467.751	1.30198	0.370588	0.814879	0.415141	1
ENSMUSG00000043087	Olfr855	protein_coding	9	19582617	olfactory receptor 855	0.638007	1.30165	1.60543	0.187892	0.850962	1
ENSMUSG00000035783	Acta2	protein_coding	19	34241090	actin, alpha 2, smooth muscle, aorta	46.1443	1.30065	0.535095	0.561857	0.574214	1
ENSMUSG00000095595	Fam177a	protein_coding	12	55124469	family with sequence similarity 177, member A	25.4158	1.30003	2.50605	0.119724	0.904702	1
ENSMUSG00000062713	Sim2	protein_coding	16	94085260	single-minded homolog 2 (Drosophila)	7.06543	1.29985	0.685692	0.437302	0.661892	1
ENSMUSG00000039070	Cpa4	protein_coding	6	30568369	carboxypeptidase A4	3.9184	1.29965	0.766315	0.391024	0.69578	1
ENSMUSG00000098088	Gm26916	lincRNA	14	61629484	predicted gene, 26916	2.96994	1.29946	1.23738	0.242013	0.80877	1
ENSMUSG00000048933	Olfr722	protein_coding	14	49894258	olfactory receptor 722	0.842423	1.29824	2.14884	0.138791	0.889615	1
ENSMUSG00000099349	1700047G03Rik	lincRNA	15	11964276	RIKEN cDNA 1700047G03 gene	1.80195	1.29756	1.26071	0.236024	0.813414	1
ENSMUSG00000029674	Limk1	protein_coding	5	134656039	LIM-domain containing, protein kinase	1332.02	1.29686	0.347089	0.855281	0.392396	1
ENSMUSG00000045075	Gm9796	lincRNA	11	95696894	predicted gene 9796	1.44435	1.29665	1.16956	0.253641	0.799773	1
ENSMUSG00000033850	Olfr1015	protein_coding	2	85782017	olfactory receptor 1015	3.88111	1.29663	0.730133	0.406263	0.68455	1
ENSMUSG00000025323	Sp4	protein_coding	12	118234933	trans-acting transcription factor 4	298.79	1.29659	0.234443	1.26506	0.205849	1
ENSMUSG00000033737	Fndc3c1	protein_coding	X	106420041	fibronectin type III domain containing 3C1	4.12661	1.29593	1.09451	0.270374	0.786872	1
ENSMUSG00000106987	Gm42575	lincRNA	5	74749882	predicted gene 42575	1.72444	1.29591	1.07616	0.274967	0.783342	1
ENSMUSG00000097682	4930554H23Rik	lincRNA	7	63344690	RIKEN cDNA 4930554H23 gene	1.52191	1.29456	1.18207	0.249193	0.803211	1
ENSMUSG00000063994	Olfr120	protein_coding	17	37721808	olfactory receptor 120	1.18456	1.29432	1.68763	0.174399	0.861552	1
ENSMUSG00000107677	Olfr316	protein_coding	11	58752734	olfactory receptor 316	1.25366	1.2928	1.071	0.273388	0.784555	1
ENSMUSG00000102252	Snrpn	protein_coding	7	59982495	small nuclear ribonucleoprotein N	45.7639	1.29121	0.376298	0.773878	0.439003	1
ENSMUSG00000040093	Bmf	protein_coding	2	118528757	BCL2 modifying factor	1936.29	1.29109	0.301454	0.965607	0.334241	1
ENSMUSG00000022090	Pdlim2	protein_coding	14	70164218	PDZ and LIM domain 2	2594.83	1.29074	0.34956	0.831741	0.405555	1
ENSMUSG00000093575	Gm20695	protein_coding	16	3884648	predicted gene 20695	10.1318	1.29009	1.33468	0.217347	0.827938	1
ENSMUSG00000091735	Gpr62	protein_coding	9	106463962	G protein-coupled receptor 62	2.45241	1.28909	1.22839	0.235342	0.813944	1
ENSMUSG00000024066	Xdh	protein_coding	17	73883908	xanthine dehydrogenase	3458.13	1.289	0.345595	0.83625	0.403014	1
ENSMUSG00000066705	Fxyd6	protein_coding	9	45370185	FXYD domain-containing ion transport regulator 6	80.4974	1.28883	0.370424	0.779738	0.435545	1
ENSMUSG00000104875	Gm43397	lincRNA	5	143334635	predicted gene 43397	0.673754	1.28863	2.03354	0.141936	0.88713	1
ENSMUSG00000103942	Gm34732	lincRNA	1	185082738	predicted gene, 34732	0.50696	1.28831	2.27299	0.12684	0.899067	1
ENSMUSG00000031431	Tsc22d3	protein_coding	X	140539528	TSC22 domain family, member 3	1630.36	1.28781	0.486851	0.591166	0.554409	1
ENSMUSG00000003378	Grik5	protein_coding	7	25009849	glutamate receptor, ionotropic, kainate 5 (gamma 2)	487.444	1.28719	0.259155	1.10816	0.267793	1
ENSMUSG00000086927	Gm11823	lincRNA	4	13919954	predicted gene 11823	0.378243	1.28705	3.4522	0.0831513	0.933731	1
ENSMUSG00000047678	Gpr82	protein_coding	X	13661363	G protein-coupled receptor 82	1.86658	1.28669	1.00979	0.28391	0.776479	1
ENSMUSG00000039661	Dusp26	protein_coding	8	31089471	dual specificity phosphatase 26 (putative)	4.20182	1.28649	0.876295	0.326939	0.743714	1
ENSMUSG00000109322	Olfr1283	protein_coding	2	111366790	olfactory receptor 1283	2.05421	1.28619	1.05406	0.271511	0.785998	1
ENSMUSG00000031559	4930555F03Rik	lincRNA	8	49370886	RIKEN cDNA 4930555F03 gene	5.58524	1.28549	0.93016	0.306928	0.758898	1
ENSMUSG00000079374	Gm8334	protein_coding	X	148613253	predicted gene 8334	0.43492	1.28528	2.75228	0.103653	0.917445	1
ENSMUSG00000054901	Arhgef33	protein_coding	17	80307407	Rho guanine nucleotide exchange factor (GEF) 33	9.99068	1.28489	0.774202	0.367984	0.712885	1
ENSMUSG00000079659	Tmem243	protein_coding	5	9100668	transmembrane protein 243, mitochondrial	4086.15	1.28419	0.329959	0.861302	0.389072	1
ENSMUSG00000007207	Stx1a	protein_coding	5	135023482	syntaxin 1A (brain)	26.5891	1.28417	0.444529	0.639268	0.522649	1
ENSMUSG00000090698	Apold1	protein_coding	6	134981718	apolipoprotein L domain containing 1	19.7718	1.28391	0.494298	0.574377	0.565713	1
ENSMUSG00000050473	Slc35d3	protein_coding	10	19847916	solute carrier family 35, member D3	8.04727	1.281	0.598977	0.469136	0.638973	1
ENSMUSG00000097370	4930467K11Rik	lincRNA	10	57478381	RIKEN cDNA 4930467K11 gene	0.890093	1.28017	1.54691	0.181119	0.856274	1
ENSMUSG00000037664	Cdkn1c	protein_coding	7	143458339	cyclin-dependent kinase inhibitor 1C (P57)	393.547	1.28007	0.381905	0.733362	0.463338	1
ENSMUSG00000036449	Lcn8	protein_coding	2	25653120	lipocalin 8	0.42523	1.27924	2.36651	0.117997	0.90607	1
ENSMUSG00000051054	1700014D04Rik	protein_coding	13	59740842	RIKEN cDNA 1700014D04 gene	4.34763	1.27843	0.971721	0.286535	0.774468	1
ENSMUSG00000041248	Kcnj1	protein_coding	9	32372493	potassium inwardly-rectifying channel, subfamily J, member 1	2.2934	1.27759	0.881199	0.315014	0.752751	1
ENSMUSG00000041548	Hspb8	protein_coding	5	116408491	heat shock protein 8	2108.46	1.27689	0.25471	1.08707	0.277007	1
ENSMUSG00000056738	A730036I17Rik	lincRNA	2	129218969	RIKEN cDNA A730036I17 gene	8.36319	1.27685	1.19777	0.23114	0.817206	1
ENSMUSG00000071235	Vrtn	protein_coding	12	84641019	vertebrae development associated	2.90452	1.27536	1.14745	0.239974	0.81035	1
ENSMUSG00000097286	Gm26684	lincRNA	15	54952948	predicted gene, 26684	1.57364	1.27413	1.24499	0.22019	0.825723	1
ENSMUSG00000022501	Prm1	protein_coding	16	10796326	protamine 1	0.591132	1.27359	2.00452	0.136484	0.891438	1
ENSMUSG00000030724	Cd19	protein_coding	7	126408450	CD19 antigen	20.2741	1.27336	0.817243	0.334492	0.738009	1
ENSMUSG00000109284	B230311B06Rik	lincRNA	7	118592328	RIKEN cDNA B230311B06 gene	3.24742	1.27333	0.876839	0.311722	0.755252	1
ENSMUSG00000020562	Efcab10	protein_coding	12	33394854	EF-hand calcium binding domain 10	0.955965	1.27325	2.19411	0.124538	0.90089	1
ENSMUSG00000037071	Scd1	protein_coding	19	44394451	stearoyl-Coenzyme A desaturase 1	95160	1.27303	0.300394	0.90891	0.363398	1
ENSMUSG00000074340	Ovgp1	protein_coding	3	105973711	oviductal glycoprotein 1	94.0799	1.27295	0.430064	0.634663	0.525648	1
ENSMUSG00000021719	Rgs7bp	protein_coding	13	104945904	regulator of G-protein signalling 7 binding protein	6.94761	1.27257	0.56366	0.483571	0.62869	1
ENSMUSG00000047146	Tet1	protein_coding	10	62804570	tet methylcytosine dioxygenase 1	53.3107	1.27229	0.602096	0.452242	0.651095	1
ENSMUSG00000097058	4930556M19Rik	lincRNA	15	10714836	RIKEN cDNA 4930556M19 gene	24.2014	1.27216	0.504545	0.539427	0.589593	1
ENSMUSG00000094719	Gm5108	protein_coding	5	67941669	predicted gene 5108	2.68504	1.27186	1.39329	0.195123	0.845297	1
ENSMUSG00000028978	Nos3	protein_coding	5	24364810	nitric oxide synthase 3, endothelial cell	11.6845	1.27074	0.456826	0.592655	0.553412	1
ENSMUSG00000031872	Bean1	protein_coding	8	104170442	brain expressed, associated with Nedd4, 1	65.3945	1.2701	0.449181	0.601307	0.547636	1
ENSMUSG00000098206	A430106G13Rik	lincRNA	1	137966531	RIKEN cDNA A430106G13 gene	2.57204	1.26957	0.990358	0.272199	0.785469	1
ENSMUSG00000040794	C1qtnf4	protein_coding	2	90885860	C1q and tumor necrosis factor related protein 4	45.1399	1.26949	0.337749	0.797885	0.424937	1
ENSMUSG00000031659	Adcy7	protein_coding	8	88272403	adenylate cyclase 7	3829.08	1.26891	0.30128	0.892562	0.372092	1
ENSMUSG00000042401	Crtac1	protein_coding	19	42283037	cartilage acidic protein 1	0.444153	1.26821	2.81573	0.0952531	0.924114	1
ENSMUSG00000053821	Gm9922	protein_coding	14	101729380	predicted gene 9922	1.59522	1.26762	1.29191	0.207152	0.835891	1
ENSMUSG00000074766	Ism1	protein_coding	2	139678178	isthmin 1, angiogenesis inhibitor	34.2136	1.26665	0.374494	0.712017	0.476454	1
ENSMUSG00000044243	Bhlha9	protein_coding	11	76672470	basic helix-loop-helix family, member a9	1.04137	1.26619	1.50956	0.176337	0.860029	1
ENSMUSG00000054986	Sec14l3	protein_coding	11	4064841	SEC14-like lipid binding 3	7942.87	1.26486	0.379748	0.697461	0.485514	1
ENSMUSG00000027505	Fam209	protein_coding	2	172472520	family with sequence similarity 209	5.25582	1.26436	0.709916	0.37238	0.70961	1
ENSMUSG00000005611	Mrvi1	protein_coding	7	110868266	MRV integration site 1	21.3687	1.26308	0.618597	0.425285	0.670629	1
ENSMUSG00000044938	Klhl31	protein_coding	9	77636500	kelch-like 31	4.3649	1.26306	0.790898	0.332605	0.739433	1
ENSMUSG00000097819	Gm26813	lincRNA	1	59488480	predicted gene, 26813	65.6731	1.26178	0.386999	0.676428	0.498769	1
ENSMUSG00000061718	Ppp1r1b	protein_coding	11	98348404	protein phosphatase 1, regulatory (inhibitor) subunit 1B	1149.4	1.26149	0.371864	0.703187	0.481939	1
ENSMUSG00000006567	Atp7b	protein_coding	8	21992785	ATPase, Cu++ transporting, beta polypeptide	3552.22	1.26116	0.467911	0.55814	0.576749	1
ENSMUSG00000085250	Gm15234	lincRNA	3	94658961	predicted gene 15234	9.8403	1.26068	0.465745	0.559709	0.575678	1
ENSMUSG00000001349	Cnn1	protein_coding	9	22099216	calponin 1	5.68197	1.25944	0.899785	0.288339	0.773087	1
ENSMUSG00000097961	Gm27000	lincRNA	X	88759471	predicted gene, 27000	1281.8	1.2591	0.595021	0.435454	0.663233	1
ENSMUSG00000035566	Pcdh17	protein_coding	14	84443563	protocadherin 17	26.716	1.25813	0.437883	0.589493	0.555531	1
ENSMUSG00000061195	Olfr1289	protein_coding	2	111480819	olfactory receptor 1289	20.2789	1.25606	0.725495	0.352946	0.724129	1
ENSMUSG00000000753	Serpinf1	protein_coding	11	75409769	serine (or cysteine) peptidase inhibitor, clade F, member 1	77.2792	1.25509	0.697156	0.365902	0.714438	1
ENSMUSG00000034336	Ina	protein_coding	19	47014698	internexin neuronal intermediate filament protein, alpha	5.06461	1.255	0.770561	0.330922	0.740704	1
ENSMUSG00000034706	Dnaic2	protein_coding	11	114727408	dynein, axonemal, intermediate chain 2	6.32851	1.2548	0.738536	0.345007	0.730089	1
ENSMUSG00000100717	1700120G07Rik	lincRNA	7	135191764	RIKEN cDNA 1700120G07 gene	1.31509	1.25455	1.40045	0.181764	0.855768	1
ENSMUSG00000113747	AC157278.1	lincRNA	12	90969949		1.15428	1.25438	1.56328	0.162724	0.870736	1
ENSMUSG00000074219	Gm10644	protein_coding	8	83932329	predicted gene 10644	36.6543	1.25438	0.487066	0.522263	0.601487	1
ENSMUSG00000049119	Fam110b	protein_coding	4	5644090	family with sequence similarity 110, member B	101.631	1.25402	0.338219	0.75106	0.452616	1
ENSMUSG00000049410	Zfp683	protein_coding	4	134053838	zinc finger protein 683	0.497723	1.25387	2.2717	0.111752	0.91102	1
ENSMUSG00000114774	AC154576.2	lincRNA	14	29786828		1.41211	1.2534	1.41533	0.179042	0.857905	1
ENSMUSG00000034161	Scx	protein_coding	15	76457438	scleraxis	230.354	1.25285	0.22264	1.13571	0.256078	1
ENSMUSG00000037130	H2-M10.6	protein_coding	17	36812171	histocompatibility 2, M region locus 10.6	0.474433	1.25021	2.06167	0.121364	0.903403	1
ENSMUSG00000113702	AC152827.3	lincRNA	12	110596608		0.482622	1.25016	2.07207	0.120729	0.903906	1
ENSMUSG00000050164	Mchr1	protein_coding	15	81235499	melanin-concentrating hormone receptor 1	2.85083	1.24896	1.11983	0.222317	0.824067	1
ENSMUSG00000043855	Olfr479	protein_coding	7	108050693	olfactory receptor 479	1.52639	1.24823	1.33739	0.185607	0.852753	1
ENSMUSG00000031179	3830417A13Rik	protein_coding	X	64173548	RIKEN cDNA 3830417A13 gene	0.819122	1.24752	2.15232	0.115002	0.908443	1
ENSMUSG00000070509	Rgma	protein_coding	7	73375509	repulsive guidance molecule family member A	155.489	1.24751	0.477163	0.518722	0.603955	1
ENSMUSG00000001493	Meox1	protein_coding	11	101877510	mesenchyme homeobox 1	4.87724	1.24638	0.775536	0.317686	0.750723	1
ENSMUSG00000090509	Sfta2	protein_coding	17	35601549	surfactant associated 2	5304.71	1.24573	0.236547	1.03881	0.298895	1
ENSMUSG00000036599	Chst12	protein_coding	5	140505550	carbohydrate sulfotransferase 12	490.159	1.24566	0.292651	0.839437	0.401224	1
ENSMUSG00000100154	Gm29052	lincRNA	17	83068905	predicted gene 29052	0.915026	1.24553	1.66168	0.147762	0.882531	1
ENSMUSG00000105638	4930408K08Rik	lincRNA	3	109078590	RIKEN cDNA 4930408K08 gene	2.06308	1.24527	1.02911	0.238333	0.811623	1
ENSMUSG00000032715	Trib3	protein_coding	2	152337422	tribbles pseudokinase 3	400.715	1.24475	0.246141	0.994335	0.32006	1
ENSMUSG00000109407	Gm34664	lincRNA	7	68843099	predicted gene, 34664	1.61384	1.24467	1.12604	0.21728	0.82799	1
ENSMUSG00000036196	Slc26a8	protein_coding	17	28637783	solute carrier family 26, member 8	14.7414	1.24431	0.487962	0.500667	0.616605	1
ENSMUSG00000051855	Mest	protein_coding	6	30723547	mesoderm specific transcript	30.4979	1.24345	0.354386	0.686962	0.492107	1
ENSMUSG00000042184	1700069L16Rik	protein_coding	5	113692422	RIKEN cDNA 1700069L16 gene	0.625013	1.24266	2.13316	0.113755	0.909432	1
ENSMUSG00000086632	1700112J05Rik	lincRNA	5	77006449	RIKEN cDNA 1700112J05 gene	0.76095	1.24219	1.69685	0.142727	0.886506	1
ENSMUSG00000106157	4930555A03Rik	lincRNA	3	151294126	RIKEN cDNA 4930555A03 gene	0.695205	1.24155	2.05997	0.117259	0.906655	1
ENSMUSG00000075599	Smok3a	protein_coding	5	138021261	sperm motility kinase 3A	2.80555	1.24143	1.14617	0.21064	0.833168	1
ENSMUSG00000052642	4930504O13Rik	protein_coding	11	58446149	RIKEN cDNA 4930504O13 gene	0.540082	1.24139	2.63043	0.0917667	0.926883	1
ENSMUSG00000060594	Layn	protein_coding	9	51054640	layilin	6.07414	1.24083	0.689881	0.349092	0.72702	1
ENSMUSG00000030137	Tuba8	protein_coding	6	121210696	tubulin, alpha 8	456.481	1.24067	0.378075	0.636555	0.524415	1
ENSMUSG00000016763	Scube1	protein_coding	15	83602583	signal peptide, CUB domain, EGF-like 1	23.8953	1.24059	0.442754	0.543394	0.586858	1
ENSMUSG00000020635	Fkbp1b	protein_coding	12	4833174	FK506 binding protein 1b	74.5516	1.23968	0.339079	0.706869	0.479648	1
ENSMUSG00000071005	Ccl19	protein_coding	4	42754525	chemokine (C-C motif) ligand 19	0.668658	1.23959	1.8446	0.129885	0.896658	1
ENSMUSG00000020932	Gfap	protein_coding	11	102887336	glial fibrillary acidic protein	6.58616	1.2395	0.854103	0.280406	0.779166	1
ENSMUSG00000026204	Ptprn	protein_coding	1	75247027	protein tyrosine phosphatase, receptor type, N	5435.05	1.23942	0.792009	0.30229	0.762431	1
ENSMUSG00000020642	Rnf144a	protein_coding	12	26300964	ring finger protein 144A	1211.7	1.23846	0.309121	0.771408	0.440465	1
ENSMUSG00000111034	AC153955.1	lincRNA	10	44647518		0.806701	1.23755	1.89527	0.12534	0.900254	1
ENSMUSG00000079058	Adam34	protein_coding	8	43650309	a disintegrin and metallopeptidase domain 34	0.520874	1.23753	1.86823	0.127142	0.898828	1
ENSMUSG00000041670	Rims1	protein_coding	1	22286251	regulating synaptic membrane exocytosis 1	49.5482	1.2373	0.513239	0.462356	0.643826	1
ENSMUSG00000066258	Trim12a	protein_coding	7	104299894	tripartite motif-containing 12A	116.741	1.23724	1.10697	0.214319	0.830298	1
ENSMUSG00000045761	Togaram2	protein_coding	17	71673261	TOG array regulator of axonemal microtubules 2	316.484	1.2372	0.280655	0.845149	0.398027	1
ENSMUSG00000051788	4930564D02Rik	protein_coding	3	105066844	RIKEN cDNA 4930564D02 gene	0.547069	1.23713	1.87724	0.126317	0.899481	1
ENSMUSG00000044250	Pced1b	protein_coding	15	97247107	PC-esterase domain containing 1B	121.462	1.23661	0.27477	0.861121	0.389171	1
ENSMUSG00000024366	Gfra3	protein_coding	18	34689903	glial cell line derived neurotrophic factor family receptor alpha 3	0.344476	1.23649	2.38494	0.0991585	0.921012	1
ENSMUSG00000085180	AI838599	lincRNA	4	3242055	expressed sequence AI838599	15.5729	1.23494	0.727024	0.323156	0.746577	1
ENSMUSG00000023336	Wfdc1	protein_coding	8	119666365	WAP four-disulfide core domain 1	231.833	1.23472	0.381135	0.615858	0.537988	1
ENSMUSG00000033510	Otud7a	protein_coding	7	63444751	OTU domain containing 7A	4.95976	1.23376	1.21628	0.192194	0.84759	1
ENSMUSG00000114439	AC159106.2	lincRNA	14	20215502		0.662642	1.23318	1.69605	0.137483	0.890649	1
[truncated: 21,716 more rows]

## Sheet: BP_C.vs.BP_TX
id	gene_name	biotype	chromosome	start	description	baseMean	log2FoldChange	lfcSE	stat	pvalue	padj
ENSMUSG00000030785	Cox6a2	protein_coding	7	128205435	cytochrome c oxidase subunit VIa polypeptide 2	529.097	-8.41615	0.454085	-16.332	5.83902e-60	6.07258e-57
ENSMUSG00000024268	Celf4	protein_coding	18	25477632	CUGBP, Elav-like family member 4	1120.07	4.34523	0.20893	16.0113	1.06609e-57	1.04015e-54
ENSMUSG00000045027	Prss22	protein_coding	17	23993535	protease, serine 22	1845.61	6.98915	0.523263	11.4458	2.46929e-30	8.95379e-28
ENSMUSG00000026278	Bok	protein_coding	1	93685660	BCL2-related ovarian killer	984.742	3.45834	0.216247	11.3682	6.02066e-30	2.15831e-27
ENSMUSG00000037263	Aldh3b3	protein_coding	19	3958645	aldehyde dehydrogenase 3 family, member B3	90.3088	4.57311	0.315004	11.3431	8.02769e-30	2.83485e-27
ENSMUSG00000037254	Itih2	protein_coding	2	10094593	inter-alpha trypsin inhibitor, heavy chain 2	6592.31	3.99056	0.277042	10.7946	3.65021e-27	1.15152e-24
ENSMUSG00000031098	Syt8	protein_coding	7	142434850	synaptotagmin VIII	2086	4.74133	0.379316	9.86335	6.00123e-23	1.56894e-20
ENSMUSG00000032083	Apoa1	protein_coding	9	46228580	apolipoprotein A-I	970.114	7.61837	0.679552	9.73932	2.0493e-22	5.21359e-20
ENSMUSG00000017950	Hnf4a	protein_coding	2	163506808	hepatic nuclear factor 4, alpha	5294.98	4.53661	0.364923	9.69138	3.28064e-22	8.21374e-20
ENSMUSG00000038296	Galnt18	protein_coding	7	111471661	UDP-N-acetyl-alpha-D-galactosamine:polypeptide N-acetylgalactosaminyltransferase 18	686.605	-3.7056	0.284148	-9.5218	1.70212e-21	4.08855e-19
ENSMUSG00000015533	Itga2	protein_coding	13	114833081	integrin alpha 2	3844.33	3.77485	0.291623	9.51521	1.81341e-21	4.32295e-19
ENSMUSG00000035930	Chst4	protein_coding	8	110029153	carbohydrate (chondroitin 6/keratan) sulfotransferase 4	534.853	5.9384	0.520395	9.48971	2.31677e-21	5.46781e-19
ENSMUSG00000032254	Kif23	protein_coding	9	61915905	kinesin family member 23	1761.27	3.00578	0.235162	8.52938	1.47132e-17	2.96898e-15
ENSMUSG00000091387	Gcnt4	protein_coding	13	96924689	glucosaminyl (N-acetyl) transferase 4, core 2 (beta-1,6-N-acetylglucosaminyltransferase)	978.326	3.72242	0.320791	8.48659	2.12794e-17	4.23084e-15
ENSMUSG00000020019	Ntn4	protein_coding	10	93640681	netrin 4	812.428	-2.72656	0.208565	-8.27828	1.24963e-16	2.38918e-14
ENSMUSG00000055978	Fut2	protein_coding	7	45648591	fucosyltransferase 2	1404.43	2.30615	0.161969	8.06418	7.37318e-16	1.32914e-13
ENSMUSG00000003418	St8sia6	protein_coding	2	13651021	ST8 alpha-N-acetyl-neuraminide alpha-2,8-sialyltransferase 6	6124.07	2.76361	0.223887	7.87722	3.34732e-15	5.79142e-13
ENSMUSG00000030049	Gkn2	protein_coding	6	87373357	gastrokine 2	22243.2	5.1328	0.531857	7.77051	7.81719e-15	1.30479e-12
ENSMUSG00000009900	Wnt3a	protein_coding	11	59248033	wingless-type MMTV integration site family, member 3A	44.088	-4.80867	0.499514	-7.62475	2.44506e-14	3.93538e-12
ENSMUSG00000061718	Ppp1r1b	protein_coding	11	98348404	protein phosphatase 1, regulatory (inhibitor) subunit 1B	1149.4	-4.02428	0.397465	-7.60891	2.76412e-14	4.41886e-12
ENSMUSG00000042988	Notum	protein_coding	11	120653788	notum pectinacetylesterase homolog (Drosophila)	119.587	-4.30326	0.438125	-7.53954	4.71646e-14	7.40242e-12
ENSMUSG00000022181	C6	protein_coding	15	4727175	complement component 6	500.083	-4.82642	0.511997	-7.47353	7.80728e-14	1.20732e-11
ENSMUSG00000021208	Ifi27l2b	protein_coding	12	103450898	interferon, alpha-inducible protein 27 like 2B	909.23	5.45009	0.606124	7.34189	2.10594e-13	3.13868e-11
ENSMUSG00000058297	Spock2	protein_coding	10	60106219	sparc/osteonectin, cwcv and kazal-like domains proteoglycan 2	343.374	-3.81632	0.387918	-7.26009	3.8683e-13	5.66712e-11
ENSMUSG00000017724	Etv4	protein_coding	11	101769742	ets variant 4	1165.05	3.36379	0.327601	7.21545	5.3755e-13	7.79077e-11
ENSMUSG00000046623	Gjb4	protein_coding	4	127351086	gap junction protein, beta 4	1527.84	3.85683	0.398489	7.16916	7.54606e-13	1.08042e-10
ENSMUSG00000024640	Psat1	protein_coding	19	15904678	phosphoserine aminotransferase 1	1995.87	2.41672	0.197907	7.15854	8.1538e-13	1.16216e-10
ENSMUSG00000028469	Npr2	protein_coding	4	43631935	natriuretic peptide receptor 2	788.057	-3.41971	0.34272	-7.06031	1.66135e-12	2.31221e-10
ENSMUSG00000040808	S100g	protein_coding	X	162961992	S100 calcium binding protein G	1197.25	-2.93736	0.279657	-6.92764	4.27931e-12	5.81053e-10
ENSMUSG00000021556	Golm1	protein_coding	13	59634626	golgi membrane protein 1	24372.4	2.26056	0.184517	6.83171	8.39094e-12	1.11221e-09
ENSMUSG00000028339	Col15a1	protein_coding	4	47208161	collagen, type XV, alpha 1	3954.97	6.039	0.740463	6.8052	1.00909e-11	1.3264e-09
ENSMUSG00000030587	2200002D01Rik	protein_coding	7	29246561	RIKEN cDNA 2200002D01 gene	1875.39	2.37204	0.202658	6.77022	1.28588e-11	1.67164e-09
ENSMUSG00000022180	Slc7a8	protein_coding	14	54722216	solute carrier family 7 (cationic amino acid transporter, y+ system), member 8	147.565	-3.52799	0.382314	-6.61235	3.78274e-11	4.77332e-09
ENSMUSG00000034634	Ly6d	protein_coding	15	74762056	lymphocyte antigen 6 complex, locus D	9491.24	3.99001	0.461718	6.47583	9.42907e-11	1.147e-08
ENSMUSG00000049128	Ivl	protein_coding	3	92570902	involucrin	1416.35	4.61625	0.56018	6.45551	1.07858e-10	1.30366e-08
ENSMUSG00000001025	S100a6	protein_coding	3	90612882	S100 calcium binding protein A6 (calcyclin)	35945.2	3.66123	0.415018	6.41231	1.43328e-10	1.70409e-08
ENSMUSG00000026479	Lamc2	protein_coding	1	153122756	laminin, gamma 2	31793.4	2.25524	0.195889	6.40789	1.47543e-10	1.752e-08
ENSMUSG00000031872	Bean1	protein_coding	8	104170442	brain expressed, associated with Nedd4, 1	65.3945	4.73158	0.59371	6.28519	3.27462e-10	3.67628e-08
ENSMUSG00000046719	Nxph3	protein_coding	11	95509845	neurexophilin 3	24.5249	-4.8038	0.608878	-6.24722	4.1781e-10	4.61934e-08
ENSMUSG00000062778	Chia1	protein_coding	3	106113229	chitinase, acidic 1	6218.01	-4.43774	0.552705	-6.21983	4.9768e-10	5.45776e-08
ENSMUSG00000006235	Epor	protein_coding	9	21958897	erythropoietin receptor	105.981	4.26962	0.526422	6.21102	5.26424e-10	5.75963e-08
ENSMUSG00000074625	Arhgap40	protein_coding	2	158512796	Rho GTPase activating protein 40	1125.61	3.93004	0.471885	6.20923	5.32433e-10	5.81194e-08
ENSMUSG00000025402	Nab2	protein_coding	10	127660918	Ngfi-A binding protein 2	3966.77	2.23594	0.200416	6.16689	6.9645e-10	7.50707e-08
ENSMUSG00000039954	Stk32a	protein_coding	18	43207697	serine/threonine kinase 32A	175.798	3.31788	0.377764	6.13578	8.47417e-10	9.04166e-08
ENSMUSG00000079436	Kcnj13	protein_coding	1	87386363	potassium inwardly-rectifying channel, subfamily J, member 13	257.376	-3.98476	0.489259	-6.10058	1.05683e-09	1.11503e-07
ENSMUSG00000025790	Slco3a1	protein_coding	7	74275419	solute carrier organic anion transporter family, member 3a1	1412.71	-2.34915	0.221427	-6.09296	1.10843e-09	1.16428e-07
ENSMUSG00000004892	Bcan	protein_coding	3	87987531	brevican	66.2888	-5.15953	0.687756	-6.04797	1.46682e-09	1.51715e-07
ENSMUSG00000025017	Pik3ap1	protein_coding	19	41274218	phosphoinositide-3-kinase adaptor protein 1	1566.42	-3.07203	0.343406	-6.03376	1.60187e-09	1.64784e-07
ENSMUSG00000056124	B4galt6	protein_coding	18	20684599	UDP-Gal:betaGlcNAc beta 1,4-galactosyltransferase, polypeptide 6	1982.11	2.89143	0.315224	6.00027	1.96987e-09	2.004e-07
ENSMUSG00000022156	Gzme	protein_coding	14	56117626	granzyme E	147.437	6.5429	0.926438	5.98302	2.19034e-09	2.20526e-07
ENSMUSG00000024256	Adcyap1	protein_coding	17	93199422	adenylate cyclase activating polypeptide 1	139.99	3.38063	0.399716	5.9558	2.58797e-09	2.59181e-07
ENSMUSG00000026874	Hc	protein_coding	2	34983331	hemolytic complement	12979.6	-4.37725	0.571423	-5.91025	3.41598e-09	3.39946e-07
ENSMUSG00000021301	Hecw1	protein_coding	13	14226438	HECT, C2 and WW domain containing E3 ubiquitin protein ligase 1	595.606	3.8504	0.484906	5.87825	4.14635e-09	4.07911e-07
ENSMUSG00000024032	Tff1	protein_coding	17	31161396	trefoil factor 1	38018.6	3.45411	0.418471	5.86447	4.50579e-09	4.40524e-07
ENSMUSG00000028108	Ecm1	protein_coding	3	95734147	extracellular matrix protein 1	1627.98	3.08893	0.356341	5.86218	4.56817e-09	4.45456e-07
ENSMUSG00000020681	Ace	protein_coding	11	105967945	angiotensin I converting enzyme (peptidyl-dipeptidase A) 1	2251.79	2.15709	0.198559	5.82744	5.62842e-09	5.42543e-07
ENSMUSG00000026205	Slc23a3	protein_coding	1	75125541	solute carrier family 23 (nucleobase transporters), member 3	867.728	2.69405	0.291734	5.80686	6.36562e-09	6.09759e-07
ENSMUSG00000034266	Batf	protein_coding	12	85686669	basic leucine zipper transcription factor, ATF-like	48.6685	-2.61075	0.27758	-5.80284	6.52014e-09	6.23299e-07
ENSMUSG00000021922	Itih4	protein_coding	14	30886492	inter alpha-trypsin inhibitor, heavy chain 4	2142.67	-3.79961	0.485671	-5.76442	8.19382e-09	7.75463e-07
ENSMUSG00000041132	N4bp2l1	protein_coding	5	150571644	NEDD4 binding protein 2-like 1	425.963	-2.24951	0.220722	-5.661	1.50496e-08	1.37481e-06
ENSMUSG00000019194	Scn1b	protein_coding	7	31116524	sodium channel, voltage-gated, type I, beta	414.897	2.44876	0.256984	5.63756	1.72472e-08	1.57403e-06
ENSMUSG00000019960	Dusp6	protein_coding	10	99263231	dual specificity phosphatase 6	11032	2.36144	0.242824	5.60668	2.0625e-08	1.86255e-06
ENSMUSG00000040412	5330417C22Rik	protein_coding	3	108455694	RIKEN cDNA 5330417C22 gene	4068.22	-2.65761	0.297066	-5.57995	2.40586e-08	2.15005e-06
ENSMUSG00000032643	Fhl3	protein_coding	4	124700701	four and a half LIM domains 3	196.752	2.96041	0.353405	5.5472	2.90276e-08	2.57226e-06
ENSMUSG00000037440	Vnn1	protein_coding	10	23894688	vanin 1	4429.39	-2.49371	0.270895	-5.51399	3.50791e-08	3.08253e-06
ENSMUSG00000037613	Tnfrsf23	protein_coding	7	143665809	tumor necrosis factor receptor superfamily, member 23	693.005	3.23868	0.406026	5.51363	3.5151e-08	3.08599e-06
ENSMUSG00000059900	Tmem40	protein_coding	6	115729131	transmembrane protein 40	147.941	3.80254	0.510269	5.49228	3.96779e-08	3.44823e-06
ENSMUSG00000003227	Edar	protein_coding	10	58600789	ectodysplasin-A receptor	42.4377	-3.3234	0.424646	-5.47138	4.46555e-08	3.85602e-06
ENSMUSG00000036964	Trim17	protein_coding	11	58954685	tripartite motif-containing 17	33.0339	-3.20552	0.406095	-5.43103	5.60307e-08	4.78156e-06
ENSMUSG00000035683	Melk	protein_coding	4	44300876	maternal embryonic leucine zipper kinase	190.327	4.41644	0.630151	5.42162	5.90605e-08	5.01749e-06
ENSMUSG00000029377	Ereg	protein_coding	5	91074622	epiregulin	5926.93	3.45333	0.456113	5.37879	7.49872e-08	6.32512e-06
ENSMUSG00000022602	Arc	protein_coding	15	74669083	activity regulated cytoskeletal-associated protein	3307.14	3.62581	0.490023	5.35854	8.38963e-08	7.0265e-06
ENSMUSG00000050860	Phospho1	protein_coding	11	95824499	phosphatase, orphan 1	150.347	-2.79712	0.3358	-5.35177	8.71001e-08	7.28194e-06
ENSMUSG00000038539	Atf5	protein_coding	7	44812256	activating transcription factor 5	2601.97	-2.26366	0.236826	-5.33579	9.51275e-08	7.91809e-06
ENSMUSG00000031654	Cbln1	protein_coding	8	87468405	cerebellin 1 precursor protein	45.4628	5.05656	0.76136	5.32804	9.92794e-08	8.21312e-06
ENSMUSG00000028435	Aqp3	protein_coding	4	41092722	aquaporin 3	279.894	3.7256	0.512415	5.31912	1.0427e-07	8.57352e-06
ENSMUSG00000022033	Pbk	protein_coding	14	65805837	PDZ binding kinase	195.116	4.36146	0.632903	5.31117	1.08921e-07	8.93264e-06
ENSMUSG00000030513	Pcsk6	protein_coding	7	65861734	proprotein convertase subtilisin/kexin type 6	6191.45	2.1785	0.223381	5.27572	1.32233e-07	1.07329e-05
ENSMUSG00000024989	Cep55	protein_coding	19	38055025	centrosomal protein 55	232.066	3.99266	0.571388	5.23752	1.62746e-07	1.3086e-05
ENSMUSG00000030867	Plk1	protein_coding	7	122159439	polo-like kinase 1	762.018	3.20963	0.422725	5.2271	1.72186e-07	1.38216e-05
ENSMUSG00000001403	Ube2c	protein_coding	2	164769898	ubiquitin-conjugating enzyme E2C	381.525	4.35803	0.646545	5.1938	2.06039e-07	1.64138e-05
ENSMUSG00000001228	Uhrf1	protein_coding	17	56303321	ubiquitin-like, containing PHD and RING finger domains, 1	569.258	3.92107	0.567465	5.14757	2.63877e-07	2.07075e-05
ENSMUSG00000036814	Slc6a20a	protein_coding	9	123634770	solute carrier family 6 (neurotransmitter transporter), member 20A	434.99	-2.75131	0.341847	-5.1231	3.00552e-07	2.34495e-05
ENSMUSG00000108393	Gm32633	lincRNA	7	64001885	predicted gene, 32633	24.1544	-3.26654	0.443584	-5.10961	3.22823e-07	2.50837e-05
ENSMUSG00000033530	Ttc7b	protein_coding	12	100300770	tetratricopeptide repeat domain 7B	145.584	-2.34068	0.264605	-5.06673	4.04699e-07	3.09626e-05
ENSMUSG00000030544	Mesp1	protein_coding	7	79792241	mesoderm posterior 1	26.9904	-3.29446	0.452942	-5.06569	4.06923e-07	3.11076e-05
ENSMUSG00000032226	Gcnt3	protein_coding	9	70031496	glucosaminyl (N-acetyl) transferase 3, mucin type	2607.84	3.89052	0.572026	5.05314	4.34609e-07	3.30639e-05
ENSMUSG00000040990	Sh3kbp1	protein_coding	X	159627272	SH3-domain kinase binding protein 1	445.761	-2.39191	0.278276	-5.00189	5.67723e-07	4.26423e-05
ENSMUSG00000028011	Tdo2	protein_coding	3	81957090	tryptophan 2,3-dioxygenase	46.2247	4.12049	0.625583	4.98813	6.09674e-07	4.56123e-05
ENSMUSG00000047230	Cldn2	protein_coding	X	139800828	claudin 2	5855.66	2.72559	0.345966	4.98773	6.10918e-07	4.56693e-05
ENSMUSG00000048776	Pthlh	protein_coding	6	147252101	parathyroid hormone-like peptide	256.128	4.00427	0.602835	4.98356	6.2424e-07	4.64974e-05
ENSMUSG00000070305	Mpzl3	protein_coding	9	45055186	myelin protein zero-like 3	1177.76	2.08262	0.217993	4.96628	6.82491e-07	5.05011e-05
ENSMUSG00000015134	Aldh1a3	protein_coding	7	66390890	aldehyde dehydrogenase family 1, subfamily A3	323.95	3.21951	0.447579	4.95892	7.08875e-07	5.23307e-05
ENSMUSG00000037846	Rtkn2	protein_coding	10	67979570	rhotekin 2	826.181	-3.41203	0.488804	-4.93455	8.03351e-07	5.87097e-05
ENSMUSG00000043496	Tril	protein_coding	6	53815468	TLR4 interactor with leucine-rich repeats	27.3756	-4.04354	0.618263	-4.92273	8.53464e-07	6.22279e-05
ENSMUSG00000023505	Cdca3	protein_coding	6	124829547	cell division cycle associated 3	377.885	3.91548	0.596178	4.89029	1.00688e-06	7.26856e-05
ENSMUSG00000044933	Sstr3	protein_coding	15	78537015	somatostatin receptor 3	32.7241	4.71211	0.762411	4.8689	1.1222e-06	8.07031e-05
ENSMUSG00000021262	Evl	protein_coding	12	108554720	Ena-vasodilator stimulated phosphoprotein	803.135	-2.61302	0.331416	-4.86705	1.13277e-06	8.14014e-05
ENSMUSG00000034265	Zdhhc14	protein_coding	17	5492600	zinc finger, DHHC domain containing 14	24.4389	-2.90072	0.391173	-4.85904	1.17958e-06	8.45085e-05
ENSMUSG00000019942	Cdk1	protein_coding	10	69335146	cyclin-dependent kinase 1	753.822	4.01355	0.620458	4.85698	1.1919e-06	8.51972e-05
ENSMUSG00000026204	Ptprn	protein_coding	1	75247027	protein tyrosine phosphatase, receptor type, N	5435.05	5.1859	0.862935	4.85077	1.22985e-06	8.77117e-05
ENSMUSG00000066071	Cyp4a12a	protein_coding	4	115299046	cytochrome P450, family 4, subfamily a, polypeptide 12a	7.99676	-6.28746	1.09286	-4.83819	1.31024e-06	9.28156e-05
ENSMUSG00000027715	Ccna2	protein_coding	3	36564865	cyclin A2	483.964	3.93087	0.60756	4.824	1.4071e-06	9.93051e-05
ENSMUSG00000002997	Prkar2b	protein_coding	12	31958476	protein kinase, cAMP dependent regulatory, type II beta	238.499	-2.35859	0.28224	-4.8136	1.48239e-06	0.000104385
ENSMUSG00000031004	Mki67	protein_coding	7	135689784	antigen identified by monoclonal antibody Ki 67	2644.04	3.7781	0.578041	4.80606	1.53932e-06	0.000108313
ENSMUSG00000054161	Fam83e	protein_coding	7	45721212	family with sequence similarity 83, member E	2418.27	2.07303	0.223543	4.80012	1.5857e-06	0.000111494
ENSMUSG00000040061	Plcb2	protein_coding	2	118707517	phospholipase C, beta 2	129.854	-2.2845	0.267857	-4.79549	1.62279e-06	0.000113595
ENSMUSG00000026497	Mixl1	protein_coding	1	180693043	Mix1 homeobox-like 1 (Xenopus laevis)	77.8867	3.61558	0.546473	4.78629	1.69892e-06	0.000118574
ENSMUSG00000070348	Ccnd1	protein_coding	7	144929931	cyclin D1	15025.5	2.03816	0.216951	4.78524	1.70787e-06	0.000119111
ENSMUSG00000025175	Fn3k	protein_coding	11	121434913	fructosamine 3 kinase	48.7762	-2.57055	0.328436	-4.78189	1.73652e-06	0.00012102
ENSMUSG00000079429	Mroh2a	protein_coding	1	88226986	maestro heat-like repeat family member 2A	138.502	2.98228	0.414844	4.77837	1.76718e-06	0.000122975
ENSMUSG00000022034	Esco2	protein_coding	14	65819038	establishment of sister chromatid cohesion N-acetyltransferase 2	141.659	3.96943	0.623026	4.76614	1.87793e-06	0.000130108
ENSMUSG00000049422	Chchd10	protein_coding	10	75933130	coiled-coil-helix-coiled-coil-helix domain containing 10	1940.29	-1.87523	0.184572	-4.74192	2.11707e-06	0.000145928
ENSMUSG00000032218	Ccnb2	protein_coding	9	70407692	cyclin B2	334.933	3.90861	0.617268	4.71206	2.45222e-06	0.000167808
ENSMUSG00000025001	Hells	protein_coding	19	38930915	helicase, lymphoid specific	263.738	2.95872	0.41625	4.70563	2.53085e-06	0.000172728
ENSMUSG00000108793	Gm45213	protein_coding	7	66043602	predicted gene 45213	156.173	1.8529	0.181955	4.68742	2.76676e-06	0.000187704
ENSMUSG00000029718	Pcolce	protein_coding	5	137605103	procollagen C-endopeptidase enhancer protein	2387.06	2.34912	0.288532	4.6758	2.92803e-06	0.000197652
ENSMUSG00000031635	Anxa10	protein_coding	8	62057042	annexin A10	4796.34	3.86469	0.613821	4.66697	3.05667e-06	0.000205749
ENSMUSG00000053137	Mapk11	protein_coding	15	89142486	mitogen-activated protein kinase 11	677.001	2.44757	0.311109	4.65292	3.27267e-06	0.000218887
ENSMUSG00000058571	Gpc6	protein_coding	14	116925297	glypican 6	762.798	2.97327	0.425293	4.63978	3.48777e-06	0.000232289
ENSMUSG00000042179	Pnliprp1	protein_coding	19	58728887	pancreatic lipase related protein 1	13.7669	-4.4952	0.754178	-4.63445	3.57881e-06	0.00023785
ENSMUSG00000023886	Smoc2	protein_coding	17	14279506	SPARC related modular calcium binding 2	64.8773	-4.23032	0.6971	-4.63394	3.58766e-06	0.000238271
ENSMUSG00000087028	Gm13387	lincRNA	2	25122603	predicted gene 13387	47.9254	4.37585	0.73033	4.62236	3.79401e-06	0.000250569
ENSMUSG00000002769	Gnmt	protein_coding	17	46725664	glycine N-methyltransferase	109.253	-2.20901	0.262284	-4.60953	4.03578e-06	0.000264872
ENSMUSG00000020808	Pimreg	protein_coding	11	72042032	PICALM interacting mitotic regulator	86.3227	3.78199	0.605509	4.59447	4.3386e-06	0.000283763
ENSMUSG00000027331	Knstrn	protein_coding	2	118814003	kinetochore-localized astrin/SPAG5 binding	420.711	3.50874	0.547829	4.57942	4.66262e-06	0.000303487
ENSMUSG00000050359	Sprr1a	protein_coding	3	92483952	small proline-rich protein 1A	1493.75	2.80502	0.395578	4.563	5.04282e-06	0.000326383
ENSMUSG00000031775	Pllp	protein_coding	8	94674894	plasma membrane proteolipid	3587.81	2.63307	0.358019	4.56139	5.08163e-06	0.000328501
ENSMUSG00000064294	Aox3	protein_coding	1	58113130	aldehyde oxidase 3	10157.8	-3.10104	0.460879	-4.55876	5.14565e-06	0.000332413
ENSMUSG00000017716	Birc5	protein_coding	11	117849251	baculoviral IAP repeat-containing 5	320.576	3.93862	0.648559	4.531	5.8706e-06	0.000375401
ENSMUSG00000012443	Kif11	protein_coding	19	37376403	kinesin family member 11	463	3.73166	0.603058	4.52968	5.90728e-06	0.000376983
ENSMUSG00000020911	Krt19	protein_coding	11	100140810	keratin 19	26709.3	2.40397	0.310249	4.5253	6.03094e-06	0.000384355
ENSMUSG00000037544	Dlgap5	protein_coding	14	47387779	discs, large (Drosophila) homolog-associated protein 5	213.987	4.04182	0.672749	4.52148	6.14076e-06	0.000390828
ENSMUSG00000091089	A930018M24Rik	protein_coding	14	50895942	RIKEN cDNA A930018M24 gene	7.92931	-4.54672	0.785491	-4.51529	6.32311e-06	0.000401354
ENSMUSG00000078597	Cyp4a12b	protein_coding	4	115411624	cytochrome P450, family 4, subfamily a, polypeptide 12B	7.85068	-4.3725	0.750644	-4.4928	7.0292e-06	0.000443495
ENSMUSG00000022157	Mcpt8	protein_coding	14	56082166	mast cell protease 8	30.6691	6.34794	1.19376	4.47989	7.46802e-06	0.000468993
ENSMUSG00000023039	Krt7	protein_coding	15	101411043	keratin 7	41896.9	2.55025	0.3493	4.43817	9.07284e-06	0.000562683
ENSMUSG00000038572	Bpifb5	protein_coding	2	154223742	BPI fold containing family B, member 5	28.2784	-3.84251	0.643891	-4.41458	1.01207e-05	0.000621962
ENSMUSG00000000308	Ckmt1	protein_coding	2	121357714	creatine kinase, mitochondrial 1, ubiquitous	8225.92	2.10702	0.251194	4.40705	1.04788e-05	0.000642716
ENSMUSG00000028358	Zfp618	protein_coding	4	62965573	zinc finger protein 618	1107.83	4.50035	0.795122	4.40228	1.07119e-05	0.00065574
ENSMUSG00000021749	Oit1	protein_coding	14	8348937	oncoprotein induced transcript 1	2670.33	2.74681	0.398756	4.38066	1.18322e-05	0.000721055
ENSMUSG00000049409	Prokr1	protein_coding	6	87578591	prokineticin receptor 1	244.07	1.82114	0.187822	4.37189	1.23175e-05	0.000748703
ENSMUSG00000034353	Ramp1	protein_coding	1	91179822	receptor (calcitonin) activity modifying protein 1	354.855	-2.44121	0.330014	-4.36712	1.25894e-05	0.000764244
ENSMUSG00000010651	Acaa1b	protein_coding	9	119148023	acetyl-Coenzyme A acyltransferase 1B	68.5695	-3.16371	0.496796	-4.35534	1.3286e-05	0.000803956
ENSMUSG00000036777	Anln	protein_coding	9	22332012	anillin, actin binding protein	548.31	3.10488	0.483322	4.35502	1.33053e-05	0.000804468
ENSMUSG00000022037	Clu	protein_coding	14	65968483	clusterin	522117	2.48765	0.341634	4.35451	1.33362e-05	0.000804936
ENSMUSG00000028328	Tmod1	protein_coding	4	46038935	tropomodulin 1	197.335	-2.74858	0.402117	-4.34845	1.37101e-05	0.000825399
ENSMUSG00000038943	Prc1	protein_coding	7	80294450	protein regulator of cytokinesis 1	720.894	3.47531	0.569999	4.34266	1.40768e-05	0.000846399
ENSMUSG00000027469	Tpx2	protein_coding	2	152847964	TPX2, microtubule-associated	462.999	3.51477	0.580008	4.33574	1.45268e-05	0.000871791
ENSMUSG00000032783	Troap	protein_coding	15	99074973	trophinin associated protein	73.5023	3.68958	0.621856	4.32508	1.52478e-05	0.00090987
ENSMUSG00000013523	Bcas1	protein_coding	2	170346991	breast carcinoma amplified sequence 1	2848.4	2.72682	0.399573	4.32167	1.54856e-05	0.000921732
ENSMUSG00000048327	Ckap2l	protein_coding	2	129268210	cytoskeleton associated protein 2-like	223.401	3.52573	0.584536	4.32091	1.55387e-05	0.000923152
ENSMUSG00000054422	Fabp1	protein_coding	6	71199827	fatty acid binding protein 1, liver	48.043	-4.48523	0.816486	-4.26857	1.96729e-05	0.00114364
ENSMUSG00000072601	Ear1	protein_coding	14	43818765	eosinophil-associated, ribonuclease A family, member 1	234.247	-3.91903	0.68434	-4.26547	1.99486e-05	0.00115682
ENSMUSG00000078949	R3hdml	protein_coding	2	163492318	R3H domain containing-like	87.8322	2.82343	0.428457	4.25581	2.08294e-05	0.00120274
ENSMUSG00000025150	Cbr2	protein_coding	11	120729489	carbonyl reductase 2	14694.5	-4.21237	0.757974	-4.2381	2.25417e-05	0.00129372
ENSMUSG00000028713	Cyp4b1	protein_coding	4	115624725	cytochrome P450, family 4, subfamily b, polypeptide 1	1554.99	-3.36341	0.558407	-4.23242	2.31188e-05	0.00132406
ENSMUSG00000072596	Ear2	protein_coding	14	44102654	eosinophil-associated, ribonuclease A family, member 2	861.807	-3.55048	0.603086	-4.22904	2.34686e-05	0.00134285
ENSMUSG00000045328	Cenpe	protein_coding	3	135212537	centromere protein E	354.958	3.41104	0.570834	4.22371	2.40314e-05	0.00137422
ENSMUSG00000027306	Nusap1	protein_coding	2	119618298	nucleolar and spindle associated protein 1	307.838	3.89931	0.687997	4.21414	2.50735e-05	0.00142777
ENSMUSG00000046223	Plaur	protein_coding	7	24462484	plasminogen activator, urokinase receptor	6513.61	2.27509	0.302954	4.20886	2.56658e-05	0.00145974
ENSMUSG00000073940	Hbb-bt	protein_coding	7	103812524	hemoglobin, beta adult t chain	24.3183	-3.36644	0.564181	-4.19446	2.73521e-05	0.00154636
ENSMUSG00000023905	Tnfrsf12a	protein_coding	17	23675447	tumor necrosis factor receptor superfamily, member 12a	4751.93	2.15788	0.277673	4.16994	3.04674e-05	0.00170719
ENSMUSG00000025401	Myo1a	protein_coding	10	127705170	myosin IA	1445.94	3.09821	0.506003	4.14664	3.37383e-05	0.00187823
ENSMUSG00000013766	Ly6g6e	protein_coding	17	35076902	lymphocyte antigen 6 complex, locus G6E	250.628	1.73156	0.176456	4.14584	3.38571e-05	0.00188229
ENSMUSG00000038801	Scgb1c1	protein_coding	7	140845547	secretoglobin, family 1C, member 1	107.495	-2.54398	0.372454	-4.14543	3.39183e-05	0.00188382
ENSMUSG00000044469	Tnfaip8l1	protein_coding	17	56162477	tumor necrosis factor, alpha-induced protein 8-like 1	350.079	1.62506	0.150841	4.14381	3.4159e-05	0.00189496
ENSMUSG00000092586	Ly6g6c	protein_coding	17	35065388	lymphocyte antigen 6 complex, locus G6C	238.372	2.71986	0.415035	4.14389	3.41458e-05	0.00189496
ENSMUSG00000027875	Hmgcs2	protein_coding	3	98280435	3-hydroxy-3-methylglutaryl-Coenzyme A synthase 2	2677.65	-4.81595	0.921586	-4.14063	3.46352e-05	0.00191913
ENSMUSG00000043430	Psapl1	protein_coding	5	36204021	prosaposin-like 1	169.882	2.94425	0.469604	4.1402	3.47002e-05	0.00192161
ENSMUSG00000068101	Cenpm	protein_coding	15	82233779	centromere protein M	48.0586	3.90769	0.703368	4.13395	3.56578e-05	0.00196544
ENSMUSG00000035878	Hykk	protein_coding	9	54917283	hydroxylysine kinase 1	133.77	-1.8333	0.201709	-4.13122	3.60846e-05	0.00198665
ENSMUSG00000020010	Vnn3	protein_coding	10	23851462	vanin 3	260.296	-2.55228	0.375761	-4.13103	3.61142e-05	0.00198712
ENSMUSG00000006369	Fbln1	protein_coding	15	85205949	fibulin 1	82.8921	-2.7702	0.429194	-4.12447	3.71582e-05	0.00203746
ENSMUSG00000098318	Lockd	lincRNA	6	134929092	lncRNA downstream of Cdkn1b	55.6862	3.65333	0.64401	4.12001	3.78857e-05	0.00207015
ENSMUSG00000042066	Tmcc2	protein_coding	1	132356315	transmembrane and coiled-coil domains 2	36.6077	-2.33506	0.324891	-4.10927	3.9692e-05	0.00215888
ENSMUSG00000102543	Pcdhgc5	protein_coding	18	37819513	protocadherin gamma subfamily C, 5	230.638	2.90043	0.465042	4.08659	4.37765e-05	0.00237558
ENSMUSG00000024486	Hbegf	protein_coding	18	36504929	heparin-binding EGF-like growth factor	8916.92	2.16567	0.285759	4.07921	4.51889e-05	0.00244801
ENSMUSG00000037628	Cdkn3	protein_coding	14	46760541	cyclin-dependent kinase inhibitor 3	66.6832	3.96479	0.727708	4.07414	4.61845e-05	0.0024948
ENSMUSG00000078202	Nrarp	protein_coding	2	25180758	Notch-regulated ankyrin repeat protein	259.207	2.23406	0.303133	4.07102	4.68077e-05	0.00252559
ENSMUSG00000028654	Mycl	protein_coding	4	122995652	v-myc avian myelocytomatosis viral oncogene lung carcinoma derived	169.325	-2.29861	0.320081	-4.05714	4.96775e-05	0.00266978
ENSMUSG00000028214	Gem	protein_coding	4	11704457	GTP binding protein (gene overexpressed in skeletal muscle)	475.582	-2.69459	0.419735	-4.03728	5.40736e-05	0.00288311
ENSMUSG00000074219	Gm10644	protein_coding	8	83932329	predicted gene 10644	36.6543	-2.79225	0.446625	-4.01286	5.99866e-05	0.00315923
ENSMUSG00000011034	Slc5a1	protein_coding	5	33104219	solute carrier family 5 (sodium/glucose cotransporter), member 1	354.179	-3.4771	0.617903	-4.00888	6.10066e-05	0.00320759
ENSMUSG00000066607	6030419C18Rik	protein_coding	9	58488603	RIKEN cDNA 6030419C18 gene	65.3998	-3.96899	0.742006	-4.00129	6.29974e-05	0.00329943
ENSMUSG00000024056	Ndc80	protein_coding	17	71496100	NDC80 kinetochore complex component	126.434	3.40807	0.602639	3.99588	6.44543e-05	0.00336828
ENSMUSG00000003779	Kif20a	protein_coding	18	34624624	kinesin family member 20A	398.863	3.23531	0.559977	3.99179	6.5576e-05	0.00342312
ENSMUSG00000075296	Aldh3b2	protein_coding	19	3972328	aldehyde dehydrogenase 3 family, member B2	24.9496	3.57936	0.647195	3.98545	6.7352e-05	0.00351002
ENSMUSG00000024365	Cyp21a1	protein_coding	17	34801348	cytochrome P450, family 21, subfamily a, polypeptide 1	67.0602	4.4069	0.856364	3.97833	6.94012e-05	0.00360688
ENSMUSG00000054555	Adam12	protein_coding	7	133883199	a disintegrin and metallopeptidase domain 12 (meltrin alpha)	271.595	2.34418	0.339553	3.95868	7.53649e-05	0.00389118
ENSMUSG00000072812	Ahnak2	protein_coding	12	112772194	AHNAK nucleoprotein 2	1228.19	2.29064	0.326579	3.95202	7.74957e-05	0.00398814
ENSMUSG00000022769	Sdf2l1	protein_coding	16	17130138	stromal cell-derived factor 2-like 1	832.388	2.25754	0.319213	3.9395	8.16522e-05	0.0041839
ENSMUSG00000042306	S100a14	protein_coding	3	90526856	S100 calcium binding protein A14	4701.69	2.37996	0.350602	3.93597	8.28603e-05	0.00424116
ENSMUSG00000044201	Cdc25c	protein_coding	18	34732997	cell division cycle 25C	61.4022	3.92363	0.74405	3.92935	8.5176e-05	0.00435498
ENSMUSG00000062515	Fabp4	protein_coding	3	10204088	fatty acid binding protein 4, adipocyte	88.3924	-3.20113	0.561835	-3.91774	8.93812e-05	0.00455032
ENSMUSG00000028873	Cdca8	protein_coding	4	124918465	cell division cycle associated 8	272.205	3.27668	0.581922	3.91234	9.14063e-05	0.00464342
ENSMUSG00000030050	Gkn1	protein_coding	6	87345650	gastrokine 1	13868.8	3.74747	0.702357	3.91178	9.16171e-05	0.00464914
ENSMUSG00000037990	Sh3rf3	protein_coding	10	58813359	SH3 domain containing ring finger 3	104.269	-2.6621	0.424982	-3.91099	9.19191e-05	0.00465697
ENSMUSG00000071604	Fam189a2	protein_coding	19	23972751	family with sequence similarity 189, member A2	1874.86	-1.77006	0.197629	-3.89653	9.75822e-05	0.0049228
ENSMUSG00000049404	Rarres1	protein_coding	3	67478972	retinoic acid receptor responder (tazarotene induced) 1	54.9033	3.50017	0.641922	3.89482	9.82733e-05	0.00495239
ENSMUSG00000046295	Ankle1	protein_coding	8	71406010	ankyrin repeat and LEM domain containing 1	64.659	3.13497	0.548613	3.89158	9.95938e-05	0.00501359
ENSMUSG00000017607	Tns4	protein_coding	11	99065678	tensin 4	1683.8	2.51988	0.391352	3.88366	0.000102894	0.00516601
ENSMUSG00000020914	Top2a	protein_coding	11	98992943	topoisomerase (DNA) II alpha	1632.36	3.33716	0.602402	3.87974	0.00010457	0.00524458
ENSMUSG00000020388	Pdlim4	protein_coding	11	54054928	PDZ and LIM domain 4	111.666	2.63639	0.421874	3.87885	0.00010495	0.00526085
ENSMUSG00000026683	Nuf2	protein_coding	1	169497934	NUF2, NDC80 kinetochore complex component	190.04	2.94119	0.50182	3.86829	0.000109601	0.00546502
ENSMUSG00000035626	Olfr1509	protein_coding	14	52442990	olfactory receptor 1509	174.757	2.11248	0.288152	3.86075	0.000113041	0.00562471
ENSMUSG00000032549	Rab6b	protein_coding	9	103111787	RAB6B, member RAS oncogene family	107.611	-4.09062	0.80078	-3.85951	0.000113614	0.00564729
ENSMUSG00000028128	F3	protein_coding	3	121723537	coagulation factor III	9656.63	3.28753	0.593304	3.85557	0.00011546	0.00573603
ENSMUSG00000033268	Duox1	protein_coding	2	122315672	dual oxidase 1	50.9076	-6.36148	1.39111	-3.85412	0.000116148	0.0057672
ENSMUSG00000024030	Abcg1	protein_coding	17	31057698	ATP-binding cassette, sub-family G (WHITE), member 1	608.705	-2.3764	0.357834	-3.84647	0.000119833	0.00593147
ENSMUSG00000041605	5730559C18Rik	protein_coding	1	136213531	RIKEN cDNA 5730559C18 gene	3183.52	1.62115	0.16196	3.83519	0.000125469	0.00619748
ENSMUSG00000020089	Ppa1	protein_coding	10	61648552	pyrophosphatase (inorganic) 1	1175.4	1.66634	0.173982	3.82995	0.00012817	0.00631772
ENSMUSG00000022132	Cldn10	protein_coding	14	118787908	claudin 10	27.6043	-3.69083	0.704173	-3.82126	0.00013277	0.0065173
ENSMUSG00000036278	Macrod1	protein_coding	19	7056768	MACRO domain containing 1	453.429	-1.77533	0.203611	-3.80789	0.000140157	0.00686213
ENSMUSG00000023015	Racgap1	protein_coding	15	99620496	Rac GTPase-activating protein 1	566.12	2.9105	0.502138	3.80473	0.00014196	0.00694321
ENSMUSG00000097740	E030044B06Rik	lincRNA	19	40868386	RIKEN cDNA E030044B06 gene	9.84904	-3.29423	0.603376	-3.80233	0.000143341	0.00700712
ENSMUSG00000052430	Bmpr1b	protein_coding	3	141837136	bone morphogenetic protein receptor, type 1B	10.5423	-3.34403	0.616662	-3.80116	0.000144019	0.00702916
ENSMUSG00000002076	Hsf2bp	protein_coding	17	31944769	heat shock transcription factor 2 binding protein	45.8264	3.14742	0.565233	3.79918	0.000145175	0.00707484
ENSMUSG00000028068	Iqgap3	protein_coding	3	88081971	IQ motif containing GTPase activating protein 3	383.553	2.90742	0.502604	3.79506	0.000147605	0.00718587
ENSMUSG00000008136	Fhl2	protein_coding	1	43123074	four and a half LIM domains 2	939.145	3.16903	0.572302	3.79001	0.00015064	0.00731245
ENSMUSG00000024173	Tpsab1	protein_coding	17	25343245	tryptase alpha/beta 1	30.9217	4.3469	0.883384	3.78872	0.000151423	0.00733778
ENSMUSG00000043017	Ptgir	protein_coding	7	16906490	prostaglandin I receptor (IP)	53.0359	-3.02963	0.535974	-3.78681	0.000152596	0.00738325
ENSMUSG00000060487	Samd5	protein_coding	10	9622936	sterile alpha motif domain containing 5	750.688	2.5984	0.423502	3.77425	0.000160487	0.00774133
ENSMUSG00000034311	Kif4	protein_coding	X	100625737	kinesin family member 4	256.652	3.45953	0.652242	3.77089	0.000162666	0.00783447
ENSMUSG00000049916	2610318N02Rik	protein_coding	16	17113399	RIKEN cDNA 2610318N02 gene	29.6878	4.0333	0.805013	3.76801	0.000164551	0.00790113
ENSMUSG00000039851	4932438H23Rik	protein_coding	16	91053935	RIKEN cDNA 4932438H23 gene	17.1808	3.62972	0.699071	3.76173	0.000168741	0.00808592
ENSMUSG00000031015	Swap70	protein_coding	7	110221711	SWA-70 protein	874.557	-1.86341	0.229562	-3.76111	0.00016916	0.00809777
ENSMUSG00000028678	Kif2c	protein_coding	4	117159639	kinesin family member 2C	183.314	2.86168	0.49547	3.7574	0.000171685	0.00821448
ENSMUSG00000026068	Il18rap	protein_coding	1	40515362	interleukin 18 receptor accessory protein	927.683	2.23459	0.330186	3.73907	0.000184702	0.00877522
ENSMUSG00000090291	Lrrc10b	protein_coding	19	10455371	leucine rich repeat containing 10B	214.188	2.91088	0.511666	3.73462	0.000188002	0.00892303
ENSMUSG00000005950	P2rx5	protein_coding	11	73160421	purinergic receptor P2X, ligand-gated ion channel, 5	158.664	-2.17854	0.317081	-3.71686	0.000201718	0.00953575
ENSMUSG00000028786	Tmem54	protein_coding	4	129105548	transmembrane protein 54	1554.9	1.82828	0.223296	3.70934	0.000207798	0.00979778
ENSMUSG00000032864	Rag2	protein_coding	2	101624718	recombination activating gene 2	181.534	2.11547	0.301768	3.69643	0.000218651	0.010234
ENSMUSG00000053783	1700016K19Rik	protein_coding	11	75999912	RIKEN cDNA 1700016K19 gene	13.6112	-3.27435	0.616604	-3.68851	0.000225573	0.0105319
ENSMUSG00000004562	Arhgef40	protein_coding	14	51984719	Rho guanine nucleotide exchange factor (GEF) 40	2427.75	1.66341	0.18009	3.6838	0.00022978	0.0107072
ENSMUSG00000035455	Fignl1	protein_coding	11	11787431	fidgetin-like 1	83.7501	2.90735	0.5178	3.68357	0.000229991	0.0107118
ENSMUSG00000026622	Nek2	protein_coding	1	191821444	NIMA (never in mitosis gene a)-related expressed kinase 2	251.23	3.177	0.59104	3.68333	0.000230209	0.0107166
ENSMUSG00000037725	Ckap2	protein_coding	8	22168160	cytoskeleton associated protein 2	180.118	3.17306	0.592348	3.66855	0.000243928	0.0113163
ENSMUSG00000002475	Abhd3	protein_coding	18	10644411	abhydrolase domain containing 3	103.05	-2.07563	0.293286	-3.66753	0.000244907	0.0113562
ENSMUSG00000038379	Ttk	protein_coding	9	83834689	Ttk protein kinase	95.0561	3.21132	0.604168	3.66011	0.00025211	0.0116332
ENSMUSG00000028718	Stil	protein_coding	4	115000159	Scl/Tal1 interrupting locus	94.4869	2.75296	0.479934	3.65251	0.000259688	0.0119654
ENSMUSG00000020897	Aurkb	protein_coding	11	69045647	aurora kinase B	206.18	3.27724	0.623815	3.65051	0.000261721	0.0120415
ENSMUSG00000026879	Gsn	protein_coding	2	35256380	gelsolin	14565.7	1.96259	0.2638	3.64895	0.000263311	0.0121087
ENSMUSG00000028699	Tspan1	protein_coding	4	116161869	tetraspanin 1	7550.5	2.21463	0.333323	3.644	0.000268436	0.0123145
ENSMUSG00000040212	Emp3	protein_coding	7	45918023	epithelial membrane protein 3	353.126	2.35564	0.372895	3.63545	0.000277498	0.0126933
ENSMUSG00000029516	Cit	protein_coding	5	115845278	citron	222.12	2.70136	0.468015	3.63527	0.000277689	0.0126959
ENSMUSG00000020649	Rrm2	protein_coding	12	24708241	ribonucleotide reductase M2	333.539	3.0998	0.579301	3.62471	0.000289283	0.0131498
ENSMUSG00000046179	E2f8	protein_coding	7	48866429	E2F transcription factor 8	160.083	3.50749	0.692129	3.62287	0.000291357	0.0132377
ENSMUSG00000064147	Rab44	protein_coding	17	29135056	RAB44, member RAS oncogene family	65.7211	-2.43303	0.397119	-3.60856	0.000307896	0.0139623
ENSMUSG00000038732	Mboat1	protein_coding	13	30136489	membrane bound O-acyltransferase domain containing 1	5804.17	2.17526	0.325721	3.60819	0.000308344	0.0139706
ENSMUSG00000067006	Serpinb5	protein_coding	1	106861173	serine (or cysteine) peptidase inhibitor, clade B, member 5	1102.45	2.41406	0.392205	3.60541	0.000311661	0.0140992
ENSMUSG00000026605	Cenpf	protein_coding	1	189640606	centromere protein F	558.229	3.49127	0.691765	3.60132	0.000316607	0.0143093
ENSMUSG00000015880	Ncapg	protein_coding	5	45669919	non-SMC condensin I complex, subunit G	178.396	3.25454	0.626133	3.60073	0.000317328	0.014335
ENSMUSG00000030543	Mesp2	protein_coding	7	79810727	mesoderm posterior 2	36.3557	-2.42273	0.395527	-3.59704	0.000321858	0.0145051
ENSMUSG00000013338	Fer1l4	protein_coding	2	156019139	fer-1-like 4 (C. elegans)	1993.62	2.90525	0.530099	3.59414	0.000325464	0.0146188
ENSMUSG00000021594	Srd5a1	protein_coding	13	69573449	steroid 5 alpha-reductase 1	756.256	2.13747	0.316988	3.58837	0.000332748	0.0149036
ENSMUSG00000039062	Anpep	protein_coding	7	79821803	alanyl (membrane) aminopeptidase	891.947	-3.09982	0.585238	-3.58797	0.000333264	0.0149126
ENSMUSG00000003354	Ccdc65	protein_coding	15	98708207	coiled-coil domain containing 65	27.1075	2.75661	0.489707	3.58705	0.000334434	0.0149579
ENSMUSG00000028044	Cks1b	protein_coding	3	89415472	CDC28 protein kinase 1b	495.336	2.19051	0.332969	3.57544	0.000349646	0.0155647
ENSMUSG00000045763	Basp1	protein_coding	15	25363285	brain abundant, membrane attached signal protein 1	1829.23	2.40792	0.395362	3.56108	0.000369335	0.0163795
ENSMUSG00000025911	Adhfe1	protein_coding	1	9547948	alcohol dehydrogenase, iron containing, 1	58.6469	-2.92768	0.541372	-3.56073	0.00036983	0.0163938
ENSMUSG00000059279	Olfr224	protein_coding	11	58565856	olfactory receptor 224	19.2668	3.19888	0.618309	3.55628	0.000376145	0.0166425
ENSMUSG00000031613	Hpgd	protein_coding	8	56294585	hydroxyprostaglandin dehydrogenase 15 (NAD)	221.798	-1.96741	0.272578	-3.54913	0.000386511	0.0170693
ENSMUSG00000041431	Ccnb1	protein_coding	13	100778650	cyclin B1	301.914	3.29145	0.645613	3.54926	0.000386321	0.0170693
ENSMUSG00000047281	Sfn	protein_coding	4	133600556	stratifin	3338.47	2.17362	0.331256	3.54295	0.000395682	0.0174498
ENSMUSG00000014030	Pax5	protein_coding	4	44524757	paired box 5	45.1747	-4.33905	0.944773	-3.53424	0.000408951	0.017968
ENSMUSG00000044664	Prss42	protein_coding	9	110798166	protease, serine 42	23.2339	3.93979	0.833578	3.52672	0.000420746	0.0184605
ENSMUSG00000047117	Ankdd1b	protein_coding	13	96416134	ankyrin repeat and death domain containing 1B	226.903	2.88005	0.533719	3.52254	0.000427427	0.0187276
ENSMUSG00000030748	Il4ra	protein_coding	7	125552120	interleukin 4 receptor, alpha	12432.7	2.04992	0.299245	3.50857	0.00045052	0.0196575
ENSMUSG00000027030	Stk39	protein_coding	2	68210445	serine/threonine kinase 39	4418.71	1.70129	0.200094	3.5048	0.000456956	0.0198745
ENSMUSG00000031877	Ces2g	protein_coding	8	104961718	carboxylesterase 2G	2420.06	-2.56368	0.446153	-3.50479	0.000456962	0.0198745
ENSMUSG00000036832	Lpar3	protein_coding	3	146220963	lysophosphatidic acid receptor 3	159.065	-1.85854	0.245495	-3.49716	0.000470238	0.0204144
ENSMUSG00000027849	Syt6	protein_coding	3	103575231	synaptotagmin VI	16.2329	3.31789	0.662885	3.49667	0.000471112	0.0204429
ENSMUSG00000039196	Orm1	protein_coding	4	63344560	orosomucoid 1	317.84	3.03473	0.587549	3.46308	0.000534036	0.0229316
ENSMUSG00000020846	Rflnb	protein_coding	11	76019194	refilin B	942.637	-1.88847	0.256864	-3.45892	0.000542348	0.0232253
ENSMUSG00000029177	Cenpa	protein_coding	5	30666777	centromere protein A	272.244	2.97209	0.570375	3.45753	0.000545143	0.0233344
ENSMUSG00000042485	Mustn1	protein_coding	14	30879257	musculoskeletal, embryonic nuclear protein 1	45.9977	-2.2296	0.3572	-3.44234	0.000576713	0.0245414
ENSMUSG00000063011	Msln	protein_coding	17	25748614	mesothelin	5339.65	2.72964	0.502612	3.44131	0.000578908	0.0246127
ENSMUSG00000035875	AI182371	protein_coding	2	35084046	expressed sequence AI182371	45.9386	-2.44024	0.418739	-3.43948	0.000582838	0.0247132
ENSMUSG00000015354	Pcolce2	protein_coding	9	95637601	procollagen C-endopeptidase enhancer 2	57.8002	-2.42405	0.416678	-3.41762	0.000631714	0.0265595
ENSMUSG00000004328	Hif3a	protein_coding	7	17031507	hypoxia inducible factor 3, alpha subunit	270.24	4.26766	0.957736	3.41186	0.000645202	0.0270545
ENSMUSG00000097633	Gm16617	lincRNA	14	51986389	predicted gene, 16617	23.8095	2.68038	0.494099	3.4009	0.000671645	0.0280514
ENSMUSG00000031562	Dctd	protein_coding	8	48099092	dCMP deaminase	157.241	2.55218	0.45757	3.39223	0.000693269	0.0288527
ENSMUSG00000026574	Dpt	protein_coding	1	164796644	dermatopontin	18.5533	-2.66677	0.492332	-3.38547	0.000710562	0.0294429
ENSMUSG00000048480	Cxcr1	protein_coding	1	74191785	chemokine (C-X-C motif) receptor 1	18.0702	-2.89268	0.559579	-3.38233	0.000718747	0.029756
ENSMUSG00000004814	Ccl24	protein_coding	5	135569937	chemokine (C-C motif) ligand 24	8.82014	-4.91865	1.16047	-3.37678	0.000733409	0.0302571
ENSMUSG00000066975	Cryba4	protein_coding	5	112246493	crystallin, beta A4	2.42309	-4.95579	1.17222	-3.37462	0.000739172	0.030455
ENSMUSG00000042367	Gjb3	protein_coding	4	127325235	gap junction protein, beta 3	1379.61	1.70459	0.208803	3.37443	0.000739699	0.0304635
ENSMUSG00000042029	Ncapg2	protein_coding	12	116405402	non-SMC condensin II complex, subunit G2	409.438	2.23573	0.366458	3.37209	0.000745997	0.0306856
ENSMUSG00000022226	Mcpt2	protein_coding	14	56042123	mast cell protease 2	534.666	3.6191	0.776878	3.37132	0.000748085	0.030742
ENSMUSG00000028862	Map3k6	protein_coding	4	133240818	mitogen-activated protein kinase kinase kinase 6	96.2365	2.6009	0.475166	3.36915	0.00075401	0.0309183
ENSMUSG00000015665	Awat1	protein_coding	X	100572251	acyl-CoA wax alcohol acyltransferase 1	17.2895	-3.44603	0.728176	-3.35912	0.000781915	0.0319202
ENSMUSG00000031906	Smpd3	protein_coding	8	106252548	sphingomyelin phosphodiesterase 3, neutral	4240.64	2.68054	0.500775	3.35587	0.000791167	0.0322325
ENSMUSG00000030617	Ccdc83	protein_coding	7	90223873	coiled-coil domain containing 83	124.918	2.17006	0.349367	3.34909	0.000810788	0.0329326
ENSMUSG00000020399	Havcr2	protein_coding	11	46454935	hepatitis A virus cellular receptor 2	65.727	-2.49083	0.445717	-3.34478	0.000823483	0.0333909
ENSMUSG00000042826	Fgf11	protein_coding	11	69796068	fibroblast growth factor 11	173.782	-2.03344	0.309279	-3.34144	0.00083344	0.0337369
ENSMUSG00000051022	Hs3st1	protein_coding	5	39613935	heparan sulfate (glucosamine) 3-O-sulfotransferase 1	1802.81	2.25786	0.376513	3.34081	0.000835329	0.0337844
ENSMUSG00000089837	Npcd	protein_coding	15	79789675	neuronal pentraxin chromo domain	9.62238	6.33797	1.60325	3.32947	0.000870114	0.0350266
ENSMUSG00000075602	Ly6a	protein_coding	15	74994877	lymphocyte antigen 6 complex, locus A	2831.22	2.59892	0.480643	3.32662	0.000879049	0.0353562
ENSMUSG00000056973	Ces1d	protein_coding	8	93166068	carboxylesterase 1D	5112.51	-1.69006	0.207456	-3.32627	0.000880153	0.0353856
ENSMUSG00000022322	Shcbp1	protein_coding	8	4735976	Shc SH2-domain binding protein 1	118.709	2.61199	0.484966	3.32393	0.000887569	0.035593
ENSMUSG00000027326	Knl1	protein_coding	2	119047119	kinetochore scaffold 1	119.04	2.86361	0.560638	3.32409	0.000887087	0.035593
ENSMUSG00000105053	Gm43064	protein_coding	3	103809573	predicted gene 43064	5.11282	-6.10418	1.53638	-3.32222	0.000893056	0.0357676
ENSMUSG00000026840	Lamc3	protein_coding	2	31887291	laminin gamma 3	16.3003	-3.65722	0.800248	-3.32049	0.000898588	0.0359283
ENSMUSG00000038910	Plcl2	protein_coding	17	50509547	phospholipase C-like 2	178.203	-2.04042	0.313568	-3.318	0.00090666	0.0362052
ENSMUSG00000034918	Cdhr2	protein_coding	13	54701461	cadherin-related family member 2	725.62	3.84374	0.857449	3.31651	0.000911478	0.0363822
ENSMUSG00000029414	Kntc1	protein_coding	5	123749716	kinetochore associated 1	212.702	2.82717	0.550953	3.31638	0.000911915	0.0363843
ENSMUSG00000000530	Acvrl1	protein_coding	15	101128522	activin A receptor, type II-like 1	173.837	-1.99086	0.298968	-3.31425	0.000918882	0.036616
ENSMUSG00000018927	Ccl6	protein_coding	11	83587882	chemokine (C-C motif) ligand 6	1951.36	-2.50756	0.458025	-3.29143	0.000996797	0.0394385
ENSMUSG00000021186	Fbln5	protein_coding	12	101746565	fibulin 5	737.672	-2.10012	0.334809	-3.28582	0.00101686	0.0401097
ENSMUSG00000025347	Mettl7b	protein_coding	10	128958274	methyltransferase like 7B	444.028	2.28583	0.39129	3.28614	0.0010157	0.0401097
ENSMUSG00000054453	Sytl5	protein_coding	X	9885622	synaptotagmin-like 5	462.563	2.07988	0.328638	3.28594	0.00101644	0.0401097
ENSMUSG00000070942	Il1rl2	protein_coding	1	40324610	interleukin 1 receptor-like 2	718.802	1.77395	0.235945	3.28021	0.00103728	0.0408525
ENSMUSG00000001785	Pwp1	protein_coding	10	85829494	PWP1 homolog, endonuclein	1795.81	1.86516	0.264193	3.27472	0.00105767	0.0415862
ENSMUSG00000097930	C330002G04Rik	lincRNA	19	23037390	RIKEN cDNA C330002G04 gene	13.5949	-2.4471	0.442009	-3.27392	0.00106067	0.0416867
ENSMUSG00000038259	Gdf5	protein_coding	2	155941023	growth differentiation factor 5	93.6927	-2.70988	0.522982	-3.26949	0.00107743	0.0422052
ENSMUSG00000032373	Car12	protein_coding	9	66713686	carbonic anhydrase 12	32.7867	2.77955	0.544423	3.26868	0.0010805	0.0422905
ENSMUSG00000028175	Depdc1a	protein_coding	3	159495433	DEP domain containing 1a	66.5616	3.38455	0.73202	3.25749	0.00112404	0.0437773
ENSMUSG00000022221	Ripk3	protein_coding	14	55784996	receptor-interacting serine-threonine kinase 3	325.511	1.7651	0.235059	3.25491	0.00113428	0.0440492
ENSMUSG00000050463	Krt78	protein_coding	15	101946004	keratin 78	39.1362	2.56792	0.482077	3.25243	0.00114423	0.0443628
ENSMUSG00000097754	Ptgs2os2	lincRNA	1	150159043	prostaglandin-endoperoxide synthase 2, opposite strand 2	447.176	2.42385	0.438245	3.24897	0.00115825	0.0448512
ENSMUSG00000053414	Hunk	protein_coding	16	90386397	hormonally upregulated Neu-associated kinase	397.188	3.6955	0.830216	3.24674	0.00116734	0.0451479
ENSMUSG00000015243	Abca1	protein_coding	4	53030787	ATP-binding cassette, sub-family A (ABC1), member 1	1217.22	-2.50067	0.462473	-3.24489	0.00117496	0.045424
ENSMUSG00000032584	Mst1r	protein_coding	9	107906873	macrophage stimulating 1 receptor (c-met-related tyrosine kinase)	1375.74	3.47479	0.762892	3.24395	0.00117884	0.0455553
ENSMUSG00000068196	Col8a1	protein_coding	16	57624258	collagen, type VIII, alpha 1	50.7025	2.62348	0.500868	3.24134	0.00118971	0.0459192
ENSMUSG00000073678	Pgap1	protein_coding	1	54472994	post-GPI attachment to proteins 1	1856.87	1.86234	0.266385	3.23719	0.00120712	0.0464966
ENSMUSG00000045312	Lhfpl2	protein_coding	13	94057796	lipoma HMGIC fusion partner-like 2	194.827	-2.51114	0.468876	-3.22291	0.00126898	0.0486389
ENSMUSG00000048096	Lmod1	protein_coding	1	135324807	leiomodin 1 (smooth muscle)	30.251	-3.27738	0.706977	-3.22129	0.00127615	0.0487978
ENSMUSG00000043832	Clec4a3	protein_coding	6	122952515	C-type lectin domain family 4, member a3	48.0788	-2.77696	0.55211	-3.21848	0.00128872	0.0491992
ENSMUSG00000029821	Dfna5	protein_coding	6	50188888	deafness, autosomal dominant 5 (human)	330.098	1.82077	0.255091	3.21757	0.0012928	0.0493349
ENSMUSG00000030584	Dpf1	protein_coding	7	29303951	D4, zinc and double PHD fingers family 1	23.7021	2.41888	0.441013	3.21731	0.00129398	0.0493599
ENSMUSG00000038776	Ephx1	protein_coding	1	180976210	epoxide hydrolase 1, microsomal	1766.47	-2.13156	0.351834	-3.21618	0.00129907	0.0494944
ENSMUSG00000027442	Cst8	protein_coding	2	148798785	cystatin 8 (cystatin-related epididymal spermatogenic)	73.3673	-3.2966	0.714574	-3.21394	0.00130926	0.0498126
ENSMUSG00000006398	Cdc20	protein_coding	4	118432901	cell division cycle 20	693.835	2.64356	0.512329	3.20802	0.00133651	0.0506965
ENSMUSG00000050578	Mmp13	protein_coding	9	7272514	matrix metallopeptidase 13	41.9116	2.98124	0.620993	3.19044	0.00142055	0.0535406
ENSMUSG00000035775	Krt20	protein_coding	11	99428403	keratin 20	4535.99	3.1694	0.680113	3.18976	0.0014239	0.0536244
ENSMUSG00000044827	Tlr1	protein_coding	5	64924679	toll-like receptor 1	25.7114	-3.50439	0.785177	-3.18959	0.00142474	0.0536346
ENSMUSG00000038295	Atg9b	protein_coding	5	24384181	autophagy related 9B	263.125	2.40678	0.441094	3.1893	0.00142618	0.0536675
ENSMUSG00000027654	Fam83d	protein_coding	2	158768093	family with sequence similarity 83, member D	133.868	2.83431	0.575608	3.18673	0.00143889	0.0541028
ENSMUSG00000039628	Hs3st6	protein_coding	17	24753003	heparan sulfate (glucosamine) 3-O-sulfotransferase 6	8.21231	-3.82183	0.886129	-3.18444	0.00145033	0.0544894
ENSMUSG00000060063	Alox5ap	protein_coding	5	149264767	arachidonate 5-lipoxygenase activating protein	167.915	-2.10369	0.347713	-3.17414	0.0015028	0.0562375
ENSMUSG00000026655	Fam107b	protein_coding	2	3613758	family with sequence similarity 107, member B	6410.39	1.84099	0.265098	3.17238	0.00151196	0.0564911
ENSMUSG00000032454	Rbp2	protein_coding	9	98486115	retinol binding protein 2, cellular	168.004	3.92684	0.927449	3.15579	0.00160062	0.059496
ENSMUSG00000036526	Card11	protein_coding	5	140872990	caspase recruitment domain family, member 11	171.262	-2.77276	0.56227	-3.15287	0.00161675	0.0599802
ENSMUSG00000052821	Cysltr1	protein_coding	X	106574346	cysteinyl leukotriene receptor 1	78.6507	2.49767	0.475363	3.15058	0.00162949	0.0604289
ENSMUSG00000042489	Clspn	protein_coding	4	126556935	claspin	183.941	2.88449	0.598503	3.14867	0.00164013	0.0607522
ENSMUSG00000039013	Siglecf	protein_coding	7	43351341	sialic acid binding Ig-like lectin F	99.9785	-2.63829	0.521262	-3.14294	0.0016726	0.0618579
ENSMUSG00000031430	Vsig1	protein_coding	X	140907608	V-set and immunoglobulin domain containing 1	2886.41	2.30674	0.415916	3.14184	0.00167891	0.0620188
ENSMUSG00000033082	Clec1a	protein_coding	6	129424772	C-type lectin domain family 1, member a	26.4929	-2.23655	0.39403	-3.13821	0.00169984	0.0624993
ENSMUSG00000093661	Eif4e3	protein_coding	6	99625135	eukaryotic translation initiation factor 4E member 3	133.529	-1.71754	0.228922	-3.13443	0.0017219	0.0632855
ENSMUSG00000051378	Kif18b	protein_coding	11	102905529	kinesin family member 18B	135.446	3.53273	0.810275	3.12576	0.00177345	0.064928
ENSMUSG00000002900	Lamb1	protein_coding	12	31265234	laminin B1	510.231	2.46181	0.468276	3.12168	0.00179823	0.0657589
ENSMUSG00000078776	9530053A07Rik	protein_coding	7	28129466	RIKEN cDNA 9530053A07 gene	88.8965	2.03528	0.332143	3.11697	0.00182717	0.066663
ENSMUSG00000044349	Snhg11	protein_coding	2	158375638	small nucleolar RNA host gene 11	190.271	-2.93808	0.622329	-3.11424	0.00184421	0.0672067
ENSMUSG00000002055	Spag5	protein_coding	11	78301529	sperm associated antigen 5	272.156	2.34699	0.432654	3.11332	0.00184996	0.0673646
ENSMUSG00000020256	Aldh1l2	protein_coding	10	83487450	aldehyde dehydrogenase 1 family, member L2	303.353	-2.5124	0.486374	-3.10954	0.00187381	0.0681279
ENSMUSG00000046213	Cym	protein_coding	3	107211293	chymosin	4211.37	-4.22028	1.03863	-3.10051	0.00193189	0.0698639
ENSMUSG00000027323	Rad51	protein_coding	2	119112793	RAD51 recombinase	177.362	2.75842	0.569599	3.08712	0.00202105	0.0727825
ENSMUSG00000037474	Dtl	protein_coding	1	191537356	denticleless E3 ubiquitin protein ligase	160.528	2.61431	0.524015	3.08065	0.00206547	0.0741563
ENSMUSG00000031596	Slc7a2	protein_coding	8	40862396	solute carrier family 7 (cationic amino acid transporter, y+ system), member 2	451.157	-2.12607	0.365793	-3.07843	0.00208094	0.0745703
ENSMUSG00000043664	Tmem221	protein_coding	8	71554238	transmembrane protein 221	51.6992	-3.11496	0.68775	-3.07519	0.00210371	0.075244
ENSMUSG00000027530	Fabp12	protein_coding	3	10244209	fatty acid binding protein 12	14.0466	-3.25423	0.733124	-3.07483	0.00210623	0.0753054
ENSMUSG00000026779	Mastl	protein_coding	2	23115606	microtubule associated serine/threonine kinase-like	140.205	2.16284	0.378264	3.07414	0.00211111	0.0754513
ENSMUSG00000086320	Gm12840	lincRNA	4	117700188	predicted gene 12840	2226.04	2.85172	0.60264	3.07268	0.00212149	0.0757653
ENSMUSG00000006542	Prkag3	protein_coding	1	74738922	protein kinase, AMP-activated, gamma 3 non-catatlytic subunit	13.9468	-2.82939	0.597368	-3.06242	0.00219554	0.0780269
ENSMUSG00000015981	Stk32c	protein_coding	7	139103638	serine/threonine kinase 32C	14.6244	-2.57842	0.515579	-3.06145	0.00220266	0.0782268
ENSMUSG00000003814	Calr	protein_coding	8	84841850	calreticulin	24864.3	1.48908	0.160278	3.05147	0.00227724	0.0806279
ENSMUSG00000027456	Sdcbp2	protein_coding	2	151572622	syndecan binding protein (syntenin) 2	2272.19	2.21458	0.398506	3.04783	0.00230497	0.0814595
ENSMUSG00000062960	Kdr	protein_coding	5	75932827	kinase insert domain protein receptor	70.7676	-2.02289	0.335595	-3.04798	0.00230389	0.0814595
ENSMUSG00000028755	Cda	protein_coding	4	138338424	cytidine deaminase	110.748	2.60016	0.525178	3.04689	0.0023122	0.0816211
ENSMUSG00000040380	Cbln3	protein_coding	14	55878920	cerebellin 3 precursor protein	58.8097	2.40178	0.460308	3.0453	0.00232447	0.0820237
ENSMUSG00000002111	Spi1	protein_coding	2	91082390	spleen focus forming virus (SFFV) proviral integration oncogene	147.295	-2.30145	0.427777	-3.04235	0.00234735	0.0827386
ENSMUSG00000000811	Txnrd3	protein_coding	6	89643988	thioredoxin reductase 3	996.603	-1.76287	0.251006	-3.03926	0.00237157	0.0834369
ENSMUSG00000049723	Mmp12	protein_coding	9	7344381	matrix metallopeptidase 12	161.274	-2.87113	0.616673	-3.03423	0.0024115	0.0848104
ENSMUSG00000032356	Rasgrf1	protein_coding	9	89909908	RAS protein-specific guanine nucleotide-releasing factor 1	860.587	2.53251	0.505784	3.02997	0.00244579	0.0858884
ENSMUSG00000068252	Apol7b	protein_coding	15	77422210	apolipoprotein L 7b	13.2512	5.36374	1.44466	3.0206	0.00252277	0.0881665
ENSMUSG00000015568	Lpl	protein_coding	8	68880491	lipoprotein lipase	1010.55	-2.60539	0.531694	-3.01939	0.00253283	0.0884527
ENSMUSG00000033847	Pla2g4c	protein_coding	7	13324655	phospholipase A2, group IVC (cytosolic, calcium-independent)	382.64	3.06465	0.684578	3.01594	0.00256183	0.0894324
ENSMUSG00000037071	Scd1	protein_coding	19	44394451	stearoyl-Coenzyme A desaturase 1	95160	-1.9858	0.326999	-3.0147	0.00257236	0.089767
ENSMUSG00000037313	Tacc3	protein_coding	5	33658128	transforming, acidic coiled-coil containing protein 3	456.615	2.20486	0.400257	3.01021	0.0026107	0.0910042
ENSMUSG00000021485	Mxd3	protein_coding	13	55325168	Max dimerization protein 3	59.8848	3.28583	0.759489	3.00969	0.00261512	0.0910912
ENSMUSG00000020227	Irak3	protein_coding	10	120141648	interleukin-1 receptor-associated kinase 3	452.784	2.01127	0.336787	3.0027	0.002676	0.0928759
ENSMUSG00000032400	Zwilch	protein_coding	9	64137144	zwilch kinetochore protein	123.792	2.29053	0.430097	3.00055	0.00269495	0.093459
ENSMUSG00000061825	Ces2c	protein_coding	8	104847068	carboxylesterase 2C	1217.5	-2.29508	0.43182	-2.99913	0.00270755	0.0937587
ENSMUSG00000033287	Kctd17	protein_coding	15	78428564	potassium channel tetramerisation domain containing 17	369.389	1.49835	0.16628	2.99704	0.00272616	0.0942651
ENSMUSG00000033044	Dhrs7c	protein_coding	11	67798187	dehydrogenase/reductase (SDR family) member 7C	3.08319	5.08393	1.36463	2.9927	0.00276518	0.0952534
ENSMUSG00000037106	Fer1l6	protein_coding	15	58510048	fer-1-like 6 (C. elegans)	1058.34	2.27287	0.42657	2.98396	0.00284541	0.0978169
ENSMUSG00000103421	Golt1a	protein_coding	1	133309800	golgi transport 1A	85.6227	2.47	0.492994	2.98179	0.00286568	0.0984778
ENSMUSG00000042115	Klhdc8a	protein_coding	1	132298626	kelch domain containing 8A	716.717	1.971	0.327271	2.96696	0.00300759	0.102906
ENSMUSG00000029270	Fam69a	protein_coding	5	107908053	family with sequence similarity 69, member A	318.619	-1.82702	0.279778	-2.95598	0.00311682	0.106183
ENSMUSG00000047728	BC025446	protein_coding	15	75216376	cDNA sequence BC025446	140.126	3.31933	0.786327	2.94958	0.00318209	0.108212
ENSMUSG00000027496	Aurka	protein_coding	2	172356190	aurora kinase A	255.766	2.54517	0.524061	2.94845	0.00319369	0.108528
ENSMUSG00000054619	Mettl7a1	protein_coding	15	100304817	methyltransferase like 7A1	10017.3	-1.74925	0.25413	-2.9483	0.00319531	0.108544
ENSMUSG00000048922	Cdca2	protein_coding	14	67676331	cell division cycle associated 2	174.07	2.60019	0.543068	2.94658	0.00321314	0.108993
ENSMUSG00000015401	Tmem27	protein_coding	X	164088830	transmembrane protein 27	29.3442	3.44823	0.832133	2.94211	0.00325982	0.110403
ENSMUSG00000031372	Trex2	protein_coding	X	73433705	three prime repair exonuclease 2	87.621	2.23078	0.418343	2.94204	0.00326054	0.110403
ENSMUSG00000039476	Prrx2	protein_coding	2	30834972	paired related homeobox 2	7.88185	3.3502	0.798795	2.94218	0.00325906	0.110403
ENSMUSG00000030499	Kctd15	protein_coding	7	34639014	potassium channel tetramerisation domain containing 15	151.39	-3.12759	0.7245	-2.93663	0.00331803	0.111989
ENSMUSG00000026407	Cacna1s	protein_coding	1	136052750	calcium channel, voltage-dependent, L type, alpha 1S subunit	10.9979	-2.83421	0.626059	-2.92977	0.00339211	0.114205
ENSMUSG00000073600	Prob1	protein_coding	18	35650351	proline rich basic protein 1	331.87	-2.38723	0.473912	-2.92719	0.0034204	0.114994
ENSMUSG00000029378	Areg	protein_coding	5	91139599	amphiregulin	9547.71	2.05064	0.359088	2.92585	0.00343517	0.115449
ENSMUSG00000042357	Gjb5	protein_coding	4	127354809	gap junction protein, beta 5	68.3661	2.14904	0.393187	2.92237	0.00347376	0.116457
ENSMUSG00000074622	Mafb	protein_coding	2	160363703	v-maf musculoaponeurotic fibrosarcoma oncogene family, protein B (avian)	485.936	2.45079	0.496913	2.9196	0.0035048	0.117331
ENSMUSG00000029917	C130060K24Rik	protein_coding	6	65381105	RIKEN cDNA C130060K24 gene	8.73608	-3.92504	1.00396	-2.9135	0.00357397	0.119225
ENSMUSG00000006205	Htra1	protein_coding	7	130936111	HtrA serine peptidase 1	231.943	-2.13631	0.390438	-2.91034	0.00361036	0.120311
ENSMUSG00000044734	Serpinb1a	protein_coding	13	32842092	serine (or cysteine) peptidase inhibitor, clade B, member 1a	1145.09	-1.87013	0.299487	-2.90539	0.00366793	0.121972
ENSMUSG00000024663	Rab3il1	protein_coding	19	10001669	RAB3A interacting protein (rabin3)-like 1	85.6882	-1.69962	0.240972	-2.90332	0.00369227	0.122739
ENSMUSG00000027699	Ect2	protein_coding	3	27097222	ect2 oncogene	473.277	2.28312	0.442193	2.90172	0.00371116	0.123323
ENSMUSG00000028464	Tpm2	protein_coding	4	43514711	tropomyosin 2, beta	914.102	2.18071	0.407189	2.89965	0.0037358	0.123881
ENSMUSG00000110380	Gm45332	lincRNA	8	92152096	predicted gene 45332	10.3953	-3.06515	0.712779	-2.89732	0.00376365	0.12463
ENSMUSG00000025557	Slc15a1	protein_coding	14	121459621	solute carrier family 15 (oligopeptide transporter), member 1	399.239	2.15644	0.399239	2.89662	0.00377212	0.124823
ENSMUSG00000047222	Rnase2a	protein_coding	14	51255266	ribonuclease, RNase A family, 2A (liver, eosinophil-derived neurotoxin)	14.7908	-4.78648	1.30806	-2.89473	0.0037948	0.125442
ENSMUSG00000026170	Cyp27a1	protein_coding	1	74713574	cytochrome P450, family 27, subfamily a, polypeptide 1	25.1687	-2.71813	0.593698	-2.89395	0.00380431	0.125712
ENSMUSG00000024112	Cacna1h	protein_coding	17	25374285	calcium channel, voltage-dependent, T type, alpha 1H subunit	303.87	3.02576	0.700759	2.89081	0.00384252	0.126886
ENSMUSG00000003420	Fcgrt	protein_coding	7	45092990	Fc receptor, IgG, alpha chain transporter	551.918	-2.75266	0.606797	-2.88838	0.00387232	0.127648
ENSMUSG00000022227	Mcpt1	protein_coding	14	56017964	mast cell protease 1	98.073	3.30488	0.798217	2.88754	0.0038827	0.127828
ENSMUSG00000078664	Sprr2a1	protein_coding	3	92215799	small proline-rich protein 2A1	107.71	2.86866	0.647227	2.88718	0.00388716	0.127914
ENSMUSG00000022385	Gtse1	protein_coding	15	85859707	G two S phase expressed protein 1	122.138	2.34863	0.467223	2.88647	0.00389587	0.128156
ENSMUSG00000024011	Pi16	protein_coding	17	29318877	peptidase inhibitor 16	19.8942	-2.11204	0.385457	-2.885	0.00391414	0.128656
ENSMUSG00000021118	Plek2	protein_coding	12	78888691	pleckstrin 2	917.493	1.7058	0.244842	2.88266	0.00394331	0.129492
ENSMUSG00000032265	Fam46a	protein_coding	9	85320439	family with sequence similarity 46, member A	451.726	-1.73725	0.255905	-2.88095	0.00396473	0.130014
ENSMUSG00000020415	Pttg1	protein_coding	11	43420250	pituitary tumor-transforming gene 1	216.406	2.88011	0.652977	2.87929	0.00398567	0.130611
ENSMUSG00000030789	Itgax	protein_coding	7	128129547	integrin alpha X	588.894	-2.47443	0.51228	-2.87817	0.00399988	0.130986
ENSMUSG00000029762	Akr1b8	protein_coding	6	34354119	aldo-keto reductase family 1, member B8	4995.34	1.63753	0.221567	2.87736	0.00401016	0.131242
ENSMUSG00000100255	Gm28196	lincRNA	2	129948568	predicted gene 28196	284.066	1.549	0.191002	2.8743	0.00404918	0.132463
ENSMUSG00000026712	Mrc1	protein_coding	2	14229392	mannose receptor, C type 1	483.397	-2.23284	0.429011	-2.87368	0.0040572	0.132679
ENSMUSG00000055805	Fmnl1	protein_coding	11	103171107	formin-like 1	167.293	-2.27649	0.444922	-2.86902	0.00411748	0.134418
ENSMUSG00000021390	Ogn	protein_coding	13	49608046	osteoglycin	11.5054	-2.63852	0.571567	-2.86672	0.0041475	0.135212
ENSMUSG00000039748	Exo1	protein_coding	1	175880581	exonuclease 1	99.0403	2.32463	0.462556	2.86372	0.004187	0.136265
ENSMUSG00000064177	Ghrl	protein_coding	6	113716119	ghrelin	45.0552	2.89836	0.66496	2.85484	0.00430586	0.139271
ENSMUSG00000047443	Erfe	protein_coding	1	91366430	erythroferrone	40.8362	2.89264	0.663638	2.85192	0.00434567	0.140306
ENSMUSG00000037679	Inf2	protein_coding	12	112588784	inverted formin, FH2 and WH2 domain containing	3290.55	1.98566	0.346105	2.84785	0.00440151	0.14188
ENSMUSG00000017417	Plxdc1	protein_coding	11	97923238	plexin domain containing 1	38.3688	-2.36888	0.480944	-2.84624	0.00442386	0.142406
ENSMUSG00000085183	Gm12603	lincRNA	4	89050308	predicted gene 12603	8.86271	5.12895	1.45083	2.84592	0.00442827	0.142464
ENSMUSG00000038742	Angptl6	protein_coding	9	20873808	angiopoietin-like 6	37.4022	-2.08616	0.381745	-2.84526	0.00443752	0.1427
ENSMUSG00000086111	Gm15326	lincRNA	13	111867936	predicted gene 15326	5.80192	4.75372	1.32322	2.8368	0.00455678	0.145792
ENSMUSG00000068893	Sprr2a2	protein_coding	3	92215920	small proline-rich protein 2A2	3349.42	3.38607	0.841482	2.83555	0.00457464	0.146265
ENSMUSG00000033952	Aspm	protein_coding	1	139454772	asp (abnormal spindle)-like, microcephaly associated (Drosophila)	234.071	2.85774	0.65613	2.83136	0.00463504	0.147598
ENSMUSG00000009633	G0s2	protein_coding	1	193272161	G0/G1 switch gene 2	31.5239	-2.26524	0.446923	-2.831	0.00464023	0.147713
ENSMUSG00000029075	Tnfrsf4	protein_coding	4	156013843	tumor necrosis factor receptor superfamily, member 4	68.6594	2.33417	0.472028	2.82647	0.00470638	0.149668
ENSMUSG00000061397	Krt79	protein_coding	15	101929332	keratin 79	773.886	3.17854	0.773414	2.81678	0.00485072	0.153586
ENSMUSG00000074813	Gm14005	lincRNA	2	128178319	predicted gene 14005	49.5893	2.2822	0.456096	2.81125	0.00493501	0.155995
ENSMUSG00000020330	Hmmr	protein_coding	11	40701395	hyaluronan mediated motility receptor (RHAMM)	346.363	2.36834	0.488933	2.79863	0.00513197	0.161466
ENSMUSG00000041498	Kif14	protein_coding	1	136466343	kinesin family member 14	144.203	2.98304	0.708622	2.79845	0.00513485	0.161503
ENSMUSG00000039055	Eme1	protein_coding	11	94644996	essential meiotic structure-specific endonuclease 1	41.0838	3.02284	0.72326	2.79684	0.00516052	0.162256
ENSMUSG00000031379	Pir	protein_coding	X	164269371	pirin	1248.2	2.00245	0.358493	2.7963	0.00516912	0.162473
ENSMUSG00000028480	Glipr2	protein_coding	4	43957401	GLI pathogenesis-related 2	457.756	-2.17994	0.422602	-2.79208	0.00523697	0.164289
ENSMUSG00000031821	Gins2	protein_coding	8	120578633	GINS complex subunit 2 (Psf2 homolog)	121.513	2.4156	0.507174	2.79114	0.00525221	0.164592
ENSMUSG00000029869	Ephb6	protein_coding	6	41605482	Eph receptor B6	239.391	-2.10652	0.396671	-2.7895	0.00527889	0.165138
ENSMUSG00000068323	Slc4a5	protein_coding	6	83219828	solute carrier family 4, sodium bicarbonate cotransporter, member 5	524.916	-1.8702	0.313032	-2.7799	0.00543754	0.169838
ENSMUSG00000010142	Tnfrsf13b	protein_coding	11	61126755	tumor necrosis factor receptor superfamily, member 13b	15.6072	-2.343	0.483738	-2.77629	0.00549834	0.171398
ENSMUSG00000033174	Mgll	protein_coding	6	88724412	monoglyceride lipase	186.382	-2.10941	0.399654	-2.77593	0.00550436	0.171472
ENSMUSG00000073555	Gm4951	protein_coding	18	60212080	predicted gene 4951	152.043	2.86806	0.673298	2.77449	0.00552888	0.172123
ENSMUSG00000046637	Ttc34	protein_coding	4	154837459	tetratricopeptide repeat domain 34	10.7807	-2.57226	0.566716	-2.77434	0.0055314	0.172144
ENSMUSG00000097248	Gm2694	lincRNA	8	87460469	predicted gene 2694	60.2552	4.2059	1.15923	2.76554	0.00568294	0.176166
ENSMUSG00000019278	Dpep1	protein_coding	8	123186242	dipeptidase 1 (renal)	22.9041	-2.5627	0.565375	-2.76401	0.00570963	0.176819
ENSMUSG00000038811	Gngt2	protein_coding	11	95837216	guanine nucleotide binding protein (G protein), gamma transducing activity polypeptide 2	85.1307	-2.3019	0.471769	-2.75961	0.00578696	0.17872
ENSMUSG00000000903	Vpreb3	protein_coding	10	75943057	pre-B lymphocyte gene 3	13.8948	-2.90036	0.690125	-2.75364	0.00589358	0.181624
ENSMUSG00000020122	Egfr	protein_coding	11	16752203	epidermal growth factor receptor	388.956	-1.85416	0.310359	-2.75215	0.00592048	0.182394
ENSMUSG00000030278	Cidec	protein_coding	6	113424634	cell death-inducing DFFA-like effector c	36.3165	-2.51217	0.550018	-2.7493	0.00597225	0.183869
ENSMUSG00000036264	Fstl4	protein_coding	11	52764634	follistatin-like 4	247.239	2.4744	0.53704	2.74543	0.00604319	0.18545
ENSMUSG00000033453	Adamts15	protein_coding	9	30899155	a disintegrin-like and metallopeptidase (reprolysin type) with thrombospondin type 1 motif, 15	105.999	-1.93974	0.342368	-2.74483	0.00605429	0.18555
ENSMUSG00000047534	Mis18bp1	protein_coding	12	65132734	MIS18 binding protein 1	85.3137	2.17905	0.4307	2.73751	0.00619069	0.189118
ENSMUSG00000019214	Chtf18	protein_coding	17	25718926	CTF18, chromosome transmission fidelity factor 18	131.16	2.41458	0.516933	2.73649	0.00620992	0.189583
ENSMUSG00000111202	AC153954.3	lincRNA	10	50425044		2405.95	3.81827	1.03086	2.73389	0.00625902	0.190897
ENSMUSG00000026646	Suv39h2	protein_coding	2	3455815	suppressor of variegation 3-9 homolog 2 (Drosophila)	40.4534	2.47219	0.538585	2.73343	0.00626776	0.191102
ENSMUSG00000025574	Tk1	protein_coding	11	117815526	thymidine kinase 1	462.662	2.28581	0.47127	2.7284	0.00636424	0.193732
ENSMUSG00000038949	Cnst	protein_coding	1	179546370	consortin, connexin sorting protein	1443.76	-1.32858	0.120505	-2.72671	0.00639689	0.194475
ENSMUSG00000060780	Lrrtm1	protein_coding	6	77242689	leucine rich repeat transmembrane neuronal 1	6.08881	-2.67253	0.616035	-2.71498	0.00662788	0.20111
ENSMUSG00000005373	Mlxipl	protein_coding	5	135089890	MLX interacting protein-like	90.8754	-2.23151	0.454122	-2.71186	0.00669076	0.202401
ENSMUSG00000072980	Oip5	protein_coding	2	119609512	Opa interacting protein 5	52.8579	2.35612	0.500048	2.71198	0.00668835	0.202401
ENSMUSG00000024659	Anxa1	protein_coding	19	20373428	annexin A1	18919.8	1.79092	0.291698	2.71142	0.00669951	0.202569
ENSMUSG00000056608	Chd9	protein_coding	8	90828352	chromodomain helicase DNA binding protein 9	11012.7	4.07186	1.1333	2.71056	0.00671696	0.202902
ENSMUSG00000027379	Bub1	protein_coding	2	127801122	BUB1, mitotic checkpoint serine/threonine kinase	182.039	2.71663	0.633795	2.7085	0.0067589	0.204039
ENSMUSG00000020377	Ltc4s	protein_coding	11	50236461	leukotriene C4 synthase	75.5287	-2.09889	0.405932	-2.70707	0.00678794	0.20472
ENSMUSG00000027927	Lelp1	protein_coding	3	92134997	late cornified envelope-like proline-rich 1	8.85904	3.65113	0.980119	2.70491	0.00683232	0.205796
ENSMUSG00000059632	Krtap8-1	protein_coding	16	89487374	keratin associated protein 8-1	2.15282	-4.27961	1.21265	-2.70451	0.00684052	0.205977
ENSMUSG00000110206	Flt3l	protein_coding	7	45129788	FMS-like tyrosine kinase 3 ligand	193.929	-2.55703	0.577895	-2.69432	0.00705333	0.211578
ENSMUSG00000040809	Chil3	protein_coding	3	106147554	chitinase-like 3	10467.8	-2.72827	0.642928	-2.68812	0.00718553	0.214998
ENSMUSG00000039774	Galnt12	protein_coding	4	47091909	UDP-N-acetyl-alpha-D-galactosamine:polypeptide N-acetylgalactosaminyltransferase 12	502.328	1.68169	0.253759	2.68637	0.00722333	0.216061
ENSMUSG00000074272	Ceacam1	protein_coding	7	25461707	carcinoembryonic antigen-related cell adhesion molecule 1	10559	1.84019	0.314442	2.67202	0.0075397	0.22453
ENSMUSG00000048582	Gja3	protein_coding	14	57034460	gap junction protein, alpha 3	320.821	3.19903	0.823734	2.66959	0.00759439	0.226088
ENSMUSG00000053519	Kcnip1	protein_coding	11	33629339	Kv channel-interacting protein 1	31.5846	2.97241	0.740671	2.663	0.00774465	0.229838
ENSMUSG00000027227	Sord	protein_coding	2	122234749	sorbitol dehydrogenase	1159.84	-1.98309	0.369185	-2.66286	0.00774804	0.229867
ENSMUSG00000041930	Fam222a	protein_coding	5	114568016	family with sequence similarity 222, member A	170.745	-1.7379	0.277521	-2.6589	0.00783957	0.232146
ENSMUSG00000021950	Anxa8	protein_coding	14	34085981	annexin A8	460.114	4.42248	1.28883	2.65549	0.00791926	0.234359
ENSMUSG00000028307	Aldob	protein_coding	4	49535995	aldolase B, fructose-bisphosphate	21.072	-4.14079	1.18284	-2.65529	0.00792398	0.234425
ENSMUSG00000045551	Fpr1	protein_coding	17	17876471	formyl peptide receptor 1	43.4316	-2.59427	0.602777	-2.64487	0.00817227	0.240867
ENSMUSG00000003411	Rab3b	protein_coding	4	108879063	RAB3B, member RAS oncogene family	295.086	3.20776	0.83506	2.64384	0.00819719	0.241526
ENSMUSG00000113769	AC132623.2	lincRNA	12	111941991		100.004	1.75673	0.286501	2.64129	0.00825913	0.243048
ENSMUSG00000026196	Bard1	protein_coding	1	71027498	BRCA1 associated RING domain 1	61.3635	2.30403	0.493918	2.64017	0.00828648	0.243777
ENSMUSG00000050931	Sgms2	protein_coding	3	131318985	sphingomyelin synthase 2	1040.28	2.0844	0.411472	2.63543	0.0084032	0.246904
ENSMUSG00000009378	Slc16a12	protein_coding	19	34668403	solute carrier family 16 (monocarboxylic acid transporters), member 12	817.657	1.65747	0.250098	2.62883	0.00856781	0.251195
ENSMUSG00000021697	Depdc1b	protein_coding	13	108316332	DEP domain containing 1B	47.7441	2.70893	0.65098	2.62516	0.00866074	0.253243
ENSMUSG00000029553	Tfec	protein_coding	6	16833373	transcription factor EC	53.6578	-2.408	0.537208	-2.62095	0.0087685	0.256048
ENSMUSG00000051220	Ercc6l	protein_coding	X	102141716	excision repair cross-complementing rodent repair deficiency complementation group 6 like	126.485	2.03664	0.395976	2.61793	0.00884654	0.257929
ENSMUSG00000056553	Ptprn2	protein_coding	12	116485720	protein tyrosine phosphatase, receptor type, N polypeptide 2	1651.94	2.03461	0.395869	2.61352	0.00896137	0.260875
ENSMUSG00000059791	Nrm	protein_coding	17	35861318	nurim (nuclear envelope membrane protein)	212.931	2.0834	0.414955	2.61089	0.00903064	0.262649
ENSMUSG00000029797	Sspo	protein_coding	6	48448229	SCO-spondin	32.9675	-2.54488	0.592134	-2.609	0.00908067	0.264023
ENSMUSG00000026825	Dnm1	protein_coding	2	32308471	dynamin 1	250.519	2.28599	0.492951	2.60876	0.0090872	0.264051
ENSMUSG00000019876	Pkib	protein_coding	10	57631981	protein kinase inhibitor beta, cAMP dependent, testis specific	394.445	1.9002	0.34571	2.60392	0.00921632	0.266901
ENSMUSG00000048349	Pou4f1	protein_coding	14	104461676	POU domain, class 4, transcription factor 1	18.1517	-1.96069	0.369581	-2.59941	0.00933854	0.26978
ENSMUSG00000028348	Cavin4	protein_coding	4	48663514	caveolae associated 4	13.645	4.0509	1.17375	2.59928	0.00934201	0.269798
ENSMUSG00000036158	Prickle1	protein_coding	15	93499114	prickle planar cell polarity protein 1	59.9728	-1.75772	0.292311	-2.59217	0.00953725	0.275017
ENSMUSG00000024222	Fkbp5	protein_coding	17	28399095	FK506 binding protein 5	1621.98	2.52703	0.589428	2.59069	0.00957842	0.276036
ENSMUSG00000047702	Olfr1388	protein_coding	11	49436624	olfactory receptor 1388	19.3369	2.72008	0.665149	2.58601	0.00970953	0.279134
ENSMUSG00000018381	Abi3	protein_coding	11	95830074	ABI gene family, member 3	56.2742	-2.53417	0.593494	-2.58499	0.00973825	0.27979
ENSMUSG00000028671	Gale	protein_coding	4	135963727	galactose-4-epimerase, UDP	922.051	1.54938	0.212579	2.58438	0.00975555	0.280174
ENSMUSG00000031886	Ces2e	protein_coding	8	104926260	carboxylesterase 2E	9.91176	-3.43344	0.942954	-2.58066	0.00986123	0.282637
ENSMUSG00000052854	Nrk	protein_coding	X	138914430	Nik related kinase	54.1264	2.28082	0.496576	2.57931	0.00989984	0.283657
ENSMUSG00000048216	Gpr85	protein_coding	6	13834458	G protein-coupled receptor 85	60.7337	2.31921	0.511539	2.5789	0.00991165	0.28391
ENSMUSG00000029283	Cdc7	protein_coding	5	106964322	cell division cycle 7 (S. cerevisiae)	94.3124	2.21989	0.475086	2.56773	0.0102368	0.291634
ENSMUSG00000024737	Slc15a3	protein_coding	19	10839727	solute carrier family 15, member 3	189.959	-2.50721	0.587204	-2.56675	0.0102657	0.292371
ENSMUSG00000020212	Mdm1	protein_coding	10	118141811	transformed mouse 3T3 cell double minute 1	244.416	-1.87386	0.340666	-2.56515	0.0103132	0.293457
ENSMUSG00000110626	Gm45805	lincRNA	8	126755571	predicted gene 45805	32.6895	2.62108	0.63211	2.56455	0.0103309	0.293786
ENSMUSG00000040899	Ccr6	protein_coding	17	8236043	chemokine (C-C motif) receptor 6	11.3359	-2.45748	0.568778	-2.56248	0.0103927	0.295276
ENSMUSG00000028581	Laptm5	protein_coding	4	130913125	lysosomal-associated protein transmembrane 5	883.246	-2.40212	0.548251	-2.55745	0.0105443	0.299133
ENSMUSG00000028691	Prdx1	protein_coding	4	116685544	peroxiredoxin 1	23941.1	1.30661	0.119895	2.55733	0.010548	0.299151
ENSMUSG00000006529	Itih1	protein_coding	14	30929180	inter-alpha trypsin inhibitor, heavy chain 1	121.628	-2.48369	0.580357	-2.55651	0.0105728	0.299522
ENSMUSG00000059401	Mamld1	protein_coding	X	71050256	mastermind-like domain containing 1	220.453	-1.57617	0.225378	-2.55648	0.0105738	0.299522
ENSMUSG00000022512	Cldn1	protein_coding	16	26356642	claudin 1	20.6483	-2.13655	0.444742	-2.55552	0.010603	0.300011
ENSMUSG00000045930	Clec14a	protein_coding	12	58264720	C-type lectin domain family 14, member a	52.1781	-1.99326	0.388857	-2.55431	0.0106399	0.300674
ENSMUSG00000050164	Mchr1	protein_coding	15	81235499	melanin-concentrating hormone receptor 1	2.85083	5.14791	1.62965	2.54527	0.0109193	0.306739
ENSMUSG00000018819	Lsp1	protein_coding	7	142460809	lymphocyte specific 1	354.596	-2.40558	0.554247	-2.53602	0.0112119	0.314026
ENSMUSG00000049303	Syt12	protein_coding	19	4445908	synaptotagmin XII	544.624	1.8688	0.342707	2.5351	0.0112414	0.314547
ENSMUSG00000031101	Sash3	protein_coding	X	48146436	SAM and SH3 domain containing 3	64.5962	-2.15926	0.457802	-2.53224	0.0113337	0.316501
ENSMUSG00000041954	Tnfrsf18	protein_coding	4	156026164	tumor necrosis factor receptor superfamily, member 18	140.839	1.82717	0.326972	2.5298	0.0114129	0.318148
ENSMUSG00000035020	Epgn	protein_coding	5	91027464	epithelial mitogen	129.862	2.40896	0.558223	2.524	0.0116027	0.3223
ENSMUSG00000020121	Srgap1	protein_coding	10	121780991	SLIT-ROBO Rho GTPase activating protein 1	526.057	1.47619	0.188779	2.52245	0.0116539	0.323439
ENSMUSG00000025176	Hoga1	protein_coding	19	42045610	4-hydroxy-2-oxoglutarate aldolase 1	310.46	2.78395	0.708014	2.51966	0.0117469	0.325732
ENSMUSG00000063646	Jakmip1	protein_coding	5	37028335	janus kinase and microtubule interacting protein 1	275.228	-2.37751	0.547248	-2.51715	0.0118309	0.327294
ENSMUSG00000041794	Myrip	protein_coding	9	120301513	myosin VIIA and Rab interacting protein	15.7042	2.59302	0.633029	2.51651	0.0118525	0.327795
ENSMUSG00000042626	Shc1	protein_coding	3	89418443	src homology 2 domain-containing transforming protein C1	6622.9	1.41053	0.163388	2.51263	0.0119835	0.331034
ENSMUSG00000056145	AI504432	lincRNA	3	107039504	expressed sequence AI504432	43.3443	-2.32771	0.529453	-2.5077	0.0121519	0.335001
ENSMUSG00000030047	Arhgap25	protein_coding	6	87458545	Rho GTPase activating protein 25	83.1445	-2.35469	0.540295	-2.50732	0.0121652	0.33527
ENSMUSG00000027375	Mal	protein_coding	2	127633226	myelin and lymphocyte protein, T cell differentiation protein	16131.6	1.71198	0.283984	2.50712	0.0121718	0.335355
ENSMUSG00000017146	Brca1	protein_coding	11	101488764	breast cancer 1, early onset	195.307	2.13875	0.454247	2.5069	0.0121797	0.335473
ENSMUSG00000052496	Pkdrej	protein_coding	15	85814676	polycystin (PKD) family receptor for egg jelly	13.4576	-2.47136	0.587207	-2.5057	0.0122211	0.336351
ENSMUSG00000024301	Kifc5b	protein_coding	17	26917091	kinesin family member C5B	71.2299	2.304	0.521129	2.50227	0.0123401	0.339003
ENSMUSG00000054582	Pabpc1l	protein_coding	2	164025450	poly(A) binding protein, cytoplasmic 1-like	18.2804	2.467	0.586833	2.49985	0.0124244	0.341122
ENSMUSG00000074006	Omp	protein_coding	7	98143359	olfactory marker protein	83.7533	1.74129	0.296678	2.49865	0.0124667	0.341986
ENSMUSG00000027611	Procr	protein_coding	2	155751117	protein C receptor, endothelial	553.48	2.26751	0.507505	2.49753	0.0125061	0.342411
ENSMUSG00000074796	Slc4a11	protein_coding	2	130684113	solute carrier family 4, sodium bicarbonate transporter-like, member 11	100.111	1.84994	0.340977	2.49267	0.0126785	0.346389
ENSMUSG00000005054	Cstb	protein_coding	10	78425669	cystatin B	3463.6	1.43654	0.175151	2.49236	0.0126898	0.346598
ENSMUSG00000027314	Dll4	protein_coding	2	119325784	delta-like 4 (Drosophila)	245.24	-1.84806	0.340458	-2.49094	0.0127405	0.347781
ENSMUSG00000026420	Il24	protein_coding	1	130882074	interleukin 24	21.1879	2.872	0.753063	2.48585	0.0129243	0.352089
ENSMUSG00000034773	BC030867	protein_coding	11	102248882	cDNA sequence BC030867	45.6414	2.19495	0.481005	2.48428	0.0129814	0.353442
ENSMUSG00000021792	Fam213a	protein_coding	14	40993740	family with sequence similarity 213, member A	7463.13	1.51746	0.20843	2.48265	0.0130409	0.354856
ENSMUSG00000044252	Osbpl1a	protein_coding	18	12755314	oxysterol binding protein-like 1A	545.203	-1.59793	0.241019	-2.48084	0.0131074	0.356357
ENSMUSG00000019843	Fyn	protein_coding	10	39368855	Fyn proto-oncogene	63.9507	-2.01231	0.408156	-2.4802	0.013131	0.356897
ENSMUSG00000051435	Fhad1	protein_coding	4	141890438	forkhead-associated (FHA) phosphopeptide binding domain 1	46.5589	-2.67677	0.679041	-2.46932	0.0135369	0.366667
ENSMUSG00000111694	AC122395.3	lincRNA	9	27553480		1.56866	-4.17835	1.28866	-2.4664	0.013648	0.369041
ENSMUSG00000002835	Chaf1a	protein_coding	17	56040416	chromatin assembly factor 1, subunit A (p150)	313.027	2.01595	0.412756	2.46138	0.0138405	0.373287
ENSMUSG00000019982	Myb	protein_coding	10	21124935	myeloblastosis oncogene	103.082	-3.81319	1.14445	-2.4581	0.0139673	0.376491
ENSMUSG00000048899	Rimkla	protein_coding	4	119465283	ribosomal modification protein rimK-like family member A	9.09128	-3.15918	0.87844	-2.45797	0.0139726	0.376529
ENSMUSG00000029167	Ppargc1a	protein_coding	5	51454250	peroxisome proliferative activated receptor, gamma, coactivator 1 alpha	284.065	-1.67217	0.273572	-2.45703	0.0140093	0.377302
ENSMUSG00000001473	Tubb6	protein_coding	18	67390717	tubulin, beta 6 class V	487.156	1.98105	0.400615	2.44885	0.0143311	0.384501
ENSMUSG00000052117	D630039A03Rik	protein_coding	4	57908483	RIKEN cDNA D630039A03 gene	529.465	-1.87899	0.358917	-2.44901	0.014325	0.384501
ENSMUSG00000078773	Rad54b	protein_coding	4	11558922	RAD54 homolog B (S. cerevisiae)	79.3014	2.79811	0.734285	2.4488	0.0143335	0.384501
ENSMUSG00000030577	Cd22	protein_coding	7	30865402	CD22 antigen	71.1266	-2.16278	0.475301	-2.4464	0.0144292	0.38663
ENSMUSG00000026443	Lrrn2	protein_coding	1	132880273	leucine rich repeat protein 2, neuronal	5.3588	-2.91569	0.783569	-2.44482	0.0144923	0.387993
ENSMUSG00000044294	Krt84	protein_coding	15	101525026	keratin 84	6.6862	3.93053	1.19944	2.44324	0.0145559	0.389145
ENSMUSG00000030707	Coro1a	protein_coding	7	126699773	coronin, actin binding protein 1A	204.556	-2.08958	0.446331	-2.4412	0.0146384	0.390909
ENSMUSG00000075592	Nynrin	protein_coding	14	55854036	NYN domain and retroviral integrase containing	86.4459	-1.7921	0.324866	-2.43824	0.0147591	0.393132
ENSMUSG00000071719	Tmem28	protein_coding	X	99821021	transmembrane protein 28	39.2882	-2.47858	0.607195	-2.43511	0.0148875	0.396329
ENSMUSG00000025993	Slc40a1	protein_coding	1	45908068	solute carrier family 40 (iron-regulated transporter), member 1	274.666	2.3928	0.572123	2.43445	0.0149145	0.39651
ENSMUSG00000050199	Lgr4	protein_coding	2	109917647	leucine-rich repeat-containing G protein-coupled receptor 4	1048.44	-1.71346	0.293927	-2.42733	0.0152102	0.402769
ENSMUSG00000010830	Kdelr3	protein_coding	15	79516408	KDEL (Lys-Asp-Glu-Leu) endoplasmic reticulum protein retention receptor 3	396.827	1.59376	0.244762	2.42587	0.0152718	0.40406
ENSMUSG00000051515	Fam181b	protein_coding	7	93079865	family with sequence similarity 181, member B	3.66957	-3.05689	0.84834	-2.42461	0.0153249	0.405239
ENSMUSG00000039994	Timeless	protein_coding	10	128232065	timeless circadian clock 1	184.206	1.84891	0.351068	2.41809	0.0156023	0.411882
ENSMUSG00000038146	Notch3	protein_coding	17	32120820	notch 3	213.442	1.79909	0.330637	2.41682	0.0156568	0.412896
ENSMUSG00000045414	1190002N15Rik	protein_coding	9	94517864	RIKEN cDNA 1190002N15 gene	529.819	-1.66889	0.277292	-2.41222	0.0158559	0.417647
ENSMUSG00000024730	Ms4a8a	protein_coding	19	11067471	membrane-spanning 4-domains, subfamily A, member 8A	766.851	-1.79509	0.329629	-2.41207	0.0158621	0.417694
ENSMUSG00000022468	Endou	protein_coding	15	97711019	endonuclease, polyU-specific	7.67748	-2.54756	0.641843	-2.41112	0.0159038	0.418675
ENSMUSG00000087119	Atg4a-ps	protein_coding	3	103643954	autophagy related 4A, pseudogene	3.24054	4.43953	1.42813	2.40841	0.0160222	0.42109
ENSMUSG00000064267	Hvcn1	protein_coding	5	122206804	hydrogen voltage-gated channel 1	177.709	-2.52631	0.634323	-2.4062	0.0161194	0.42292
ENSMUSG00000030759	Far1	protein_coding	7	113513834	fatty acyl CoA reductase 1	4707.58	1.70702	0.293939	2.40532	0.0161584	0.423726
ENSMUSG00000062585	Cnr2	protein_coding	4	135895394	cannabinoid receptor 2 (macrophage)	44.3406	-1.82669	0.343801	-2.40457	0.0161916	0.424361
ENSMUSG00000023043	Krt18	protein_coding	15	102028216	keratin 18	51770.8	1.56177	0.234038	2.40034	0.01638	0.428746
ENSMUSG00000105353	Gm42428	lincRNA	5	44136620	predicted gene 42428	676.088	4.0972	1.29065	2.39973	0.0164073	0.429303
ENSMUSG00000050211	Pla2g4e	protein_coding	2	120166412	phospholipase A2, group IVE	17.3487	2.61919	0.67548	2.3971	0.0165256	0.431801
ENSMUSG00000015843	Rxrg	protein_coding	1	167598384	retinoid X receptor gamma	11.5691	3.16114	0.90176	2.39658	0.016549	0.432174
ENSMUSG00000024395	Lims2	protein_coding	18	31931325	LIM and senescent cell antigen like domains 2	85.8587	-2.99039	0.830611	-2.39629	0.0165619	0.432271
ENSMUSG00000019945	1700040L02Rik	protein_coding	10	68430953	RIKEN cDNA 1700040L02 gene	46.9166	-2.06344	0.445561	-2.38674	0.0169983	0.4422
ENSMUSG00000030346	Rad51ap1	protein_coding	6	126923050	RAD51 associated protein 1	80.9277	2.40299	0.588565	2.38374	0.0171377	0.445213
ENSMUSG00000020427	Igfbp3	protein_coding	11	7206086	insulin-like growth factor binding protein 3	92.3815	1.96104	0.403483	2.38186	0.0172252	0.447242
ENSMUSG00000035064	Eef2k	protein_coding	7	120842831	eukaryotic elongation factor-2 kinase	1500.08	1.57085	0.239843	2.38011	0.0173077	0.449013
ENSMUSG00000024008	Cpne5	protein_coding	17	29156550	copine V	70.9793	-1.85932	0.361232	-2.37887	0.0173656	0.449809
ENSMUSG00000027859	Ngf	protein_coding	3	102469919	nerve growth factor	59.7249	3.06207	0.867271	2.37765	0.0174234	0.451149
ENSMUSG00000101849	Gm28386	lincRNA	1	77515280	predicted gene 28386	8.59505	2.57463	0.662906	2.37535	0.0175323	0.453348
ENSMUSG00000069793	Slfn9	protein_coding	11	82978390	schlafen 9	629.202	1.80488	0.339354	2.37181	0.017701	0.457212
ENSMUSG00000018830	Myh11	protein_coding	16	14194527	myosin, heavy polypeptide 11, smooth muscle	15.5473	-1.99895	0.421213	-2.37161	0.0177106	0.457335
ENSMUSG00000074445	Sprr2a3	protein_coding	3	92285417	small proline-rich protein 2A3	398.8	3.01518	0.851099	2.36774	0.017897	0.461391
ENSMUSG00000098207	Arl14	protein_coding	3	69222419	ADP-ribosylation factor-like 14	485.595	2.45403	0.614828	2.36494	0.0180332	0.464077
ENSMUSG00000074141	Il4i1	protein_coding	7	44816387	interleukin 4 induced 1	455.129	3.29433	0.972181	2.35998	0.0182761	0.468105
ENSMUSG00000030510	Cers3	protein_coding	7	66743504	ceramide synthase 3	387.904	1.60499	0.256373	2.35981	0.0182842	0.468187
ENSMUSG00000053522	Lgals7	protein_coding	7	28863853	lectin, galactose binding, soluble 7	13.7943	4.33026	1.41231	2.35803	0.0183721	0.470056
ENSMUSG00000038059	Smim3	protein_coding	18	60474193	small integral membrane protein 3	577.38	-1.50431	0.213896	-2.35776	0.0183857	0.470277
ENSMUSG00000063060	Sox7	protein_coding	14	63943673	SRY (sex determining region Y)-box 7	35.56	-1.81284	0.344923	-2.35659	0.0184435	0.471499
ENSMUSG00000020493	Prr11	protein_coding	11	87089153	proline rich 11	146.987	2.21103	0.514198	2.35517	0.0185141	0.472863
ENSMUSG00000035355	Kcnh4	protein_coding	11	100740376	potassium voltage-gated channel, subfamily H (eag-related), member 4	8.62528	-2.80526	0.766951	-2.35382	0.0185817	0.474264
ENSMUSG00000069919	Hba-a1	protein_coding	11	32283511	hemoglobin alpha, adult chain 1	57.144	-2.50963	0.641906	-2.3518	0.0186829	0.476463
ENSMUSG00000066007	Zfp600	protein_coding	4	146156824	zinc finger protein 600	3.73568	-4.81201	1.62342	-2.34814	0.0188673	0.480259
ENSMUSG00000103897	Pcdhga8	protein_coding	18	37725706	protocadherin gamma subfamily A, 8	39.2021	-2.04753	0.446358	-2.34684	0.0189333	0.481679
ENSMUSG00000095547	Gm10719	protein_coding	9	3017408	predicted gene 10719	4.68059	4.97592	1.69854	2.34078	0.0192433	0.488581
ENSMUSG00000021904	Sema3g	protein_coding	14	31217860	sema domain, immunoglobulin domain (Ig), short basic domain, secreted, (semaphorin) 3G	39.8591	-1.7613	0.325427	-2.33939	0.0193151	0.48993
ENSMUSG00000046207	Pik3r6	protein_coding	11	68503019	phosphoinositide-3-kinase regulatory subunit 5	30.4034	-2.4299	0.611286	-2.33916	0.0193269	0.489981
ENSMUSG00000027995	Tlr2	protein_coding	3	83836272	toll-like receptor 2	317.23	-2.08513	0.464047	-2.33841	0.0193659	0.490575
ENSMUSG00000021214	Akr1c18	protein_coding	13	4132615	aldo-keto reductase family 1, member C18	1.76441	4.70462	1.58994	2.33004	0.0198038	0.499353
ENSMUSG00000031295	Phka2	protein_coding	X	160502166	phosphorylase kinase alpha 2	258.111	-2.0465	0.449085	-2.33029	0.0197909	0.499353
ENSMUSG00000052974	Cyp2f2	protein_coding	7	27119909	cytochrome P450, family 2, subfamily f, polypeptide 2	21585	-2.71369	0.735495	-2.32998	0.0198074	0.499353
ENSMUSG00000045273	Cenph	protein_coding	13	100759674	centromere protein H	58.8988	2.25772	0.541993	2.32055	0.0203113	0.509883
ENSMUSG00000109996	Gm31898	lincRNA	8	26428281	predicted gene, 31898	2.14617	4.29311	1.4197	2.31959	0.0203633	0.510917
ENSMUSG00000041782	Lad1	protein_coding	1	135818598	ladinin	6369.33	1.41936	0.18087	2.31858	0.020418	0.511883
ENSMUSG00000074623	Gm826	protein_coding	2	160311393	predicted gene 826	6.33603	3.0579	0.888666	2.31572	0.0205735	0.514828
ENSMUSG00000026594	Ralgps2	protein_coding	1	156804166	Ral GEF with PH domain and SH3 binding motif 2	1388.01	1.69402	0.299923	2.314	0.020668	0.516645
ENSMUSG00000034467	Dynlrb2	protein_coding	8	116504974	dynein light chain roadblock-type 2	41.8703	-1.74988	0.324176	-2.3132	0.0207116	0.517597
ENSMUSG00000110573	Gm5485	protein_coding	16	48399453	predicted gene 5485	18.5312	2.78972	0.775277	2.30849	0.0209721	0.523556
ENSMUSG00000034906	Ncaph	protein_coding	2	127103809	non-SMC condensin I complex, subunit H	276.88	2.17739	0.510195	2.30773	0.0210144	0.524474
ENSMUSG00000012123	Crybg2	protein_coding	4	134060815	crystallin beta-gamma domain containing 2	174.08	1.89614	0.38863	2.3059	0.0211163	0.526739
ENSMUSG00000074345	Tnfaip8l3	protein_coding	9	54023405	tumor necrosis factor, alpha-induced protein 8-like 3	25.111	-1.97044	0.420939	-2.30543	0.0211427	0.526979
ENSMUSG00000026413	Pkp1	protein_coding	1	135871395	plakophilin 1	51.8022	2.86454	0.808803	2.30531	0.0211491	0.527
ENSMUSG00000029102	Hgfac	protein_coding	5	35041509	hepatocyte growth factor activator	1458.24	1.69337	0.301001	2.30355	0.0212479	0.529094
ENSMUSG00000032113	Chek1	protein_coding	9	36708482	checkpoint kinase 1	89.6537	2.26425	0.549303	2.30156	0.0213602	0.531282
ENSMUSG00000026728	Vim	protein_coding	2	13573927	vimentin	1166.49	-2.05805	0.459993	-2.30014	0.0214405	0.5327
ENSMUSG00000047880	Cxcr5	protein_coding	9	44511787	chemokine (C-X-C motif) receptor 5	14.5181	-2.53364	0.666774	-2.30009	0.021443	0.5327
ENSMUSG00000096979	Gm26880	lincRNA	4	146509094	predicted gene, 26880	1101.64	3.37565	1.03298	2.29981	0.0214588	0.532896
ENSMUSG00000032372	Plscr2	protein_coding	9	92275602	phospholipid scramblase 2	96.9091	-1.62823	0.273799	-2.2945	0.0217619	0.539007
ENSMUSG00000091867	Cyp2a22	protein_coding	7	26931631	cytochrome P450, family 2, subfamily a, polypeptide 22	5.69643	-2.68803	0.736856	-2.29085	0.0219721	0.542792
ENSMUSG00000047638	Nr1h4	protein_coding	10	89454234	nuclear receptor subfamily 1, group H, member 4	185.41	2.29072	0.563534	2.2904	0.021998	0.543149
ENSMUSG00000036904	Fzd8	protein_coding	18	9212856	frizzled class receptor 8	439.893	-1.6271	0.274219	-2.28687	0.0222033	0.54779
ENSMUSG00000022595	Lypd2	protein_coding	15	74732247	Ly6/Plaur domain containing 2	24.7593	-2.13729	0.498029	-2.28357	0.0223965	0.55205
ENSMUSG00000025784	Clec3b	protein_coding	9	123150946	C-type lectin domain family 3, member b	31.493	-1.63771	0.279264	-2.28353	0.0223993	0.55205
ENSMUSG00000023031	Cela1	protein_coding	15	100674425	chymotrypsin-like elastase family, member 1	372.242	2.05224	0.460955	2.28275	0.0224452	0.552894
ENSMUSG00000072949	Acot1	protein_coding	12	84009490	acyl-CoA thioesterase 1	1262.54	-2.30707	0.573222	-2.28021	0.022595	0.55586
ENSMUSG00000030087	Klf15	protein_coding	6	90462576	Kruppel-like factor 15	384.722	-2.3583	0.597038	-2.27507	0.022902	0.562096
ENSMUSG00000095788	Sirpb1a	protein_coding	3	15371653	signal-regulatory protein beta 1A	24.2772	-2.45414	0.639391	-2.27425	0.0229507	0.563
ENSMUSG00000032231	Anxa2	protein_coding	9	69453620	annexin A2	29198	1.39676	0.174487	2.27386	0.0229742	0.563431
ENSMUSG00000047798	Cd300lf	protein_coding	11	115116214	CD300 molecule like family member F	193.219	-1.9931	0.437563	-2.26962	0.0232306	0.568847
ENSMUSG00000100798	Gm19589	lincRNA	1	88551517	predicted gene, 19589	14.7807	2.37213	0.604564	2.26961	0.0232311	0.568847
ENSMUSG00000027863	Cd2	protein_coding	3	101275899	CD2 antigen	66.9443	-2.32647	0.584717	-2.26856	0.0232948	0.570111
ENSMUSG00000030693	Klk10	protein_coding	7	43781035	kallikrein related-peptidase 10	21.2549	2.12969	0.499385	2.26216	0.0236874	0.577915
ENSMUSG00000030946	Lhpp	protein_coding	7	132610638	phospholysine phosphohistidine inorganic pyrophosphate phosphatase	144.183	-1.43035	0.190245	-2.26207	0.0236931	0.577915
ENSMUSG00000033031	C330027C09Rik	protein_coding	16	48994185	RIKEN cDNA C330027C09 gene	245.669	2.00212	0.443852	2.25777	0.0239599	0.583523
ENSMUSG00000030934	Oat	protein_coding	7	132557478	ornithine aminotransferase	4647.65	-1.63898	0.283049	-2.2575	0.023977	0.583787
ENSMUSG00000030492	Slc7a9	protein_coding	7	35448796	solute carrier family 7 (cationic amino acid transporter, y+ system), member 9	15.0083	-2.98422	0.879487	-2.25612	0.0240633	0.585437
ENSMUSG00000054320	Lrrc36	protein_coding	8	105413571	leucine rich repeat containing 36	3.02049	-3.34126	1.03887	-2.25367	0.0242171	0.588876
ENSMUSG00000020335	Zfp354b	protein_coding	11	50921823	zinc finger protein 354B	15.5943	-1.99137	0.440453	-2.25078	0.0243992	0.593152
ENSMUSG00000024795	Kif20b	protein_coding	19	34922361	kinesin family member 20B	292.197	1.77349	0.344	2.2485	0.0245442	0.596065
ENSMUSG00000035778	Ggta1	protein_coding	2	35400179	glycoprotein galactosyltransferase alpha 1, 3	157.895	-1.80218	0.35681	-2.24819	0.0245644	0.596249
ENSMUSG00000037653	Kctd8	protein_coding	5	69109285	potassium channel tetramerisation domain containing 8	5.55988	-2.97798	0.880622	-2.24611	0.0246969	0.599157
ENSMUSG00000046591	Ticrr	protein_coding	7	79660196	TOPBP1-interacting checkpoint and replication regulator	111.16	1.81531	0.363112	2.24533	0.0247472	0.600223
ENSMUSG00000052212	Cd177	protein_coding	7	24743983	CD177 antigen	2301.66	3.71069	1.20825	2.24348	0.0248657	0.601711
ENSMUSG00000027895	Kcnc4	protein_coding	3	107438303	potassium voltage gated channel, Shaw-related subfamily, member 4	30.0103	2.69529	0.756297	2.24157	0.0249892	0.604236
ENSMUSG00000024424	Ttc39c	protein_coding	18	12599926	tetratricopeptide repeat domain 39C	39.4312	-2.1518	0.514427	-2.23899	0.0251567	0.607974
ENSMUSG00000040605	Bace2	protein_coding	16	97356728	beta-site APP-cleaving enzyme 2	4380.37	2.14867	0.513063	2.23884	0.0251663	0.608051
ENSMUSG00000002992	Apoc2	protein_coding	7	19671579	apolipoprotein C-II	106.212	2.96649	0.879252	2.23655	0.0253156	0.611191
ENSMUSG00000021579	Lrrc14b	protein_coding	13	74359578	leucine rich repeat containing 14B	3.48622	-5.42194	1.97777	-2.23582	0.0253635	0.612036
ENSMUSG00000094430	Gm933	protein_coding	16	32804760	predicted gene 933	272.468	1.86061	0.385059	2.235	0.0254174	0.612868
ENSMUSG00000042303	Sgsm3	protein_coding	15	80977765	small G protein signaling modulator 3	5263.75	1.64853	0.290235	2.2345	0.0254503	0.61319
ENSMUSG00000031173	Otc	protein_coding	X	10252305	ornithine transcarbamylase	13.9411	3.13501	0.956114	2.23301	0.0255485	0.615135
ENSMUSG00000031262	Cenpi	protein_coding	X	134308084	centromere protein I	88.6687	1.99588	0.44599	2.23298	0.0255505	0.615135
ENSMUSG00000022598	Psca	protein_coding	15	74714839	prostate stem cell antigen	14888.7	3.07807	0.932156	2.22932	0.0257929	0.619668
ENSMUSG00000025075	Habp2	protein_coding	19	56287137	hyaluronic acid binding protein 2	252.462	3.63539	1.1834	2.22697	0.0259495	0.622683
ENSMUSG00000030866	Ern2	protein_coding	7	122169893	endoplasmic reticulum (ER) to nucleus signalling 2	2822.01	2.47793	0.665439	2.22099	0.0263518	0.63003
ENSMUSG00000014361	Mertk	protein_coding	2	128698956	c-mer proto-oncogene tyrosine kinase	215.677	-1.72982	0.328963	-2.21855	0.0265172	0.632774
ENSMUSG00000033061	Resp18	protein_coding	1	75272199	regulated endocrine-specific protein 18	6.08139	4.84297	1.73757	2.2117	0.0269875	0.643025
ENSMUSG00000042417	Ccno	protein_coding	13	112987802	cyclin O	53.6386	-2.05166	0.475526	-2.21156	0.0269968	0.643085
ENSMUSG00000096054	Syne1	protein_coding	10	5020917	spectrin repeat containing, nuclear envelope 1	176.079	-1.38295	0.173243	-2.21048	0.0270717	0.644621
ENSMUSG00000034112	Atp2c2	protein_coding	8	119700009	ATPase, Ca++ transporting, type 2C, member 2	620.182	2.10623	0.500746	2.20916	0.0271635	0.646024
ENSMUSG00000019122	Ccl9	protein_coding	11	83572919	chemokine (C-C motif) ligand 9	197.608	-2.30217	0.59022	-2.20625	0.0273664	0.649762
ENSMUSG00000005470	Asf1b	protein_coding	8	83955507	anti-silencing function 1B histone chaperone	198.168	1.99833	0.452733	2.20511	0.0274461	0.651166
ENSMUSG00000037902	Sirpa	protein_coding	2	129592835	signal-regulatory protein alpha	733.628	-2.14067	0.518296	-2.20082	0.0277491	0.65753
ENSMUSG00000054690	Emcn	protein_coding	3	137341067	endomucin	36.7569	-2.03091	0.468443	-2.20071	0.0277568	0.657539
ENSMUSG00000043461	Sptssb	protein_coding	3	69819542	serine palmitoyltransferase, small subunit B	2986.92	2.06271	0.482966	2.20038	0.0277801	0.657605
ENSMUSG00000020053	Igf1	protein_coding	10	87858265	insulin-like growth factor 1	120.513	-2.54525	0.702567	-2.19943	0.0278473	0.658866
ENSMUSG00000017491	Rarb	protein_coding	14	16430839	retinoic acid receptor, beta	59.3174	-2.1961	0.544589	-2.19635	0.0280672	0.662911
ENSMUSG00000047562	Mmp10	protein_coding	9	7502352	matrix metallopeptidase 10	7.07556	2.94269	0.886201	2.19216	0.0283679	0.668677
ENSMUSG00000034810	Scn7a	protein_coding	2	66673425	sodium channel, voltage-gated, type VII, alpha	92.509	-2.06539	0.486488	-2.18995	0.0285276	0.671623
ENSMUSG00000026748	Plxdc2	protein_coding	2	16356304	plexin domain containing 2	49.1546	-1.90909	0.415141	-2.18983	0.0285369	0.671656
ENSMUSG00000090700	Cyp4f40	protein_coding	17	32659410	cytochrome P450, family 4, subfamily f, polypeptide 40	8.26009	3.87195	1.31231	2.18848	0.0286348	0.673424
ENSMUSG00000002588	Pon1	protein_coding	6	5168090	paraoxonase 1	18.9807	-1.9141	0.418106	-2.18629	0.0287943	0.676201
ENSMUSG00000034898	Filip1	protein_coding	9	79815051	filamin A interacting protein 1	1043.4	2.1524	0.52716	2.18606	0.0288115	0.676419
ENSMUSG00000113495	CT573034.3	lincRNA	13	62336463		41.1934	1.76296	0.349028	2.18597	0.0288179	0.676419
ENSMUSG00000030731	Syt3	protein_coding	7	44384102	synaptotagmin III	48.1703	-1.72306	0.33111	-2.18373	0.0289819	0.679342
ENSMUSG00000048387	Osr1	protein_coding	12	9570116	odd-skipped related 1 (Drosophila)	6.09221	-2.6144	0.740332	-2.18064	0.0292102	0.683792
ENSMUSG00000110386	Gm42031	lincRNA	8	85125872	predicted gene, 42031	4169.5	3.31644	1.06228	2.18062	0.0292115	0.683792
ENSMUSG00000097353	A430046D13Rik	lincRNA	10	128499364	Riken cDNA A430046D13 gene	59.4937	-1.48903	0.225223	-2.17131	0.0299075	0.697327
ENSMUSG00000048865	Arhgap30	protein_coding	1	171388954	Rho GTPase activating protein 30	147.714	-1.79698	0.367445	-2.16897	0.0300846	0.70083
ENSMUSG00000028238	Atp6v0d2	protein_coding	4	19876841	ATPase, H+ transporting, lysosomal V0 subunit D2	510.591	-1.99619	0.459523	-2.16789	0.0301672	0.701996
ENSMUSG00000048834	Vstm2a	protein_coding	11	16257724	V-set and transmembrane domain containing 2A	9.93407	-2.72619	0.797972	-2.16322	0.030524	0.708559
ENSMUSG00000029193	Cckar	protein_coding	5	53697776	cholecystokinin A receptor	72.3086	-2.48114	0.685036	-2.16213	0.030608	0.710247
ENSMUSG00000079057	Cyp4v3	protein_coding	8	45304944	cytochrome P450, family 4, subfamily v, polypeptide 3	643.789	-1.91577	0.423575	-2.16201	0.0306177	0.710247
ENSMUSG00000035435	Abca17	protein_coding	17	24264259	ATP-binding cassette, sub-family A (ABC1), member 17	27.9751	-1.82486	0.381788	-2.16051	0.0307334	0.71237
ENSMUSG00000044405	Adig	protein_coding	2	158502612	adipogenin	13.8034	-1.95941	0.444281	-2.15948	0.0308133	0.713697
ENSMUSG00000045392	Olfr1033	protein_coding	2	86020633	olfactory receptor 1033	538.76	1.91898	0.426123	2.1566	0.031037	0.717692
ENSMUSG00000032816	Igdcc4	protein_coding	9	65101486	immunoglobulin superfamily, DCC subclass, member 4	652.371	1.9217	0.427543	2.15581	0.0310986	0.718547
ENSMUSG00000028521	Slc35d1	protein_coding	4	103170649	solute carrier family 35 (UDP-glucuronic acid/UDP-N-acetylgalactosamine dual transporter), member D1	1167.42	1.61173	0.283895	2.15478	0.0311789	0.719877
ENSMUSG00000020160	Meis1	protein_coding	11	18879817	Meis homeobox 1	15.9546	-1.86708	0.402642	-2.15347	0.031282	0.721553
ENSMUSG00000030579	Tyrobp	protein_coding	7	30413760	TYRO protein tyrosine kinase binding protein	414.765	-2.08049	0.502258	-2.15126	0.0314555	0.724677
ENSMUSG00000021457	Syk	protein_coding	13	52583173	spleen tyrosine kinase	287.512	-1.75569	0.351319	-2.15102	0.0314746	0.724935
ENSMUSG00000007080	Pole	protein_coding	5	110286306	polymerase (DNA directed), epsilon	237.067	1.85823	0.399429	2.14864	0.0316629	0.728386
ENSMUSG00000039187	Fanci	protein_coding	7	79391929	Fanconi anemia, complementation group I	98.3157	2.02954	0.47933	2.14787	0.0317237	0.729429
ENSMUSG00000029084	Cd38	protein_coding	5	43868553	CD38 antigen	1299.34	2.11401	0.518738	2.14755	0.0317495	0.729845
ENSMUSG00000028359	Orm3	protein_coding	4	63356162	orosomucoid 3	45.8371	3.63383	1.22668	2.14713	0.031783	0.730437
ENSMUSG00000101705	Gm28380	lincRNA	1	91611406	predicted gene 28380	3.72546	3.85276	1.32959	2.1456	0.0319051	0.732532
ENSMUSG00000112500	AC160146.1	lincRNA	10	117925459		5.30905	-2.50376	0.701924	-2.14234	0.0321659	0.737446
ENSMUSG00000030254	Rad18	protein_coding	6	112619850	RAD18 E3 ubiquitin protein ligase	115.222	1.94458	0.440962	2.14208	0.0321869	0.73757
ENSMUSG00000089901	Gm8113	protein_coding	14	43925390	predicted gene 8113	772.031	2.78387	0.832896	2.14177	0.0322123	0.737796
ENSMUSG00000018008	Cyth4	protein_coding	15	78597047	cytohesin 4	178.093	-2.04034	0.48587	-2.14118	0.0322595	0.738699
ENSMUSG00000054728	Phactr1	protein_coding	13	42680623	phosphatase and actin regulator 1	247.531	-2.44631	0.675584	-2.14083	0.0322874	0.739157
ENSMUSG00000041219	Arhgap11a	protein_coding	2	113831492	Rho GTPase activating protein 11A	896.09	1.94859	0.443679	2.13801	0.0325163	0.743499
ENSMUSG00000031780	Ccl17	protein_coding	8	94810453	chemokine (C-C motif) ligand 17	14.5847	-2.46114	0.683777	-2.13686	0.0326093	0.745085
ENSMUSG00000026430	Rassf5	protein_coding	1	131176410	Ras association (RalGDS/AF-6) domain family member 5	125.108	-1.58359	0.27315	-2.13653	0.0326359	0.745172
ENSMUSG00000021676	Iqgap2	protein_coding	13	95627177	IQ motif containing GTPase activating protein 2	4254.61	2.0419	0.48809	2.13465	0.0327895	0.748299
ENSMUSG00000051682	Treml4	protein_coding	17	48264295	triggering receptor expressed on myeloid cells-like 4	11.5722	-2.23805	0.581171	-2.13026	0.03315	0.755252
ENSMUSG00000079105	C7	protein_coding	15	4988762	complement component 7	16.2677	-2.28003	0.601587	-2.12775	0.0333577	0.758887
ENSMUSG00000094091	Gm21885	protein_coding	11	94281873	predicted gene, 21885	18.3708	2.31945	0.620191	2.12749	0.0333791	0.759009
ENSMUSG00000042804	Gpr153	protein_coding	4	152274232	G protein-coupled receptor 153	87.6961	-2.49988	0.70528	-2.12664	0.0334497	0.76025
ENSMUSG00000000290	Itgb2	protein_coding	10	77530252	integrin beta 2	849.342	-2.20135	0.564977	-2.12637	0.0334728	0.76041
ENSMUSG00000001865	Cpa3	protein_coding	3	20215620	carboxypeptidase A3, mast cell	2.11538	-4.20914	1.50972	-2.12566	0.0335318	0.761385
ENSMUSG00000100274	1700006F04Rik	lincRNA	14	119749225	RIKEN cDNA 1700006F04 gene	1.47812	-4.25814	1.53325	-2.12499	0.0335872	0.76246
ENSMUSG00000020717	Pecam1	protein_coding	11	106654217	platelet/endothelial cell adhesion molecule 1	193.805	-1.53619	0.252696	-2.12189	0.0338467	0.767613
ENSMUSG00000023045	Soat2	protein_coding	15	102150526	sterol O-acyltransferase 2	315.561	-1.6935	0.327633	-2.11669	0.0342861	0.775742
ENSMUSG00000042215	Bag2	protein_coding	1	33745484	BCL2-associated athanogene 2	537.268	1.41543	0.196633	2.11271	0.0346256	0.781532
ENSMUSG00000040204	Pclaf	protein_coding	9	65890237	PCNA clamp associated factor	261.803	2.11239	0.527023	2.1107	0.0347979	0.784673
ENSMUSG00000048965	Mrgpre	protein_coding	7	143778363	MAS-related GPR, member E	133.616	1.56786	0.269064	2.1105	0.0348155	0.784884
ENSMUSG00000005410	Mcm5	protein_coding	8	75109569	minichromosome maintenance complex component 5	884.159	1.95138	0.451115	2.10895	0.0349488	0.787513
ENSMUSG00000040322	Slc25a24	protein_coding	3	109123149	solute carrier family 25 (mitochondrial carrier, phosphate carrier), member 24	2251.28	1.483	0.229662	2.10309	0.035458	0.797656
ENSMUSG00000020334	Slc22a4	protein_coding	11	53983123	solute carrier family 22 (organic cation transporter), member 4	272.695	1.92655	0.440689	2.10251	0.0355086	0.798323
ENSMUSG00000059588	Calcrl	protein_coding	2	84330626	calcitonin receptor-like	116.949	-1.85292	0.406252	-2.09948	0.0357745	0.803441
ENSMUSG00000049382	Krt8	protein_coding	15	101996711	keratin 8	75980.2	1.57121	0.272537	2.0959	0.0360909	0.808437
ENSMUSG00000037466	4930427A07Rik	protein_coding	12	113156421	RIKEN cDNA 4930427A07 gene	237.291	1.91337	0.436088	2.09446	0.0362193	0.810546
ENSMUSG00000042182	Bend6	protein_coding	1	33852052	BEN domain containing 6	7.5678	-3.05347	0.980533	-2.09424	0.036239	0.810793
ENSMUSG00000097572	Gm26797	lincRNA	9	122295869	predicted gene, 26797	66.7823	-1.6604	0.315671	-2.09206	0.0364332	0.814368
ENSMUSG00000074743	Thbd	protein_coding	2	148404466	thrombomodulin	168.934	-1.60366	0.288707	-2.09092	0.0365352	0.816072
ENSMUSG00000031594	Fgl1	protein_coding	8	41191434	fibrinogen-like protein 1	72.9178	1.95221	0.45605	2.08794	0.0368034	0.820898
ENSMUSG00000073705	Apitd1	protein_coding	4	149127121	apoptosis-inducing, TAF9-like domain 1	52.9106	1.99927	0.478741	2.08728	0.0368627	0.822027
ENSMUSG00000030268	Bcat1	protein_coding	6	144993835	branched chain aminotransferase 1, cytosolic	17.187	-1.91443	0.438479	-2.08546	0.0370275	0.824732
ENSMUSG00000041708	Mpped1	protein_coding	15	83779467	metallophosphoesterase domain containing 1	2.55149	-3.97179	1.4311	-2.07657	0.0378409	0.839306
ENSMUSG00000021879	Dnah12	protein_coding	14	26693274	dynein, axonemal, heavy chain 12	8.22814	-2.39671	0.673464	-2.07392	0.0380867	0.843953
ENSMUSG00000034161	Scx	protein_coding	15	76457438	scleraxis	230.354	-1.47081	0.22721	-2.07215	0.0382517	0.846985
ENSMUSG00000093938	Evi2b	protein_coding	11	79515056	ecotropic viral integration site 2b	38.6209	-1.92951	0.450132	-2.06497	0.0389256	0.85919
ENSMUSG00000028312	Smc2	protein_coding	4	52439243	structural maintenance of chromosomes 2	478.179	1.80685	0.391048	2.06329	0.0390848	0.862132
ENSMUSG00000079243	Xirp1	protein_coding	9	120013755	xin actin-binding repeat containing 1	14.615	-3.47882	1.20522	-2.05674	0.0397109	0.873197
ENSMUSG00000015961	Adss	protein_coding	1	177762962	adenylosuccinate synthetase, non muscle	3759.19	1.29107	0.141551	2.05629	0.0397547	0.873552
ENSMUSG00000044041	Krt13	protein_coding	11	100117327	keratin 13	15.9478	4.21125	1.56429	2.05284	0.0400877	0.879846
ENSMUSG00000049625	Tifab	protein_coding	13	56173704	TRAF-interacting protein with forkhead-associated domain, family member B	50.3767	-2.19462	0.582253	-2.05172	0.0401971	0.88184
ENSMUSG00000090942	F830016B08Rik	protein_coding	18	60293380	RIKEN cDNA F830016B08 gene	61.5058	2.52449	0.743098	2.05153	0.0402156	0.882041
ENSMUSG00000087070	Gm12505	lincRNA	4	55410443	predicted gene 12505	145.187	2.19347	0.582766	2.04794	0.0405659	0.887814
ENSMUSG00000074472	Zfp872	protein_coding	9	22188090	zinc finger protein 872	101.428	2.00956	0.493468	2.04584	0.0407716	0.891344
ENSMUSG00000033024	Klra9	protein_coding	6	130178675	killer cell lectin-like receptor subfamily A, member 9	2.55878	-4.66339	1.79134	-2.04506	0.040849	0.892556
ENSMUSG00000005628	Tmod4	protein_coding	3	95124476	tropomodulin 4	16.5988	-2.29057	0.631432	-2.04389	0.0409649	0.894535
ENSMUSG00000063229	Ldha	protein_coding	7	46841475	lactate dehydrogenase A	19632.4	1.28049	0.137374	2.04181	0.0411702	0.898139
ENSMUSG00000022357	Klhl38	protein_coding	15	58314573	kelch-like 38	55.7134	-1.94533	0.463749	-2.03846	0.0415042	0.904017
ENSMUSG00000032359	Ctsh	protein_coding	9	90054152	cathepsin H	71278.1	1.46732	0.22947	2.03654	0.0416966	0.907373
ENSMUSG00000024857	Cabp2	protein_coding	19	4081578	calcium binding protein 2	3.56453	-3.94617	1.44679	-2.03636	0.0417147	0.90738
ENSMUSG00000047428	Dlk2	protein_coding	17	46297421	delta-like 2 homolog (Drosophila)	26.3472	3.06472	1.01498	2.03424	0.0419278	0.910611
ENSMUSG00000074457	S100a16	protein_coding	3	90537254	S100 calcium binding protein A16	2551.93	1.49172	0.241723	2.03424	0.0419275	0.910611
ENSMUSG00000075410	Prcd	protein_coding	11	116653534	photoreceptor disc component	65.5663	-2.26323	0.620951	-2.03435	0.0419167	0.910611
ENSMUSG00000019359	Gdpd2	protein_coding	X	100729873	glycerophosphodiester phosphodiesterase domain containing 2	240.942	-2.5023	0.738594	-2.03399	0.0419523	0.910634
ENSMUSG00000048163	Selplg	protein_coding	5	113818536	selectin, platelet (p-selectin) ligand	165.881	-1.92336	0.454229	-2.03281	0.0420718	0.9126
ENSMUSG00000079553	Kifc1	protein_coding	17	33875666	kinesin family member C1	178.397	2.16577	0.573811	2.03163	0.0421915	0.914778
ENSMUSG00000028255	Clca1	protein_coding	3	145003817	chloride channel accessory 1	30451.2	-3.34379	1.15376	-2.03143	0.0422114	0.914789
ENSMUSG00000061353	Cxcl12	protein_coding	6	117168535	chemokine (C-X-C motif) ligand 12	116.033	-1.80515	0.39655	-2.03039	0.042317	0.915819
ENSMUSG00000027656	Wisp2	protein_coding	2	163820861	WNT1 inducible signaling pathway protein 2	6.56131	-3.00014	0.985668	-2.02922	0.042436	0.917766
ENSMUSG00000033066	Gas7	protein_coding	11	67455437	growth arrest specific 7	717.658	1.64516	0.318473	2.0258	0.0427857	0.924061
ENSMUSG00000044783	Hjurp	protein_coding	1	88262471	Holliday junction recognition protein	1482.65	1.81856	0.404593	2.02316	0.0430567	0.927796
ENSMUSG00000037406	Htra4	protein_coding	8	25024929	HtrA serine peptidase 4	239.874	2.04764	0.517976	2.02256	0.043119	0.928928
ENSMUSG00000097789	Gm2115	protein_coding	7	84528954	predicted gene 2115	37.6297	-1.79098	0.391456	-2.02061	0.0433204	0.932843
ENSMUSG00000001029	Icam2	protein_coding	11	106377656	intercellular adhesion molecule 2	36.6557	-1.95492	0.472967	-2.01901	0.0434865	0.93568
ENSMUSG00000032053	Pou2af1	protein_coding	9	51213708	POU domain, class 2, associating factor 1	22.0148	-1.97808	0.484475	-2.01884	0.0435037	0.935725
ENSMUSG00000044719	E230025N22Rik	protein_coding	18	36684923	Riken cDNA E230025N22 gene	23.3508	2.45377	0.720205	2.01855	0.0435345	0.935826
ENSMUSG00000028940	Hes2	protein_coding	4	152158867	hairy and enhancer of split 2 (Drosophila)	20.5606	-2.10956	0.550342	-2.01613	0.0437867	0.940317
ENSMUSG00000043157	Arl11	protein_coding	14	61309753	ADP-ribosylation factor-like 11	42.8718	-2.02493	0.509475	-2.01174	0.0442471	0.94848
ENSMUSG00000039238	Zfp750	protein_coding	11	121510978	zinc finger protein 750	222.265	1.67875	0.337782	2.00944	0.0444908	0.951918
ENSMUSG00000020774	Aspa	protein_coding	11	73304992	aspartoacylase	349.156	2.0797	0.53749	2.00878	0.0445607	0.953044
ENSMUSG00000069917	Hba-a2	protein_coding	11	32296489	hemoglobin alpha, adult chain 2	198.19	-2.39953	0.698045	-2.00493	0.0449702	0.960285
ENSMUSG00000032122	Slc37a2	protein_coding	9	37227585	solute carrier family 37 (glycerol-3-phosphate transporter), member 2	51.6058	-1.90559	0.452526	-2.00118	0.0453731	0.967579
ENSMUSG00000055170	Ifng	protein_coding	10	118441046	interferon gamma	1.79275	-3.91898	1.46085	-1.99814	0.0457017	0.972832
ENSMUSG00000103644	Gm29678	lincRNA	1	190403645	predicted gene, 29678	6.37916	-2.28541	0.643697	-1.99692	0.0458343	0.974777
ENSMUSG00000058099	Nfam1	protein_coding	15	82997721	Nfat activating molecule with ITAM motif 1	91.7533	-1.98558	0.493603	-1.9967	0.0458578	0.975059
ENSMUSG00000027820	Mme	protein_coding	3	63241537	membrane metallo endopeptidase	463.784	-2.56318	0.782959	-1.9965	0.0458795	0.975081
ENSMUSG00000020614	Fam20a	protein_coding	11	109669749	family with sequence similarity 20, member A	122.018	2.02895	0.515475	1.99612	0.0459207	0.975738
ENSMUSG00000040711	Sh3pxd2b	protein_coding	11	32347820	SH3 and PX domains 2B	2097.65	1.31601	0.158392	1.99512	0.0460295	0.977795
ENSMUSG00000047867	Gimap6	protein_coding	6	48701582	GTPase, IMAP family member 6	57.4986	-1.89528	0.448782	-1.99491	0.0460527	0.977884
ENSMUSG00000028023	Pitx2	protein_coding	3	129199878	paired-like homeodomain transcription factor 2	1.4405	-3.8995	1.46089	-1.98476	0.0471715	0.997388
ENSMUSG00000000001	Gnai3	protein_coding	3	108107280	guanine nucleotide binding protein (G protein), alpha inhibiting 3	3924.36	0.450532	0.112763	0	1	1
ENSMUSG00000000003	Pbsn	protein_coding	X	77837901	probasin	0.395123	0.841188	2.55147	0	1	1
ENSMUSG00000000028	Cdc45	protein_coding	16	18780447	cell division cycle 45	161.223	1.5356	0.411573	1.30136	0.193136	1
ENSMUSG00000000031	H19	lincRNA	7	142575529	H19, imprinted maternally expressed transcript	6.09919	0.341489	1.09126	0	1	1
ENSMUSG00000000037	Scml2	protein_coding	X	161117193	sex comb on midleg-like 2 (Drosophila)	5.23683	-0.598805	0.801178	0	1	1
ENSMUSG00000000049	Apoh	protein_coding	11	108343354	apolipoprotein H	8.18946	2.25339	0.962988	1.30156	0.193066	1
ENSMUSG00000000056	Narf	protein_coding	11	121237253	nuclear prelamin A recognition factor	984.463	0.315184	0.244801	0	1	1
ENSMUSG00000000058	Cav2	protein_coding	6	17281185	caveolin 2	1785.28	0.728056	0.206582	0	1	1
ENSMUSG00000000078	Klf6	protein_coding	13	5861482	Kruppel-like factor 6	14595.3	0.240231	0.355821	0	1	1
ENSMUSG00000000085	Scmh1	protein_coding	4	120405281	sex comb on midleg homolog 1	1917.84	0.083795	0.0912092	0	1	1
ENSMUSG00000000088	Cox5a	protein_coding	9	57521274	cytochrome c oxidase subunit Va	2434.07	0.443319	0.15538	0	1	1
ENSMUSG00000000093	Tbx2	protein_coding	11	85832551	T-box 2	39.5364	-0.853312	0.482618	0	1	1
ENSMUSG00000000094	Tbx4	protein_coding	11	85886422	T-box 4	33.3634	-0.714737	0.471072	0	1	1
ENSMUSG00000000120	Ngfr	protein_coding	11	95568818	nerve growth factor receptor (TNFR superfamily, member 16)	4.7871	-1.47194	0.916999	-0.514657	0.606793	1
ENSMUSG00000000125	Wnt3	protein_coding	11	103774150	wingless-type MMTV integration site family, member 3	2.02014	-0.186604	1.25991	0	1	1
ENSMUSG00000000126	Wnt9a	protein_coding	11	59306928	wingless-type MMTV integration site family, member 9A	23.3379	-1.3668	0.32344	-1.13404	0.256776	1
ENSMUSG00000000127	Fer	protein_coding	17	63896018	fer (fms/fps related) protein kinase	413.628	0.264224	0.136536	0	1	1
ENSMUSG00000000131	Xpo6	protein_coding	7	126101715	exportin 6	2283.55	-0.068793	0.0897282	0	1	1
ENSMUSG00000000134	Tfe3	protein_coding	X	7762560	transcription factor E3	1619.72	0.242669	0.181066	0	1	1
ENSMUSG00000000142	Axin2	protein_coding	11	108920349	axin 2	275.542	-1.14519	0.394509	-0.368033	0.712849	1
ENSMUSG00000000148	Brat1	protein_coding	5	140705011	BRCA1-associated ATM activator 1	589.243	-0.211314	0.105019	0	1	1
ENSMUSG00000000149	Gna12	protein_coding	5	140758408	guanine nucleotide binding protein, alpha 12	1691.95	-0.213608	0.111974	0	1	1
ENSMUSG00000000154	Slc22a18	protein_coding	7	143473736	solute carrier family 22 (organic cation transporter), member 18	801.787	0.246789	0.215443	0	1	1
ENSMUSG00000000157	Itgb2l	protein_coding	16	96422288	integrin beta 2-like	42.0846	0.428672	0.365866	0	1	1
ENSMUSG00000000159	Igsf5	protein_coding	16	96361668	immunoglobulin superfamily, member 5	2733.61	0.516371	0.142874	0	1	1
ENSMUSG00000000167	Pih1d2	protein_coding	9	50617321	PIH1 domain containing 2	70.3122	0.0295761	0.229995	0	1	1
ENSMUSG00000000168	Dlat	protein_coding	9	50634633	dihydrolipoamide S-acetyltransferase (E2 component of pyruvate dehydrogenase complex)	1615.7	0.369546	0.0885037	0	1	1
ENSMUSG00000000171	Sdhd	protein_coding	9	50596357	succinate dehydrogenase complex, subunit D, integral membrane protein	3637.99	0.39713	0.134811	0	1	1
ENSMUSG00000000182	Fgf23	protein_coding	6	127072902	fibroblast growth factor 23	1.31357	0.187204	1.21684	0	1	1
ENSMUSG00000000183	Fgf6	protein_coding	6	127015586	fibroblast growth factor 6	10.904	-0.530271	0.485005	0	1	1
ENSMUSG00000000184	Ccnd2	protein_coding	6	127125162	cyclin D2	7546.56	0.518847	0.851589	0	1	1
ENSMUSG00000000194	Gpr107	protein_coding	2	31152316	G protein-coupled receptor 107	2219.56	0.0674198	0.153214	0	1	1
ENSMUSG00000000197	Nalcn	protein_coding	14	123276641	sodium leak channel, non-selective	5.92371	0.300558	0.766898	0	1	1
ENSMUSG00000000202	Btbd17	protein_coding	11	114791217	BTB (POZ) domain containing 17	54.4282	1.83452	0.539465	1.54695	0.121876	1
ENSMUSG00000000204	Slfn4	protein_coding	11	83175186	schlafen 4	144.941	1.25811	0.979408	0.263537	0.792136	1
ENSMUSG00000000214	Th	protein_coding	7	142892752	tyrosine hydroxylase	5.64285	-0.0585003	0.848185	0	1	1
ENSMUSG00000000215	Ins2	protein_coding	7	142678656	insulin II	1.05599	0.378488	1.92883	0	1	1
ENSMUSG00000000216	Scnn1g	protein_coding	7	121734479	sodium channel, nonvoltage-gated 1 gamma	712.487	-1.32983	0.265031	-1.24451	0.21331	1
ENSMUSG00000000223	Drp2	protein_coding	X	134404551	dystrophin related protein 2	11.9479	-0.0345839	0.543309	0	1	1
ENSMUSG00000000244	Tspan32	protein_coding	7	143005046	tetraspanin 32	37.1692	-0.749144	0.475608	0	1	1
ENSMUSG00000000247	Lhx2	protein_coding	2	38339281	LIM homeobox protein 2	7.16418	-1.17106	0.767009	-0.223026	0.823516	1
ENSMUSG00000000248	Clec2g	protein_coding	6	128934381	C-type lectin domain family 2, member g	8.1356	-0.863816	0.956694	0	1	1
ENSMUSG00000000253	Gmpr	protein_coding	13	45507444	guanosine monophosphate reductase	387.379	-0.801178	0.264949	0	1	1
ENSMUSG00000000263	Glra1	protein_coding	11	55514238	glycine receptor, alpha 1 subunit	0.433771	-0.590113	2.20375	0	1	1
ENSMUSG00000000266	Mid2	protein_coding	X	140664599	midline 2	780.274	0.419232	0.234355	0	1	1
ENSMUSG00000000275	Trim25	protein_coding	11	88999376	tripartite motif-containing 25	3595.95	-0.108695	0.113069	0	1	1
ENSMUSG00000000276	Dgke	protein_coding	11	89035179	diacylglycerol kinase, epsilon	361.299	0.149396	0.13894	0	1	1
ENSMUSG00000000278	Scpep1	protein_coding	11	88924020	serine carboxypeptidase 1	3140.05	-0.537234	0.151146	0	1	1
ENSMUSG00000000282	Mnt	protein_coding	11	74830920	max binding protein	1141.4	0.254991	0.229397	0	1	1
ENSMUSG00000000295	Hddc2	protein_coding	10	31313383	HD domain containing 2	283.243	-0.149303	0.195794	0	1	1
ENSMUSG00000000296	Tpd52l1	protein_coding	10	31332376	tumor protein D52-like 1	152.558	-0.415754	0.423854	0	1	1
ENSMUSG00000000301	Pemt	protein_coding	11	59970614	phosphatidylethanolamine N-methyltransferase	74.2906	0.0464331	0.248283	0	1	1
ENSMUSG00000000303	Cdh1	protein_coding	8	106603351	cadherin 1	36107.1	-0.152959	0.172359	0	1	1
ENSMUSG00000000305	Cdh4	protein_coding	2	179442431	cadherin 4	20.7262	-0.294277	0.467477	0	1	1
ENSMUSG00000000317	Bcl6b	protein_coding	11	70224128	B cell CLL/lymphoma 6, member B	15.5397	-0.774395	0.506928	0	1	1
ENSMUSG00000000318	Clec10a	protein_coding	11	70156197	C-type lectin domain family 10, member A	11.3676	-1.79625	0.778447	-1.02287	0.306371	1
ENSMUSG00000000320	Alox12	protein_coding	11	70241457	arachidonate 12-lipoxygenase	37.4405	-0.913803	0.414428	0	1	1
ENSMUSG00000000325	Arvcf	protein_coding	16	18348182	armadillo repeat gene deleted in velocardiofacial syndrome	370.715	-0.0825022	0.240653	0	1	1
ENSMUSG00000000326	Comt	protein_coding	16	18406886	catechol-O-methyltransferase	2225.1	-0.304132	0.0961894	0	1	1
ENSMUSG00000000339	Rtca	protein_coding	3	116488963	RNA 3'-terminal phosphate cyclase	579.201	0.408248	0.117441	0	1	1
ENSMUSG00000000340	Dbt	protein_coding	3	116513070	dihydrolipoamide branched chain transacylase E2	887.205	0.331387	0.232367	0	1	1
ENSMUSG00000000346	Dazap2	protein_coding	15	100615628	DAZ associated protein 2	8835.08	-0.176978	0.135542	0	1	1
ENSMUSG00000000355	Mcts1	protein_coding	X	38600578	malignant T cell amplified sequence 1	425.482	0.111527	0.190117	0	1	1
ENSMUSG00000000359	Rem1	protein_coding	2	152626951	rad and gem related GTP binding protein 1	7.80925	-0.563581	1.0865	0	1	1
ENSMUSG00000000365	Rnf17	protein_coding	14	56402581	ring finger protein 17	7.68675	-0.374181	0.872854	0	1	1
ENSMUSG00000000374	Trappc10	protein_coding	10	78186725	trafficking protein particle complex 10	2413.28	0.00178703	0.095436	0	1	1
ENSMUSG00000000378	Ccm2	protein_coding	11	6546887	cerebral cavernous malformation 2	876.603	-0.0630643	0.115469	0	1	1
ENSMUSG00000000384	Tbrg4	protein_coding	11	6615598	transforming growth factor beta regulated gene 4	881.034	0.374599	0.120392	0	1	1
ENSMUSG00000000385	Tmprss2	protein_coding	16	97564684	transmembrane protease, serine 2	12527.3	0.713827	0.218485	0	1	1
ENSMUSG00000000386	Mx1	protein_coding	16	97447035	MX dynamin-like GTPase 1	176.063	1.99766	0.580175	1.71958	0.0855084	1
ENSMUSG00000000392	Fap	protein_coding	2	62500943	fibroblast activation protein	11.3953	-0.738348	0.584159	0	1	1
ENSMUSG00000000394	Gcg	protein_coding	2	62474530	glucagon	2.90983	-0.947256	0.992299	0	1	1
ENSMUSG00000000399	Ndufa9	protein_coding	6	126821721	NADH dehydrogenase (ubiquinone) 1 alpha subcomplex, 9	2154.34	0.249995	0.129033	0	1	1
ENSMUSG00000000402	Egfl6	protein_coding	X	166523007	EGF-like-domain, multiple 6	7658.96	-0.303348	0.310317	0	1	1
ENSMUSG00000000409	Lck	protein_coding	4	129548344	lymphocyte protein tyrosine kinase	41.1837	-0.11771	0.377796	0	1	1
ENSMUSG00000000411	Tssk3	protein_coding	4	129489014	testis-specific serine kinase 3	2.20153	-0.0480542	0.951591	0	1	1
ENSMUSG00000000416	Cttnbp2	protein_coding	6	18366478	cortactin binding protein 2	9.08316	-0.508027	0.980335	0	1	1
ENSMUSG00000000420	Galnt1	protein_coding	18	24205344	UDP-N-acetyl-alpha-D-galactosamine:polypeptide N-acetylgalactosaminyltransferase 1	3738.44	0.44235	0.100997	0	1	1
ENSMUSG00000000435	Myf5	protein_coding	10	107482908	myogenic factor 5	10.2875	-0.107514	0.437282	0	1	1
ENSMUSG00000000439	Mkrn2	protein_coding	6	115601902	makorin, ring finger protein, 2	965.507	0.0394417	0.143529	0	1	1
ENSMUSG00000000440	Pparg	protein_coding	6	115360951	peroxisome proliferator activated receptor gamma	761.226	-0.357704	0.41579	0	1	1
ENSMUSG00000000441	Raf1	protein_coding	6	115618067	v-raf-leukemia viral oncogene 1	4322.11	-0.0947238	0.090012	0	1	1
ENSMUSG00000000486	Sept1	protein_coding	7	127214447	septin 1	73.3071	-0.379646	0.405249	0	1	1
ENSMUSG00000000489	Pdgfb	protein_coding	15	79995900	platelet derived growth factor, B polypeptide	776.886	-0.497365	0.216293	0	1	1
ENSMUSG00000000531	Grasp	protein_coding	15	101224207	GRP1 (general receptor for phosphoinositides 1)-associated scaffold protein	1200.38	1.01628	0.233996	0.069577	0.94453	1
ENSMUSG00000000532	Acvr1b	protein_coding	15	101174067	activin A receptor, type 1B	2702.23	0.550052	0.197744	0	1	1
ENSMUSG00000000538	Tom1l2	protein_coding	11	60226714	target of myb1-like 2 (chicken)	2364.91	0.13939	0.127362	0	1	1
ENSMUSG00000000544	Gpa33	protein_coding	1	166130238	glycoprotein A33 (transmembrane)	2100.02	1.08875	0.567769	0.15632	0.87578	1
ENSMUSG00000000552	Zfp385a	protein_coding	15	103313895	zinc finger protein 385A	73.2341	-0.230527	0.349302	0	1	1
ENSMUSG00000000555	Itga5	protein_coding	15	103344286	integrin alpha 5 (fibronectin receptor alpha)	196.178	-0.566258	0.256088	0	1	1
ENSMUSG00000000560	Gabra2	protein_coding	5	70957597	gamma-aminobutyric acid (GABA) A receptor, subunit alpha 2	11.6596	0.592891	0.584537	0	1	1
ENSMUSG00000000561	Wdr77	protein_coding	3	105959369	WD repeat domain 77	1580.22	0.331025	0.143555	0	1	1
ENSMUSG00000000562	Adora3	protein_coding	3	105870858	adenosine A3 receptor	25.6224	-0.164964	0.687675	0	1	1
ENSMUSG00000000563	Atp5f1	protein_coding	3	105942698	ATP synthase, H+ transporting, mitochondrial F0 complex, subunit B1	5857.25	0.110665	0.184534	0	1	1
ENSMUSG00000000567	Sox9	protein_coding	11	112782224	SRY (sex determining region Y)-box 9	760.537	-0.648398	0.847249	0	1	1
ENSMUSG00000000568	Hnrnpd	protein_coding	5	99955935	heterogeneous nuclear ribonucleoprotein D	3160.89	0.227906	0.175032	0	1	1
ENSMUSG00000000579	Dynlt1c	protein_coding	17	6601671	dynein light chain Tctex-type 1C	169.371	-0.325445	0.361935	0	1	1
ENSMUSG00000000581	C1d	protein_coding	11	17257579	C1D nuclear receptor co-repressor	527.548	0.455929	0.169467	0	1	1
ENSMUSG00000000594	Gm2a	protein_coding	11	55098115	GM2 ganglioside activator protein	773.824	-0.757884	0.216243	0	1	1
ENSMUSG00000000600	Krit1	protein_coding	5	3803184	KRIT1, ankyrin repeat containing	954.766	-0.0998016	0.146029	0	1	1
ENSMUSG00000000605	Clcn4	protein_coding	7	7282309	chloride channel, voltage-sensitive 4	1850.24	0.112491	0.142565	0	1	1
ENSMUSG00000000606	Vmn2r88	protein_coding	14	51411001	vomeronasal 2, receptor 88	2.36871	1.02692	1.09319	0.0246244	0.980355	1
ENSMUSG00000000617	Grm6	protein_coding	11	50850685	glutamate receptor, metabotropic 6	3.66885	0.168936	0.771866	0	1	1
ENSMUSG00000000627	Sema4f	protein_coding	6	82911885	sema domain, immunoglobulin domain (Ig), TM domain, and short cytoplasmic domain	427.472	-1.58502	0.393612	-1.48627	0.137207	1
ENSMUSG00000000628	Hk2	protein_coding	6	82725025	hexokinase 2	1666.37	1.34652	0.499716	0.693436	0.488036	1
ENSMUSG00000000631	Myo18a	protein_coding	11	77763246	myosin XVIIIA	10075.9	0.712847	0.141484	0	1	1
ENSMUSG00000000632	Sez6	protein_coding	11	77930800	seizure related gene 6	7.65892	0.200742	0.640037	0	1	1
ENSMUSG00000000673	Haao	protein_coding	17	83831356	3-hydroxyanthranilate 3,4-dioxygenase	2.6632	-1.18338	0.862919	-0.212512	0.831707	1
ENSMUSG00000000682	Cd52	protein_coding	4	134082448	CD52 antigen	62.2931	-0.979376	0.392925	0	1	1
ENSMUSG00000000686	Abhd15	protein_coding	11	77515121	abhydrolase domain containing 15	9.67997	1.37175	0.641718	0.579302	0.562385	1
ENSMUSG00000000690	Hoxb6	protein_coding	11	96292476	homeobox B6	1.49564	0.195029	1.0591	0	1	1
ENSMUSG00000000693	Loxl3	protein_coding	6	83034173	lysyl oxidase-like 3	30.0672	0.524869	0.586178	0	1	1
ENSMUSG00000000706	Btn1a1	protein_coding	13	23456992	butyrophilin, subfamily 1, member A1	4.09384	-0.0103341	0.905989	0	1	1
ENSMUSG00000000708	Kat2b	protein_coding	17	53566861	K(lysine) acetyltransferase 2B	2529.74	-0.108107	0.18736	0	1	1
ENSMUSG00000000711	Rab5b	protein_coding	10	128677175	RAB5B, member RAS oncogene family	5132.51	-0.126213	0.130526	0	1	1
ENSMUSG00000000724	Cryba1	protein_coding	11	77718615	crystallin, beta A1	2.05224	0.854566	0.97486	0	1	1
ENSMUSG00000000730	Dnmt3l	protein_coding	10	78041947	DNA (cytosine-5-)-methyltransferase 3-like	1.24887	0.413395	1.64586	0	1	1
ENSMUSG00000000731	Aire	protein_coding	10	78030022	autoimmune regulator (autoimmune polyendocrinopathy candidiasis ectodermal dystrophy)	7.42717	0.224152	0.711545	0	1	1
ENSMUSG00000000732	Icosl	protein_coding	10	78069302	icos ligand	195.557	-0.20761	0.177532	0	1	1
ENSMUSG00000000738	Spg7	protein_coding	8	123062942	SPG7, paraplegin matrix AAA peptidase subunit	1553.64	0.370575	0.10723	0	1	1
ENSMUSG00000000739	Sult5a1	protein_coding	8	123140192	sulfotransferase family 5A, member 1	10.2016	-0.250145	0.661233	0	1	1
ENSMUSG00000000740	Rpl13	protein_coding	8	123102350	ribosomal protein L13	2399.14	-0.310181	0.176546	0	1	1
ENSMUSG00000000743	Chmp1a	protein_coding	8	123204264	charged multivesicular body protein 1A	2982.32	0.188106	0.195566	0	1	1
ENSMUSG00000000751	Rpa1	protein_coding	11	75298166	replication protein A1	1337.4	0.178975	0.179793	0	1	1
ENSMUSG00000000753	Serpinf1	protein_coding	11	75409769	serine (or cysteine) peptidase inhibitor, clade F, member 1	77.2792	-1.64623	0.744354	-0.86817	0.385301	1
ENSMUSG00000000759	Tubgcp3	protein_coding	8	12614277	tubulin, gamma complex associated protein 3	1556.83	-0.430487	0.137936	0	1	1
ENSMUSG00000000766	Oprm1	protein_coding	10	6758506	opioid receptor, mu 1	19.8611	-1.37177	0.377046	-0.986021	0.324123	1
ENSMUSG00000000776	Polr3d	protein_coding	14	70438748	polymerase (RNA) III (DNA directed) polypeptide D	774.973	0.178248	0.100086	0	1	1
ENSMUSG00000000782	Tcf7	protein_coding	11	52252371	transcription factor 7, T cell specific	112.465	-0.958054	0.27599	0	1	1
ENSMUSG00000000787	Ddx3x	protein_coding	X	13280970	DEAD/H (Asp-Glu-Ala-Asp/His) box polypeptide 3, X-linked	11809.9	0.207975	0.245981	0	1	1
ENSMUSG00000000791	Il12rb1	protein_coding	8	70808449	interleukin 12 receptor, beta 1	10.6702	-0.249816	0.687494	0	1	1
ENSMUSG00000000792	Slc5a5	protein_coding	8	70882889	solute carrier family 5 (sodium iodide symporter), member 5	85.1426	1.25174	0.558689	0.450596	0.652281	1
ENSMUSG00000000794	Kcnn3	protein_coding	3	89520164	potassium intermediate/small conductance calcium-activated channel, subfamily N, member 3	457.672	0.388966	0.372478	0	1	1
ENSMUSG00000000804	Usp32	protein_coding	11	84984442	ubiquitin specific peptidase 32	1710.13	-0.0441612	0.174216	0	1	1
ENSMUSG00000000805	Car4	protein_coding	11	84957786	carbonic anhydrase 4	268.009	-1.76989	0.565482	-1.36148	0.173364	1
ENSMUSG00000000817	Fasl	protein_coding	1	161780689	Fas ligand (TNF superfamily, member 6)	2.92216	-1.76488	1.20331	-0.635645	0.525008	1
ENSMUSG00000000823	Zfp512b	protein_coding	2	181582103	zinc finger protein 512B	1413.97	0.132083	0.135382	0	1	1
ENSMUSG00000000826	Dnajc5	protein_coding	2	181520485	DnaJ heat shock protein family (Hsp40) member C5	4635.59	0.456052	0.124156	0	1	1
ENSMUSG00000000827	Tpd52l2	protein_coding	2	181497142	tumor protein D52-like 2	2307.14	0.157425	0.0960901	0	1	1
ENSMUSG00000000838	Fmr1	protein_coding	X	68678541	fragile X mental retardation syndrome 1	1028.44	0.185013	0.134645	0	1	1
ENSMUSG00000000861	Bcl11a	protein_coding	11	24078056	B cell CLL/lymphoma 11A (zinc finger protein)	9.10367	-1.07728	0.592505	-0.130434	0.896223	1
ENSMUSG00000000869	Il4	protein_coding	11	53602982	interleukin 4	11.1076	0.319787	0.463836	0	1	1
ENSMUSG00000000876	Pxmp4	protein_coding	2	154585758	peroxisomal membrane protein 4	858.282	-0.224332	0.164802	0	1	1
ENSMUSG00000000881	Dlg3	protein_coding	X	100767722	discs, large homolog 3 (Drosophila)	1780.75	0.197905	0.198629	0	1	1
ENSMUSG00000000884	Gnb1l	protein_coding	16	18498768	guanine nucleotide binding protein (G protein), beta polypeptide 1-like	119.159	-0.377917	0.191126	0	1	1
ENSMUSG00000000889	Dbh	protein_coding	2	27165233	dopamine beta hydroxylase	2.27386	-2.30867	1.18087	-1.10823	0.267763	1
ENSMUSG00000000901	Mmp11	protein_coding	10	75923222	matrix metallopeptidase 11	849.276	-1.46104	0.295876	-1.55821	0.119184	1
ENSMUSG00000000902	Smarcb1	protein_coding	10	75896769	SWI/SNF related, matrix associated, actin dependent regulator of chromatin, subfamily b, member 1	1921.39	0.0484962	0.116342	0	1	1
ENSMUSG00000000915	Hip1r	protein_coding	5	123973628	huntingtin interacting protein 1 related	4619.06	-0.0400891	0.147449	0	1	1
ENSMUSG00000000916	Nsun5	protein_coding	5	135369953	NOL1/NOP2/Sun domain family, member 5	252.194	-0.135648	0.196343	0	1	1
ENSMUSG00000000934	Top1mt	protein_coding	15	75657035	DNA topoisomerase 1, mitochondrial	216.87	-0.475126	0.169842	0	1	1
ENSMUSG00000000938	Hoxa10	protein_coding	6	52231197	homeobox A10	1.58926	1.78133	1.36912	0.570678	0.568218	1
ENSMUSG00000000942	Hoxa4	protein_coding	6	52189671	homeobox A4	1.41097	-1.51868	1.29389	-0.400869	0.688517	1
ENSMUSG00000000948	Gm38393	protein_coding	7	59974149	predicted gene, 38393	9.97263	-0.00533495	0.590055	0	1	1
ENSMUSG00000000957	Mmp14	protein_coding	14	54431612	matrix metallopeptidase 14 (membrane-inserted)	3439.9	0.351288	0.291282	0	1	1
ENSMUSG00000000958	Slc7a7	protein_coding	14	54369442	solute carrier family 7 (cationic amino acid transporter, y+ system), member 7	482.723	-0.726772	0.347274	0	1	1
ENSMUSG00000000959	Oxa1l	protein_coding	14	54360841	oxidase assembly 1-like	1835.51	-0.0520984	0.113607	0	1	1
ENSMUSG00000000976	Heatr6	protein_coding	11	83753696	HEAT repeat containing 6	832.409	0.339474	0.150118	0	1	1
ENSMUSG00000000982	Ccl3	protein_coding	11	83647844	chemokine (C-C motif) ligand 3	51.9174	-1.29004	0.596095	-0.486559	0.626571	1
ENSMUSG00000000983	Wfdc18	protein_coding	11	83709015	WAP four-disulfide core domain 18	45.0432	-1.54217	1.28642	-0.421453	0.673424	1
ENSMUSG00000001014	Icam4	protein_coding	9	21029373	intercellular adhesion molecule 4, Landsteiner-Wiener blood group	75.8328	1.09619	0.342106	0.28118	0.778572	1
ENSMUSG00000001016	Ilf2	protein_coding	3	90476126	interleukin enhancer binding factor 2	1677.27	0.189585	0.149666	0	1	1
ENSMUSG00000001017	Chtop	protein_coding	3	90498956	chromatin target of PRMT1	2921.65	0.103905	0.0750156	0	1	1
ENSMUSG00000001018	Snapin	protein_coding	3	90488026	SNAP-associated protein	1243.13	-0.183163	0.181753	0	1	1
ENSMUSG00000001020	S100a4	protein_coding	3	90603771	S100 calcium binding protein A4	61.7888	-0.353188	0.389463	0	1	1
ENSMUSG00000001021	S100a3	protein_coding	3	90560578	S100 calcium binding protein A3	23.3853	-0.111941	0.393218	0	1	1
ENSMUSG00000001023	S100a5	protein_coding	3	90608523	S100 calcium binding protein A5	3.27136	0.706592	1.61513	0	1	1
[truncated: 22,761 more rows]

## Sheet: BPN_C.vs.BPN_TX
id	gene_name	biotype	chromosome	start	description	baseMean	log2FoldChange	lfcSE	stat	pvalue	padj
[truncated: 23,715 more rows]

## Sheet: BP_TX.vs.BPN_TX
id	gene_name	biotype	chromosome	start	description	baseMean	log2FoldChange	lfcSE	stat	pvalue	padj
[truncated: 23,715 more rows]
