# Supplementary material for: An NKX2-1/ERK/WNT feedback loop modulates gastric identity and response to targeted therapy in lung adenocarcinoma
Source: eLife. 2021 Apr 6;10:e66788. doi: 10.7554/eLife.66788 (PMC8102067; doi:10.7554/eLife.66788)
Supplement: Supplementary file 2. [file elife-66788-supp2.xlsx]

## Sheet: BP-volcano-supplementary
Differentially expressed genes between BP control and BP treated
Genes	logFC	PValue	Significant
S100a6	-1.3292	3.33e-19	HighSignicant
Uhrf1	-1.21937	6.03e-07	HighSignicant
Ube2c	-1.9526	2.59e-10	HighSignicant
Edar	2.76358	4.15e-07	HighSignicant
Rab3b	-1.21114	0.152678	HighSignicant
Bcan	1.20569	0.138097	HighSignicant
Epor	-3.39958	1.01e-14	HighSignicant
Wnt3a	4.47624	1.78e-14	HighSignicant
Acaa1b	-1.41719	0.000483189	HighSignicant
Slc5a1	0.00343497	1	HighSignicant
Kif11	-1.80996	6.2e-08	HighSignicant
Pax5	3.29357	0.00344051	HighSignicant
Aldh1a3	-3.59847	8.61e-36	HighSignicant
Itga2	-1.64058	2.87e-22	HighSignicant
Awat1	2.12919	0.0103707	HighSignicant
Etv4	-1.31304	2.34e-14	HighSignicant
Hnf4a	0.133614	0.650727	HighSignicant
Cdk1	-1.96928	4.82e-11	HighSignicant
Arg1	-0.070426	1	HighSignicant
Ifi27l2b	-1.21678	7.78e-07	HighSignicant
Hecw1	-3.63371	4.51e-25	HighSignicant
Itih4	1.5704	9.04e-09	HighSignicant
Pbk	-1.83754	4.35e-08	HighSignicant
Cldn10	1.89939	0.00145567	HighSignicant
Gzme	-10.4197	3.05e-50	HighSignicant
Mcpt8	-6.64742	3.07e-27	HighSignicant
Slc7a8	2.32072	1.29e-08	HighSignicant
C6	3.51553	2.62e-16	HighSignicant
Col14a1	0.986685	0.0454536	HighSignicant
Arc	0.419807	0.39383	HighSignicant
Cdca3	-1.48834	9.36e-05	HighSignicant
Smoc2	3.13613	1.55e-08	HighSignicant
Tff1	-2.94794	1.1e-73	HighSignicant
Adcyap1	-4.69386	1.12e-44	HighSignicant
Celf4	-2.65852	1.31e-60	HighSignicant
Cep55	-1.92761	3.45e-09	HighSignicant
Pik3ap1	2.65435	3.29e-26	HighSignicant
Cbr2	4.6259	7.46e-18	HighSignicant
Ptprn	-7.18449	1.43e-63	HighSignicant
Bok	-0.185546	0.444586	HighSignicant
Mixl1	-2.32196	3.21e-11	HighSignicant
Lamc3	-2.59704	0.0256558	HighSignicant
Hc	2.70069	6.16e-34	HighSignicant
Nusap1	-1.25882	0.0234314	HighSignicant
Knstrn	-1.55021	4.71e-10	HighSignicant
Ccna2	-1.68965	2.08e-08	HighSignicant
Hmgcs2	2.19741	0.000339255	HighSignicant
Tdo2	-3.23054	4.97e-14	HighSignicant
Ecm1	-2.8665	6.14e-36	HighSignicant
Col15a1	-7.42834	3.56e-92	HighSignicant
Zfp618	1.55003	3.41e-05	HighSignicant
Aqp3	-3.37724	3.3e-23	HighSignicant
Npr2	2.43638	1.82e-11	HighSignicant
Cyp4b1	3.20697	1.27e-15	HighSignicant
Ereg	-5.02101	2.98e-35	HighSignicant
Gkn2	-4.49763	3.06e-38	HighSignicant
Mesp1	1.7771	0.00116526	HighSignicant
Ern2	1.02306	4.6e-10	HighSignicant
Art1	1.86361	0.0570143	HighSignicant
Tnni2	-0.405088	0.146559	HighSignicant
N4bp1	0.0788004	0.808566	HighSignicant
Cdh5	0.55881	0.269495	HighSignicant
Apoc3	0.647069	0.944651	HighSignicant
Rnf111	0.103987	0.75273	HighSignicant
Fam81a	0.260968	0.768414	HighSignicant
Slco2a1	-1.35431	1.09e-15	HighSignicant
Ttll4	0.24869	0.309605	HighSignicant
Prss55	-0.147666	1	HighSignicant
Kcnc2	-0.214813	0.990509	HighSignicant
H2.Q4	-0.391781	0.227883	HighSignicant
Decr2	0.140895	0.782496	HighSignicant
Cfap221	-1.19457	0.354377	HighSignicant
Mex3c	0.750643	8.55e-06	HighSignicant
Kin	0.315961	0.296638	HighSignicant
Kcnmb2	0.498064	0.957179	HighSignicant
Fdxacb1	0.308276	0.459659	HighSignicant
Atg9b	-3.10539	5.85e-38	HighSignicant
Saxo2	-0.214506	0.829448	HighSignicant
Sccpdh	-0.27489	0.43278	HighSignicant
Hrh3	0.335129	0.993167	HighSignicant
X1110008P14Rik	-1.32813	1.05e-11	HighSignicant
Clstn1	0.746812	5.06e-06	HighSignicant
Cep78	0.431274	0.222943	HighSignicant
Armc5	-0.173854	0.51237	HighSignicant
Upk3b	-0.134824	0.901887	HighSignicant
Nemp2	0.42569	0.251067	HighSignicant
Acot6	0.181002	0.856625	HighSignicant
Olfr545	-0.492577	0.725596	HighSignicant
H1fx	-1.12657	0.00339174	HighSignicant
Acer1	-0.336389	0.97612	HighSignicant
Olfml2a	0.0876905	0.993082	HighSignicant
Bst2	-0.953093	0.0158768	HighSignicant
Serpinb13	-0.650432	0.299333	HighSignicant
Gm8186	0.535569	0.0262094	HighSignicant
Bmpr1b	0.655598	0.410207	HighSignicant
Hunk	-1.85667	0.0140785	HighSignicant
Fabp1	2.95287	0.000353848	HighSignicant
Spock2	3.1883	1.69e-21	HighSignicant
Olfr224	-5.87854	1.01e-12	HighSignicant
Tmem40	-0.687193	0.0289981	HighSignicant
Ppp1r1b	3.51115	2.08e-31	HighSignicant
Fabp4	2.33594	0.000181726	HighSignicant
Chia1	1.6671	1.27e-07	HighSignicant
Aox3	2.56257	5.22e-12	HighSignicant
Cyp4a12a	1.69277	0.0499452	HighSignicant
X6030419C18Rik	-0.644947	0.254949	HighSignicant
Cryba4	2.60408	0.141794	HighSignicant
Ear2	2.96156	8e-06	HighSignicant
Ear1	3.54263	4.29e-06	HighSignicant
Hbb.bt	1.37638	0.113691	HighSignicant
Arhgap40	-0.409536	0.0221942	HighSignicant
Cyp4a12b	4.08937	0.000322246	HighSignicant
Kcnj13	3.24716	5.15e-16	HighSignicant
A930018M24Rik	1.65531	0.0285686	HighSignicant
Gcnt4	-1.94926	1.42e-27	HighSignicant
Gm3752	6.21731	0.0128449	HighSignicant
E030044B06Rik	3.13186	0.00169994	HighSignicant
Gm43064	2.16832	0.116143	HighSignicant
Gm32633	2.0896	0.00362057	HighSignicant
Gm45332	1.56869	0.158232	HighSignicant
Itgb2	1.91513	0.00326558	ModerateSignicant
Ckmt1	-0.431707	0.0235799	ModerateSignicant
Acvrl1	1.46641	5.07e-05	ModerateSignicant
Spi1	2.14407	4.74e-05	ModerateSignicant
Gnmt	0.906838	0.0220147	ModerateSignicant
Lamb1	-3.15067	2.46e-19	ModerateSignicant
Prkar2b	1.53456	1.43e-10	ModerateSignicant
St8sia6	-2.55969	7.94e-48	ModerateSignicant
P2rx5	0.769168	0.106927	ModerateSignicant
Htra1	0.992456	0.0127005	ModerateSignicant
Fbln1	0.767656	0.0641916	ModerateSignicant
Bcas1	-1.14646	3.26e-14	ModerateSignicant
Abca1	3.11189	1.52e-17	ModerateSignicant
Lpl	2.30634	7.06e-05	ModerateSignicant
Stk32c	1.03993	0.214951	ModerateSignicant
Plxdc1	2.17584	9.45e-05	ModerateSignicant
Cyth4	1.85425	0.0010699	ModerateSignicant
Lsp1	2.25432	0.000146146	ModerateSignicant
Ccl6	1.85986	0.000158629	ModerateSignicant
Scn1b	-1.84874	1.11e-11	ModerateSignicant
Dusp6	-2.71928	6.02e-47	ModerateSignicant
Vnn3	0.893093	0.0705401	ModerateSignicant
Ntn4	0.7866	6.47e-06	ModerateSignicant
Aldh1l2	0.60365	0.422117	ModerateSignicant
Havcr2	2.09351	7.01e-05	ModerateSignicant
Ace	-2.87803	1.68e-58	ModerateSignicant
Krt19	-0.202747	0.348003	ModerateSignicant
Fbln5	0.811719	0.0132668	ModerateSignicant
Evl	2.36499	4.52e-29	ModerateSignicant
Golm1	-0.485891	0.013959	ModerateSignicant
Srd5a1	-1.46979	3.34e-12	ModerateSignicant
Oit1	-0.309964	0.491106	ModerateSignicant
Clu	0.751924	3.38e-05	ModerateSignicant
Sdf2l1	-1.37208	2.73e-09	ModerateSignicant
Krt7	-1.11979	4.89e-09	ModerateSignicant
Clec4n	2.24077	0.000487053	ModerateSignicant
Tnfrsf12a	-0.396429	0.163664	ModerateSignicant
Abcg1	2.4042	1.63e-12	ModerateSignicant
Hbegf	0.261606	0.468555	ModerateSignicant
Psat1	-3.1204	4.86e-80	ModerateSignicant
Hells	-0.881127	0.00479427	ModerateSignicant
Fn3k	2.25662	3.47e-08	ModerateSignicant
Nab2	-1.98502	1.79e-28	ModerateSignicant
Slc15a1	-2.90529	6.94e-16	ModerateSignicant
Slco3a1	1.57141	5.39e-14	ModerateSignicant
Il18rap	-3.51419	2.1e-29	ModerateSignicant
Slc23a3	-1.30681	7.98e-08	ModerateSignicant
Lamc2	-2.12551	3.67e-54	ModerateSignicant
Dpt	2.08016	0.000327045	ModerateSignicant
Mrc1	1.09153	0.0404693	ModerateSignicant
Vim	2.27277	2.74e-06	ModerateSignicant
Procr	-3.96818	3.09e-17	ModerateSignicant
Cks1b	-1.70812	3.29e-12	ModerateSignicant
Gem	2.64806	8.87e-12	ModerateSignicant
Atp6v0d2	1.98258	8.35e-05	ModerateSignicant
Tmod1	2.06381	1.55e-05	ModerateSignicant
Tpm2	-2.67882	1.44e-22	ModerateSignicant
Laptm5	2.18078	0.000167988	ModerateSignicant
Mycl	2.11839	6.04e-11	ModerateSignicant
Tspan1	-0.939955	5.1e-09	ModerateSignicant
Areg	-2.9999	1.14e-30	ModerateSignicant
Cit	-1.6573	6.8e-05	ModerateSignicant
Tfec	1.78375	0.00424921	ModerateSignicant
Pcolce	-0.665223	2.1e-05	ModerateSignicant
Arhgap25	2.02908	0.00146021	ModerateSignicant
Cidec	0.926965	0.192182	ModerateSignicant
Pcsk6	-3.28055	8.13e-55	ModerateSignicant
Mesp2	0.520473	0.412132	ModerateSignicant
Tyrobp	2.53121	6.21e-06	ModerateSignicant
X2200002D01Rik	-1.07235	7.89e-12	ModerateSignicant
Ccdc83	-2.96334	4.4e-13	ModerateSignicant
Il4ra	-1.50112	4.18e-17	ModerateSignicant
Rnf141	-0.135174	0.741481	ModerateSignicant
Smarca1	-0.291601	0.506384	ModerateSignicant
Mcf2l	0.798985	1.52e-06	ModerateSignicant
Pdgfrl	0.417922	0.47227	ModerateSignicant
Fam192a	0.163777	0.535044	ModerateSignicant
Phip	-0.0806118	0.897244	ModerateSignicant
Gpr19	0.292425	0.62183	ModerateSignicant
Card10	1.31763	1.21e-11	ModerateSignicant
Ppip5k1	-0.130479	0.645053	ModerateSignicant
Ints14	-0.00639273	1	ModerateSignicant
Zdhhc14	2.45554	1.81e-07	ModerateSignicant
Smc4	-0.982465	5.7e-05	ModerateSignicant
Pawr	-0.494003	0.0165312	ModerateSignicant
Greb1	-0.44251	0.724132	ModerateSignicant
Entpd8	-1.55688	2.74e-06	ModerateSignicant
Rbmxl1	0.015281	1	ModerateSignicant
Adam32	0.573726	0.538601	ModerateSignicant
Rcor1	0.140945	0.569472	ModerateSignicant
Wnk2	1.4689	0.00720946	ModerateSignicant
Glra3	-0.259413	0.865961	ModerateSignicant
Ubn2	0.109993	0.827286	ModerateSignicant
Akap2	2.28421	8.49e-09	ModerateSignicant
Vill	0.202294	0.436818	ModerateSignicant
Zscan2	0.595878	0.0275435	ModerateSignicant
Cpq	0.461673	0.0128685	ModerateSignicant
Gjb6	-2.32073	3.53e-05	ModerateSignicant
Fbxl4	0.0605482	0.946607	ModerateSignicant
Iqsec3	0.411611	0.736172	ModerateSignicant
S100g	1.74542	1.42e-14	ModerateSignicant
Mill2	0.558702	0.108797	ModerateSignicant
Zfp598	-0.146603	0.531612	ModerateSignicant
Myo3b	-0.143208	0.92375	ModerateSignicant
Tmem183a	-0.225852	0.287769	ModerateSignicant
Tfap2e	0.618955	0.883817	ModerateSignicant
Snai1	-0.0298754	1	ModerateSignicant
Lysmd4	0.139309	0.853376	ModerateSignicant
Olfr734	0.507265	0.626892	ModerateSignicant
Krt14	-0.357654	0.918674	ModerateSignicant
Togaram2	-0.379526	0.517412	ModerateSignicant
Gm20715	-2.30172	1.21e-11	ModerateSignicant
Rprml	0.0763246	1	ModerateSignicant
A2ml1	-2.00908	4.37e-06	ModerateSignicant
Zfp358	0.668821	0.00141584	ModerateSignicant
Spata33	-0.998975	0.329798	ModerateSignicant
Sprr1a	-2.98608	7.93e-69	ModerateSignicant
Mmp13	-5.3438	1.34e-14	ModerateSignicant
Phospho1	1.00711	0.00772648	ModerateSignicant
Hs3st1	-0.99373	2.72e-07	ModerateSignicant
Fhad1	1.39349	0.0803052	ModerateSignicant
Mapk11	-1.76297	1.24e-13	ModerateSignicant
Fam83e	0.199769	0.390887	ModerateSignicant
Sytl5	-0.847182	0.00480832	ModerateSignicant
Adam12	-2.91392	6.96e-19	ModerateSignicant
Abcd2	1.42132	0.0795012	ModerateSignicant
Fmnl1	0.673663	0.256909	ModerateSignicant
Fut2	-1.10495	1.76e-14	ModerateSignicant
B4galt6	-0.658907	0.000146146	ModerateSignicant
AI504432	1.43956	0.0326693	ModerateSignicant
Gpc6	-4.51423	2.78e-53	ModerateSignicant
Alox5ap	2.56865	8.35e-12	ModerateSignicant
Samd5	-3.64211	9.92e-47	ModerateSignicant
Rab44	2.6873	8.42e-09	ModerateSignicant
Hvcn1	3.26499	1.14e-05	ModerateSignicant
Mpzl3	-0.237317	0.236596	ModerateSignicant
Ccnd1	-1.49818	1.33e-21	ModerateSignicant
Ahnak2	-1.42716	4.24e-15	ModerateSignicant
Prob1	1.18327	0.00569829	ModerateSignicant
Gm10644	2.15695	0.000769735	ModerateSignicant
Ly6a	-2.70948	4.98e-18	ModerateSignicant
Mroh2a	-0.327317	0.501506	ModerateSignicant
Lrrc10b	-3.92111	2.59e-18	ModerateSignicant
Ly6g6c	-1.88676	1.99e-11	ModerateSignicant
Ptgs2os2	-3.50173	1.24e-24	ModerateSignicant
Pcdhgc5	-3.69205	3.5e-15	ModerateSignicant
Flt3l	-0.606612	0.404094	ModerateSignicant

## Sheet: BPN-volcano-supplementary
Differentially expressed genes between BPN control and BPN treated
Genes	logFC	PValue	Significant
Ivl	-7.61069	1.05301e-271	HighSignicant
S100a6	-1.3292	3.33e-19	HighSignicant
Uhrf1	-1.21937	6.03e-07	HighSignicant
Ube2c	-1.9526	2.59e-10	HighSignicant
Edar	2.76358	4.15e-07	HighSignicant
Rab3b	-1.21114	0.152678	HighSignicant
Bcan	1.20569	0.138097	HighSignicant
Epor	-3.39958	1.01e-14	HighSignicant
Wnt3a	4.47624	1.78e-14	HighSignicant
Acaa1b	-1.41719	0.000483189	HighSignicant
Slc5a1	0.00343497	1	HighSignicant
Kif11	-1.80996	6.2e-08	HighSignicant
Pax5	3.29357	0.00344051	HighSignicant
Aldh1a3	-3.59847	8.61e-36	HighSignicant
Itga2	-1.64058	2.87e-22	HighSignicant
Awat1	2.12919	0.0103707	HighSignicant
Etv4	-1.31304	2.34e-14	HighSignicant
Hnf4a	0.133614	0.650727	HighSignicant
Cdk1	-1.96928	4.82e-11	HighSignicant
Arg1	-0.070426	1	HighSignicant
Ifi27l2b	-1.21678	7.78e-07	HighSignicant
Hecw1	-3.63371	4.51e-25	HighSignicant
Itih4	1.5704	9.04e-09	HighSignicant
Pbk	-1.83754	4.35e-08	HighSignicant
Cldn10	1.89939	0.00145567	HighSignicant
Gzme	-10.4197	3.05e-50	HighSignicant
Mcpt8	-6.64742	3.07e-27	HighSignicant
Slc7a8	2.32072	1.29e-08	HighSignicant
C6	3.51553	2.62e-16	HighSignicant
Col14a1	0.986685	0.0454536	HighSignicant
Arc	0.419807	0.39383	HighSignicant
Cdca3	-1.48834	9.36e-05	HighSignicant
Smoc2	3.13613	1.55e-08	HighSignicant
Tff1	-2.94794	1.1e-73	HighSignicant
Adcyap1	-4.69386	1.12e-44	HighSignicant
Celf4	-2.65852	1.31e-60	HighSignicant
Cep55	-1.92761	3.45e-09	HighSignicant
Pik3ap1	2.65435	3.29e-26	HighSignicant
Cbr2	4.6259	7.46e-18	HighSignicant
Ptprn	-7.18449	1.43e-63	HighSignicant
Bok	-0.185546	0.444586	HighSignicant
Mixl1	-2.32196	3.21e-11	HighSignicant
Lamc3	-2.59704	0.0256558	HighSignicant
Hc	2.70069	6.16e-34	HighSignicant
Nusap1	-1.25882	0.0234314	HighSignicant
Knstrn	-1.55021	4.71e-10	HighSignicant
Ccna2	-1.68965	2.08e-08	HighSignicant
Hmgcs2	2.19741	0.000339255	HighSignicant
Tdo2	-3.23054	4.97e-14	HighSignicant
Ecm1	-2.8665	6.14e-36	HighSignicant
Col15a1	-7.42834	3.56e-92	HighSignicant
Zfp618	1.55003	3.41e-05	HighSignicant
Aqp3	-3.37724	3.3e-23	HighSignicant
Npr2	2.43638	1.82e-11	HighSignicant
Cyp4b1	3.20697	1.27e-15	HighSignicant
Ereg	-5.02101	2.98e-35	HighSignicant
Gkn2	-4.49763	3.06e-38	HighSignicant
Mesp1	1.7771	0.00116526	HighSignicant
Ern2	1.02306	4.6e-10	HighSignicant
Art1	1.86361	0.0570143	HighSignicant
Tnni2	-0.405088	0.146559	HighSignicant
N4bp1	0.0788004	0.808566	HighSignicant
Cdh5	0.55881	0.269495	HighSignicant
Apoc3	0.647069	0.944651	HighSignicant
Rnf111	0.103987	0.75273	HighSignicant
Fam81a	0.260968	0.768414	HighSignicant
Slco2a1	-1.35431	1.09e-15	HighSignicant
Ttll4	0.24869	0.309605	HighSignicant
Prss55	-0.147666	1	HighSignicant
Kcnc2	-0.214813	0.990509	HighSignicant
H2.Q4	-0.391781	0.227883	HighSignicant
Decr2	0.140895	0.782496	HighSignicant
Cfap221	-1.19457	0.354377	HighSignicant
Mex3c	0.750643	8.55e-06	HighSignicant
Kin	0.315961	0.296638	HighSignicant
Kcnmb2	0.498064	0.957179	HighSignicant
Fdxacb1	0.308276	0.459659	HighSignicant
Atg9b	-3.10539	5.85e-38	HighSignicant
Saxo2	-0.214506	0.829448	HighSignicant
Sccpdh	-0.27489	0.43278	HighSignicant
Hrh3	0.335129	0.993167	HighSignicant
X1110008P14Rik	-1.32813	1.05e-11	HighSignicant
Clstn1	0.746812	5.06e-06	HighSignicant
Cep78	0.431274	0.222943	HighSignicant
Armc5	-0.173854	0.51237	HighSignicant
Upk3b	-0.134824	0.901887	HighSignicant
Nemp2	0.42569	0.251067	HighSignicant
Acot6	0.181002	0.856625	HighSignicant
Olfr545	-0.492577	0.725596	HighSignicant
H1fx	-1.12657	0.00339174	HighSignicant
Acer1	-0.336389	0.97612	HighSignicant
Olfml2a	0.0876905	0.993082	HighSignicant
Bst2	-0.953093	0.0158768	HighSignicant
Serpinb13	-0.650432	0.299333	HighSignicant
Gm8186	0.535569	0.0262094	HighSignicant
Bmpr1b	0.655598	0.410207	HighSignicant
Hunk	-1.85667	0.0140785	HighSignicant
Fabp1	2.95287	0.000353848	HighSignicant
Spock2	3.1883	1.69e-21	HighSignicant
Olfr224	-5.87854	1.01e-12	HighSignicant
Tmem40	-0.687193	0.0289981	HighSignicant
Ppp1r1b	3.51115	2.08e-31	HighSignicant
Fabp4	2.33594	0.000181726	HighSignicant
Chia1	1.6671	1.27e-07	HighSignicant
Aox3	2.56257	5.22e-12	HighSignicant
Cyp4a12a	1.69277	0.0499452	HighSignicant
X6030419C18Rik	-0.644947	0.254949	HighSignicant
Cryba4	2.60408	0.141794	HighSignicant
Ear2	2.96156	8e-06	HighSignicant
Ear1	3.54263	4.29e-06	HighSignicant
Hbb.bt	1.37638	0.113691	HighSignicant
Arhgap40	-0.409536	0.0221942	HighSignicant
Cyp4a12b	4.08937	0.000322246	HighSignicant
Kcnj13	3.24716	5.15e-16	HighSignicant
A930018M24Rik	1.65531	0.0285686	HighSignicant
Gcnt4	-1.94926	1.42e-27	HighSignicant
Gm3752	6.21731	0.0128449	HighSignicant
E030044B06Rik	3.13186	0.00169994	HighSignicant
Gm43064	2.16832	0.116143	HighSignicant
Gm32633	2.0896	0.00362057	HighSignicant
Gm45332	1.56869	0.158232	HighSignicant
Itgb2	1.91513	0.00326558	ModerateSignicant
Ckmt1	-0.431707	0.0235799	ModerateSignicant
Acvrl1	1.46641	5.07e-05	ModerateSignicant
Spi1	2.14407	4.74e-05	ModerateSignicant
Gnmt	0.906838	0.0220147	ModerateSignicant
Lamb1	-3.15067	2.46e-19	ModerateSignicant
Prkar2b	1.53456	1.43e-10	ModerateSignicant
St8sia6	-2.55969	7.94e-48	ModerateSignicant
P2rx5	0.769168	0.106927	ModerateSignicant
Htra1	0.992456	0.0127005	ModerateSignicant
Fbln1	0.767656	0.0641916	ModerateSignicant
Bcas1	-1.14646	3.26e-14	ModerateSignicant
Abca1	3.11189	1.52e-17	ModerateSignicant
Lpl	2.30634	7.06e-05	ModerateSignicant
Stk32c	1.03993	0.214951	ModerateSignicant
Plxdc1	2.17584	9.45e-05	ModerateSignicant
Cyth4	1.85425	0.0010699	ModerateSignicant
Lsp1	2.25432	0.000146146	ModerateSignicant
Ccl6	1.85986	0.000158629	ModerateSignicant
Scn1b	-1.84874	1.11e-11	ModerateSignicant
Dusp6	-2.71928	6.02e-47	ModerateSignicant
Vnn3	0.893093	0.0705401	ModerateSignicant
Ntn4	0.7866	6.47e-06	ModerateSignicant
Aldh1l2	0.60365	0.422117	ModerateSignicant
Havcr2	2.09351	7.01e-05	ModerateSignicant
Ace	-2.87803	1.68e-58	ModerateSignicant
Krt19	-0.202747	0.348003	ModerateSignicant
Fbln5	0.811719	0.0132668	ModerateSignicant
Evl	2.36499	4.52e-29	ModerateSignicant
Golm1	-0.485891	0.013959	ModerateSignicant
Srd5a1	-1.46979	3.34e-12	ModerateSignicant
Oit1	-0.309964	0.491106	ModerateSignicant
Clu	0.751924	3.38e-05	ModerateSignicant
Sdf2l1	-1.37208	2.73e-09	ModerateSignicant
Krt7	-1.11979	4.89e-09	ModerateSignicant
Clec4n	2.24077	0.000487053	ModerateSignicant
Tnfrsf12a	-0.396429	0.163664	ModerateSignicant
Abcg1	2.4042	1.63e-12	ModerateSignicant
Hbegf	0.261606	0.468555	ModerateSignicant
Psat1	-3.1204	4.86e-80	ModerateSignicant
Hells	-0.881127	0.00479427	ModerateSignicant
Fn3k	2.25662	3.47e-08	ModerateSignicant
Nab2	-1.98502	1.79e-28	ModerateSignicant
Slc15a1	-2.90529	6.94e-16	ModerateSignicant
Slco3a1	1.57141	5.39e-14	ModerateSignicant
Il18rap	-3.51419	2.1e-29	ModerateSignicant
Slc23a3	-1.30681	7.98e-08	ModerateSignicant
Lamc2	-2.12551	3.67e-54	ModerateSignicant
Dpt	2.08016	0.000327045	ModerateSignicant
Mrc1	1.09153	0.0404693	ModerateSignicant
Vim	2.27277	2.74e-06	ModerateSignicant
Procr	-3.96818	3.09e-17	ModerateSignicant
Cks1b	-1.70812	3.29e-12	ModerateSignicant
Gem	2.64806	8.87e-12	ModerateSignicant
Atp6v0d2	1.98258	8.35e-05	ModerateSignicant
Tmod1	2.06381	1.55e-05	ModerateSignicant
Tpm2	-2.67882	1.44e-22	ModerateSignicant
Laptm5	2.18078	0.000167988	ModerateSignicant
Mycl	2.11839	6.04e-11	ModerateSignicant
Tspan1	-0.939955	5.1e-09	ModerateSignicant
Areg	-2.9999	1.14e-30	ModerateSignicant
Cit	-1.6573	6.8e-05	ModerateSignicant
Tfec	1.78375	0.00424921	ModerateSignicant
Pcolce	-0.665223	2.1e-05	ModerateSignicant
Arhgap25	2.02908	0.00146021	ModerateSignicant
Cidec	0.926965	0.192182	ModerateSignicant
Pcsk6	-3.28055	8.13e-55	ModerateSignicant
Mesp2	0.520473	0.412132	ModerateSignicant
Tyrobp	2.53121	6.21e-06	ModerateSignicant
X2200002D01Rik	-1.07235	7.89e-12	ModerateSignicant
Ccdc83	-2.96334	4.4e-13	ModerateSignicant
Il4ra	-1.50112	4.18e-17	ModerateSignicant
Rnf141	-0.135174	0.741481	ModerateSignicant
Smarca1	-0.291601	0.506384	ModerateSignicant
Mcf2l	0.798985	1.52e-06	ModerateSignicant
Pdgfrl	0.417922	0.47227	ModerateSignicant
Fam192a	0.163777	0.535044	ModerateSignicant
Phip	-0.0806118	0.897244	ModerateSignicant
Gpr19	0.292425	0.62183	ModerateSignicant
Card10	1.31763	1.21e-11	ModerateSignicant
Ppip5k1	-0.130479	0.645053	ModerateSignicant
Ints14	-0.00639273	1	ModerateSignicant
Zdhhc14	2.45554	1.81e-07	ModerateSignicant
Smc4	-0.982465	5.7e-05	ModerateSignicant
Pawr	-0.494003	0.0165312	ModerateSignicant
Greb1	-0.44251	0.724132	ModerateSignicant
Entpd8	-1.55688	2.74e-06	ModerateSignicant
Rbmxl1	0.015281	1	ModerateSignicant
Adam32	0.573726	0.538601	ModerateSignicant
Rcor1	0.140945	0.569472	ModerateSignicant
Wnk2	1.4689	0.00720946	ModerateSignicant
Glra3	-0.259413	0.865961	ModerateSignicant
Ubn2	0.109993	0.827286	ModerateSignicant
Akap2	2.28421	8.49e-09	ModerateSignicant
Vill	0.202294	0.436818	ModerateSignicant
Zscan2	0.595878	0.0275435	ModerateSignicant
Cpq	0.461673	0.0128685	ModerateSignicant
Gjb6	-2.32073	3.53e-05	ModerateSignicant
Fbxl4	0.0605482	0.946607	ModerateSignicant
Iqsec3	0.411611	0.736172	ModerateSignicant
S100g	1.74542	1.42e-14	ModerateSignicant
Mill2	0.558702	0.108797	ModerateSignicant
Zfp598	-0.146603	0.531612	ModerateSignicant
Myo3b	-0.143208	0.92375	ModerateSignicant
Tmem183a	-0.225852	0.287769	ModerateSignicant
Tfap2e	0.618955	0.883817	ModerateSignicant
Snai1	-0.0298754	1	ModerateSignicant
Lysmd4	0.139309	0.853376	ModerateSignicant
Olfr734	0.507265	0.626892	ModerateSignicant
Krt14	-0.357654	0.918674	ModerateSignicant
Togaram2	-0.379526	0.517412	ModerateSignicant
Gm20715	-2.30172	1.21e-11	ModerateSignicant
Rprml	0.0763246	1	ModerateSignicant
A2ml1	-2.00908	4.37e-06	ModerateSignicant
Zfp358	0.668821	0.00141584	ModerateSignicant
Spata33	-0.998975	0.329798	ModerateSignicant
Sprr1a	-2.98608	7.93e-69	ModerateSignicant
Mmp13	-5.3438	1.34e-14	ModerateSignicant
Phospho1	1.00711	0.00772648	ModerateSignicant
Hs3st1	-0.99373	2.72e-07	ModerateSignicant
Fhad1	1.39349	0.0803052	ModerateSignicant
Mapk11	-1.76297	1.24e-13	ModerateSignicant
Fam83e	0.199769	0.390887	ModerateSignicant
Sytl5	-0.847182	0.00480832	ModerateSignicant
Adam12	-2.91392	6.96e-19	ModerateSignicant
Abcd2	1.42132	0.0795012	ModerateSignicant
Fmnl1	0.673663	0.256909	ModerateSignicant
Fut2	-1.10495	1.76e-14	ModerateSignicant
B4galt6	-0.658907	0.000146146	ModerateSignicant
AI504432	1.43956	0.0326693	ModerateSignicant
Gpc6	-4.51423	2.78e-53	ModerateSignicant
Alox5ap	2.56865	8.35e-12	ModerateSignicant
Samd5	-3.64211	9.92e-47	ModerateSignicant
Rab44	2.6873	8.42e-09	ModerateSignicant
Hvcn1	3.26499	1.14e-05	ModerateSignicant
Mpzl3	-0.237317	0.236596	ModerateSignicant
Ccnd1	-1.49818	1.33e-21	ModerateSignicant
Ahnak2	-1.42716	4.24e-15	ModerateSignicant
Prob1	1.18327	0.00569829	ModerateSignicant
Gm10644	2.15695	0.000769735	ModerateSignicant
Ly6a	-2.70948	4.98e-18	ModerateSignicant
Mroh2a	-0.327317	0.501506	ModerateSignicant
Lrrc10b	-3.92111	2.59e-18	ModerateSignicant
Ly6g6c	-1.88676	1.99e-11	ModerateSignicant
Ptgs2os2	-3.50173	1.24e-24	ModerateSignicant
Pcdhgc5	-3.69205	3.5e-15	ModerateSignicant
Flt3l	-0.606612	0.404094	ModerateSignicant
