# Supplementary material for: An NKX2-1/ERK/WNT feedback loop modulates gastric identity and response to targeted therapy in lung adenocarcinoma
Source: eLife. 2021 Apr 6;10:e66788. doi: 10.7554/eLife.66788 (PMC8102067; doi:10.7554/eLife.66788)
Supplement: Supplementary file 3. [file elife-66788-supp3.xlsx]

## Sheet: Tumor clusters 1 to 8
Supplementary File 3 - Top 10 upregulated genes per cluster in scRNA-seq
			CLUSTER 2			CLUSTER 1			CLUSTER 4			CLUSTER 5			CLUSTER 7			CLUSTER 6			CLUSTER 3			CLUSTER 8
FeatureID	FeatureName	2 Average	2 Log2 Fold Change	2 P-Value	1 Average	1 Log2 Fold Change	1 P-Value	4 Average	4 Log2 Fold Change	4 P-Value	5 Average	5 Log2 Fold Change	5 P-Value	7 Average	7 Log2 Fold Change	7 P-Value	6 Average	6 Log2 Fold Change	6 P-Value	3 Average	3 Log2 Fold Change	3 P-Value	8 Average	8 Log2 Fold Change	8 P-Value
ENSMUSG00000028255	Clca1	0.327628	-3.54434	1.84181e-34	11.1907	2.40929	6.31561e-36	0.480832	-2.83938	1.04859e-07	0.061727	-5.76664	9.47589e-14	0.018157	-7.30568	2.98209e-05	0.0620124	-5.72643	8.87096e-08	1.49955	-1.16206	0.263515	0.0532288	-5.77905	1
ENSMUSG00000025091	Pnliprp2	0.0314977	-3.55791	3.51927e-33	1.07945	2.37547	5.70901e-36	0.108957	-1.60443	0.00219188	0.0275567	-3.54081	5.15484e-07	0.0090785	-4.75773	0.00565474	0.0124025	-4.54085	1.8139e-05	0.147624	-1.14021	0.373092	0	-5.42429	1
ENSMUSG00000061825	Ces2c	0.0676426	-3.40331	1.28072e-33	2.06692	2.36261	1.85825e-37	0.127906	-2.32842	3.39685e-06	0.0507043	-3.63116	8.00015e-08	0.00605234	-6.11741	0.000214048	0.024805	-4.57822	4.59052e-06	0.185177	-1.76705	0.0342269	0	-6.36859	0.652498
ENSMUSG00000030050	Gkn1	1.48788	-4.55516	1.54583e-53	98.6788	2.33485	3.1327e-36	4.51776	-2.79131	9.6358e-09	0.458543	-6.07798	1.83086e-16	0.14223	-7.71026	1.63768e-06	0.607721	-5.65222	1.4183e-08	35.409	0.248365	1	0.441039	-6.0786	0.836613
ENSMUSG00000022226	Mcpt2	0.111017	-3.09338	1.05857e-27	2.70837	2.32995	4.52881e-34	0.163435	-2.38565	4.65761e-06	0.0286589	-4.84163	8.56212e-11	0.0151308	-5.52564	0.0011583	0.0602406	-3.76316	0.000233125	0.309492	-1.43509	0.16094	0.060833	-3.60651	1
ENSMUSG00000030049	Gkn2	1.50931	-4.09559	9.83067e-47	71.1355	2.2698	1.62981e-34	4.13563	-2.48132	1.7965e-07	0.40343	-5.82719	7.94235e-16	0.160387	-7.10539	5.65421e-06	0.460663	-5.61566	1.20941e-08	31.0204	0.502184	0.767902	0.942911	-4.56035	1
ENSMUSG00000049128	Ivl	0.00542174	-7.51654	1.40481e-85	2.74416	2.18541	2.44082e-31	0.519519	-0.796643	0.221216	1.14305	0.385694	0.795218	0	-8.21377	5.13712e-06	0.0318921	-4.74853	1.85192e-06	0.164458	-2.4531	0.00105157	0.342185	-1.3534	1
ENSMUSG00000024032	Tff1	26.3445	-2.66739	6.44927e-26	450.687	2.17025	5.20111e-33	24.0163	-2.66721	9.46182e-09	4.73534	-4.99889	6.81722e-15	3.13511	-5.56371	6.34221e-06	10.7087	-3.80228	4.28605e-06	198.643	0.457272	0.818118	2.45613	-5.90837	0.668145
ENSMUSG00000027399	Il1a	0.0209124	-4.24512	1.24642e-43	1.02296	2.08217	3.62023e-28	0.0884288	-2.00316	6.41079e-05	0.274465	-0.332851	1	0.0151308	-4.26661	0.00948828	0.0106307	-4.82788	3.35059e-06	0.145034	-1.26126	0.238462	0.00760412	-4.51826	1
ENSMUSG00000074183	Gsta1	2.45579	-1.57717	5.27062e-11	18.7821	1.98218	4.90223e-27	1.01693	-2.75875	3.35474e-09	0.821189	-3.05045	1.02221e-06	0.311695	-4.41116	0.00270217	0.869945	-2.9496	0.00140403	8.76161	0.42308	0.871739	0.0988535	-5.97104	0.6478
FeatureID	FeatureName	2 Average	2 Log2 Fold Change	2 P-Value	1 Average	1 Log2 Fold Change	1 P-Value	4 Average	4 Log2 Fold Change	4 P-Value	5 Average	5 Log2 Fold Change	5 P-Value	7 Average	7 Log2 Fold Change	7 P-Value	6 Average	6 Log2 Fold Change	6 P-Value	3 Average	3 Log2 Fold Change	3 P-Value	8 Average	8 Log2 Fold Change	8 P-Value
ENSMUSG00000046213	Cym	8.51781	2.13653	5.05095e-20	0.0502756	-6.05481	5.73835e-40	0.00157909	-10.3447	1.28793e-23	0.0628292	-5.56864	2.7826e-08	0.490239	-2.58853	0.668999	1.00637	-1.56098	0.759804	0.975095	-1.61485	0.340623	0	-8.6064	1
ENSMUSG00000023987	Pgc	3.44745	1.79206	1.4249e-19	0.118295	-3.71073	8.21065e-30	0.0157909	-6.4353	2.75309e-21	0.00220453	-8.74145	6.56816e-19	1.44651	0.0844964	1	2.06413	0.613031	0.89664	0.789917	-0.806244	0.800219	0.00760412	-6.50514	1
ENSMUSG00000021367	Edn1	1.05259	1.76053	2.09851e-21	0.0369673	-3.68894	2.9194e-32	0.0797438	-2.45075	1.24599e-06	0.099204	-2.11491	0.001391	0.169465	-1.30701	0.897368	0.366759	-0.203002	1	0.137264	-1.63914	0.0594202	0.0456247	-3.00523	1
ENSMUSG00000061808	Ttr	10.1208	1.67552	1.7448e-20	1.43729	-1.6886	5.02563e-11	0.101061	-5.44254	2.93027e-22	0.0275567	-7.25276	2.56111e-21	1.31638	-1.6922	0.580894	3.90678	-0.113168	1	3.80844	-0.151354	1	0.0152082	-7.54723	0.262441
ENSMUSG00000058952	Cfi	5.98818	1.63012	1.87251e-19	1.02769	-1.43195	1.74249e-08	0.0844811	-4.97027	9.81181e-20	0.0407839	-5.97683	6.52997e-17	0.795882	-1.68802	0.576007	2.27674	-0.164792	1	1.9994	-0.357819	1	0.0836453	-4.81905	1
ENSMUSG00000028195	Ccn1	2.64374	1.56806	1.19916e-17	0.189273	-2.77914	2.27514e-23	0.489517	-1.2796	0.0110424	0.242499	-2.28787	0.00026016	1.67044	0.53902	0.859509	0.930186	-0.318351	1	0.709631	-0.719044	0.790245	0.334581	-1.77118	1
ENSMUSG00000027188	Pamr1	1.0118	1.5583	3.35002e-17	0.153193	-1.66913	3.1209e-10	0.00789543	-5.74863	2.79577e-20	0.0187385	-4.53531	1.04653e-10	0.184596	-1.25812	0.8998	0.430543	-0.0421344	1	0.297838	-0.586369	0.953386	0	-5.88607	0.662491
ENSMUSG00000035165	Kcne3	2.93729	1.47466	1.84563e-15	0.737276	-0.956075	0.000213954	0.0592157	-4.55119	4.18208e-17	0.0385794	-5.12892	1.66227e-13	0.396428	-1.76308	0.53811	0.99397	-0.438705	1	1.54487	0.211999	1	0.144478	-3.15628	1
ENSMUSG00000024028	Tff2	56.13	1.45262	4.06674e-15	15.3346	-0.840405	0.00120174	1.49066	-4.1857	8.38549e-17	0.473975	-5.81878	7.62779e-17	8.52774	-1.61682	0.391992	24.4807	-0.083222	1	21.4922	-0.276172	1	0.326977	-6.29042	0.550878
ENSMUSG00000028716	Pdzk1ip1	8.69647	1.43725	7.16819e-15	2.49958	-0.771991	0.00309988	0.285025	-3.88846	2.9181e-14	0.332885	-3.64401	8.9278e-09	1.83083	-1.15243	0.961667	3.32564	-0.286579	1	2.89032	-0.495339	0.94216	0.152082	-4.67747	1
FeatureID	FeatureName	2 Average	2 Log2 Fold Change	2 P-Value	1 Average	1 Log2 Fold Change	1 P-Value	4 Average	4 Log2 Fold Change	4 P-Value	5 Average	5 Log2 Fold Change	5 P-Value	7 Average	7 Log2 Fold Change	7 P-Value	6 Average	6 Log2 Fold Change	6 P-Value	3 Average	3 Log2 Fold Change	3 P-Value	8 Average	8 Log2 Fold Change	8 P-Value
ENSMUSG00000020330	Hmmr	0.00387267	-5.17045	2.19985e-43	0.0133082	-3.40556	2.16401e-24	0.0378981	-1.76681	0.00107569	0.0099204	-3.575	2.19704e-06	0.00302617	-4.41312	0.0177319	0.00354356	-4.61153	7.27331e-05	1.48919	4.13295	9.43301e-45	1.52082	3.66251	4.68835e-07
ENSMUSG00000027306	Nusap1	0.00309814	-5.25639	4.77609e-40	0.00295739	-5.27045	7.78879e-35	0.0213177	-2.36751	3.8301e-05	0	-6.6868	4.77809e-10	0.00605234	-3.61347	0.0836032	0.00177178	-4.98276	9.40944e-05	1.27034	4.10978	6.99017e-41	1.55124	3.92236	4.07625e-08
ENSMUSG00000027469	Tpx2	0.00748716	-4.47432	1.02992e-38	0.0091679	-4.15247	3.87584e-31	0.0339503	-2.14218	7.31349e-05	0.0286589	-2.35129	0.00100972	0.00605234	-4.04303	0.0311921	0.00885891	-3.82571	0.000569135	1.70674	4.10439	1.72388e-44	1.65009	3.55832	1.80711e-06
ENSMUSG00000027715	Ccna2	0.00335631	-5.18701	5.5299e-42	0.0109423	-3.5064	1.40357e-24	0.0402667	-1.50054	0.00677937	0.00440907	-4.40076	9.26703e-08	0.00302617	-4.23684	0.0269245	0	-6.02115	6.04935e-06	1.29495	4.09413	4.54637e-43	0.973327	3.17312	0.000138412
ENSMUSG00000041431	Ccnb1	0.00206542	-5.77036	1.73789e-44	0.0112381	-3.41123	2.15492e-23	0.0394771	-1.47162	0.0086797	0.0110227	-3.20363	2.20504e-05	0	-5.18091	0.00907036	0.00177178	-4.96421	6.0452e-05	1.22761	4.06282	8.31247e-41	1.49041	3.88047	3.15844e-08
ENSMUSG00000058773	Hist1h1b	0.0046472	-4.80483	4.06767e-34	0.00295739	-5.3692	9.7695e-33	0.0663216	-0.837041	0.310302	0.0187385	-2.60714	0.00158303	0.00605234	-3.71194	0.125327	0.0106307	-3.27146	0.0121528	1.32732	4.05621	3.10875e-36	1.37635	3.63312	9.10548e-06
ENSMUSG00000031004	Mki67	0.0441484	-3.64228	3.07544e-34	0.0831026	-2.68788	2.41108e-19	0.127116	-1.95565	0.000182263	0.0374771	-3.67928	2.40921e-07	0.0242093	-4.15434	0.0181523	0.0531535	-3.15131	0.00253167	5.26525	3.99597	1.72388e-44	4.67653	3.34952	2.05013e-05
ENSMUSG00000045328	Cenpe	0.0247851	-3.09192	2.78032e-25	0.0319398	-2.69197	2.90125e-18	0.0284235	-2.72656	7.34184e-07	0.0319657	-2.52931	0.000368596	0	-5.95765	0.00194238	0.0425228	-2.09034	0.0957509	2.03954	3.99548	1.83057e-42	1.71853	3.27291	5.38831e-05
ENSMUSG00000017716	Birc5	0.0108435	-5.10469	1.10687e-51	0.065654	-2.47067	2.13469e-17	0.140539	-1.24924	0.0222661	0.0275567	-3.55727	3.93058e-07	0	-6.77466	0.000230993	0.0106307	-4.75009	7.69164e-06	3.51319	3.94688	2.05358e-43	4.91226	4.01237	1.49571e-09
ENSMUSG00000030867	Plk1	0.00722898	-3.50822	1.34279e-25	0.00887216	-3.18248	5.95783e-20	0.0165804	-2.13794	0.00016651	0.0066136	-3.29959	3.18456e-05	0.0090785	-2.62189	0.273384	0.00708713	-3.08302	0.00916998	0.784738	3.931	7.69605e-43	1.19385	4.13854	5.91602e-10
FeatureID	FeatureName	2 Average	2 Log2 Fold Change	2 P-Value	1 Average	1 Log2 Fold Change	1 P-Value	4 Average	4 Log2 Fold Change	4 P-Value	5 Average	5 Log2 Fold Change	5 P-Value	7 Average	7 Log2 Fold Change	7 P-Value	6 Average	6 Log2 Fold Change	6 P-Value	3 Average	3 Log2 Fold Change	3 P-Value	8 Average	8 Log2 Fold Change	8 P-Value
ENSMUSG00000038530	Rgs4	0.000258178	-8.14361	4.02154e-55	0.00621051	-4.44715	1.81071e-32	1.06904	3.82924	7.02101e-54	0.066136	-0.909805	0.417449	0.0121047	-3.0568	0.135341	0.0106307	-3.35429	0.00253167	0.00388484	-4.62657	4.78873e-07	0.77562	2.68672	0.0072454
ENSMUSG00000029829	Tmem213	0.0134253	-5.49423	2.94361e-61	0.0118295	-5.63791	1.06221e-54	4.15773	3.6194	3.48397e-53	0.0584202	-3.19098	1.38273e-06	0.753516	0.528378	0.883415	0.455348	-0.209131	1	0.023309	-4.46172	9.48801e-09	4.13664	3.01903	0.000259269
ENSMUSG00000060962	Dmkn	0.0105853	-4.72716	3.36531e-37	0.013604	-4.33577	2.34745e-29	1.90201	3.57187	1.4864e-38	0.049602	-2.31882	0.00444792	0.0272355	-3.04135	0.262856	0.320693	0.400527	1	0.0168343	-3.8024	5.2426e-05	1.26228	2.3907	0.0822812
ENSMUSG00000021268	Meg3	0.0157489	-7.01029	5.2515e-83	0.0801452	-4.64232	2.48107e-44	13.0883	3.48371	5.91738e-46	1.12541	-0.660118	0.583803	1.7461	-0.00944682	1	1.52728	-0.205735	1	0.0349636	-5.64208	8.67863e-12	10.2199	2.56799	0.0216779
ENSMUSG00000056370	Sftpb	0.0908786	-7.70339	2.67794e-109	0.673397	-4.77869	7.96095e-53	114.065	3.36204	8.87314e-46	12.4181	-0.392528	0.916934	8.095	-1.00944	0.870575	35.1858	1.15972	0.0848804	0.394959	-5.39355	9.52688e-13	97.1882	2.6162	0.00934081
ENSMUSG00000062785	Kcnc3	0.0162652	-4.17797	3.53517e-41	0.0118295	-4.59751	5.81155e-40	1.78279	3.32722	6.41364e-42	0.0705451	-1.8792	0.0058409	0.205779	-0.304815	1	0.719344	1.54829	0.00274329	0.0194242	-3.67238	2.41732e-06	1.36114	2.43718	0.0216654
ENSMUSG00000002204	Napsa	0.0278832	-7.17259	1.03934e-95	0.0612179	-6.01075	7.43451e-68	23.7202	3.30115	2.4814e-43	0.570974	-2.63833	2.85049e-05	6.69086	0.968457	0.49633	11.6884	1.83618	0.000102298	0.104891	-5.06752	1.83594e-11	15.8698	2.21713	0.0968431
ENSMUSG00000029377	Ereg	0.0100689	-6.16974	2.89456e-69	0.147574	-2.25653	7.7703e-16	4.31643	3.28507	6.44327e-41	1.06699	0.789697	0.181453	0.311695	-1.02202	1	0.233875	-1.44841	0.372274	0.0802867	-2.99622	5.52065e-05	3.27738	2.3959	0.02661
ENSMUSG00000022018	Rgcc	0.0193633	-6.47019	2.75705e-81	0.0357844	-5.55766	1.15085e-59	10.0098	3.26643	5.83456e-42	0.908268	-0.725012	0.57318	4.45149	1.62288	0.0333724	2.46986	0.758523	0.570684	0.0284888	-5.68042	7.84925e-13	7.25433	2.31244	0.0627259
ENSMUSG00000002944	Cd36	0.0111017	-6.44566	1.27305e-76	0.0227719	-5.38945	2.6688e-55	5.63734	3.24362	5.51735e-41	0.436498	-0.972216	0.291078	0.850353	0.0139244	1	2.30332	1.50625	0.00549248	0.0310787	-4.74636	6.35711e-10	4.34956	2.39045	0.0232265
FeatureID	FeatureName	2 Average	2 Log2 Fold Change	2 P-Value	1 Average	1 Log2 Fold Change	1 P-Value	4 Average	4 Log2 Fold Change	4 P-Value	5 Average	5 Log2 Fold Change	5 P-Value	7 Average	7 Log2 Fold Change	7 P-Value	6 Average	6 Log2 Fold Change	6 P-Value	3 Average	3 Log2 Fold Change	3 P-Value	8 Average	8 Log2 Fold Change	8 P-Value
ENSMUSG00000015134	Aldh1a3	0.0433739	-3.00558	3.83245e-25	0.255814	-0.28276	0.493479	0.0979033	-1.6747	0.00182622	2.71819	3.65227	1.71992e-37	0.0211832	-3.67291	0.0493308	0.0513817	-2.54578	0.0231892	0.143739	-1.09365	0.447727	0.121666	-1.24983	1
ENSMUSG00000027611	Procr	0.00722898	-5.679	1.29517e-48	0.0437693	-3.06907	6.37443e-20	0.962453	1.7107	9.14793e-07	2.80527	3.56757	1.08678e-30	0.0665757	-2.25092	0.523109	0.0194896	-3.97523	0.000879349	0.0297838	-3.43674	0.000112495	0.410622	0.346343	1
ENSMUSG00000037613	Tnfrsf23	0.138642	-1.7329	9.02395e-12	0.485899	0.273886	0.378273	0.333187	-0.321949	0.888211	2.41397	2.82698	1.00668e-20	0.054471	-2.86519	0.119095	0.0442946	-3.19555	0.00113732	0.108775	-1.94212	0.0145939	0.190103	-1.07776	1
ENSMUSG00000030717	Nupr1	0.610591	-1.79977	5.44324e-13	1.70345	-0.178642	0.69018	1.55619	-0.300496	0.841102	10.7912	2.77619	6.25419e-20	1.21955	-0.645851	1	3.32386	0.830829	0.464589	0.493375	-1.97468	0.0117664	1.39916	-0.445219	1
ENSMUSG00000043421	Hilpda	0.161361	-1.6987	3.30398e-11	0.512219	0.144609	0.739889	0.270024	-0.82756	0.196526	2.47569	2.64087	4.28354e-17	0.124073	-1.90447	0.507392	0.116938	-2.01152	0.0829676	0.141149	-1.75466	0.037904	0.304165	-0.605391	1
ENSMUSG00000028108	Ecm1	0.134253	-2.61562	8.22992e-22	0.969135	0.505108	0.052705	0.912712	0.361429	0.625917	3.74991	2.61916	3.08756e-16	0.114994	-2.62988	0.214057	0.0513817	-3.79291	0.000172537	0.226616	-1.69253	0.0576809	0.562705	-0.349693	1
ENSMUSG00000026193	Fn1	0.343635	-0.49903	0.0910515	0.0946364	-2.45503	3.5496e-17	0.180805	-1.40094	0.00898128	2.41397	2.61666	3.61582e-16	0.130125	-1.82039	0.58941	0.113394	-2.03873	0.0918299	0.159278	-1.56331	0.0974983	0.0912494	-2.24917	1
ENSMUSG00000038508	Gdf15	0.0309814	-3.73686	3.23188e-34	0.0405162	-3.31653	2.14548e-25	1.46144	2.27729	8.07086e-15	1.81213	2.56834	1.12643e-14	0.0574972	-2.58617	0.258679	0.239191	-0.586176	1	0.0284888	-3.63146	7.25007e-06	0.889682	1.32394	1
ENSMUSG00000002289	Angptl4	0.0369194	-3.18734	2.48769e-29	0.466084	0.803721	0.000483952	0.166594	-0.841816	0.183823	1.44838	2.52792	4.47942e-15	0.0756542	-1.9161	0.491167	0.0318921	-3.15377	0.0016622	0.113955	-1.37607	0.165367	0.152082	-0.891214	1
ENSMUSG00000053398	Phgdh	0.305941	-0.588902	0.0299771	0.161769	-1.56335	4.54852e-09	0.355294	-0.311141	0.899095	2.13399	2.50673	1.89614e-15	0.108942	-1.98359	0.421488	0.281713	-0.639039	1	0.783443	0.877783	0.138556	0.950515	1.12968	1
FeatureID	FeatureName	2 Average	2 Log2 Fold Change	2 P-Value	1 Average	1 Log2 Fold Change	1 P-Value	4 Average	4 Log2 Fold Change	4 P-Value	5 Average	5 Log2 Fold Change	5 P-Value	7 Average	7 Log2 Fold Change	7 P-Value	6 Average	6 Log2 Fold Change	6 P-Value	3 Average	3 Log2 Fold Change	3 P-Value	8 Average	8 Log2 Fold Change	8 P-Value
ENSMUSG00000026874	Hc	0.00722898	-5.34837	4.67944e-47	0.00354886	-6.28139	6.10256e-47	0.13896	-0.932157	0.178303	0.0033068	-5.93556	7.27958e-11	0.89272	1.82554	0.0123502	4.69699	4.8665	1.41832e-57	0.00776968	-4.88761	1.12181e-07	0.106458	-1.20499	1
ENSMUSG00000030785	Cox6a2	0.00283996	-5.62182	3.53517e-41	0	-8.98356	5.27983e-45	0.0173699	-2.90422	2.31173e-06	0.0121249	-3.34564	4.15473e-05	0.565893	2.18948	0.00102278	2.31218	4.83145	1.02015e-51	0.0142444	-3.10568	0.000770428	0.114062	-0.107561	1
ENSMUSG00000021922	Itih4	0.0268505	-1.92412	4.60312e-09	0.000295739	-7.47494	1.7056e-34	0.0394771	-1.2259	0.101879	0.00110227	-5.42673	5.73507e-07	0.366166	2.06684	0.00736436	1.42451	4.53156	2.17705e-38	0.0116545	-2.85994	0.00748813	0.0228124	-1.60419	1
ENSMUSG00000037071	Scd1	0.128056	-4.93538	2.32248e-56	0.0544159	-6.13836	1.06768e-64	5.99026	0.895543	0.0230613	0.907166	-1.9243	0.00488049	14.1019	2.12915	0.000767136	47.4519	4.32322	7.95872e-46	0.221436	-3.95553	1.99579e-07	3.09488	-0.124062	1
ENSMUSG00000064294	Aox3	0.00593809	-5.13682	3.07216e-42	0.000887216	-7.49985	6.10573e-48	0.309501	0.786991	0.0704341	0.00771587	-4.45044	1.10882e-07	1.09245	2.64762	3.32837e-06	2.47164	4.19431	2.93876e-35	0.00258989	-5.62703	2.92756e-08	0.174895	-0.0393333	1
ENSMUSG00000062778	Chia1	0.00103271	-7.04659	2.13011e-45	0.00118295	-6.81862	9.62576e-39	0.329239	1.28218	0.00101309	0.0209431	-2.7646	0.00113207	0.644574	2.21957	0.00155513	1.87986	4.14386	4.55224e-29	0.0388484	-1.88811	0.100478	0.486664	1.77471	0.598583
ENSMUSG00000031661	Nkd1	0.00335631	-5.11145	1.9596e-40	0.00177443	-5.88717	6.40893e-39	0.18949	0.893364	0.0239233	0.00551134	-4.06188	5.48185e-07	0.50537	2.32068	8.52869e-05	1.32529	4.06145	1.29111e-36	0.00906462	-3.40584	8.35797e-05	0.106458	0.0860986	1
ENSMUSG00000025150	Cbr2	0.056541	-3.91472	3.13885e-34	0.00325312	-7.89906	1.37281e-63	0.114484	-2.7377	1.59597e-06	0.0209431	-5.11328	4.77809e-10	8.45814	3.7299	1.36496e-15	8.72071	3.96576	6.57947e-30	0.0466181	-3.98451	3.8219e-06	0.273748	-1.40315	1
ENSMUSG00000069515	Lyz1	0.00154907	-7.6973	5.18807e-24	0.00295739	-6.81654	1.02035e-18	1.38881	2.3976	1.55468e-05	0.00881814	-5.0582	0.009088	0.0514449	-2.56926	1	3.62861	3.88851	2.4253e-09	0.00647473	-5.40373	0.0296707	0.410622	0.382661	1
ENSMUSG00000013089	Etv5	0.0147161	-3.35828	1.04826e-27	0.0221804	-2.73261	1.94248e-18	0.371875	1.63032	1.95869e-07	0.0716474	-0.892245	0.429558	0.272355	1.0693	0.325997	1.37845	3.7174	5.59076e-29	0.0505029	-1.3859	0.198206	0.288957	1.1585	1
FeatureID	FeatureName	2 Average	2 Log2 Fold Change	2 P-Value	1 Average	1 Log2 Fold Change	1 P-Value	4 Average	4 Log2 Fold Change	4 P-Value	5 Average	5 Log2 Fold Change	5 P-Value	7 Average	7 Log2 Fold Change	7 P-Value	6 Average	6 Log2 Fold Change	6 P-Value	3 Average	3 Log2 Fold Change	3 P-Value	8 Average	8 Log2 Fold Change	8 P-Value
ENSMUSG00000037846	Rtkn2	0.00671263	-3.91266	9.73187e-27	0.00236591	-5.28091	7.00049e-31	0.0165804	-2.43702	8.37774e-05	0.0110227	-2.94195	0.000409166	3.04735	5.87685	7.41103e-69	0.0549252	-0.684696	1	0.00776968	-3.35656	0.000546707	0.00760412	-2.58567	1
ENSMUSG00000079465	Col4a3	0.00516356	-4.01207	1.30447e-26	0	-8.19141	1.03846e-36	0.125537	0.800546	0.0832278	0.016534	-2.13197	0.0108128	2.05779	5.3807	2.05705e-50	0.0992198	0.435604	1	0.00129495	-4.9025	8.00373e-06	0.0228124	-1.31965	1
ENSMUSG00000021186	Fbln5	0.00877805	-2.30199	2.53883e-11	0.00266165	-3.9179	1.49063e-18	0.0426353	0.154224	0.991297	0.0209431	-0.855189	0.59955	1.04403	5.3211	2.10202e-46	0.0389792	0.0543508	1	0.00647473	-2.37246	0.0324288	0.00760412	-1.3818	1
ENSMUSG00000021057	Akap5	0.0214288	-4.07367	1.12e-37	0.00680199	-5.66385	6.10256e-47	0.631634	1.08954	0.0025248	0.163136	-0.958859	0.376593	7.95882	5.21272	8.25677e-52	0.201983	-0.635186	1	0.0129495	-4.50355	1.27537e-07	0.159686	-0.920222	1
ENSMUSG00000067158	Col4a4	0.016007	-3.46871	2.21384e-27	0.00177443	-6.43103	1.81174e-43	0.264497	0.824154	0.0482027	0.0540111	-1.53071	0.0653843	3.72824	5.0938	2.80474e-46	0.271083	0.834214	0.438363	0.0155394	-3.24761	0.000170463	0.266144	0.81157	1
ENSMUSG00000037736	Limch1	0.0139416	-3.74441	6.57029e-31	0.00236591	-6.14372	1.89863e-43	0.243179	0.610731	0.203494	0.0352725	-2.2128	0.00262842	3.90073	5.07848	1.7521e-46	0.382705	1.27274	0.0481279	0.0116545	-3.70321	1.73746e-05	0.12927	-0.271114	1
ENSMUSG00000018217	Pmp22	0.00697081	-4.9864	5.2006e-45	0.00502756	-5.39874	4.49426e-42	0.390824	1.07604	0.0028381	0.08267	-1.25577	0.145575	4.394	4.95697	1.17698e-44	0.295888	0.619122	0.738546	0.0181292	-3.37447	3.83718e-05	0.334581	0.800484	1
ENSMUSG00000071604	Fam189a2	0.0358867	-2.78106	5.78351e-22	0.0138997	-4.12162	2.45451e-32	0.267655	0.327363	0.629344	0.0518066	-2.07341	0.00372119	4.77227	4.92033	2.35604e-43	0.524448	1.32597	0.0286108	0.0336686	-2.669	0.00104251	0.152082	-0.451776	1
ENSMUSG00000067786	Nnat	0.00619627	-3.67993	3.20806e-23	0.00177443	-5.30274	1.99983e-28	0.136591	1.01733	0.0157231	0.0418862	-0.751002	0.717313	1.49493	4.82478	6.41445e-34	0.212614	1.65341	0.00557889	0.00776968	-3.01457	0.00271354	0.0912494	0.46461	1
ENSMUSG00000054986	Sec14l3	0.00851987	-5.41807	7.67647e-54	0.00414034	-6.374	6.77091e-54	0.851127	1.54055	1.71543e-06	0.0132272	-4.5326	1.97323e-09	6.61218	4.79049	9.68964e-41	0.492555	0.641996	0.685727	0.0194242	-3.99255	7.16732e-07	0.501872	0.663858	1
FeatureID	FeatureName	2 Average	2 Log2 Fold Change	2 P-Value	1 Average	1 Log2 Fold Change	1 P-Value	4 Average	4 Log2 Fold Change	4 P-Value	5 Average	5 Log2 Fold Change	5 P-Value	7 Average	7 Log2 Fold Change	7 P-Value	6 Average	6 Log2 Fold Change	6 P-Value	3 Average	3 Log2 Fold Change	3 P-Value	8 Average	8 Log2 Fold Change	8 P-Value
ENSMUSG00000019942	Cdk1	0.0289159	-2.9933	2.85533e-25	0.0502756	-2.1511	1.14095e-13	0.0805334	-1.35558	0.0122875	0.0385794	-2.38906	0.0005134	0	-6.08139	0.00105666	0.0230332	-3.05424	0.00366316	1.7158	3.46887	2.02738e-29	4.37997	4.59454	1.71187e-14
ENSMUSG00000001403	Ube2c	0.0180725	-4.86932	5.13831e-48	0.0987767	-2.37022	1.58666e-15	0.156329	-1.59237	0.00341183	0.061727	-2.91172	3.63249e-05	0.0211832	-4.26327	0.0183137	0.0106307	-5.23986	2.77265e-06	4.48181	3.74707	8.12533e-36	8.51661	4.34437	9.94329e-11
ENSMUSG00000069272	Hist1h2ae	0.0196215	-1.70792	1.07081e-08	0.0147869	-2.10046	1.44423e-10	0.0426353	-0.441275	0.764979	0.0418862	-0.451195	0.980357	0.0151308	-1.69655	0.742781	0.0194896	-1.47456	0.507307	0.392369	3.04046	7.11193e-20	1.07218	4.34008	7.15006e-11
ENSMUSG00000094777	Hist1h2ap	0.0131671	-3.56934	1.87384e-28	0.0177443	-3.10735	7.33382e-21	0.0402667	-1.79511	0.0013275	0.049602	-1.47252	0.0759117	0.0151308	-2.9402	0.190297	0.0106307	-3.50122	0.00221348	1.36228	3.7748	1.43898e-33	2.53217	4.33307	5.02551e-11
ENSMUSG00000022033	Pbk	0.00722898	-3.93174	3.09898e-32	0.0138997	-2.96578	4.00704e-20	0.0378981	-1.38919	0.0113588	0.0132272	-2.82231	9.64809e-05	0.00302617	-4.04169	0.0311129	0.00177178	-4.82551	5.89552e-05	1.01394	3.85982	4.54637e-43	1.80218	4.32853	8.49797e-12
ENSMUSG00000038943	Prc1	0.0147161	-3.70675	7.01503e-31	0.00857642	-4.43928	3.8358e-33	0.0536889	-1.67826	0.00241702	0.0363748	-2.20916	0.00255613	0.018157	-3.01095	0.164456	0.0194896	-3.01549	0.00732369	1.60314	3.69243	5.17626e-33	3.09488	4.32832	5.02551e-11
ENSMUSG00000006398	Cdc20	0.0123925	-4.38091	1.08656e-39	0.0207017	-3.61238	2.09502e-27	0.122379	-0.908963	0.168531	0.0429884	-2.39976	0.000743158	0.00605234	-4.65859	0.011971	0.0194896	-3.44017	0.00157942	2.37364	3.89562	7.64276e-39	3.82487	4.19772	2.06659e-10
ENSMUSG00000074476	Spc24	0.0273669	-2.86318	3.62245e-24	0.0558946	-1.77933	1.97193e-10	0.176068	0.015844	1	0.0374771	-2.22261	0.00103972	0.0756542	-1.16701	0.981451	0.0868173	-0.999658	0.829826	1.38689	3.33496	3.19562e-27	2.90477	4.16755	7.15006e-11
ENSMUSG00000030867	Plk1	0.00722898	-3.50822	1.34279e-25	0.00887216	-3.18248	5.95783e-20	0.0165804	-2.13794	0.00016651	0.0066136	-3.29959	3.18456e-05	0.0090785	-2.62189	0.273384	0.00708713	-3.08302	0.00916998	0.784738	3.931	7.69605e-43	1.19385	4.13854	5.91602e-10
ENSMUSG00000020914	Top2a	0.0395012	-3.53686	2.65179e-32	0.0405162	-3.46944	1.68123e-27	0.0813229	-2.3361	1.00555e-05	0.0352725	-3.50026	9.48563e-07	0.0151308	-4.47615	0.0115693	0.0106307	-5.03744	4.53271e-06	4.10757	3.85663	6.78671e-40	6.20496	4.06602	1.49571e-09
