# Supplementary material for: An NKX2-1/ERK/WNT feedback loop modulates gastric identity and response to targeted therapy in lung adenocarcinoma
Source: eLife. 2021 Apr 6;10:e66788. doi: 10.7554/eLife.66788 (PMC8102067; doi:10.7554/eLife.66788)
Supplement: Supplementary file 4. [file elife-66788-supp4.xlsx]

## Sheet: Summary
Supplementary File 4 - List of DEGs from single cell sequencing
The clustering used in this DEG test is as follow:
BPN Control -> cluster 1 and cluster 3C
BPN Treated -> cluster 2 and cluster 3T
BP Control -> clusters 4 5 8
BP Treated -> clusters 6 7
For the DEG test the "FindMarkers" function from seurat package with default setting has been used, which uses wilcox test.

## Sheet: BP control vs. BP treated
	p_val	avg_logFC	pct.1	pct.2	p_val_adj
S100a6	5.7213e-217	1.83533	0.994	0.914	9.75997e-213
Hspa8	9.27494e-215	0.867847	0.999	1	1.58221e-210
S100a14	3.38553e-192	1.52611	0.953	0.565	5.77538e-188
Gapdh	6.82916e-190	0.85093	1	1	1.16499e-185
Gas6	2.4134e-173	-1.22718	0.387	0.931	4.11702e-169
Areg	4.77222e-172	1.75486	0.964	0.751	8.14093e-168
Pdzk1ip1	3.50593e-171	-1.00496	0.244	0.853	5.98077e-167
Prdx6	2.39991e-170	-1.38432	0.951	1	4.09401e-166
Cstb	1.95002e-168	0.943162	0.974	0.823	3.32654e-164
Ccnd1	7.27393e-168	1.12939	0.968	0.789	1.24086e-163
Dnaja1	8.52426e-165	0.871327	0.996	0.976	1.45415e-160
Ldha	1.39499e-160	0.952298	0.996	0.965	2.37971e-156
Dusp6	7.52044e-157	1.12477	0.855	0.331	1.28291e-152
Tff2	3.0541e-154	-1.97528	0.218	0.792	5.20998e-150
Pigr	7.79362e-150	-1.65133	0.291	0.842	1.32951e-145
Rps2	2.01317e-149	0.67002	1	1	3.43427e-145
Chchd10	1.56064e-147	-0.856564	0.886	0.996	2.6623e-143
Krt7	1.34234e-146	1.06251	0.998	0.968	2.2899e-142
Gm42418	2.88902e-146	-0.972233	1	1	4.92838e-142
Prdx1	1.43031e-145	0.643525	1	1	2.43997e-141
Clic1	5.59084e-144	0.703168	0.999	0.996	9.53742e-140
Scd2	4.11164e-141	-1.05915	0.594	0.946	7.01404e-137
Alcam	1.59009e-137	-0.689606	0.964	1	2.71254e-133
Nme1	1.74369e-137	0.722873	0.977	0.875	2.97456e-133
Ereg	2.72331e-137	1.46341	0.722	0.143	4.6457e-133
Rpl39	1.83263e-136	0.573469	0.999	1	3.12629e-132
Klf9	1.92292e-136	-0.846255	0.647	0.961	3.2803e-132
Cfi	5.50752e-136	-0.848925	0.101	0.614	9.39527e-132
St8sia6	2.122e-135	0.953537	0.773	0.267	3.61993e-131
Mettl7a1	7.6109e-134	-1.05359	0.385	0.824	1.29834e-129
Prss22	1.26251e-133	0.988758	0.577	0.008	2.15371e-129
Fam189a2	2.68573e-132	-1.21284	0.21	0.693	4.58159e-128
Eef1a1	5.27929e-132	0.599839	1	1	9.00594e-128
Cyp4b1	6.55791e-132	-0.94426	0.042	0.49	1.11871e-127
Ttr	2.04633e-129	-1.13444	0.11	0.611	3.49084e-125
Ppia	3.51288e-129	0.540142	1	1	5.99263e-125
Pfn1	8.73765e-128	0.58354	0.998	0.993	1.49056e-123
Cbr2	4.72229e-127	-2.22733	0.055	0.493	8.05575e-123
Ptprn	6.14543e-127	1.26741	0.613	0.061	1.04835e-122
Selenop	1.99958e-125	-0.76045	0.499	0.938	3.41108e-121
Hspa1b	4.0241e-125	1.07023	0.822	0.429	6.86472e-121
2200002D01Rik	4.52284e-125	0.742578	0.962	0.713	7.71552e-121
Lamc2	3.83861e-124	0.776246	0.909	0.618	6.54828e-120
Ecm1	3.05498e-123	1.32192	0.601	0.053	5.21149e-119
Gjb4	3.66891e-122	0.937899	0.574	0.036	6.25879e-118
Glul	6.18746e-120	-0.729335	0.394	0.881	1.05552e-115
Lars2	1.5603e-119	-0.84169	0.679	0.979	2.66171e-115
Hspa1a	2.14466e-119	1.30432	0.891	0.668	3.65857e-115
Pkib	3.66809e-117	0.839693	0.565	0.04	6.2574e-113
Chpt1	8.68282e-117	-0.688042	0.36	0.832	1.4812e-112
Rpl38	2.79226e-116	0.464568	0.999	1	4.76332e-112
Sult1c2	2.45915e-115	-0.715127	0.15	0.637	4.19507e-111
Hsp90ab1	5.39205e-115	0.443526	1	1	9.1983e-111
Smim6	3.76569e-114	-0.63037	0.172	0.665	6.42388e-110
Celf4	1.92684e-113	0.735722	0.604	0.086	3.28699e-109
Jund	1.42975e-110	-0.633913	0.996	1	2.439e-106
Rtkn2	9.13287e-110	-1.06009	0.023	0.392	1.55798e-105
Zbtb20	2.47746e-109	-0.724395	0.612	0.928	4.2263e-105
Aplp2	7.94137e-109	-0.657066	0.836	0.989	1.35472e-104
Lgals3	1.4793e-108	0.916822	0.981	0.86	2.52354e-104
Rpl32	1.56197e-105	0.520859	1	1	2.66456e-101
Eno1	1.90639e-105	0.708339	0.901	0.663	3.25211e-101
Dag1	4.29263e-105	-0.782016	0.588	0.902	7.3228e-101
2210407C18Rik	8.26582e-105	-0.81823	0.221	0.711	1.41007e-100
Tnfrsf12a	1.08602e-104	0.749086	0.934	0.706	1.85263e-100
Phlda1	2.62087e-104	0.762241	0.992	0.97	4.47095e-100
Ybx1	1.1729e-103	0.578993	1	1	2.00085e-99
Hspe1	2.11559e-103	0.589735	0.981	0.953	3.60899e-99
Tpm2	1.35473e-101	1.00062	0.591	0.093	2.31104e-97
Tfcp2l1	4.5455e-101	-0.709632	0.291	0.729	7.75416e-97
Anxa1	4.54668e-100	0.855014	0.988	0.909	7.75618e-96
Hc	3.1369e-99	-1.47471	0.079	0.461	5.35123e-95
Sort1	4.54751e-99	-0.590889	0.174	0.594	7.7576e-95
Atpif1	5.12294e-99	0.547456	0.994	0.996	8.73922e-95
Rpl23	6.83231e-99	0.501403	1	1	1.16552e-94
Limch1	9.11131e-99	-1.05903	0.211	0.612	1.5543e-94
Krt18	2.7057e-98	0.685837	1	0.993	4.61565e-94
Anxa2	4.33945e-98	0.819266	1	0.978	7.40267e-94
Ndst1	6.13197e-98	-0.997684	0.361	0.724	1.04605e-93
Ppp1r14b	6.95542e-98	0.700466	0.978	0.885	1.18653e-93
Btg2	7.70231e-98	-0.767204	0.89	0.993	1.31394e-93
Glrx	9.34905e-98	0.888656	0.786	0.452	1.59485e-93
Rpl37	2.09806e-96	0.443501	1	1	3.57908e-92
Srsf5	3.69117e-96	-0.539419	0.865	0.986	6.29677e-92
Ddx5	2.46538e-95	-0.438491	0.997	1	4.20568e-91
Lrpap1	2.93854e-95	-0.699364	0.49	0.848	5.01286e-91
Csrp2	6.52147e-95	-0.560823	0.157	0.594	1.1125e-90
Ier2	1.17456e-94	-0.787618	0.936	0.978	2.00369e-90
Rpl18	2.1023e-94	0.364174	1	1	3.58631e-90
Abhd2	6.05109e-94	0.721022	0.814	0.49	1.03225e-89
Il4ra	3.23419e-93	0.707517	0.742	0.321	5.5172e-89
Cox6a2	5.8348e-92	-1.03171	0.018	0.334	9.95359e-88
Akap13	1.19118e-89	-0.691727	0.744	0.956	2.03203e-85
Arpc1b	3.77226e-89	0.508079	0.998	0.985	6.4351e-85
Cox7c	4.12293e-88	0.44107	0.992	0.975	7.03331e-84
Arl6ip1	4.44471e-88	-0.599641	0.863	0.982	7.58224e-84
Ly6c1	8.12478e-88	1.05063	0.749	0.35	1.38601e-83
Emp3	4.016e-87	0.807387	0.513	0.078	6.8509e-83
Ndufa4	4.38583e-87	0.487686	0.995	0.983	7.48179e-83
Pkm	1.14899e-86	0.638841	0.988	0.963	1.96007e-82
Abca1	4.97489e-86	-0.577924	0.054	0.398	8.48667e-82
Aldoa	5.69276e-85	0.501273	0.995	0.993	9.71128e-81
Myh14	8.77186e-85	-0.703567	0.776	0.974	1.49639e-80
Stom	1.2876e-84	0.493797	0.493	0.062	2.19652e-80
Mboat1	1.32107e-84	0.537157	0.672	0.242	2.25361e-80
Scnn1a	2.0583e-84	-0.720441	0.387	0.726	3.51126e-80
Gkn3	2.36844e-84	-0.922345	0.119	0.512	4.04033e-80
Smpdl3a	6.6078e-84	-0.593247	0.319	0.719	1.12723e-79
Agr2	2.98404e-83	-0.36854	0.147	0.56	5.09048e-79
Rps26	4.06681e-83	0.449328	1	1	6.93758e-79
App	4.73163e-83	-0.534917	0.936	0.994	8.0717e-79
Rpl15	4.76067e-83	0.401757	1	1	8.12122e-79
Kmt2e	1.52889e-82	-0.53337	0.627	0.932	2.60814e-78
Elob	1.85576e-82	0.396192	0.998	0.978	3.16574e-78
Mecom	3.79523e-82	-0.559839	0.591	0.893	6.47428e-78
Eif4a1	4.86821e-82	0.452841	0.995	0.993	8.30468e-78
Ran	4.87558e-82	0.615446	0.981	0.934	8.31724e-78
Procr	5.32049e-82	1.19808	0.442	0.032	9.07623e-78
Fam107b	5.54909e-82	0.838204	0.777	0.447	9.4662e-78
S100a16	1.52527e-81	0.733247	0.931	0.827	2.60195e-77
Bmp4	2.30559e-81	0.739155	0.857	0.622	3.9331e-77
Krt8	5.8878e-81	0.607018	1	0.999	1.0044e-76
Ppa1	1.52213e-80	0.606808	0.775	0.416	2.5966e-76
Srrm2	5.09028e-80	-0.461447	0.951	0.994	8.68351e-76
Col4a4	5.708e-80	-0.978451	0.222	0.576	9.73729e-76
Spink4	6.30986e-80	-0.654731	0.068	0.409	1.0764e-75
Tpm1	8.47799e-80	0.499321	0.997	0.989	1.44626e-75
AY036118	1.08087e-79	-0.832636	0.67	0.911	1.84386e-75
Rpl36a	8.26648e-79	0.445249	0.998	0.997	1.41018e-74
Ramp1	1.22528e-78	-0.652978	0.187	0.555	2.0902e-74
Jun	1.64976e-78	-0.73718	0.891	0.994	2.81432e-74
Clu	2.02487e-78	0.78975	1	0.999	3.45423e-74
Muc1	2.39492e-78	-0.606177	0.902	0.994	4.08549e-74
Lmo4	2.55355e-78	-0.506612	0.571	0.902	4.3561e-74
Rps18	3.63966e-78	0.490612	1	1	6.2089e-74
Gde1	8.61258e-78	-0.568819	0.775	0.988	1.46922e-73
Plin2	9.44947e-78	0.759822	0.883	0.669	1.61198e-73
Rpl27	1.33526e-77	0.377734	1	1	2.27783e-73
Pfdn1	4.05863e-77	0.461111	0.967	0.87	6.92361e-73
Atf3	8.03919e-77	-0.886924	0.79	0.971	1.37141e-72
Akr1b8	8.69362e-77	0.767812	0.825	0.6	1.48304e-72
F3	2.36574e-76	1.05105	0.742	0.425	4.03571e-72
Tnfrsf23	3.11835e-76	0.947173	0.426	0.037	5.3196e-72
Eif5a	5.63986e-76	0.455656	0.998	0.992	9.62104e-72
St3gal4	6.59253e-76	0.698519	0.709	0.338	1.12462e-71
Zfpm1	7.32955e-76	-0.488114	0.194	0.582	1.25035e-71
Dhrs3	8.44236e-76	-0.603645	0.557	0.855	1.44018e-71
Camk2n1	9.51166e-76	-0.460486	0.534	0.92	1.62259e-71
Rps28	1.13505e-75	0.405522	0.999	0.999	1.93628e-71
Rpl22l1	5.63529e-75	0.508423	0.972	0.92	9.61324e-71
Fos	1.11316e-74	-0.813877	0.899	0.989	1.89893e-70
Rpl12	1.61757e-74	0.557043	1	1	2.75942e-70
Samd5	2.01461e-74	0.563872	0.477	0.076	3.43673e-70
Etv4	1.18092e-73	0.393507	0.379	0.012	2.01454e-69
Rpl35	1.4396e-73	0.46344	1	0.997	2.45581e-69
Fkbp1a	1.5546e-73	0.485598	0.98	0.925	2.652e-69
Egr1	2.2985e-73	-0.73165	0.819	0.968	3.92102e-69
Emp1	7.45588e-73	0.967245	0.798	0.576	1.2719e-68
Rplp0	8.25454e-73	0.46089	1	1	1.40814e-68
Gstm1	1.01434e-72	-0.565766	0.471	0.841	1.73036e-68
Clic3	1.17086e-72	-0.907243	0.591	0.867	1.99738e-68
Vamp8	1.34698e-72	-0.457015	0.985	1	2.29781e-68
Hspd1	1.85827e-72	0.539959	0.953	0.875	3.17002e-68
Tnfsf9	3.58724e-72	0.498211	0.451	0.064	6.11947e-68
Pcsk6	5.18527e-72	0.449801	0.429	0.048	8.84555e-68
Tppp3	6.72225e-72	-0.685547	0.07	0.384	1.14675e-67
Tpt1	6.90062e-72	0.450592	1	1	1.17718e-67
Bcr	1.03076e-71	0.921671	0.726	0.392	1.75837e-67
Tff3	1.45684e-71	-0.542888	0.125	0.488	2.48523e-67
Magi3	1.54602e-71	-0.699228	0.489	0.784	2.63736e-67
Emb	2.55882e-71	-0.684159	0.455	0.734	4.3651e-67
Cmpk1	6.83741e-71	0.465625	0.879	0.679	1.16639e-66
Ptges	1.10921e-70	0.58624	0.701	0.296	1.8922e-66
Mif	1.84944e-70	0.588369	0.949	0.856	3.15495e-66
Itga2	1.88424e-70	1.04675	0.542	0.18	3.21432e-66
Ptprf	2.057e-70	-0.504249	0.878	0.997	3.50904e-66
Ces1d	2.10601e-70	-0.811551	0.322	0.662	3.59264e-66
Stk39	2.29039e-70	0.570919	0.617	0.226	3.90718e-66
Mpp6	2.76327e-70	0.489275	0.698	0.303	4.71386e-66
Sftpb	3.94016e-70	1.31263	0.85	0.88	6.72152e-66
Galnt18	4.73646e-70	-0.427603	0.021	0.278	8.07992e-66
Ldhb	5.2098e-70	-0.642978	0.146	0.481	8.8874e-66
Dynll1	7.13126e-70	0.384974	1	0.994	1.21652e-65
Hs3st1	7.9116e-70	0.758838	0.672	0.348	1.34964e-65
Mmp15	2.79463e-69	-0.469161	0.423	0.807	4.76736e-65
Ptgs2os2	5.34066e-69	0.493985	0.392	0.032	9.11063e-65
Rpsa	8.31482e-69	0.461958	1	1	1.41842e-64
Il18	1.92087e-68	-0.36919	0.18	0.565	3.27681e-64
Rpl7a	1.95745e-68	0.354838	1	1	3.33921e-64
Pgam1	2.50928e-68	0.496102	0.912	0.731	4.28058e-64
Nkd1	2.21507e-67	-0.622197	0.136	0.464	3.77869e-63
Hs2st1	2.4033e-67	-0.850366	0.425	0.705	4.09979e-63
Sdc1	5.20145e-67	0.515367	0.98	0.985	8.87315e-63
Scd1	5.57088e-67	-1.78399	0.702	0.874	9.50336e-63
Adgrf5	7.43739e-67	-0.575242	0.506	0.76	1.26874e-62
Ager	1.00298e-66	-1.1842	0.724	0.979	1.71098e-62
Sec14l3	2.07619e-66	-1.0405	0.352	0.65	3.54178e-62
Pmp22	2.38134e-66	-0.977826	0.285	0.587	4.06232e-62
Rpl34	2.9585e-66	0.35047	0.999	1	5.0469e-62
Plpp2	4.52553e-66	0.460562	0.921	0.794	7.7201e-62
Nab2	1.09806e-65	0.50242	0.507	0.136	1.87318e-61
Ccnl1	1.81466e-65	-0.493453	0.699	0.913	3.09563e-61
Cyb5a	2.29525e-65	-0.441563	0.911	0.994	3.91547e-61
Nhp2	2.49583e-65	0.522074	0.867	0.723	4.25763e-61
Ppp1r1b	3.60016e-65	-0.317929	0.014	0.248	6.14151e-61
Krt79	3.71311e-65	0.911467	0.347	0.014	6.33419e-61
B2m	6.64315e-65	-0.510117	0.666	0.928	1.13326e-60
Rgs4	7.33515e-65	0.736429	0.338	0.01	1.2513e-60
Nfix	1.91411e-64	-0.500064	0.554	0.828	3.26528e-60
Ccnd2	5.88252e-64	-0.495329	0.288	0.699	1.0035e-59
Nedd4l	6.66817e-64	-0.513476	0.401	0.719	1.13752e-59
Cat	7.99851e-64	-0.767518	0.498	0.73	1.36447e-59
Cryab	3.21114e-63	-0.99135	0.544	0.773	5.47788e-59
Creg1	4.35831e-63	-0.491971	0.641	0.892	7.43485e-59
Fosb	7.5242e-63	-0.804011	0.665	0.938	1.28355e-58
Zfp36	9.51102e-63	-0.483196	0.615	0.921	1.62249e-58
Pcolce	1.566e-62	0.585276	0.591	0.209	2.67144e-58
Irx1	1.82699e-62	-0.717238	0.422	0.708	3.11667e-58
Mrpl32	1.84365e-62	0.576867	0.824	0.612	3.14508e-58
Zfp36l1	1.93732e-62	-0.471353	0.732	0.968	3.30488e-58
Mal	2.10913e-62	0.714178	0.951	0.947	3.59797e-58
Gstt1	2.14294e-62	-0.564832	0.409	0.716	3.65564e-58
5330417C22Rik	3.74625e-62	-0.496217	0.049	0.316	6.39072e-58
Esd	5.84272e-62	0.744531	0.932	0.849	9.96709e-58
Gjb3	6.46085e-62	0.428809	0.476	0.115	1.10216e-57
Adssl1	6.85541e-62	0.605755	0.638	0.291	1.16946e-57
2020-09-11	1.43809e-61	0.445282	0.54	0.162	2.45324e-57
Rpl6	1.50337e-61	0.332206	1	1	2.5646e-57
C6	2.20294e-61	-0.3449	0.008	0.222	3.75799e-57
Cystm1	2.35121e-61	0.357493	0.998	0.992	4.01093e-57
Psma2	4.10773e-61	0.392232	0.975	0.95	7.00738e-57
Ctsh	5.09836e-61	0.788836	0.994	1	8.69729e-57
Csrp1	1.53256e-60	-0.530561	0.742	0.954	2.6144e-56
Gsn	2.98817e-60	0.689873	0.891	0.742	5.09752e-56
Cldn4	6.66941e-60	0.980208	0.597	0.259	1.13773e-55
Sptssb	8.51419e-60	-0.317849	0.158	0.506	1.45243e-55
Tgm2	1.70688e-59	-0.502604	0.263	0.582	2.91176e-55
Rpl10a	3.85688e-59	0.377265	1	1	6.57945e-55
Ccdc83	4.08732e-59	0.397181	0.375	0.046	6.97256e-55
Sem1	5.77115e-59	0.358206	0.975	0.895	9.84501e-55
Eva1a	1.01821e-58	0.450927	0.47	0.116	1.73696e-54
Rpl28	1.12158e-58	0.360231	1	1	1.9133e-54
Rpl36	1.65354e-58	0.337481	1	1	2.82077e-54
Tra2a	2.52841e-58	-0.495034	0.79	0.936	4.31321e-54
Slc39a8	3.4154e-58	-0.587498	0.247	0.555	5.82633e-54
Snx7	3.58046e-58	0.585498	0.647	0.298	6.10791e-54
Cycs	4.40818e-58	0.459813	0.94	0.877	7.51991e-54
Eef1e1	5.47121e-58	0.381661	0.502	0.139	9.33333e-54
Rnase4	8.36691e-58	-0.525488	0.646	0.961	1.42731e-53
Phc2	8.76538e-58	0.463052	0.74	0.416	1.49529e-53
Tmod1	1.19961e-57	-0.417801	0.052	0.305	2.04642e-53
Cldn18	1.31789e-57	-0.702511	0.989	0.994	2.24819e-53
Vmp1	1.35661e-57	0.405815	0.983	0.956	2.31425e-53
Akap9	1.44819e-57	-0.427084	0.74	0.938	2.47048e-53
Cda	1.73072e-57	0.427804	0.381	0.053	2.95243e-53
Anxa3	2.48972e-57	0.414116	1	0.993	4.24721e-53
Epha2	4.44665e-57	0.502617	0.742	0.422	7.58555e-53
Col4a3	4.56451e-57	-0.747835	0.12	0.4	7.78659e-53
Rpl35a	4.99784e-57	0.3258	1	1	8.52582e-53
Inf2	5.1623e-57	0.402561	0.595	0.217	8.80637e-53
Arpc2	6.42006e-57	0.321435	0.998	0.986	1.0952e-52
Tpm4	6.82879e-57	0.423021	0.968	0.899	1.16492e-52
Hint1	6.83718e-57	0.332431	0.998	0.997	1.16635e-52
Ddx39	7.0014e-57	0.504133	0.56	0.212	1.19437e-52
Rpl41	8.87852e-57	0.307576	1	1	1.51459e-52
Fam3c	1.21543e-56	0.481662	0.683	0.334	2.0734e-52
Krt19	1.78704e-56	0.570765	0.996	0.95	3.04852e-52
Akap5	1.95073e-56	-1.25745	0.291	0.561	3.32775e-52
Bri3	3.66798e-56	-0.353862	0.986	0.997	6.2572e-52
Clic5	8.08648e-56	-1.03957	0.572	0.787	1.37947e-51
Slco3a1	1.42297e-55	-0.600467	0.215	0.517	2.42744e-51
Rpl22	1.48423e-55	0.352856	0.998	1	2.53196e-51
Scn1b	1.52397e-55	0.38675	0.419	0.086	2.59974e-51
Sdf2l1	1.72617e-55	0.49904	0.481	0.139	2.94467e-51
Sfn	2.77388e-55	0.893365	0.8	0.633	4.73195e-51
Nceh1	3.14253e-55	-0.612491	0.343	0.629	5.36085e-51
Rpl24	3.21602e-55	0.312479	1	1	5.48621e-51
Abcd3	4.21402e-55	-0.482737	0.639	0.861	7.1887e-51
Atxn7l3b	6.82262e-55	-0.416393	0.826	0.953	1.16387e-50
mt-Nd5	9.43002e-55	-0.430186	0.959	0.99	1.60867e-50
Psat1	9.48461e-55	0.386916	0.375	0.058	1.61798e-50
Ociad2	9.75541e-55	-0.446956	0.5	0.824	1.66418e-50
Ttc9	1.04982e-54	0.441468	0.513	0.166	1.79089e-50
Cxadr	1.23356e-54	-0.442263	0.606	0.873	2.10433e-50
Gdf15	2.07888e-54	1.07602	0.406	0.083	3.54636e-50
Car2	2.30854e-54	-0.414473	0.443	0.784	3.93814e-50
Rbp4	4.96865e-54	0.721995	0.509	0.175	8.47602e-50
Cyp2s1	5.63359e-54	-0.381239	0.133	0.442	9.61033e-50
Npm1	5.77913e-54	0.529559	0.998	0.996	9.85861e-50
Gprin3	7.92051e-54	-0.496823	0.27	0.557	1.35116e-49
Ly6a	9.33984e-54	1.90981	0.578	0.325	1.59328e-49
Itm2b	9.8749e-54	-0.354903	0.99	1	1.68456e-49
Mrto4	1.12879e-53	0.438882	0.585	0.241	1.92561e-49
Timp3	1.44121e-53	-0.919393	0.436	0.683	2.45855e-49
Socs3	1.9675e-53	-0.587405	0.45	0.765	3.35636e-49
Fth1	2.35761e-53	-0.262762	1	1	4.02184e-49
Sult1a1	3.11233e-53	-0.3717	0.072	0.327	5.30932e-49
Gng5	3.37852e-53	0.284705	1	0.999	5.76342e-49
Bag1	4.4161e-53	-0.371235	0.969	0.994	7.53343e-49
Nckap5	6.12181e-53	-0.519153	0.429	0.708	1.04432e-48
Arpc5l	9.6954e-53	0.392236	0.892	0.773	1.65394e-48
Rps27l	1.09729e-52	0.410141	0.985	0.979	1.87186e-48
H3f3b	1.52489e-52	-0.382165	0.998	1	2.60131e-48
Nfkbia	1.72311e-52	-0.556164	0.586	0.875	2.93946e-48
Slc39a10	1.97371e-52	0.436974	0.485	0.148	3.36695e-48
Lmna	2.17329e-52	0.447559	0.968	0.893	3.70741e-48
Lurap1l	3.96906e-52	-0.452554	0.57	0.863	6.77082e-48
Smurf1	4.42737e-52	0.378864	0.51	0.17	7.55264e-48
Slc2a1	1.06614e-51	0.396725	0.419	0.096	1.81873e-47
Onecut2	1.19484e-51	-0.450083	0.305	0.68	2.03828e-47
Fam162a	1.57287e-51	0.489526	0.875	0.773	2.68316e-47
Nipal1	1.62669e-51	0.476116	0.468	0.14	2.77497e-47
Gramd2	1.65149e-51	-0.635739	0.251	0.525	2.81728e-47
Actn1	1.90283e-51	0.509959	0.843	0.706	3.24604e-47
Mrpl52	1.94788e-51	0.332336	0.941	0.871	3.32288e-47
Hsp90aa1	2.23518e-51	0.394664	0.999	0.999	3.81299e-47
Snrpd1	2.82326e-51	0.415263	0.863	0.708	4.81619e-47
Lyz2	5.15813e-51	-1.63552	0.483	0.806	8.79926e-47
Magi1	5.1833e-51	-0.455996	0.235	0.524	8.8422e-47
Sec61g	5.93243e-51	0.425579	0.963	0.938	1.01201e-46
Fbln5	1.05123e-50	-0.443579	0.05	0.28	1.79329e-46
Wls	2.13407e-50	-0.405733	0.73	0.916	3.64051e-46
Tspan15	2.87492e-50	-0.497422	0.465	0.74	4.90432e-46
Klf6	3.47127e-50	-0.55432	0.916	0.979	5.92164e-46
Scp2	3.57827e-50	-0.553345	0.885	0.99	6.10417e-46
Lgals4	4.20007e-50	-0.357256	0.406	0.778	7.1649e-46
Eef1b2	6.61786e-50	0.370258	1	1	1.12894e-45
Traf1	8.24745e-50	-0.500573	0.215	0.494	1.40693e-45
Phlda2	9.52479e-50	0.376602	0.416	0.1	1.62483e-45
Atp1b1	1.05092e-49	-0.43191	0.904	1	1.79276e-45
Nav2	1.09469e-49	-0.519957	0.324	0.598	1.86744e-45
Ern2	1.30502e-49	-0.327117	0.062	0.305	2.22624e-45
Nfib	1.70896e-49	-0.381225	0.656	0.898	2.91532e-45
Rpl13	2.82505e-49	0.347969	1	1	4.81926e-45
Phactr1	3.15119e-49	-0.319981	0.01	0.188	5.37562e-45
Cct2	3.55009e-49	0.394141	0.954	0.898	6.0561e-45
Ffar4	4.78801e-49	0.474581	0.426	0.118	8.16786e-45
Bicc1	5.41637e-49	-0.454208	0.214	0.512	9.23978e-45
Rhob	8.79397e-49	-0.456225	0.465	0.776	1.50016e-44
Fus	8.93885e-49	-0.402799	0.746	0.917	1.52488e-44
Nt5e	9.60046e-49	0.510382	0.52	0.183	1.63774e-44
Rps20	9.61721e-49	0.400667	1	1	1.6406e-44
Vsig1	1.06919e-48	-0.250334	0.143	0.446	1.82393e-44
Mxd4	1.51276e-48	-0.430776	0.634	0.852	2.58061e-44
Nfe2l2	1.51651e-48	0.548845	0.95	0.945	2.58701e-44
Qk	2.72107e-48	-0.646038	0.753	0.856	4.64188e-44
Itih4	2.80595e-48	-0.724457	0.027	0.227	4.78667e-44
Rasl11a	3.30326e-48	-0.584708	0.225	0.522	5.63503e-44
Rps24	4.01426e-48	0.370389	1	1	6.84793e-44
Nfkbiz	4.04625e-48	-0.419231	0.353	0.708	6.90249e-44
Uchl3	4.20824e-48	0.445592	0.671	0.377	7.17884e-44
Ahnak	8.29419e-48	-0.598234	0.886	0.953	1.41491e-43
Rpl11	8.29451e-48	0.268631	1	1	1.41496e-43
Adss	9.29483e-48	0.438519	0.863	0.717	1.5856e-43
Arid5b	1.13386e-47	-0.405949	0.672	0.899	1.93425e-43
Afp	1.19154e-47	0.42548	0.399	0.098	2.03265e-43
Sh3bgrl3	1.36718e-47	0.394828	0.941	0.882	2.33228e-43
Rai14	1.90953e-47	0.443098	0.901	0.709	3.25747e-43
Las1l	2.30536e-47	0.421249	0.665	0.342	3.93272e-43
Rps8	2.51898e-47	0.280388	1	1	4.29712e-43
Kcnj15	2.73274e-47	-0.633513	0.334	0.591	4.66178e-43
Rabac1	2.80861e-47	-0.396566	0.965	0.994	4.79121e-43
Rpl27a	4.68442e-47	0.316065	1	1	7.99115e-43
Rps15a	7.76175e-47	0.363895	1	1	1.32408e-42
Id2	8.45675e-47	-0.358513	0.543	0.888	1.44264e-42
Cst8	8.49379e-47	-0.374698	0.012	0.187	1.44896e-42
Eif4a2	8.54553e-47	-0.359385	0.873	0.982	1.45778e-42
Aox3	1.04124e-46	-0.875641	0.152	0.413	1.77625e-42
Hilpda	1.14608e-46	0.844238	0.391	0.104	1.9551e-42
Rpl13a	1.87878e-46	0.409402	0.944	0.909	3.205e-42
Acot7	2.18849e-46	0.435996	0.714	0.349	3.73334e-42
Tspan4	2.56973e-46	0.344968	0.46	0.14	4.3837e-42
Txnip	3.37567e-46	-0.478209	0.752	0.932	5.75856e-42
Psmb5	4.02442e-46	0.299722	0.984	0.958	6.86525e-42
Tmem213	4.62774e-46	1.08539	0.556	0.325	7.89445e-42
Atp6v1c2	6.69506e-46	-0.3246	0.082	0.327	1.14211e-41
Pwp1	6.89381e-46	0.326699	0.442	0.129	1.17601e-41
Rpl3	7.33115e-46	0.322736	0.999	1	1.25062e-41
Rab27b	7.3434e-46	-0.311373	0.365	0.709	1.25271e-41
Resf1	8.20085e-46	-0.533343	0.637	0.841	1.39898e-41
Bace2	9.4043e-46	-0.340266	0.285	0.627	1.60428e-41
Flna	1.06749e-45	0.503495	0.793	0.622	1.82104e-41
Luc7l2	1.41574e-45	-0.384081	0.856	0.97	2.41512e-41
Stip1	2.09356e-45	0.37534	0.746	0.479	3.5714e-41
Galnt7	2.78634e-45	-0.3069	0.265	0.594	4.75322e-41
Myc	1.0599e-44	0.338119	0.313	0.046	1.80809e-40
Fermt1	1.12974e-44	-0.31527	0.241	0.572	1.92722e-40
Rps13	1.23806e-44	0.293551	1	1	2.11201e-40
Cebpd	1.24836e-44	-0.717729	0.522	0.752	2.12958e-40
Sprr1a	1.63434e-44	1.50128	0.411	0.137	2.78802e-40
Metrnl	1.7382e-44	0.390792	0.562	0.252	2.9652e-40
Iqgap1	3.61255e-44	-0.316189	0.984	1	6.16265e-40
Gclc	3.70459e-44	0.734057	0.911	0.922	6.31966e-40
Rps3	4.11995e-44	0.318593	1	1	7.02822e-40
Rab11fip1	4.26398e-44	-0.502887	0.577	0.806	7.27392e-40
Fxyd5	4.34754e-44	0.66792	0.301	0.043	7.41646e-40
Pgk1	4.57774e-44	0.449232	0.864	0.765	7.80917e-40
Kcne3	5.01163e-44	-0.474178	0.047	0.255	8.54933e-40
Pdgfa	5.87451e-44	-0.486552	0.334	0.59	1.00213e-39
Cks1b	5.89711e-44	0.496064	0.342	0.068	1.00599e-39
Mid1ip1	7.05802e-44	-0.629538	0.611	0.806	1.20403e-39
Junb	7.94292e-44	-0.48644	0.988	0.992	1.35498e-39
Ralgps2	9.66907e-44	0.380026	0.509	0.202	1.64945e-39
Gsta3	9.71425e-44	-0.445665	0.263	0.576	1.65715e-39
St6galnac2	1.13153e-43	-0.389769	0.138	0.388	1.93028e-39
Rasgrf1	1.13278e-43	0.29615	0.302	0.04	1.93242e-39
Cacybp	1.3961e-43	0.356588	0.87	0.735	2.38162e-39
Rnh1	1.63614e-43	0.36255	0.968	0.909	2.79108e-39
Rgs17	1.82754e-43	-0.286603	0.091	0.341	3.1176e-39
Tubb5	2.0892e-43	0.579677	0.948	0.914	3.56396e-39
Ywhag	2.1366e-43	0.394461	0.749	0.51	3.64483e-39
Ddrgk1	2.26739e-43	-0.34762	0.745	0.922	3.86794e-39
Secisbp2l	3.0145e-43	-0.521762	0.47	0.673	5.14244e-39
Pthlh	3.40887e-43	0.446598	0.229	0.001	5.81518e-39
Rpl19	4.5075e-43	0.265736	1	1	7.68935e-39
Cmas	4.56282e-43	0.398305	0.641	0.368	7.78372e-39
Hsph1	4.74347e-43	0.449209	0.645	0.388	8.09188e-39
Cavin3	5.01009e-43	0.540744	0.641	0.323	8.54671e-39
Sgms2	5.65958e-43	0.510664	0.32	0.058	9.65468e-39
Fabp5	5.69798e-43	-0.849064	0.505	0.853	9.72018e-39
Atp8a1	7.13456e-43	-0.469733	0.844	0.975	1.21708e-38
Cct5	1.20278e-42	0.327243	0.968	0.938	2.05182e-38
Fnbp1l	1.37824e-42	-0.418869	0.579	0.809	2.35114e-38
Nedd9	1.39198e-42	-0.478178	0.279	0.532	2.37458e-38
Eif2s1	1.64558e-42	0.37115	0.769	0.533	2.80719e-38
Id3	1.72933e-42	-0.751256	0.505	0.766	2.95007e-38
Pfdn4	1.91512e-42	0.325003	0.51	0.197	3.26701e-38
Meg3	3.12063e-42	1.48067	0.575	0.356	5.32348e-38
Lif	3.4341e-42	0.346811	0.241	0.01	5.85824e-38
Atp6v1g3	4.52797e-42	0.296605	0.245	0.012	7.72426e-38
Clk1	5.10108e-42	-0.360332	0.656	0.871	8.70193e-38
Casp3	1.04795e-41	0.398314	0.452	0.159	1.7877e-37
Cks2	1.173e-41	0.420922	0.338	0.072	2.00102e-37
Swt1	2.05584e-41	-0.425143	0.643	0.794	3.50705e-37
Hhex	2.32577e-41	0.345579	0.325	0.064	3.96752e-37
S100a11	3.39643e-41	0.354071	1	0.996	5.79397e-37
Khk	3.45758e-41	-0.29741	0.098	0.332	5.89828e-37
Atp6v0c	3.98571e-41	0.284065	0.999	0.997	6.79922e-37
Arhgef40	4.03371e-41	0.295854	0.335	0.069	6.88111e-37
Rabggtb	5.06222e-41	0.289007	0.445	0.147	8.63564e-37
Rps6ka4	5.69062e-41	0.298171	0.464	0.161	9.70762e-37
Rab11a	6.18905e-41	0.325109	0.916	0.839	1.05579e-36
Ambp	6.79937e-41	-0.547545	0.049	0.249	1.1599e-36
Cct8	1.22963e-40	0.370594	0.901	0.813	2.09763e-36
mt-Co2	1.4418e-40	0.282134	1	1	2.45957e-36
Sat1	2.00695e-40	0.464684	0.936	0.878	3.42366e-36
Arhgap5	2.18887e-40	-0.375584	0.692	0.873	3.73399e-36
Prom1	3.71347e-40	-0.287438	0.096	0.331	6.33481e-36
Polr2l	3.94598e-40	0.322198	0.571	0.265	6.73146e-36
Myo1b	5.13101e-40	-0.661821	0.509	0.688	8.75299e-36
Cd44	5.30795e-40	0.483573	0.71	0.435	9.05483e-36
Cfl1	5.8562e-40	0.300015	0.997	0.986	9.99009e-36
Pla2g16	7.07012e-40	-0.345454	0.378	0.647	1.20609e-35
Card19	7.64818e-40	0.368089	0.685	0.432	1.3047e-35
Pdlim7	7.77737e-40	0.383798	0.281	0.04	1.32674e-35
Cct7	7.83957e-40	0.297991	0.957	0.885	1.33735e-35
Ppp3ca	8.22254e-40	-0.474808	0.779	0.909	1.40268e-35
Kif23	1.10479e-39	0.388477	0.379	0.109	1.88466e-35
Oit1	1.50782e-39	-0.251423	0.249	0.566	2.5722e-35
Ddit4	1.90868e-39	0.382507	0.478	0.179	3.25601e-35
Anxa5	1.98581e-39	0.340487	0.989	0.913	3.38759e-35
Klhl24	2.03988e-39	-0.414413	0.459	0.68	3.47982e-35
Lrrc8c	2.67063e-39	0.3901	0.685	0.403	4.55583e-35
Cmtm7	3.41733e-39	-0.301108	0.166	0.425	5.82962e-35
Tomm20	3.59859e-39	0.372631	0.967	0.929	6.13884e-35
Thra	3.62241e-39	-0.416269	0.27	0.51	6.17946e-35
Utp11	3.69508e-39	0.330162	0.689	0.417	6.30344e-35
Sorbs2	3.70161e-39	-0.312783	0.2	0.485	6.31458e-35
Avpi1	6.28368e-39	0.38442	0.951	0.956	1.07193e-34
Rnf5	9.35294e-39	0.306915	0.515	0.212	1.59552e-34
Arhgef12	1.01893e-38	-0.372319	0.588	0.801	1.73819e-34
Ahr	1.23812e-38	0.382729	0.549	0.252	2.11212e-34
Ddx3x	1.38707e-38	-0.333016	0.715	0.931	2.3662e-34
Hspa5	1.4975e-38	0.696045	0.985	0.99	2.55459e-34
Pin4	2.05461e-38	0.362215	0.719	0.499	3.50495e-34
Kmt2c	2.1457e-38	-0.381039	0.332	0.578	3.66034e-34
Ak6	2.66156e-38	0.328099	0.625	0.32	4.54035e-34
Ugt2b34	2.80274e-38	-0.283079	0.052	0.247	4.7812e-34
Timm8b	3.01289e-38	0.305841	0.912	0.839	5.1397e-34
Mt1	3.3423e-38	1.28053	0.837	0.886	5.70163e-34
Lbp	3.39922e-38	-0.361791	0.501	0.814	5.79873e-34
Atp5e	3.46233e-38	0.267129	0.994	0.992	5.9064e-34
Tm9sf3	3.91983e-38	-0.334982	0.833	0.956	6.68684e-34
mt-Nd2	3.93192e-38	-0.364715	0.999	1	6.70746e-34
Pbxip1	4.14124e-38	-0.394326	0.458	0.68	7.06454e-34
Snrpf	4.3178e-38	0.338672	0.619	0.341	7.36574e-34
Ddx6	4.39667e-38	-0.328127	0.726	0.898	7.50028e-34
Arhgef26	5.08351e-38	-0.504585	0.238	0.478	8.67196e-34
Ost4	5.3886e-38	0.32805	0.763	0.561	9.19241e-34
Plek2	5.43411e-38	0.383048	0.418	0.148	9.27004e-34
Dcxr	6.06149e-38	-0.621035	0.525	0.686	1.03403e-33
Pnisr	7.09662e-38	-0.372094	0.735	0.898	1.21061e-33
Spop	9.18703e-38	-0.388543	0.567	0.774	1.56722e-33
Rps4x	9.58481e-38	0.3088	1	1	1.63507e-33
Pik3ap1	1.21429e-37	-0.255902	0.024	0.186	2.07145e-33
Shc1	1.4948e-37	0.293382	0.476	0.186	2.54998e-33
Pgc	1.53438e-37	-0.889357	0.01	0.151	2.61749e-33
Os9	1.85231e-37	-0.341071	0.668	0.881	3.15986e-33
Ceacam1	2.07866e-37	0.572467	0.726	0.619	3.54598e-33
Naa20	2.08135e-37	0.294467	0.48	0.188	3.55058e-33
Ube2n	2.42762e-37	0.328005	0.786	0.597	4.14127e-33
Ivl	3.39187e-37	0.704897	0.218	0.01	5.78618e-33
Fry	5.04108e-37	-0.273362	0.07	0.273	8.59958e-33
Hsd17b10	7.36564e-37	0.483819	0.917	0.886	1.25651e-32
Nnat	8.51374e-37	-0.561239	0.086	0.294	1.45236e-32
Hecw1	1.60343e-36	0.28694	0.343	0.083	2.73529e-32
Tnip3	2.13812e-36	0.952519	0.326	0.084	3.64741e-32
Cytip	2.44696e-36	-0.27209	0.088	0.299	4.17426e-32
Vcpkmt	2.47984e-36	0.281236	0.4	0.134	4.23037e-32
Epgn	2.75834e-36	0.337043	0.217	0.012	4.70545e-32
Rpl4	3.12591e-36	0.302067	1	0.999	5.33248e-32
Usmg5	3.56017e-36	0.306115	0.877	0.749	6.07329e-32
Ndrg1	3.66224e-36	0.539961	0.343	0.094	6.24741e-32
St3gal1	3.9773e-36	0.358939	0.582	0.305	6.78487e-32
Bik	4.46917e-36	-0.35916	0.179	0.411	7.62395e-32
Rbms3	4.87744e-36	-0.326444	0.146	0.377	8.32043e-32
C1qbp	5.12672e-36	0.400663	0.792	0.666	8.74567e-32
Psmd14	6.74667e-36	0.327599	0.635	0.364	1.15091e-31
Pomp	6.87157e-36	0.265923	0.984	0.972	1.17222e-31
2210011C24Rik	7.11867e-36	-0.463993	0.124	0.338	1.21437e-31
Aldh1a3	8.31416e-36	0.923724	0.25	0.033	1.41831e-31
Srm	1.15582e-35	0.293235	0.369	0.112	1.97171e-31
Rps5	1.66648e-35	0.34479	1	1	2.84285e-31
Nipbl	1.84503e-35	-0.341494	0.652	0.837	3.14744e-31
St13	2.18256e-35	0.306396	0.941	0.885	3.72323e-31
Myo6	2.37447e-35	-0.292736	0.261	0.524	4.0506e-31
Cd36	2.43983e-35	0.782712	0.684	0.548	4.1621e-31
Tnfaip1	2.49948e-35	-0.350848	0.738	0.878	4.26386e-31
Acadl	2.76587e-35	0.298934	0.921	0.863	4.71831e-31
Emp2	3.28911e-35	-0.808067	0.981	0.993	5.61089e-31
Sdc4	4.38145e-35	-0.301726	0.978	1	7.47432e-31
Ptgs2	5.41375e-35	0.460908	0.378	0.119	9.23531e-31
Cct3	6.22725e-35	0.285901	0.947	0.899	1.06231e-30
Angptl4	7.1923e-35	0.616226	0.264	0.044	1.22693e-30
Sptssa	7.63861e-35	-0.320657	0.347	0.593	1.30307e-30
Rfk	1.26084e-34	0.341441	0.858	0.807	2.15087e-30
Stn1	1.28562e-34	0.275529	0.381	0.123	2.19314e-30
Pcyt1a	1.28683e-34	-0.353162	0.221	0.449	2.1952e-30
Btg3	1.32299e-34	0.379565	0.827	0.636	2.25688e-30
Calr	1.48172e-34	0.413741	0.992	0.994	2.52766e-30
Phgdh	1.83298e-34	0.758741	0.402	0.155	3.12688e-30
Pik3r1	2.59383e-34	-0.342789	0.159	0.381	4.42481e-30
Serpinb9	2.63471e-34	-0.619943	0.447	0.657	4.49455e-30
mt-Atp6	2.70439e-34	0.287333	1	1	4.61343e-30
Mtap	3.43582e-34	0.318699	0.431	0.168	5.86116e-30
Fetub	3.50054e-34	0.297222	0.287	0.058	5.97157e-30
Fn1	3.60348e-34	0.862597	0.299	0.073	6.14718e-30
Wwp1	3.98732e-34	-0.460791	0.483	0.663	6.80197e-30
S100a13	4.27888e-34	0.396156	0.928	0.864	7.29934e-30
Swap70	4.36684e-34	-0.318666	0.116	0.327	7.44939e-30
Fgf1	5.19717e-34	-0.446352	0.292	0.512	8.86586e-30
Cox7a2	5.80357e-34	0.277311	0.99	0.986	9.90031e-30
Tent5a	5.95172e-34	-0.276606	0.06	0.245	1.0153e-29
Tubb6	5.99139e-34	0.336533	0.256	0.04	1.02207e-29
Atp5g2	6.11586e-34	0.259148	0.992	0.99	1.0433e-29
Matn4	6.15567e-34	-0.431949	0.373	0.597	1.0501e-29
Tma7	6.8504e-34	0.287315	0.973	0.935	1.16861e-29
Uqcc2	1.05204e-33	0.31089	0.837	0.731	1.79467e-29
Macf1	1.21544e-33	-0.433181	0.652	0.802	2.07341e-29
Spns2	1.30933e-33	0.262435	0.294	0.066	2.23358e-29
Pnrc1	1.32746e-33	-0.34034	0.921	0.986	2.26452e-29
Slc35d1	1.33667e-33	0.310598	0.369	0.12	2.28022e-29
Ak3	1.42392e-33	-0.283645	0.433	0.693	2.42907e-29
Mbip	1.60796e-33	-0.365279	0.679	0.848	2.74302e-29
Ahsa2	1.62754e-33	0.259535	0.422	0.155	2.77642e-29
Car8	1.88044e-33	-0.404952	0.581	0.852	3.20784e-29
Mtch1	1.98505e-33	-0.320426	0.87	0.974	3.3863e-29
Csde1	2.08378e-33	-0.270271	0.87	0.956	3.55473e-29
AC149090.1	3.18311e-33	-0.344592	0.67	0.855	5.43006e-29
Adam9	4.23857e-33	0.26553	0.402	0.144	7.23058e-29
Chordc1	4.26455e-33	0.285022	0.598	0.313	7.27489e-29
Elk3	5.89784e-33	0.255469	0.412	0.145	1.00611e-28
Orai1	7.22154e-33	0.331707	0.789	0.562	1.23192e-28
Arhgap31	7.42728e-33	-0.360313	0.314	0.537	1.26702e-28
Pgrmc1	7.44141e-33	-0.363355	0.497	0.741	1.26943e-28
Rims2	7.71998e-33	0.251868	0.253	0.042	1.31695e-28
4930523C07Rik	9.04733e-33	-0.491427	0.699	0.856	1.54338e-28
Minos1	9.04817e-33	0.276097	0.962	0.943	1.54353e-28
Nrbp2	1.00274e-32	-0.304742	0.173	0.393	1.71057e-28
Nucb2	1.05001e-32	0.337413	0.645	0.36	1.79121e-28
Pllp	1.31463e-32	0.300847	0.436	0.188	2.24264e-28
Gsr	1.38235e-32	0.428966	0.736	0.608	2.35815e-28
Mbnl1	1.53738e-32	-0.347169	0.777	0.927	2.62261e-28
Golm1	1.81202e-32	0.340608	0.876	0.763	3.09113e-28
Rap2b	1.86824e-32	0.406999	0.305	0.08	3.18702e-28
H13	1.89389e-32	0.341361	0.867	0.803	3.23079e-28
Isyna1	2.16653e-32	0.312895	0.561	0.289	3.69589e-28
Mxd1	2.35245e-32	0.447549	0.473	0.222	4.01304e-28
Nop56	2.39037e-32	0.378317	0.589	0.337	4.07774e-28
Tcp1	2.70404e-32	0.282471	0.942	0.892	4.61283e-28
Sult2b1	2.87231e-32	0.293257	0.348	0.111	4.89988e-28
Uqcrq	2.94902e-32	0.272538	0.979	0.965	5.03074e-28
Sptbn1	3.05321e-32	-0.445431	0.941	0.976	5.20847e-28
Soat1	3.1697e-32	-0.614523	0.433	0.596	5.4072e-28
Fam174b	3.56256e-32	-0.559343	0.477	0.651	6.07737e-28
Map1b	5.39336e-32	0.381826	0.262	0.053	9.20054e-28
Cox7b	5.94338e-32	0.250768	0.961	0.94	1.01388e-27
Imp3	7.50276e-32	0.286162	0.919	0.902	1.2799e-27
Asap1	1.37156e-31	0.257394	0.361	0.119	2.33974e-27
Tusc3	1.60407e-31	0.269654	0.675	0.384	2.73639e-27
Zfp644	1.83557e-31	-0.360334	0.51	0.701	3.13131e-27
Clcn3	2.38615e-31	-0.328887	0.486	0.697	4.07054e-27
Ybx3	2.43443e-31	0.383617	0.873	0.827	4.15289e-27
Rps11	2.47692e-31	0.253581	1	1	4.22537e-27
Rpl36al	2.97055e-31	0.256408	0.981	0.975	5.06746e-27
Cdc34	3.59177e-31	0.304754	0.667	0.4	6.12719e-27
Proser2	3.69101e-31	0.312686	0.642	0.4	6.2965e-27
Rpl17	4.39868e-31	0.291764	1	1	7.50371e-27
Ndufab1	4.74726e-31	0.262878	0.938	0.91	8.09836e-27
Gipc2	5.25815e-31	-0.351584	0.328	0.602	8.96988e-27
Ddx17	6.28931e-31	-0.309058	0.715	0.902	1.07289e-26
Hprt	6.98041e-31	0.302971	0.662	0.429	1.19079e-26
Hdgf	7.35059e-31	0.274885	0.987	0.957	1.25394e-26
Klhdc8a	7.62636e-31	0.280799	0.333	0.098	1.30098e-26
Rps12	8.51875e-31	0.316002	1	1	1.45321e-26
Eloc	9.13943e-31	0.285864	0.759	0.542	1.5591e-26
Cry2	1.07689e-30	-0.340168	0.177	0.386	1.83706e-26
Mia3	1.27103e-30	-0.260235	0.303	0.555	2.16825e-26
Prdx3	1.34607e-30	0.291776	0.533	0.27	2.29626e-26
Ccn1	1.4777e-30	-0.44971	0.262	0.503	2.52081e-26
Got1	1.51265e-30	0.304556	0.382	0.144	2.58044e-26
Htra1	1.66219e-30	-0.275565	0.082	0.266	2.83553e-26
Dmkn	1.78366e-30	0.819705	0.288	0.073	3.04274e-26
Dtymk	2.06645e-30	0.335082	0.537	0.28	3.52516e-26
Pkp4	2.20083e-30	-0.282967	0.391	0.633	3.75439e-26
Mafb	2.34227e-30	0.37388	0.225	0.033	3.99568e-26
Tns4	2.37486e-30	0.435177	0.219	0.03	4.05128e-26
Polr1d	2.88099e-30	0.265448	0.969	0.947	4.91469e-26
Nr4a1	3.69427e-30	-0.405664	0.326	0.546	6.30205e-26
Lasp1	3.71816e-30	0.29616	0.901	0.816	6.34282e-26
Noct	3.82983e-30	0.271593	0.347	0.115	6.53331e-26
Etnk1	5.08313e-30	-0.32464	0.35	0.569	8.67131e-26
Rpl30	5.17883e-30	0.278371	1	1	8.83456e-26
Rpl29	6.35956e-30	0.259962	1	1	1.08488e-25
Atp6v0a4	6.82664e-30	0.41609	0.408	0.181	1.16456e-25
Slc1a5	7.59792e-30	-0.375586	0.354	0.558	1.29613e-25
Prkar1a	7.77068e-30	0.256088	0.917	0.839	1.3256e-25
Nudcd2	8.12302e-30	0.276393	0.491	0.235	1.38571e-25
Slc25a36	8.19646e-30	-0.363585	0.319	0.525	1.39823e-25
Gstp1	8.63711e-30	0.325259	0.589	0.348	1.47341e-25
Pfdn2	8.73701e-30	0.260547	0.942	0.898	1.49045e-25
Tomm7	9.39805e-30	0.261822	0.882	0.82	1.60321e-25
S100a1	9.94994e-30	0.288078	0.959	0.916	1.69736e-25
2020-09-09	1.17515e-29	0.263567	0.366	0.134	2.00468e-25
Mri1	1.22013e-29	0.252488	0.472	0.213	2.08142e-25
Bcl2a1b	1.32992e-29	0.371504	0.318	0.1	2.26871e-25
Atp6v0a1	1.54603e-29	0.347062	0.649	0.409	2.63737e-25
Use1	1.94823e-29	-0.280183	0.706	0.868	3.32348e-25
Apex1	2.16743e-29	0.30421	0.443	0.198	3.69742e-25
Trip10	2.49888e-29	0.26216	0.42	0.176	4.26284e-25
Fhl1	2.66087e-29	-0.338586	0.075	0.247	4.53918e-25
Nbeal1	2.70091e-29	-0.369036	0.727	0.856	4.60748e-25
Dsp	2.79336e-29	-0.322726	0.574	0.796	4.76519e-25
Malat1	2.92647e-29	-0.363224	0.998	1	4.99226e-25
Runx1	3.37015e-29	-0.291398	0.658	0.875	5.74913e-25
Ppp2cb	3.37221e-29	0.275401	0.433	0.186	5.75265e-25
Abca3	3.40361e-29	-0.543425	0.712	0.859	5.80622e-25
Snrpe	3.64504e-29	0.278555	0.91	0.849	6.21808e-25
Oat	4.57297e-29	-0.484634	0.413	0.589	7.80103e-25
Bax	4.86559e-29	0.42345	0.856	0.789	8.30021e-25
Cym	5.41478e-29	-0.519876	0.002	0.101	9.23708e-25
Slc25a37	5.59509e-29	0.263571	0.435	0.187	9.54466e-25
Casz1	6.50485e-29	-0.363972	0.245	0.447	1.10966e-24
Ctsd	7.30229e-29	0.364446	0.981	0.989	1.2457e-24
Cav1	8.79484e-29	-0.508247	0.121	0.305	1.50031e-24
Tmprss2	8.88536e-29	-0.309531	0.34	0.575	1.51575e-24
Sec14l4	9.79006e-29	-0.294922	0.227	0.446	1.67009e-24
Sfxn1	1.06233e-28	0.290067	0.802	0.665	1.81223e-24
Tmem205	1.28568e-28	-0.277675	0.669	0.87	2.19325e-24
Arg2	1.31825e-28	0.297204	0.301	0.089	2.2488e-24
Ier5	1.32954e-28	0.420079	0.753	0.614	2.26806e-24
Klf2	1.78943e-28	-0.377909	0.504	0.791	3.05259e-24
Lpgat1	2.00402e-28	0.277089	0.516	0.265	3.41866e-24
Leprotl1	2.05048e-28	0.291995	0.627	0.361	3.49792e-24
Atrx	2.27654e-28	-0.291859	0.849	0.958	3.88356e-24
S100g	2.38742e-28	-0.675942	0.214	0.416	4.07271e-24
Slc25a4	2.68972e-28	0.303421	0.909	0.85	4.58839e-24
Nubp1	2.70625e-28	0.273583	0.642	0.382	4.61659e-24
Tmem167	3.33147e-28	0.29198	0.793	0.648	5.68316e-24
Atic	3.40752e-28	0.254378	0.415	0.175	5.81289e-24
Pdia4	3.48718e-28	0.322808	0.535	0.298	5.94877e-24
Sgms1	4.7811e-28	0.360004	0.654	0.438	8.15608e-24
Klf3	5.61681e-28	-0.26808	0.68	0.884	9.58171e-24
Tcf25	5.7915e-28	-0.292009	0.817	0.906	9.87973e-24
Scnn1b	6.28947e-28	-0.347139	0.113	0.294	1.07292e-23
Malt1	6.96148e-28	0.359691	0.695	0.439	1.18756e-23
Ubl3	7.29841e-28	-0.295887	0.788	0.914	1.24504e-23
Tax1bp1	7.56478e-28	-0.265573	0.923	0.97	1.29047e-23
Tef	7.78045e-28	-0.258433	0.071	0.235	1.32727e-23
Tmem59	7.8444e-28	-0.282377	0.975	0.992	1.33818e-23
Elf3	8.52143e-28	-0.2742	0.546	0.813	1.45367e-23
Wnt7b	9.84391e-28	0.268149	0.285	0.08	1.67927e-23
Ogt	1.1646e-27	-0.276433	0.628	0.839	1.98668e-23
R3hdm4	1.22434e-27	0.271842	0.863	0.794	2.0886e-23
Atox1	1.36142e-27	0.264238	0.951	0.931	2.32244e-23
Kank2	1.41562e-27	-0.328475	0.261	0.464	2.41491e-23
Hk1	1.50595e-27	0.253147	0.471	0.226	2.56901e-23
Ubfd1	1.66268e-27	0.253694	0.453	0.209	2.83637e-23
Erbin	2.15894e-27	-0.303413	0.465	0.669	3.68293e-23
Fosl1	2.45408e-27	0.261878	0.263	0.065	4.18642e-23
Naa50	2.54283e-27	0.287648	0.613	0.389	4.33782e-23
Gls	2.74294e-27	0.282372	0.674	0.421	4.67918e-23
Bin1	3.05181e-27	0.265474	0.382	0.152	5.20609e-23
Gm10076	3.43744e-27	0.296021	0.848	0.777	5.86392e-23
Sub1	3.50352e-27	0.260787	0.968	0.954	5.97665e-23
Rb1cc1	3.60882e-27	-0.322346	0.633	0.78	6.15629e-23
Polr2g	3.69205e-27	0.253181	0.724	0.489	6.29827e-23
Son	4.05609e-27	-0.269744	0.946	0.976	6.91928e-23
Zwint	4.08174e-27	0.255624	0.487	0.237	6.96304e-23
Mak16	4.42344e-27	0.257276	0.433	0.193	7.54594e-23
Rgs10	4.9043e-27	0.631348	0.635	0.471	8.36624e-23
Galnt1	5.63044e-27	0.307118	0.617	0.38	9.60496e-23
Traf4	6.22572e-27	0.281597	0.652	0.428	1.06205e-22
Pim3	9.60994e-27	-0.341061	0.511	0.712	1.63936e-22
Gsap	9.85324e-27	-0.365364	0.365	0.557	1.68086e-22
Npc1	1.03694e-26	-0.337294	0.289	0.488	1.76891e-22
Rps16	1.42479e-26	0.253429	1	1	2.43054e-22
N4bp2l2	1.66874e-26	-0.290388	0.535	0.704	2.8467e-22
Eif4e	1.822e-26	0.274844	0.651	0.422	3.10815e-22
Map2k4	1.93157e-26	0.256383	0.474	0.233	3.29507e-22
Vasp	2.12722e-26	0.294449	0.808	0.722	3.62882e-22
Itgav	2.21892e-26	0.263863	0.604	0.352	3.78525e-22
Tmem163	2.24373e-26	0.288989	0.471	0.235	3.82758e-22
Cnih1	2.76756e-26	0.277901	0.517	0.274	4.72117e-22
Cbr3	3.01663e-26	0.3927	0.39	0.169	5.14607e-22
Golga4	3.32488e-26	-0.278104	0.652	0.841	5.67191e-22
Nectin1	3.65518e-26	-0.325959	0.222	0.416	6.23538e-22
Scara3	3.92286e-26	-0.297046	0.159	0.36	6.69201e-22
Hint2	3.97077e-26	-0.259084	0.719	0.868	6.77373e-22
Ralbp1	4.35783e-26	-0.31538	0.862	0.932	7.43402e-22
Pa2g4	4.52878e-26	0.318456	0.714	0.565	7.72565e-22
Tra2b	4.57953e-26	-0.271252	0.658	0.843	7.81221e-22
Hagh	4.73284e-26	0.296691	0.655	0.431	8.07374e-22
Ank3	4.85097e-26	-0.435953	0.603	0.715	8.27527e-22
Sh3d19	5.5912e-26	0.298584	0.643	0.425	9.53803e-22
Rps23	5.79432e-26	0.268141	1	1	9.88453e-22
Ssbp4	6.06809e-26	0.2698	0.67	0.445	1.03516e-21
Ehd4	6.18915e-26	0.289236	0.679	0.456	1.05581e-21
Pdia6	6.65815e-26	0.423514	0.964	0.982	1.13581e-21
Oaz2	9.96607e-26	-0.358304	0.497	0.641	1.70011e-21
1810022K09Rik	1.02058e-25	0.255932	0.645	0.413	1.741e-21
Cd24a	1.232e-25	-0.388605	0.815	0.911	2.10166e-21
Lsm2	1.26172e-25	0.283619	0.567	0.338	2.15238e-21
Ranbp1	1.31972e-25	0.345436	0.845	0.777	2.25132e-21
Filip1l	1.38885e-25	-0.26649	0.106	0.283	2.36924e-21
1190002N15Rik	1.41415e-25	-0.254554	0.077	0.237	2.4124e-21
Ccdc141	1.57288e-25	-0.350323	0.416	0.598	2.68318e-21
Irx2	2.28662e-25	-0.351026	0.285	0.47	3.90075e-21
Tpi1	2.32081e-25	0.303165	0.917	0.896	3.95907e-21
Ndufa1	2.34144e-25	0.262676	0.682	0.468	3.99426e-21
Prmt1	2.39973e-25	0.256478	0.741	0.555	4.0937e-21
Hibadh	3.06037e-25	0.273393	0.704	0.488	5.22069e-21
Cyb5r3	3.25624e-25	0.279369	0.925	0.914	5.55482e-21
Wwc1	4.46559e-25	-0.298472	0.768	0.892	7.61786e-21
Pmepa1	6.15807e-25	0.455016	0.763	0.69	1.05051e-20
Gadd45gip1	6.3925e-25	0.253823	0.715	0.526	1.0905e-20
Mt2	8.05023e-25	0.782021	0.53	0.353	1.37329e-20
Rplp1	8.05785e-25	0.261882	1	1	1.37459e-20
Abcc4	8.51651e-25	0.255137	0.352	0.14	1.45283e-20
Capn5	9.35366e-25	0.284294	0.408	0.194	1.59564e-20
Fasn	1.02868e-24	-0.797933	0.597	0.681	1.75482e-20
Timm8a1	1.04625e-24	0.258624	0.394	0.173	1.7848e-20
Chd6	1.05201e-24	-0.306486	0.443	0.622	1.79463e-20
Clmn	1.37318e-24	-0.303792	0.282	0.485	2.34251e-20
Ypel3	1.44092e-24	-0.297772	0.809	0.922	2.45807e-20
Dut	1.62434e-24	0.2808	0.463	0.233	2.77096e-20
Hsp90b1	1.62462e-24	0.445414	0.994	0.996	2.77144e-20
Akap7	1.71616e-24	-0.253587	0.105	0.273	2.92759e-20
Ppp1r15a	1.79298e-24	-0.312682	0.393	0.568	3.05864e-20
Basp1	1.87036e-24	0.608064	0.254	0.075	3.19065e-20
Bcl2l1	2.32179e-24	0.272459	0.727	0.542	3.96074e-20
Trp53bp2	2.44972e-24	-0.350876	0.255	0.435	4.17898e-20
Slc12a2	2.60211e-24	-0.253615	0.914	0.972	4.43893e-20
Atp1b3	2.98224e-24	0.251707	0.762	0.615	5.08741e-20
Cdkn1b	3.20218e-24	-0.355865	0.283	0.463	5.4626e-20
Cyp2b10	3.24629e-24	-0.531245	0.038	0.166	5.53785e-20
Tinagl1	3.29497e-24	0.422097	0.789	0.659	5.62089e-20
Dusp8	3.36699e-24	-0.261332	0.13	0.307	5.74374e-20
Btc	3.73687e-24	0.301519	0.314	0.118	6.37472e-20
Idh2	3.77192e-24	-0.270809	0.658	0.852	6.43451e-20
Lxn	3.95639e-24	0.275584	0.488	0.26	6.7492e-20
Hspa4l	3.96289e-24	0.276704	0.732	0.517	6.76029e-20
Suclg1	4.03675e-24	-0.255771	0.83	0.934	6.88629e-20
Zbtb4	4.50292e-24	-0.317602	0.338	0.514	7.68153e-20
AA986860	4.58736e-24	-0.296235	0.584	0.748	7.82557e-20
Hnrnpul2	4.71923e-24	-0.254782	0.592	0.774	8.05053e-20
Timm17a	5.15957e-24	0.258876	0.777	0.63	8.8017e-20
Mmp11	5.20986e-24	-0.309531	0.119	0.285	8.8875e-20
Hipk2	5.45437e-24	-0.4373	0.347	0.503	9.30461e-20
Rpl14	5.69022e-24	0.290016	1	1	9.70695e-20
Samhd1	6.47286e-24	-0.468209	0.284	0.456	1.1042e-19
Far1	7.60986e-24	0.418431	0.803	0.729	1.29817e-19
Kcnc3	8.03478e-24	0.52146	0.528	0.357	1.37065e-19
Adrm1	1.04258e-23	0.256508	0.753	0.576	1.77854e-19
Pcnt	1.11946e-23	-0.34367	0.404	0.573	1.90968e-19
Slc7a11	1.3259e-23	0.434952	0.166	0.019	2.26184e-19
Uba52	1.37935e-23	0.264134	0.847	0.778	2.35304e-19
Deptor	1.42914e-23	-0.290611	0.184	0.37	2.43797e-19
Cst3	1.51032e-23	-0.25254	0.985	0.999	2.57645e-19
Diaph1	1.71917e-23	-0.290009	0.694	0.848	2.93273e-19
Esam	2.06176e-23	-0.357471	0.288	0.47	3.51715e-19
Mapk6	2.19147e-23	0.29196	0.36	0.154	3.73842e-19
Tmco1	2.44678e-23	-0.272382	0.732	0.888	4.17397e-19
Gata6	2.77352e-23	-0.270497	0.566	0.756	4.73135e-19
Mme	3.05974e-23	-0.438952	0.043	0.172	5.21962e-19
Sypl	3.17821e-23	-0.269504	0.828	0.939	5.42171e-19
Ash1l	3.39349e-23	-0.275238	0.642	0.803	5.78896e-19
Atp13a3	3.67807e-23	-0.31139	0.561	0.708	6.27442e-19
Rack1	3.92699e-23	0.290077	1	1	6.69906e-19
Sdcbp2	3.93057e-23	0.578108	0.648	0.54	6.70516e-19
Chia1	4.02798e-23	-0.631409	0.133	0.305	6.87133e-19
Mpc1	4.23266e-23	-0.258354	0.788	0.932	7.2205e-19
Samd9l	4.31836e-23	-0.277827	0.271	0.472	7.36669e-19
Hif1a	4.39521e-23	0.27022	0.578	0.343	7.49779e-19
Eif2s2	4.44791e-23	0.330114	0.949	0.918	7.58769e-19
Epha4	4.81668e-23	0.303226	0.491	0.265	8.21678e-19
Hadh	5.0912e-23	-0.290897	0.503	0.666	8.68508e-19
Itpr3	5.75998e-23	0.283313	0.576	0.378	9.82595e-19
Cgn	5.98515e-23	-0.291312	0.457	0.641	1.02101e-18
Prdx4	6.18759e-23	0.502322	0.746	0.734	1.05554e-18
Llph	7.78772e-23	0.273896	0.85	0.781	1.32851e-18
Gars	8.35844e-23	0.287901	0.588	0.367	1.42587e-18
Tbc1d15	9.43387e-23	0.253703	0.599	0.368	1.60932e-18
Lsm4	1.05307e-22	0.288031	0.842	0.785	1.79643e-18
Mybbp1a	1.08941e-22	0.265502	0.493	0.273	1.85843e-18
Cebpa	1.09208e-22	0.327232	0.618	0.404	1.86298e-18
Gsk3b	1.1014e-22	-0.258959	0.76	0.91	1.87887e-18
Akr1b3	1.20187e-22	0.286098	0.663	0.465	2.05027e-18
Ly6g6c	1.41262e-22	0.323869	0.187	0.032	2.40979e-18
Shroom3	1.56998e-22	-0.273849	0.524	0.712	2.67822e-18
Frat2	1.62545e-22	0.253852	0.443	0.216	2.77286e-18
Golgb1	1.67678e-22	-0.263054	0.745	0.875	2.86042e-18
Sec61b	1.76362e-22	0.260292	0.987	0.993	3.00856e-18
Rock1	1.89863e-22	-0.271777	0.913	0.965	3.23888e-18
Fosl2	1.94065e-22	-0.306771	0.386	0.564	3.31055e-18
Setbp1	2.2803e-22	-0.261918	0.129	0.292	3.88996e-18
Col15a1	2.35014e-22	0.257356	0.124	0.001	4.0091e-18
Ptms	2.36487e-22	-0.283517	0.934	0.997	4.03423e-18
Creb3l2	2.42642e-22	-0.323884	0.266	0.436	4.13923e-18
Irx5	3.45024e-22	-0.266418	0.456	0.639	5.88577e-18
Apbb1	3.47686e-22	-0.343037	0.386	0.551	5.93117e-18
1110008P14Rik	3.55612e-22	0.285113	0.812	0.665	6.06638e-18
Klf13	4.06555e-22	-0.285916	0.629	0.767	6.93542e-18
Thbs3	4.46598e-22	-0.26733	0.097	0.252	7.61852e-18
Ctdspl	4.91649e-22	-0.320081	0.593	0.73	8.38703e-18
Rsl1d1	5.18088e-22	0.282142	0.721	0.564	8.83807e-18
Rbpjl	5.47486e-22	-0.278502	0.17	0.346	9.33956e-18
Cavin2	5.7317e-22	-0.481607	0.237	0.41	9.7777e-18
Baz2b	5.86078e-22	-0.296744	0.48	0.636	9.9979e-18
Cd59a	5.98188e-22	-0.267654	0.161	0.331	1.02045e-17
Bgn	7.74588e-22	0.296515	0.18	0.032	1.32137e-17
Tsc22d3	8.12653e-22	-0.310632	0.228	0.407	1.38631e-17
Bola2	1.00283e-21	0.260768	0.718	0.587	1.71073e-17
Tgfbr1	1.15694e-21	0.267078	0.465	0.252	1.97362e-17
H2-T23	1.19751e-21	0.253371	0.396	0.188	2.04283e-17
Hp1bp3	1.22024e-21	-0.259932	0.738	0.889	2.0816e-17
Pde7a	1.52394e-21	-0.396001	0.479	0.59	2.5997e-17
Ssh2	1.65204e-21	-0.303539	0.287	0.458	2.81821e-17
Cyp2f2	1.73352e-21	-1.37424	0.309	0.465	2.95721e-17
Cars	1.83738e-21	0.299763	0.384	0.19	3.13438e-17
Pias1	1.86965e-21	-0.314823	0.399	0.555	3.18944e-17
Lgi3	1.95233e-21	-0.557195	0.458	0.589	3.33047e-17
Lrrc59	2.12695e-21	0.290469	0.693	0.548	3.62836e-17
Brd1	2.44087e-21	-0.261552	0.646	0.795	4.16388e-17
Slc20a1	3.06595e-21	0.269106	0.268	0.096	5.2302e-17
Wwc2	3.40536e-21	-0.312933	0.571	0.705	5.80921e-17
Hopx	3.43463e-21	-0.708888	0.476	0.59	5.85914e-17
Crebbp	3.60657e-21	-0.26313	0.547	0.706	6.15244e-17
Gm47283	3.8497e-21	0.32103	0.479	0.27	6.5672e-17
Rassf1	3.989e-21	-0.286944	0.429	0.596	6.80484e-17
Ankrd12	4.3562e-21	-0.288859	0.498	0.665	7.43124e-17
Depp1	4.41862e-21	-0.267584	0.216	0.409	7.53772e-17
Dazap2	4.70927e-21	-0.252525	0.739	0.878	8.03355e-17
Rnf11	4.98195e-21	0.286569	0.816	0.717	8.49871e-17
Cadm1	5.23651e-21	-0.301684	0.689	0.805	8.93296e-17
Iah1	5.43413e-21	-0.355675	0.61	0.695	9.27008e-17
Mcl1	5.61907e-21	-0.304001	0.966	0.983	9.58557e-17
Plaur	7.0939e-21	0.496545	0.601	0.494	1.21015e-16
Psmd8	7.48969e-21	0.319445	0.934	0.917	1.27767e-16
Fam208a	7.88286e-21	-0.304895	0.37	0.533	1.34474e-16
Baz1a	9.25115e-21	0.290632	0.459	0.266	1.57815e-16
Rac3	9.97907e-21	-0.324398	0.295	0.464	1.70233e-16
Fam126b	1.07564e-20	-0.290124	0.197	0.363	1.83494e-16
Ggct	1.07893e-20	0.310376	0.338	0.145	1.84055e-16
Mtss1	1.23582e-20	-0.291693	0.29	0.464	2.10818e-16
Plet1	1.29349e-20	-0.268222	0.423	0.669	2.20657e-16
Lpcat1	1.77598e-20	-0.567655	0.689	0.778	3.02964e-16
Gnl3	1.83747e-20	0.311422	0.51	0.306	3.13454e-16
Flnb	1.89355e-20	0.353714	0.596	0.44	3.2302e-16
Usp34	1.96194e-20	-0.268619	0.691	0.824	3.34688e-16
Eif4ebp1	2.06759e-20	0.543408	0.593	0.428	3.52711e-16
Cct4	2.27039e-20	0.251399	0.884	0.817	3.87306e-16
Mgst3	2.87948e-20	0.285507	0.844	0.796	4.91211e-16
Atxn1	3.15722e-20	-0.291409	0.271	0.438	5.3859e-16
Por	3.52353e-20	-0.289919	0.732	0.838	6.01078e-16
Pabpc1	3.85873e-20	0.31133	0.953	0.932	6.58261e-16
Sema3b	4.33578e-20	-0.284011	0.203	0.367	7.39642e-16
Tmsb10	4.36115e-20	0.394189	0.951	0.92	7.43968e-16
Atg101	5.42896e-20	0.250064	0.63	0.44	9.26127e-16
Icam1	8.17668e-20	-0.315624	0.801	0.964	1.39486e-15
Dctpp1	9.68301e-20	0.2658	0.514	0.323	1.65182e-15
Vegfa	1.17057e-19	-0.395116	0.575	0.673	1.99687e-15
Eif4h	1.20416e-19	0.258755	0.965	0.975	2.05417e-15
Cish	1.2224e-19	-0.284823	0.231	0.398	2.08529e-15
Wars	1.32407e-19	0.277066	0.783	0.691	2.25873e-15
Ivns1abp	1.51152e-19	-0.267719	0.375	0.533	2.5785e-15
Bok	1.97885e-19	0.415902	0.483	0.334	3.37571e-15
Prr15l	2.06995e-19	-0.251509	0.771	0.929	3.53113e-15
Adam19	2.9407e-19	-0.25445	0.126	0.278	5.01653e-15
Gm19990	3.0058e-19	-0.281295	0.286	0.465	5.12759e-15
Bptf	3.20136e-19	-0.259832	0.735	0.868	5.46119e-15
Hmox1	3.23944e-19	0.251364	0.431	0.231	5.52616e-15
Tuba4a	3.33447e-19	0.282042	0.837	0.78	5.68828e-15
F2r	4.43497e-19	0.268676	0.4	0.202	7.56562e-15
Slc25a51	6.99243e-19	-0.312932	0.588	0.679	1.19284e-14
Camk2d	7.48231e-19	0.290463	0.895	0.855	1.27641e-14
Mthfd1	8.33326e-19	-0.26413	0.354	0.521	1.42157e-14
Cd81	9.11564e-19	0.253503	0.962	0.981	1.55504e-14
Ifitm3	9.95769e-19	0.377554	0.184	0.044	1.69868e-14
Sik1	1.11838e-18	-0.285595	0.283	0.443	1.90785e-14
Gtpbp4	1.19279e-18	0.26816	0.662	0.499	2.03478e-14
Pam	1.43041e-18	0.290088	0.765	0.69	2.44014e-14
Ecscr	1.50067e-18	0.319473	0.234	0.083	2.55999e-14
Apoe	1.5264e-18	-0.374999	0.029	0.127	2.60389e-14
Serpinb5	1.83019e-18	0.34179	0.299	0.136	3.12212e-14
Manf	2.0944e-18	0.405333	0.89	0.87	3.57284e-14
Dpysl2	2.31797e-18	-0.335672	0.226	0.374	3.95423e-14
Siva1	2.32841e-18	0.292133	0.864	0.773	3.97204e-14
Tjp1	2.44428e-18	-0.308933	0.604	0.749	4.1697e-14
Dapk1	2.78167e-18	-0.359034	0.48	0.598	4.74525e-14
Smc2	2.90274e-18	0.269235	0.245	0.087	4.95179e-14
Epb41l5	2.99437e-18	-0.323754	0.412	0.546	5.1081e-14
Gtf2i	4.11868e-18	-0.262112	0.583	0.693	7.02606e-14
Ppfibp2	4.12668e-18	-0.276547	0.276	0.435	7.0397e-14
Creld2	4.99843e-18	0.28302	0.435	0.248	8.52683e-14
Abcb1b	5.23348e-18	0.280281	0.14	0.022	8.92779e-14
Pir	5.93546e-18	0.29455	0.451	0.283	1.01253e-13
Cald1	6.61059e-18	0.361245	0.446	0.263	1.1277e-13
Cxcl1	7.58761e-18	0.539423	0.231	0.08	1.29437e-13
Ppp2r5a	8.79886e-18	-0.266656	0.61	0.705	1.501e-13
Rgcc	1.17271e-17	0.712914	0.687	0.706	2.00053e-13
Ppic	1.21575e-17	-0.303065	0.63	0.733	2.07394e-13
Rars	1.40139e-17	0.276233	0.527	0.345	2.39063e-13
Skil	1.53295e-17	-0.264331	0.506	0.665	2.61506e-13
Col4a1	1.68288e-17	0.315214	0.81	0.691	2.87083e-13
Scgb1a1	2.11926e-17	-2.97542	0.144	0.287	3.61524e-13
Pink1	2.22384e-17	-0.288385	0.323	0.467	3.79364e-13
Tnrc6b	2.55026e-17	-0.259059	0.497	0.63	4.3505e-13
Foxn3	3.5829e-17	-0.26551	0.436	0.576	6.11206e-13
Rictor	5.40263e-17	0.302129	0.653	0.489	9.21635e-13
Serpine2	5.50165e-17	0.272566	0.535	0.339	9.38526e-13
Phlda3	5.82847e-17	0.374362	0.386	0.208	9.94279e-13
Npnt	6.75445e-17	-0.320194	0.565	0.69	1.15224e-12
Bst2	8.20651e-17	0.260088	0.546	0.35	1.39995e-12
Cux1	1.0594e-16	-0.285129	0.759	0.86	1.80723e-12
Pdia3	1.15345e-16	0.28209	0.968	0.972	1.96767e-12
Cxcl3	1.6272e-16	0.326953	0.113	0.011	2.77584e-12
C3	1.64195e-16	-0.480291	0.175	0.319	2.80099e-12
Cdc20	1.79882e-16	0.355934	0.112	0.011	3.06861e-12
Ier3	2.48974e-16	0.445401	0.903	0.864	4.24725e-12
Peli1	2.53718e-16	-0.262305	0.507	0.627	4.32818e-12
Mal2	3.25346e-16	-0.264139	0.865	0.935	5.55008e-12
Itga3	4.67306e-16	0.280653	0.569	0.391	7.97177e-12
Nebl	5.94735e-16	-0.346683	0.305	0.442	1.01456e-11
Slc43a2	6.68038e-16	-0.259292	0.204	0.346	1.13961e-11
Tspan1	6.70063e-16	0.473407	0.774	0.807	1.14306e-11
Cntrl	1.6136e-15	-0.274079	0.218	0.36	2.75264e-11
Cdk1	1.91356e-15	0.354734	0.106	0.011	3.26435e-11
Bend7	2.15274e-15	-0.286256	0.566	0.668	3.67236e-11
Akap8l	2.76238e-15	-0.260448	0.293	0.432	4.71234e-11
Ube2c	3.80257e-15	0.572252	0.107	0.012	6.4868e-11
Cdk12	3.97961e-15	-0.262544	0.428	0.55	6.78881e-11
Mthfd2	4.4721e-15	0.274462	0.264	0.116	7.62896e-11
Irs2	5.22951e-15	-0.294736	0.323	0.453	8.92102e-11
Rasgef1b	7.77394e-15	-0.30333	0.416	0.532	1.32616e-10
Tns1	1.0176e-14	-0.263801	0.592	0.717	1.73592e-10
Stat3	1.04131e-14	-0.250763	0.639	0.727	1.77638e-10
Ephx1	1.10851e-14	-0.254364	0.183	0.325	1.891e-10
Fam53b	4.77751e-14	-0.279595	0.386	0.501	8.14995e-10
Sphk1	5.50539e-14	-0.338041	0.237	0.36	9.39165e-10
Zfp704	6.57733e-14	-0.273624	0.43	0.544	1.12203e-09
Ccdc71l	7.39563e-14	0.258161	0.234	0.102	1.26162e-09
Sh2d4a	8.25631e-14	-0.253914	0.489	0.601	1.40844e-09
Nectin3	1.49005e-13	-0.338293	0.547	0.622	2.54188e-09
Fam213a	1.63688e-13	0.836231	0.745	0.722	2.79236e-09
Ugdh	1.67297e-13	0.289416	0.355	0.212	2.85391e-09
Ly6k	1.78575e-13	0.675324	0.493	0.413	3.04631e-09
Pi4k2b	1.92186e-13	-0.322729	0.767	0.788	3.27849e-09
Tfdp2	3.34325e-13	-0.287928	0.352	0.468	5.70325e-09
Fgfr2	4.07559e-13	-0.336185	0.381	0.492	6.95255e-09
Capg	5.2427e-13	0.591532	0.641	0.651	8.94353e-09
Igfbp6	5.60136e-13	-0.273873	0.429	0.587	9.55536e-09
Eps8l2	5.91847e-12	-0.263593	0.389	0.499	1.00963e-07
Gprc5a	6.60555e-12	-0.367264	0.888	0.916	1.12684e-07
Btg1	9.80668e-12	0.258438	0.896	0.918	1.67292e-07
Itga6	1.10454e-11	0.41001	0.688	0.677	1.88423e-07
H2afz	1.76692e-11	0.344802	0.994	0.996	3.01418e-07
Prc1	1.77407e-11	0.257064	0.103	0.022	3.02639e-07
Hdc	1.87476e-11	0.493451	0.361	0.231	3.19815e-07
Crip2	2.19588e-11	-0.355662	0.954	0.986	3.74595e-07
Ankrd40	7.17604e-11	-0.250561	0.511	0.572	1.22416e-06
Ppp1r14c	1.03182e-10	-0.330558	0.546	0.618	1.76019e-06
Npc2	1.06977e-10	0.309289	0.993	1	1.82492e-06
Chic2	1.21611e-10	0.28492	0.776	0.742	2.07456e-06
AW112010	1.99537e-10	0.286146	0.281	0.475	3.4039e-06
Ptgr1	2.20701e-10	0.273464	0.76	0.794	3.76494e-06
Kcnk2	2.53835e-10	-0.262236	0.173	0.283	4.33018e-06
Plat	2.60549e-10	0.567434	0.206	0.104	4.4447e-06
Tff1	3.78089e-10	0.505759	0.722	0.783	6.44983e-06
Nupr1	4.1487e-10	0.762676	0.608	0.508	7.07728e-06
Dusp1	8.16528e-10	-0.283558	0.861	0.949	1.39292e-05
S100a10	9.43265e-10	0.339312	0.942	0.957	1.60912e-05
Tead1	9.55483e-10	-0.29884	0.47	0.537	1.62996e-05
Cp	1.08084e-09	-0.353389	0.048	0.122	1.84381e-05
Mlph	1.19597e-09	0.252366	0.698	0.688	2.04021e-05
Asns	1.28384e-09	0.311887	0.432	0.296	2.1901e-05
Pold4	1.29125e-09	0.260551	0.544	0.406	2.20275e-05
Slc34a2	1.79521e-09	-0.606024	0.548	0.586	3.06245e-05
Prrg3	1.83665e-09	-0.322068	0.37	0.476	3.13313e-05
Serpinb6a	2.93228e-09	0.336113	0.941	0.935	5.00218e-05
Crlf3	3.24555e-09	-0.290396	0.249	0.334	5.53658e-05
Crlf1	5.40597e-09	0.326754	0.498	0.404	9.22205e-05
Etv5	5.97202e-09	-0.412747	0.297	0.368	0.000101877
Ckmt1	1.31374e-08	0.342518	0.692	0.733	0.000224111
Tuba1a	2.73891e-08	-0.388135	0.268	0.353	0.000467231
Sema3a	4.82427e-08	-0.253146	0.154	0.235	0.000822973
Rtn4	6.48904e-08	0.282657	0.851	0.857	0.00110697
Odc1	7.09839e-08	0.253374	0.585	0.478	0.00121091
Ptpre	7.59478e-08	-0.291829	0.261	0.337	0.00129559
Lrg1	7.86828e-08	-0.367547	0.29	0.407	0.00134225
Nars	1.26714e-07	0.263134	0.704	0.679	0.00216161
Cwh43	1.47416e-07	0.309568	0.281	0.201	0.00251477
Stmn1	1.64189e-07	0.329103	0.52	0.427	0.0028009
Pxdc1	1.77102e-07	-0.305514	0.298	0.36	0.00302119
Ddit3	3.70922e-07	0.253944	0.36	0.251	0.00632756
Lrp2	4.01207e-07	-0.267515	0.264	0.359	0.00684419
Aprt	1.01689e-06	0.277531	0.737	0.755	0.0173471
Gm26917	1.38114e-06	-1.00035	0.424	0.517	0.0235608
Gkn1	1.50841e-06	0.687212	0.372	0.51	0.025732
Epas1	2.16878e-06	-0.324149	0.57	0.558	0.0369972
Myh7	1.39486e-05	-0.379062	0.613	0.596	0.237949
Anxa10	1.95661e-05	0.293786	0.336	0.508	0.333778
Ndnf	2.75063e-05	0.286645	0.662	0.583	0.469231
Sftpa1	3.29847e-05	-0.415409	0.694	0.803	0.562686
Sema3c	3.54694e-05	0.294689	0.524	0.501	0.605072
Lcn2	0.000126564	-0.306747	0.339	0.425	1
Napsa	0.000151477	0.583476	0.714	0.935	1
Trf	0.000310371	0.872169	0.441	0.404	1
Cdkn1a	0.000320093	0.413979	0.754	0.82	1
Rhoc	0.000768193	0.447618	0.53	0.56	1
Igfbp7	0.00369759	-0.26787	0.835	0.845	1
Hist1h1c	0.0138639	0.377477	0.499	0.501	1
Msln	0.0250554	0.534221	0.429	0.591	1
H2-Aa	0.0306344	-0.278432	0.547	0.535	1
Lamp3	0.0340057	-0.308393	0.557	0.525	1
Rdh10	0.0883682	0.336186	0.4	0.421	1
Cxcl5	0.128529	0.525587	0.167	0.202	1
Cdkn2a	0.226343	0.263666	0.513	0.536	1
Ly6d	0.361937	0.326754	0.727	0.816	1
Cdc42ep5	0.431206	0.295866	0.574	0.695	1
Atf5	0.444251	-0.273275	0.383	0.356	1
Phgr1	0.526467	0.360424	0.409	0.51	1
Gkn2	0.646626	0.751651	0.428	0.492	1
Ctsl	0.797434	0.759158	0.638	0.812	1

## Sheet: BP control vs. BPN control
	p_val	avg_logFC	pct.1	pct.2	p_val_adj
Sftpb	0	4.16518	0.85	0.348	0
Napsa	0	3.10759	0.714	0.059	0
Ager	0	2.78652	0.724	0.076	0
Npc2	0	2.42201	0.993	0.985	0
Rgcc	0	2.38073	0.687	0.045	0
Sparc	0	2.11457	0.73	0.035	0
Ctsh	0	1.98462	0.994	0.981	0
Areg	0	1.97496	0.964	0.583	0
Aqp5	0	1.93958	0.879	0.384	0
Scd1	0	1.9057	0.702	0.07	0
Cd36	0	1.87532	0.684	0.028	0
Igfbp7	0	1.75958	0.835	0.182	0
Ly6c1	0	1.64312	0.749	0.066	0
Crip2	0	1.6036	0.954	0.459	0
Ndnf	0	1.59255	0.662	0.037	0
Msn	0	1.57819	0.931	0.132	0
Ereg	0	1.56869	0.722	0.129	0
Icam1	0	1.52439	0.801	0.106	0
Lpcat1	0	1.51624	0.689	0.024	0
Bcam	0	1.45641	0.889	0.41	0
Tceal9	0	1.43994	0.906	0.437	0
Dram1	0	1.38734	0.671	0.013	0
Atp11a	0	1.3429	0.685	0.047	0
Bmp4	0	1.33771	0.857	0.28	0
Plin2	0	1.31697	0.883	0.287	0
Rgs10	0	1.31096	0.635	0.02	0
Col4a1	0	1.22776	0.81	0.185	0
Acsl4	0	1.21487	0.763	0.095	0
Prnp	0	1.15662	0.715	0.051	0
Siva1	0	1.14637	0.864	0.276	0
Rai14	0	1.0571	0.901	0.366	0
Ndufa4	0	1.03443	0.995	0.794	0
Serpinh1	0	0.980413	0.695	0.027	0
Adssl1	0	0.944364	0.638	0.028	0
Gja1	0	0.942214	0.593	0.012	0
Lrrc8c	0	0.931806	0.685	0.017	0
Nkx2-1	0	0.919747	0.642	0.011	0
Fermt2	0	0.668893	0.567	0.007	0
Stard10	0	-0.663536	0.988	0.999	0
Bag1	0	-0.724585	0.969	0.999	0
Tspan8	0	-0.845169	0.995	1	0
Fam3b	0	-0.873492	0.035	0.726	0
Fermt1	0	-0.933644	0.241	0.892	0
Tm9sf3	0	-0.987267	0.833	0.998	0
Tspan13	0	-1.02332	0.444	0.937	0
Tmem54	0	-1.02812	0.287	0.877	0
Ablim1	0	-1.02814	0.276	0.926	0
Muc1	0	-1.04946	0.902	0.998	0
Abcc3	0	-1.07938	0.377	0.925	0
Degs2	0	-1.11709	0.149	0.882	0
Gm3336	0	-1.13441	0.091	0.773	0
Ociad2	0	-1.22053	0.5	0.987	0
Ms4a8a	0	-1.23391	0.067	0.804	0
Chpt1	0	-1.24154	0.36	0.932	0
Pglyrp1	0	-1.24501	0.614	0.981	0
Bcas1	0	-1.27064	0.109	0.836	0
Gcnt3	0	-1.28214	0.265	0.937	0
Glul	0	-1.32715	0.394	0.965	0
Car2	0	-1.36147	0.443	0.949	0
Il18	0	-1.36333	0.18	0.855	0
Smim6	0	-1.37664	0.172	0.873	0
Phgr1	0	-1.38181	0.409	0.943	0
Vsig1	0	-1.40579	0.143	0.888	0
Ifi27l2b	0	-1.42916	0.224	0.895	0
Ctse	0	-1.45356	0.382	0.986	0
Bace2	0	-1.48984	0.285	0.965	0
Mgst2	0	-1.50663	0.359	0.966	0
Ly6d	0	-1.51741	0.727	0.993	0
Oit1	0	-1.51922	0.249	0.969	0
Sult1c2	0	-1.63755	0.15	0.875	0
Galnt7	0	-1.64784	0.265	0.973	0
AA467197	0	-1.66236	0.187	0.904	0
Anxa10	0	-1.71265	0.336	0.968	0
Fxyd3	0	-1.72984	0.797	1	0
Cyp3a13	0	-1.77896	0.279	0.875	0
Sptssb	0	-1.77999	0.158	0.841	0
Gsto1	0	-1.85319	0.918	1	0
Psca	0	-1.92834	0.83	0.998	0
Gsta4	0	-2.1503	0.914	0.999	0
Plac8	0	-2.20932	0.447	1	0
Mucl3	0	-2.22603	0.194	0.899	0
Lgals4	0	-2.37993	0.406	0.997	0
Pigr	0	-2.50856	0.291	0.929	0
Gsta1	0	-2.57465	0.253	0.979	0
Gkn1	0	-3.60262	0.372	0.898	0
Tff1	0	-3.72097	0.722	0.996	0
Ppp1r14c	1.74748e-306	1.05797	0.546	0.008	2.98102e-302
Cd74	1.847e-306	2.6724	0.756	0.201	3.15079e-302
Tmem213	4.3212e-304	1.63339	0.556	0.016	7.37153e-300
Mgst1	3.83613e-303	1.45144	0.843	0.314	6.54405e-299
Bex3	3.21719e-300	1.09162	0.792	0.223	5.48821e-296
Lpin2	9.23769e-300	0.964698	0.813	0.248	1.57586e-295
Ern2	7.93958e-298	-0.846629	0.062	0.733	1.35441e-293
Clip4	9.932e-298	0.788476	0.529	0.006	1.6943e-293
Parm1	2.09131e-297	-1.03489	0.252	0.868	3.56757e-293
Col4a2	4.63289e-297	0.854214	0.706	0.122	7.90325e-293
Rgs17	4.81931e-297	-1.22644	0.091	0.752	8.22126e-293
Fam3c	9.51812e-296	0.782412	0.683	0.092	1.6237e-291
Lamp3	3.71775e-294	1.41321	0.557	0.025	6.34211e-290
Hp	1.62105e-293	2.26531	0.592	0.048	2.76534e-289
Gjb1	6.10009e-293	-1.04976	0.165	0.802	1.04061e-288
Serpine2	2.96241e-292	0.719912	0.535	0.012	5.05358e-288
Bmp1	2.96895e-291	0.705687	0.53	0.011	5.06473e-287
Arl4c	3.3328e-291	1.01622	0.689	0.115	5.68542e-287
Selenbp1	1.53719e-290	2.11709	0.796	0.337	2.62229e-286
Krt20	1.95126e-290	-1.41316	0.133	0.788	3.32865e-286
Onecut2	5.94738e-290	-1.31153	0.305	0.889	1.01456e-285
Cstb	3.64146e-289	0.932201	0.974	0.8	6.21197e-285
Sdc1	3.38807e-286	0.986261	0.98	0.883	5.7797e-282
Pkib	7.23913e-286	0.851012	0.565	0.032	1.23492e-281
Cxcl15	8.51233e-286	2.94558	0.651	0.106	1.45212e-281
2210407C18Rik	2.68187e-285	-2.08473	0.221	0.804	4.57501e-281
Sftpa1	2.58586e-283	3.91294	0.694	0.164	4.41121e-279
Akr1c13	5.15497e-281	-0.95368	0.19	0.827	8.79386e-277
Kcnc3	3.01379e-280	1.0026	0.528	0.018	5.14123e-276
Ptges	6.18542e-280	0.797222	0.701	0.105	1.05517e-275
Lmo4	2.02364e-279	-0.97187	0.571	0.937	3.45213e-275
Cnn2	4.63974e-278	0.916191	0.924	0.525	7.91494e-274
Gjb4	3.08756e-277	0.929687	0.574	0.045	5.26707e-273
Oasl1	2.43762e-275	-1.07715	0.106	0.741	4.15833e-271
Crlf1	2.04453e-273	0.933094	0.498	0.008	3.48777e-269
Cd200	1.07461e-272	0.757193	0.547	0.032	1.83317e-268
Cpd	1.1929e-272	-0.894148	0.446	0.905	2.03497e-268
Btg3	8.9036e-272	0.930717	0.827	0.323	1.51887e-267
Emp2	7.18248e-271	1.01512	0.981	0.812	1.22526e-266
Avpi1	5.21741e-269	0.945369	0.951	0.747	8.90037e-265
Meg3	1.51201e-268	2.56409	0.575	0.062	2.57934e-264
Tmem176b	2.25492e-268	0.994734	0.958	0.674	3.84667e-264
Slc44a4	9.58147e-267	-0.770648	0.137	0.753	1.6345e-262
Agr2	2.18171e-264	-1.72298	0.147	0.74	3.72177e-260
Eps8l3	4.80942e-264	-0.958143	0.237	0.871	8.20439e-260
Cwh43	5.73603e-264	-0.935253	0.281	0.875	9.78509e-260
Slc34a2	3.60021e-263	2.41416	0.548	0.048	6.1416e-259
H2-Ab1	5.12502e-263	1.28289	0.592	0.067	8.74277e-259
Atp6v1g1	9.34576e-262	0.720233	0.996	0.972	1.59429e-257
Smpd3	3.97983e-260	-0.834114	0.133	0.741	6.78919e-256
Cd2ap	1.1275e-259	-0.814246	0.913	0.998	1.92341e-255
Ptprn	1.79882e-259	1.22008	0.613	0.088	3.0686e-255
Mgst3	4.24499e-259	-0.798031	0.844	0.987	7.24152e-255
Hmgn1	2.27606e-258	0.901462	0.959	0.672	3.88273e-254
Myh7	1.22581e-257	0.846374	0.613	0.089	2.09112e-253
Klf4	3.058e-257	-0.970838	0.637	0.969	5.21664e-253
Tm4sf1	9.78174e-257	-1.43198	0.36	0.89	1.66867e-252
Pdlim2	1.36426e-256	0.863395	0.675	0.143	2.32729e-252
Kif5c	7.67507e-256	-0.867541	0.217	0.806	1.30929e-251
Tspan1	9.77893e-256	-0.890835	0.774	0.992	1.66819e-251
Slc25a4	3.13973e-255	0.856376	0.909	0.458	5.35607e-251
Syt8	1.0017e-254	-0.803703	0.198	0.8	1.7088e-250
Rab15	2.32008e-254	0.624755	0.51	0.026	3.95782e-250
Tmem45b	2.58648e-254	-0.738436	0.08	0.694	4.41228e-250
Akr1c12	1.43702e-253	-0.802119	0.092	0.717	2.4514e-249
H2-Aa	1.65082e-253	1.22221	0.547	0.049	2.81614e-249
Gkn2	6.10705e-252	-3.28778	0.428	0.84	1.0418e-247
Cryab	3.26125e-250	0.850701	0.544	0.047	5.56337e-246
Lgi3	6.81588e-249	0.764158	0.458	0.006	1.16272e-244
H2-Eb1	3.10498e-246	1.03104	0.53	0.044	5.29679e-242
Slc9a3r2	7.34539e-246	0.843912	0.678	0.164	1.25305e-241
Rbpms	1.79278e-245	0.838166	0.934	0.576	3.0583e-241
Map1lc3a	2.85485e-244	0.899403	0.902	0.513	4.87008e-240
Gclc	1.13657e-241	1.53475	0.911	0.652	1.93888e-237
Ttll7	2.49655e-240	0.740282	0.72	0.203	4.25886e-236
Chil1	2.69543e-240	2.62521	0.52	0.05	4.59814e-236
Tmem176a	7.37935e-240	0.93823	0.953	0.701	1.25884e-235
P2rx4	9.15643e-240	-0.814102	0.496	0.915	1.562e-235
Emb	1.19379e-239	0.601625	0.455	0.01	2.03648e-235
Lypd8	1.5726e-239	-2.07297	0.087	0.665	2.6827e-235
Tkt	3.54176e-239	-0.739876	0.811	0.978	6.04188e-235
Fer1l4	3.26858e-238	-0.684204	0.05	0.633	5.57588e-234
Hopx	3.46092e-238	0.929475	0.476	0.022	5.90399e-234
Elf3	2.56201e-237	-0.844578	0.546	0.938	4.37053e-233
Ccnd2	2.6733e-237	-1.35863	0.288	0.817	4.56038e-233
Rrbp1	4.03618e-237	-0.674192	0.943	0.998	6.88533e-233
Ces2c	9.7832e-237	-1.37651	0.045	0.629	1.66892e-232
Prom1	1.03294e-235	-0.727238	0.096	0.682	1.76209e-231
Ak3	1.7675e-235	-0.721216	0.433	0.871	3.01518e-231
Rdx	8.46708e-234	0.688682	0.767	0.238	1.4444e-229
Zfpm1	1.09489e-233	-0.745845	0.194	0.752	1.86778e-229
Slc15a2	3.6982e-233	0.707448	0.466	0.021	6.30876e-229
Crip1	3.86425e-233	-1.14141	0.65	0.949	6.59202e-229
Lrrc26	6.49694e-232	-0.854199	0.338	0.841	1.10831e-227
Suox	2.10677e-231	-0.802033	0.113	0.679	3.59393e-227
AW112010	8.47452e-231	-1.65061	0.281	0.803	1.44567e-226
Cd24a	1.30766e-230	-0.800691	0.815	0.982	2.23074e-226
Sri	2.2096e-230	-0.639842	0.924	0.996	3.76936e-226
Duox2	2.21622e-230	-1.01925	0.077	0.655	3.78064e-226
Prr13	3.19555e-229	-0.711165	0.848	0.987	5.4513e-225
Lgals3	5.00709e-229	0.953251	0.981	0.778	8.54159e-225
Timp3	3.38504e-228	0.841975	0.436	0.01	5.77454e-224
Eva1a	7.58978e-228	0.566913	0.47	0.025	1.29474e-223
Fam162a	9.28648e-226	0.837465	0.875	0.507	1.58418e-221
Gipc2	3.95509e-225	-0.702102	0.328	0.877	6.74698e-221
Sfta2	1.21956e-224	1.52814	0.675	0.235	2.08045e-220
Aldh1a1	1.7096e-224	-1.16832	0.189	0.736	2.9164e-220
Ptgs1	1.72375e-224	0.748819	0.473	0.031	2.94055e-220
Foxq1	5.99434e-224	-0.918359	0.743	0.961	1.02257e-219
Npw	7.18033e-224	0.722746	0.471	0.03	1.22489e-219
Hnf4a	5.68004e-223	-0.690375	0.228	0.779	9.68958e-219
AU021092	1.33825e-221	1.00361	0.595	0.12	2.28292e-217
Pdzk1ip1	5.79358e-221	-1.14903	0.244	0.761	9.88327e-217
Rflnb	5.22923e-220	-0.688508	0.074	0.631	8.92054e-216
Tm4sf5	2.35397e-219	-0.989817	0.046	0.608	4.01564e-215
Galnt4	3.64662e-219	-0.66221	0.106	0.663	6.22076e-215
Ugt2b34	4.6025e-213	-0.820143	0.052	0.593	7.8514e-209
Rbp4	8.45667e-213	0.85177	0.509	0.056	1.44262e-208
Pla2g10	9.80298e-213	-0.761727	0.025	0.561	1.67229e-208
Egfl6	1.76271e-212	0.75829	0.468	0.038	3.00701e-208
Ppp1r9a	1.86207e-212	0.570256	0.505	0.055	3.1765e-208
Gmds	3.7977e-212	-1.02125	0.295	0.762	6.47849e-208
Cyp2j6	4.38032e-212	-0.636807	0.084	0.628	7.47239e-208
Cldn3	4.91817e-212	0.834716	0.963	0.474	8.38991e-208
Lgals3bp	1.61178e-211	-0.791542	0.414	0.87	2.74953e-207
Clu	2.1336e-211	-0.78843	1	1	3.63971e-207
Klc3	4.86975e-211	0.596357	0.625	0.139	8.3073e-207
H2-DMb1	1.29089e-209	0.740497	0.52	0.069	2.20213e-205
Lrrk2	3.45878e-208	0.644533	0.404	0.01	5.90032e-204
Atp6v0a4	5.83733e-208	0.636151	0.408	0.012	9.95791e-204
Acp5	7.30781e-208	-0.655116	0.352	0.839	1.24664e-203
Slc9a4	2.58445e-207	-0.684201	0.082	0.617	4.40881e-203
Avil	1.31358e-206	-0.858029	0.055	0.587	2.24083e-202
Kcnn4	2.14321e-206	-0.652319	0.116	0.671	3.65611e-202
Ptgs2os2	3.36728e-206	0.522791	0.392	0.006	5.74424e-202
Duoxa2	4.1105e-206	-1.35791	0.076	0.607	7.0121e-202
Vil1	5.27342e-206	-0.639981	0.058	0.591	8.99593e-202
Ddah2	6.57265e-205	0.654781	0.502	0.061	1.12123e-200
Eps8	3.15329e-204	-0.703391	0.253	0.783	5.3792e-200
Hspb8	6.70628e-203	0.517332	0.396	0.009	1.14402e-198
Bcr	2.34504e-201	1.11587	0.726	0.305	4.0004e-197
Soat1	1.26471e-200	0.536862	0.433	0.026	2.15746e-196
Sftpc	2.99697e-200	5.19827	0.874	0.711	5.11252e-196
Perp	6.14596e-200	-0.605357	0.557	0.935	1.04844e-195
Procr	3.98428e-199	1.19866	0.442	0.032	6.79678e-195
Sytl2	5.70117e-199	-0.752035	0.281	0.792	9.72562e-195
Ccdc83	6.28078e-199	0.444767	0.375	0.004	1.07144e-194
Cdc42ep3	6.863e-199	0.522784	0.446	0.034	1.17076e-194
Dnaja1	1.38982e-197	0.669731	0.996	0.988	2.3709e-193
Rab27b	7.84675e-197	-0.70981	0.365	0.822	1.33858e-192
Sorcs2	5.73662e-196	0.420933	0.372	0.005	9.7861e-192
Fam83e	3.87312e-195	-0.62261	0.265	0.769	6.60715e-191
Glrx	6.00477e-195	0.94451	0.786	0.444	1.02435e-190
Adk	4.83472e-194	0.618318	0.655	0.193	8.24756e-190
Gde1	5.23805e-194	0.962502	0.775	0.406	8.93558e-190
Lsr	1.27885e-193	-0.584346	0.813	0.983	2.1816e-189
Nt5c3	1.91604e-193	-0.754243	0.453	0.841	3.26858e-189
Iyd	4.31682e-193	-0.843323	0.05	0.556	7.36406e-189
Tspan11	5.24078e-192	0.522812	0.373	0.007	8.94025e-188
Socs2	8.55412e-192	0.876067	0.768	0.382	1.45925e-187
Ces2g	2.07528e-191	-0.643432	0.022	0.518	3.54023e-187
Cdc42ep5	5.16675e-191	-0.618555	0.574	0.967	8.81396e-187
Matn4	1.02718e-189	0.477866	0.373	0.009	1.75227e-185
Spp1	3.30289e-189	-1.56192	0.471	0.838	5.6344e-185
Rnf149	5.75668e-189	0.58591	0.681	0.212	9.82032e-185
Ppic	3.78881e-188	0.730789	0.63	0.174	6.46332e-184
Papss2	6.18744e-188	-0.578167	0.036	0.53	1.05552e-183
Adrb2	8.34735e-188	0.509482	0.446	0.043	1.42397e-183
Atxn10	9.01408e-187	0.626727	0.931	0.688	1.53771e-182
Cldn18	9.41217e-187	-0.73707	0.989	0.999	1.60562e-182
Snx30	1.47572e-186	0.471249	0.452	0.047	2.51743e-182
Elovl5	1.70855e-186	0.681037	0.666	0.228	2.91462e-182
Lmo7	9.0943e-186	0.917938	0.961	0.821	1.5514e-181
Ptprr	1.33716e-185	-0.585099	0.054	0.554	2.28106e-181
Myo6	1.45578e-185	-0.60312	0.261	0.747	2.48341e-181
Maged1	3.09501e-185	0.632502	0.635	0.179	5.27977e-181
Rep15	6.74973e-185	-0.830056	0.027	0.513	1.15144e-180
Gata5	9.45451e-185	-0.568355	0.099	0.608	1.61284e-180
Ethe1	1.01408e-184	-0.744763	0.426	0.824	1.72992e-180
Acot7	1.15068e-184	0.876593	0.714	0.297	1.96295e-180
Prrg3	1.23621e-184	0.559598	0.37	0.011	2.10886e-180
Styk1	1.70002e-184	-0.593091	0.134	0.643	2.90006e-180
Gstm1	6.05868e-183	-0.98965	0.471	0.852	1.03355e-178
Ank3	1.01858e-182	0.726636	0.603	0.166	1.73759e-178
Marveld1	1.2072e-182	0.595601	0.498	0.079	2.05936e-178
Plxnb1	5.82005e-182	0.505576	0.511	0.084	9.92842e-178
Gch1	6.16654e-182	-0.750431	0.276	0.74	1.05195e-177
Neurl3	1.20407e-181	-0.802113	0.21	0.714	2.05403e-177
Dusp6	1.24881e-181	0.866007	0.855	0.54	2.13035e-177
Tent5a	5.36808e-181	-0.668787	0.06	0.549	9.15741e-177
Snx7	7.05148e-181	0.784491	0.647	0.226	1.20291e-176
Sec14l3	9.00165e-181	0.63154	0.352	0.006	1.53559e-176
Syt16	1.06572e-180	-0.515837	0.031	0.51	1.81802e-176
Ehd2	1.76649e-180	0.681364	0.79	0.414	3.01345e-176
Gdf15	2.06502e-180	1.21611	0.406	0.03	3.52272e-176
P4ha1	5.17261e-180	0.53772	0.542	0.11	8.82396e-176
Arap2	1.18489e-179	-0.617759	0.204	0.697	2.02131e-175
Cebpa	1.3785e-179	0.748923	0.618	0.198	2.35158e-175
Itga1	3.04843e-179	-0.705398	0.166	0.66	5.20032e-175
Cyb5r3	3.17815e-179	0.659201	0.925	0.758	5.42161e-175
Fgfr2	7.20779e-179	0.489865	0.381	0.019	1.22958e-174
Ctsc	7.26055e-179	1.02595	0.875	0.638	1.23858e-174
Fam213a	1.40995e-178	-0.832632	0.745	0.964	2.40523e-174
Arl14	1.4514e-178	-0.627208	0.04	0.519	2.47594e-174
Mia3	1.98517e-178	-0.662514	0.303	0.754	3.3865e-174
Ptgs2	2.66537e-178	0.645742	0.378	0.018	4.54685e-174
Gpa33	3.00276e-178	-0.608742	0.156	0.678	5.1224e-174
Smim1	5.64602e-178	0.399413	0.361	0.011	9.63154e-174
Clca1	5.76704e-178	-2.70248	0.078	0.551	9.838e-174
Pttg1ip	7.37201e-178	-0.825424	0.621	0.91	1.25759e-173
Igfbp6	1.86706e-177	0.943727	0.429	0.048	3.18502e-173
Csrp2	2.23927e-177	-0.970474	0.157	0.624	3.81998e-173
Tmem163	1.336e-176	0.501204	0.471	0.066	2.27908e-172
Sdcbp2	2.0731e-176	-0.658867	0.648	0.947	3.53651e-172
Hecw1	4.15489e-176	0.40896	0.343	0.006	7.08782e-172
Klhdc8a	1.21308e-175	0.416676	0.333	0.002	2.06939e-171
Pla2g1b	2.49745e-175	0.525067	0.399	0.031	4.2604e-171
Pnrc1	8.08488e-175	0.671637	0.921	0.65	1.3792e-170
St3gal1	3.15086e-174	0.584571	0.582	0.152	5.37505e-170
Tesc	6.15014e-174	-0.943358	0.044	0.513	1.04915e-169
Gkn3	3.84488e-173	-2.11368	0.119	0.574	6.55899e-169
Stk39	7.38668e-173	0.649232	0.617	0.194	1.26009e-168
Mdfic	1.06132e-172	0.429396	0.402	0.033	1.8105e-168
Capg	2.47667e-171	-0.669798	0.641	0.968	4.22496e-167
Ano7	5.52944e-171	-0.530903	0.024	0.481	9.43267e-167
Myl6	6.10797e-171	0.498221	0.999	1	1.04196e-166
Itga9	1.41728e-170	0.469088	0.328	0.004	2.41773e-166
Tanc2	1.6952e-170	0.443287	0.451	0.06	2.89185e-166
Hdc	3.04762e-170	1.03458	0.361	0.018	5.19894e-166
Ube2i	2.10322e-169	0.542405	0.96	0.792	3.58788e-165
Nectin3	2.73664e-169	0.537293	0.547	0.126	4.66844e-165
Pgap1	3.35538e-169	-0.610285	0.37	0.799	5.72394e-165
Atp6v0c	4.09802e-169	0.482702	0.999	0.989	6.99081e-165
Slpi	4.55197e-169	0.692881	0.338	0.008	7.7652e-165
Srp14	2.15017e-168	0.49278	0.981	0.882	3.66797e-164
Mcpt2	2.4308e-168	-1.53567	0.053	0.517	4.1467e-164
Uap1	7.67375e-168	-0.614987	0.302	0.739	1.30906e-163
Inf2	1.95996e-167	0.514268	0.595	0.16	3.34349e-163
Malt1	2.649e-167	0.975859	0.695	0.297	4.51893e-163
Renbp	6.79641e-167	0.390397	0.36	0.018	1.1594e-162
Ripply3	1.14092e-166	-0.671219	0.052	0.518	1.9463e-162
Myo1a	2.10866e-166	-0.562025	0.029	0.482	3.59716e-162
Cmtm7	4.22138e-166	-0.817318	0.166	0.61	7.20125e-162
Igf1r	7.09836e-166	0.490171	0.484	0.083	1.21091e-161
Mvb12b	7.45508e-166	0.33959	0.331	0.007	1.27176e-161
Rgs4	5.89586e-165	0.734079	0.338	0.012	1.00577e-160
Lgr4	9.62117e-165	-0.486118	0.025	0.472	1.64127e-160
Phldb2	9.87518e-165	0.671318	0.845	0.508	1.68461e-160
Apbb1	1.00387e-164	0.405153	0.386	0.031	1.7125e-160
Rpl30	1.44364e-164	-0.382247	1	1	2.4627e-160
Fer1l6	3.6372e-164	-0.612064	0.032	0.482	6.2047e-160
Thop1	6.51133e-164	-0.584665	0.356	0.775	1.11077e-159
Akr1c19	7.62272e-164	-0.565736	0.141	0.617	1.30036e-159
Man2a2	9.61453e-164	0.418891	0.413	0.045	1.64014e-159
Ptprf	9.69042e-164	0.713312	0.878	0.634	1.65309e-159
Foxp2	1.03283e-163	0.528152	0.422	0.052	1.7619e-159
Serpinb6b	1.15323e-163	0.791961	0.769	0.36	1.9673e-159
Tff3	4.35511e-163	-2.73717	0.125	0.566	7.42939e-159
Ebp	1.23666e-162	-0.55073	0.678	0.933	2.10961e-158
Gstk1	3.53897e-162	0.563789	0.516	0.116	6.03713e-158
Cd82	3.98267e-162	-0.561262	0.315	0.762	6.79403e-158
Gfpt1	4.37019e-162	-0.647521	0.588	0.88	7.45511e-158
Mgat4a	6.5491e-162	-0.582999	0.271	0.728	1.11721e-157
Tpm4	1.3627e-161	0.584474	0.968	0.806	2.32462e-157
Tox3	1.53752e-161	-0.583608	0.143	0.615	2.62286e-157
Plet1	1.56425e-161	-0.99283	0.423	0.799	2.66845e-157
Cyb5a	1.83544e-161	-0.594336	0.911	0.994	3.13108e-157
Hsp90ab1	5.04237e-161	0.36053	1	1	8.60177e-157
Tmsb4x	9.43333e-161	0.758865	0.999	1	1.60923e-156
Nfe2l2	1.70893e-160	0.795727	0.95	0.864	2.91526e-156
Bsg	2.7315e-160	0.585994	0.997	0.998	4.65966e-156
Atp8a1	6.33483e-160	0.768718	0.844	0.582	1.08066e-155
Cpm	2.38366e-159	1.07719	0.604	0.219	4.06628e-155
Ubb	2.65393e-159	0.417469	1	1	4.52733e-155
Entpd1	1.29488e-158	0.366194	0.311	0.005	2.20894e-154
Iqgap2	5.6154e-158	-0.627308	0.33	0.757	9.57931e-154
Gas6	8.48957e-158	-0.930013	0.387	0.784	1.44824e-153
Wdr45	2.38367e-157	0.706017	0.678	0.303	4.0663e-153
Sftpd	2.8841e-157	1.95706	0.872	0.85	4.91998e-153
Rasgef1a	3.81595e-157	0.38132	0.345	0.019	6.50963e-153
Mrpl32	4.59801e-157	0.705287	0.824	0.558	7.84374e-153
Slfn2	5.65758e-157	-0.740529	0.137	0.611	9.65127e-153
Pgs1	7.50676e-157	0.547695	0.728	0.333	1.28058e-152
Foxa1	2.39664e-156	-0.586054	0.341	0.758	4.08843e-152
Naxd	4.30223e-156	0.617581	0.872	0.582	7.33918e-152
Mlph	4.70439e-156	-0.616112	0.698	0.93	8.02523e-152
Phyh	8.99763e-156	-0.637596	0.259	0.688	1.53491e-151
Pde7a	9.47279e-156	0.450264	0.479	0.091	1.61596e-151
Zdhhc3	3.80611e-155	0.82925	0.843	0.613	6.49284e-151
Foxa3	8.27447e-155	-0.556005	0.133	0.587	1.41154e-150
Prdx4	5.13454e-154	0.845104	0.746	0.368	8.75902e-150
Plxna4	4.54033e-153	0.413979	0.405	0.049	7.74534e-149
Cyp2f2	5.48049e-153	0.652666	0.309	0.007	9.34918e-149
Vtcn1	1.78081e-152	-0.513621	0.044	0.478	3.03788e-148
Acadl	2.76955e-152	0.551111	0.921	0.748	4.72457e-148
Bcl2a1b	6.13282e-152	0.484644	0.318	0.012	1.0462e-147
Otop3	6.48992e-152	-0.628952	0.029	0.453	1.10712e-147
Foxa2	8.41415e-152	0.593788	0.601	0.197	1.43537e-147
Tmem8	9.89896e-152	-0.50334	0.118	0.565	1.68866e-147
Ugdh	1.80639e-151	-0.704209	0.355	0.771	3.08152e-147
Tmem243	4.20345e-151	0.539124	0.509	0.122	7.17067e-147
Frk	4.34872e-151	-0.560728	0.281	0.711	7.41847e-147
Nostrin	4.7424e-151	-0.473102	0.054	0.485	8.09006e-147
Vnn1	9.3881e-151	-0.964544	0.226	0.682	1.60152e-146
Pax9	1.38797e-150	-0.516572	0.078	0.524	2.36774e-146
Abca3	2.25243e-150	0.964152	0.712	0.382	3.84242e-146
Fut8	4.19007e-150	-0.573531	0.251	0.704	7.14783e-146
Malat1	6.9941e-150	0.784045	0.998	1	1.19312e-145
Bend7	1.01831e-149	0.547491	0.566	0.169	1.73714e-145
Nfkbiz	1.91938e-149	-0.663258	0.353	0.778	3.27427e-145
Errfi1	2.96141e-149	0.833413	0.927	0.788	5.05188e-145
Myrf	3.17085e-149	-0.439605	0.052	0.482	5.40915e-145
Plekhh2	5.62233e-149	0.316242	0.3	0.006	9.59113e-145
Gjb3	8.85244e-149	0.452158	0.476	0.097	1.51014e-144
Lcn2	1.48986e-148	1.70725	0.339	0.024	2.54154e-144
Tmem30a	7.95391e-148	0.720856	0.85	0.624	1.35686e-143
Lyz2	1.36872e-147	2.73505	0.483	0.12	2.3349e-143
Cib1	4.49094e-147	-0.506378	0.748	0.953	7.66109e-143
Nab2	7.35728e-147	0.521457	0.507	0.125	1.25508e-142
Arhgap31	1.89944e-146	0.328422	0.314	0.013	3.24026e-142
Tmprss4	2.6524e-146	-0.578614	0.183	0.621	4.52472e-142
Vsig2	3.20592e-146	-0.69817	0.489	0.826	5.46897e-142
Anxa1	4.06439e-146	0.803735	0.988	0.976	6.93344e-142
Smim24	5.64572e-146	-0.53567	0.03	0.441	9.63104e-142
Mmp15	8.24774e-146	-0.574697	0.423	0.817	1.40698e-141
Ptprm	1.49064e-145	0.321631	0.299	0.008	2.54289e-141
2310007B03Rik	1.83098e-145	0.423753	0.339	0.025	3.12348e-141
Msln	3.49978e-145	-0.871396	0.429	0.833	5.97027e-141
Bex4	3.53273e-145	0.470689	0.323	0.017	6.02648e-141
Dapk1	4.27455e-145	0.488808	0.48	0.106	7.29195e-141
Hgfac	6.08648e-144	-0.562645	0.183	0.625	1.03829e-139
Atp8b1	8.18629e-144	-0.510665	0.247	0.68	1.3965e-139
Sulf2	1.93395e-143	-0.474091	0.066	0.489	3.29912e-139
Ndfip1	2.79523e-143	0.525408	0.908	0.648	4.76839e-139
Mrps24	5.17485e-143	-0.441247	0.908	0.978	8.82778e-139
Anxa6	2.24385e-142	0.319347	0.306	0.013	3.82778e-138
Pdcd4	4.399e-142	-0.563569	0.126	0.554	7.50426e-138
Ldha	8.06438e-142	0.612412	0.996	0.985	1.3757e-137
Itgb4	1.80012e-141	-0.516567	0.286	0.741	3.07083e-137
Sox9	3.01209e-141	-0.761639	0.117	0.543	5.13833e-137
Tshz2	1.05635e-140	-0.571505	0.328	0.729	1.80202e-136
Cystm1	1.72006e-140	-0.386951	0.998	1	2.93425e-136
Cyp2s1	2.59457e-140	-0.606687	0.133	0.569	4.42608e-136
Prss32	4.46982e-140	-0.627547	0.021	0.416	7.62507e-136
Tmem63a	5.1407e-140	-0.524256	0.279	0.692	8.76952e-136
Itpr1	1.07658e-139	0.359049	0.36	0.039	1.83654e-135
Slc6a14	1.54404e-139	0.375111	0.305	0.015	2.63397e-135
Vegfa	1.8841e-139	0.520601	0.575	0.181	3.21409e-135
Gpr55	1.93463e-139	-0.46236	0.022	0.417	3.30029e-135
Scn1b	2.48144e-139	0.41544	0.419	0.071	4.23308e-135
Epb41l4b	3.40995e-139	-0.536576	0.346	0.743	5.81704e-135
Rab34	5.60606e-139	0.319703	0.335	0.027	9.56337e-135
Tceal8	5.98024e-139	0.479617	0.51	0.133	1.02017e-134
Adam28	4.85332e-138	-0.39888	0.037	0.441	8.27928e-134
Arg2	9.7617e-138	0.391601	0.301	0.014	1.66525e-133
Il4ra	5.24047e-137	0.636954	0.742	0.408	8.93972e-133
Hsd17b10	3.11349e-136	0.700111	0.917	0.757	5.3113e-132
Lgals2	3.18367e-136	-0.865025	0.02	0.408	5.43103e-132
Me1	4.71349e-136	-0.467032	0.857	0.975	8.04074e-132
Akap5	5.63549e-136	0.542411	0.291	0.012	9.61358e-132
Paqr5	6.8945e-136	-0.517206	0.334	0.74	1.17613e-131
Maob	7.81233e-136	0.391118	0.337	0.032	1.3327e-131
Myl12a	5.8612e-135	0.491447	0.988	0.927	9.99863e-131
Pmp22	6.69549e-135	0.371179	0.285	0.01	1.14218e-130
Spint2	1.12891e-134	-0.372459	0.999	1	1.92581e-130
Nrp1	2.53441e-134	0.565884	0.434	0.091	4.32346e-130
Ssx2ip	3.05601e-134	0.402717	0.433	0.084	5.21324e-130
Hspa8	4.54901e-134	0.377062	0.999	1	7.76015e-130
Mfap3l	5.19774e-134	0.281583	0.265	0.003	8.86683e-130
Kctd1	1.09547e-133	0.346793	0.329	0.029	1.86877e-129
Klf3	1.85346e-133	-0.625381	0.68	0.901	3.16181e-129
Slco4c1	4.05841e-133	0.348192	0.274	0.007	6.92324e-129
B2m	4.30843e-133	-0.647026	0.666	0.93	7.34975e-129
Grtp1	5.4548e-133	-0.433881	0.093	0.502	9.30534e-129
Wnt7a	1.6366e-132	0.336959	0.334	0.031	2.79188e-128
Ccnd1	5.13345e-132	0.639894	0.968	0.858	8.75715e-128
Tbc1d8	6.06149e-132	0.319423	0.319	0.026	1.03403e-127
Tspan15	7.83156e-132	-0.492936	0.465	0.821	1.33599e-127
Clic4	8.07118e-132	-0.604683	0.342	0.735	1.37686e-127
Nckap5	1.09814e-131	0.467148	0.429	0.084	1.87332e-127
Rassf2	1.63851e-131	0.289437	0.261	0.003	2.79514e-127
Kctd14	3.45103e-131	-0.675036	0.388	0.762	5.88711e-127
Kif13b	2.42257e-130	-0.550645	0.261	0.661	4.13266e-126
Thbs1	3.9404e-130	0.76406	0.573	0.191	6.72192e-126
Acss1	6.11873e-130	-0.455891	0.096	0.501	1.04379e-125
Gsta3	6.89546e-130	-0.970704	0.263	0.642	1.1763e-125
Lrp2	1.01335e-129	0.43996	0.264	0.006	1.72867e-125
Fads3	1.03142e-129	0.552346	0.69	0.335	1.75951e-125
Oaz2	1.34318e-129	0.461885	0.497	0.138	2.29133e-125
Cat	3.39285e-129	0.527443	0.498	0.142	5.78786e-125
Slc12a2	6.89999e-129	-0.679943	0.914	0.976	1.17707e-124
Hmox1	8.5624e-129	0.416555	0.431	0.086	1.46066e-124
Aox1	2.25466e-128	0.327777	0.289	0.016	3.84623e-124
Cysrt1	9.20606e-128	-0.601823	0.074	0.468	1.57046e-123
Dlc1	1.51932e-127	0.276355	0.255	0.004	2.59181e-123
Krt8	1.61106e-127	-0.385838	1	1	2.74832e-123
Mal	1.727e-127	-0.6593	0.951	0.987	2.94609e-123
Lima1	1.78587e-127	-0.477215	0.594	0.91	3.04651e-123
Trim2	2.21899e-127	-0.493628	0.149	0.554	3.78537e-123
Cd9	4.45816e-127	0.455474	0.998	0.998	7.60518e-123
Rnh1	1.63868e-126	0.500718	0.968	0.856	2.79542e-122
Ttc39a	2.07867e-126	-0.475958	0.227	0.632	3.546e-122
Rab3d	4.42528e-126	-0.503065	0.382	0.737	7.54909e-122
Osbpl9	5.1071e-126	0.494963	0.712	0.359	8.7122e-122
B4galnt1	9.15873e-126	-0.550018	0.588	0.838	1.56239e-121
Sult1d1	1.76922e-125	-0.622696	0.015	0.374	3.01811e-121
Pfdn1	3.88158e-125	0.448802	0.967	0.873	6.62158e-121
Nradd	5.40736e-125	0.36885	0.392	0.069	9.22441e-121
Trpm6	1.07089e-124	0.260505	0.251	0.004	1.82683e-120
Kdelr2	1.2593e-124	-0.46885	0.591	0.871	2.14824e-120
Lgals9	1.33315e-124	-0.53805	0.406	0.759	2.27422e-120
Il33	1.66055e-124	1.05534	0.532	0.184	2.83274e-120
Cd44	3.13152e-124	0.629264	0.71	0.339	5.34206e-120
Nenf	3.47937e-124	0.497747	0.719	0.375	5.93546e-120
Snhg18	4.60191e-124	0.281349	0.247	0.003	7.8504e-120
Tmprss2	8.81988e-124	-0.494304	0.34	0.72	1.50458e-119
Frat2	1.11818e-123	0.457591	0.443	0.102	1.90751e-119
Iqgap1	1.63682e-123	0.461347	0.984	0.946	2.79225e-119
Fmnl2	1.80249e-123	-0.42971	0.092	0.487	3.07486e-119
Sult1b1	2.52509e-123	-0.491177	0.016	0.373	4.30755e-119
Ptov1	1.68396e-122	0.499782	0.827	0.527	2.87267e-118
Smim14	2.72054e-122	-0.488187	0.703	0.92	4.64097e-118
Selenop	6.06503e-122	-0.71659	0.499	0.799	1.03463e-117
Limd2	6.93026e-122	0.468959	0.604	0.236	1.18223e-117
Eif4h	1.03894e-121	0.541862	0.965	0.872	1.77233e-117
Pir	1.22956e-121	-0.554336	0.451	0.793	2.0975e-117
B4galt6	2.72006e-121	-0.487707	0.429	0.783	4.64016e-117
Atp6v1g3	3.80579e-121	0.305729	0.245	0.004	6.4923e-117
Pnliprp2	1.27676e-120	-0.92534	0.033	0.394	2.17802e-116
Fmn1	1.69548e-120	-0.417614	0.066	0.44	2.89232e-116
Tpm1	4.86081e-120	0.456487	0.997	0.988	8.29205e-116
Snx25	4.96835e-120	0.314779	0.32	0.036	8.47551e-116
Epcam	1.15121e-119	-0.384502	0.992	1	1.96385e-115
Ihh	1.33518e-119	-0.467244	0.022	0.372	2.27769e-115
Tgm1	1.75933e-119	0.277519	0.242	0.004	3.00124e-115
Esam	1.80005e-119	0.354105	0.288	0.022	3.07071e-115
Cxadr	2.56239e-119	-0.56274	0.606	0.883	4.37118e-115
Mkrn2os	3.79107e-119	-0.403075	0.036	0.395	6.46718e-115
Tcf4	1.89676e-118	-0.467813	0.173	0.572	3.23568e-114
Shisa5	3.0171e-118	-0.492048	0.752	0.926	5.14687e-114
Dmkn	4.18241e-118	1.01638	0.288	0.024	7.13477e-114
Kmt5a	6.06525e-118	-0.434125	0.798	0.957	1.03467e-113
B3gnt3	6.56307e-118	-0.470283	0.308	0.687	1.11959e-113
Afp	6.89405e-118	0.4399	0.399	0.08	1.17606e-113
Ces1d	8.71716e-118	0.438843	0.322	0.039	1.48706e-113
Slc22a18	1.92824e-117	-0.447332	0.209	0.594	3.28939e-113
Rnf128	1.94056e-117	-0.468441	0.216	0.608	3.3104e-113
Ppif	2.83118e-117	-0.503589	0.127	0.502	4.82971e-113
Slc7a11	3.69093e-117	-0.494314	0.166	0.581	6.29636e-113
Elf5	4.73991e-117	0.287025	0.227	0	8.08581e-113
Chad	5.07671e-117	-0.668182	0.027	0.374	8.66036e-113
Mfsd4a	7.54416e-117	-0.446684	0.126	0.507	1.28696e-112
Kitl	9.45163e-117	-0.498708	0.117	0.506	1.61235e-112
Pgm2	1.1076e-116	-0.420014	0.208	0.604	1.88946e-112
Emc6	4.01243e-116	0.444152	0.948	0.808	6.84481e-112
Ahnak2	4.25672e-116	0.440168	0.421	0.096	7.26154e-112
Cdh1	8.91775e-116	-0.492383	0.909	0.977	1.52128e-111
Stbd1	1.43934e-115	0.251513	0.228	0.002	2.45537e-111
Dsg2	1.53571e-115	-0.461857	0.217	0.619	2.61977e-111
Galntl6	1.91577e-115	-0.379271	0.012	0.348	3.26811e-111
Cavin3	2.19036e-115	0.749698	0.641	0.322	3.73653e-111
2810459M11Rik	4.09057e-115	-0.368499	0.055	0.414	6.9781e-111
Gm15848	4.90725e-115	-0.590839	0.019	0.358	8.37127e-111
Tmem37	7.05108e-115	0.42902	0.304	0.033	1.20284e-110
Mafb	1.28657e-114	0.421146	0.225	0.001	2.19476e-110
Hmgn3	1.35745e-114	0.281983	0.287	0.024	2.31568e-110
Cald1	2.675e-114	0.645593	0.446	0.124	4.56328e-110
Sec14l4	6.37538e-114	0.256421	0.227	0.002	1.08758e-109
Itm2b	7.05055e-114	-0.47684	0.99	1	1.20275e-109
Cd38	7.09912e-114	-0.544322	0.197	0.583	1.21104e-109
Etnk1	1.00744e-113	-0.469568	0.35	0.706	1.71859e-109
Tjp2	1.66126e-113	-0.472122	0.724	0.912	2.83395e-109
Acsm3	1.71121e-113	-0.457448	0.015	0.348	2.91915e-109
Tmem30b	3.13732e-113	-0.443104	0.19	0.571	5.35195e-109
Clic5	3.60799e-113	0.743827	0.572	0.254	6.15486e-109
Sh3kbp1	4.63603e-113	-0.417139	0.035	0.378	7.90861e-109
Coro2a	7.31763e-113	-0.494201	0.214	0.586	1.24831e-108
Rab25	9.74023e-113	-0.372432	0.953	0.995	1.66159e-108
Dpep2	1.1591e-112	0.277122	0.254	0.013	1.9773e-108
Psma2	1.46717e-112	0.418256	0.975	0.912	2.50285e-108
Dhcr24	1.51039e-112	-0.470944	0.176	0.553	2.57658e-108
Ick	5.98909e-112	-0.441066	0.436	0.774	1.02168e-107
Kng2	6.32564e-112	0.530535	0.23	0.005	1.07909e-107
Tmc5	1.0069e-111	-0.386039	0.032	0.372	1.71767e-107
Comtd1	1.29087e-111	-0.415148	0.21	0.597	2.2021e-107
Rab12	1.69922e-111	0.43395	0.541	0.202	2.89869e-107
Ndufc2	2.19007e-111	0.484919	0.944	0.872	3.73604e-107
Eid1	2.37957e-111	0.351428	0.4	0.087	4.05931e-107
Rilpl2	6.26917e-111	-0.456278	0.308	0.683	1.06946e-106
tdTomato	1.13779e-110	0.412629	0.992	0.972	1.94095e-106
Ces2b	1.23357e-110	-0.438201	0.013	0.338	2.10435e-106
Scd2	1.44612e-110	0.628816	0.594	0.249	2.46693e-106
Tln1	1.82729e-110	0.457914	0.787	0.498	3.11718e-106
Rab38	2.9428e-110	0.300817	0.342	0.055	5.02013e-106
Slc44a2	4.87955e-110	0.515551	0.752	0.46	8.32403e-106
Trim3	7.89819e-110	0.354171	0.413	0.098	1.34735e-105
Col4a4	8.06442e-110	0.284823	0.222	0.003	1.37571e-105
Serpinb5	9.62863e-110	-0.397262	0.299	0.715	1.64255e-105
Nucb2	4.25151e-109	0.495218	0.645	0.296	7.25264e-105
Chd3	6.93292e-109	0.456787	0.682	0.344	1.18269e-104
Bambi	8.46059e-109	0.300696	0.232	0.007	1.44329e-104
Ephx2	1.1781e-108	-0.489915	0.117	0.486	2.00971e-104
Vstm5	1.36531e-108	-0.36634	0.064	0.414	2.32908e-104
Lrig3	1.54136e-108	-0.378434	0.064	0.416	2.62941e-104
Tfcp2l1	2.18558e-108	-0.480793	0.291	0.647	3.72837e-104
Serpinb9	3.79434e-108	0.629585	0.447	0.129	6.47277e-104
Ucp2	4.84994e-108	-0.543682	0.746	0.923	8.27352e-104
Sord	6.79483e-108	-0.42992	0.053	0.394	1.15913e-103
Mpp7	9.26089e-108	0.488363	0.568	0.238	1.57981e-103
Acaa2	1.10983e-107	0.691112	0.749	0.526	1.89326e-103
Itprid2	2.38442e-107	-0.442487	0.234	0.6	4.06759e-103
Cdk6	2.89004e-107	-0.446414	0.325	0.715	4.93012e-103
Tmem51	2.98588e-107	-0.402744	0.177	0.551	5.09362e-103
Scamp5	4.95023e-107	-0.384354	0.082	0.433	8.44459e-103
Gsn	6.88292e-107	0.7513	0.891	0.76	1.17416e-102
Tmco3	1.01245e-106	-0.409498	0.23	0.605	1.72714e-102
Spdef	1.25539e-106	-0.366009	0.025	0.349	2.14156e-102
Ambp	1.70326e-106	-1.2204	0.049	0.378	2.90559e-102
Tmem246	1.71919e-106	-0.418407	0.241	0.61	2.93276e-102
Arhgap12	2.37232e-106	-0.414614	0.232	0.604	4.04694e-102
Serinc2	4.22614e-106	-0.431893	0.479	0.795	7.20938e-102
Ccdc34	1.74358e-105	-0.563316	0.13	0.494	2.97438e-101
Slc12a4	2.32429e-105	0.28042	0.336	0.055	3.965e-101
Qsox1	4.25421e-105	-0.442399	0.418	0.754	7.25726e-101
Grasp	5.51504e-105	0.431414	0.541	0.205	9.4081e-101
Hhex	5.66861e-105	0.364781	0.325	0.053	9.67008e-101
Hid1	1.14759e-104	-0.408775	0.214	0.582	1.95768e-100
Ahr	1.4882e-104	0.478768	0.549	0.221	2.53871e-100
Cd81	2.10593e-104	0.531783	0.962	0.909	3.5925e-100
Orm1	2.1176e-104	0.273292	0.207	0.001	3.61242e-100
Mt1	2.76271e-104	1.46451	0.837	0.721	4.7129e-100
Celf2	4.17904e-104	0.353467	0.416	0.105	7.12903e-100
Sorbs2	5.75393e-104	-0.522265	0.2	0.566	9.81563e-100
Idh1	6.3374e-104	-0.441429	0.351	0.707	1.0811e-99
Hibadh	9.17214e-104	0.450311	0.704	0.399	1.56467e-99
Rida	1.17534e-103	-0.430313	0.229	0.59	2.00501e-99
Cdc42ep2	1.40964e-103	-0.399983	0.126	0.489	2.40471e-99
Exosc7	1.98074e-103	0.523896	0.816	0.588	3.37894e-99
Me2	2.1678e-103	-0.474293	0.154	0.506	3.69804e-99
Rtn4	2.1885e-103	0.659105	0.851	0.619	3.73337e-99
Rap1gap	3.21933e-103	-0.478438	0.57	0.844	5.49185e-99
Elovl1	3.46593e-103	0.893904	0.83	0.697	5.91253e-99
Acox1	3.85519e-103	-0.571049	0.454	0.742	6.57656e-99
Ptms	3.98099e-103	0.511637	0.934	0.905	6.79118e-99
Mapk3	4.10073e-103	-0.401269	0.87	0.974	6.99544e-99
Slc9a2	6.07307e-103	-0.389948	0.078	0.426	1.03601e-98
Rasl11a	6.07767e-103	0.350743	0.225	0.009	1.03679e-98
Appl2	6.67154e-103	-0.404309	0.187	0.547	1.1381e-98
Clic3	8.7483e-103	0.809105	0.591	0.299	1.49237e-98
Sh3gl2	1.25586e-102	-0.337805	0.041	0.365	2.14237e-98
Il1a	1.42384e-102	-0.760693	0.084	0.43	2.42892e-98
S100a6	2.0705e-102	-0.499476	0.994	1	3.53206e-98
Qk	6.98182e-102	0.529124	0.753	0.455	1.19103e-97
Golm1	7.78796e-102	-0.40761	0.876	0.977	1.32855e-97
Irf7	1.44263e-101	-0.630275	0.112	0.457	2.46098e-97
Il18r1	1.4805e-101	0.508851	0.66	0.367	2.52559e-97
Mtfr1l	2.20836e-101	0.455077	0.763	0.487	3.76724e-97
Etv5	1.20354e-100	0.310059	0.297	0.042	2.05311e-96
Tns4	2.00665e-100	-0.477253	0.219	0.627	3.42314e-96
Ptprh	3.13806e-100	-0.326814	0.022	0.329	5.35322e-96
Muc4	5.23621e-100	-0.577231	0.179	0.521	8.93244e-96
Slc45a3	2.97358e-99	-0.413612	0.197	0.55	5.07262e-95
Ube2e2	3.80839e-99	0.26599	0.314	0.051	6.49674e-95
Sh3yl1	4.33983e-99	-0.387585	0.233	0.59	7.40332e-95
Rnd3	6.51722e-99	-0.394639	0.101	0.448	1.11177e-94
Tpmt	7.38234e-99	-0.366375	0.106	0.452	1.25935e-94
Cfi	8.76034e-99	-0.794578	0.101	0.428	1.49443e-94
Paics	9.96171e-99	0.418452	0.835	0.547	1.69937e-94
Trp53inp2	9.96985e-99	0.53396	0.533	0.228	1.70076e-94
Vopp1	1.40809e-98	-0.357762	0.071	0.401	2.40206e-94
Plscr1	1.83065e-98	-0.482564	0.39	0.722	3.12291e-94
Dock11	2.20116e-98	-0.373102	0.116	0.471	3.75496e-94
Crim1	3.59976e-98	-0.378001	0.118	0.465	6.14083e-94
Mt2	4.57922e-98	0.950489	0.53	0.216	7.81169e-94
Map1lc3b	9.41194e-98	0.405778	0.991	0.942	1.60558e-93
Pls1	1.04291e-97	-0.423479	0.386	0.71	1.7791e-93
Pmm2	1.28339e-97	-0.401487	0.254	0.605	2.18933e-93
Atf5	1.31644e-97	0.519882	0.383	0.093	2.24571e-93
Slc39a8	1.55771e-97	0.276951	0.247	0.021	2.65729e-93
Atp10b	1.61937e-97	-0.342885	0.029	0.336	2.76249e-93
Tmem50b	2.83822e-97	0.383136	0.436	0.135	4.84172e-93
Zbtb7a	3.58058e-97	-0.41663	0.723	0.909	6.10811e-93
CT025671.1	5.33848e-97	-0.370496	0.028	0.33	9.10692e-93
Pear1	7.68416e-97	-0.340537	0.069	0.395	1.31084e-92
Cldn7	7.83273e-97	-0.342929	0.982	1	1.33619e-92
Arl3	8.09958e-97	0.347249	0.502	0.179	1.38171e-92
Gale	1.05224e-96	-0.448648	0.325	0.661	1.79502e-92
Fkbp1a	1.91982e-96	0.40926	0.98	0.916	3.27502e-92
Tstd1	2.24851e-96	-0.450712	0.032	0.339	3.83573e-92
Cblc	2.26316e-96	-0.425541	0.561	0.82	3.86072e-92
Spink4	2.28219e-96	-1.25465	0.068	0.38	3.89319e-92
Lmna	2.921e-96	0.481898	0.968	0.882	4.98293e-92
H2-DMa	3.71353e-96	0.281088	0.258	0.026	6.3349e-92
Rhpn2	4.03032e-96	-0.388394	0.181	0.535	6.87532e-92
Igsf9	9.3049e-96	-0.419719	0.31	0.684	1.58732e-91
Aldh1a7	1.15245e-95	0.273893	0.277	0.036	1.96596e-91
Tlnrd1	1.71672e-95	-0.38997	0.258	0.603	2.92855e-91
Kcne2	1.9529e-95	0.264384	0.196	0.003	3.33145e-91
C130074G19Rik	2.03467e-95	-0.398834	0.18	0.533	3.47095e-91
Akr1b7	2.89965e-95	-0.677805	0.022	0.317	4.94652e-91
Actr3	3.1899e-95	-0.345559	0.889	0.977	5.44165e-91
Mif	4.22362e-95	0.508552	0.949	0.816	7.20507e-91
Gramd2	4.65251e-95	0.277888	0.251	0.025	7.93671e-91
Tsc22d1	5.66505e-95	0.515299	0.958	0.88	9.66401e-91
Nav2	6.18148e-95	0.320176	0.324	0.061	1.0545e-90
Serpinb1a	8.3614e-95	-0.467564	0.022	0.317	1.42637e-90
Amotl1	1.52472e-94	0.255118	0.249	0.024	2.60102e-90
Drap1	1.53801e-94	0.401912	0.943	0.847	2.62368e-90
Samd9l	1.56729e-94	-0.442987	0.271	0.617	2.67365e-90
Mcu	1.7702e-94	-0.400436	0.377	0.706	3.01978e-90
Efemp2	4.54461e-94	0.275357	0.321	0.059	7.75266e-90
Pkp4	5.03518e-94	-0.419509	0.391	0.719	8.58951e-90
Chsy1	5.40537e-94	0.263635	0.281	0.039	9.22103e-90
Klf2	5.47505e-94	0.791111	0.504	0.195	9.3399e-90
Tmem42	1.64078e-93	0.357728	0.406	0.117	2.79901e-89
Mecom	1.65598e-93	-0.411919	0.591	0.84	2.82494e-89
Spg21	3.11499e-93	0.397989	0.69	0.392	5.31387e-89
Slc26a4	3.85144e-93	0.290236	0.194	0.004	6.57017e-89
Gnas	5.76453e-93	0.294309	0.998	0.997	9.83371e-89
Pof1b	6.65659e-93	-0.408417	0.227	0.568	1.13555e-88
Cmbl	7.2657e-93	-0.371905	0.155	0.503	1.23946e-88
Pthlh	2.2495e-92	0.423674	0.229	0.018	3.83742e-88
Zfp516	3.41627e-92	0.278159	0.333	0.068	5.82781e-88
Eif1	4.84651e-92	0.32377	1	1	8.26765e-88
Orai1	5.36359e-92	0.454328	0.789	0.54	9.14975e-88
Ptp4a3	5.68463e-92	0.35069	0.423	0.127	9.69741e-88
Tjp3	1.03166e-91	-0.406524	0.32	0.649	1.75991e-87
Cyp2c65	1.19247e-91	-0.305522	0.008	0.284	2.03423e-87
Paip2	3.00359e-91	0.379076	0.904	0.704	5.12382e-87
Ezr	3.12691e-91	-0.347695	0.955	0.998	5.3342e-87
Marcks	3.76182e-91	-0.45093	0.413	0.74	6.41729e-87
Rabac1	4.13174e-91	0.405939	0.965	0.916	7.04834e-87
Pak1	1.60384e-90	-0.378729	0.332	0.68	2.73599e-86
Trim35	2.18747e-90	0.314253	0.366	0.09	3.73161e-86
Epb41l2	2.83473e-90	-0.424788	0.264	0.601	4.83577e-86
Vldlr	8.57422e-90	-0.360515	0.066	0.373	1.46268e-85
Grk3	9.98035e-90	0.330566	0.407	0.118	1.70255e-85
Gamt	1.00415e-89	0.333535	0.331	0.071	1.71298e-85
Il34	1.22994e-89	0.254636	0.301	0.054	2.09815e-85
Mmp23	1.38272e-89	-0.353967	0.025	0.308	2.35878e-85
Chn2	1.42462e-89	-0.34324	0.106	0.433	2.43025e-85
Capn2	2.4969e-89	0.41926	0.74	0.459	4.25945e-85
Noct	3.02656e-89	0.330149	0.347	0.082	5.16302e-85
Wars	3.55867e-89	-0.426952	0.783	0.93	6.07073e-85
Galm	3.6526e-89	-0.309776	0.056	0.357	6.23098e-85
Rnpep	3.79517e-89	-0.389827	0.456	0.752	6.47419e-85
Pllp	4.5584e-89	-0.394807	0.436	0.741	7.77617e-85
Bok	5.9842e-89	-0.504134	0.483	0.788	1.02085e-84
Pon3	6.79147e-89	0.378752	0.5	0.199	1.15856e-84
Sub1	6.9923e-89	0.381314	0.968	0.911	1.19282e-84
Atp13a4	7.65606e-89	0.25821	0.248	0.029	1.30605e-84
Ltbp3	9.66362e-89	0.319385	0.445	0.144	1.64852e-84
Vamp5	2.13599e-88	-0.440578	0.574	0.819	3.64379e-84
Mettl7b	2.72371e-88	-0.370252	0.027	0.308	4.64637e-84
Fbp2	5.75004e-88	-0.34757	0.235	0.613	9.80899e-84
Chmp2b	6.40767e-88	-0.370832	0.707	0.89	1.09308e-83
C1galt1	6.51389e-88	-0.401116	0.331	0.649	1.1112e-83
Rictor	1.3092e-87	0.521383	0.653	0.381	2.23337e-83
Anp32a	1.38017e-87	0.396026	0.907	0.772	2.35443e-83
Cbx6	2.3187e-87	0.357803	0.458	0.158	3.95548e-83
Col18a1	2.45615e-87	-0.487885	0.168	0.492	4.18995e-83
Ybx1	2.6904e-87	-0.277594	1	1	4.58955e-83
Ano1	2.71182e-87	0.496028	0.781	0.559	4.62609e-83
F2r	3.47563e-87	0.394358	0.4	0.116	5.92908e-83
Pitpnm2	8.28695e-87	0.251432	0.27	0.04	1.41367e-82
Pls3	1.4348e-86	0.438825	0.87	0.661	2.44763e-82
Eva1b	1.70753e-86	0.362102	0.49	0.186	2.91287e-82
Cers2	2.69487e-86	0.390892	0.86	0.634	4.59718e-82
Gcc2	3.3729e-86	-0.425523	0.631	0.838	5.75382e-82
Lap3	4.95499e-86	0.401746	0.783	0.528	8.45271e-82
Gsr	5.59952e-86	-0.404525	0.736	0.919	9.55221e-82
Cebpb	8.51109e-86	0.516222	0.804	0.568	1.45191e-81
Cfap69	8.53024e-86	-0.294739	0.031	0.309	1.45517e-81
Cyp51	8.57198e-86	-0.482658	0.203	0.528	1.46229e-81
Selenof	2.49003e-85	0.35247	0.972	0.928	4.24775e-81
Epgn	4.4001e-85	0.329667	0.217	0.019	7.50613e-81
Itgav	4.91987e-85	0.408231	0.604	0.309	8.39281e-81
Klhdc2	5.57929e-85	0.384299	0.627	0.324	9.51771e-81
Smagp	6.15378e-85	-0.381247	0.713	0.89	1.04977e-80
Unc5b	7.37698e-85	-0.440494	0.183	0.519	1.25844e-80
Filip1l	9.45561e-85	-0.341942	0.106	0.424	1.61303e-80
Sqor	1.57292e-84	-0.377241	0.487	0.774	2.68324e-80
Polr1c	1.94478e-84	0.449888	0.732	0.5	3.3176e-80
Slc25a1	2.48327e-84	-0.394194	0.365	0.669	4.23621e-80
Anks4b	2.99595e-84	-0.274846	0.028	0.3	5.11079e-80
Abhd12	3.31469e-84	-0.417886	0.268	0.582	5.65452e-80
Nfil3	3.68321e-84	0.267225	0.295	0.056	6.2832e-80
Epha4	5.22376e-84	0.435498	0.491	0.197	8.91122e-80
Tmbim1	6.47731e-84	-0.393458	0.642	0.851	1.10496e-79
Prkar1a	1.78201e-83	0.3581	0.917	0.784	3.03994e-79
Ntf5	2.096e-83	0.251449	0.3	0.059	3.57557e-79
Gls	2.5137e-83	0.42945	0.674	0.396	4.28813e-79
1110008P14Rik	5.17112e-83	0.439874	0.812	0.582	8.82141e-79
Tacc1	6.29241e-83	0.268208	0.298	0.059	1.07342e-78
Rbms1	6.60862e-83	0.435247	0.866	0.672	1.12736e-78
Swt1	8.28892e-83	0.422038	0.643	0.368	1.41401e-78
Fxyd4	8.78423e-83	0.2534	0.198	0.013	1.4985e-78
Plpp2	1.22966e-82	-0.315158	0.921	0.986	2.09768e-78
Tuba1b	2.09993e-82	0.42115	0.844	0.582	3.58227e-78
Mtus1	3.34689e-82	-0.344006	0.159	0.481	5.70947e-78
Sh3bgrl3	4.93442e-82	-0.376306	0.941	0.979	8.41763e-78
Fkbp4	9.98477e-82	0.357502	0.961	0.884	1.7033e-77
Scara3	1.48561e-81	-0.411422	0.159	0.474	2.53431e-77
Rsu1	1.71486e-81	0.358823	0.513	0.217	2.92538e-77
Erbb3	2.0128e-81	-0.391213	0.555	0.802	3.43363e-77
S1pr2	2.57189e-81	0.251303	0.288	0.056	4.38739e-77
H2afj	2.94404e-81	0.392808	0.989	0.986	5.02223e-77
9130008F23Rik	3.61223e-81	-0.352482	0.219	0.553	6.16211e-77
Add3	3.99276e-81	-0.314583	0.079	0.373	6.81125e-77
Kcnq1	4.96766e-81	-0.332068	0.101	0.398	8.47433e-77
Dnase2a	5.01366e-81	0.41051	0.624	0.347	8.55279e-77
Slc25a51	5.52972e-81	0.384864	0.588	0.295	9.43315e-77
Gpx4	9.58423e-81	0.336013	1	0.997	1.63497e-76
Itpripl2	1.21687e-80	-0.363255	0.601	0.87	2.07585e-76
Gpd2	1.45558e-80	-0.387147	0.44	0.735	2.48308e-76
Trp53i11	2.09664e-80	-0.362002	0.21	0.528	3.57666e-76
Ift20	2.59696e-80	0.428592	0.868	0.711	4.43016e-76
Ttc9	2.80325e-80	0.387267	0.513	0.219	4.78207e-76
Tcim	5.45702e-80	-0.442358	0.16	0.487	9.30913e-76
Fam120a	6.8359e-80	-0.375679	0.537	0.779	1.16614e-75
Ech1	1.50544e-79	-0.361725	0.707	0.901	2.56812e-75
Mllt3	1.56642e-79	-0.388804	0.306	0.612	2.67216e-75
Mgat3	1.83448e-79	-0.353305	0.207	0.523	3.12943e-75
Fetub	2.24008e-79	0.313646	0.287	0.058	3.82135e-75
Enpp1	2.88132e-79	-0.300113	0.081	0.37	4.91524e-75
Pklr	2.97695e-79	-0.252602	0.02	0.274	5.07837e-75
Srd5a1	3.18547e-79	-0.376505	0.184	0.502	5.43409e-75
Yif1b	6.71857e-79	0.300168	0.392	0.124	1.14612e-74
Ubxn1	7.33194e-79	-0.30429	0.954	0.99	1.25076e-74
Inava	1.75702e-78	-0.356339	0.395	0.692	2.9973e-74
Dsp	2.63826e-78	-0.439841	0.574	0.808	4.5006e-74
Psme1	3.07481e-78	0.375719	0.926	0.791	5.24532e-74
Stub1	4.05172e-78	0.363116	0.926	0.787	6.91184e-74
Plekhb2	5.70958e-78	-0.411848	0.605	0.809	9.73997e-74
Rtkn	6.33078e-78	0.30336	0.406	0.136	1.07997e-73
Slc6a6	6.62025e-78	-0.362525	0.417	0.712	1.12935e-73
Slc26a2	7.53454e-78	-0.550346	0.671	0.836	1.28532e-73
Tubb2a	1.54228e-77	0.421605	0.424	0.155	2.63097e-73
Plekha7	2.74813e-77	-0.31688	0.153	0.462	4.68803e-73
Cdhr2	3.05672e-77	-0.360021	0.027	0.282	5.21446e-73
Rhoa	3.45134e-77	0.326242	0.998	0.989	5.88765e-73
Csnk1e	3.79045e-77	0.373524	0.668	0.39	6.46613e-73
Alcam	4.15538e-77	0.390961	0.964	0.923	7.08867e-73
Rnf11	4.68e-77	0.428896	0.816	0.629	7.98361e-73
Phlda3	6.73634e-77	0.616728	0.386	0.133	1.14915e-72
Azin1	8.55182e-77	0.584674	0.666	0.447	1.45886e-72
Tubb6	1.03411e-76	0.319653	0.256	0.043	1.76409e-72
Acss2	1.20237e-76	-0.318315	0.129	0.428	2.05112e-72
Rap1b	1.96631e-76	0.388528	0.85	0.676	3.35432e-72
Lamp2	2.18356e-76	0.358961	0.899	0.699	3.72494e-72
Tm4sf4	2.50604e-76	-0.86629	0.02	0.266	4.27505e-72
Trf	2.53059e-76	1.56727	0.441	0.176	4.31694e-72
Cox5a	6.01288e-76	-0.262357	0.998	0.999	1.02574e-71
Itgb1bp1	9.93106e-76	0.332552	0.463	0.191	1.69414e-71
Zfhx3	1.19801e-75	0.356655	0.598	0.303	2.04368e-71
Pmm1	1.50561e-75	-0.467197	0.365	0.648	2.56841e-71
Capn5	2.13025e-75	-0.441297	0.408	0.687	3.63399e-71
Tgoln1	2.77069e-75	0.584903	0.935	0.905	4.72653e-71
Zfp266	5.73451e-75	0.352641	0.525	0.248	9.7825e-71
Plekha6	6.5466e-75	-0.343533	0.264	0.573	1.11678e-70
Nme1	7.14001e-75	0.345395	0.977	0.862	1.21801e-70
Dap	1.25725e-74	-0.324186	0.753	0.917	2.14474e-70
Got1	1.41703e-74	-0.351536	0.382	0.686	2.41732e-70
Ptprs	1.67972e-74	0.318667	0.424	0.153	2.86543e-70
Zc2hc1a	1.74969e-74	0.276104	0.402	0.136	2.9848e-70
Wls	2.18892e-74	0.400179	0.73	0.476	3.73407e-70
Lasp1	5.07917e-74	-0.355055	0.901	0.962	8.66455e-70
Rpl22l1	5.53669e-74	0.343436	0.972	0.821	9.44504e-70
Pla2g4a	5.61747e-74	-0.358368	0.2	0.502	9.58285e-70
Exoc3l4	5.83388e-74	-0.353816	0.08	0.355	9.95202e-70
Pitpna	8.78946e-74	-0.33081	0.839	0.948	1.49939e-69
H6pd	1.19432e-73	0.276495	0.312	0.079	2.0374e-69
Il1rn	1.31261e-73	-0.48574	0.095	0.378	2.23918e-69
Anxa5	1.46185e-73	0.445681	0.989	0.964	2.49377e-69
Slc52a3	1.4777e-73	-0.254323	0.039	0.291	2.52081e-69
Rasgrf1	1.49332e-73	0.261984	0.302	0.071	2.54745e-69
Asap2	1.57621e-73	-0.343253	0.402	0.718	2.68886e-69
Aox3	1.66636e-73	0.281114	0.152	0.002	2.84264e-69
Erp44	1.91069e-73	-0.346352	0.591	0.809	3.25944e-69
Cgnl1	2.35683e-73	0.420466	0.699	0.458	4.02052e-69
Svil	2.41413e-73	0.356587	0.549	0.272	4.11827e-69
Misp	2.56082e-73	-0.350828	0.215	0.529	4.3685e-69
Zfp704	2.69293e-73	0.338666	0.43	0.162	4.59387e-69
Fam241a	2.85081e-73	-0.347874	0.314	0.613	4.8632e-69
Ctps	2.87038e-73	0.366183	0.507	0.228	4.89658e-69
Laptm4a	4.61743e-73	0.334349	0.975	0.927	7.87687e-69
Ckmt1	5.63668e-73	-0.368338	0.692	0.904	9.61562e-69
Steap2	5.73301e-73	-0.300725	0.097	0.377	9.77995e-69
Dgat2	6.77609e-73	-0.326768	0.076	0.349	1.15593e-68
Pdia6	8.74428e-73	0.518643	0.964	0.907	1.49169e-68
Snx18	1.21135e-72	0.312678	0.459	0.184	2.06645e-68
Tcf23	2.20521e-72	-0.251296	0.009	0.235	3.76187e-68
Fzd5	2.39536e-72	-0.352416	0.215	0.517	4.08624e-68
Irf2bpl	2.40655e-72	0.378892	0.551	0.272	4.10533e-68
Tspo	3.31128e-72	0.335883	0.997	0.997	5.64871e-68
Palmd	3.49897e-72	-0.294172	0.134	0.449	5.9689e-68
Cyba	5.67853e-72	-0.383065	0.825	0.935	9.68701e-68
Cldn2	6.03823e-72	-0.641231	0.217	0.495	1.03006e-67
Gm3776	8.1288e-72	-0.386076	0.037	0.288	1.38669e-67
Atp2a2	8.3303e-72	-0.333416	0.867	0.957	1.42107e-67
Hint1	1.38712e-71	-0.254877	0.998	1	2.36628e-67
Far1	1.61602e-71	-0.386515	0.803	0.94	2.75677e-67
Arfgap3	1.62127e-71	-0.327911	0.229	0.529	2.76572e-67
Isyna1	2.09574e-71	0.374707	0.561	0.291	3.57513e-67
Brd7	2.2398e-71	0.37206	0.624	0.362	3.82088e-67
Basp1	2.77814e-71	0.564738	0.254	0.047	4.73923e-67
Depp1	5.49182e-71	-0.652103	0.216	0.502	9.3685e-67
Mcl1	7.94998e-71	0.335008	0.966	0.887	1.35619e-66
Vps37b	1.06675e-70	-0.347724	0.321	0.622	1.81976e-66
Slc38a2	1.63636e-70	0.409434	0.924	0.838	2.79147e-66
Cybrd1	1.75983e-70	-0.419356	0.074	0.333	3.0021e-66
Ppp3ca	2.38545e-70	0.371903	0.779	0.554	4.06934e-66
Plpp3	2.80409e-70	-0.320882	0.086	0.356	4.78349e-66
Tspan3	2.98676e-70	-0.397562	0.378	0.642	5.09511e-66
Mal2	3.56984e-70	-0.420756	0.865	0.935	6.08978e-66
Kcnj15	3.6339e-70	0.343762	0.334	0.098	6.19907e-66
Mrfap1	4.72184e-70	0.296752	0.974	0.906	8.05498e-66
Gaa	5.14749e-70	0.302988	0.443	0.176	8.78111e-66
1110008L16Rik	5.49994e-70	-0.323776	0.089	0.356	9.38234e-66
Cebpd	6.7579e-70	0.547369	0.522	0.251	1.15283e-65
Ttr	6.95205e-70	-1.04099	0.11	0.369	1.18595e-65
Vps41	7.43589e-70	-0.369645	0.364	0.638	1.26849e-65
Tgfbr1	1.34642e-69	0.360092	0.465	0.201	2.29686e-65
Gal3st1	1.36908e-69	-0.324297	0.229	0.524	2.33552e-65
Ifit1bl1	2.11279e-69	-0.657479	0.031	0.266	3.60422e-65
Itgb1	2.16098e-69	0.33061	0.968	0.905	3.68642e-65
Pgam1	2.19732e-69	0.374453	0.912	0.76	3.7484e-65
Ydjc	4.47889e-69	-0.299819	0.163	0.46	7.64054e-65
D230025D16Rik	5.41099e-69	0.291022	0.399	0.144	9.23061e-65
Lactb	6.35011e-69	0.315007	0.434	0.178	1.08327e-64
Ier5	7.76966e-69	0.492273	0.753	0.532	1.32543e-64
Tacstd2	8.68439e-69	0.440767	0.766	0.538	1.48147e-64
Arhgap22	1.06811e-68	0.256607	0.352	0.109	1.82209e-64
Osgin1	1.60135e-68	0.346397	0.408	0.149	2.73175e-64
Tpcn1	1.66892e-68	-0.271685	0.092	0.358	2.84701e-64
Osmr	2.31181e-68	0.254151	0.268	0.059	3.94372e-64
Fam129b	2.52874e-68	0.362149	0.739	0.504	4.31378e-64
Mst1r	4.466e-68	-0.260187	0.074	0.333	7.61855e-64
Tnfrsf11b	4.49586e-68	-0.391235	0.115	0.403	7.66949e-64
Tubb5	7.06175e-68	0.400531	0.948	0.82	1.20466e-63
Fut2	8.05537e-68	-0.308811	0.187	0.478	1.37417e-63
Ssr4	1.12368e-67	-0.321849	0.976	0.992	1.91688e-63
Fam107b	1.21769e-67	0.581303	0.777	0.584	2.07726e-63
F3	1.59844e-67	0.706954	0.742	0.521	2.72678e-63
Acot1	1.68895e-67	0.253443	0.255	0.053	2.88117e-63
Plek2	1.70711e-67	-0.36394	0.418	0.69	2.91216e-63
Oaz1	1.76991e-67	0.258247	0.998	0.999	3.01929e-63
Cfl2	1.81736e-67	0.351077	0.629	0.369	3.10023e-63
Hbegf	3.35783e-67	0.501693	0.933	0.843	5.72811e-63
Cmtm8	3.54954e-67	0.443381	0.753	0.559	6.05516e-63
Apob	3.79331e-67	-0.390168	0.044	0.287	6.471e-63
Sat1	4.00528e-67	0.462827	0.936	0.852	6.83261e-63
Acsl1	4.33386e-67	-0.317764	0.125	0.396	7.39314e-63
Baiap2	4.39042e-67	0.359871	0.678	0.426	7.48961e-63
Top1	4.66585e-67	0.337379	0.941	0.864	7.95947e-63
Id2	5.26246e-67	-0.434984	0.543	0.806	8.97722e-63
Dpp4	6.59133e-67	0.290608	0.34	0.106	1.12441e-62
Anxa7	8.76141e-67	-0.329575	0.771	0.917	1.49461e-62
Atp5f1	1.10055e-66	0.264411	0.995	0.978	1.87743e-62
Pla2g16	2.64178e-66	-0.341695	0.378	0.646	4.50661e-62
Aldh3b1	3.22433e-66	0.259585	0.287	0.073	5.50038e-62
Homer2	3.61579e-66	-0.359838	0.212	0.5	6.16817e-62
Pigt	3.70181e-66	-0.318006	0.554	0.781	6.31492e-62
Cobl	3.91979e-66	0.257729	0.338	0.104	6.68677e-62
Hpgd	4.02754e-66	-0.260336	0.012	0.223	6.87058e-62
Asph	4.32274e-66	-0.38506	0.257	0.53	7.37417e-62
Stx8	6.62745e-66	0.353867	0.715	0.488	1.13058e-61
Tmem183a	7.00877e-66	-0.324492	0.641	0.827	1.19563e-61
Prss22	7.2042e-66	0.524176	0.577	0.321	1.22896e-61
Cdk2ap2	7.82362e-66	0.39888	0.878	0.727	1.33463e-61
Ces2a	9.24223e-66	-0.449399	0.008	0.216	1.57663e-61
Gpd1	1.79212e-65	-0.327022	0.264	0.544	3.05718e-61
Rnasel	3.89432e-65	-0.251971	0.055	0.298	6.64331e-61
Lamp1	3.96068e-65	0.305488	0.997	0.972	6.75653e-61
Fn1	4.01939e-65	0.842226	0.299	0.088	6.85668e-61
Tmem236	5.48672e-65	-0.262455	0.012	0.221	9.35979e-61
Prdx6	6.47895e-65	-0.419077	0.951	0.972	1.10524e-60
Cfb	8.10067e-65	-0.260137	0.061	0.305	1.38189e-60
Smpdl3a	9.53079e-65	-0.362024	0.319	0.596	1.62586e-60
Lif	1.28711e-64	0.302738	0.241	0.048	2.19568e-60
Rab5if	1.31397e-64	0.322911	0.943	0.854	2.2415e-60
Ifnar2	2.24912e-64	0.251154	0.379	0.135	3.83677e-60
Spats2	2.67792e-64	0.280856	0.362	0.125	4.56826e-60
Tusc3	2.78968e-64	0.329485	0.675	0.427	4.75891e-60
Hsp90b1	3.71018e-64	0.52121	0.994	0.987	6.3292e-60
Cuta	4.29067e-64	0.343979	0.874	0.731	7.31945e-60
Tmem208	5.6244e-64	0.303253	0.924	0.83	9.59467e-60
4930461G14Rik	6.96951e-64	-0.305909	0.044	0.277	1.18893e-59
Noxo1	7.15025e-64	-0.354481	0.152	0.42	1.21976e-59
Chia1	7.79123e-64	0.313117	0.133	0.002	1.32911e-59
Tuba1a	9.86258e-64	0.322043	0.268	0.065	1.68246e-59
Rac3	1.39833e-63	0.266344	0.295	0.082	2.38541e-59
Prkacb	1.84467e-63	0.293983	0.466	0.209	3.14682e-59
Mbip	3.35891e-63	0.377149	0.679	0.451	5.72996e-59
Eif4ebp2	3.47383e-63	-0.334123	0.423	0.669	5.926e-59
Bnip2	3.92168e-63	0.307062	0.54	0.277	6.68999e-59
Tff2	1.05394e-62	-2.36191	0.218	0.464	1.79792e-58
Hmgcs1	1.10664e-62	-0.464407	0.395	0.632	1.88782e-58
Vapa	1.32701e-62	0.288482	0.972	0.938	2.26374e-58
Tgfbr2	1.60289e-62	0.373143	0.729	0.506	2.73437e-58
Gabarapl1	1.73057e-62	0.307007	0.487	0.23	2.95218e-58
Phgdh	1.83033e-62	0.657531	0.402	0.155	3.12236e-58
Ggct	1.85296e-62	0.363566	0.338	0.11	3.16097e-58
Bgn	2.61254e-62	0.317416	0.18	0.021	4.45673e-58
AI661453	2.6152e-62	-0.32879	0.382	0.648	4.46127e-58
Nt5e	2.62772e-62	0.458116	0.52	0.273	4.48262e-58
Lcor	5.01677e-62	-0.312198	0.262	0.538	8.5581e-58
Mrps35	5.43541e-62	-0.326469	0.384	0.639	9.27227e-58
Farp1	7.86302e-62	0.26049	0.426	0.176	1.34135e-57
Dmbt1	1.9327e-61	-0.90688	0.03	0.242	3.29698e-57
Palld	1.98307e-61	-0.279565	0.13	0.396	3.38291e-57
Sfr1	2.72302e-61	0.340927	0.871	0.717	4.6452e-57
Usp33	3.17916e-61	0.296299	0.447	0.2	5.42332e-57
Retnla	4.19903e-61	2.28805	0.22	0.045	7.16312e-57
Clec2d	4.34553e-61	-0.252156	0.049	0.279	7.41303e-57
Lad1	4.79889e-61	-0.304023	0.423	0.696	8.18643e-57
Arl2	5.69597e-61	0.353319	0.659	0.429	9.71676e-57
Fndc3a	6.03226e-61	-0.349006	0.448	0.687	1.02904e-56
Arhgdig	6.08429e-61	0.253735	0.307	0.092	1.03792e-56
Efemp1	6.22335e-61	-0.373988	0.183	0.448	1.06164e-56
Adh7	8.28449e-61	-0.329988	0.01	0.206	1.41325e-56
Smpd1	9.12014e-61	0.313538	0.478	0.229	1.55581e-56
Xrn2	1.21348e-60	0.34571	0.768	0.554	2.07008e-56
Tns1	1.56843e-60	0.473402	0.592	0.372	2.67559e-56
Tra2a	1.58507e-60	0.351247	0.79	0.587	2.70397e-56
Rps19	1.71606e-60	0.255355	1	1	2.92743e-56
Tcf7l2	2.16566e-60	-0.316029	0.234	0.507	3.69441e-56
Selenow	2.82884e-60	0.325808	0.943	0.885	4.82572e-56
Odf2l	3.3858e-60	-0.333511	0.176	0.435	5.77583e-56
Carhsp1	1.47995e-59	-0.325656	0.462	0.708	2.52465e-55
Sppl2a	1.57038e-59	-0.317674	0.402	0.661	2.67891e-55
Tmem245	8.07506e-59	0.331966	0.584	0.341	1.37753e-54
Myo1e	1.49012e-58	0.34554	0.662	0.44	2.54199e-54
Btg2	1.78236e-58	-0.414935	0.89	0.965	3.04052e-54
Kcne3	2.10314e-58	-0.705711	0.047	0.259	3.58775e-54
Fasn	3.47419e-58	0.53792	0.597	0.4	5.92662e-54
D17Wsu92e	4.32559e-58	-0.31395	0.522	0.742	7.37902e-54
Sdsl	4.36785e-58	-0.264191	0.145	0.402	7.45111e-54
Ppp1r13b	5.40581e-58	-0.291829	0.239	0.507	9.22178e-54
Tead1	5.99847e-58	0.315178	0.47	0.23	1.02328e-53
Srpk2	7.30885e-58	0.312421	0.519	0.273	1.24682e-53
Pla2g4c	8.05255e-58	-0.356892	0.02	0.216	1.37368e-53
Fuca1	9.61967e-58	-0.312067	0.79	0.908	1.64102e-53
Uhrf1bp1l	1.35287e-57	0.320534	0.512	0.272	2.30786e-53
Wwp1	1.44422e-57	0.334862	0.483	0.245	2.46369e-53
Syngr1	1.90914e-57	-0.303589	0.186	0.448	3.2568e-53
Galk1	2.05971e-57	0.259741	0.403	0.167	3.51366e-53
Pik3ap1	2.13349e-57	-0.251657	0.024	0.222	3.63951e-53
Slmap	2.59698e-57	-0.321633	0.424	0.663	4.4302e-53
Scnn1a	2.84438e-57	0.319749	0.387	0.162	4.85223e-53
Cdkn1a	3.89525e-57	0.837493	0.754	0.571	6.64491e-53
Nexmif	4.91434e-57	-0.25801	0.117	0.37	8.38338e-53
Yae1d1	5.68507e-57	0.316353	0.597	0.362	9.69817e-53
Snx10	6.5145e-57	-0.268525	0.15	0.406	1.11131e-52
Dcxr	7.40685e-57	0.443623	0.525	0.304	1.26354e-52
Imp3	7.99451e-57	0.301544	0.919	0.857	1.36378e-52
Mrpl50	9.99592e-57	-0.311677	0.446	0.675	1.7052e-52
Cep250	1.09085e-56	-0.256102	0.109	0.352	1.86089e-52
Nr2f2	1.14361e-56	-0.277397	0.159	0.412	1.95089e-52
Ddah1	2.16992e-56	-0.284105	0.094	0.334	3.70166e-52
Scarb2	2.56804e-56	0.332089	0.591	0.36	4.38081e-52
Srebf2	2.76634e-56	-0.303311	0.359	0.62	4.71911e-52
Msi2	2.90854e-56	-0.344499	0.414	0.652	4.96168e-52
Plce1	3.03213e-56	-0.288826	0.172	0.433	5.17252e-52
Flnb	3.23704e-56	-0.370092	0.596	0.794	5.52207e-52
Klc4	3.29785e-56	-0.26806	0.283	0.555	5.62581e-52
Ubxn4	4.16835e-56	0.309429	0.88	0.755	7.1108e-52
Slc48a1	4.35423e-56	0.303343	0.475	0.232	7.42788e-52
Krt19	4.71803e-56	-0.331965	0.996	1	8.0485e-52
Sel1l3	4.91428e-56	-0.29402	0.255	0.518	8.38327e-52
Tnfrsf12a	5.008e-56	0.404816	0.934	0.847	8.54315e-52
Fdx1	5.1781e-56	0.443585	0.76	0.587	8.83331e-52
Mink1	6.2599e-56	-0.287423	0.296	0.562	1.06788e-51
Arhgap18	6.83159e-56	-0.27599	0.245	0.514	1.1654e-51
Atg2a	8.93925e-56	-0.266833	0.193	0.454	1.52495e-51
Efnb2	9.41117e-56	-0.285519	0.238	0.509	1.60545e-51
S100a13	1.04387e-55	-0.351988	0.928	0.956	1.78074e-51
Sema4a	1.19348e-55	-0.255811	0.17	0.427	2.03596e-51
Ube2s	1.47764e-55	0.256656	0.918	0.787	2.52071e-51
Pdia5	1.75585e-55	-0.27017	0.102	0.335	2.9953e-51
Cd14	1.88128e-55	-0.316174	0.528	0.784	3.20927e-51
Atp6v0d1	1.98243e-55	0.310433	0.648	0.426	3.38183e-51
Ppdpf	2.23709e-55	-0.269906	0.864	0.954	3.81626e-51
Slc16a2	4.54622e-55	0.271526	0.402	0.17	7.7554e-51
Pi4k2b	6.2893e-55	0.334635	0.767	0.578	1.07289e-50
Mpp6	7.48469e-55	0.309404	0.698	0.463	1.27681e-50
Ocln	8.23655e-55	-0.322007	0.418	0.667	1.40507e-50
Csgalnact2	1.08839e-54	0.278702	0.427	0.192	1.85668e-50
Trim25	2.18786e-54	-0.32969	0.38	0.621	3.73227e-50
Pparg	2.58136e-54	-0.275836	0.197	0.457	4.40354e-50
Acly	2.85533e-54	0.350775	0.67	0.466	4.8709e-50
Nebl	3.77365e-54	0.274362	0.305	0.104	6.43748e-50
St13	3.7918e-54	0.300532	0.941	0.838	6.46842e-50
Col15a1	3.79491e-54	0.253184	0.124	0.006	6.47374e-50
Pdxdc1	4.33288e-54	-0.286624	0.503	0.724	7.39146e-50
Plxna1	7.0651e-54	0.257226	0.354	0.138	1.20523e-49
Muc3	8.18039e-54	-0.664865	0.021	0.206	1.39549e-49
Tirap	8.58941e-54	-0.259421	0.19	0.446	1.46527e-49
Ptgr1	1.03092e-53	-0.33017	0.76	0.927	1.75865e-49
Creg1	1.20382e-53	0.352456	0.641	0.412	2.0536e-49
5330417C22Rik	1.22838e-53	-0.27633	0.049	0.256	2.0955e-49
Gsap	1.47043e-53	0.289	0.365	0.15	2.50841e-49
Dyrk2	2.53763e-53	-0.299322	0.291	0.546	4.32895e-49
Commd3	2.54172e-53	0.312369	0.742	0.542	4.33592e-49
Atp2c2	3.0041e-53	-0.263611	0.127	0.368	5.12469e-49
Hspa4l	3.03112e-53	0.332021	0.732	0.518	5.17079e-49
Rdm1	3.11847e-53	-0.329076	0.345	0.599	5.31979e-49
Meis2	3.1228e-53	-0.375743	0.042	0.24	5.32718e-49
Dst	3.39434e-53	-0.259521	0.251	0.529	5.7904e-49
Septin7	3.51583e-53	0.288987	0.882	0.756	5.99765e-49
Adgre5	4.06766e-53	-0.325562	0.252	0.512	6.93902e-49
Ddit4	6.41439e-53	0.342193	0.478	0.237	1.09423e-48
Sfxn1	8.29384e-53	0.303501	0.802	0.623	1.41485e-48
Rps27l	1.0587e-52	0.324673	0.985	0.985	1.80603e-48
Tnfsf9	1.17358e-52	0.318046	0.451	0.215	2.00201e-48
Irx1	1.53612e-52	0.378809	0.422	0.207	2.62047e-48
Epn3	1.63409e-52	-0.384905	0.586	0.753	2.7876e-48
Flrt3	2.30252e-52	0.28922	0.364	0.149	3.92788e-48
Flna	2.79361e-52	0.392645	0.793	0.616	4.76561e-48
Flot1	3.29384e-52	0.313762	0.505	0.276	5.61896e-48
Tax1bp1	3.84237e-52	-0.271658	0.923	0.965	6.55471e-48
Txnip	3.84299e-52	-0.405194	0.752	0.89	6.55575e-48
Mcpt1	3.95079e-52	-0.362825	0.014	0.19	6.73965e-48
Map1b	4.65334e-52	0.345197	0.262	0.078	7.93813e-48
Hspe1	4.94219e-52	0.254312	0.981	0.933	8.43088e-48
Gsdmd	5.22609e-52	-0.287328	0.425	0.677	8.91519e-48
Tmem139	5.38235e-52	0.251289	0.355	0.143	9.18174e-48
Pdha1	5.4824e-52	-0.303348	0.588	0.766	9.35243e-48
Bmp2	6.32031e-52	-0.373558	0.223	0.483	1.07818e-47
Clint1	8.02657e-52	-0.327539	0.606	0.784	1.36925e-47
Lamc2	8.55018e-52	0.334499	0.909	0.795	1.45857e-47
Ifngr1	8.85594e-52	-0.301032	0.51	0.738	1.51073e-47
Porcn	1.19147e-51	-0.292865	0.17	0.411	2.03253e-47
Dynlt3	1.47212e-51	0.2938	0.773	0.611	2.51129e-47
Elk3	1.67747e-51	0.256013	0.412	0.185	2.86159e-47
Cdc25a	1.99966e-51	-0.251078	0.163	0.407	3.41121e-47
St3gal6	3.15021e-51	-0.320033	0.127	0.352	5.37395e-47
Eml2	3.26144e-51	0.291038	0.553	0.324	5.56369e-47
Rab14	3.70168e-51	0.262269	0.965	0.907	6.31469e-47
Lims1	4.61988e-51	0.299921	0.524	0.292	7.88105e-47
Ccnt2	4.70401e-51	0.325126	0.644	0.431	8.02458e-47
Epop	7.13585e-51	-0.31373	0.238	0.488	1.21731e-46
Grina	9.08947e-51	0.29065	0.544	0.313	1.55057e-46
Mtss1	1.17455e-50	-0.287112	0.29	0.538	2.00366e-46
Pcdh1	1.31322e-50	-0.277926	0.326	0.578	2.24022e-46
Galnt3	1.41316e-50	-0.27822	0.441	0.682	2.41071e-46
Lcorl	1.48836e-50	-0.308228	0.249	0.49	2.539e-46
Marchf5	1.61905e-50	0.31794	0.71	0.498	2.76194e-46
Septin11	3.41281e-50	0.312975	0.54	0.316	5.82191e-46
Slc25a37	3.52638e-50	0.266924	0.435	0.21	6.01565e-46
Mxd4	5.60029e-50	0.32999	0.634	0.422	9.55353e-46
Ppl	7.41207e-50	0.285391	0.628	0.392	1.26442e-45
Bax	7.61923e-50	0.46359	0.856	0.772	1.29976e-45
S100g	1.11004e-49	0.453094	0.214	0.051	1.89362e-45
Gadd45g	1.90484e-49	0.316359	0.324	0.122	3.24946e-45
Zc3h12a	1.9158e-49	-0.260415	0.113	0.337	3.26817e-45
Sort1	2.29776e-49	-0.255379	0.174	0.411	3.91976e-45
Msmo1	2.71619e-49	-0.349341	0.372	0.593	4.63354e-45
Slc35a1	3.02148e-49	-0.266965	0.324	0.566	5.15435e-45
Pon2	3.06799e-49	0.281148	0.789	0.605	5.23369e-45
Crybg1	3.18064e-49	-0.275453	0.258	0.499	5.42586e-45
Ccdc186	3.39733e-49	0.286023	0.508	0.283	5.7955e-45
Samd8	3.59259e-49	-0.258715	0.153	0.384	6.12861e-45
Sipa1l3	3.98275e-49	-0.285729	0.337	0.577	6.79418e-45
Sqle	6.14265e-49	-0.34437	0.226	0.457	1.04787e-44
Fam20b	6.79951e-49	-0.268622	0.261	0.5	1.15993e-44
Fam91a1	6.91857e-49	-0.287703	0.448	0.664	1.18024e-44
Trpm4	7.78639e-49	-0.253309	0.234	0.48	1.32828e-44
Rbp2	8.05625e-49	-0.295821	0.022	0.195	1.37432e-44
Plaur	1.04554e-48	-0.338001	0.601	0.794	1.78359e-44
Lrg1	1.76881e-48	1.25425	0.29	0.108	3.01741e-44
Hsd17b11	1.90056e-48	-0.296064	0.662	0.827	3.24217e-44
Ivl	2.09489e-48	-0.909378	0.218	0.434	3.57368e-44
Slc44a1	2.86919e-48	-0.28211	0.346	0.577	4.89455e-44
Slc39a4	4.22769e-48	-0.340425	0.519	0.718	7.21202e-44
Krt7	4.42586e-48	0.384772	0.998	0.998	7.55007e-44
Dusp5	4.53449e-48	-0.42828	0.426	0.636	7.73538e-44
Slamf9	6.07082e-48	-0.250098	0.056	0.251	1.03562e-43
Tmc4	6.56728e-48	-0.267197	0.891	0.96	1.12031e-43
Trib1	7.01438e-48	0.331936	0.77	0.564	1.19658e-43
Net1	7.53272e-48	-0.289752	0.449	0.671	1.28501e-43
Slc35d1	1.18274e-47	-0.285456	0.369	0.609	2.01763e-43
Rpn1	1.29778e-47	-0.262172	0.814	0.918	2.21388e-43
Senp6	1.36726e-47	-0.259783	0.778	0.91	2.33241e-43
Prkcd	1.7258e-47	-0.27093	0.288	0.53	2.94405e-43
1810037I17Rik	2.14805e-47	-0.287901	0.924	0.961	3.66436e-43
Dlst	2.21336e-47	-0.28822	0.479	0.685	3.77577e-43
2610507B11Rik	3.00147e-47	-0.289145	0.505	0.704	5.1202e-43
Ube2b	3.2555e-47	0.273658	0.924	0.847	5.55356e-43
Bcap31	5.97437e-47	0.257069	0.948	0.891	1.01917e-42
mt-Nd5	8.01956e-47	-0.273276	0.959	0.987	1.36806e-42
Spred1	8.60181e-47	0.298736	0.633	0.43	1.46738e-42
Plat	9.38824e-47	-0.255561	0.206	0.466	1.60154e-42
Hmox2	1.05264e-46	0.282082	0.601	0.39	1.7957e-42
Oasl2	1.15864e-46	-0.297119	0.052	0.239	1.97653e-42
Tnfaip1	1.26823e-46	0.318649	0.738	0.579	2.16348e-42
Usp8	1.38592e-46	0.320175	0.553	0.355	2.36424e-42
Serinc1	1.66609e-46	0.2835	0.742	0.568	2.84218e-42
Dhrs3	2.72269e-46	0.332933	0.557	0.338	4.64464e-42
Anxa11	3.13357e-46	-0.279091	0.811	0.909	5.34557e-42
Fem1b	3.15978e-46	0.259827	0.482	0.266	5.39027e-42
Golph3l	3.80288e-46	-0.253522	0.248	0.483	6.48734e-42
Alad	5.131e-46	0.347845	0.668	0.497	8.75297e-42
Timm10b	5.45339e-46	0.286568	0.808	0.649	9.30294e-42
Ido1	1.17615e-45	-0.484025	0.022	0.185	2.0064e-41
Gm8797	1.27783e-45	0.26703	0.88	0.733	2.17985e-41
Arl1	1.34536e-45	0.271843	0.891	0.757	2.29505e-41
Ssbp4	1.6491e-45	0.286643	0.67	0.474	2.81321e-41
Slco3a1	2.10408e-45	0.284658	0.215	0.056	3.58935e-41
Nfat5	2.77901e-45	-0.312394	0.507	0.696	4.74072e-41
Tpp1	2.80154e-45	0.285513	0.679	0.479	4.77914e-41
Hif1a	3.37335e-45	0.299777	0.578	0.366	5.75459e-41
Ldlrap1	4.06864e-45	-0.262975	0.318	0.557	6.94069e-41
Slc25a5	4.10941e-45	-0.292056	0.98	0.991	7.01024e-41
Cct3	4.91215e-45	0.253031	0.947	0.851	8.37963e-41
Rnf217	7.63889e-45	-0.25214	0.194	0.421	1.30312e-40
Wnk1	8.31718e-45	0.287772	0.819	0.653	1.41883e-40
Gtf3a	8.98099e-45	0.274123	0.572	0.357	1.53207e-40
Ecm1	9.70089e-45	0.457304	0.601	0.377	1.65487e-40
Tnf	1.19803e-44	-0.276691	0.116	0.331	2.04372e-40
Cox17	1.53403e-44	-0.309771	0.652	0.796	2.6169e-40
Rhoc	1.56703e-44	-0.474867	0.53	0.698	2.67319e-40
Ece1	1.91503e-44	0.357245	0.665	0.485	3.26684e-40
Preb	2.54696e-44	-0.25288	0.289	0.519	4.34486e-40
Etv3	2.67567e-44	-0.307955	0.288	0.515	4.56443e-40
Ptbp3	7.41126e-44	-0.260394	0.713	0.865	1.26429e-39
Rock1	8.30233e-44	0.278225	0.913	0.834	1.41629e-39
Tmem109	1.19507e-43	0.278604	0.459	0.252	2.03868e-39
Tpm2	1.75947e-43	0.589221	0.591	0.405	3.00148e-39
Hnrnpul2	1.93919e-43	-0.271709	0.592	0.757	3.30806e-39
Arhgef2	2.21915e-43	0.271403	0.551	0.35	3.78564e-39
1700016C15Rik	3.11288e-43	-0.282007	0.056	0.238	5.31027e-39
Dnm2	3.12339e-43	-0.268246	0.551	0.738	5.32819e-39
Psmb8	3.2504e-43	0.258708	0.476	0.254	5.54486e-39
Pgrmc1	3.38623e-43	-0.253422	0.497	0.732	5.77657e-39
Gss	5.21975e-43	-0.256217	0.556	0.751	8.90437e-39
Hspa5	7.25062e-43	0.587262	0.985	0.977	1.23688e-38
Xbp1	7.41065e-43	-0.268665	0.559	0.75	1.26418e-38
Hcfc1r1	9.3904e-43	0.293008	0.721	0.536	1.60191e-38
Sox4	1.01873e-42	0.391162	0.82	0.622	1.73785e-38
Suclg2	1.02271e-42	-0.261806	0.312	0.531	1.74464e-38
Agpat3	1.02526e-42	0.253413	0.561	0.35	1.74899e-38
Zfp36l2	1.02531e-42	-0.343685	0.454	0.66	1.74907e-38
Ugcg	1.03176e-42	-0.256247	0.46	0.686	1.76008e-38
Cpeb4	1.17728e-42	0.308343	0.527	0.327	2.00832e-38
Adss	1.23143e-42	0.320088	0.863	0.771	2.1007e-38
Ryk	1.73421e-42	0.250791	0.613	0.404	2.95838e-38
Fbxo32	1.78371e-42	-0.27351	0.129	0.336	3.04284e-38
Slc2a1	2.58727e-42	-0.290296	0.419	0.637	4.41362e-38
Trappc4	3.00793e-42	0.277051	0.87	0.74	5.13123e-38
Tgm2	3.08032e-42	-0.328725	0.263	0.476	5.25472e-38
Kcnq1ot1	4.1984e-42	0.343834	0.666	0.442	7.16205e-38
Rasa2	4.99275e-42	-0.250019	0.359	0.59	8.51713e-38
Cacybp	5.87269e-42	0.264021	0.87	0.745	1.00182e-37
Cr1l	7.21246e-42	-0.259304	0.442	0.646	1.23037e-37
Cldn23	8.97549e-42	-0.266563	0.127	0.335	1.53113e-37
Etl4	9.07138e-42	-0.264023	0.338	0.554	1.54749e-37
Med8	1.59806e-41	0.257873	0.713	0.545	2.72613e-37
Psip1	1.61628e-41	0.252179	0.475	0.266	2.75722e-37
Myo5b	1.75619e-41	0.279127	0.502	0.301	2.99588e-37
Snx4	2.90289e-41	0.266397	0.579	0.384	4.95203e-37
Reep3	5.15789e-41	0.268415	0.85	0.71	8.79885e-37
Oat	5.20214e-41	0.350233	0.413	0.221	8.87433e-37
Fdps	7.59972e-41	-0.429813	0.523	0.673	1.29644e-36
Spag9	9.68819e-41	0.284129	0.594	0.396	1.65271e-36
Cldn4	1.47824e-40	0.505609	0.597	0.362	2.52173e-36
Pin1	1.56247e-40	0.25282	0.699	0.515	2.66542e-36
Mbd3	1.62478e-40	0.254035	0.752	0.565	2.77171e-36
4931406C07Rik	1.73268e-40	-0.252805	0.212	0.422	2.95577e-36
Ppp1cb	2.63572e-40	-0.261389	0.595	0.76	4.49628e-36
Cebpg	2.86639e-40	0.277219	0.755	0.608	4.88978e-36
Rap1a	3.55131e-40	0.263377	0.761	0.597	6.05818e-36
Eci1	5.07431e-40	0.263481	0.674	0.501	8.65626e-36
Zfp36	5.17007e-40	-0.395027	0.615	0.75	8.81962e-36
Pdia3	5.785e-40	0.330009	0.968	0.956	9.86864e-36
Ptpre	8.32422e-40	-0.250537	0.261	0.486	1.42003e-35
Atrx	1.1314e-39	0.270909	0.849	0.707	1.93006e-35
0610040J01Rik	1.1439e-39	-0.257826	0.343	0.557	1.95139e-35
Chp1	1.38793e-39	-0.260162	0.484	0.675	2.36767e-35
S100a11	1.55595e-39	0.262613	1	1	2.65429e-35
Arid4b	1.82319e-39	0.270618	0.722	0.541	3.11019e-35
Smim22	2.27206e-39	-0.267415	0.591	0.755	3.8759e-35
Cyb5b	2.80331e-39	-0.268393	0.536	0.708	4.78217e-35
Hs2st1	3.65067e-39	0.338034	0.425	0.236	6.22767e-35
Trappc6b	4.55145e-39	0.254465	0.721	0.556	7.76432e-35
Alas1	6.38351e-39	0.272513	0.485	0.287	1.08896e-34
Plxnb2	7.13306e-39	-0.250963	0.795	0.915	1.21683e-34
Nadk	1.01483e-38	-0.269659	0.574	0.741	1.7312e-34
Secisbp2l	1.17161e-38	0.290523	0.47	0.284	1.99866e-34
Gm26532	2.10836e-38	0.492819	0.717	0.58	3.59665e-34
Sdhd	2.14198e-38	-0.260249	0.575	0.733	3.65401e-34
Sec11c	2.57339e-38	-0.299034	0.726	0.86	4.38994e-34
S100a16	9.79744e-38	0.418308	0.931	0.887	1.67135e-33
Rhob	1.06041e-37	0.321667	0.465	0.267	1.80895e-33
Hspa1a	1.40284e-37	0.493839	0.891	0.87	2.39311e-33
Resf1	1.70554e-37	0.291239	0.637	0.441	2.90947e-33
Prrc2c	1.74708e-37	0.253163	0.947	0.863	2.98034e-33
Actn1	3.32235e-37	0.33883	0.843	0.772	5.66759e-33
Dusp1	3.51524e-37	0.348555	0.861	0.721	5.99666e-33
Ttc3	4.50404e-37	0.255999	0.63	0.435	7.68344e-33
Il10rb	6.88426e-37	0.285676	0.564	0.396	1.17439e-32
Stat3	9.12363e-37	0.251691	0.639	0.454	1.5564e-32
Nab1	1.37632e-36	0.252481	0.561	0.368	2.34787e-32
Higd1a	1.46495e-36	0.262739	0.874	0.794	2.49905e-32
Ywhah	1.5296e-36	0.295351	0.888	0.798	2.60934e-32
Ly6e	2.06863e-36	-0.293167	0.993	0.968	3.52887e-32
Ifitm3	2.08638e-36	0.318396	0.184	0.05	3.55916e-32
Mtch1	5.8321e-36	0.250421	0.87	0.775	9.94898e-32
Nbl1	6.61112e-36	-0.325911	0.47	0.657	1.12779e-31
Fnbp1l	6.6523e-36	-0.2528	0.579	0.743	1.13482e-31
Ldlr	1.12874e-35	-0.261025	0.241	0.447	1.92551e-31
Magi3	1.59786e-35	0.321542	0.489	0.318	2.72579e-31
Gpx2	3.05277e-35	-0.75363	0.338	0.496	5.20772e-31
Wwtr1	4.87523e-35	0.261449	0.502	0.314	8.31665e-31
Ly6g6c	6.54793e-35	0.330688	0.187	0.056	1.11701e-30
Cavin2	6.79497e-35	0.294226	0.237	0.089	1.15915e-30
Ndrg1	1.10914e-34	0.400156	0.343	0.168	1.89208e-30
Sdc4	2.19296e-34	0.260694	0.978	0.967	3.74098e-30
Ddit3	2.73794e-34	0.371915	0.36	0.186	4.67065e-30
Serinc3	1.53765e-33	0.250677	0.766	0.625	2.62308e-29
Rab9	3.05304e-33	0.254679	0.663	0.512	5.20818e-29
Krt79	7.31209e-33	0.64897	0.347	0.193	1.24737e-28
Nectin2	8.56638e-33	0.255958	0.894	0.838	1.46134e-28
Sgms1	2.15341e-32	0.334479	0.654	0.526	3.67351e-28
Gm19990	4.5459e-32	-0.282604	0.286	0.47	7.75486e-28
Bbx	4.61031e-32	0.261263	0.541	0.369	7.86474e-28
Hagh	7.56918e-32	0.259119	0.655	0.509	1.29123e-27
Dpp9	8.74794e-32	0.262321	0.476	0.312	1.49231e-27
Slc39a10	1.43161e-31	0.264009	0.485	0.308	2.44219e-27
Las1l	3.58436e-31	0.276631	0.665	0.519	6.11456e-27
Mthfd2	2.45704e-30	0.285416	0.264	0.116	4.19146e-26
Atp6v0a1	2.53216e-30	0.278022	0.649	0.523	4.3196e-26
Ypel3	3.54849e-30	0.251563	0.809	0.635	6.05337e-26
Samd5	1.14968e-29	0.28666	0.477	0.305	1.96124e-25
Epas1	1.40912e-29	0.280996	0.57	0.424	2.40382e-25
Ccz1	1.67237e-29	0.252171	0.67	0.538	2.8529e-25
Naxe	1.99076e-29	0.26439	0.792	0.689	3.39604e-25
Mcm6	2.12275e-29	-0.255435	0.188	0.362	3.6212e-25
Ffar4	4.21195e-29	0.28471	0.426	0.257	7.18516e-25
Grb14	4.37944e-29	0.272245	0.5	0.345	7.47089e-25
St3gal4	6.6956e-29	0.370609	0.709	0.592	1.1422e-24
Nupr1	1.22768e-28	0.870622	0.608	0.456	2.09429e-24
H2-T23	2.1241e-28	-0.253357	0.396	0.569	3.6235e-24
Idh2	4.59327e-28	0.257931	0.658	0.503	7.83566e-24
Cxcl5	4.6086e-28	-0.345628	0.167	0.337	7.86182e-24
Urah	8.54432e-28	0.254891	0.553	0.401	1.45758e-23
Phlda1	1.5389e-27	0.278764	0.992	0.994	2.62522e-23
Tnfaip2	2.20332e-27	-0.31874	0.138	0.298	3.75864e-23
Taok3	2.38853e-27	0.273113	0.834	0.77	4.07459e-23
Pam	4.06832e-27	0.280704	0.765	0.669	6.94015e-23
Sfn	1.17467e-26	0.564237	0.8	0.737	2.00387e-22
S100a14	1.23295e-25	0.386611	0.953	0.895	2.1033e-21
Ier3	1.83502e-25	0.411706	0.903	0.806	3.13036e-21
Tnip3	6.62628e-25	0.726589	0.326	0.195	1.13038e-20
2200002D01Rik	7.24478e-25	-0.274343	0.962	0.968	1.23589e-20
Ceacam1	8.25409e-25	-0.286057	0.726	0.851	1.40806e-20
Sprr1a	4.87311e-24	-0.64145	0.411	0.563	8.31304e-20
Gm26894	1.08275e-23	-0.294806	0.227	0.367	1.84707e-19
Scp2	3.91218e-23	0.269886	0.885	0.878	6.67379e-19
Liph	6.42359e-23	0.308049	0.6	0.522	1.0958e-18
C2cd4b	6.10766e-22	0.258684	0.274	0.143	1.04191e-17
Klf6	6.90005e-22	0.293396	0.916	0.886	1.17708e-17
Ccn1	1.0795e-21	0.253363	0.262	0.133	1.84152e-17
Csrp1	2.10065e-21	0.310496	0.742	0.694	3.5835e-17
Ccn2	7.1222e-21	-0.292881	0.112	0.241	1.21498e-16
Nipal1	2.55811e-20	0.258642	0.468	0.338	4.36389e-16
Tinagl1	3.03246e-20	0.295953	0.789	0.692	5.17308e-16
Dnajb1	5.88746e-19	0.302945	0.74	0.645	1.00434e-14
Pmvk	1.01582e-18	0.463805	0.56	0.464	1.73288e-14
Ccng1	1.12517e-18	0.33411	0.497	0.403	1.91943e-14
Cbr1	3.74121e-18	-0.252306	0.589	0.675	6.38213e-14
Id3	1.07325e-16	-0.262043	0.505	0.634	1.83085e-12
Tnfrsf23	6.15913e-15	0.458858	0.426	0.34	1.05069e-10
Pmepa1	1.56261e-13	0.270702	0.763	0.7	2.66566e-09
Cxcl3	6.95024e-13	0.278668	0.113	0.049	1.18564e-08
Hilpda	1.55515e-10	0.408455	0.391	0.303	2.65294e-06
Mki67	1.30504e-07	-0.304758	0.091	0.153	0.00222627
Cited2	7.97331e-07	0.261447	0.643	0.6	0.0136017
Aldh1a3	2.97017e-05	0.607896	0.25	0.206	0.506681
Hmgb2	0.000156678	-0.303936	0.342	0.397	1
Cxcl1	0.00041276	0.274221	0.231	0.185	1
Itga2	0.00207781	0.262822	0.542	0.701	1
Scgb1a1	0.0646001	0.755405	0.144	0.125	1
Ctsl	0.689655	0.544277	0.638	0.72	1

## Sheet: BPN control vs. BPN treated
	p_val	avg_logFC	pct.1	pct.2	p_val_adj
Gkn1	0	3.75832	0.898	0.488	0
Gkn2	0	3.46186	0.84	0.413	0
Tff1	0	2.73345	0.996	0.901	0
Gsta1	0	1.82189	0.979	0.777	0
S100a6	0	1.63313	1	0.999	0
Mucl3	0	1.49927	0.899	0.534	0
Anxa10	0	1.48758	0.968	0.686	0
S100a14	0	1.44839	0.895	0.404	0
Ces2c	0	1.40291	0.629	0.076	0
Phgr1	0	1.35159	0.943	0.606	0
Gcnt3	0	1.26304	0.937	0.365	0
Aldh1a1	0	1.23932	0.736	0.217	0
Ms4a8a	0	1.19008	0.804	0.118	0
S100a13	0	1.18066	0.956	0.619	0
St8sia6	0	1.04742	0.812	0.248	0
Ifi27l2b	0	1.02724	0.895	0.54	0
2200002D01Rik	0	1.02552	0.968	0.788	0
Anxa2	0	1.00531	0.997	0.959	0
Mal	0	0.952074	0.987	0.966	0
Mgst2	0	0.946526	0.966	0.786	0
Kif5c	0	0.939196	0.806	0.192	0
Hspa1b	0	0.938604	0.84	0.352	0
Cwh43	0	0.927592	0.875	0.402	0
Slc7a11	0	0.926912	0.581	0.027	0
Bcas1	0	0.923064	0.836	0.394	0
Fxyd5	0	0.914178	0.525	0.019	0
Capg	0	0.904018	0.968	0.782	0
Pkm	0	0.871495	0.998	0.956	0
Nt5c3	0	0.866894	0.841	0.385	0
Avil	0	0.863437	0.587	0.064	0
Tspan1	0	0.802398	0.992	0.88	0
Sh3bgrl3	0	0.755054	0.979	0.874	0
Gsta4	0	0.740246	0.999	1	0
Gapdh	0	0.734565	1	0.997	0
Mgst3	0	0.701501	0.987	0.916	0
Lgals4	0	0.634442	0.997	0.995	0
Rpl10	0	-0.442991	1	1	0
Ddx5	0	-0.570546	0.998	1	0
Srrm2	0	-0.586892	0.936	0.997	0
Actg1	0	-0.60567	1	1	0
Srsf5	0	-0.653715	0.822	0.976	0
Sdc4	0	-0.65462	0.967	0.999	0
Atp1b1	0	-0.691456	0.986	1	0
H3f3b	0	-0.70573	1	1	0
Ccnl1	0	-0.731323	0.677	0.942	0
Klf5	0	-0.74517	0.926	0.996	0
Tsc22d1	0	-0.786341	0.88	0.991	0
Hmgn1	0	-0.821105	0.672	0.975	0
Tceal9	0	-0.822697	0.437	0.895	0
Pnrc1	0	-0.825815	0.65	0.957	0
Rhob	0	-0.941249	0.267	0.786	0
Jund	0	-0.971452	0.992	1	0
Sftpd	0	-1.00138	0.85	0.997	0
Bicc1	0	-1.01722	0.38	0.872	0
Ier2	0	-1.05438	0.916	0.999	0
Pdzk1ip1	0	-1.05598	0.761	0.973	0
Junb	0	-1.06395	0.952	0.998	0
Icam1	0	-1.09153	0.106	0.677	0
Hbegf	0	-1.14254	0.843	0.986	0
Egr1	0	-1.15183	0.842	0.996	0
Gas6	0	-1.15294	0.784	0.991	0
Lurap1l	0	-1.18613	0.487	0.946	0
Fos	0	-1.19236	0.934	0.998	0
Tff2	0	-1.19493	0.464	0.985	0
Klf6	0	-1.2097	0.886	0.994	0
Sox4	0	-1.27279	0.622	0.982	0
Cfi	0	-1.29622	0.428	0.977	0
Ccn1	0	-1.30306	0.133	0.729	0
Jun	0	-1.40775	0.903	0.998	0
Thbs1	0	-1.42262	0.191	0.723	0
Fosb	0	-1.44609	0.61	0.963	0
Ttr	0	-1.5203	0.369	0.94	0
Atf3	0	-1.81006	0.741	0.995	0
Suox	7.5665e-305	0.727976	0.679	0.185	1.29077e-300
Ptma	4.30678e-301	-0.502629	0.999	1	7.34693e-297
Ivl	8.20618e-299	1.63614	0.434	0.005	1.39989e-294
Gde1	2.46922e-295	-0.727661	0.406	0.833	4.21224e-291
Sprr1a	5.58472e-295	2.13674	0.563	0.087	9.52697e-291
Lbp	1.13511e-293	-0.79171	0.394	0.881	1.93638e-289
Gsr	4.11691e-292	0.71648	0.919	0.611	7.02303e-288
Lrpap1	5.07567e-289	-0.739833	0.425	0.835	8.65858e-285
Tns4	1.00101e-286	0.782629	0.627	0.148	1.70762e-282
Galnt7	1.0392e-284	0.665323	0.973	0.858	1.77276e-280
Ugdh	1.05505e-284	0.84812	0.771	0.333	1.7998e-280
Cysrt1	1.30448e-283	0.682443	0.468	0.033	2.22531e-279
Scara3	3.10886e-282	-0.735575	0.474	0.859	5.30341e-278
Sdcbp2	1.47909e-280	0.777037	0.947	0.755	2.52317e-276
Rpl5	6.82813e-280	-0.45166	1	1	1.16481e-275
Tmem176b	2.13506e-278	-0.689761	0.674	0.984	3.6422e-274
Esd	2.60815e-275	0.822813	0.979	0.893	4.44924e-271
Abcc3	1.37777e-274	0.698888	0.925	0.688	2.35034e-270
Me1	4.28136e-274	0.578123	0.975	0.811	7.30358e-270
Clca1	7.37911e-274	2.65314	0.551	0.095	1.2588e-269
Crip2	2.43165e-273	-0.811628	0.459	0.875	4.14816e-269
Krt20	4.68304e-273	1.09442	0.788	0.363	7.9888e-269
Klf2	2.30602e-272	-1.13338	0.195	0.679	3.93384e-268
Fer1l6	2.41597e-272	0.600028	0.482	0.047	4.1214e-268
Bcam	7.00186e-272	-0.756002	0.41	0.82	1.19445e-267
Cd24a	3.63307e-271	-0.534482	0.982	1	6.19765e-267
Gm3336	4.2135e-270	0.793476	0.773	0.355	7.18781e-266
Cpm	1.08296e-269	-0.786583	0.219	0.688	1.84742e-265
Oasl1	2.51929e-269	0.805996	0.741	0.274	4.29766e-265
Fam213a	3.97461e-269	1.01956	0.964	0.889	6.78029e-265
Il1a	1.24378e-267	0.946541	0.43	0.022	2.12176e-263
Ptprr	9.00432e-266	0.545239	0.554	0.096	1.53605e-261
Hint1	1.26116e-265	0.436792	1	0.999	2.15141e-261
Slc26a2	5.3148e-264	0.850131	0.836	0.459	9.06652e-260
Wls	3.28434e-263	-0.618018	0.476	0.845	5.60275e-259
Idh2	2.55421e-262	-0.655248	0.503	0.863	4.35723e-258
Ldha	1.47478e-261	0.610731	0.985	0.901	2.51582e-257
Gch1	6.36892e-258	0.727403	0.74	0.315	1.08647e-253
AA467197	1.74388e-257	0.984791	0.904	0.667	2.97489e-253
Thop1	7.07485e-254	0.591599	0.775	0.338	1.2069e-249
Arl4c	3.42811e-250	-0.691288	0.115	0.572	5.84802e-246
Emp3	3.55677e-250	0.727904	0.561	0.119	6.0675e-246
Arid5b	1.62511e-248	-0.615908	0.62	0.89	2.77227e-244
Csrp1	9.67937e-248	-0.740274	0.694	0.912	1.6512e-243
Tspan2	1.3896e-247	0.654024	0.654	0.211	2.37051e-243
Mcpt2	3.70966e-246	1.50933	0.517	0.096	6.3283e-242
Psca	9.18549e-244	0.883992	0.998	0.997	1.56695e-239
Tspan8	1.33175e-243	0.386557	1	1	2.27183e-239
Plac8	2.55951e-243	0.69532	1	0.997	4.36627e-239
Got1	2.11284e-242	0.557297	0.686	0.244	3.6043e-238
Lasp1	3.27404e-240	0.578573	0.962	0.811	5.58518e-236
Pgc	1.39193e-235	-1.56354	0.063	0.5	2.3745e-231
Ctse	2.5139e-235	0.654396	0.986	0.955	4.28846e-231
Ubb	4.11201e-235	-0.36701	1	1	7.01468e-231
Mcl1	1.39213e-234	-0.541397	0.887	0.979	2.37484e-230
Aldoa	1.60145e-234	0.47405	1	0.984	2.73191e-230
Gm42418	2.73834e-234	-0.681306	1	1	4.67134e-230
Socs3	3.5048e-233	-1.10865	0.393	0.751	5.97883e-229
Padi2	5.74394e-233	0.453744	0.362	0.008	9.79859e-229
Nfkbia	1.72342e-232	-0.771869	0.621	0.91	2.93999e-228
Pcsk6	1.66477e-230	0.467266	0.431	0.045	2.83993e-226
Bri3	6.69887e-229	-0.467331	0.968	0.998	1.14276e-224
Atp5e	6.85459e-229	0.418065	0.997	0.991	1.16932e-224
Anxa3	1.31663e-228	0.485845	0.999	0.993	2.24603e-224
Mgst1	2.20201e-228	-0.631928	0.314	0.773	3.75641e-224
Sorbs2	1.05215e-226	-0.800213	0.566	0.874	1.79486e-222
Nr4a1	1.46525e-224	-0.794055	0.187	0.62	2.49958e-220
Tkt	4.25336e-224	0.5397	0.978	0.907	7.2558e-220
Pamr1	6.50903e-224	-0.664654	0.144	0.585	1.11038e-219
Edn1	2.32402e-222	-0.830921	0.041	0.448	3.96454e-218
Hspa8	1.58034e-219	0.38434	1	1	2.69591e-215
B3gnt3	1.62349e-219	0.524458	0.687	0.267	2.76951e-215
Eps8l3	4.86276e-219	0.706062	0.871	0.586	8.29538e-215
Pgd	1.83032e-218	0.550751	0.888	0.586	3.12235e-214
Pnliprp2	6.57043e-218	0.966179	0.394	0.035	1.12085e-213
Akr1c12	4.20389e-216	0.577685	0.717	0.303	7.17141e-212
Klf9	6.94188e-216	-0.646787	0.709	0.91	1.18422e-211
Sptssa	7.22171e-216	-0.581064	0.46	0.804	1.23195e-211
Lamc2	2.35132e-215	0.635087	0.795	0.443	4.01111e-211
Akr1c13	4.43694e-215	0.632201	0.827	0.47	7.56897e-211
Skil	2.53182e-214	-0.649523	0.397	0.759	4.31902e-210
Krt7	7.22512e-214	0.749272	0.998	0.993	1.23253e-209
Hgfac	9.54702e-213	0.552928	0.625	0.206	1.62863e-208
Zbtb20	5.95649e-212	-0.61975	0.545	0.858	1.01612e-207
Gjb1	5.52407e-207	0.692856	0.802	0.486	9.4235e-203
Wars	7.41425e-207	0.543801	0.93	0.722	1.2648e-202
Ppp1r15a	1.50398e-206	-0.628471	0.32	0.707	2.56564e-202
Fdps	1.64993e-206	0.744884	0.673	0.286	2.81462e-202
Ethe1	1.60954e-205	0.632917	0.824	0.517	2.74571e-201
Col18a1	1.65294e-205	0.583282	0.492	0.108	2.81975e-201
Nadk	7.65973e-204	0.529681	0.741	0.359	1.30667e-199
Gsto1	9.01078e-204	0.690718	1	1	1.53715e-199
Degs2	5.36253e-203	0.551966	0.882	0.631	9.14795e-199
Epop	7.94888e-202	0.548252	0.488	0.108	1.356e-197
Ybx1	9.18025e-202	0.346924	1	1	1.56606e-197
Alcam	8.98276e-201	-0.468625	0.923	0.992	1.53237e-196
App	1.06339e-200	-0.441921	0.924	0.989	1.81404e-196
Ripply3	2.12156e-199	0.610674	0.518	0.136	3.61917e-195
Kmt2e	1.0997e-198	-0.53208	0.643	0.89	1.87597e-194
Tcim	2.4025e-198	-0.727371	0.487	0.825	4.09842e-194
Btg2	1.24169e-195	-0.592725	0.965	0.992	2.1182e-191
Pigr	2.26183e-195	-0.655298	0.929	0.991	3.85846e-191
Cyp4b1	1.7419e-194	-0.716522	0.096	0.495	2.9715e-190
AY036118	6.06738e-193	-0.696964	0.628	0.899	1.03503e-188
Cnpy2	1.80765e-192	-0.42111	0.909	0.983	3.08366e-188
Pglyrp1	2.21416e-192	0.585272	0.981	0.949	3.77713e-188
Slc2a1	3.12302e-192	0.537072	0.637	0.248	5.32755e-188
Hspa1a	1.03089e-191	0.779715	0.87	0.584	1.75859e-187
Sbno2	3.88917e-191	-0.829753	0.449	0.752	6.63453e-187
Csrp2	2.02014e-190	-0.606447	0.624	0.927	3.44616e-186
Acp5	3.14021e-190	0.486321	0.839	0.482	5.35688e-186
Bag1	6.38578e-190	-0.328719	0.999	1	1.08935e-185
Fxyd3	6.84065e-190	0.3974	1	0.999	1.16695e-185
Spint2	1.50292e-189	0.36475	1	1	2.56383e-185
Nfib	3.70261e-189	-0.517276	0.702	0.907	6.31628e-185
Celf4	5.60682e-189	0.51672	0.647	0.257	9.56467e-185
Malat1	6.95308e-188	-0.422423	1	1	1.18613e-183
Prr13	4.32983e-187	0.479214	0.987	0.944	7.38626e-183
Pin4	6.39075e-186	0.492759	0.812	0.486	1.0902e-181
Camk2n1	1.78438e-185	-0.5648	0.697	0.925	3.04398e-181
Dusp1	2.06899e-185	-0.715559	0.721	0.963	3.5295e-181
Mfge8	2.94996e-184	-0.651503	0.499	0.804	5.03234e-180
Zfpm1	7.45688e-184	-0.537854	0.752	0.905	1.27207e-179
Mal2	1.49312e-183	0.592728	0.935	0.782	2.54711e-179
Pdgfa	7.34106e-183	-0.670251	0.314	0.674	1.25231e-178
Dusp8	4.13547e-182	-0.437195	0.064	0.431	7.0547e-178
Tns1	1.3348e-179	0.376078	0.372	0.046	2.27704e-175
Cmpk1	3.06262e-179	0.444762	0.934	0.725	5.22452e-175
H2afv	1.8581e-178	-0.473473	0.723	0.94	3.16974e-174
Cox7c	6.55606e-178	0.369715	0.996	0.979	1.1184e-173
Ly6a	9.24251e-177	1.48675	0.586	0.23	1.57668e-172
Msmo1	1.05912e-176	0.537356	0.593	0.218	1.80676e-172
Fosl2	3.09597e-176	-0.55518	0.387	0.721	5.28141e-172
Kcne3	3.09708e-176	-0.824422	0.259	0.667	5.28332e-172
Cox17	6.65955e-176	0.510933	0.796	0.465	1.13605e-171
Vstm5	7.19133e-176	0.360335	0.414	0.074	1.22677e-171
Tm4sf5	2.58558e-175	0.746942	0.608	0.242	4.41073e-171
1810037I17Rik	3.29483e-175	0.484174	0.961	0.852	5.62065e-171
Rbms3	4.65165e-175	-0.457924	0.094	0.461	7.93525e-171
Epn3	1.03901e-174	0.573946	0.753	0.426	1.77245e-170
Pfn1	1.48904e-174	0.333887	1	0.999	2.54015e-170
Gale	1.6414e-174	0.48845	0.661	0.289	2.80007e-170
Zfp644	2.6003e-174	-0.546233	0.438	0.752	4.43585e-170
Atf4	5.12171e-174	-0.479449	0.76	0.927	8.73713e-170
Sulf2	5.45796e-174	0.415616	0.489	0.129	9.31073e-170
Edf1	6.12752e-174	0.348969	0.996	0.992	1.04529e-169
5330417C22Rik	1.05267e-173	-0.600761	0.256	0.632	1.79575e-169
Hnrnpa0	1.32521e-173	-0.419408	0.89	0.976	2.26067e-169
Slfn2	2.03049e-173	0.654295	0.611	0.247	3.46381e-169
Fus	2.8789e-173	-0.480211	0.728	0.923	4.91111e-169
Fut8	5.38906e-173	0.4917	0.704	0.329	9.19319e-169
Serpinb6b	2.78304e-172	-0.722694	0.36	0.715	4.74759e-168
Klf13	6.29115e-172	-0.500404	0.452	0.77	1.07321e-167
Hs3st1	1.12631e-169	0.576456	0.815	0.528	1.92138e-165
4930461G14Rik	2.39944e-168	0.359245	0.277	0.008	4.09321e-164
Rdm1	5.29876e-168	0.49647	0.599	0.238	9.03916e-164
Chpt1	6.89506e-168	0.520872	0.932	0.814	1.17623e-163
Atxn7l3b	7.15583e-168	-0.421788	0.835	0.957	1.22071e-163
Akap9	1.92025e-167	-0.477689	0.791	0.931	3.27576e-163
Pik3ap1	7.11737e-167	-0.561432	0.222	0.589	1.21415e-162
Arhgap45	7.28545e-167	0.352251	0.366	0.052	1.24283e-162
Tpm2	9.67556e-167	0.495812	0.405	0.077	1.65055e-162
Prdx4	9.90067e-167	-0.506929	0.368	0.75	1.68895e-162
Gsn	6.28789e-166	0.581776	0.76	0.451	1.07265e-161
Tspan13	2.41358e-165	0.511525	0.937	0.765	4.11733e-161
Cyb5b	2.59018e-165	0.471979	0.708	0.366	4.41859e-161
Ost4	3.68168e-165	0.451333	0.816	0.515	6.28059e-161
Slco3a1	4.84815e-165	-0.525442	0.056	0.399	8.27046e-161
Cym	2.20629e-164	-2.42939	0.007	0.308	3.76372e-160
Prrc2c	6.17943e-164	-0.422599	0.863	0.967	1.05415e-159
Styk1	8.93822e-164	0.446664	0.643	0.279	1.52477e-159
Cyp3a13	1.27908e-163	1.04808	0.875	0.778	2.18199e-159
Duoxa2	1.31377e-163	1.0694	0.607	0.28	2.24117e-159
Cxadr	5.39213e-163	-0.443309	0.883	0.974	9.19844e-159
Cda	8.77987e-163	0.462506	0.474	0.132	1.49776e-158
Gadd45b	1.04491e-162	-0.852235	0.422	0.732	1.78251e-158
Plek2	8.0811e-162	0.507615	0.69	0.355	1.37855e-157
Irf7	2.68648e-161	0.617189	0.457	0.12	4.58287e-157
Ptprf	7.40457e-161	-0.462681	0.634	0.874	1.26315e-156
Slc44a4	9.57131e-161	0.454491	0.753	0.416	1.63277e-156
Capn5	1.0754e-160	0.540396	0.687	0.356	1.83453e-156
Mboat1	4.03305e-160	0.50176	0.788	0.483	6.87998e-156
Echdc2	5.54096e-160	-0.440697	0.176	0.541	9.45233e-156
Oit1	8.96725e-160	0.454752	0.969	0.869	1.52972e-155
Pgk1	1.74639e-159	0.467909	0.915	0.731	2.97917e-155
Rassf1	7.78826e-159	-0.529072	0.434	0.727	1.3286e-154
Card19	2.31945e-158	0.458742	0.782	0.462	3.95674e-154
Itpripl2	7.64721e-158	0.47235	0.87	0.611	1.30454e-153
Rack1	4.03662e-157	-0.315516	1	1	6.88607e-153
Srd5a1	4.36111e-157	0.440918	0.502	0.159	7.43962e-153
Cdc42ep1	7.44458e-157	-0.432562	0.184	0.545	1.26997e-152
H3f3a	1.06394e-156	-0.284676	1	1	1.81497e-152
Slc35d1	2.68414e-156	0.452174	0.609	0.259	4.57887e-152
Lgals3bp	3.21773e-156	0.52659	0.87	0.633	5.48913e-152
Zfp36l1	4.80186e-156	-0.526798	0.827	0.96	8.19149e-152
Ddah2	1.20497e-155	-0.456933	0.061	0.387	2.05556e-151
Atrx	1.29596e-155	-0.457462	0.707	0.901	2.21078e-151
Cxcl17	1.64296e-155	-0.451441	0.795	0.965	2.80273e-151
Parm1	1.91926e-154	0.540979	0.868	0.633	3.27406e-150
Samd5	2.88367e-154	0.348331	0.305	0.029	4.91926e-150
Rab11a	5.73395e-154	0.424382	0.922	0.748	9.78154e-150
Prss22	1.33632e-153	0.423166	0.321	0.038	2.27963e-149
Mbip	4.55288e-152	-0.505652	0.451	0.743	7.76676e-148
Errfi1	5.84974e-152	-0.596727	0.788	0.916	9.97908e-148
AW112010	6.18158e-152	1.15623	0.803	0.58	1.05452e-147
Eno1	6.75409e-152	0.457785	0.893	0.695	1.15218e-147
Resf1	1.25759e-151	-0.533099	0.441	0.744	2.14533e-147
Sqor	2.28323e-151	0.432651	0.774	0.459	3.89496e-147
Otop3	5.97959e-151	0.500437	0.453	0.125	1.02006e-146
9130008F23Rik	1.11244e-150	0.409006	0.553	0.204	1.8977e-146
Uqcc2	1.34815e-150	0.427268	0.858	0.601	2.29981e-146
AC100212.9	1.4467e-150	-0.516504	0.226	0.563	2.46793e-146
Fam3b	5.26363e-150	0.444627	0.726	0.387	8.97922e-146
Cldn18	8.25125e-150	0.510533	0.999	0.996	1.40758e-145
Gpr55	1.18131e-149	0.38106	0.417	0.099	2.0152e-145
Scd2	1.6241e-149	-0.49197	0.249	0.617	2.77055e-145
Zfp36	2.43132e-149	-0.540166	0.75	0.938	4.14759e-145
Tmem176a	6.44728e-149	-0.440493	0.701	0.959	1.09984e-144
Magi1	1.25144e-148	-0.492979	0.437	0.726	2.13483e-144
Atp6v0a1	8.90897e-148	0.416007	0.523	0.183	1.51978e-143
Cpd	3.00366e-147	0.468967	0.905	0.723	5.12394e-143
Actb	3.48028e-147	-0.298314	1	1	5.937e-143
Aplp2	1.20031e-146	-0.44271	0.869	0.968	2.0476e-142
Timp3	3.11939e-146	-0.732116	0.01	0.285	5.32137e-142
Foxp1	5.16323e-145	-0.426209	0.833	0.949	8.80796e-141
Spink4	1.86402e-144	-0.683335	0.38	0.755	3.17983e-140
Flnb	3.89923e-144	0.549727	0.794	0.542	6.6517e-140
Tcf23	5.09451e-144	0.25596	0.235	0.005	8.69073e-140
Lars2	1.0073e-143	-0.494918	0.626	0.874	1.71835e-139
Emp1	1.61071e-143	0.798326	0.798	0.585	2.7477e-139
Cyp51	2.21735e-143	0.504418	0.528	0.199	3.78257e-139
Akap13	6.23986e-143	-0.438595	0.726	0.904	1.06446e-138
Arpc2	8.54855e-143	0.294116	1	0.999	1.4583e-138
1700016C15Rik	8.69251e-143	0.3777	0.238	0.006	1.48286e-138
Chd6	5.81624e-142	-0.453358	0.345	0.665	9.92192e-138
Pgm2	7.6293e-142	0.372238	0.604	0.259	1.30148e-137
Stom	8.00022e-142	0.460793	0.429	0.121	1.36476e-137
Itgb6	1.73899e-141	-0.520925	0.396	0.695	2.96654e-137
Cox7a2	3.05111e-141	0.326819	0.992	0.961	5.2049e-137
Pls1	4.47884e-141	0.416185	0.71	0.384	7.64046e-137
Pycard	1.24511e-140	-0.453448	0.273	0.616	2.12403e-136
Gm3776	5.75979e-140	0.467798	0.288	0.031	9.82562e-136
Ces2b	7.99257e-140	0.389891	0.338	0.058	1.36345e-135
Hmgcs2	1.44899e-139	-0.399949	0.045	0.341	2.47182e-135
Luc7l2	5.8753e-139	-0.409712	0.789	0.929	1.00227e-134
Tmem147	8.34122e-139	-0.421031	0.666	0.869	1.42293e-134
Ripk3	1.61858e-138	0.288008	0.318	0.047	2.76113e-134
Laptm4a	4.1785e-138	-0.343739	0.927	0.984	7.12811e-134
Pdia3	4.90211e-138	-0.36371	0.956	0.994	8.36251e-134
Nedd4	9.53237e-138	-0.366716	0.942	0.991	1.62613e-133
Csrnp1	1.02064e-137	-0.374879	0.116	0.44	1.74111e-133
Nisch	1.45718e-137	-0.428547	0.522	0.774	2.4858e-133
Cystm1	7.52787e-137	0.301613	1	1	1.28418e-132
Fgfr3	3.44399e-136	-0.39072	0.073	0.379	5.87511e-132
Pgap1	7.0121e-136	0.444794	0.799	0.53	1.19619e-131
S100a4	8.77416e-136	0.295837	0.236	0.009	1.49678e-131
Ehd2	2.13589e-135	0.323067	0.414	0.107	3.64361e-131
Abhd12	6.25379e-135	0.42541	0.582	0.261	1.06683e-130
Clk1	8.41395e-135	-0.440028	0.567	0.807	1.43534e-130
Gpx4	1.3119e-134	0.433488	0.997	0.996	2.23797e-130
Rtn4	1.36546e-134	-0.40989	0.619	0.862	2.32934e-130
Bex3	1.54767e-134	-0.421772	0.223	0.565	2.64017e-130
Cdc42ep2	5.27262e-134	0.362472	0.489	0.166	8.99456e-130
Cmas	1.59379e-133	0.39278	0.792	0.502	2.71884e-129
Ldlrap1	2.33084e-133	0.373292	0.557	0.225	3.97618e-129
Rpl41	4.80389e-133	0.253132	1	1	8.19495e-129
Os9	6.29878e-133	-0.407073	0.716	0.885	1.07451e-128
Mmp14	7.52287e-133	-0.386697	0.159	0.485	1.28333e-128
Map3k1	1.21125e-132	-0.44253	0.289	0.602	2.06627e-128
Tfcp2l1	1.41965e-132	-0.476565	0.647	0.839	2.42178e-128
Pnisr	2.5574e-132	-0.419881	0.666	0.863	4.36268e-128
Tsc22d2	4.62013e-132	-0.503967	0.335	0.629	7.88147e-128
Cd38	1.12317e-131	0.500218	0.583	0.272	1.91602e-127
Rbm39	2.13219e-131	-0.327681	0.942	0.99	3.63731e-127
Atp5j2	2.97969e-131	0.323003	0.995	0.98	5.08306e-127
Nedd4l	3.40636e-131	-0.433668	0.441	0.734	5.81091e-127
Sqle	4.17925e-131	0.435767	0.457	0.153	7.12938e-127
Fkbp5	6.09081e-131	0.317557	0.356	0.076	1.03903e-126
Rpl23a	7.53273e-131	-0.269496	1	1	1.28501e-126
Pcbp2	2.64179e-130	-0.376263	0.834	0.941	4.50664e-126
Sult1a1	1.06582e-129	-0.486527	0.118	0.426	1.81818e-125
Pmm1	3.50038e-129	0.529521	0.648	0.353	5.9713e-125
Hipk2	5.07135e-129	-0.491445	0.258	0.565	8.65122e-125
Dynll1	5.38935e-129	0.294827	1	0.998	9.1937e-125
Pmaip1	8.96248e-129	-0.537959	0.363	0.652	1.52891e-124
Arid4b	2.24648e-128	-0.430307	0.541	0.788	3.83226e-124
Arhgef12	2.55542e-128	-0.44023	0.494	0.754	4.3593e-124
Uqcrq	4.86119e-128	0.356333	0.977	0.915	8.29271e-124
Cdhr2	1.18991e-127	0.360263	0.282	0.037	2.02986e-123
Rab14	1.28924e-127	-0.328167	0.907	0.974	2.19932e-123
Papss2	1.39204e-127	0.384951	0.53	0.216	2.37468e-123
Abca1	1.55775e-127	-0.28228	0.009	0.255	2.65737e-123
Trim35	1.67749e-127	-0.386237	0.09	0.388	2.86162e-123
Pitpna	2.40302e-127	0.365719	0.948	0.849	4.09931e-123
Creb3l2	3.21849e-127	-0.414312	0.17	0.483	5.49042e-123
Arpc5l	8.49887e-127	0.377204	0.887	0.678	1.44982e-122
Ecm1	8.9038e-127	0.791196	0.377	0.093	1.5189e-122
Abhd2	4.72644e-126	0.62121	0.689	0.436	8.06283e-122
Tra2a	5.55694e-126	-0.425291	0.587	0.808	9.47958e-122
Pir	9.60825e-126	0.472549	0.793	0.538	1.63907e-121
Zfp704	1.18217e-125	-0.381987	0.162	0.479	2.01666e-121
Tst	4.21492e-125	-0.419777	0.601	0.874	7.19024e-121
Abcc5	5.68223e-125	0.363811	0.433	0.137	9.69331e-121
Anxa7	1.1748e-124	0.394196	0.917	0.79	2.00409e-120
Selenop	2.59126e-124	-0.405038	0.799	0.96	4.42043e-120
Plet1	4.60623e-124	-0.448838	0.799	0.975	7.85776e-120
Cryab	7.74901e-124	-0.457743	0.047	0.317	1.3219e-119
Nfix	1.28419e-123	-0.442496	0.451	0.716	2.19069e-119
Tmem59	1.4512e-123	-0.314174	0.963	0.997	2.4756e-119
Duox2	1.6919e-123	0.615208	0.655	0.363	2.8862e-119
Unc5b	4.02738e-123	0.461714	0.519	0.217	6.87031e-119
Il1rn	1.2737e-122	0.539515	0.378	0.103	2.1728e-118
Atox1	1.65393e-122	0.355276	0.955	0.839	2.82144e-118
Ptov1	1.82313e-122	-0.38878	0.527	0.774	3.11008e-118
Tmem54	3.27857e-122	0.444016	0.877	0.698	5.59292e-118
Maged1	1.31383e-121	-0.361922	0.179	0.5	2.24125e-117
Ywhaq	1.45985e-121	-0.34311	0.965	0.993	2.49036e-117
tdTomato	3.82675e-121	-0.336379	0.972	0.993	6.52805e-117
AU021092	4.80556e-121	-0.40876	0.12	0.423	8.19781e-117
Tubb2b	1.56724e-120	-0.484823	0.067	0.34	2.67355e-116
Abca7	2.58676e-120	0.29779	0.381	0.101	4.41276e-116
Paics	4.01501e-120	-0.408311	0.547	0.788	6.84921e-116
Prdx2	4.87576e-120	-0.321184	0.974	0.994	8.31756e-116
Idi1	5.92991e-120	0.382506	0.391	0.11	1.01158e-115
Rep15	8.35352e-120	0.577051	0.513	0.219	1.42503e-115
Akr1b8	8.86771e-120	0.649517	0.797	0.594	1.51274e-115
Eid1	1.90211e-119	-0.33464	0.087	0.372	3.24481e-115
Eif5a	2.16953e-119	0.373592	0.999	0.986	3.70101e-115
Cyp2s1	2.22426e-119	-0.442468	0.569	0.819	3.79436e-115
Capzb	2.77621e-119	0.325099	0.974	0.885	4.73593e-115
Rflnb	2.8119e-119	0.411953	0.631	0.334	4.79682e-115
Ube2e3	5.27047e-119	-0.395185	0.578	0.807	8.9909e-115
Igfbp5	5.72122e-119	-0.530432	0.035	0.291	9.75983e-115
Mrpl33	7.76098e-119	0.369598	0.843	0.59	1.32395e-114
Gng5	9.17147e-119	0.267731	1	0.998	1.56456e-114
Tra2b	1.4549e-118	-0.385603	0.671	0.852	2.48192e-114
Zfp618	1.89649e-118	-0.375996	0.174	0.477	3.23522e-114
H2-T23	2.4996e-118	0.427854	0.569	0.267	4.26407e-114
Nfkbiz	2.77661e-118	-0.500271	0.778	0.915	4.73663e-114
Ihh	7.32124e-118	-0.475245	0.372	0.669	1.24893e-113
Kcnj15	1.43957e-117	-0.397872	0.098	0.385	2.45575e-113
Ppif	1.75426e-117	0.409272	0.502	0.208	2.99258e-113
Cap1	2.20934e-117	0.422199	0.806	0.582	3.76892e-113
Tmem8	6.56135e-117	0.353969	0.565	0.258	1.1193e-112
Zfhx3	6.8111e-117	-0.424225	0.303	0.602	1.1619e-112
Rfk	7.51826e-117	0.393889	0.883	0.71	1.28254e-112
Nupr1	1.17379e-116	0.711262	0.456	0.161	2.00237e-112
Gss	3.09987e-116	0.370809	0.751	0.46	5.28806e-112
Cox6c	3.59974e-116	0.287809	0.994	0.975	6.1408e-112
Gadd45g	8.1425e-116	-0.827341	0.122	0.403	1.38903e-111
Tpmt	1.04078e-115	0.320813	0.452	0.159	1.77546e-111
CT025671.1	1.44178e-115	0.319698	0.33	0.074	2.45953e-111
Ceacam1	1.97592e-115	0.568781	0.851	0.649	3.37072e-111
Marcksl1	2.07251e-115	-0.401382	0.215	0.525	3.53549e-111
Abcc4	3.18517e-115	0.418196	0.463	0.175	5.43358e-111
Ncor1	3.48294e-115	-0.343476	0.843	0.939	5.94154e-111
Smim14	4.94662e-115	0.393089	0.92	0.773	8.43844e-111
Chchd10	1.20738e-114	-0.373247	0.841	0.962	2.05967e-110
Rnf149	1.37103e-114	-0.365406	0.212	0.52	2.33884e-110
Phlda2	1.38778e-114	0.314985	0.416	0.131	2.36741e-110
Tacstd2	1.69522e-114	-0.491243	0.538	0.782	2.89187e-110
Mlph	3.65065e-114	0.41646	0.93	0.825	6.22765e-110
Ly6d	7.20323e-114	0.427733	0.993	0.967	1.2288e-109
Slc6a9	8.69573e-114	0.286575	0.35	0.086	1.4834e-109
Gstm1	1.54488e-113	-0.352676	0.852	0.98	2.6354e-109
Eif4a2	3.54927e-113	-0.362791	0.816	0.93	6.0547e-109
Areg	5.93683e-113	0.860789	0.583	0.32	1.01276e-108
Angptl4	1.5321e-112	0.474919	0.265	0.04	2.6136e-108
Fer1l4	5.81477e-112	0.358532	0.633	0.331	9.91941e-108
Hcfc1r1	9.66895e-112	-0.370226	0.536	0.792	1.64943e-107
Hmgcs1	1.17768e-111	0.497362	0.632	0.36	2.00901e-107
Itga2	1.6563e-111	0.454848	0.701	0.429	2.82548e-107
Bptf	1.79264e-111	-0.383953	0.657	0.839	3.05807e-107
Cebpd	2.25267e-111	-0.801355	0.251	0.531	3.84282e-107
Psapl1	2.55486e-110	0.272881	0.211	0.014	4.35834e-106
Ick	2.62698e-110	0.351224	0.774	0.5	4.48136e-106
Mbnl2	4.33649e-110	-0.36838	0.686	0.862	7.39761e-106
Serpinb5	5.80859e-110	0.392431	0.715	0.436	9.90887e-106
Syt8	2.75501e-109	0.386708	0.8	0.54	4.69978e-105
Rilpl2	4.42127e-109	0.368658	0.683	0.401	7.54224e-105
Bcar3	1.22414e-108	0.333122	0.476	0.189	2.08825e-104
Pbxip1	1.99741e-108	-0.408361	0.338	0.616	3.40739e-104
Cavin2	2.35886e-108	-0.364221	0.089	0.361	4.02398e-104
Hpcal1	2.37251e-108	0.374999	0.788	0.554	4.04727e-104
Pparg	3.84187e-108	0.322178	0.457	0.172	6.55385e-104
Tomm7	5.95922e-108	0.335934	0.925	0.763	1.01658e-103
Itm2c	8.70634e-108	-0.368104	0.595	0.822	1.48521e-103
B4galt6	1.09825e-107	0.377726	0.783	0.536	1.8735e-103
Ldlr	1.66175e-107	0.358501	0.447	0.161	2.83478e-103
Sema4b	2.98008e-107	0.383549	0.477	0.197	5.08373e-103
Ido1	3.06703e-107	0.584288	0.185	0.006	5.23204e-103
Cmtm8	7.49161e-107	-0.393662	0.559	0.798	1.27799e-102
Plk2	1.02844e-106	-0.46271	0.227	0.521	1.75441e-102
Sf3b2	3.18301e-106	-0.312102	0.895	0.961	5.42989e-102
Eif3a	3.73674e-106	-0.313617	0.912	0.975	6.37451e-102
Acaa2	3.9162e-106	-0.392753	0.526	0.759	6.68064e-102
Mxd1	1.21351e-105	0.564586	0.533	0.263	2.07012e-101
Trib1	1.44525e-105	-0.485391	0.564	0.776	2.46546e-101
Ddx39	1.68812e-105	0.402293	0.621	0.332	2.87976e-101
Rap1gap	2.50275e-105	0.38503	0.844	0.618	4.26944e-101
Irf1	3.1327e-105	-0.457277	0.249	0.532	5.34407e-101
Ahnak	4.32598e-105	-0.476861	0.908	0.974	7.37968e-101
Baiap2	1.32565e-104	-0.581934	0.426	0.649	2.26143e-100
Tuba4a	1.82957e-104	0.417654	0.857	0.696	3.12107e-100
Gm10076	1.93146e-104	0.360173	0.883	0.711	3.29488e-100
Rbpms	2.41148e-104	-0.404073	0.576	0.791	4.11375e-100
Ssbp3	3.41287e-104	-0.380409	0.432	0.684	5.82201e-100
Cdkn2b	5.83895e-104	0.375773	0.524	0.24	9.96066e-100
Etv4	6.55306e-104	0.276691	0.357	0.101	1.11789e-99
Plekhb2	8.12259e-104	0.390489	0.809	0.59	1.38563e-99
Hk1	1.16685e-103	0.331343	0.599	0.313	1.99053e-99
Adam9	1.59853e-103	0.286797	0.463	0.18	2.72692e-99
Fkbp4	3.04133e-103	-0.306911	0.884	0.971	5.18821e-99
Rbp2	1.05024e-102	-0.481368	0.195	0.484	1.7916e-98
Mgat4b	1.43837e-102	0.376124	0.721	0.454	2.45371e-98
Mcpt1	2.1514e-102	0.381872	0.19	0.011	3.67008e-98
Setd5	4.18421e-102	-0.412148	0.494	0.721	7.13784e-98
Brd1	7.6225e-102	-0.357615	0.584	0.785	1.30032e-97
Vsig1	8.39879e-102	0.449854	0.888	0.801	1.43275e-97
Mapk3	1.32904e-101	0.32158	0.974	0.91	2.2672e-97
Cdk4	1.34247e-101	-0.365595	0.6	0.808	2.29011e-97
Mrpl52	1.75141e-101	0.304056	0.947	0.851	2.98773e-97
Ttc3	2.00759e-101	-0.3874	0.435	0.688	3.42474e-97
Gm13056	5.09152e-101	0.278343	0.333	0.09	8.68562e-97
Map4k4	5.18748e-101	-0.375005	0.347	0.612	8.84933e-97
Ktn1	1.22493e-100	-0.377452	0.599	0.79	2.08961e-96
Arid5a	1.4137e-100	-0.384914	0.196	0.473	2.41164e-96
Shank2	2.94343e-100	-0.252598	0.055	0.295	5.0212e-96
Rnd3	3.18075e-100	-0.437595	0.448	0.683	5.42605e-96
Casp3	4.32291e-100	0.372581	0.578	0.303	7.37446e-96
Dsp	6.25206e-100	-0.384831	0.808	0.925	1.06654e-95
Cav2	7.47121e-100	0.314917	0.515	0.231	1.27451e-95
Cox5a	1.21347e-99	0.250446	0.999	0.997	2.07006e-95
Hprt	1.34413e-99	0.345082	0.772	0.519	2.29296e-95
Sertad1	1.61852e-99	-0.399318	0.435	0.675	2.76103e-95
Myadm	2.17847e-99	-0.398461	0.426	0.661	3.71625e-95
Nceh1	2.63621e-99	-0.34495	0.196	0.472	4.49712e-95
Slc22a18	2.92768e-99	0.326897	0.594	0.313	4.99433e-95
Ppp2r2b	3.20306e-99	-0.269747	0.006	0.202	5.46411e-95
Ralgps2	3.97071e-99	0.334031	0.693	0.41	6.77364e-95
Atp5k	6.03811e-99	0.32715	0.94	0.829	1.03004e-94
Ankrd11	1.05106e-98	-0.347072	0.776	0.905	1.793e-94
Anxa5	1.77318e-98	0.373865	0.964	0.922	3.02486e-94
Bcl2	1.82251e-98	-0.372818	0.291	0.564	3.10903e-94
Tppp3	2.57352e-98	-0.506926	0.058	0.3	4.39017e-94
Clmn	3.63135e-98	-0.404312	0.483	0.708	6.19472e-94
Cish	4.3869e-98	-0.301681	0.089	0.341	7.48361e-94
Gpd1	5.19259e-98	0.321669	0.544	0.264	8.85804e-94
2610037D02Rik	6.94933e-98	-0.333158	0.175	0.448	1.18549e-93
Arpc1b	2.47852e-97	0.257426	0.999	0.997	4.22811e-93
Cox7a2l	2.64827e-97	-0.257987	0.992	0.999	4.51768e-93
Dusp6	3.15935e-96	0.364254	0.54	0.263	5.38954e-92
Sema3e	3.83625e-96	0.384207	0.374	0.126	6.54425e-92
Ptprs	7.36443e-96	-0.320475	0.153	0.421	1.2563e-91
Sult1c2	9.91956e-96	-0.338786	0.875	0.976	1.69218e-91
Tgfb2	1.12709e-95	-0.264443	0.008	0.199	1.92271e-91
Hnrnpc	1.17115e-95	-0.308597	0.854	0.94	1.99786e-91
Atp2c2	1.1928e-95	0.278581	0.368	0.117	2.0348e-91
Kif12	1.21351e-95	-0.313982	0.115	0.373	2.07012e-91
Rbbp6	1.22524e-95	-0.370513	0.518	0.731	2.09014e-91
Emp2	1.56091e-95	-0.338936	0.812	0.938	2.66276e-91
Vasn	1.89712e-95	-0.269515	0.088	0.336	3.2363e-91
Purb	4.23826e-95	-0.30059	0.925	0.978	7.23004e-91
Dhcr24	5.6853e-95	0.350977	0.553	0.286	9.69856e-91
Ephx2	5.79091e-95	0.402276	0.486	0.229	9.87872e-91
Kctd14	6.76008e-95	-0.459178	0.762	0.902	1.1532e-90
Eppk1	7.02456e-95	-0.367767	0.146	0.403	1.19832e-90
Perp	8.04102e-95	0.316346	0.935	0.814	1.37172e-90
Ubc	1.1713e-94	-0.323963	0.996	1	1.99812e-90
Kifc3	1.41931e-94	-0.343401	0.208	0.477	2.4212e-90
Mylip	2.35039e-94	-0.277217	0.081	0.323	4.00953e-90
Gprc5c	2.7838e-94	-0.277533	0.116	0.373	4.74889e-90
Rras	3.56724e-94	0.428131	0.709	0.486	6.08536e-90
Hmgcr	6.06136e-94	0.349703	0.54	0.27	1.03401e-89
Tinagl1	1.10016e-93	0.424709	0.692	0.452	1.87677e-89
Rfx2	1.21271e-93	-0.268827	0.059	0.29	2.06876e-89
S100a1	1.58014e-93	0.320089	0.97	0.925	2.69555e-89
Atp1a1	2.53114e-93	-0.279601	0.986	0.997	4.31788e-89
Sec61g	3.40663e-93	0.345575	0.97	0.909	5.81136e-89
Nfil3	4.10418e-93	-0.256924	0.056	0.283	7.00131e-89
Ppib	4.15475e-93	-0.259762	0.993	0.999	7.08759e-89
Slc16a11	5.5111e-93	0.274865	0.312	0.084	9.40138e-89
Slc44a3	1.53857e-92	-0.365184	0.358	0.609	2.62465e-88
Stat3	2.77271e-92	-0.365484	0.454	0.683	4.72997e-88
Dap	4.24933e-92	0.312914	0.917	0.777	7.24893e-88
Phlda1	4.46388e-92	0.322521	0.994	0.978	7.61494e-88
Ifrd1	4.62063e-92	-0.439043	0.431	0.673	7.88233e-88
Creg1	4.75707e-92	-0.353825	0.412	0.665	8.11508e-88
Vegfa	8.34554e-92	-0.329868	0.181	0.449	1.42367e-87
Serpinb1a	1.27575e-91	-0.41487	0.317	0.591	2.1763e-87
Kmt2c	2.01787e-91	-0.378774	0.511	0.728	3.44229e-87
Pbrm1	2.05085e-91	-0.340604	0.688	0.836	3.49855e-87
Zfp292	2.6745e-91	-0.36976	0.525	0.726	4.56243e-87
Ubl4a	2.88087e-91	0.306993	0.635	0.358	4.91448e-87
Irf2bpl	4.24298e-91	-0.372357	0.272	0.53	7.23809e-87
Itga3	7.4973e-91	0.367261	0.591	0.333	1.27896e-86
Smpdl3a	7.65416e-91	-0.380309	0.596	0.784	1.30572e-86
Vasp	1.93478e-90	0.306751	0.899	0.732	3.30053e-86
Ano7	2.47348e-90	0.320959	0.481	0.221	4.21952e-86
Dnm2	2.59187e-90	0.321288	0.738	0.491	4.42148e-86
Slc23a3	4.4647e-90	0.28223	0.383	0.139	7.61634e-86
Clic1	5.92923e-90	0.254603	1	1	1.01147e-85
Filip1l	8.20796e-90	-0.408895	0.424	0.65	1.4002e-85
Scgb3a1	9.00915e-90	-0.38186	0.047	0.266	1.53687e-85
Hnrnpu	9.32117e-90	-0.301319	0.926	0.978	1.5901e-85
Galntl6	1.29088e-89	0.27755	0.348	0.113	2.2021e-85
Cp	2.70319e-89	-0.480146	0.032	0.234	4.61137e-85
Mat2a	2.76915e-89	-0.327197	0.858	0.942	4.7239e-85
Vgll4	2.93917e-89	-0.343928	0.39	0.64	5.01393e-85
Mt1	4.11391e-89	-0.505902	0.721	0.89	7.01792e-85
Myh9	4.93567e-89	-0.347753	0.78	0.9	8.41977e-85
Bclaf1	6.89275e-89	-0.34174	0.665	0.816	1.17583e-84
Prr15l	4.38267e-88	-0.304073	0.846	0.929	7.47639e-84
Ptms	6.19639e-88	-0.318428	0.905	0.964	1.05704e-83
Rac1	8.86779e-88	0.272557	0.976	0.918	1.51276e-83
Arl3	9.71594e-88	-0.293613	0.179	0.437	1.65744e-83
Fam84a	9.86297e-88	0.273238	0.295	0.079	1.68252e-83
Atp5mpl	1.06632e-87	0.297154	0.909	0.771	1.81904e-83
Adh7	1.33458e-87	0.307635	0.206	0.028	2.27667e-83
Gpa33	2.88527e-87	0.357592	0.678	0.429	4.92197e-83
Sod1	3.045e-87	0.376536	0.806	0.611	5.19447e-83
Ehd4	3.14272e-87	0.315406	0.605	0.333	5.36116e-83
Csnk1a1	3.18831e-87	-0.274103	0.945	0.975	5.43893e-83
Runx1	3.73297e-87	-0.345295	0.785	0.885	6.36808e-83
Pim3	3.85456e-87	-0.441507	0.509	0.703	6.57549e-83
Higd1a	5.34991e-87	0.31404	0.794	0.572	9.12642e-83
Cnih1	1.23097e-86	0.319214	0.633	0.376	2.0999e-82
Nfia	1.43385e-86	-0.353007	0.311	0.563	2.446e-82
Tnfrsf23	2.14568e-86	0.381353	0.34	0.11	3.66032e-82
Ndfip1	3.21868e-86	-0.304669	0.648	0.828	5.49074e-82
Limk2	5.53686e-86	-0.318354	0.29	0.546	9.44533e-82
Bspry	7.4675e-86	0.288761	0.565	0.299	1.27388e-81
Sem1	1.79251e-85	0.272108	0.949	0.852	3.05784e-81
Gpr137b	2.22471e-85	0.319313	0.409	0.168	3.79513e-81
Acsl1	4.13633e-85	-0.374611	0.396	0.635	7.05616e-81
Tmed9	5.22968e-85	-0.288182	0.898	0.959	8.92131e-81
Far1	7.90346e-85	0.413141	0.94	0.861	1.34825e-80
Klf7	1.14168e-84	-0.36996	0.42	0.647	1.9476e-80
Aldh2	1.49108e-84	0.373639	0.908	0.831	2.54364e-80
Zfp36l2	1.68831e-84	-0.413868	0.66	0.807	2.88009e-80
Tgm2	2.27163e-84	-0.352152	0.476	0.706	3.87518e-80
Tes	5.34549e-84	-0.339556	0.741	0.852	9.11888e-80
Nipsnap1	7.18019e-84	-0.297005	0.28	0.539	1.22487e-79
H2afj	9.33505e-84	0.268638	0.986	0.958	1.59247e-79
Map1lc3a	1.11033e-83	-0.319011	0.513	0.749	1.89412e-79
Smarca5	2.71656e-83	-0.309649	0.685	0.84	4.63418e-79
Ebp	2.83395e-83	0.299354	0.933	0.824	4.83444e-79
Baz2b	3.23741e-83	-0.350122	0.437	0.656	5.5227e-79
Fbxo32	3.79941e-83	-0.401723	0.336	0.588	6.48142e-79
Tnrc6c	5.94605e-83	-0.32349	0.31	0.558	1.01434e-78
Eif4ebp1	6.00857e-83	0.373313	0.653	0.418	1.025e-78
Ergic3	6.84745e-83	-0.287238	0.839	0.927	1.16811e-78
Itgb4	1.08549e-82	0.337216	0.741	0.53	1.85174e-78
Nr4a2	1.13052e-82	-0.310411	0.079	0.3	1.92856e-78
Btc	1.15071e-82	0.297466	0.541	0.278	1.963e-78
Zfand5	1.19153e-82	-0.319376	0.813	0.94	2.03264e-78
Tjp2	1.62415e-82	0.331249	0.912	0.815	2.77063e-78
Aspa	1.6354e-82	-0.387172	0.227	0.482	2.78984e-78
Ank3	2.78547e-82	-0.311418	0.166	0.412	4.75173e-78
Crebbp	8.51429e-82	-0.327947	0.526	0.718	1.45245e-77
Pum1	9.30553e-82	-0.32135	0.65	0.802	1.58743e-77
Krt23	9.84792e-82	-0.379026	0.752	0.891	1.67996e-77
Tpr	1.14233e-81	-0.275985	0.893	0.963	1.94871e-77
Hadh	1.46147e-81	-0.315363	0.498	0.711	2.49312e-77
Ehf	2.49669e-81	-0.332225	0.593	0.775	4.25911e-77
Cers2	2.59281e-81	0.315087	0.634	0.39	4.42308e-77
Rbm4b	2.66226e-81	-0.290523	0.196	0.446	4.54155e-77
Mt2	4.0878e-81	-0.475738	0.216	0.476	6.97337e-77
2020-03-07	4.47515e-81	-0.336825	0.524	0.718	7.63415e-77
Cebpb	8.28035e-81	-0.345355	0.568	0.779	1.41255e-76
Smc1a	8.58618e-81	-0.325076	0.565	0.765	1.46472e-76
Fam3c	1.71997e-80	-0.320541	0.092	0.317	2.93409e-76
Ivns1abp	3.07787e-80	-0.340887	0.459	0.671	5.25053e-76
Phc2	3.54179e-80	0.292951	0.657	0.407	6.04195e-76
Zfp467	8.16535e-80	-0.282177	0.149	0.388	1.39293e-75
St3gal6	9.88817e-80	0.312833	0.352	0.129	1.68682e-75
S100a16	1.00734e-79	0.330509	0.887	0.779	1.71843e-75
Crybg1	1.04529e-79	0.288721	0.499	0.251	1.78316e-75
Foxn3	1.55544e-79	-0.344627	0.43	0.648	2.65342e-75
Pla2g1b	1.91055e-79	-0.693518	0.031	0.213	3.25921e-75
Bik	2.78373e-79	-0.269824	0.145	0.382	4.74877e-75
Serpinb9	7.50122e-79	-0.390173	0.129	0.359	1.27963e-74
Ces2a	8.58785e-79	0.42766	0.216	0.042	1.465e-74
Igfbp7	1.33379e-78	-0.548691	0.182	0.422	2.27531e-74
Fut2	1.51942e-78	0.274526	0.478	0.229	2.59199e-74
Dpp4	1.63629e-78	-0.257203	0.106	0.332	2.79135e-74
Sptbn1	2.3546e-78	-0.280346	0.935	0.977	4.01671e-74
Fdft1	2.7339e-78	0.31624	0.467	0.227	4.66377e-74
Reep5	2.91644e-78	0.286794	0.918	0.809	4.97516e-74
Ddx3x	3.24216e-78	-0.304113	0.842	0.921	5.5308e-74
H2afy	3.90378e-78	-0.254192	0.929	0.968	6.65945e-74
Tox3	5.12539e-78	-0.357638	0.615	0.777	8.74341e-74
Il6st	5.58698e-78	-0.314372	0.26	0.501	9.53083e-74
Dlst	9.08911e-78	0.301457	0.685	0.452	1.55051e-73
Ier3	9.74109e-78	-0.447859	0.806	0.932	1.66173e-73
Spry1	1.05796e-77	-0.36206	0.266	0.503	1.80477e-73
Lpp	1.79875e-77	-0.318199	0.708	0.841	3.06849e-73
Tmbim1	2.89296e-77	0.313645	0.851	0.71	4.9351e-73
Fgfbp1	3.10669e-77	0.320836	0.289	0.087	5.29971e-73
Arid1b	3.23858e-77	-0.317787	0.302	0.536	5.52469e-73
Rorc	4.42179e-77	-0.257558	0.118	0.346	7.54314e-73
Nipbl	4.74184e-77	-0.314371	0.682	0.809	8.08911e-73
Cblc	6.09199e-77	0.305561	0.82	0.624	1.03923e-72
Arglu1	7.16557e-77	-0.305229	0.665	0.815	1.22237e-72
Serpinb6a	7.34423e-77	0.365507	0.974	0.971	1.25285e-72
AC149090.1	8.71696e-77	-0.318867	0.594	0.764	1.48703e-72
Acsm3	1.21211e-76	0.324996	0.348	0.133	2.06773e-72
Ube2n	2.10626e-76	0.279878	0.781	0.563	3.59306e-72
Pllp	4.18621e-76	0.284932	0.741	0.507	7.14126e-72
Crb3	4.29233e-76	0.315725	0.913	0.787	7.32228e-72
Ppp2ca	4.70208e-76	-0.302548	0.89	0.951	8.02128e-72
Ddrgk1	5.06355e-76	-0.293783	0.755	0.868	8.63792e-72
Pcx	8.38572e-76	0.256088	0.478	0.234	1.43052e-71
Pls3	1.60833e-75	0.31974	0.661	0.424	2.74365e-71
Hmgb3	4.04413e-75	-0.305917	0.283	0.532	6.89887e-71
Lrrc31	5.49284e-75	-0.288487	0.149	0.377	9.37023e-71
Crot	5.76116e-75	-0.344386	0.339	0.558	9.82796e-71
Vezf1	8.28489e-75	-0.307	0.302	0.536	1.41332e-70
Muc4	1.03907e-74	-0.340792	0.521	0.757	1.77255e-70
Top1	1.19271e-74	-0.276702	0.864	0.935	2.03465e-70
Rsrp1	1.4866e-74	-0.270835	0.916	0.975	2.53598e-70
Sh3d19	2.56269e-74	0.300501	0.647	0.41	4.37169e-70
Tmem183a	3.39423e-74	0.282922	0.827	0.631	5.79022e-70
Golgb1	6.54465e-74	-0.312005	0.794	0.891	1.11645e-69
Sbspon	8.6309e-74	-0.268336	0.05	0.239	1.47235e-69
Pdia6	8.79743e-74	-0.291366	0.907	0.98	1.50075e-69
Ywhab	1.19691e-73	0.251179	0.957	0.896	2.04181e-69
Chd4	1.62617e-73	-0.290325	0.818	0.913	2.77407e-69
Snrpf	2.01186e-73	0.306376	0.665	0.432	3.43204e-69
Tmco3	2.07237e-73	0.266547	0.605	0.356	3.53526e-69
Sh3kbp1	2.11647e-73	0.282004	0.378	0.159	3.61048e-69
2900026A02Rik	2.15738e-73	-0.349966	0.439	0.637	3.68027e-69
Fam71a	2.5342e-73	-0.341799	0.041	0.224	4.32308e-69
Mink1	5.88296e-73	0.265379	0.562	0.314	1.00357e-68
Srebf2	7.47976e-73	0.274342	0.62	0.374	1.27597e-68
Ldhb	9.2364e-73	-0.2618	0.051	0.239	1.57564e-68
Btbd3	1.55643e-72	0.259428	0.375	0.155	2.65511e-68
Fbp2	1.82037e-72	0.309266	0.613	0.393	3.10537e-68
Wee1	4.99857e-72	-0.285391	0.151	0.374	8.52707e-68
Anp32a	5.61495e-72	-0.263975	0.772	0.89	9.57854e-68
Nktr	8.98099e-72	-0.324935	0.671	0.808	1.53207e-67
Tmem98	9.47103e-72	-0.28836	0.288	0.521	1.61566e-67
Id1	1.04877e-71	-0.482695	0.804	0.929	1.78909e-67
Xbp1	1.16428e-71	-0.316461	0.75	0.866	1.98614e-67
Sec11c	1.62457e-71	-0.312839	0.86	0.94	2.77136e-67
Anxa11	1.82946e-71	0.305962	0.909	0.822	3.12087e-67
Rhou	2.84771e-71	-0.341845	0.31	0.535	4.85791e-67
Kitl	2.87466e-71	-0.389874	0.506	0.699	4.90389e-67
Gtf2i	3.37027e-71	-0.311963	0.405	0.621	5.74934e-67
Capsl	4.86847e-71	-0.281846	0.213	0.448	8.30513e-67
Trim44	6.02011e-71	-0.305432	0.298	0.523	1.02697e-66
Sf3b1	6.30786e-71	-0.254117	0.862	0.942	1.07606e-66
Srsf3	1.03535e-70	-0.251098	0.886	0.96	1.76621e-66
Snw1	1.7356e-70	-0.290372	0.69	0.803	2.96076e-66
R3hdm4	2.30176e-70	0.258144	0.903	0.775	3.92657e-66
Klhl24	3.13231e-70	-0.298964	0.424	0.648	5.34341e-66
Pik3r1	4.18382e-70	-0.318034	0.344	0.569	7.13719e-66
Id2	4.24604e-70	-0.398248	0.806	0.913	7.24332e-66
Zc3h12a	4.32212e-70	-0.313451	0.337	0.568	7.37311e-66
Cdc42ep5	4.51093e-70	0.28755	0.967	0.929	7.6952e-66
Snrnp70	7.59604e-70	-0.269243	0.762	0.878	1.29581e-65
Ywhag	1.01286e-69	0.28776	0.689	0.462	1.72784e-65
Ablim1	1.79653e-69	0.300013	0.926	0.825	3.0647e-65
2210407C18Rik	1.92874e-69	-0.311571	0.804	0.964	3.29023e-65
Gm19990	2.87463e-69	-0.408563	0.47	0.668	4.90384e-65
Tmed3	5.09597e-69	-0.325792	0.738	0.853	8.69321e-65
Klf11	5.98419e-69	-0.267691	0.195	0.421	1.02084e-64
Zmynd11	6.09237e-69	-0.303357	0.427	0.631	1.0393e-64
Vdac1	9.52946e-69	0.288021	0.871	0.728	1.62563e-64
Tmem223	1.80813e-68	-0.299262	0.594	0.749	3.08449e-64
Pdcd4	1.83524e-68	-0.350559	0.554	0.727	3.13073e-64
Mxd4	2.34127e-68	-0.31383	0.422	0.632	3.99397e-64
Nr2f2	2.48768e-68	-0.333958	0.412	0.61	4.24373e-64
Tmem123	3.72342e-68	-0.331649	0.34	0.549	6.35178e-64
Ash1l	3.82049e-68	-0.294582	0.672	0.8	6.51737e-64
Glg1	4.24161e-68	-0.291469	0.643	0.795	7.23575e-64
Gm26894	4.75327e-68	0.355863	0.367	0.162	8.1086e-64
Tcf4	4.82461e-68	-0.322503	0.572	0.745	8.23031e-64
Ppa1	9.8434e-68	0.323705	0.685	0.478	1.67919e-63
Bok	1.24118e-67	0.390408	0.788	0.612	2.11732e-63
Ugcg	1.72187e-67	0.302453	0.686	0.461	2.93733e-63
Smagp	2.58782e-67	0.268782	0.89	0.759	4.41457e-63
Ccnd1	2.74866e-67	0.421927	0.858	0.732	4.68894e-63
Hnrnpr	3.21026e-67	-0.300139	0.491	0.682	5.47638e-63
Elovl1	3.40992e-67	0.265883	0.697	0.462	5.81698e-63
Slc25a1	3.42179e-67	0.285172	0.669	0.455	5.83723e-63
1110008P14Rik	4.44286e-67	0.294026	0.582	0.359	7.57908e-63
Gsk3b	5.79028e-67	-0.286984	0.701	0.82	9.87765e-63
Aldh1a3	7.23288e-67	0.299762	0.206	0.046	1.23386e-62
Cracr2b	8.39836e-67	0.267033	0.632	0.4	1.43268e-62
C130074G19Rik	8.81739e-67	0.29756	0.533	0.309	1.50416e-62
Ptpn13	9.8732e-67	-0.306411	0.259	0.486	1.68427e-62
Cycs	1.56866e-66	0.282166	0.935	0.858	2.67598e-62
Ccdc71l	1.94396e-66	0.26807	0.496	0.268	3.3162e-62
Magi3	2.07906e-66	-0.311449	0.318	0.53	3.54667e-62
Kmt2a	3.39387e-66	-0.317956	0.488	0.671	5.78961e-62
Epha2	4.37974e-66	0.319164	0.635	0.419	7.4714e-62
Cdh1	5.01896e-66	0.312248	0.977	0.959	8.56185e-62
Hras	5.24636e-66	0.25337	0.893	0.766	8.94976e-62
Pla2g4c	5.50194e-66	0.316146	0.216	0.054	9.38575e-62
Slc9a3r1	5.84307e-66	0.251818	0.623	0.386	9.9677e-62
Acsl5	6.85367e-66	0.277482	0.794	0.608	1.16917e-61
Pcdh1	7.52159e-66	0.260904	0.578	0.349	1.28311e-61
Cib1	9.64083e-66	0.252143	0.953	0.886	1.64463e-61
Auts2	1.20272e-65	-0.300003	0.343	0.56	2.05173e-61
Tecr	1.33779e-65	-0.263429	0.78	0.886	2.28213e-61
Ets2	1.83329e-65	-0.33321	0.44	0.629	3.1274e-61
Colgalt1	3.01071e-65	-0.296052	0.403	0.607	5.13597e-61
Shroom3	3.33113e-65	-0.28974	0.685	0.823	5.68257e-61
Arhgap5	5.75505e-65	-0.262901	0.84	0.913	9.81753e-61
Trappc6a	5.77122e-65	-0.294921	0.506	0.686	9.84513e-61
Lrg1	6.2162e-65	-0.532485	0.108	0.306	1.06042e-60
Madd	8.38852e-65	0.250679	0.467	0.244	1.431e-60
Gm17056	8.62451e-65	-0.286124	0.078	0.263	1.47126e-60
Ddx50	8.81455e-65	-0.287765	0.489	0.674	1.50367e-60
Onecut2	1.15463e-64	-0.41339	0.889	0.934	1.96968e-60
Cd164	1.27362e-64	-0.282401	0.711	0.828	2.17267e-60
Cmbl	2.10758e-64	0.258304	0.503	0.277	3.59533e-60
Klf4	2.81548e-64	0.290266	0.969	0.922	4.80292e-60
Stmn1	3.87782e-64	-0.295879	0.318	0.575	6.61518e-60
Bzw1	5.3574e-64	-0.258155	0.8	0.893	9.13919e-60
Sgms2	5.87898e-64	0.297853	0.456	0.241	1.0029e-59
Clcn3	6.51891e-64	-0.303488	0.591	0.748	1.11206e-59
Slco2a1	6.56646e-64	0.415359	0.468	0.257	1.12017e-59
Lmo4	6.64531e-64	0.315142	0.937	0.9	1.13362e-59
Cirbp	1.82528e-63	-0.291905	0.29	0.506	3.11374e-59
Ttc39a	1.97312e-63	0.263081	0.632	0.408	3.36595e-59
Ogt	3.45264e-63	-0.277631	0.619	0.782	5.88986e-59
Chmp6	4.68507e-63	0.264496	0.559	0.342	7.99227e-59
Rela	5.22097e-63	-0.287968	0.331	0.538	8.90645e-59
Exoc3l4	6.02611e-63	0.277949	0.355	0.156	1.02799e-58
Tnfaip2	8.997e-63	0.403923	0.298	0.114	1.5348e-58
Pla2g12a	1.20367e-62	-0.262541	0.235	0.454	2.05333e-58
Ubxn4	1.46018e-62	-0.269066	0.755	0.851	2.49092e-58
Tut4	1.65408e-62	-0.261239	0.13	0.331	2.82169e-58
Hsd17b11	2.30896e-62	0.283533	0.827	0.663	3.93886e-58
Gstp1	2.66708e-62	0.290681	0.635	0.424	4.54978e-58
Neat1	2.68982e-62	0.320044	0.997	1	4.58856e-58
Smc3	2.7058e-62	-0.2842	0.554	0.727	4.61582e-58
Tcf25	3.42262e-62	-0.250384	0.825	0.902	5.83865e-58
Gm26802	3.95247e-62	-0.285032	0.044	0.207	6.74251e-58
Raph1	5.30277e-62	0.33727	0.767	0.589	9.046e-58
Pgm2l1	9.76053e-62	-0.253575	0.123	0.321	1.66505e-57
Rtf1	1.44544e-61	-0.281899	0.558	0.719	2.46578e-57
Me2	2.1913e-61	0.303135	0.506	0.292	3.73814e-57
Epb41l2	2.38937e-61	0.286675	0.601	0.384	4.07603e-57
Slc25a51	2.71372e-61	-0.281144	0.295	0.503	4.62933e-57
Itih2	2.82734e-61	-0.293822	0.373	0.617	4.82316e-57
Apoa1	4.05323e-61	-0.279605	0.086	0.274	6.91441e-57
Pbx1	4.88987e-61	-0.276557	0.658	0.804	8.34163e-57
Numa1	6.78375e-61	-0.28666	0.516	0.685	1.15724e-56
BC005561	7.06417e-61	-0.2898	0.318	0.534	1.20508e-56
Myo1a	1.10151e-60	0.276675	0.482	0.264	1.87907e-56
Hint2	3.32955e-60	-0.253544	0.735	0.839	5.67988e-56
Cyba	9.19077e-60	-0.262123	0.935	0.987	1.56785e-55
Tmco1	1.49219e-59	-0.251847	0.75	0.854	2.54553e-55
Neurl3	3.51479e-59	-0.38265	0.714	0.819	5.99589e-55
Nfic	4.30194e-59	-0.261248	0.185	0.387	7.33867e-55
Wnt4	7.09788e-59	-0.354856	0.184	0.39	1.21083e-54
Nfat5	9.67309e-59	0.314074	0.696	0.519	1.65013e-54
Pfdn1	1.63435e-58	0.263223	0.873	0.74	2.78804e-54
Bod1l	1.70915e-58	-0.283008	0.65	0.783	2.91564e-54
Zc3h13	2.32833e-58	-0.292639	0.462	0.644	3.97189e-54
H2-D1	3.08405e-58	0.310796	0.981	0.968	5.26107e-54
Deptor	4.85463e-58	-0.288959	0.41	0.602	8.28151e-54
Sftpb	5.71308e-58	0.385583	0.348	0.158	9.74595e-54
Sptssb	7.46771e-58	0.527129	0.841	0.79	1.27392e-53
Ccng2	8.38975e-58	0.250524	0.362	0.167	1.43121e-53
Ang	1.2314e-57	0.261654	0.596	0.368	2.10064e-53
Rhoc	1.50954e-57	0.610676	0.698	0.651	2.57512e-53
Casp6	2.57701e-57	-0.2803	0.352	0.546	4.39613e-53
Eprs	3.7254e-57	-0.251996	0.739	0.862	6.35515e-53
Pik3c2a	3.83074e-57	-0.284737	0.367	0.565	6.53486e-53
Sestd1	4.07992e-57	-0.268991	0.321	0.525	6.95994e-53
Prom1	5.44945e-57	-0.290073	0.682	0.808	9.29622e-53
Prpf4b	9.23682e-57	-0.27171	0.625	0.77	1.57571e-52
Galnt4	1.96391e-56	0.255809	0.663	0.449	3.35023e-52
Tnrc6a	2.04517e-56	-0.277139	0.468	0.644	3.48886e-52
Thrap3	2.43027e-56	-0.286367	0.581	0.719	4.1458e-52
N4bp2l2	2.89348e-56	-0.271603	0.557	0.718	4.93598e-52
Zfp91	3.59396e-56	-0.25756	0.686	0.81	6.13093e-52
Csnk1e	3.7038e-56	-0.271368	0.39	0.583	6.31832e-52
Gata6	4.52189e-56	-0.289241	0.695	0.795	7.71389e-52
Crip1	4.92374e-56	0.521777	0.949	0.955	8.39941e-52
Dcaf8	9.59084e-56	-0.264215	0.386	0.582	1.6361e-51
Gfpt1	1.16849e-55	0.284273	0.88	0.777	1.99333e-51
Fn1	2.3794e-55	-0.250845	0.088	0.262	4.05901e-51
Gon4l	3.741e-55	-0.254362	0.345	0.54	6.38176e-51
Fam208a	6.17583e-55	-0.285368	0.398	0.584	1.05354e-50
Kcnq1	6.70099e-55	-0.309409	0.398	0.581	1.14312e-50
Zmiz1	8.98805e-55	-0.271688	0.519	0.684	1.53327e-50
Kcnn4	9.4235e-55	0.26388	0.671	0.473	1.60756e-50
Casz1	1.36019e-54	-0.286105	0.394	0.574	2.32035e-50
Fcgbp	1.54434e-54	-0.252053	0.091	0.268	2.6345e-50
Clic4	1.5763e-54	0.289573	0.735	0.53	2.68901e-50
Coro2a	1.71934e-54	0.280288	0.586	0.393	2.93303e-50
Hsph1	1.80444e-54	0.288358	0.731	0.543	3.0782e-50
1110008L16Rik	1.94804e-54	-0.252749	0.356	0.564	3.32317e-50
Chd2	2.19303e-54	-0.289896	0.351	0.539	3.74109e-50
Rlim	2.93567e-54	-0.312978	0.503	0.664	5.00796e-50
Asap2	3.74243e-54	0.263822	0.718	0.527	6.38421e-50
Ntan1	4.93298e-54	-0.254291	0.431	0.615	8.41517e-50
Kdm6b	5.72788e-54	-0.285278	0.386	0.566	9.77119e-50
Golim4	1.02593e-53	-0.278381	0.334	0.531	1.75014e-49
Tmprss2	1.08985e-53	-0.278542	0.72	0.818	1.85918e-49
Tmc5	1.41294e-53	-0.27345	0.372	0.568	2.41034e-49
Isg15	2.73343e-53	0.405395	0.176	0.042	4.66296e-49
Lzts2	2.99605e-53	-0.2639	0.401	0.582	5.11096e-49
Add3	1.11606e-52	-0.259156	0.373	0.565	1.9039e-48
Pigyl	1.41183e-52	-0.25229	0.64	0.765	2.40845e-48
Tnfrsf11b	1.6964e-52	0.354172	0.403	0.213	2.89389e-48
Ppic	1.19245e-51	-0.257471	0.174	0.363	2.03419e-47
Kdm5b	1.78126e-51	-0.267972	0.415	0.589	3.03866e-47
AA986860	6.72594e-51	-0.279141	0.507	0.666	1.14738e-46
Tmem63b	7.56567e-51	0.25874	0.73	0.564	1.29063e-46
Smarca2	1.10896e-50	-0.254971	0.347	0.533	1.89177e-46
Nedd9	1.39015e-50	-0.279613	0.322	0.511	2.37146e-46
Retreg1	1.88881e-50	-0.262079	0.647	0.786	3.22212e-46
Bhlhe40	5.05702e-50	-0.282227	0.454	0.628	8.62677e-46
Hes1	5.686e-50	0.334369	0.608	0.411	9.69974e-46
Hnrnpd	6.30657e-50	-0.255433	0.618	0.748	1.07584e-45
0610040J01Rik	1.01136e-49	-0.250316	0.557	0.712	1.72528e-45
Olfm4	1.42075e-49	-0.602553	0.026	0.151	2.42366e-45
Slc25a36	1.84878e-49	-0.251997	0.304	0.492	3.15383e-45
Btg1	1.86721e-49	0.325065	0.933	0.897	3.18528e-45
Slc25a5	1.97417e-49	0.251458	0.991	0.987	3.36774e-45
Cgnl1	4.12214e-49	-0.270094	0.458	0.62	7.03196e-45
Misp	6.11768e-49	0.256831	0.529	0.339	1.04362e-44
Pcm1	6.31046e-49	-0.271839	0.433	0.599	1.0765e-44
Chka	1.08543e-48	-0.320707	0.768	0.886	1.85164e-44
Hnrnpa1	1.19436e-48	-0.261285	0.669	0.812	2.03745e-44
Adgre5	6.28471e-48	0.255724	0.512	0.315	1.07211e-43
Smarcc1	1.20901e-47	-0.258503	0.527	0.677	2.06245e-43
Peli1	1.53251e-47	-0.2805	0.504	0.65	2.61431e-43
Tnfrsf12a	1.66176e-47	0.254694	0.847	0.715	2.8348e-43
Prss8	2.93519e-47	-0.257054	0.433	0.599	5.00714e-43
Ttc14	4.84457e-47	-0.255344	0.557	0.69	8.26436e-43
Piga	2.74365e-46	-0.258797	0.226	0.401	4.6804e-42
Rsf1	3.30228e-46	-0.272293	0.48	0.623	5.63335e-42
Dnajb1	3.61208e-45	-0.486818	0.645	0.738	6.16186e-41
Sprr2a3	5.10666e-45	0.487952	0.256	0.106	8.71145e-41
Lgals9	3.02455e-44	0.258	0.759	0.613	5.15958e-40
Ccnd2	5.34987e-44	-0.253639	0.817	0.95	9.12635e-40
Ube2c	1.02006e-43	0.525514	0.163	0.044	1.74012e-39
Cd74	2.11352e-43	-0.798855	0.201	0.377	3.60545e-39
Nbl1	8.89478e-43	0.332519	0.657	0.523	1.51736e-38
Mmp7	6.35773e-42	-0.313498	0.008	0.101	1.08456e-37
Tuba1a	8.82894e-42	-0.260196	0.065	0.198	1.50613e-37
Sult1b1	1.47029e-40	0.257341	0.373	0.211	2.50817e-36
Maff	2.34431e-40	-0.298811	0.409	0.558	3.99916e-36
Plaur	3.38482e-39	0.319082	0.794	0.681	5.77417e-35
Shh	4.40526e-39	0.292505	0.295	0.147	7.51494e-35
Hilpda	2.27791e-38	0.36145	0.303	0.16	3.88588e-34
Muc3	7.06669e-37	0.471649	0.206	0.082	1.20551e-32
Ifit1bl1	8.45509e-37	0.505841	0.266	0.131	1.44235e-32
Pold4	1.08949e-36	0.296608	0.631	0.487	1.85856e-32
Id3	1.5896e-36	-0.378528	0.634	0.753	2.7117e-32
Tubb4b	8.01119e-36	0.297068	0.974	0.98	1.36663e-31
Ran	8.57893e-36	0.301191	0.965	0.949	1.46348e-31
Akr1b7	3.8323e-35	0.471275	0.317	0.178	6.53751e-31
Acox1	2.7824e-34	0.261313	0.742	0.618	4.7465e-30
Slc12a2	5.42628e-34	0.316536	0.976	0.981	9.25668e-30
Bst2	2.68227e-32	0.310065	0.447	0.295	4.57569e-28
Pclaf	2.73571e-31	0.288572	0.128	0.038	4.66685e-27
Birc5	3.22921e-29	0.370591	0.13	0.042	5.50871e-25
Depp1	4.22448e-28	0.322502	0.502	0.367	7.20655e-24
Cks2	2.19718e-27	0.252515	0.27	0.147	3.74817e-23
Ltf	1.57335e-26	0.456964	0.266	0.148	2.68397e-22
Rgs17	5.24815e-26	0.264419	0.752	0.672	8.95282e-22
Msln	7.528e-26	0.470188	0.833	0.828	1.2842e-21
Bmp2	9.07318e-26	0.292817	0.483	0.364	1.54779e-21
Ly6k	1.02175e-25	0.408758	0.497	0.384	1.74301e-21
Cdkn1a	2.37123e-25	0.376208	0.571	0.467	4.04509e-21
Gmds	9.2608e-24	0.338684	0.762	0.74	1.5798e-19
Vnn1	1.55526e-23	0.559775	0.682	0.65	2.65313e-19
Sftpc	1.92398e-23	0.262359	0.711	0.61	3.28211e-19
Gm26917	3.15129e-23	-0.660078	0.377	0.492	5.37579e-19
Mki67	1.26991e-22	0.34248	0.153	0.066	2.16634e-18
Ecscr	2.23409e-22	0.252824	0.423	0.312	3.81113e-18
Lgals2	4.93714e-21	0.456257	0.408	0.307	8.42226e-17
Lypd8	6.83056e-21	0.909291	0.665	0.605	1.16523e-16
Ccn2	5.07325e-19	0.31329	0.241	0.149	8.65446e-15
Pttg1ip	9.38051e-18	0.276971	0.91	0.907	1.60022e-13
Ambp	5.70283e-13	-0.325522	0.378	0.482	9.72846e-09
Lgals3	6.19873e-13	0.529022	0.778	0.812	1.05744e-08
Hist1h1c	9.88611e-13	0.263199	0.58	0.508	1.68647e-08
Top2a	1.81811e-12	0.288331	0.118	0.061	3.10151e-08
H2-Ab1	1.47398e-11	-0.311386	0.067	0.123	2.51445e-07
Nrn1	2.30094e-11	0.28512	0.138	0.083	3.92518e-07
Tff3	0.000345905	0.887112	0.566	0.57	1
Ctsl	0.0115173	0.256419	0.72	0.778	1

## Sheet: BP treated vs. BPN treated
	p_val	avg_logFC	pct.1	pct.2	p_val_adj
Sftpa1	0	4.3396	0.803	0.134	0
Ager	0	3.92327	0.979	0.094	0
Scd1	0	3.59424	0.874	0.117	0
Sftpb	0	3.23813	0.88	0.158	0
Slc34a2	0	3.03853	0.586	0.03	0
Napsa	0	2.55677	0.935	0.044	0
Sparc	0	2.35137	0.885	0.028	0
Lpcat1	0	2.05544	0.778	0.046	0
Aqp5	0	2.0394	0.982	0.438	0
Selenbp1	0	1.82067	0.989	0.539	0
Msn	0	1.80119	0.809	0.091	0
Akap5	0	1.78425	0.561	0.019	0
Lamp3	0	1.7355	0.525	0.011	0
Rgcc	0	1.69772	0.706	0.02	0
Sec14l3	0	1.66578	0.65	0.01	0
Sfta2	0	1.62141	0.722	0.073	0
Dram1	0	1.47975	0.702	0.007	0
Fam189a2	0	1.4222	0.693	0.044	0
Ppp1r14c	0	1.38824	0.618	0.006	0
Pmp22	0	1.34905	0.587	0.01	0
Lgi3	0	1.31538	0.589	0.01	0
Limch1	0	1.28486	0.612	0.013	0
Emb	0	1.27663	0.734	0.019	0
Igfbp6	0	1.25843	0.587	0.013	0
Col4a4	0	1.24177	0.576	0.021	0
Soat1	0	1.14925	0.596	0.03	0
Nkx2-1	0	1.1247	0.755	0.031	0
Tns1	0	1.11328	0.717	0.046	0
Cd36	0	1.10892	0.548	0.013	0
Clip4	0	0.990189	0.633	0.009	0
Gja1	0	0.860736	0.554	0.016	0
Arhgap31	0	0.695917	0.537	0.007	0
Hopx	6.85606e-308	1.62475	0.59	0.035	1.16958e-303
Ramp1	1.1551e-304	0.876335	0.555	0.022	1.97049e-300
Fermt2	5.83653e-301	0.849246	0.616	0.046	9.95653e-297
Lpin2	6.41447e-300	1.23606	0.83	0.197	1.09424e-295
Gsta4	5.85097e-299	-1.37999	0.957	1	9.98116e-295
Prrg3	7.29461e-292	0.888202	0.476	0.005	1.24439e-287
Clu	3.38801e-291	-1.64186	0.999	1	5.77961e-287
Npc2	2.80837e-288	2.06394	1	0.986	4.7908e-284
Cd74	3.24106e-281	1.87637	0.97	0.377	5.52893e-277
Lgals4	3.26464e-279	-1.38824	0.778	0.995	5.56914e-275
Nkd1	6.03483e-279	0.802957	0.464	0.006	1.02948e-274
Ndnf	1.31922e-278	1.29245	0.583	0.046	2.25045e-274
Atp11a	2.15618e-278	1.2869	0.785	0.198	3.67823e-274
Clic3	1.59492e-274	1.70221	0.867	0.283	2.72077e-270
Mettl7a1	8.77611e-274	1.32871	0.824	0.233	1.49712e-269
Plac8	7.43831e-273	-1.40506	0.778	0.997	1.2689e-268
Hc	7.54183e-269	1.59748	0.461	0.009	1.28656e-264
Gsto1	1.60529e-268	-1.31244	0.906	1	2.73847e-264
Prnp	1.71361e-268	1.10195	0.699	0.124	2.92325e-264
Sftpc	4.22652e-268	5.59877	0.967	0.61	7.21002e-264
Gramd2	4.47605e-268	0.907532	0.525	0.03	7.6357e-264
Fxyd3	4.3649e-264	-1.16036	0.864	0.999	7.44608e-260
Lyz2	1.37044e-262	4.28309	0.806	0.203	2.33783e-258
Matn4	3.28586e-261	0.843757	0.597	0.061	5.60535e-257
Rasl11a	6.69102e-261	0.906699	0.522	0.031	1.14142e-256
Chil1	8.07623e-259	2.49167	0.481	0.02	1.37772e-254
Pdlim2	7.42221e-257	1.06615	0.684	0.115	1.26615e-252
Sec14l4	3.817e-256	0.543088	0.446	0.009	6.51141e-252
Sult1c2	3.16868e-255	-1.26121	0.637	0.976	5.40545e-251
Itga9	1.7803e-249	0.59159	0.41	0.003	3.03701e-245
Rgs10	2.95016e-248	0.6807	0.471	0.02	5.03267e-244
Egfl6	3.06969e-245	0.846081	0.483	0.026	5.23658e-241
Cbr2	1.19806e-244	2.27476	0.493	0.031	2.04376e-240
Crlf1	9.81314e-244	0.610494	0.404	0.004	1.67402e-239
Cat	2.76581e-243	1.24549	0.73	0.182	4.7182e-239
Cyp2f2	3.28634e-243	1.99863	0.465	0.021	5.60616e-239
Krt8	4.49799e-243	-0.940816	0.999	1	7.67313e-239
Aox3	1.02422e-240	1.15189	0.413	0.007	1.74722e-236
Epcam	7.7779e-240	-0.803556	0.979	1	1.32683e-235
Cfi	1.8084e-239	-1.24188	0.614	0.977	3.08495e-235
Cd24a	4.42982e-239	-0.946567	0.911	1	7.55683e-235
Pigr	1.90647e-238	-1.51254	0.842	0.991	3.25225e-234
Hp	3.39832e-234	2.131	0.607	0.093	5.79719e-230
Acsl4	1.10417e-233	1.06807	0.637	0.112	1.8836e-229
Bmp1	5.32395e-233	0.734062	0.46	0.024	9.08213e-229
Lrrk2	1.25575e-231	0.63361	0.406	0.008	2.14219e-227
Col4a3	4.32738e-231	0.882343	0.4	0.008	7.38208e-227
Traf1	4.82721e-228	0.709067	0.494	0.038	8.23473e-224
Krt18	9.43473e-227	-0.838993	0.993	1	1.60947e-222
Rps5	4.24496e-226	-0.636946	1	1	7.24148e-222
Lrrc8c	7.52021e-226	0.551432	0.403	0.01	1.28287e-221
Rtkn2	8.69149e-224	1.07802	0.392	0.008	1.48268e-219
Plet1	6.30273e-223	-1.17345	0.669	0.975	1.07518e-218
2210407C18Rik	4.86852e-222	-1.57807	0.711	0.964	8.30521e-218
Tspan11	6.47287e-219	0.556187	0.363	0.003	1.10421e-214
Bag1	1.25764e-218	-0.682069	0.994	1	2.14541e-214
Eef1a1	1.51249e-218	-0.553286	1	1	2.58015e-214
Col4a1	1.13476e-216	0.934988	0.691	0.161	1.93579e-212
Lrp2	9.73474e-211	0.70773	0.359	0.005	1.66065e-206
Bace2	1.41338e-208	-0.989647	0.627	0.952	2.41108e-204
Gpx4	1.62533e-205	0.854503	1	0.996	2.77264e-201
Scd2	4.13768e-205	1.19599	0.946	0.617	7.05847e-201
Cd2ap	5.65801e-205	-0.761803	0.939	1	9.65201e-201
Rpsa	1.4852e-204	-0.59208	1	1	2.5336e-200
Rbpjl	2.22829e-204	0.471705	0.346	0.004	3.80124e-200
Rps2	2.64614e-203	-0.600336	1	1	4.51405e-199
Rpl7	1.48377e-202	-0.527721	1	1	2.53116e-198
Tff2	1.54375e-202	-1.58155	0.792	0.985	2.63348e-198
Rps18	1.44489e-201	-0.624042	1	1	2.46483e-197
Col4a2	3.55793e-201	0.728125	0.515	0.065	6.06947e-197
Eef1b2	6.97771e-201	-0.636924	1	1	1.19033e-196
Ttr	1.55282e-200	-1.42686	0.611	0.94	2.64895e-196
Rps9	2.18212e-200	-0.506632	1	1	3.72248e-196
Rpl12	2.44013e-200	-0.623271	1	1	4.16261e-196
Rps16	5.70549e-200	-0.528418	1	1	9.73299e-196
Rpl23	1.34622e-197	-0.519387	1	1	2.29652e-193
Smim6	1.54136e-197	-0.948805	0.665	0.951	2.6294e-193
Ptma	5.41512e-197	-0.58722	1	1	9.23765e-193
Pdzk1ip1	2.5925e-196	-1.20005	0.853	0.973	4.42254e-192
Atp6v1c2	6.08659e-196	0.426535	0.327	0.002	1.03831e-191
Meg3	6.52324e-195	1.17076	0.356	0.01	1.1128e-190
Fermt1	1.63117e-194	-0.840981	0.572	0.934	2.78261e-190
Cox6a2	1.79157e-194	1.05827	0.334	0.005	3.05624e-190
Rplp0	2.16968e-194	-0.630217	1	1	3.70126e-190
Csrp2	1.0959e-193	-1.0161	0.594	0.927	1.8695e-189
Pde7a	1.14627e-193	0.815538	0.59	0.114	1.95543e-189
Vamp8	8.83336e-193	0.709417	1	0.996	1.50688e-188
Ctse	2.24059e-192	-0.957647	0.659	0.955	3.82223e-188
Rack1	4.34006e-191	-0.573045	1	1	7.40371e-187
Elf5	8.0167e-190	0.439459	0.316	0.002	1.36757e-185
Tspan8	1.67513e-189	-0.707259	0.986	1	2.8576e-185
Atp8a1	7.97171e-189	1.02676	0.975	0.688	1.35989e-184
Rpl13	3.75827e-188	-0.505202	1	1	6.41124e-184
Dhrs3	4.03585e-188	0.899821	0.855	0.374	6.88476e-184
Rps3	8.77832e-188	-0.509373	1	1	1.49749e-183
Clic5	2.33309e-187	1.67459	0.787	0.336	3.98002e-183
Ces1d	2.85394e-186	1.03782	0.662	0.16	4.86854e-182
H2-Aa	5.38686e-186	1.29847	0.535	0.082	9.18944e-182
Rassf2	1.33273e-184	0.41027	0.321	0.005	2.2735e-180
Rplp1	4.05407e-183	-0.473166	1	1	6.91583e-179
Rpl28	1.75397e-181	-0.500873	1	1	2.99211e-177
Chia1	2.4359e-181	0.938903	0.305	0.002	4.1554e-177
Hs2st1	2.92586e-181	1.17616	0.705	0.234	4.99122e-177
Rpl19	8.54296e-181	-0.423154	1	1	1.45734e-176
Cnn2	3.85835e-180	0.912589	0.92	0.467	6.58196e-176
Onecut2	6.48719e-178	-1.27484	0.68	0.934	1.10665e-173
Rps20	6.48908e-178	-0.503331	1	1	1.10697e-173
Tpt1	1.69941e-177	-0.502973	1	1	2.89903e-173
Rps4x	2.88113e-177	-0.537743	1	1	4.91491e-173
Atp6v1g1	1.35624e-176	0.770936	0.997	0.972	2.3136e-172
Etv5	1.88469e-176	0.741735	0.368	0.022	3.2151e-172
Dlc1	3.1907e-176	0.383026	0.312	0.006	5.44301e-172
Cd200	7.88331e-176	0.605701	0.468	0.059	1.34481e-171
H2-Ab1	9.25655e-175	1.09385	0.602	0.123	1.57907e-170
Ctsh	3.59036e-174	0.957158	1	0.993	6.12479e-170
Rpl30	5.68516e-174	-0.481019	1	1	9.69832e-170
Kcnc3	1.33283e-173	0.480697	0.357	0.019	2.27367e-169
Qk	1.68839e-173	1.14075	0.856	0.473	2.88022e-169
Scnn1b	3.0253e-173	0.475419	0.294	0.003	5.16085e-169
Cdc42ep3	1.5806e-171	0.624585	0.488	0.07	2.69635e-167
Rps24	6.93758e-170	-0.484251	1	1	1.18348e-165
Cryab	8.93547e-170	1.38431	0.773	0.317	1.5243e-165
Ybx1	3.10337e-169	-0.509663	1	1	5.29404e-165
Pglyrp1	8.25112e-169	-0.846079	0.658	0.949	1.40756e-164
Myh14	2.34512e-168	0.9499	0.974	0.717	4.00053e-164
Ly6d	3.73865e-168	-1.41643	0.816	0.967	6.37776e-164
Ccnd2	5.656e-168	-1.11694	0.699	0.95	9.64857e-164
Car2	1.13367e-167	-0.978507	0.784	0.955	1.93393e-163
Cldn3	1.25643e-167	0.950913	0.986	0.628	2.14335e-163
Esam	1.85669e-167	0.66275	0.47	0.068	3.16734e-163
Scara3	4.15168e-167	-0.849951	0.36	0.859	7.08234e-163
Gde1	6.07277e-167	0.80366	0.988	0.833	1.03595e-162
Cxcl15	1.27704e-166	2.67149	0.666	0.221	2.17849e-162
Rps7	4.5211e-166	-0.515593	1	1	7.71255e-162
Elf3	7.52096e-166	-0.818605	0.813	0.966	1.283e-161
Ptprf	8.64489e-166	0.754879	0.997	0.874	1.47473e-161
Npr1	9.4381e-165	0.333026	0.276	0.002	1.61005e-160
Emp2	3.9166e-164	1.48425	0.993	0.938	6.68133e-160
Sorbs2	2.74241e-163	-1.0097	0.485	0.874	4.67827e-159
Fasn	1.30306e-162	1.50781	0.681	0.256	2.22289e-158
Slco4c1	2.2719e-162	0.456863	0.32	0.013	3.87563e-158
Adam19	2.8628e-162	0.406119	0.278	0.003	4.88365e-158
Nrp1	1.01186e-161	0.726985	0.532	0.106	1.72613e-157
Rps12	4.65894e-161	-0.448006	1	1	7.94769e-157
Npw	2.71443e-160	0.489025	0.402	0.041	4.63055e-156
Rps11	5.97941e-160	-0.418722	1	1	1.02003e-155
Tmem213	1.4904e-159	0.551363	0.325	0.016	2.54248e-155
Mfap3l	5.1169e-159	0.319939	0.277	0.004	8.72893e-155
Trpm6	6.90332e-159	0.363167	0.299	0.009	1.17764e-154
Zfpm1	6.95512e-159	-0.795585	0.582	0.905	1.18647e-154
Nckap5	1.12627e-158	0.772021	0.708	0.238	1.9213e-154
Tm9sf3	2.81854e-158	-0.624334	0.956	0.997	4.80816e-154
Snx25	2.00795e-157	0.452901	0.382	0.036	3.42536e-153
Ly6c1	2.12755e-157	0.664265	0.35	0.024	3.62938e-153
Nnat	2.56992e-157	0.715141	0.294	0.009	4.38403e-153
Gas6	6.28093e-157	-0.855776	0.931	0.991	1.07146e-152
Crip2	8.18156e-157	1.14763	0.986	0.875	1.39569e-152
Serpine2	4.1158e-156	0.432185	0.339	0.021	7.02114e-152
Psca	2.28723e-154	-0.952831	0.859	0.997	3.90178e-150
Slc6a14	1.31815e-153	0.515287	0.337	0.022	2.24863e-149
Rplp2	2.0226e-153	-0.455132	1	1	3.45036e-149
Mlc1	2.47856e-153	0.354909	0.252	0	4.22817e-149
Aldh1a7	7.07051e-153	0.39824	0.287	0.008	1.20616e-148
Swt1	8.10142e-153	0.787207	0.794	0.407	1.38202e-148
Ctsc	1.64805e-152	1.01865	0.913	0.527	2.81142e-148
Gstm1	1.22509e-151	-0.77656	0.841	0.98	2.08989e-147
Slc39a8	1.98807e-151	0.72585	0.555	0.129	3.39146e-147
Kctd14	7.21046e-151	-0.925581	0.641	0.902	1.23003e-146
Lcn2	7.98507e-151	1.83417	0.425	0.057	1.36217e-146
Rpl3	1.98138e-150	-0.452061	1	1	3.38004e-146
Ehd2	2.50264e-149	0.759557	0.51	0.107	4.26926e-145
Rpl15	1.00564e-148	-0.450932	1	1	1.71553e-144
Rpl17	3.6162e-148	-0.424892	1	1	6.16888e-144
Secisbp2l	4.70933e-148	0.828774	0.673	0.257	8.03364e-144
Alcam	5.25629e-148	0.611941	1	0.992	8.9667e-144
Oit1	1.04226e-147	-0.813045	0.566	0.869	1.778e-143
Ndst1	2.88701e-147	1.06369	0.724	0.318	4.92496e-143
Enpep	7.15988e-147	0.353818	0.256	0.003	1.2214e-142
Oaz2	8.41789e-147	0.727151	0.641	0.219	1.43601e-142
Rpl32	1.22642e-146	-0.434546	1	1	2.09215e-142
Klf5	3.00423e-146	-0.623256	0.943	0.996	5.12492e-142
Abca3	9.34914e-146	1.25862	0.859	0.567	1.59487e-141
Golm1	2.09545e-145	-0.751394	0.763	0.954	3.57463e-141
Cxcl17	6.53426e-145	-0.675566	0.799	0.965	1.11468e-140
Rpl4	1.55337e-144	-0.455727	0.999	1	2.6499e-140
Sri	2.73385e-144	-0.582375	0.939	0.998	4.66367e-140
Igfbp7	5.97342e-144	1.47876	0.845	0.422	1.01901e-139
Serpinh1	6.18044e-144	0.642726	0.539	0.124	1.05432e-139
Ociad2	9.183e-144	-0.635718	0.824	0.974	1.56653e-139
Elovl1	1.42005e-143	1.20333	0.856	0.462	2.42247e-139
Chchd10	1.78374e-143	0.705959	0.996	0.962	3.04289e-139
Rpl10	2.41947e-143	-0.451766	1	1	4.12737e-139
Tcim	3.31438e-143	-0.969356	0.409	0.825	5.65399e-139
Stard10	1.01041e-142	-0.501087	0.982	1	1.72366e-138
Tm4sf1	1.68212e-142	-1.38261	0.701	0.899	2.86952e-138
Iqgap1	4.6707e-142	0.566917	1	0.976	7.96775e-138
Tmem50b	8.44462e-142	0.604731	0.536	0.132	1.44057e-137
Il18	1.43596e-141	-0.83451	0.565	0.869	2.44961e-137
Aldh2	4.71339e-141	0.660133	0.989	0.831	8.04056e-137
Ptprm	5.67145e-141	0.388252	0.323	0.024	9.67493e-137
Prom1	8.07909e-141	-0.729873	0.331	0.808	1.37821e-136
Rpl5	4.52503e-139	-0.455872	1	1	7.71924e-135
Fbln5	6.61485e-139	0.487698	0.28	0.013	1.12843e-134
Rpl9	1.41832e-138	-0.409764	1	1	2.41951e-134
Scnn1a	4.40331e-138	0.827551	0.726	0.343	7.51161e-134
Nebl	5.96234e-138	0.643879	0.442	0.079	1.01712e-133
Prdx6	6.12828e-138	1.14631	1	0.983	1.04542e-133
Cdc42ep5	3.36036e-137	-0.626871	0.695	0.929	5.73243e-133
Entpd1	1.3557e-136	0.29992	0.231	0.002	2.31269e-132
Irx1	2.15813e-136	0.951012	0.708	0.323	3.68155e-132
Cers2	2.49564e-136	0.692734	0.801	0.39	4.25731e-132
Ihh	6.01851e-136	-0.769333	0.115	0.669	1.0267e-131
Adssl1	1.33818e-135	0.351103	0.291	0.017	2.2828e-131
Apbb1	1.54049e-135	0.626795	0.551	0.147	2.62793e-131
Ptges	2.24708e-135	0.390823	0.296	0.018	3.83329e-131
Kcne2	7.23599e-135	0.368321	0.262	0.009	1.23439e-130
S100a6	1.25751e-134	-0.701681	0.914	0.999	2.14519e-130
Bcam	2.77423e-134	0.895954	0.974	0.82	4.73256e-130
Spaar	3.10356e-134	0.284239	0.238	0.004	5.29437e-130
Rpl6	4.77215e-134	-0.416681	1	1	8.14081e-130
Smpd3	6.65411e-134	-0.713068	0.327	0.788	1.13512e-129
Rabac1	2.37699e-133	0.64493	0.994	0.949	4.0549e-129
Rasl12	4.44147e-133	0.272919	0.226	0.002	7.5767e-129
Adrb2	1.83829e-132	0.550177	0.338	0.035	3.13594e-128
Tmem116	5.80461e-132	0.361847	0.302	0.022	9.90209e-128
Atf3	3.08708e-131	-0.678886	0.971	0.995	5.26626e-127
Rps15a	3.14745e-131	-0.405458	1	1	5.36923e-127
Rps23	7.86667e-131	-0.383282	1	1	1.34198e-126
Rps13	1.9111e-130	-0.389489	1	1	3.26015e-126
Wdr45	5.74412e-130	0.829191	0.673	0.287	9.7989e-126
H2-Eb1	6.14278e-130	0.758136	0.476	0.095	1.0479e-125
Tox3	6.36471e-130	-0.724685	0.294	0.777	1.08576e-125
Rasgef1a	1.1306e-129	0.491216	0.432	0.077	1.92869e-125
Tmem163	2.63853e-129	0.278943	0.235	0.005	4.50107e-125
Bicc1	3.03578e-129	-0.74889	0.512	0.872	5.17874e-125
Vsig1	4.40501e-129	-0.705603	0.446	0.801	7.51451e-125
Cav1	1.35523e-128	0.644077	0.305	0.026	2.31188e-124
Map1lc3a	1.90729e-128	0.730085	0.96	0.749	3.25365e-124
Rpl8	1.91887e-128	-0.369292	1	1	3.27341e-124
Bend7	2.90766e-128	0.715238	0.668	0.271	4.96018e-124
C6	3.55181e-128	0.350691	0.222	0.002	6.05903e-124
Krt19	4.2594e-128	-0.786521	0.95	1	7.2661e-124
Adora2b	7.13116e-128	0.342378	0.271	0.015	1.2165e-123
Neurl3	7.75997e-128	-0.964424	0.501	0.819	1.32377e-123
Fads3	3.46501e-127	0.751611	0.612	0.216	5.91096e-123
Rai14	7.26057e-127	0.684885	0.709	0.317	1.23858e-122
Dcxr	7.34045e-127	1.00142	0.686	0.325	1.25221e-122
Mgst1	8.84304e-127	0.803757	0.982	0.773	1.50853e-122
Renbp	1.03419e-126	0.411513	0.359	0.045	1.76423e-122
Sema3a	1.02325e-125	0.432248	0.235	0.006	1.74556e-121
Cmtm7	2.1388e-125	-0.701621	0.425	0.807	3.64859e-121
Rpl10a	3.76896e-125	-0.436986	1	1	6.42947e-121
Areg	3.98102e-125	1.08089	0.751	0.32	6.79122e-121
Plpp2	9.75653e-125	-0.560163	0.794	0.953	1.66437e-120
Tceal9	1.21167e-124	0.697019	0.996	0.895	2.06698e-120
Sorcs2	1.30803e-124	0.330178	0.273	0.017	2.23136e-120
Dapk2	1.43252e-124	0.501173	0.366	0.051	2.44374e-120
Foxq1	1.44906e-124	-0.747022	0.863	0.978	2.47195e-120
Inka2	2.07919e-124	0.312527	0.247	0.009	3.54689e-120
Dapk1	3.23657e-124	0.729319	0.598	0.212	5.52127e-120
Bmp4	8.06165e-124	0.681107	0.622	0.221	1.37524e-119
Clic1	8.32e-124	-0.47124	0.996	1	1.41931e-119
Rps21	9.89211e-124	-0.390223	1	1	1.6875e-119
Myh7	1.0993e-123	1.07065	0.596	0.228	1.8753e-119
Tmod1	1.72175e-123	0.444843	0.305	0.028	2.93713e-119
Samhd1	4.1925e-123	0.684305	0.456	0.1	7.15199e-119
Spp1	7.95335e-123	-1.72193	0.788	0.924	1.35676e-118
Rpl27a	9.29028e-123	-0.35449	1	1	1.58483e-118
Htra1	1.02525e-122	0.349932	0.266	0.016	1.74897e-118
mt-Atp6	1.18042e-122	-0.440618	1	1	2.01367e-118
Rps27a	2.51182e-122	-0.363726	1	1	4.28492e-118
Rpl14	2.98265e-122	-0.381569	1	1	5.0881e-118
Rpl18a	2.07571e-121	-0.377714	1	1	3.54096e-117
Nfkbiz	2.60247e-121	-0.744298	0.708	0.915	4.43955e-117
Rps6	3.07465e-121	-0.412194	1	1	5.24505e-117
Arl6ip1	3.55324e-121	0.648616	0.982	0.85	6.06148e-117
Rps3a1	3.00537e-120	-0.37331	1	1	5.12687e-116
Ppic	4.69383e-120	0.776383	0.733	0.363	8.0072e-116
Hspb8	9.32448e-120	0.376649	0.284	0.022	1.59066e-115
Socs2	2.11381e-119	0.736435	0.839	0.487	3.60595e-115
Kank2	8.04178e-119	0.486357	0.464	0.105	1.37185e-114
Rpl29	1.28289e-118	-0.396099	1	1	2.18849e-114
Tshz2	1.76469e-118	-0.642701	0.479	0.833	3.01038e-114
Arhgap45	2.85996e-118	0.445501	0.359	0.052	4.87881e-114
Nav2	1.02418e-117	0.662025	0.598	0.212	1.74714e-113
Rpl39	5.34336e-117	-0.421194	1	1	9.11523e-113
P4ha1	1.49306e-116	0.528353	0.436	0.094	2.54701e-112
Retnla	2.25796e-116	2.09161	0.258	0.017	3.85186e-112
Sptssb	7.55157e-116	-0.935017	0.506	0.79	1.28822e-111
2210011C24Rik	1.02633e-115	0.559783	0.338	0.047	1.75082e-111
Rpl7a	1.37687e-115	-0.39455	1	1	2.3488e-111
Timp3	3.95528e-115	1.02925	0.683	0.285	6.74731e-111
Rnd3	3.27023e-114	-0.701489	0.209	0.683	5.57869e-110
Actg1	4.27367e-114	-0.437861	1	1	7.29046e-110
Pmaip1	4.74807e-114	-0.73197	0.162	0.652	8.09974e-110
Iyd	1.7271e-113	-0.761863	0.211	0.674	2.94625e-109
Icam1	2.10171e-113	0.74849	0.964	0.677	3.58531e-109
Tbc1d8	5.3179e-113	0.369254	0.35	0.052	9.0718e-109
Azin2	2.0986e-112	0.263104	0.213	0.006	3.58001e-108
Anxa6	2.125e-112	0.454593	0.399	0.076	3.62504e-108
Rpl26	3.41373e-112	-0.318465	1	1	5.82348e-108
Plxna4	1.35895e-111	0.320654	0.273	0.023	2.31823e-107
Slc44a2	2.4251e-111	0.671156	0.713	0.348	4.13697e-107
Cst8	3.6552e-111	0.390759	0.187	0.001	6.2354e-107
Galnt7	9.67186e-111	-0.675614	0.594	0.858	1.64992e-106
Cxadr	2.12636e-110	-0.563785	0.873	0.974	3.62736e-106
Wwp1	2.74754e-110	0.713008	0.663	0.307	4.68703e-106
Ank3	3.05665e-110	0.85117	0.715	0.412	5.21434e-106
Sdc1	3.07159e-110	0.57903	0.985	0.861	5.23983e-106
Rps14	7.50021e-110	-0.346812	1	1	1.27946e-105
Cyp2s1	1.22278e-109	-0.667916	0.442	0.819	2.08594e-105
Cystm1	1.40793e-109	-0.44283	0.992	1	2.40179e-105
Jun	3.49927e-109	-0.58905	0.994	0.998	5.9694e-105
Npm1	4.76212e-109	-0.475384	0.996	1	8.12371e-105
Fgf1	1.41474e-108	0.612196	0.512	0.156	2.4134e-104
Rpl23a	1.71793e-108	-0.362347	1	1	2.93061e-104
Kitl	1.85128e-108	-0.728254	0.262	0.699	3.15809e-104
Rpl18	2.25698e-108	-0.336121	1	1	3.85018e-104
Muc4	4.34951e-108	-0.68768	0.345	0.757	7.41983e-104
Dpysl2	7.34305e-108	0.511055	0.374	0.07	1.25265e-103
Malat1	9.318e-108	0.724846	1	1	1.58956e-103
Rps29	9.32797e-108	-0.318246	1	1	1.59126e-103
Ugt2b34	2.32325e-107	-0.670335	0.247	0.699	3.96323e-103
Cldn7	2.71783e-107	-0.500394	0.979	0.999	4.63635e-103
Slc3a2	7.22814e-107	0.623051	0.938	0.651	1.23305e-102
Rpl34	1.94074e-106	-0.36047	1	1	3.31071e-102
Kng2	4.43524e-106	0.611558	0.198	0.005	7.56608e-102
Dag1	4.49541e-106	0.707568	0.902	0.661	7.66872e-102
Pdcd4	5.8143e-106	-0.664148	0.292	0.727	9.91861e-102
Pgs1	1.26005e-105	0.623634	0.558	0.209	2.14952e-101
Tmem30a	3.78238e-105	0.633926	0.888	0.566	6.45237e-101
Nectin3	7.90759e-105	0.708976	0.622	0.264	1.34896e-100
Hbegf	1.4432e-104	-0.741517	0.906	0.986	2.46196e-100
Slc9a3r2	2.91216e-104	0.667589	0.665	0.322	4.96786e-100
Paqr5	6.10455e-104	-0.586774	0.368	0.747	1.04138e-99
Ppp3ca	6.19567e-104	0.68899	0.909	0.631	1.05692e-99
Serpinb1a	1.27227e-103	-0.722919	0.123	0.591	2.17037e-99
Rrbp1	2.04907e-103	-0.499139	0.97	0.998	3.49551e-99
Il18r1	2.30223e-103	0.682484	0.639	0.289	3.92738e-99
D230025D16Rik	2.31365e-103	0.508107	0.506	0.155	3.94685e-99
Ckmt1	3.01874e-103	-0.585881	0.733	0.899	5.14967e-99
Phactr1	3.64502e-103	0.32655	0.188	0.004	6.21804e-99
Msln	4.58614e-103	-0.935428	0.591	0.828	7.82349e-99
Rps10	1.06265e-102	-0.380712	0.997	1	1.81277e-98
Ttll7	2.48122e-102	0.564999	0.557	0.202	4.23272e-98
Sox4	6.70092e-102	-0.671354	0.918	0.982	1.14311e-97
Pls3	1.63431e-101	0.680066	0.785	0.424	2.78797e-97
Spink4	2.58425e-101	-1.28325	0.409	0.755	4.40848e-97
Maob	2.71203e-101	0.384404	0.324	0.05	4.62646e-97
Por	2.89353e-101	0.607268	0.838	0.502	4.93607e-97
Cecr2	3.25342e-101	0.254526	0.223	0.013	5.55001e-97
Epas1	3.50431e-101	0.820387	0.558	0.227	5.97801e-97
Bsg	5.87163e-101	0.541788	1	0.998	1.00164e-96
Ptgs1	4.04974e-100	0.652572	0.483	0.146	6.90845e-96
Atpif1	1.49265e-99	-0.389402	0.996	0.999	2.54632e-95
Ern2	3.09207e-99	-0.625371	0.305	0.717	5.27476e-95
Pabpc1	3.9105e-99	-0.444784	0.932	0.991	6.67093e-95
Col6a1	8.58095e-99	0.278169	0.169	0.001	1.46382e-94
Mvb12b	1.63001e-98	0.372591	0.346	0.062	2.78063e-94
Adgrf5	2.01417e-98	0.638224	0.76	0.471	3.43597e-94
Cd59a	2.39465e-98	0.385803	0.331	0.056	4.08504e-94
Siva1	3.56794e-98	0.643354	0.773	0.437	6.08655e-94
Pi4k2b	4.78967e-98	0.728435	0.788	0.497	8.17069e-94
Hdc	6.22415e-98	0.543622	0.231	0.018	1.06178e-93
Kcne3	8.60863e-98	-1.05596	0.255	0.667	1.46855e-93
mt-Co2	2.43653e-97	-0.342708	1	1	4.15648e-93
Fgfr2	2.54392e-97	0.658768	0.492	0.161	4.33967e-93
Rps26	5.3039e-97	-0.380352	1	1	9.04793e-93
Lurap1l	7.07273e-97	-0.616423	0.863	0.946	1.20654e-92
mt-Co1	8.10792e-97	-0.359182	0.999	1	1.38313e-92
Rdx	2.43095e-96	0.522906	0.726	0.358	4.14695e-92
Agr2	5.99504e-96	-1.17772	0.56	0.792	1.02269e-91
Slc15a2	1.3477e-95	0.447164	0.402	0.095	2.29904e-91
Adk	1.88336e-95	0.658212	0.56	0.232	3.21283e-91
Rpl37	1.91485e-95	-0.318243	1	1	3.26654e-91
Osbpl9	2.28175e-95	0.619798	0.677	0.346	3.89244e-91
Rnf128	3.13738e-95	-0.562819	0.285	0.708	5.35206e-91
Fhl2	4.95675e-95	-0.570333	0.179	0.618	8.45572e-91
Fau	5.49629e-95	-0.295707	1	1	9.37611e-91
Tmc5	6.78426e-95	-0.540003	0.127	0.568	1.15733e-90
Phldb2	1.90279e-94	0.605469	0.87	0.574	3.24597e-90
Frmd6	3.34001e-94	0.299216	0.265	0.031	5.69772e-90
Ndufa4	4.14334e-94	0.493837	0.983	0.875	7.06812e-90
Plin2	6.53797e-94	0.565899	0.669	0.31	1.11531e-89
Rpl35a	8.3976e-94	-0.302815	1	1	1.43255e-89
Rps17	1.83758e-92	-0.344863	0.999	1	3.13473e-88
Foxa2	2.60009e-92	0.503464	0.51	0.174	4.4355e-88
Zdhhc3	2.82638e-92	0.699758	0.823	0.532	4.82153e-88
Naxd	3.44544e-92	0.551811	0.942	0.721	5.87758e-88
Tcf4	4.91626e-92	-0.559881	0.339	0.745	8.38664e-88
Calr	2.62844e-91	-0.447966	0.994	0.999	4.48385e-87
mt-Co3	3.33234e-91	-0.344452	1	1	5.68463e-87
Slc9a4	4.48413e-91	-0.561863	0.193	0.621	7.64948e-87
Il33	6.833e-91	1.18377	0.435	0.133	1.16564e-86
Pamr1	9.20115e-91	-0.617653	0.14	0.585	1.56962e-86
Rps8	1.12987e-90	-0.288137	1	1	1.92745e-86
F2r	1.41514e-90	0.265064	0.202	0.013	2.41409e-86
Itih2	1.68811e-90	-0.633071	0.188	0.617	2.87975e-86
Eef1g	1.93402e-90	-0.372232	0.997	1	3.29924e-86
Nupr1	2.83006e-90	0.819208	0.508	0.161	4.82779e-86
Iqgap2	6.11202e-90	-0.555812	0.363	0.714	1.04265e-85
Inpp4b	8.14879e-90	0.259407	0.186	0.008	1.3901e-85
Atp8b1	8.72142e-90	-0.554593	0.299	0.691	1.48779e-85
Sox9	1.20414e-89	-0.69172	0.233	0.644	2.05414e-85
Plekha6	1.3043e-89	-0.514271	0.262	0.672	2.225e-85
Tspan2	1.42467e-89	0.579206	0.55	0.211	2.43035e-85
C3	4.52098e-89	0.627594	0.319	0.057	7.71234e-85
Itga1	4.71726e-89	-0.556408	0.303	0.693	8.04718e-85
AC100212.9	1.44824e-88	-0.572628	0.13	0.563	2.47056e-84
Tmem243	1.64068e-88	0.604138	0.526	0.206	2.79884e-84
Tspo	3.65353e-88	0.461181	0.999	0.996	6.23256e-84
Cd14	4.28538e-88	-0.548845	0.676	0.869	7.31043e-84
Tff1	5.12533e-88	-1.49327	0.783	0.901	8.7433e-84
Ubl3	7.7539e-88	0.525317	0.914	0.659	1.32274e-83
Pxdc1	1.79478e-87	0.561187	0.36	0.086	3.06172e-83
Syt7	1.21829e-86	0.2819	0.255	0.032	2.07827e-82
Scarb2	1.69565e-86	0.590247	0.654	0.342	2.89262e-82
Igsf9	1.97659e-86	-0.554198	0.306	0.683	3.37187e-82
Csgalnact2	2.61948e-86	0.451932	0.431	0.127	4.46857e-82
Gata5	3.35277e-86	-0.503256	0.118	0.537	5.71949e-82
Drap1	3.3703e-86	0.537603	0.963	0.823	5.74939e-82
Tnfaip1	4.81764e-86	0.526493	0.878	0.63	8.21842e-82
Slpi	1.84694e-85	0.514649	0.206	0.016	3.1507e-81
Bex3	1.88363e-85	0.563071	0.839	0.565	3.21329e-81
Magi3	3.18505e-85	0.709321	0.784	0.53	5.43338e-81
Gsap	7.09421e-85	0.554595	0.557	0.237	1.2102e-80
Zfp36l2	8.88019e-85	-0.6396	0.609	0.807	1.51487e-80
1110008L16Rik	1.36129e-84	-0.487879	0.147	0.564	2.32222e-80
Ltbp3	2.92007e-84	0.440643	0.436	0.131	4.98134e-80
Prdx1	4.84658e-84	-0.332029	1	1	8.26778e-80
Acsl1	5.21616e-84	-0.537271	0.227	0.635	8.89825e-80
Cdkn1a	9.27072e-84	0.799722	0.82	0.467	1.58149e-79
Rps15	9.71647e-84	-0.294181	1	1	1.65753e-79
Snx30	1.36497e-83	0.372345	0.359	0.084	2.32851e-79
Mfge8	1.39936e-83	-0.651373	0.543	0.804	2.38717e-79
Rac3	1.42014e-83	0.509378	0.464	0.158	2.42261e-79
Glul	6.40599e-83	-0.537514	0.881	0.963	1.0928e-78
Pla2g4a	9.39081e-83	-0.526432	0.212	0.613	1.60198e-78
Arap2	1.06235e-82	-0.518861	0.28	0.661	1.81226e-78
S100g	1.14597e-82	1.07288	0.416	0.127	1.9549e-78
Acot7	1.55226e-82	0.675491	0.349	0.085	2.64801e-78
Fam213a	2.63592e-82	-0.649303	0.722	0.889	4.49662e-78
Akr1c19	3.99109e-82	-0.494778	0.169	0.581	6.8084e-78
Hsp90ab1	6.85956e-82	-0.286025	1	1	1.17017e-77
H2-DMa	7.53518e-82	0.319113	0.288	0.048	1.28543e-77
Tmem45b	1.3226e-81	-0.487293	0.168	0.571	2.25622e-77
Gstt1	1.42491e-81	0.609281	0.716	0.461	2.43075e-77
Rab27b	1.66746e-81	-0.49774	0.709	0.861	2.84453e-77
Gmpr	1.91372e-81	0.298806	0.235	0.029	3.26461e-77
Gmds	1.98809e-81	-0.548688	0.432	0.74	3.39148e-77
Ces2g	2.57601e-81	-0.499114	0.118	0.519	4.39441e-77
Rpl36a	4.68175e-81	-0.370752	0.997	0.999	7.9866e-77
Dock11	6.22281e-81	-0.464098	0.082	0.481	1.06155e-76
Rgs17	9.46358e-81	-0.675414	0.341	0.672	1.61439e-76
Rps25	1.0238e-80	-0.304163	0.997	1	1.74649e-76
Marveld1	1.29712e-80	0.448336	0.454	0.15	2.21276e-76
Lrrc26	3.2043e-80	-0.507232	0.548	0.795	5.46621e-76
Itpr1	5.15743e-80	0.448637	0.472	0.166	8.79806e-76
Pik3ap1	9.26899e-80	-0.557187	0.186	0.589	1.5812e-75
Scp2	2.39277e-79	0.658667	0.99	0.919	4.08183e-75
Limd2	2.50695e-79	0.535091	0.598	0.289	4.2766e-75
Ppp1r9a	2.62772e-79	0.542795	0.579	0.262	4.48263e-75
Osbpl6	3.88608e-79	0.305828	0.248	0.035	6.62926e-75
Rps27	4.83288e-79	-0.291645	1	1	8.24442e-75
S100a10	7.45833e-79	-0.45869	0.957	0.997	1.27232e-74
Azin1	7.93815e-79	0.578604	0.747	0.465	1.35417e-74
Cebpa	8.76097e-79	0.495763	0.404	0.125	1.49453e-74
Serpinb9	9.75326e-79	0.859355	0.657	0.359	1.66381e-74
Nostrin	2.24936e-78	-0.427617	0.066	0.448	3.83719e-74
Hnf4a	2.78111e-78	-0.472171	0.231	0.612	4.7443e-74
Ppp1r14b	3.62641e-78	-0.439372	0.885	0.969	6.1863e-74
Dsg2	5.7702e-78	-0.514372	0.258	0.639	9.84339e-74
Cldn2	8.48718e-78	-0.734394	0.271	0.619	1.44783e-73
Acaca	9.67827e-78	0.434844	0.422	0.134	1.65102e-73
Rmdn2	1.13631e-77	0.34827	0.334	0.077	1.93843e-73
Lsr	1.14486e-77	-0.415981	0.848	0.947	1.95302e-73
Bcl2	3.09281e-77	-0.472236	0.161	0.564	5.27602e-73
Dsp	3.7248e-77	-0.501946	0.796	0.925	6.35414e-73
Mid1ip1	3.98697e-77	0.753659	0.806	0.545	6.80138e-73
Jpt1	4.48869e-77	-0.447436	0.819	0.936	7.65725e-73
Foxa1	5.42052e-77	-0.479462	0.562	0.806	9.24687e-73
Tspan3	8.74552e-77	-0.474033	0.414	0.745	1.4919e-72
Itih4	2.05336e-76	0.732788	0.227	0.03	3.50282e-72
Auts2	2.64547e-76	-0.449589	0.157	0.56	4.5129e-72
Bex4	5.36043e-76	0.429276	0.375	0.095	9.14437e-72
Ypel3	8.60434e-76	0.521705	0.922	0.711	1.46781e-71
Pfkfb4	2.31586e-75	0.265624	0.277	0.05	3.95062e-71
Rpl11	5.31142e-75	-0.263177	1	1	9.06075e-71
Cyp3a13	5.89562e-75	-0.563656	0.558	0.778	1.00573e-70
Ablim1	5.94374e-75	-0.479215	0.622	0.825	1.01394e-70
Mtfr1l	7.85375e-75	0.518904	0.698	0.402	1.33977e-70
Cyb5r3	3.09946e-74	0.490705	0.914	0.691	5.28737e-70
Rpl24	5.4358e-74	-0.268429	1	1	9.27293e-70
Marcks	7.30019e-74	-0.506603	0.468	0.735	1.24534e-69
Creg1	1.37621e-73	0.490602	0.892	0.665	2.34767e-69
Tmsb4x	2.07181e-73	0.454803	0.999	1	3.5343e-69
Rbp2	4.93184e-73	-0.628764	0.107	0.484	8.41323e-69
Cldn23	5.75434e-73	-0.47438	0.12	0.5	9.81633e-69
P2rx4	6.25377e-73	-0.513441	0.727	0.872	1.06683e-68
Lrig3	7.50474e-73	-0.426155	0.136	0.513	1.28023e-68
Atp6v0c	8.33186e-73	0.397538	0.997	0.978	1.42133e-68
Tmem37	1.46446e-72	0.55425	0.323	0.08	2.49821e-68
Krt23	1.46785e-72	-0.567508	0.812	0.891	2.504e-68
Ptms	2.13564e-72	0.476726	0.997	0.964	3.64318e-68
Mgst2	2.28281e-72	-0.485615	0.562	0.786	3.89425e-68
Mthfd1	2.69615e-72	0.443516	0.521	0.221	4.59936e-68
Mmp11	2.7853e-72	0.381157	0.285	0.059	4.75144e-68
Fads1	4.83775e-72	0.31414	0.22	0.03	8.25272e-68
Fam83e	7.07109e-72	-0.467249	0.276	0.631	1.20626e-67
Eps8	1.27706e-71	-0.494719	0.301	0.642	2.17854e-67
Ezr	1.31496e-71	-0.373805	0.992	0.999	2.24318e-67
Tmem54	1.74966e-71	-0.507178	0.425	0.698	2.98475e-67
Prdx2	2.12892e-71	-0.355552	0.983	0.994	3.63173e-67
Plekhb1	7.92562e-71	0.344399	0.396	0.122	1.35203e-66
Tgoln1	1.35297e-70	0.622818	0.988	0.904	2.30804e-66
Gsta1	1.39759e-70	-0.781487	0.569	0.777	2.38416e-66
Cyba	1.42762e-70	-0.426755	0.95	0.987	2.43537e-66
AU021092	1.51297e-70	0.606228	0.69	0.423	2.58098e-66
Gclc	4.29288e-70	0.866508	0.922	0.688	7.32323e-66
Tcf7l1	1.71339e-69	0.291094	0.276	0.055	2.92288e-65
Gm42418	2.15827e-69	0.481127	1	1	3.68179e-65
Kcnn4	2.91874e-69	-0.438069	0.114	0.473	4.97908e-65
Vtcn1	3.06127e-69	-0.391693	0.064	0.422	5.22222e-65
Nrbp2	3.79468e-69	0.357488	0.393	0.125	6.47335e-65
Klf4	5.95062e-69	-0.58284	0.788	0.922	1.01512e-64
Lamp1	6.66751e-69	0.370299	1	0.989	1.13741e-64
Pycard	7.31352e-69	-0.461358	0.241	0.616	1.24761e-64
Tmprss2	9.82896e-69	-0.463315	0.575	0.818	1.67672e-64
1110008P14Rik	1.00544e-68	0.448787	0.665	0.359	1.71518e-64
Oat	1.21002e-68	0.675949	0.589	0.328	2.06417e-64
Gpx2	2.45323e-68	-0.660477	0.453	0.71	4.18497e-64
Eef1d	2.57111e-68	-0.32577	0.978	0.997	4.38605e-64
Ech1	2.76798e-68	-0.376137	0.881	0.945	4.72189e-64
Frrs1	2.90242e-68	-0.412815	0.116	0.477	4.95124e-64
Lad1	2.93207e-68	-0.443528	0.227	0.581	5.00182e-64
Xbp1	6.13708e-68	-0.443251	0.738	0.866	1.04693e-63
Sftpd	8.122e-68	0.980747	0.997	0.997	1.38553e-63
Sytl2	8.30274e-68	-0.508526	0.38	0.681	1.41636e-63
Filip1l	1.06967e-67	-0.484346	0.283	0.65	1.82476e-63
Myo6	1.09934e-67	-0.457803	0.524	0.776	1.87536e-63
Kmt5a	1.35957e-67	-0.403569	0.82	0.928	2.31929e-63
Arf4	1.99457e-67	-0.362103	0.914	0.966	3.40253e-63
Frk	2.37374e-67	-0.451343	0.428	0.728	4.04936e-63
Map3k1	7.36346e-67	-0.444329	0.234	0.602	1.25613e-62
Rpl27	8.97995e-67	-0.256112	1	1	1.53189e-62
Gsn	9.66079e-67	0.643202	0.742	0.451	1.64803e-62
Fbxo32	1.29077e-66	-0.518329	0.22	0.588	2.20193e-62
Perp	1.72045e-66	-0.425257	0.614	0.814	2.93491e-62
Vsig2	2.39536e-66	-0.458771	0.672	0.85	4.08624e-62
Lima1	2.40763e-66	-0.412507	0.738	0.893	4.10717e-62
Rpl35	2.56956e-66	-0.305695	0.997	1	4.38342e-62
Fdx1	4.18006e-66	0.506465	0.726	0.461	7.13077e-62
Tes	4.3e-66	-0.433644	0.693	0.852	7.33537e-62
Crlf3	5.33047e-66	0.43422	0.334	0.094	9.09324e-62
Syt8	8.59642e-66	-0.471027	0.197	0.54	1.46646e-61
Eif6	1.16253e-65	-0.377615	0.868	0.957	1.98316e-61
Zfp618	1.37131e-65	-0.410948	0.119	0.477	2.33932e-61
Ccdc34	1.51754e-65	-0.484534	0.148	0.504	2.58877e-61
Lmo7	1.53077e-65	0.85538	0.953	0.936	2.61134e-61
H2-D1	1.98289e-65	0.484623	0.997	0.968	3.38261e-61
Chad	2.37836e-65	-0.474517	0.084	0.436	4.05724e-61
Aspa	2.55088e-65	-0.516812	0.13	0.482	4.35155e-61
Pla2g10	3.03174e-65	-0.452178	0.089	0.434	5.17185e-61
Inava	3.3594e-65	-0.441664	0.325	0.655	5.7308e-61
Brd7	3.46718e-65	0.512207	0.651	0.402	5.91466e-61
AA467197	3.92355e-65	-0.598593	0.428	0.667	6.69318e-61
Chsy1	4.39299e-65	0.294264	0.256	0.05	7.494e-61
Slc26a9	5.40454e-65	0.281114	0.262	0.053	9.21961e-61
Smim1	8.1877e-65	0.336334	0.388	0.125	1.39674e-60
Prss32	1.04764e-64	-0.458749	0.058	0.395	1.78717e-60
Kcnq1	1.27512e-64	-0.452183	0.224	0.581	2.17522e-60
Fam53b	1.55452e-64	0.485604	0.501	0.231	2.65186e-60
Degs2	1.60684e-64	-0.43766	0.306	0.631	2.7411e-60
Mlph	3.02029e-64	-0.452017	0.688	0.825	5.15231e-60
Inpp5b	3.91438e-64	0.285941	0.319	0.083	6.67754e-60
Mtch1	7.18086e-64	0.415168	0.974	0.84	1.22498e-59
Zc3h12a	1.56079e-63	-0.428122	0.202	0.568	2.66256e-59
Pttg1ip	1.77681e-63	-0.412314	0.803	0.907	3.03106e-59
Slk	2.27028e-63	-0.399316	0.821	0.928	3.87287e-59
Myrf	2.29823e-63	-0.376711	0.118	0.462	3.92055e-59
Avpi1	2.63347e-63	0.439018	0.956	0.782	4.49244e-59
Rhpn2	2.97268e-63	-0.413259	0.18	0.53	5.07109e-59
Selenow	3.24423e-63	0.434535	0.957	0.799	5.53432e-59
Fam3b	4.24422e-63	-0.40288	0.057	0.387	7.24021e-59
Ssr4	4.60567e-63	-0.37312	0.976	0.989	7.85681e-59
Bzw2	6.56637e-63	-0.431064	0.373	0.684	1.12016e-58
Lypd8	8.87715e-63	-1.0031	0.323	0.605	1.51435e-58
Rpl22	1.00785e-62	-0.277191	1	1	1.71929e-58
Mxd4	1.14181e-62	0.446936	0.852	0.632	1.94782e-58
Homer2	3.05922e-62	-0.458292	0.274	0.615	5.21872e-58
Cdk6	3.97576e-62	-0.465347	0.285	0.604	6.78224e-58
Pgc	4.462e-62	-0.831824	0.151	0.5	7.61172e-58
Grtp1	6.25333e-62	-0.367195	0.109	0.449	1.06675e-57
Cotl1	8.85717e-62	-0.461566	0.247	0.572	1.51094e-57
Fth1	1.24518e-61	0.309675	1	1	2.12415e-57
Ier2	1.2984e-61	-0.431357	0.978	0.999	2.21494e-57
Acoxl	1.53109e-61	0.272919	0.109	0.002	2.61188e-57
Tprgl	1.72027e-61	0.496099	0.727	0.456	2.93461e-57
Mdfic	1.95202e-61	0.308057	0.374	0.12	3.32994e-57
Higd1a	1.99455e-61	0.396451	0.856	0.572	3.4025e-57
Vil1	2.52351e-61	-0.382733	0.075	0.406	4.30486e-57
Gnas	6.23095e-61	0.313167	0.999	0.995	1.06294e-56
Arl14	1.24286e-60	-0.385387	0.084	0.418	2.1202e-56
S100a13	1.41193e-60	0.432519	0.864	0.619	2.40861e-56
Asph	1.44083e-60	-0.440834	0.374	0.688	2.45791e-56
Apob	1.55357e-60	-0.559466	0.112	0.451	2.65023e-56
Bok	2.01164e-60	-0.529628	0.334	0.612	3.43166e-56
Dusp5	2.15855e-60	-0.655616	0.404	0.652	3.68227e-56
Sdcbp2	2.83294e-60	-0.459937	0.54	0.755	4.83272e-56
Tsc22d1	4.52713e-60	-0.384654	0.975	0.991	7.72283e-56
Cyp2j6	5.45875e-60	-0.372014	0.116	0.453	9.31208e-56
Map1lc3b	9.21098e-60	0.376591	0.992	0.974	1.5713e-55
Tanc2	1.38836e-59	0.328245	0.382	0.129	2.3684e-55
Mgat4a	1.54451e-59	-0.440309	0.291	0.61	2.63479e-55
Ccdc141	2.28905e-59	0.48501	0.598	0.34	3.9049e-55
Gpa33	3.33084e-59	-0.390987	0.102	0.429	5.68208e-55
H2afj	3.4235e-59	0.442406	0.994	0.958	5.84015e-55
Add3	4.0031e-59	-0.387084	0.219	0.565	6.82889e-55
Edn1	5.07945e-59	-0.661437	0.112	0.448	8.66504e-55
Acly	6.07497e-59	0.509004	0.586	0.328	1.03633e-54
Tmsb10	7.11213e-59	-0.396077	0.92	0.989	1.21326e-54
Atp5c1	1.04017e-58	-0.296152	0.978	0.992	1.77443e-54
Crot	1.20983e-58	-0.4277	0.226	0.558	2.06384e-54
Eps8l3	1.28224e-58	-0.475041	0.298	0.586	2.18738e-54
Pllp	1.64864e-58	-0.410722	0.188	0.507	2.81241e-54
Kctd1	1.71766e-58	0.27759	0.284	0.071	2.93016e-54
Sh3yl1	2.13448e-58	-0.388763	0.281	0.615	3.64121e-54
Nectin1	2.98505e-58	0.397281	0.416	0.164	5.0922e-54
Rps28	3.27908e-58	-0.281216	0.999	1	5.59379e-54
Palld	3.35001e-58	-0.385346	0.101	0.424	5.71478e-54
Vegfa	3.58923e-58	0.585849	0.673	0.449	6.12286e-54
0610040J01Rik	8.30506e-58	-0.400223	0.409	0.712	1.41676e-53
Sec11c	1.10982e-57	-0.42031	0.888	0.94	1.89325e-53
Selenof	1.3535e-57	0.469821	0.974	0.925	2.30893e-53
Sptssa	2.31777e-57	-0.41064	0.593	0.804	3.95389e-53
Ywhaq	2.92142e-57	-0.330642	0.97	0.993	4.98366e-53
Foxa3	3.60621e-57	-0.374833	0.093	0.411	6.15183e-53
Tspan1	5.19315e-57	-0.561844	0.807	0.88	8.85899e-53
Ssx2ip	6.20828e-57	0.338523	0.367	0.126	1.05907e-52
H2-K1	1.27411e-56	0.473052	0.999	0.983	2.17351e-52
Ptgr1	1.5335e-56	-0.4084	0.794	0.897	2.61599e-52
Mgst3	2.60752e-56	-0.382037	0.796	0.916	4.44817e-52
Nr2f2	2.84075e-56	-0.410775	0.277	0.61	4.84603e-52
Ereg	3.40895e-56	0.279916	0.143	0.013	5.81533e-52
Cux1	4.27583e-56	0.462671	0.86	0.649	7.29413e-52
H2-DMb1	5.66788e-56	0.403584	0.422	0.166	9.66884e-52
Gem	6.61032e-56	0.255357	0.176	0.024	1.12765e-51
Far1	1.78626e-55	-0.391804	0.729	0.861	3.04718e-51
Abhd5	3.11314e-55	0.345981	0.371	0.131	5.31071e-51
Acsl5	3.58242e-55	0.418949	0.846	0.608	6.11125e-51
Tesc	6.40618e-55	-0.527146	0.194	0.505	1.09283e-50
Rpl36	6.53594e-55	-0.251725	1	1	1.11497e-50
Kif12	7.93192e-55	-0.356679	0.069	0.373	1.35311e-50
Abcc5	8.05996e-55	0.366575	0.373	0.137	1.37495e-50
Itgb4	8.67157e-55	-0.371917	0.209	0.53	1.47928e-50
Crim1	8.68899e-55	-0.361746	0.112	0.429	1.48226e-50
Tent5a	1.02538e-54	-0.490666	0.245	0.563	1.7492e-50
Pdia3	1.21119e-54	-0.315791	0.972	0.994	2.06616e-50
Mkrn2os	1.66937e-54	-0.349776	0.087	0.394	2.84777e-50
Pias1	1.83987e-54	0.444934	0.555	0.305	3.13864e-50
Ift20	1.89745e-54	0.398183	0.954	0.768	3.23686e-50
Ndufc2	2.82459e-54	0.394448	0.956	0.857	4.81846e-50
Foxp2	3.16358e-54	0.355293	0.395	0.148	5.39676e-50
Capsl	3.34579e-54	-0.361961	0.129	0.448	5.70759e-50
Pcnt	5.32266e-54	0.460534	0.573	0.325	9.07993e-50
Smim24	7.97944e-54	-0.37139	0.078	0.377	1.36121e-49
Marcksl1	1.36014e-53	-0.400298	0.199	0.525	2.32027e-49
Evl	1.60136e-53	-0.335258	0.064	0.361	2.73176e-49
Cd82	3.11116e-53	-0.379519	0.398	0.676	5.30733e-49
Tmem110	3.76701e-53	0.344186	0.4	0.16	6.42613e-49
Arpc1b	4.02603e-53	-0.296832	0.985	0.997	6.868e-49
Alad	5.39854e-53	0.432698	0.687	0.445	9.20936e-49
Snx18	6.15926e-53	0.370025	0.422	0.175	1.05071e-48
Plaur	1.53112e-52	-0.515465	0.494	0.681	2.61194e-48
Akap13	2.01225e-52	0.471812	0.956	0.904	3.4327e-48
Zfp36	2.8516e-52	-0.451997	0.921	0.938	4.86454e-48
Pitpnm2	3.59142e-52	0.281219	0.267	0.071	6.1266e-48
Cadm1	9.2166e-52	0.439094	0.805	0.593	1.57226e-47
Slc1a1	1.13403e-51	0.282018	0.273	0.075	1.93454e-47
Gstm5	1.44899e-51	-0.314441	0.076	0.369	2.47184e-47
Mpzl3	1.80553e-51	-0.387653	0.176	0.489	3.08005e-47
Tra2a	2.77662e-51	0.42099	0.936	0.808	4.73663e-47
Lrrc31	2.95556e-51	-0.338404	0.08	0.377	5.04189e-47
Srp14	5.48593e-51	0.359121	0.979	0.92	9.35845e-47
Cib1	6.10331e-51	-0.342817	0.781	0.886	1.04116e-46
Tspan13	7.57283e-51	-0.420726	0.601	0.765	1.29185e-46
Comtd1	7.65907e-51	-0.32734	0.107	0.407	1.30656e-46
Ifngr1	1.16412e-50	-0.393842	0.633	0.803	1.98588e-46
Tcf7l2	1.20612e-50	-0.387915	0.335	0.629	2.05752e-46
Piezo1	1.44312e-50	0.255813	0.269	0.073	2.46182e-46
Junb	1.62446e-50	-0.334538	0.992	0.998	2.77117e-46
Mal2	1.63888e-50	0.436111	0.935	0.782	2.79577e-46
Apoc1	1.73478e-50	0.276689	0.133	0.013	2.95935e-46
Pon3	1.79387e-50	0.410561	0.479	0.243	3.06016e-46
Rab12	2.15326e-50	0.484578	0.501	0.271	3.67325e-46
Crip1	3.40554e-50	-0.607711	0.87	0.955	5.8095e-46
Galnt4	3.58692e-50	-0.349337	0.145	0.449	6.11892e-46
Selenop	3.80115e-50	-0.361179	0.938	0.96	6.48439e-46
Serpinb5	3.80642e-50	-0.34662	0.136	0.436	6.49336e-46
Serinc3	4.00647e-50	0.361239	0.821	0.573	6.83463e-46
Cdkn1c	4.55793e-50	0.346816	0.252	0.065	7.77537e-46
Coro2a	4.77416e-50	-0.32616	0.094	0.393	8.14424e-46
Cxcl5	4.89594e-50	-1.01696	0.202	0.489	8.35198e-46
Plscr1	2.17821e-49	-0.390665	0.299	0.586	3.71581e-45
Rnpep	2.32205e-49	-0.349417	0.695	0.828	3.96119e-45
Sema3c	4.31953e-49	-0.431126	0.501	0.708	7.36869e-45
Sectm1b	5.71005e-49	-0.431606	0.064	0.342	9.74078e-45
Anxa10	5.9072e-49	-0.518854	0.508	0.686	1.00771e-44
Mbnl1	9.11539e-49	0.418738	0.927	0.779	1.55499e-44
Eif1	9.82337e-49	0.276701	1	1	1.67577e-44
Hnrnpf	1.04969e-48	-0.285277	0.97	0.991	1.79066e-44
Samd9l	1.33219e-48	-0.394941	0.472	0.721	2.27258e-44
Wwc1	1.71307e-48	0.38545	0.892	0.699	2.92233e-44
Eepd1	2.28555e-48	-0.3099	0.086	0.369	3.89891e-44
Eef2k	2.81771e-48	-0.30646	0.094	0.382	4.80673e-44
Lgr4	3.10422e-48	-0.31718	0.096	0.383	5.29549e-44
Svil	4.41566e-48	0.433215	0.485	0.249	7.53267e-44
Clint1	5.47023e-48	-0.356852	0.802	0.873	9.33166e-44
Fmnl2	5.56342e-48	-0.304363	0.072	0.348	9.49065e-44
H3f3b	5.7124e-48	-0.271564	1	1	9.74479e-44
Usp33	7.72729e-48	0.393117	0.503	0.267	1.3182e-43
2900026A02Rik	8.39468e-48	-0.38268	0.342	0.637	1.43205e-43
Paip2	1.07512e-47	0.380736	0.916	0.741	1.83404e-43
Wnt4	1.14702e-47	-0.4667	0.101	0.39	1.95669e-43
Cds1	1.66439e-47	0.316166	0.346	0.129	2.83928e-43
Palmd	2.06023e-47	-0.377917	0.072	0.346	3.51455e-43
Ccn1	2.10107e-47	-0.599988	0.503	0.729	3.58421e-43
Muc1	2.80688e-47	-0.27565	0.994	1	4.78826e-43
Gprin3	2.89262e-47	0.413505	0.557	0.321	4.93452e-43
Ldhb	4.66436e-47	0.489909	0.481	0.239	7.95694e-43
Tm4sf4	4.96973e-47	-0.694624	0.079	0.358	8.47786e-43
Celf2	5.67353e-47	0.383331	0.445	0.208	9.67847e-43
Iffo2	6.52171e-47	-0.363265	0.109	0.4	1.11254e-42
Gjb1	6.57474e-47	-0.362764	0.202	0.486	1.12158e-42
Tmbim6	6.78447e-47	0.271985	1	0.996	1.15736e-42
Kcnj15	7.48298e-47	0.579404	0.591	0.385	1.27652e-42
Myl12a	8.69789e-47	0.507508	0.96	0.921	1.48377e-42
Macf1	9.47033e-47	0.456017	0.802	0.6	1.61554e-42
Adam28	1.77776e-46	-0.328583	0.083	0.355	3.03269e-42
Hnrnpa0	2.43804e-46	-0.285282	0.938	0.976	4.15905e-42
B4galt6	3.64196e-46	-0.357702	0.259	0.536	6.21282e-42
Parm1	3.75731e-46	-0.406176	0.392	0.633	6.4096e-42
Lama3	3.83171e-46	0.362945	0.252	0.072	6.53652e-42
Rhoa	4.0775e-46	0.473484	0.997	0.988	6.9558e-42
Mtus1	4.48146e-46	-0.328191	0.292	0.603	7.64493e-42
Tjp3	6.86951e-46	-0.355869	0.46	0.712	1.17187e-41
Pdlim1	7.2672e-46	-0.372826	0.748	0.847	1.23971e-41
5330417C22Rik	7.96207e-46	-0.380874	0.316	0.632	1.35825e-41
Actr3	8.94042e-46	-0.303537	0.896	0.95	1.52515e-41
S1pr2	1.66881e-45	0.259047	0.237	0.063	2.84682e-41
Atp6v0a1	1.73952e-45	0.346967	0.409	0.183	2.96745e-41
Tpd52	1.81324e-45	-0.297698	0.849	0.931	3.0932e-41
Snx10	1.8647e-45	-0.334011	0.191	0.485	3.18099e-41
Myo1b	2.12745e-45	0.652916	0.688	0.518	3.62922e-41
Cdc42ep1	3.61422e-45	-0.322119	0.235	0.545	6.1655e-41
Fos	4.55387e-45	-0.290683	0.989	0.998	7.76844e-41
Pax9	6.98591e-45	-0.323428	0.06	0.319	1.19173e-40
Ppp2r5a	7.31699e-45	0.377095	0.705	0.505	1.24821e-40
Cox7a2l	7.47592e-45	-0.250432	0.994	0.999	1.27532e-40
Mme	1.38502e-44	0.464057	0.172	0.032	2.3627e-40
Arhgef26	1.62778e-44	0.512979	0.478	0.263	2.77683e-40
Gkn3	3.39346e-44	-1.31426	0.512	0.645	5.78891e-40
Duox2	3.58212e-44	-0.40964	0.093	0.363	6.11074e-40
Atp6v1a	3.87523e-44	0.382028	0.629	0.405	6.61075e-40
Tmprss4	4.77693e-44	-0.333319	0.323	0.616	8.14897e-40
Efnb2	6.26589e-44	-0.324029	0.143	0.428	1.0689e-39
Sult1d1	9.89842e-44	-0.4163	0.075	0.333	1.68857e-39
Plat	1.42614e-43	-0.610197	0.104	0.367	2.43285e-39
Sh3pxd2b	1.52159e-43	-0.287588	0.083	0.347	2.59568e-39
Qsox1	1.65299e-43	-0.372382	0.425	0.654	2.81983e-39
Tmem98	1.8568e-43	-0.307824	0.23	0.521	3.16752e-39
Tubb2b	1.86323e-43	-0.440295	0.079	0.34	3.17848e-39
Lbp	2.14344e-43	-0.383268	0.814	0.881	3.65649e-39
Myl6	2.34521e-43	0.449258	1	1	4.00069e-39
Cox5a	2.65108e-43	-0.250129	0.99	0.997	4.52248e-39
Mpzl2	2.71371e-43	-0.338142	0.253	0.539	4.62931e-39
Tnf	2.71998e-43	-0.369494	0.071	0.331	4.64001e-39
Ankrd40	4.49975e-43	0.402461	0.572	0.361	7.67612e-39
Hspd1	4.56635e-43	-0.329351	0.875	0.931	7.78974e-39
Atf5	5.35423e-43	0.738889	0.356	0.155	9.13379e-39
Hras	5.52941e-43	0.382362	0.907	0.766	9.43261e-39
Acot2	6.27657e-43	0.251306	0.241	0.068	1.07072e-38
Vps37b	6.83897e-43	-0.345375	0.287	0.558	1.16666e-38
Klf3	8.13497e-43	-0.368591	0.884	0.918	1.38775e-38
Pir	1.08731e-42	-0.376336	0.283	0.538	1.85484e-38
Itgb1	1.12219e-42	0.3822	0.942	0.86	1.91434e-38
Rnase4	1.18075e-42	0.613868	0.961	0.862	2.01424e-38
Fer1l4	1.49117e-42	-0.296785	0.073	0.331	2.54379e-38
Tmem63b	1.62789e-42	0.382362	0.771	0.564	2.77702e-38
Id2	2.18974e-42	-0.474718	0.888	0.913	3.73548e-38
Rdh10	2.39645e-42	-0.506696	0.421	0.637	4.08811e-38
Hes1	2.63882e-42	0.492336	0.645	0.411	4.50157e-38
Tln1	3.51682e-42	0.417522	0.771	0.557	5.99935e-38
Tead1	4.11598e-42	0.473253	0.537	0.326	7.02145e-38
Acer2	4.86052e-42	-0.290853	0.137	0.411	8.29156e-38
Tuba1b	5.81024e-42	0.273627	0.924	0.695	9.9117e-38
Trp53inp2	5.87749e-42	0.408118	0.497	0.287	1.00264e-37
Gsdmd	7.43348e-42	-0.334952	0.343	0.604	1.26808e-37
Ier3	8.58638e-42	-0.481555	0.864	0.932	1.46475e-37
Ifi27l2b	8.93199e-42	-0.424776	0.306	0.54	1.52371e-37
Set	1.65155e-41	-0.277453	0.949	0.975	2.81738e-37
Cybrd1	1.95094e-41	-0.335031	0.102	0.362	3.32811e-37
Echdc2	2.02316e-41	-0.322257	0.266	0.541	3.45131e-37
Edn3	2.51181e-41	0.258779	0.244	0.072	4.28489e-37
Tox	2.61217e-41	-0.294931	0.158	0.431	4.45609e-37
Elovl5	3.21545e-41	0.388539	0.533	0.32	5.48523e-37
Slc25a51	3.45042e-41	0.416652	0.679	0.503	5.88608e-37
Zbtb7a	3.60864e-41	-0.296795	0.846	0.924	6.15598e-37
Capg	3.86245e-41	-0.357311	0.651	0.782	6.58896e-37
Mrps24	3.92808e-41	-0.261311	0.935	0.969	6.70091e-37
Ddah1	4.20332e-41	-0.323513	0.076	0.326	7.17044e-37
Upp1	4.30036e-41	-0.27492	0.062	0.308	7.33599e-37
Fam20c	4.96404e-41	-0.296762	0.09	0.344	8.46816e-37
Akr1c12	5.03237e-41	-0.318811	0.06	0.303	8.58472e-37
Klf6	6.9731e-41	-0.361988	0.979	0.994	1.18954e-36
Sbno2	7.15845e-41	-0.555421	0.623	0.752	1.22116e-36
Ppp2ca	8.52664e-41	-0.333422	0.928	0.951	1.45456e-36
Slc45a3	9.2969e-41	-0.293977	0.136	0.408	1.58596e-36
Rock1	1.11752e-40	0.34374	0.965	0.893	1.90637e-36
Suclg2	1.14734e-40	-0.300223	0.223	0.508	1.95725e-36
Pdlim5	1.34109e-40	-0.33465	0.375	0.626	2.28777e-36
Arhgap29	1.42168e-40	0.283991	0.377	0.162	2.42525e-36
Rps6ka1	1.52852e-40	-0.305573	0.23	0.505	2.6075e-36
Ubc	1.9265e-40	-0.306168	0.999	1	3.28641e-36
Gprc5a	1.95624e-40	0.533957	0.916	0.775	3.33716e-36
Lgals2	2.00345e-40	-0.35176	0.062	0.307	3.41768e-36
Atp6v0b	2.10888e-40	0.275928	0.986	0.933	3.59753e-36
Btg3	2.52135e-40	0.41235	0.636	0.428	4.30117e-36
Fam129b	2.61419e-40	0.353192	0.639	0.421	4.45954e-36
Arl4c	2.75412e-40	0.571107	0.756	0.572	4.69825e-36
Tstd1	2.8729e-40	-0.32734	0.08	0.335	4.90088e-36
Pla2g12a	2.93078e-40	-0.304825	0.184	0.454	4.99961e-36
Tmem147	2.94829e-40	-0.308253	0.789	0.869	5.02949e-36
Akt2	4.15462e-40	0.319341	0.435	0.213	7.08736e-36
Lcor	5.0933e-40	-0.324585	0.307	0.582	8.68866e-36
Spdef	8.41433e-40	-0.290655	0.079	0.328	1.4354e-35
2810459M11Rik	8.64593e-40	-0.268564	0.08	0.327	1.47491e-35
Egr1	8.72644e-40	-0.29512	0.968	0.996	1.48864e-35
Tmem176a	9.1552e-40	0.474281	0.985	0.959	1.56179e-35
Casp6	1.08745e-39	-0.309041	0.26	0.546	1.85508e-35
Scpep1	1.1641e-39	-0.292609	0.216	0.492	1.98585e-35
Apex1	1.18384e-39	-0.299819	0.198	0.471	2.01951e-35
Fgfbp1	1.23975e-39	0.266101	0.266	0.087	2.11489e-35
Amot	1.29324e-39	-0.275219	0.089	0.336	2.20614e-35
Ptp4a3	1.32313e-39	0.259187	0.285	0.101	2.25712e-35
Iah1	1.37226e-39	0.430157	0.695	0.538	2.34094e-35
Syt16	1.60143e-39	-0.273046	0.068	0.308	2.73188e-35
Gm26532	1.86802e-39	0.675418	0.855	0.662	3.18666e-35
Cx3cl1	1.87342e-39	-0.266957	0.114	0.374	3.19587e-35
Slc35f5	2.53296e-39	-0.313281	0.226	0.492	4.32098e-35
Gprc5c	3.31925e-39	-0.258698	0.112	0.373	5.66231e-35
Ube2e3	3.67321e-39	-0.312066	0.68	0.807	6.26613e-35
Usp53	3.70274e-39	-0.334828	0.256	0.526	6.31651e-35
Tlnrd1	4.1116e-39	-0.304923	0.206	0.475	7.01398e-35
Fmn1	4.27561e-39	-0.288425	0.119	0.372	7.29376e-35
Nceh1	4.74958e-39	0.507389	0.629	0.472	8.1023e-35
Tmc4	4.86987e-39	-0.264731	0.889	0.954	8.30751e-35
Ptprk	4.90538e-39	-0.322043	0.616	0.774	8.36808e-35
Tmem51	5.07496e-39	-0.280217	0.173	0.446	8.65738e-35
Atp10b	5.81132e-39	-0.27877	0.062	0.299	9.91352e-35
Lars2	6.89491e-39	0.441986	0.979	0.874	1.1762e-34
Ezh2	7.07453e-39	-0.295768	0.136	0.397	1.20684e-34
Rab5if	1.21714e-38	0.312862	0.956	0.846	2.07632e-34
Eif3i	1.27344e-38	-0.264006	0.902	0.933	2.17236e-34
Lgals3bp	1.28986e-38	-0.389187	0.449	0.633	2.20037e-34
Myadm	1.31283e-38	-0.327023	0.406	0.661	2.23956e-34
Clec2d	1.51392e-38	-0.297505	0.136	0.395	2.5826e-34
Ambp	1.58348e-38	-0.99838	0.249	0.482	2.70126e-34
Ppip5k2	1.61287e-38	-0.307102	0.212	0.475	2.7514e-34
Atp1a1	1.69011e-38	-0.251764	0.999	0.997	2.88315e-34
Tmed3	1.75056e-38	-0.347576	0.792	0.853	2.98628e-34
Mpp7	1.95219e-38	0.411471	0.601	0.419	3.33024e-34
Trp53i11	1.95695e-38	-0.290107	0.193	0.47	3.33835e-34
Rab15	2.07539e-38	0.259095	0.332	0.134	3.54041e-34
Gsta3	2.13621e-38	-0.386841	0.576	0.751	3.64417e-34
Myo1a	2.45327e-38	-0.276743	0.04	0.264	4.18503e-34
Rap2a	2.47763e-38	0.320158	0.353	0.156	4.22659e-34
Exosc7	3.34086e-38	0.421059	0.74	0.571	5.69918e-34
Itga2	3.55892e-38	-0.329082	0.18	0.429	6.07116e-34
Card10	3.56858e-38	-0.268975	0.116	0.365	6.08764e-34
Gar1	3.9329e-38	-0.291759	0.18	0.445	6.70914e-34
2310007B03Rik	4.00735e-38	0.3234	0.273	0.098	6.83614e-34
Sphk1	7.47005e-38	0.415143	0.36	0.167	1.27432e-33
Lamp2	9.88492e-38	0.311387	0.939	0.813	1.68627e-33
Vill	1.00452e-37	-0.330906	0.421	0.646	1.71361e-33
Rhou	1.04845e-37	-0.348369	0.274	0.535	1.78856e-33
Tfrc	1.10173e-37	0.359867	0.367	0.168	1.87944e-33
H2afv	1.13812e-37	-0.307027	0.91	0.94	1.94151e-33
Ikbkb	1.17402e-37	-0.311875	0.288	0.553	2.00277e-33
Abracl	1.29759e-37	-0.292654	0.767	0.862	2.21356e-33
Malt1	1.32509e-37	0.688762	0.439	0.241	2.26047e-33
Shisa5	1.67158e-37	-0.274551	0.906	0.951	2.85155e-33
Hspe1	2.50751e-37	-0.271506	0.953	0.968	4.27756e-33
Mal	2.53456e-37	-0.421404	0.947	0.966	4.32371e-33
Plcb1	2.81231e-37	-0.253109	0.061	0.29	4.79752e-33
Atxn10	4.01253e-37	0.32318	0.896	0.729	6.84497e-33
Tubb5	4.33359e-37	-0.388317	0.914	0.945	7.39268e-33
Thbs3	4.63787e-37	0.289544	0.252	0.085	7.91174e-33
Npm3	7.14856e-37	-0.310808	0.295	0.547	1.21947e-32
St14	8.24823e-37	-0.295158	0.618	0.768	1.40707e-32
Mical3	8.46696e-37	-0.252668	0.087	0.328	1.44438e-32
Slc7a1	1.00508e-36	-0.287978	0.173	0.435	1.71456e-32
Cfap69	1.41065e-36	-0.262391	0.084	0.32	2.40643e-32
Tm4sf5	1.53381e-36	-0.307968	0.032	0.242	2.61653e-32
Nrip1	1.57309e-36	-0.330694	0.658	0.771	2.68354e-32
Fosb	1.71468e-36	-0.411018	0.938	0.963	2.92507e-32
Reep5	1.9282e-36	0.309306	0.939	0.809	3.28932e-32
Slc25a4	1.93801e-36	0.349473	0.85	0.658	3.30604e-32
Pdia5	2.07664e-36	-0.277646	0.101	0.337	3.54254e-32
Serinc2	2.08056e-36	-0.303899	0.443	0.665	3.54922e-32
Gm15848	2.97186e-36	-0.443281	0.1	0.341	5.0697e-32
Gstk1	3.3018e-36	0.322124	0.373	0.177	5.63255e-32
Aldh3b1	3.55636e-36	0.291352	0.301	0.119	6.06679e-32
Kcnk1	3.59913e-36	-0.334201	0.533	0.712	6.13975e-32
Smpd1	3.65885e-36	0.347112	0.512	0.315	6.24164e-32
Klf10	5.08287e-36	-0.304093	0.169	0.426	8.67087e-32
Creb3l1	5.16386e-36	-0.303413	0.309	0.581	8.80902e-32
Enc1	5.56044e-36	-0.314313	0.141	0.399	9.48556e-32
Cebpd	5.66853e-36	0.463743	0.752	0.531	9.66994e-32
Hspg2	6.19623e-36	0.319939	0.374	0.18	1.05702e-31
Pmvk	6.78818e-36	0.639174	0.499	0.315	1.158e-31
Rnf145	8.66057e-36	0.283772	0.334	0.146	1.47741e-31
Clmn	1.07833e-35	-0.333053	0.485	0.708	1.83953e-31
Apbb2	1.27162e-35	0.295534	0.436	0.231	2.16926e-31
Id1	1.35434e-35	-0.477917	0.891	0.929	2.31036e-31
Ddt	1.71033e-35	0.316658	0.773	0.555	2.91764e-31
Ecscr	1.84862e-35	-0.303162	0.083	0.312	3.15356e-31
Smad1	2.61922e-35	-0.284283	0.263	0.532	4.46813e-31
Impdh2	4.26522e-35	-0.322191	0.456	0.66	7.27604e-31
Pcdh1	4.30936e-35	-0.260361	0.115	0.349	7.35134e-31
Sestd1	4.67581e-35	-0.279175	0.256	0.525	7.97647e-31
Ube2s	4.74069e-35	0.323047	0.916	0.814	8.08714e-31
Fam174b	4.84984e-35	0.537954	0.651	0.492	8.27334e-31
Apoa1	7.06331e-35	-0.377896	0.055	0.274	1.20493e-30
Dusp7	7.78629e-35	0.329481	0.32	0.141	1.32826e-30
Phb2	8.99923e-35	-0.273053	0.827	0.88	1.53518e-30
Mat2a	9.3158e-35	-0.273142	0.916	0.942	1.58918e-30
Grb14	9.73239e-35	0.422279	0.572	0.39	1.66025e-30
Mllt3	1.41312e-34	-0.293846	0.33	0.577	2.41064e-30
Bcas1	1.90851e-34	-0.339413	0.165	0.394	3.25573e-30
Ubald2	1.91133e-34	-0.306322	0.765	0.849	3.26054e-30
C1qbp	2.06784e-34	-0.32348	0.666	0.753	3.52753e-30
Eva1b	2.77745e-34	0.366632	0.45	0.257	4.73805e-30
Nr3c1	2.80413e-34	0.326126	0.596	0.403	4.78357e-30
Slc31a1	2.86761e-34	0.350115	0.418	0.224	4.89186e-30
Mia3	2.97451e-34	-0.333888	0.555	0.712	5.07422e-30
Ehf	3.29216e-34	-0.292074	0.6	0.775	5.6161e-30
Hnrnpab	3.98442e-34	-0.258439	0.906	0.94	6.79702e-30
Mboat1	4.03169e-34	-0.280261	0.242	0.483	6.87767e-30
Crb3	4.26679e-34	0.342773	0.907	0.787	7.27872e-30
Gm19990	4.33702e-34	-0.409872	0.465	0.668	7.39852e-30
Golim4	5.79905e-34	-0.285874	0.266	0.531	9.8926e-30
Sdf2l1	7.52572e-34	-0.285906	0.139	0.375	1.28381e-29
Hid1	9.34029e-34	-0.270859	0.217	0.469	1.59336e-29
Polr1c	1.05073e-33	0.323641	0.657	0.484	1.79245e-29
Npnt	1.38765e-33	0.418242	0.69	0.519	2.36719e-29
Ak3	1.48941e-33	-0.287332	0.693	0.795	2.54078e-29
Nipsnap1	1.84621e-33	-0.261203	0.283	0.539	3.14945e-29
Thbs1	1.93566e-33	-0.64142	0.614	0.723	3.30204e-29
Camk2n1	1.94686e-33	-0.319694	0.92	0.925	3.32115e-29
Pcyt1a	1.9569e-33	0.316578	0.449	0.254	3.33828e-29
Glb1	2.4799e-33	-0.257409	0.165	0.405	4.23045e-29
Fuca1	2.56781e-33	-0.26386	0.861	0.913	4.38043e-29
Sod1	2.97899e-33	0.29052	0.827	0.611	5.08186e-29
Galnt18	2.98761e-33	0.330331	0.278	0.114	5.09657e-29
Akr1c13	3.07693e-33	-0.398989	0.253	0.47	5.24893e-29
Ralbp1	3.33645e-33	0.333212	0.932	0.836	5.69165e-29
Npc1	3.3692e-33	0.335959	0.488	0.289	5.74751e-29
Nbeal2	3.70893e-33	-0.268817	0.197	0.449	6.32707e-29
Smim15	6.38954e-33	-0.286587	0.367	0.602	1.08999e-28
Tmem245	7.2556e-33	0.353953	0.564	0.383	1.23773e-28
Kdelr2	7.63804e-33	-0.295069	0.698	0.793	1.30297e-28
Pld1	7.82858e-33	-0.287416	0.227	0.474	1.33548e-28
Duoxa2	8.29577e-33	-0.350116	0.068	0.28	1.41518e-28
Cdkn2b	9.50483e-33	0.453647	0.418	0.24	1.62143e-28
Mettl1	1.35405e-32	-0.264434	0.176	0.422	2.30988e-28
Rab3d	1.36125e-32	-0.314746	0.53	0.697	2.32216e-28
Vnn1	1.38177e-32	-0.455955	0.503	0.65	2.35717e-28
Nfe2l1	1.48191e-32	0.308942	0.679	0.484	2.52799e-28
St3gal5	1.59354e-32	0.360613	0.532	0.345	2.71842e-28
Acp5	1.76992e-32	-0.318166	0.262	0.482	3.01931e-28
Prr13	2.25203e-32	-0.274035	0.889	0.944	3.84174e-28
Pgm2l1	2.31344e-32	-0.271638	0.1	0.321	3.9465e-28
Gk	2.37714e-32	-0.266211	0.245	0.49	4.05517e-28
Pak1	2.58406e-32	-0.280078	0.281	0.527	4.40815e-28
Ldha	3.07852e-32	0.270845	0.965	0.901	5.25165e-28
Galnt3	4.8297e-32	-0.283622	0.295	0.527	8.23899e-28
Mettl7b	5.38187e-32	-0.251798	0.051	0.251	9.18094e-28
Gabrp	6.53468e-32	-0.310266	0.091	0.305	1.11475e-27
Fcgbp	6.92703e-32	-0.334037	0.062	0.268	1.18168e-27
Arfgap3	7.79153e-32	-0.261873	0.193	0.432	1.32916e-27
Scgb1a1	8.49251e-32	3.73048	0.287	0.125	1.44874e-27
Ocln	8.91676e-32	-0.293722	0.461	0.669	1.52111e-27
Asap2	1.59562e-31	-0.284189	0.298	0.527	2.72198e-27
Atf4	1.73918e-31	-0.270741	0.882	0.927	2.96686e-27
Oasl1	1.76808e-31	-0.351435	0.071	0.274	3.01617e-27
Dock9	1.97151e-31	0.259597	0.292	0.124	3.36321e-27
Pgap1	2.6745e-31	-0.286447	0.301	0.53	4.56243e-27
Arid5a	2.84058e-31	-0.291077	0.226	0.473	4.84574e-27
Lgals3	3.21431e-31	0.565451	0.86	0.812	5.48329e-27
Eif4h	4.18197e-31	0.297392	0.975	0.871	7.13403e-27
Gcc2	5.60532e-31	-0.289916	0.742	0.828	9.56211e-27
Tgif1	6.00574e-31	-0.305352	0.457	0.648	1.02452e-26
Mrpl50	6.17917e-31	-0.282729	0.334	0.558	1.0541e-26
Wnk1	7.05474e-31	0.307227	0.885	0.752	1.20347e-26
Itga6	7.08309e-31	-0.313776	0.677	0.772	1.20831e-26
Prep	7.74442e-31	0.331125	0.411	0.23	1.32112e-26
Tmem42	8.28457e-31	0.276591	0.353	0.172	1.41326e-26
Slc44a4	8.95924e-31	-0.252713	0.187	0.416	1.52836e-26
Mcu	8.9658e-31	-0.278759	0.33	0.557	1.52948e-26
Epn3	1.09892e-30	0.289023	0.629	0.426	1.87465e-26
Liph	1.45155e-30	0.35748	0.618	0.44	2.4762e-26
Slc25a24	1.55311e-30	-0.257683	0.205	0.445	2.64946e-26
Slc50a1	1.82589e-30	-0.269964	0.421	0.634	3.11479e-26
Cym	2.01627e-30	-1.93468	0.101	0.308	3.43956e-26
Mpc2	2.73935e-30	0.272437	0.965	0.884	4.67306e-26
Scgb3a1	3.76932e-30	-0.454147	0.068	0.266	6.43009e-26
Trim24	4.13817e-30	-0.299121	0.291	0.531	7.0593e-26
Tinagl1	5.26452e-30	0.298565	0.659	0.452	8.98075e-26
Irf6	7.75839e-30	-0.259565	0.253	0.491	1.3235e-25
App	8.06295e-30	0.274973	0.994	0.989	1.37546e-25
Cdh13	8.45539e-30	-0.250962	0.112	0.333	1.4424e-25
Cdk4	8.50222e-30	-0.285882	0.735	0.808	1.45039e-25
Carhsp1	1.21702e-29	-0.289577	0.422	0.626	2.07611e-25
Hmgb3	1.69047e-29	-0.281336	0.301	0.532	2.88377e-25
Lcorl	1.93802e-29	-0.2686	0.269	0.505	3.30606e-25
Cxcl1	2.67571e-29	-0.461202	0.08	0.28	4.56449e-25
Pold3	3.28838e-29	-0.268194	0.194	0.431	5.60965e-25
Cd164	3.61752e-29	-0.266562	0.76	0.828	6.17112e-25
Rasa2	5.17467e-29	-0.274969	0.327	0.55	8.82747e-25
Ppp1r16a	9.5219e-29	0.274887	0.45	0.263	1.62434e-24
Itgb6	1.61833e-28	-0.280723	0.488	0.695	2.76071e-24
Tpp1	2.11283e-28	0.29686	0.643	0.475	3.60427e-24
F2rl1	2.52196e-28	-0.274226	0.299	0.536	4.30221e-24
Cwh43	2.69019e-28	-0.317229	0.201	0.402	4.58919e-24
P4ha2	2.79908e-28	0.324601	0.443	0.27	4.77495e-24
Pmepa1	3.00612e-28	-0.278212	0.69	0.78	5.12814e-24
Chd3	3.18066e-28	0.324447	0.609	0.445	5.4259e-24
Abcd3	3.56116e-28	0.31547	0.861	0.724	6.07499e-24
Rpl22l1	3.57981e-28	-0.25604	0.92	0.941	6.1068e-24
Cyb5b	3.67335e-28	0.31391	0.547	0.366	6.26638e-24
Aprt	4.0076e-28	-0.294475	0.755	0.807	6.83657e-24
Gstz1	4.05814e-28	0.279316	0.398	0.219	6.92278e-24
Sdhd	4.73636e-28	-0.273904	0.418	0.608	8.07975e-24
Cd9	6.00469e-28	0.469528	0.996	0.998	1.02434e-23
Itprid2	6.29222e-28	-0.258514	0.217	0.437	1.07339e-23
Slc44a1	6.70502e-28	-0.261851	0.338	0.559	1.14381e-23
Tmpo	6.96581e-28	-0.288324	0.528	0.708	1.1883e-23
Cpd	7.01225e-28	-0.295485	0.622	0.723	1.19622e-23
Cry2	1.07137e-27	0.304717	0.386	0.217	1.82765e-23
Spg21	1.47925e-27	0.326167	0.608	0.45	2.52346e-23
Dmbt1	1.51047e-27	-0.723873	0.073	0.263	2.5767e-23
Smarcc1	1.6598e-27	-0.281356	0.503	0.677	2.83145e-23
Baz1a	1.67682e-27	-0.274037	0.266	0.476	2.86049e-23
Arhgef2	1.75991e-27	0.372223	0.515	0.362	3.00223e-23
Vars	1.76072e-27	-0.28503	0.564	0.698	3.00362e-23
Etl4	2.42661e-27	-0.262823	0.438	0.655	4.13956e-23
Irf1	2.53175e-27	-0.334368	0.31	0.532	4.31891e-23
Tut7	2.6512e-27	-0.275708	0.64	0.766	4.52269e-23
Gtpbp4	2.81231e-27	-0.27402	0.499	0.668	4.79753e-23
Tnfrsf11b	3.07274e-27	-0.256204	0.04	0.213	5.24179e-23
Agap3	3.10748e-27	0.319152	0.464	0.301	5.30105e-23
Dnajc10	3.4531e-27	-0.271943	0.265	0.478	5.89064e-23
Cd44	3.93792e-27	0.284981	0.435	0.247	6.7177e-23
Fn1	4.31295e-27	-0.271216	0.073	0.262	7.35746e-23
Uba52	7.19971e-27	-0.256525	0.778	0.837	1.2282e-22
Sbspon	8.90854e-27	-0.25232	0.06	0.239	1.51971e-22
Orai1	9.98891e-27	0.298835	0.562	0.386	1.70401e-22
Hs3st1	1.08306e-26	-0.310919	0.348	0.528	1.8476e-22
Efemp1	1.43663e-26	-0.267071	0.288	0.519	2.45075e-22
Dyrk2	1.70202e-26	-0.278703	0.418	0.627	2.90347e-22
Itpr3	2.73131e-26	-0.263959	0.378	0.569	4.65935e-22
Rab7	3.55709e-26	0.256072	0.888	0.716	6.06805e-22
Tff3	4.25602e-26	-1.30717	0.488	0.57	7.26035e-22
Erlec1	5.46069e-26	-0.262818	0.413	0.61	9.3154e-22
Arhgdia	5.62503e-26	0.279423	0.939	0.845	9.59574e-22
Snx4	6.37118e-26	0.298974	0.515	0.35	1.08686e-21
Atp6v0d1	6.92635e-26	0.306914	0.525	0.371	1.18157e-21
Sptbn1	7.26641e-26	0.39515	0.976	0.977	1.23958e-21
Uap1	9.7817e-26	-0.271928	0.378	0.565	1.66866e-21
Slfn2	1.01683e-25	-0.274913	0.071	0.247	1.73462e-21
Pcbd1	1.24225e-25	-0.250076	0.442	0.636	2.11915e-21
Trappc2l	1.41787e-25	0.25004	0.771	0.59	2.41875e-21
Irx3	1.55185e-25	0.278414	0.82	0.669	2.6473e-21
Capn2	1.64247e-25	0.318769	0.553	0.387	2.80189e-21
B4galnt1	1.66991e-25	-0.286769	0.676	0.743	2.8487e-21
Plk2	1.79686e-25	-0.275019	0.289	0.521	3.06527e-21
AW112010	1.97772e-25	-0.780521	0.475	0.58	3.3738e-21
Dbnl	2.75181e-25	0.275832	0.716	0.572	4.69431e-21
Cndp2	2.86046e-25	0.295784	0.461	0.304	4.87966e-21
Igfbp5	3.67438e-25	-0.311459	0.097	0.291	6.26812e-21
Gm3336	3.99289e-25	-0.278055	0.161	0.355	6.81148e-21
Magi1	4.00678e-25	-0.256302	0.524	0.726	6.83517e-21
Rbp1	4.11554e-25	-0.307492	0.082	0.259	7.0207e-21
Frmd4b	4.64423e-25	-0.25964	0.299	0.502	7.92259e-21
Oxct1	7.21969e-25	0.286106	0.69	0.521	1.23161e-20
Cldn18	8.18191e-25	0.475975	0.994	0.996	1.39575e-20
Mprip	8.35627e-25	0.344041	0.819	0.691	1.4255e-20
Lgals9	1.28378e-24	-0.267828	0.443	0.613	2.19e-20
Tuba1c	1.4505e-24	-0.264138	0.81	0.846	2.47441e-20
Cbr1	1.60733e-24	-0.26571	0.659	0.757	2.74195e-20
Pdia4	1.71609e-24	-0.252513	0.298	0.5	2.92748e-20
Slc6a6	2.27435e-24	-0.273066	0.544	0.675	3.87981e-20
Krt20	3.20176e-24	-0.445134	0.187	0.363	5.46188e-20
Traf4	4.68981e-24	-0.264316	0.428	0.607	8.00034e-20
Cdk5rap3	5.80054e-24	-0.253614	0.439	0.62	9.89513e-20
Gpd2	6.7685e-24	-0.265206	0.471	0.644	1.15464e-19
Snx7	8.95181e-24	0.271718	0.298	0.15	1.52709e-19
Tuba1a	9.00682e-24	0.449982	0.353	0.198	1.53647e-19
Tnip3	9.34091e-24	-0.395105	0.084	0.261	1.59347e-19
Mrpl14	1.10083e-23	0.271948	0.925	0.856	1.8779e-19
Irs2	1.16069e-23	0.318831	0.453	0.297	1.98002e-19
Kif23	1.4946e-23	-0.255736	0.109	0.287	2.54963e-19
Gnl3	1.73716e-23	-0.26142	0.306	0.509	2.96343e-19
Sqstm1	1.96571e-23	0.269626	0.672	0.51	3.3533e-19
Tmem109	2.13861e-23	0.274151	0.453	0.291	3.64825e-19
Myo1e	3.02471e-23	0.260093	0.641	0.478	5.15986e-19
Ifi27	3.04719e-23	0.293085	0.924	0.833	5.19819e-19
Ptov1	3.19725e-23	0.278272	0.885	0.774	5.45419e-19
Slc48a1	4.58733e-23	0.270283	0.42	0.263	7.82553e-19
Hsph1	5.23825e-23	-0.30689	0.388	0.543	8.93594e-19
Nenf	5.92435e-23	0.268303	0.644	0.5	1.01064e-18
Swap70	7.16962e-23	0.260514	0.327	0.178	1.22306e-18
Proser2	1.07309e-22	-0.256228	0.4	0.573	1.83058e-18
Phgr1	1.12333e-22	-0.390649	0.51	0.606	1.91629e-18
Ranbp1	1.39764e-22	-0.271366	0.777	0.812	2.38424e-18
Klc3	1.65213e-22	0.291603	0.388	0.236	2.81836e-18
Tsc22d2	1.95826e-22	-0.286058	0.464	0.629	3.34059e-18
AC102496.1	2.56097e-22	-0.281843	0.108	0.278	4.36876e-18
Cpeb4	2.98418e-22	0.284184	0.456	0.298	5.09072e-18
4930523C07Rik	3.2415e-22	0.396329	0.856	0.747	5.52967e-18
Ndfip1	6.3808e-22	0.252189	0.924	0.828	1.0885e-17
Trf	6.40667e-22	0.800926	0.404	0.243	1.09291e-17
Abca1	6.46062e-22	0.364547	0.398	0.255	1.10212e-17
Grk3	8.09985e-22	0.259542	0.399	0.243	1.38175e-17
Bnip2	9.89676e-22	0.280047	0.417	0.265	1.68829e-17
Hnrnpa1	1.15206e-21	-0.280042	0.82	0.812	1.96529e-17
Taok3	1.59264e-21	0.256812	0.931	0.829	2.71688e-17
Pfdn1	3.28429e-21	0.250913	0.87	0.74	5.60266e-17
Nme1	3.44245e-21	-0.252461	0.875	0.89	5.87247e-17
Rnf149	3.74478e-21	0.26565	0.655	0.52	6.38822e-17
Nbeal1	3.95873e-21	0.285033	0.856	0.734	6.75319e-17
Uhrf1bp1l	4.18294e-21	0.308554	0.472	0.337	7.13568e-17
Cav2	4.44729e-21	0.335884	0.368	0.231	7.58664e-17
Serinc5	4.58003e-21	0.254032	0.328	0.185	7.81306e-17
Ssh2	5.67024e-21	0.276059	0.458	0.313	9.67287e-17
Trim3	5.77654e-21	0.30898	0.44	0.308	9.85419e-17
C2cd4b	7.81461e-21	0.390468	0.301	0.159	1.3331e-16
Fbl	8.89184e-21	-0.250499	0.528	0.651	1.51686e-16
Rap1a	1.23789e-20	0.25092	0.774	0.616	2.11172e-16
Flot1	1.82629e-20	0.338113	0.428	0.296	3.11547e-16
Efna1	3.23601e-20	0.305255	0.414	0.271	5.52031e-16
Cldn4	4.99695e-20	-0.651297	0.259	0.404	8.52429e-16
Bcr	6.25282e-20	0.253216	0.392	0.251	1.06667e-15
Stx8	6.34926e-20	0.258745	0.663	0.537	1.08312e-15
Cald1	7.68239e-20	0.25481	0.263	0.132	1.31054e-15
Mylk	8.69337e-20	0.270407	0.359	0.213	1.483e-15
Tjp1	9.50725e-20	0.312761	0.749	0.615	1.62184e-15
Etv3	2.13707e-19	-0.252463	0.33	0.505	3.64562e-15
Agpat3	3.91224e-19	0.262346	0.493	0.372	6.67389e-15
Rasgef1b	4.70736e-19	0.305765	0.532	0.408	8.03029e-15
Rhoc	6.18891e-19	-0.311809	0.56	0.651	1.05577e-14
Gadd45b	7.46245e-19	-0.486159	0.676	0.732	1.27302e-14
Mt1	7.91338e-19	-0.321923	0.886	0.89	1.34994e-14
Slc1a5	1.40709e-18	0.287114	0.558	0.447	2.40035e-14
Fdps	1.47656e-18	0.391435	0.436	0.286	2.51886e-14
Plxnb1	1.58645e-18	0.258858	0.416	0.279	2.70633e-14
Acot1	1.70335e-18	0.254044	0.406	0.265	2.90574e-14
Slco3a1	2.16183e-18	0.359683	0.517	0.399	3.68786e-14
Net1	2.37597e-18	-0.252273	0.445	0.589	4.05316e-14
Olfm4	2.85076e-18	-0.556484	0.03	0.151	4.86311e-14
Stmn1	2.89447e-18	-0.391559	0.427	0.575	4.93768e-14
Rlim	2.99983e-18	-0.255185	0.529	0.664	5.11741e-14
Myo5b	3.73655e-18	0.252824	0.467	0.337	6.37417e-14
S100a14	6.90137e-18	0.308886	0.565	0.404	1.1773e-13
Usp8	7.08314e-18	0.26123	0.515	0.393	1.20831e-13
Anxa2	7.85457e-18	0.253542	0.978	0.959	1.33991e-13
Wwc2	1.18666e-17	0.262421	0.705	0.591	2.02433e-13
Mical2	1.47784e-17	0.276649	0.489	0.361	2.52105e-13
Anxa5	1.56564e-17	0.479059	0.913	0.922	2.67082e-13
Dnase2a	2.72215e-17	0.266747	0.475	0.353	4.64371e-13
Uap1l1	2.96288e-17	0.253057	0.547	0.422	5.05439e-13
Pink1	3.075e-17	0.262143	0.467	0.343	5.24564e-13
Myo1c	7.25459e-17	0.271181	0.59	0.456	1.23756e-12
Rab27a	9.5368e-17	0.272968	0.378	0.252	1.62688e-12
Ccz1	1.22774e-16	0.271821	0.615	0.516	2.09441e-12
Ano1	1.34355e-16	0.283772	0.677	0.57	2.29197e-12
Slc39a4	2.16005e-16	-0.273889	0.598	0.681	3.68482e-12
Ang	1.5653e-15	0.318189	0.494	0.368	2.67025e-11
Ltf	2.091e-15	-0.263911	0.037	0.148	3.56703e-11
Tmem176b	2.40584e-15	0.286145	0.988	0.984	4.10413e-11
Dnajb1	3.20667e-15	-0.432192	0.735	0.738	5.47026e-11
Hmgb2	3.90004e-15	-0.3347	0.515	0.64	6.65307e-11
H2-Q7	6.40465e-15	0.258577	0.136	0.053	1.09257e-10
Epb41l5	7.09735e-15	0.283707	0.546	0.459	1.21074e-10
Mucl3	1.48793e-14	-0.676273	0.489	0.534	2.53827e-10
Arfgef3	2.21981e-14	0.27269	0.479	0.381	3.78677e-10
Socs3	4.40133e-14	-0.432861	0.765	0.751	7.50822e-10
Resf1	5.25638e-14	0.291482	0.841	0.744	8.96686e-10
Spsb2	1.0318e-13	0.275325	0.486	0.395	1.76015e-09
Lrg1	1.57171e-13	1.08931	0.407	0.306	2.68118e-09
Phlda3	2.00855e-13	0.264745	0.208	0.112	3.42639e-09
Cdkn1b	2.01835e-13	0.268314	0.463	0.366	3.44311e-09
Ifitm2	5.40816e-13	-0.304194	0.633	0.654	9.22578e-09
Ceacam1	1.88402e-12	-0.289743	0.619	0.649	3.21396e-08
Mt2	6.94999e-12	-0.30727	0.353	0.476	1.1856e-07
Anxa3	1.1492e-11	0.293285	0.993	0.993	1.96041e-07
Cyp2b10	4.09658e-11	0.479491	0.166	0.089	6.98835e-07
AY036118	1.19635e-10	0.290906	0.911	0.899	2.04085e-06
Gcnt3	1.68272e-10	-0.265724	0.274	0.365	2.87055e-06
Cavin2	1.0287e-08	0.411612	0.41	0.361	0.000175486
Cavin3	6.75938e-08	0.306352	0.323	0.258	0.00115308
Cpm	2.30177e-06	0.272894	0.708	0.688	0.0392659
Ptpre	4.18763e-06	0.259669	0.337	0.29	0.0714368
Kcnk2	8.51517e-05	0.257986	0.283	0.235	1
Gadd45g	0.000200784	-0.33651	0.346	0.403	1
Gkn1	0.00279168	-0.531511	0.51	0.488	1
Gm26917	0.271432	0.504362	0.517	0.492	1
Fabp5	0.68777	0.705889	0.853	0.843	1
Gkn2	0.98619	-0.577568	0.492	0.413	1
