# Supplementary material for: An NKX2-1/ERK/WNT feedback loop modulates gastric identity and response to targeted therapy in lung adenocarcinoma
Source: eLife. 2021 Apr 6;10:e66788. doi: 10.7554/eLife.66788 (PMC8102067; doi:10.7554/eLife.66788)
Supplement: Supplementary file 5. [file elife-66788-supp5.xlsx]

## Sheet: Summary
Supplementary File 5 - BP C vs BP Tx GO analysis by Correlation Engine

## Sheet: UP pathways
Bioset vs Biogroups record downloaded from Correlation Engine(2019/12/10 21:03:33)
Bioset: BP_C.vs.BP_TX_CorrEng
Study: 14489R
https://hci.ussc.informatics.illumina.com/c/search/bg/?type=bioset&id=1207744#bgcf=true&dcf=1&gcmax=500&gcmin=10&taxf=ontologies
Biogroup name	source	Score	common genes	direction	p-value
cell division	GO	105.763	41	up	1.2e-46
mitosis	GO	104.365	36	up	4.7e-46
nuclear division	GO	104.365	36	up	4.7e-46
kinetochore	GO	51.2369	16	up	5.6e-23
spindle	GO	49.2096	17	up	4.3e-22
cytokinesis	GO	43.1121	12	up	1.9e-19
microtubule	GO	41.2254	18	up	1.2e-18
chromosome segregation	GO	39.6209	14	up	6.2e-18
midbody	GO	35.1243	10	up	5.6e-16
regulation of mitotic cell cycle	GO	34.3916	16	up	1.2e-15
condensed chromosome kinetochore	GO	30.9768	7	up	3.5e-14
centrosome	GO	28.4971	16	up	4.2e-13
microtubule organizing center	GO	27.4623	16	up	1.2e-12
condensed chromosome outer kinetochore	GO	26.2259	5	up	4.1e-12
mitotic spindle organization	GO	24.7924	6	up	1.7e-11
cell cycle cytokinesis	GO	24.5993	6	up	2.1e-11
sister chromatid segregation	GO	23.6351	7	up	5.4e-11
cell proliferation	GO	23.403	15	up	6.9e-11
nuclear chromosome	GO	23.2419	11	up	8.1e-11
interphase	GO	23.0425	10	up	9.8e-11
kinase binding	GO	21.9439	14	up	3e-10
perinuclear region of cytoplasm	GO	20.3431	14	up	1.5e-09
positive regulation of cell cycle	GO	20.277	9	up	1.6e-09
interphase of mitotic cell cycle	GO	20.2093	9	up	1.7e-09
mitotic sister chromatid segregation	GO	19.9387	6	up	2.2e-09
microtubule motor activity	GO	19.8487	6	up	2.4e-09
motor activity	GO	19.4719	7	up	3.5e-09
spindle pole	GO	19.0275	6	up	5.5e-09
G2/M transition of mitotic cell cycle	GO	18.9867	6	up	5.7e-09
establishment of organelle localization	GO	18.0557	6	up	1.4e-08
organelle localization	GO	18.0296	8	up	1.5e-08
regulation of cell division	GO	17.9276	6	up	1.6e-08
tubulin binding	GO	16.9574	8	up	4.3e-08
cellular process involved in reproduction	GO	15.8904	11	up	1.3e-07
serine-type peptidase activity	GO	15.5414	7	up	1.8e-07
serine hydrolase activity	GO	15.4979	7	up	1.9e-07
regulation of protein serine/threonine kinase activity	GO	14.736	10	up	4e-07
anchored to membrane	GO	14.6804	7	up	4.2e-07
hormone metabolic process	GO	14.4186	7	up	5.5e-07
meiosis	GO	14.0432	6	up	8e-07
meiotic cell cycle	GO	13.9053	6	up	9.1e-07
calcium-dependent protein binding	GO	13.4276	4	up	1.5e-06
positive regulation of cell cycle cytokinesis	GO	13.0062	3	up	2.2e-06
regulation of cell cycle cytokinesis	GO	13.0062	3	up	2.2e-06
establishment of mitotic spindle localization	GO	12.891	3	up	2.5e-06
establishment of chromosome localization	GO	12.6419	3	up	3.2e-06
protein C-terminus binding	GO	12.6234	7	up	3.3e-06
tissue morphogenesis	GO	12.1146	10	up	5.5e-06
maintenance of protein location in cell	GO	12.0657	5	up	5.8e-06
establishment of spindle localization	GO	12.031	3	up	6e-06
secretion	GO	11.8964	9	up	6.8e-06
phosphoprotein phosphatase activity	GO	11.8726	5	up	7e-06
spindle localization	GO	11.5189	3	up	9.9e-06
maintenance of location in cell	GO	11.4174	5	up	1.1e-05
maintenance of protein location	GO	11.2981	5	up	1.2e-05
urogenital system development	GO	11.2454	7	up	1.3e-05
mitotic spindle	GO	11.1412	3	up	1.5e-05
regulation of epithelial cell proliferation	GO	11.0427	7	up	1.6e-05
positive regulation of programmed cell death	GO	11.0055	10	up	1.7e-05
epithelial cell differentiation	GO	10.8583	7	up	1.9e-05
angiogenesis	GO	10.6498	7	up	2.4e-05
blood vessel morphogenesis	GO	10.4762	8	up	2.8e-05
negative regulation of cellular component organization	GO	10.4761	8	up	2.8e-05
regulation of defense response	GO	10.4257	8	up	3e-05
maintenance of location	GO	10.3462	5	up	3.2e-05
epithelial cell proliferation	GO	10.2118	4	up	3.7e-05
regulation of interphase of mitotic cell cycle	GO	9.99384	5	up	4.6e-05
C21-steroid hormone metabolic process	GO	9.93882	3	up	4.8e-05
endoderm development	GO	9.70263	3	up	6.1e-05
response to DNA damage stimulus	GO	9.66449	9	up	6.3e-05
basolateral plasma membrane	GO	9.22122	7	up	9.9e-05
mitotic cell cycle G2/M transition checkpoint	GO	9.14241	2	up	0.0001
microtubule organizing center organization	GO	9.08055	3	up	0.0001
regulation of cell projection organization	GO	9.06909	7	up	0.0001
cell division site	GO	9.03761	3	up	0.0001
cell division site part	GO	9.03761	3	up	0.0001
nucleolus	GO	9.01553	7	up	0.0001
regulation of organ growth	GO	8.795	4	up	0.0002
protein heterodimerization activity	GO	8.78427	8	up	0.0002
mitotic chromosome condensation	GO	8.77236	2	up	0.0002
neuron projection development	GO	8.72361	7	up	0.0002
collagen	GO	8.64629	4	up	0.0002
regulation of intracellular transport	GO	8.62168	5	up	0.0002
GTPase binding	GO	8.57019	5	up	0.0002
growth	GO	8.56581	7	up	0.0002
growth cone	GO	8.54585	4	up	0.0002
endothelial cell proliferation	GO	8.4798	2	up	0.0002
biomineral tissue development	GO	8.43185	3	up	0.0002
site of polarized growth	GO	8.42767	4	up	0.0002
sensory perception of mechanical stimulus	GO	8.31428	5	up	0.0002
calcium-dependent phospholipid binding	GO	8.27634	2	up	0.0003
oocyte maturation	GO	8.2347	2	up	0.0003
metaphase plate congression	GO	8.2347	2	up	0.0003
receptor signaling protein activity	GO	8.22713	4	up	0.0003
ossification	GO	8.17219	5	up	0.0003
establishment of mitotic spindle orientation	GO	8.17019	2	up	0.0003
steroid binding	GO	8.16824	2	up	0.0003
regulation of embryonic development	GO	8.1279	3	up	0.0003
actin binding	GO	8.09246	7	up	0.0003
microtubule associated complex	GO	8.09097	3	up	0.0003
transmission of nerve impulse	GO	7.94687	8	up	0.0004
gland development	GO	7.92061	6	up	0.0004
lipid storage	GO	7.92019	1	up	0.0004
phospholipid transporter activity	GO	7.92019	1	up	0.0004
clathrin binding	GO	7.90471	2	up	0.0004
regeneration	GO	7.87362	3	up	0.0004
establishment of spindle orientation	GO	7.85173	2	up	0.0004
lipoprotein particle binding	GO	7.78666	1	up	0.0004
protein-lipid complex binding	GO	7.78666	1	up	0.0004
sterol binding	GO	7.78666	1	up	0.0004
protein complex binding	GO	7.75158	8	up	0.0004
beta-amyloid binding	GO	7.74583	1	up	0.0004
multicellular organismal signaling	GO	7.68957	8	up	0.0005
synaptic transmission	GO	7.63542	6	up	0.0005
ruffle	GO	7.58878	4	up	0.0005
steroid biosynthetic process	GO	7.58633	3	up	0.0005
secretion by cell	GO	7.49012	6	up	0.0006
regulation of cell growth	GO	7.44608	6	up	0.0006
phospholipid transport	GO	7.40936	1	up	0.0006
cellular biogenic amine metabolic process	GO	7.36515	2	up	0.0006
regulation of cell migration	GO	7.26966	7	up	0.0007
sterol transport	GO	7.22704	1	up	0.0007
neuron development	GO	7.1803	7	up	0.0008
negative regulation of cell proliferation	GO	7.13853	7	up	0.0008
regulation of cell motility	GO	7.05113	7	up	0.0009
laminin binding	GO	7.04922	2	up	0.0009
centrosome cycle	GO	7.03677	2	up	0.0009
receptor signaling protein serine/threonine kinase activity	GO	6.97885	3	up	0.0009
oocyte development	GO	6.96738	2	up	0.0009
lipoprotein biosynthetic process	GO	6.93936	2	up	0.001
oocyte differentiation	GO	6.89697	2	up	0.001
regulation of striated muscle tissue development	GO	6.89555	3	up	0.001
ubiquitin-protein ligase activity	GO	6.85769	3	up	0.0011
embryonic pattern specification	GO	6.81509	3	up	0.0011
cytolysis	GO	6.73098	1	up	0.0012
establishment or maintenance of cell polarity	GO	6.70729	3	up	0.0012
transferase activity, transferring glycosyl groups	GO	6.67716	5	up	0.0013
enzyme inhibitor activity	GO	6.67413	5	up	0.0013
regulation of purine nucleotide metabolic process	GO	6.67311	6	up	0.0013
morphogenesis of an epithelium	GO	6.67251	6	up	0.0013
sex differentiation	GO	6.65745	5	up	0.0013
reciprocal DNA recombination	GO	6.51146	2	up	0.0015
reciprocal meiotic recombination	GO	6.51146	2	up	0.0015
negative regulation of cell adhesion	GO	6.51036	2	up	0.0015
heme binding	GO	6.4792	2	up	0.0015
reproductive structure development	GO	6.42889	5	up	0.0016
reproductive system development	GO	6.42889	5	up	0.0016
deaminase activity	GO	6.41217	2	up	0.0016
intermediate filament	GO	6.3884	4	up	0.0017
regulation of nucleocytoplasmic transport	GO	6.38281	4	up	0.0017
keratinocyte differentiation	GO	6.36196	3	up	0.0017
acid-amino acid ligase activity	GO	6.35191	3	up	0.0017
tetrapyrrole binding	GO	6.34198	2	up	0.0018
positive regulation of cell motility	GO	6.34113	5	up	0.0018
cellular extravasation	GO	6.31148	1	up	0.0018
endocrine system development	GO	6.28258	2	up	0.0019
cell leading edge	GO	6.27122	5	up	0.0019
regulation of lipid metabolic process	GO	6.26462	2	up	0.0019
negative regulation of protein metabolic process	GO	6.23992	7	up	0.002
positive regulation of cellular component movement	GO	6.21294	5	up	0.002
Golgi cisterna	GO	6.21131	2	up	0.002
transferase activity, transferring hexosyl groups	GO	6.19073	4	up	0.002
regulation of protein localization to nucleus	GO	6.1856	3	up	0.0021
UDP-glycosyltransferase activity	GO	6.16053	3	up	0.0021
basal lamina	GO	6.15155	2	up	0.0021
organelle subcompartment	GO	6.133	2	up	0.0022
blastocyst development	GO	6.1225	3	up	0.0022
syntaxin binding	GO	6.10953	2	up	0.0022
keratinization	GO	6.08984	2	up	0.0023
virus-host interaction	GO	6.0329	2	up	0.0024
peptidase inhibitor activity	GO	6.0273	4	up	0.0024
blastocyst growth	GO	6.02675	2	up	0.0024
cofactor binding	GO	6.0254	5	up	0.0024
ligase activity, forming carbon-nitrogen bonds	GO	6.02421	3	up	0.0024
cyclin-dependent protein kinase regulator activity	GO	6.02117	2	up	0.0024
negative regulation of secretion	GO	6.00888	2	up	0.0025
sensory perception of pain	GO	5.96297	3	up	0.0026
regulation of body fluid levels	GO	5.96192	4	up	0.0026
chromatin	GO	5.95469	4	up	0.0026
hydrolase activity, acting on carbon-nitrogen (but not peptide) bonds, in cyclic amidines	GO	5.90973	2	up	0.0027
kidney development	GO	5.90228	4	up	0.0027
nuclear matrix	GO	5.90174	2	up	0.0027
cell cortex	GO	5.87034	4	up	0.0028
replacement ossification	GO	5.86208	2	up	0.0028
ovarian follicle development	GO	5.84572	2	up	0.0029
cellular response to hormone stimulus	GO	5.8449	2	up	0.0029
cleavage furrow	GO	5.82691	2	up	0.0029
SNARE binding	GO	5.81822	2	up	0.003
viral reproductive process	GO	5.81785	2	up	0.003
terpenoid metabolic process	GO	5.81709	2	up	0.003
regulation of neurogenesis	GO	5.81361	7	up	0.003
connexon complex	GO	5.80748	2	up	0.003
integrin binding	GO	5.80666	3	up	0.003
epidermal cell differentiation	GO	5.80544	3	up	0.003
basal part of cell	GO	5.77652	2	up	0.0031
Golgi apparatus part	GO	5.76947	4	up	0.0031
alcohol metabolic process	GO	5.76621	1	up	0.0031
tissue homeostasis	GO	5.76606	3	up	0.0031
regulation of microtubule polymerization or depolymerization	GO	5.76576	2	up	0.0031
ERBB signaling pathway	GO	5.74759	2	up	0.0032
glucosamine-containing compound metabolic process	GO	5.688	1	up	0.0034
GTPase regulator activity	GO	5.63121	6	up	0.0036
glycerolipid metabolic process	GO	5.60342	3	up	0.0037
gland morphogenesis	GO	5.59487	3	up	0.0037
negative regulation of transport	GO	5.58863	5	up	0.0037
single fertilization	GO	5.53225	2	up	0.004
membrane lipid biosynthetic process	GO	5.52745	2	up	0.004
axis specification	GO	5.52639	3	up	0.004
enzyme activator activity	GO	5.45985	5	up	0.0043
regulation of binding	GO	5.42349	3	up	0.0044
filopodium	GO	5.40579	1	up	0.0045
acute inflammatory response	GO	5.34442	2	up	0.0048
embryonic axis specification	GO	5.32614	2	up	0.0049
regulation of smooth muscle cell proliferation	GO	5.3207	3	up	0.0049
establishment of tissue polarity	GO	5.3144	1	up	0.0049
cell morphogenesis involved in neuron differentiation	GO	5.30872	3	up	0.0049
regulation of transmission of nerve impulse	GO	5.29018	4	up	0.005
regulation of neuron differentiation	GO	5.28447	6	up	0.0051
response to light stimulus	GO	5.26484	4	up	0.0052
regulation of secretion	GO	5.22713	6	up	0.0054
viral reproduction	GO	5.21396	2	up	0.0054
mRNA splice site selection	GO	5.18644	1	up	0.0056
negative regulation of multicellular organismal process	GO	5.17475	3	up	0.0057
sulfotransferase activity	GO	5.15004	2	up	0.0058
vacuole	GO	5.14881	5	up	0.0058
histone binding	GO	5.13907	3	up	0.0059
activation of cysteine-type endopeptidase activity	GO	5.13596	2	up	0.0059
fatty-acyl-CoA binding	GO	5.13255	1	up	0.0059
negative regulation of protein serine/threonine kinase activity	GO	5.11361	3	up	0.006
isoprenoid metabolic process	GO	5.08187	2	up	0.0062
amine catabolic process	GO	5.08136	1	up	0.0062
actin filament bundle	GO	5.06453	2	up	0.0063
hormone biosynthetic process	GO	5.05969	2	up	0.0063
ovulation cycle process	GO	5.0539	2	up	0.0064
Golgi stack	GO	5.05201	2	up	0.0064
negative regulation of immune system process	GO	5.04313	4	up	0.0065
positive regulation of cell growth	GO	5.01183	3	up	0.0067
transferase activity, transferring sulfur-containing groups	GO	4.9963	2	up	0.0068
negative regulation of cell growth	GO	4.99516	3	up	0.0068
carbohydrate derivative biosynthetic process	GO	4.99411	4	up	0.0068
regulation of release of sequestered calcium ion into cytosol	GO	4.98634	1	up	0.0068
endopeptidase inhibitor activity	GO	4.98485	3	up	0.0068
regulation of synapse assembly	GO	4.96889	1	up	0.007
regulation of neurological system process	GO	4.96678	4	up	0.007
ovulation cycle	GO	4.95718	2	up	0.007
cell part morphogenesis	GO	4.94855	5	up	0.0071
multicellular organismal homeostasis	GO	4.94761	3	up	0.0071
establishment of cell polarity	GO	4.91471	2	up	0.0073
response to hormone stimulus	GO	4.89359	4	up	0.0075
regulation of hormone secretion	GO	4.88972	3	up	0.0075
chemical homeostasis within a tissue	GO	4.87682	1	up	0.0076
female gamete generation	GO	4.87427	2	up	0.0076
ligase activity	GO	4.87174	3	up	0.0077
oxygen binding	GO	4.85897	1	up	0.0078
positive regulation of apoptotic signaling pathway	GO	4.84825	2	up	0.0078
regulation of synapse organization	GO	4.83513	2	up	0.0079
steroid hydroxylase activity	GO	4.78644	1	up	0.0083
nuclear envelope	GO	4.73174	3	up	0.0088
chromatin assembly	GO	4.73123	2	up	0.0088
symbiosis, encompassing mutualism through parasitism	GO	4.72055	2	up	0.0089
interspecies interaction between organisms	GO	4.72055	2	up	0.0089
nuclear ubiquitin ligase complex	GO	4.70546	1	up	0.009
cyclin binding	GO	4.69976	1	up	0.0091
retinol binding	GO	4.6997	1	up	0.0091
retinal binding	GO	4.6997	1	up	0.0091
fertilization	GO	4.69216	2	up	0.0092
heart contraction	GO	4.68424	2	up	0.0092
indole-containing compound metabolic process	GO	4.6774	1	up	0.0093
osteoblast differentiation	GO	4.6693	2	up	0.0094
epidermis development	GO	4.63409	4	up	0.0097
contractile fiber part	GO	4.62809	3	up	0.0098
protein secretion	GO	4.62003	1	up	0.0099
protein-DNA complex assembly	GO	4.6182	2	up	0.0099
regulation of synapse structure and activity	GO	4.61671	2	up	0.0099
development of primary female sexual characteristics	GO	4.6144	2	up	0.0099
osteoblast development	GO	4.6097	1	up	0.01
neuropeptide receptor activity	GO	4.58823	2	up	0.0102
DNA repair	GO	4.56474	4	up	0.0104
anterior/posterior axis specification	GO	4.56314	2	up	0.0104
GTPase activator activity	GO	4.55803	3	up	0.0105
lung alveolus development	GO	4.54141	2	up	0.0107
female sex differentiation	GO	4.51928	2	up	0.0109
meiosis I	GO	4.50219	2	up	0.0111
regulation of translation	GO	4.50055	4	up	0.0111
xenobiotic metabolic process	GO	4.49905	1	up	0.0111
sarcoplasm	GO	4.44208	2	up	0.0118
aromatic amino acid family metabolic process	GO	4.43353	1	up	0.0119
response to xenobiotic stimulus	GO	4.41495	1	up	0.0121
external encapsulating structure part	GO	4.40778	1	up	0.0122
cell envelope	GO	4.40778	1	up	0.0122
placenta development	GO	4.38783	3	up	0.0124
water transmembrane transporter activity	GO	4.35847	1	up	0.0128
regulation of membrane potential	GO	4.34422	4	up	0.013
protein-DNA complex subunit organization	GO	4.31619	2	up	0.0134
ligand-activated sequence-specific DNA binding RNA polymerase II transcription factor activity	GO	4.31292	1	up	0.0134
hormone activity	GO	4.30962	2	up	0.0134
trans-Golgi network	GO	4.29722	1	up	0.0136
external encapsulating structure	GO	4.25463	1	up	0.0142
hormone receptor binding	GO	4.24245	3	up	0.0144
cellular component disassembly at cellular level	GO	4.23481	2	up	0.0145
glycoprotein biosynthetic process	GO	4.22882	3	up	0.0146
cell maturation	GO	4.22142	2	up	0.0147
contractile fiber	GO	4.20709	3	up	0.0149
water homeostasis	GO	4.20537	1	up	0.0149
response to reactive oxygen species	GO	4.19156	1	up	0.0151
axon part	GO	4.18733	3	up	0.0152
cellular component disassembly	GO	4.18688	2	up	0.0152
exocytosis	GO	4.17346	3	up	0.0154
growth factor activity	GO	4.16953	3	up	0.0155
extrinsic to membrane	GO	4.16564	2	up	0.0155
heart development	GO	4.14835	5	up	0.0158
protein binding, bridging	GO	4.14206	2	up	0.0159
response to radiation	GO	4.08312	4	up	0.0169
cysteine-type endopeptidase inhibitor activity involved in apoptotic process	GO	4.08103	1	up	0.0169
neurotransmitter receptor activity	GO	4.07289	2	up	0.017
multi-organism reproductive process	GO	4.05453	3	up	0.0173
dynein binding	GO	4.05104	1	up	0.0174
mitotic metaphase plate congression	GO	4.04217	1	up	0.0176
cullin-RING ubiquitin ligase complex	GO	4.01262	2	up	0.0181
structure-specific DNA binding	GO	4.00555	3	up	0.0182
chromosome separation	GO	3.98846	1	up	0.0185
regulation of carbohydrate biosynthetic process	GO	3.98593	1	up	0.0186
Golgi membrane	GO	3.97699	2	up	0.0187
cell aging	GO	3.96926	2	up	0.0189
regulation of proteolysis	GO	3.93648	3	up	0.0195
carbohydrate metabolic process	GO	3.92068	5	up	0.0198
cell-cell junction organization	GO	3.87119	1	up	0.0208
retinoid binding	GO	3.85835	1	up	0.0211
fluid transport	GO	3.85186	1	up	0.0212
germ cell development	GO	3.84914	2	up	0.0213
gonad development	GO	3.84622	3	up	0.0214
response to hexose stimulus	GO	3.82584	1	up	0.0218
isoprenoid binding	GO	3.75768	1	up	0.0233
regulation of JAK-STAT cascade	GO	3.74101	1	up	0.0237
RNA polymerase II core promoter proximal region sequence-specific DNA binding transcription factor activity involved in positive regulation of transcription	GO	3.74101	1	up	0.0237
regulation of peptidyl-tyrosine phosphorylation	GO	3.73126	2	up	0.024
G1/S transition of mitotic cell cycle	GO	3.72644	2	up	0.0241
regulation of protein catabolic process	GO	3.72299	3	up	0.0242
RNA polymerase II transcription regulatory region sequence-specific DNA binding transcription factor activity involved in positive regulation of transcription	GO	3.71429	1	up	0.0244
response to carbohydrate stimulus	GO	3.71429	1	up	0.0244
fibrillar collagen	GO	3.7119	1	up	0.0244
response to topologically incorrect protein	GO	3.66744	2	up	0.0255
cysteine-type endopeptidase regulator activity involved in apoptotic process	GO	3.65266	1	up	0.0259
oxidoreductase activity, acting on the CH-OH group of donors, NAD or NADP as acceptor	GO	3.63984	1	up	0.0263
response to ethanol	GO	3.60999	1	up	0.0271
integrin complex	GO	3.60436	1	up	0.0272
ovulation	GO	3.60236	1	up	0.0273
positive regulation of ERBB signaling pathway	GO	3.60236	1	up	0.0273
regulation of T cell migration	GO	3.60214	1	up	0.0273
behavior	GO	3.59843	5	up	0.0274
subpallium development	GO	3.58996	1	up	0.0276
response to alcohol	GO	3.58965	1	up	0.0276
rhythmic process	GO	3.58963	3	up	0.0276
coenzyme binding	GO	3.57745	3	up	0.0279
magnesium ion binding	GO	3.56307	3	up	0.0284
primary cilium	GO	3.56107	1	up	0.0284
positive regulation of protein ubiquitination involved in ubiquitin-dependent protein catabolic process	GO	3.53947	1	up	0.029
regulation of MAPK cascade	GO	3.5287	5	up	0.0293
membrane repolarization involved in regulation of action potential	GO	3.52793	1	up	0.0294
membrane repolarization involved in regulation of cardiac muscle cell action potential	GO	3.52793	1	up	0.0294
membrane repolarization	GO	3.52793	1	up	0.0294
regulation of heart rate by cardiac conduction	GO	3.52793	1	up	0.0294
regulation of cardiac muscle cell action potential involved in contraction	GO	3.52793	1	up	0.0294
female pregnancy	GO	3.5266	2	up	0.0294
regulatory region nucleic acid binding	GO	3.5241	3	up	0.0295
regulatory region DNA binding	GO	3.5241	3	up	0.0295
regulation of ion homeostasis	GO	3.50998	2	up	0.0299
epithelial cell differentiation involved in kidney development	GO	3.49966	1	up	0.0302
regulation of muscle contraction	GO	3.4956	2	up	0.0303
regulation of reproductive process	GO	3.49435	3	up	0.0304
G-protein coupled peptide receptor activity	GO	3.488	2	up	0.0306
core promoter proximal region sequence-specific DNA binding	GO	3.48727	1	up	0.0306
development of primary sexual characteristics	GO	3.48406	3	up	0.0307
thiolester hydrolase activity	GO	3.47069	1	up	0.0311
regulation of multicellular organismal metabolic process	GO	3.46821	1	up	0.0312
chaperone binding	GO	3.45967	1	up	0.0314
regulation of apoptotic signaling pathway	GO	3.45911	2	up	0.0315
cell communication involved in cardiac conduction	GO	3.43409	1	up	0.0323
RNA polymerase II core promoter proximal region sequence-specific DNA binding transcription factor activity	GO	3.43049	1	up	0.0324
binding, bridging	GO	3.42758	2	up	0.0325
RNA polymerase II distal enhancer sequence-specific DNA binding transcription factor activity	GO	3.42069	1	up	0.0327
core promoter proximal region DNA binding	GO	3.41432	1	up	0.0329
chromatin binding	GO	3.41036	4	up	0.033
hormone binding	GO	3.39804	2	up	0.0334
response to steroid hormone stimulus	GO	3.39765	2	up	0.0335
response to oxidative stress	GO	3.39416	1	up	0.0336
ribonucleoprotein complex assembly	GO	3.38119	1	up	0.034
behavioral defense response	GO	3.3684	1	up	0.0344
membrane depolarization involved in regulation of action potential	GO	3.34855	1	up	0.0351
membrane depolarization involved in regulation of cardiac muscle cell action potential	GO	3.34855	1	up	0.0351
meiotic chromosome segregation	GO	3.34631	1	up	0.0352
fucosylation	GO	3.34131	1	up	0.0354
ribonucleoprotein complex subunit organization	GO	3.32944	1	up	0.0358
lymphocyte homeostasis	GO	3.32676	1	up	0.0359
vasculogenesis	GO	3.30641	1	up	0.0366
immunoglobulin production	GO	3.28981	1	up	0.0373
neuropeptide receptor binding	GO	3.28652	1	up	0.0374
endoplasmic reticulum part	GO	3.28651	4	up	0.0374
negative regulation of CD4-positive, alpha-beta T cell activation	GO	3.27663	1	up	0.0378
voltage-gated sodium channel complex	GO	3.26998	1	up	0.038
sarcolemma	GO	3.26919	2	up	0.038
nucleoside binding	GO	3.26221	1	up	0.0383
positive regulation of protein serine/threonine kinase activity	GO	3.25195	3	up	0.0387
blastoderm segmentation	GO	3.25189	1	up	0.0387
tripartite regional subdivision	GO	3.25189	1	up	0.0387
regulation of lymphocyte migration	GO	3.25131	1	up	0.0387
fear response	GO	3.24804	1	up	0.0389
oxidoreductase activity, acting on single donors with incorporation of molecular oxygen, incorporation of two atoms of oxygen	GO	3.22607	1	up	0.0397
oxidoreductase activity, acting on single donors with incorporation of molecular oxygen	GO	3.21358	1	up	0.0402
DNA biosynthetic process	GO	3.21304	1	up	0.0402
multicellular organismal catabolic process	GO	3.2092	1	up	0.0404
Ras guanyl-nucleotide exchange factor activity	GO	3.20204	2	up	0.0407
regulation of sodium ion transmembrane transporter activity	GO	3.19735	1	up	0.0409
regulation of cardiac muscle cell contraction	GO	3.19735	1	up	0.0409
pyrimidine-containing compound catabolic process	GO	3.19459	1	up	0.041
filamentous actin	GO	3.16657	1	up	0.0421
dioxygenase activity	GO	3.16519	1	up	0.0422
production of molecular mediator of immune response	GO	3.16177	1	up	0.0424
transcription factor binding	GO	3.16003	4	up	0.0424
epidermis morphogenesis	GO	3.14698	1	up	0.043
regulation of protein ubiquitination involved in ubiquitin-dependent protein catabolic process	GO	3.14128	1	up	0.0432
positive regulation of intrinsic apoptotic signaling pathway	GO	3.14128	1	up	0.0432
chromatin remodeling complex	GO	3.13011	2	up	0.0437
morphogenesis of embryonic epithelium	GO	3.12988	2	up	0.0437
inner cell mass cell proliferation	GO	3.12205	1	up	0.0441
cellular component disassembly involved in execution phase of apoptosis	GO	3.1191	1	up	0.0442
ubiquitin ligase complex	GO	3.11724	2	up	0.0443
eye morphogenesis	GO	3.09946	2	up	0.0451
microtubule organizing center part	GO	3.09883	1	up	0.0451
intrinsic to organelle membrane	GO	3.09196	3	up	0.0454
execution phase of apoptosis	GO	3.08596	1	up	0.0457
leukocyte homeostasis	GO	3.07315	1	up	0.0463
sodium channel regulator activity	GO	3.06676	1	up	0.0466
channel inhibitor activity	GO	3.06676	1	up	0.0466
negative regulation of leukocyte apoptotic process	GO	3.056	1	up	0.0471
regulation of vasodilation	GO	3.04489	1	up	0.0476
mRNA binding	GO	3.02898	2	up	0.0484
cytoplasmic sequestering of protein	GO	3.02553	1	up	0.0485
positive regulation of viral reproduction	GO	2.99295	1	up	0.0501
protein complex disassembly	GO	2.99266	1	up	0.0502
endoplasmic reticulum membrane	GO	2.97033	3	up	0.0513
dystrophin-associated glycoprotein complex	GO	2.96867	1	up	0.0514
phenol-containing compound metabolic process	GO	2.95541	1	up	0.0521
aging	GO	2.95056	2	up	0.0523
extrinsic to internal side of plasma membrane	GO	2.93018	1	up	0.0534
response to osmotic stress	GO	2.92468	1	up	0.0537
regulation of ERBB signaling pathway	GO	2.92277	1	up	0.0538
structural constituent of muscle	GO	2.91304	1	up	0.0543
cellular aldehyde metabolic process	GO	2.91057	1	up	0.0544
regulation of viral genome replication	GO	2.90823	1	up	0.0546
nuclear outer membrane-endoplasmic reticulum membrane network	GO	2.90691	3	up	0.0546
apoptotic signaling pathway	GO	2.9038	2	up	0.0548
heat shock protein binding	GO	2.90011	1	up	0.055
regulation of cardiac muscle cell action potential	GO	2.89931	1	up	0.0551
cardiac conduction	GO	2.89931	1	up	0.0551
regulation of execution phase of apoptosis	GO	2.88689	2	up	0.0557
regulation of cyclase activity	GO	2.87752	1	up	0.0563
regulation of cardiac muscle cell membrane potential	GO	2.84949	1	up	0.0579
regulation of heart contraction	GO	2.83687	2	up	0.0586
protein kinase regulator activity	GO	2.8239	2	up	0.0594
intrinsic to endoplasmic reticulum membrane	GO	2.81677	2	up	0.0598
organic acid catabolic process	GO	2.81387	1	up	0.06
regulation of lyase activity	GO	2.80378	1	up	0.0606
cell-substrate adhesion	GO	2.78781	2	up	0.0616
response to mechanical stimulus	GO	2.77501	1	up	0.0623
cortical actin cytoskeleton	GO	2.77168	1	up	0.0626
regulation of intrinsic apoptotic signaling pathway	GO	2.76845	1	up	0.0628
cyclin-dependent protein kinase holoenzyme complex	GO	2.75494	1	up	0.0636
small GTPase regulator activity	GO	2.7529	3	up	0.0637
DNA methylation	GO	2.75006	1	up	0.0639
positive regulation of extrinsic apoptotic signaling pathway	GO	2.7441	1	up	0.0643
positive regulation of chromosome organization	GO	2.72692	1	up	0.0654
multicellular organismal macromolecule metabolic process	GO	2.72159	1	up	0.0658
cilium	GO	2.71846	1	up	0.066
transaminase activity	GO	2.65633	1	up	0.0702
negative regulation of neuron death	GO	2.64134	2	up	0.0713
lysosome	GO	2.63787	3	up	0.0715
signal transduction by p53 class mediator	GO	2.62394	1	up	0.0725
transferase activity, transferring nitrogenous groups	GO	2.617	1	up	0.073
regulation of leukocyte apoptotic process	GO	2.6085	1	up	0.0736
regulation of ion transport	GO	2.60687	4	up	0.0738
axon	GO	2.60239	3	up	0.0741
acid secretion	GO	2.59089	1	up	0.075
sequence-specific DNA binding RNA polymerase II transcription factor activity	GO	2.58879	1	up	0.0751
nucleus localization	GO	2.58754	1	up	0.0752
multicellular organismal metabolic process	GO	2.58557	1	up	0.0754
detection of abiotic stimulus	GO	2.58129	1	up	0.0757
cellular senescence	GO	2.56471	1	up	0.0769
vesicle localization	GO	2.56229	1	up	0.0771
regulation of neural precursor cell proliferation	GO	2.55599	1	up	0.0776
positive regulation of CD4-positive, alpha-beta T cell activation	GO	2.55556	1	up	0.0776
anion binding	GO	2.54619	1	up	0.0784
fat-soluble vitamin metabolic process	GO	2.539	1	up	0.0789
extracellular matrix structural constituent	GO	2.53033	1	up	0.0796
kinase regulator activity	GO	2.52754	2	up	0.0799
antigen processing and presentation of peptide antigen via MHC class I	GO	2.51549	1	up	0.0808
mammary gland lobule development	GO	2.50661	1	up	0.0815
vasoconstriction	GO	2.50356	1	up	0.0818
multicellular organismal response to stress	GO	2.50316	1	up	0.0818
regulation of anti-apoptosis	GO	2.50316	1	up	0.0818
transcriptional repressor complex	GO	2.49716	1	up	0.0823
NAD binding	GO	2.47969	1	up	0.0838
damaged DNA binding	GO	2.46108	1	up	0.0853
oxidoreductase activity, acting on the CH-CH group of donors, NAD or NADP as acceptor	GO	2.45835	1	up	0.0856
extrinsic to plasma membrane	GO	2.44918	1	up	0.0864
regulation of action potential	GO	2.44872	2	up	0.0864
intrinsic to Golgi membrane	GO	2.4416	1	up	0.087
macromolecular complex disassembly	GO	2.43964	1	up	0.0872
regulation of viral reproduction	GO	2.43172	1	up	0.0879
cardiac muscle contraction	GO	2.42733	1	up	0.0883
lung development	GO	2.40827	2	up	0.09
respiratory tube development	GO	2.39641	2	up	0.091
ribonucleoprotein complex biogenesis	GO	2.39146	1	up	0.0915
inclusion body	GO	2.37888	1	up	0.0927
branching morphogenesis of a tube	GO	2.365	2	up	0.0939
positive regulation of reproductive process	GO	2.35417	1	up	0.095
cellular component biogenesis at cellular level	GO	2.33286	1	up	0.097
actin filament	GO	2.31704	1	up	0.0986
digestive tract development	GO	2.30125	1	up	0.1001
nucleosome	GO	2.2886	1	up	0.1014
regulation of extrinsic apoptotic signaling pathway	GO	2.2871	1	up	0.1016
regulation of gliogenesis	GO	2.27696	1	up	0.1026
lactation	GO	2.27681	1	up	0.1026
endoplasmic reticulum unfolded protein response	GO	2.27681	1	up	0.1026
small conjugating protein binding	GO	2.26911	1	up	0.1034
hydro-lyase activity	GO	2.26216	1	up	0.1041
transcription regulatory region sequence-specific DNA binding	GO	2.26173	1	up	0.1042
regulation of CD4-positive, alpha-beta T cell activation	GO	2.24787	1	up	0.1056
embryo implantation	GO	2.23944	1	up	0.1065
polysome	GO	2.22983	1	up	0.1075
response to nutrient	GO	2.22021	1	up	0.1086
G1/S transition checkpoint	GO	2.2116	1	up	0.1095
myosin complex	GO	2.19965	1	up	0.1108
regulation of dendrite morphogenesis	GO	2.19738	1	up	0.1111
eating behavior	GO	2.18965	1	up	0.112
response to virus	GO	2.18566	2	up	0.1124
passive transmembrane transporter activity	GO	2.16833	3	up	0.1144
guanyl-nucleotide exchange factor activity	GO	2.15501	2	up	0.1159
pyrimidine-containing compound metabolic process	GO	2.137	1	up	0.118
regulation of neuron death	GO	2.13535	2	up	0.1182
peptide hormone secretion	GO	2.12431	1	up	0.1195
cellular response to topologically incorrect protein	GO	2.12194	1	up	0.1198
regulation of epidermis development	GO	2.1216	1	up	0.1198
microvillus	GO	2.11005	1	up	0.1212
morphogenesis of a branching structure	GO	2.04941	2	up	0.1288
outer membrane	GO	2.04845	1	up	0.1289
small conjugating protein ligase binding	GO	2.02749	2	up	0.1317
glycoprotein binding	GO	1.99899	1	up	0.1355
striated muscle contraction	GO	1.99565	1	up	0.1359
regulation of vasoconstriction	GO	1.99324	1	up	0.1363
carbon-oxygen lyase activity	GO	1.99229	1	up	0.1364
response to dsRNA	GO	1.98197	1	up	0.1378
regulation of G-protein coupled receptor protein signaling pathway	GO	1.96518	1	up	0.1401
antigen processing and presentation of peptide antigen	GO	1.93527	1	up	0.1444
pyridoxal phosphate binding	GO	1.92456	1	up	0.1459
positive regulation of blood pressure	GO	1.89284	1	up	0.1506
multicellular organism growth	GO	1.89235	1	up	0.1507
body fluid secretion	GO	1.87603	1	up	0.1532
hormone secretion	GO	1.85718	1	up	0.1561
dendrite development	GO	1.84104	1	up	0.1587
neural tube closure	GO	1.81133	1	up	0.1634
gene silencing	GO	1.75544	1	up	0.1728
channel regulator activity	GO	1.7502	1	up	0.1737
primary neural tube formation	GO	1.74933	1	up	0.1739
peripheral nervous system development	GO	1.73891	1	up	0.1757
lymphocyte proliferation	GO	1.73168	1	up	0.177
regulation of G1/S transition of mitotic cell cycle	GO	1.72034	1	up	0.179
mononuclear cell proliferation	GO	1.71444	1	up	0.1801
translation	GO	1.69219	3	up	0.1841
oxidoreductase activity, acting on the CH-CH group of donors	GO	1.68519	1	up	0.1854
isomerase activity	GO	1.65451	1	up	0.1912
phosphoprotein binding	GO	1.64754	1	up	0.1925
postsynaptic membrane	GO	1.63949	1	up	0.1941
stem cell differentiation	GO	1.63851	1	up	0.1943
phosphatase binding	GO	1.62111	1	up	0.1977
cerebral cortex development	GO	1.62044	1	up	0.1978
response to unfolded protein	GO	1.62027	1	up	0.1978
neural tube formation	GO	1.58728	1	up	0.2045
regulation of blood vessel size	GO	1.58206	1	up	0.2056
regulation of tube size	GO	1.56784	1	up	0.2085
cell growth	GO	1.55921	1	up	0.2103
blood circulation	GO	1.55591	2	up	0.211
antigen processing and presentation	GO	1.54373	1	up	0.2136
epithelial cell development	GO	1.51658	1	up	0.2195
synaptic membrane	GO	1.49623	1	up	0.224
circadian rhythm	GO	1.47275	1	up	0.2293
calmodulin binding	GO	1.4464	1	up	0.2354
embryonic epithelial tube formation	GO	1.43636	1	up	0.2378
myelination	GO	1.42185	1	up	0.2413
ensheathment of neurons	GO	1.40043	1	up	0.2465
axon ensheathment	GO	1.40043	1	up	0.2465
helicase activity	GO	1.38554	1	up	0.2502
postsynaptic density	GO	1.34942	1	up	0.2594
dendritic spine head	GO	1.34942	1	up	0.2594
feeding behavior	GO	1.33779	1	up	0.2624
generation of a signal involved in cell-cell signaling	GO	1.29941	1	up	0.2727
unfolded protein binding	GO	1.21986	1	up	0.2953
transcription corepressor activity	GO	1.15667	1	up	0.3145
dendritic spine	GO	1.05835	1	up	0.347
mitochondrion organization	GO	0.711749	1	up	0.4908
nuclear transport	GO	0.681812	1	up	0.5057

## Sheet: DOWN pathways
Bioset vs Biogroups record downloaded from Correlation Engine(2019/12/10 21:05:25)
Bioset: BP_C.vs.BP_TX_CorrEng
Study: 14489R
https://hci.ussc.informatics.illumina.com/c/search/bg/?type=bioset&id=1207744#bgcf=true&dcf=-1&gcmax=500&gcmin=10&taxf=ontologies
Biogroup name	source	Score	common genes	direction	p-value
extracellular matrix	GO	25.7032	12	down	6.9e-12
response to wounding	GO	24.4476	13	down	2.4e-11
proteinaceous extracellular matrix	GO	21.1737	9	down	6.4e-10
fatty acid metabolic process	GO	19.5671	9	down	3.2e-09
regulation of response to external stimulus	GO	19.0246	10	down	5.5e-09
carbohydrate derivative binding	GO	17.9958	7	down	1.5e-08
chemotaxis	GO	17.399	8	down	2.8e-08
taxis	GO	17.3736	8	down	2.8e-08
inflammatory response	GO	16.5148	8	down	6.7e-08
glycosaminoglycan binding	GO	15.2692	6	down	2.3e-07
extracellular matrix organization	GO	14.2671	6	down	6.4e-07
extracellular structure organization	GO	14.2274	6	down	6.6e-07
carboxylic ester hydrolase activity	GO	14.1972	6	down	6.8e-07
cell migration	GO	13.7361	9	down	1.1e-06
cell activation	GO	12.7575	8	down	2.9e-06
basement membrane	GO	11.9358	4	down	6.6e-06
regulation of cysteine-type endopeptidase activity	GO	11.8177	3	down	7.4e-06
regulation of angiogenesis	GO	11.6482	4	down	8.7e-06
protein-lipid complex subunit organization	GO	11.5224	3	down	9.9e-06
plasma lipoprotein particle organization	GO	11.5224	3	down	9.9e-06
carboxylesterase activity	GO	11.4918	4	down	1e-05
regulation of vasculature development	GO	11.4455	4	down	1.1e-05
cellular modified amino acid metabolic process	GO	11.3188	5	down	1.2e-05
apical part of cell	GO	10.994	6	down	1.7e-05
G-protein coupled receptor binding	GO	10.8949	5	down	1.9e-05
lipid biosynthetic process	GO	10.859	7	down	1.9e-05
positive regulation of immune system process	GO	10.7608	6	down	2.1e-05
carboxylic acid transport	GO	10.5742	5	down	2.6e-05
organic acid transport	GO	10.5182	5	down	2.7e-05
regulation of inflammatory response	GO	10.3943	5	down	3.1e-05
regulation of plasma lipoprotein particle levels	GO	10.3626	3	down	3.2e-05
vasculature development	GO	10.1855	7	down	3.8e-05
wound healing	GO	10.0737	5	down	4.2e-05
regulation of mesoderm development	GO	10.0661	2	down	4.2e-05
intestinal absorption	GO	10.0323	2	down	4.4e-05
regulation of protein transport	GO	9.95528	4	down	4.7e-05
phospholipid binding	GO	9.88003	7	down	5.1e-05
transferase activity, transferring acyl groups	GO	9.71898	4	down	6e-05
regulation of cytokine production	GO	9.6454	5	down	6.5e-05
steroid metabolic process	GO	9.62725	5	down	6.6e-05
endothelial cell differentiation	GO	9.49628	3	down	7.5e-05
immune response	GO	9.43551	7	down	8e-05
pallium development	GO	9.38694	2	down	8.4e-05
immune system development	GO	9.38178	7	down	8.4e-05
lipid transporter activity	GO	9.34526	3	down	8.7e-05
fatty acid biosynthetic process	GO	9.34064	4	down	8.8e-05
positive regulation of cysteine-type endopeptidase activity	GO	9.23525	2	down	9.8e-05
positive regulation of immune response	GO	9.12162	3	down	0.0001
regulation of cell fate specification	GO	9.11777	2	down	0.0001
electron carrier activity	GO	9.03383	4	down	0.0001
mesoderm formation	GO	9.0054	3	down	0.0001
lipid transport	GO	8.94863	4	down	0.0001
mesoderm morphogenesis	GO	8.79966	3	down	0.0002
monooxygenase activity	GO	8.69923	3	down	0.0002
regulation of locomotion	GO	8.59508	5	down	0.0002
regulation of cellular component movement	GO	8.53546	5	down	0.0002
oxidoreductase activity, acting on paired donors, with incorporation or reduction of molecular oxygen, reduced flavin or flavoprotein as one donor, and incorporation of one atom of oxygen	GO	8.50793	2	down	0.0002
positive regulation of purine nucleotide biosynthetic process	GO	8.50767	3	down	0.0002
hemopoiesis	GO	8.49969	6	down	0.0002
polysaccharide metabolic process	GO	8.47997	3	down	0.0002
digestive system process	GO	8.42467	2	down	0.0002
regulation of cell adhesion	GO	8.37119	5	down	0.0002
telencephalon development	GO	8.3566	2	down	0.0002
positive regulation of purine nucleotide metabolic process	GO	8.30066	3	down	0.0002
regulation of chemotaxis	GO	8.13016	3	down	0.0003
innate immune response	GO	8.07072	4	down	0.0003
formation of primary germ layer	GO	8.06084	3	down	0.0003
leukocyte migration	GO	8.01161	2	down	0.0003
sulfur compound metabolic process	GO	7.9858	4	down	0.0003
negative regulation of cell differentiation	GO	7.94189	6	down	0.0004
regulation of immune response	GO	7.93958	4	down	0.0004
hemopoietic or lymphoid organ development	GO	7.92517	6	down	0.0004
oxidoreductase activity, acting on a heme group of donors, oxygen as acceptor	GO	7.87367	1	down	0.0004
heme-copper terminal oxidase activity	GO	7.87367	1	down	0.0004
cytochrome-c oxidase activity	GO	7.87367	1	down	0.0004
oxidoreductase activity, acting on a heme group of donors	GO	7.82922	1	down	0.0004
tube morphogenesis	GO	7.80038	5	down	0.0004
sensory organ development	GO	7.77218	5	down	0.0004
developmental growth	GO	7.76182	4	down	0.0004
myeloid leukocyte activation	GO	7.72373	3	down	0.0004
carboxylic acid binding	GO	7.70333	4	down	0.0005
regulation of protein secretion	GO	7.66126	2	down	0.0005
regulation of purine nucleotide biosynthetic process	GO	7.66055	3	down	0.0005
mesoderm development	GO	7.57073	3	down	0.0005
water-soluble vitamin metabolic process	GO	7.56936	2	down	0.0005
digestion	GO	7.51172	2	down	0.0005
monosaccharide transport	GO	7.47515	2	down	0.0006
regulation of behavior	GO	7.39184	3	down	0.0006
sterol metabolic process	GO	7.38631	3	down	0.0006
membrane raft	GO	7.37819	4	down	0.0006
negative regulation of locomotion	GO	7.36407	3	down	0.0006
apical plasma membrane	GO	7.35815	4	down	0.0006
aminoglycan metabolic process	GO	7.3373	2	down	0.0007
determination of heart left/right asymmetry	GO	7.28831	2	down	0.0007
regulation of organ morphogenesis	GO	7.28215	3	down	0.0007
guanyl nucleotide binding	GO	7.27191	5	down	0.0007
forebrain development	GO	7.24921	2	down	0.0007
peptide binding	GO	7.22347	3	down	0.0007
developmental maturation	GO	7.1199	4	down	0.0008
organic acid biosynthetic process	GO	7.11685	4	down	0.0008
regulation of cell morphogenesis	GO	7.08824	4	down	0.0008
organic acid transmembrane transporter activity	GO	7.01744	3	down	0.0009
skeletal system development	GO	6.98381	4	down	0.0009
mitochondrial respiratory chain	GO	6.97573	1	down	0.0009
leukocyte activation	GO	6.9712	5	down	0.0009
mitochondrial inner membrane	GO	6.94251	3	down	0.001
positive regulation of cytokine production	GO	6.89992	3	down	0.001
amino acid transport	GO	6.89557	3	down	0.001
axon guidance	GO	6.89023	3	down	0.001
response to cAMP	GO	6.83783	1	down	0.0011
extracellular matrix binding	GO	6.83637	2	down	0.0011
platelet activation	GO	6.81902	2	down	0.0011
macrophage activation	GO	6.75731	2	down	0.0012
peptidase activator activity	GO	6.74564	2	down	0.0012
drug binding	GO	6.74464	3	down	0.0012
gastrulation	GO	6.74437	3	down	0.0012
amino sugar metabolic process	GO	6.72236	2	down	0.0012
embryonic heart tube development	GO	6.67388	2	down	0.0013
one-carbon metabolic process	GO	6.58187	2	down	0.0014
regulation of protein activation cascade	GO	6.53446	1	down	0.0015
regulation of complement activation	GO	6.53446	1	down	0.0015
retina development in camera-type eye	GO	6.47182	3	down	0.0015
activation of immune response	GO	6.47051	2	down	0.0015
regionalization	GO	6.43278	4	down	0.0016
cell morphogenesis involved in differentiation	GO	6.39461	5	down	0.0017
brain development	GO	6.38779	2	down	0.0017
fatty acid binding	GO	6.37538	2	down	0.0017
mitochondrial membrane	GO	6.37294	3	down	0.0017
positive regulation of secretion	GO	6.34582	2	down	0.0018
proton transport	GO	6.33974	1	down	0.0018
hydrogen transport	GO	6.32998	2	down	0.0018
positive regulation of locomotion	GO	6.32148	3	down	0.0018
organic cyclic compound biosynthetic process	GO	6.27532	4	down	0.0019
oxidoreductase activity, acting on the aldehyde or oxo group of donors	GO	6.26768	2	down	0.0019
tube development	GO	6.23943	5	down	0.002
structural constituent of eye lens	GO	6.22054	1	down	0.002
vitamin binding	GO	6.22036	3	down	0.002
cardiac cell differentiation	GO	6.18404	2	down	0.0021
endocytosis	GO	6.17919	4	down	0.0021
receptor complex	GO	6.17442	3	down	0.0021
dorsal/ventral pattern formation	GO	6.15326	2	down	0.0021
mitochondrial membrane part	GO	6.14443	1	down	0.0021
determination of bilateral symmetry	GO	6.13659	2	down	0.0022
mesodermal cell fate commitment	GO	6.12933	1	down	0.0022
regulation of cardiac muscle cell differentiation	GO	6.12933	1	down	0.0022
negative regulation of chromosome organization	GO	6.11839	2	down	0.0022
specification of symmetry	GO	6.11329	2	down	0.0022
carbohydrate transport	GO	6.09479	2	down	0.0023
sensory perception of light stimulus	GO	6.04408	2	down	0.0024
modified amino acid binding	GO	6.02695	2	down	0.0024
glucosamine-containing compound catabolic process	GO	6.02408	1	down	0.0024
reactive oxygen species metabolic process	GO	6.02366	1	down	0.0024
cell surface receptor signaling pathway involved in heart development	GO	5.99593	1	down	0.0025
mesodermal cell differentiation	GO	5.93538	1	down	0.0026
generation of precursor metabolites and energy	GO	5.88114	4	down	0.0028
muscle cell differentiation	GO	5.86091	3	down	0.0028
regulation of immune effector process	GO	5.83281	2	down	0.0029
cytokine activity	GO	5.82566	3	down	0.003
hydrolase activity, acting on carbon-nitrogen (but not peptide) bonds, in linear amides	GO	5.75862	2	down	0.0032
nuclease activity	GO	5.68943	2	down	0.0034
neuroblast proliferation	GO	5.6779	1	down	0.0034
isoprenoid biosynthetic process	GO	5.66785	1	down	0.0035
molting cycle process	GO	5.65809	2	down	0.0035
hair cycle process	GO	5.65809	2	down	0.0035
oxidoreductase activity, acting on CH-OH group of donors	GO	5.65747	3	down	0.0035
molting cycle	GO	5.58957	2	down	0.0037
hair cycle	GO	5.58957	2	down	0.0037
energy reserve metabolic process	GO	5.51405	2	down	0.004
regulation of cell activation	GO	5.47347	4	down	0.0042
stem cell division	GO	5.47345	1	down	0.0042
glutathione metabolic process	GO	5.45844	2	down	0.0043
response to molecule of bacterial origin	GO	5.39451	3	down	0.0045
pattern specification process	GO	5.39051	4	down	0.0046
skeletal muscle cell differentiation	GO	5.30389	1	down	0.005
regulation of cytokine biosynthetic process	GO	5.29194	2	down	0.005
oxidoreductase activity, acting on paired donors, with incorporation or reduction of molecular oxygen	GO	5.21925	3	down	0.0054
positive regulation of receptor activity	GO	5.21449	1	down	0.0054
vitamin metabolic process	GO	5.20561	2	down	0.0055
lipopolysaccharide binding	GO	5.19263	1	down	0.0056
peptide transport	GO	5.06281	2	down	0.0063
cell cortex part	GO	5.06085	2	down	0.0063
carbohydrate binding	GO	5.0062	3	down	0.0067
regulation of actin polymerization or depolymerization	GO	5.00491	2	down	0.0067
cellular response to decreased oxygen levels	GO	5.00157	1	down	0.0067
cytokine binding	GO	4.98071	2	down	0.0069
guanylate cyclase activity	GO	4.97628	1	down	0.0069
peroxisome	GO	4.97585	2	down	0.0069
microbody	GO	4.97585	2	down	0.0069
antioxidant activity	GO	4.9684	2	down	0.007
peptide receptor activity	GO	4.9672	2	down	0.007
cell-cell adhesion	GO	4.96177	3	down	0.007
blood coagulation	GO	4.96149	2	down	0.007
coagulation	GO	4.96149	2	down	0.007
response to bacterium	GO	4.95939	4	down	0.007
hemostasis	GO	4.94016	2	down	0.0072
protein transporter activity	GO	4.93507	2	down	0.0072
oxygen transporter activity	GO	4.92765	1	down	0.0072
segmentation	GO	4.92183	2	down	0.0073
leukocyte chemotaxis	GO	4.9133	1	down	0.0073
amine transmembrane transporter activity	GO	4.89961	1	down	0.0074
regulation of extent of cell growth	GO	4.89954	1	down	0.0075
complement activation, classical pathway	GO	4.89275	1	down	0.0075
sodium ion transmembrane transport	GO	4.87641	2	down	0.0076
cytokine production	GO	4.86913	2	down	0.0077
SMAD binding	GO	4.85173	2	down	0.0078
transferase activity, transferring acyl groups other than amino-acyl groups	GO	4.85155	2	down	0.0078
negative regulation of growth	GO	4.84426	3	down	0.0079
oxygen transport	GO	4.83269	1	down	0.008
neural precursor cell proliferation	GO	4.80079	1	down	0.0082
regulation of lymphocyte activation	GO	4.77741	3	down	0.0084
acylglycerol metabolic process	GO	4.76852	2	down	0.0085
multicellular organismal reproductive behavior	GO	4.74611	1	down	0.0087
lipid catabolic process	GO	4.74606	3	down	0.0087
cell fate commitment	GO	4.72035	3	down	0.0089
neutral lipid metabolic process	GO	4.70432	2	down	0.0091
regulation of Wnt receptor signaling pathway	GO	4.68757	2	down	0.0092
fat cell differentiation	GO	4.68679	2	down	0.0092
mating behavior	GO	4.65554	1	down	0.0095
regulation of NIK/NF-kappaB cascade	GO	4.6501	1	down	0.0096
complement activation	GO	4.6501	1	down	0.0096
humoral immune response mediated by circulating immunoglobulin	GO	4.62355	1	down	0.0098
heart morphogenesis	GO	4.61338	2	down	0.0099
embryonic morphogenesis	GO	4.59219	4	down	0.0101
cellular response to nutrient levels	GO	4.58968	2	down	0.0102
protein activation cascade	GO	4.5725	1	down	0.0103
response to toxin	GO	4.55309	2	down	0.0105
spinal cord development	GO	4.49573	1	down	0.0112
palate development	GO	4.49573	1	down	0.0112
neuronal cell body	GO	4.48998	4	down	0.0112
negative regulation of neurogenesis	GO	4.47751	2	down	0.0114
protein phosphatase inhibitor activity	GO	4.42493	1	down	0.012
cartilage development	GO	4.42109	2	down	0.012
NIK/NF-kappaB cascade	GO	4.41495	1	down	0.0121
regulation of cell size	GO	4.40343	1	down	0.0122
gas transport	GO	4.3995	1	down	0.0123
hydrolase activity, acting on carbon-nitrogen (but not peptide) bonds	GO	4.39789	2	down	0.0123
learning	GO	4.39078	2	down	0.0124
microbody part	GO	4.36252	1	down	0.0127
peroxisomal part	GO	4.36252	1	down	0.0127
estrogen metabolic process	GO	4.35325	1	down	0.0129
chemokine binding	GO	4.34256	1	down	0.013
carbohydrate transmembrane transporter activity	GO	4.33747	1	down	0.0131
phosphatase inhibitor activity	GO	4.32708	1	down	0.0132
amine transport	GO	4.2965	1	down	0.0136
detection of biotic stimulus	GO	4.26928	1	down	0.014
regulation of I-kappaB kinase/NF-kappaB cascade	GO	4.26806	2	down	0.014
appendage morphogenesis	GO	4.26584	2	down	0.014
limb morphogenesis	GO	4.26584	2	down	0.014
peptide metabolic process	GO	4.26304	2	down	0.0141
regulation of mononuclear cell proliferation	GO	4.24301	2	down	0.0144
carbohydrate transporter activity	GO	4.2428	1	down	0.0144
protein self-association	GO	4.21353	1	down	0.0148
inner ear morphogenesis	GO	4.19941	1	down	0.015
amino acid binding	GO	4.19782	2	down	0.015
cellular response to extracellular stimulus	GO	4.19737	2	down	0.015
mating	GO	4.18289	1	down	0.0153
regulation of axonogenesis	GO	4.17914	1	down	0.0153
chylomicron	GO	4.1671	1	down	0.0155
metallopeptidase activity	GO	4.16319	2	down	0.0156
appendage development	GO	4.16087	2	down	0.0156
phosphorus-oxygen lyase activity	GO	4.14775	1	down	0.0158
regulation of carbohydrate metabolic process	GO	4.13911	2	down	0.0159
cyclase activity	GO	4.10553	1	down	0.0165
negative regulation of cysteine-type endopeptidase activity	GO	4.10327	1	down	0.0165
regulation of ossification	GO	4.09404	2	down	0.0167
lymphocyte mediated immunity	GO	4.08597	2	down	0.0168
vascular smooth muscle cell differentiation	GO	4.07799	1	down	0.0169
drug metabolic process	GO	4.076	1	down	0.017
connective tissue development	GO	4.07388	2	down	0.017
cellular divalent inorganic cation homeostasis	GO	4.0511	3	down	0.0174
external side of plasma membrane	GO	4.05095	3	down	0.0174
peptide transporter activity	GO	4.04501	1	down	0.0175
visual behavior	GO	4.0338	1	down	0.0177
humoral immune response	GO	4.01651	1	down	0.018
carbohydrate catabolic process	GO	4.01648	1	down	0.018
anatomical structure regression	GO	4.01626	1	down	0.018
ear morphogenesis	GO	4.01333	1	down	0.0181
SH3 domain binding	GO	4.00695	2	down	0.0182
regulation of renal sodium excretion	GO	4.00347	1	down	0.0183
erythrocyte development	GO	3.9778	1	down	0.0187
protein phosphatase regulator activity	GO	3.96696	1	down	0.0189
activation of innate immune response	GO	3.96695	1	down	0.0189
pyridine-containing compound metabolic process	GO	3.94036	1	down	0.0194
divalent inorganic cation homeostasis	GO	3.92506	3	down	0.0197
mitochondrial matrix	GO	3.92411	1	down	0.0198
negative regulation of peptidyl-lysine acetylation	GO	3.92184	1	down	0.0198
neurotransmitter:sodium symporter activity	GO	3.87849	1	down	0.0207
salivary gland morphogenesis	GO	3.87209	1	down	0.0208
regulation of endocytosis	GO	3.87148	1	down	0.0208
organ formation	GO	3.8664	1	down	0.0209
cellular nitrogen compound biosynthetic process	GO	3.86578	3	down	0.0209
neural tube development	GO	3.86417	1	down	0.021
hydrolase activity, hydrolyzing O-glycosyl compounds	GO	3.8469	1	down	0.0213
nucleoside metabolic process	GO	3.84451	3	down	0.0214
response to inorganic substance	GO	3.83645	3	down	0.0216
growth factor binding	GO	3.83297	2	down	0.0216
positive regulation of neurogenesis	GO	3.81446	2	down	0.022
cellular lipid catabolic process	GO	3.80588	2	down	0.0222
adaptive immune response based on somatic recombination of immune receptors built from immunoglobulin superfamily domains	GO	3.79428	2	down	0.0225
phosphatase regulator activity	GO	3.79005	1	down	0.0226
response to other organism	GO	3.78975	4	down	0.0226
lymphocyte activation	GO	3.77792	3	down	0.0229
folic acid binding	GO	3.76306	1	down	0.0232
RNA polymerase II distal enhancer sequence-specific DNA binding	GO	3.75658	1	down	0.0234
multi-organism behavior	GO	3.75473	1	down	0.0234
energy derivation by oxidation of organic compounds	GO	3.7445	2	down	0.0236
single-organism reproductive behavior	GO	3.72064	1	down	0.0242
actin polymerization or depolymerization	GO	3.70391	1	down	0.0246
thymic T cell selection	GO	3.69783	1	down	0.0248
inner ear development	GO	3.69102	1	down	0.0249
lymph vessel morphogenesis	GO	3.67921	1	down	0.0252
lymphangiogenesis	GO	3.67921	1	down	0.0252
activin binding	GO	3.67921	1	down	0.0252
neurotransmitter transporter activity	GO	3.6696	1	down	0.0255
oxidoreductase activity, acting on the CH-NH group of donors, NAD or NADP as acceptor	GO	3.66618	1	down	0.0256
nitric oxide metabolic process	GO	3.65809	1	down	0.0258
adaptive immune response	GO	3.6568	2	down	0.0258
leukocyte mediated immunity	GO	3.6568	2	down	0.0258
cell fate determination	GO	3.63077	1	down	0.0265
hydrolase activity, acting on glycosyl bonds	GO	3.61084	1	down	0.027
dendrite	GO	3.59238	3	down	0.0275
peptide hormone binding	GO	3.57573	1	down	0.028
response to hypoxia	GO	3.56864	2	down	0.0282
single-organism behavior	GO	3.56449	3	down	0.0283
response to decreased oxygen levels	GO	3.5609	2	down	0.0284
folic acid-containing compound metabolic process	GO	3.55646	1	down	0.0285
transcription coactivator activity	GO	3.54924	1	down	0.0287
purine-containing compound biosynthetic process	GO	3.54403	2	down	0.0289
regulation of endothelial cell apoptotic process	GO	3.53522	1	down	0.0292
organ growth	GO	3.51794	1	down	0.0297
regulation of Notch signaling pathway	GO	3.51794	1	down	0.0297
regulation of small GTPase mediated signal transduction	GO	3.5054	1	down	0.03
negative regulation of cell motility	GO	3.4843	2	down	0.0307
cytokine secretion	GO	3.47288	1	down	0.031
neuron maturation	GO	3.47029	1	down	0.0311
exocrine system development	GO	3.45967	1	down	0.0314
myeloid cell differentiation	GO	3.45952	2	down	0.0314
anterior/posterior pattern specification	GO	3.45378	2	down	0.0316
ATP metabolic process	GO	3.44777	3	down	0.0318
reproductive behavior	GO	3.42032	1	down	0.0327
T cell selection	GO	3.41425	1	down	0.0329
negative regulation of cellular component movement	GO	3.4142	2	down	0.0329
cellular response to vascular endothelial growth factor stimulus	GO	3.40377	1	down	0.0332
membrane invagination	GO	3.37912	1	down	0.0341
endoplasmic reticulum-Golgi intermediate compartment	GO	3.37245	1	down	0.0343
learning or memory	GO	3.35876	2	down	0.0348
muscle organ development	GO	3.34523	1	down	0.0353
glial cell development	GO	3.34456	1	down	0.0353
embryonic organ morphogenesis	GO	3.33671	1	down	0.0356
macroautophagy	GO	3.32944	1	down	0.0358
hair follicle maturation	GO	3.32909	1	down	0.0358
tissue regeneration	GO	3.31902	1	down	0.0362
lymphocyte differentiation	GO	3.29903	2	down	0.0369
regulation of DNA biosynthetic process	GO	3.28006	1	down	0.0376
anion transport	GO	3.25598	2	down	0.0385
response to metal ion	GO	3.25056	2	down	0.0388
response to nutrient levels	GO	3.24856	2	down	0.0388
negative regulation of gene expression, epigenetic	GO	3.23855	1	down	0.0392
olefin biosynthetic process	GO	3.22582	1	down	0.0397
peptide biosynthetic process	GO	3.22582	1	down	0.0397
immune response-activating signal transduction	GO	3.21385	1	down	0.0402
myofibril assembly	GO	3.21114	1	down	0.0403
oxidoreductase activity, acting on the CH-NH group of donors	GO	3.21105	1	down	0.0403
brush border	GO	3.18835	1	down	0.0412
methyltransferase activity	GO	3.15547	2	down	0.0426
retina vasculature development in camera-type eye	GO	3.12905	1	down	0.0438
immune response-regulating signaling pathway	GO	3.11446	1	down	0.0444
enhancer sequence-specific DNA binding	GO	3.1134	1	down	0.0444
G-protein alpha-subunit binding	GO	3.08246	1	down	0.0458
transferase activity, transferring one-carbon groups	GO	3.08185	2	down	0.0459
sulfur amino acid metabolic process	GO	3.08149	1	down	0.0459
response to extracellular stimulus	GO	3.05023	2	down	0.0473
oxidoreductase activity, acting on the aldehyde or oxo group of donors, NAD or NADP as acceptor	GO	3.04489	1	down	0.0476
pteridine-containing compound metabolic process	GO	3.04489	1	down	0.0476
iron-sulfur cluster binding	GO	3.02988	1	down	0.0483
metal cluster binding	GO	3.02988	1	down	0.0483
transcription cofactor activity	GO	3.01208	1	down	0.0492
cyclic nucleotide binding	GO	3.00644	1	down	0.0495
regulation of peptidyl-lysine acetylation	GO	3.00276	1	down	0.0497
oxidative phosphorylation	GO	2.96746	1	down	0.0514
protein disulfide oxidoreductase activity	GO	2.96391	1	down	0.0516
cellular potassium ion transport	GO	2.95889	1	down	0.0519
potassium ion transmembrane transport	GO	2.95889	1	down	0.0519
transcription factor binding transcription factor activity	GO	2.95623	1	down	0.052
nucleoside phosphate biosynthetic process	GO	2.94684	2	down	0.0525
embryonic organ development	GO	2.93366	1	down	0.0532
cellular alkene metabolic process	GO	2.9327	1	down	0.0533
cofactor catabolic process	GO	2.9301	1	down	0.0534
purinergic nucleotide receptor signaling pathway	GO	2.92261	1	down	0.0538
protein binding transcription factor activity	GO	2.91982	1	down	0.0539
purine-containing compound catabolic process	GO	2.90613	3	down	0.0547
olefin metabolic process	GO	2.89733	1	down	0.0552
odontogenesis	GO	2.89489	1	down	0.0553
immune effector process	GO	2.88947	2	down	0.0556
deacetylase activity	GO	2.85942	1	down	0.0573
pigmentation	GO	2.85575	1	down	0.0575
detection of external stimulus	GO	2.84973	1	down	0.0579
somatic diversification of immunoglobulins	GO	2.8453	1	down	0.0581
organophosphate biosynthetic process	GO	2.84419	2	down	0.0582
glial cell differentiation	GO	2.84209	1	down	0.0583
basal plasma membrane	GO	2.81397	1	down	0.06
purinergic receptor activity	GO	2.79295	1	down	0.0612
leukocyte differentiation	GO	2.74203	2	down	0.0644
purinergic receptor signaling pathway	GO	2.73426	1	down	0.0649
carbohydrate derivative transport	GO	2.72837	1	down	0.0653
somatic diversification of immune receptors via germline recombination within a single locus	GO	2.7115	1	down	0.0664
collagen binding	GO	2.70949	1	down	0.0666
disulfide oxidoreductase activity	GO	2.70613	1	down	0.0668
apicolateral plasma membrane	GO	2.70548	1	down	0.0668
gliogenesis	GO	2.69275	1	down	0.0677
methylation	GO	2.69249	2	down	0.0677
protein localization to plasma membrane	GO	2.64997	1	down	0.0707
monosaccharide binding	GO	2.64185	1	down	0.0712
blood vessel remodeling	GO	2.63288	1	down	0.0719
somatic diversification of immune receptors	GO	2.62239	1	down	0.0726
endosome	GO	2.62073	2	down	0.0727
cellular modified amino acid biosynthetic process	GO	2.5769	1	down	0.076
peptide secretion	GO	2.56073	1	down	0.0772
vacuole organization	GO	2.54208	1	down	0.0787
cellular response to starvation	GO	2.52126	1	down	0.0804
exopeptidase activity	GO	2.50316	1	down	0.0818
response to starvation	GO	2.46137	1	down	0.0853
aromatic compound biosynthetic process	GO	2.46036	2	down	0.0854
tube formation	GO	2.45623	1	down	0.0858
carbohydrate biosynthetic process	GO	2.45175	1	down	0.0861
endoplasmic reticulum lumen	GO	2.43964	1	down	0.0872
NADP binding	GO	2.42973	1	down	0.0881
male gamete generation	GO	2.42519	2	down	0.0885
cell projection membrane	GO	2.39617	1	down	0.0911
lipid particle	GO	2.39192	1	down	0.0915
core promoter binding	GO	2.36911	1	down	0.0936
autophagy	GO	2.36516	1	down	0.0939
adult locomotory behavior	GO	2.33071	1	down	0.0972
defense response to Gram-positive bacterium	GO	2.32287	1	down	0.098
regulation of reactive oxygen species metabolic process	GO	2.31243	1	down	0.099
neurotransmitter transport	GO	2.26626	1	down	0.1037
lyase activity	GO	2.25388	1	down	0.105
regulation of multicellular organism growth	GO	2.2486	1	down	0.1055
RNA polymerase II transcription factor binding	GO	2.23805	1	down	0.1067
vesicle organization	GO	2.232	1	down	0.1073
oxidoreductase activity, acting on a sulfur group of donors	GO	2.21783	1	down	0.1088
sulfur compound biosynthetic process	GO	2.21521	1	down	0.1091
striated muscle cell development	GO	2.18153	1	down	0.1129
cytosolic part	GO	2.16741	1	down	0.1145
cell redox homeostasis	GO	2.11122	1	down	0.1211
protein localization to membrane	GO	2.0907	1	down	0.1236
response to drug	GO	2.0595	1	down	0.1275
lamellipodium	GO	2.05386	1	down	0.1282
muscle contraction	GO	2.04538	1	down	0.1293
translation initiation factor activity	GO	2.03971	1	down	0.1301
RNA polymerase II regulatory region sequence-specific DNA binding	GO	2.01073	1	down	0.1339
embryonic appendage morphogenesis	GO	1.98692	1	down	0.1371
muscle cell development	GO	1.97283	1	down	0.1391
endosomal transport	GO	1.97234	1	down	0.1391
oxidoreductase activity, acting on NADH or NADPH	GO	1.97225	1	down	0.1391
flavin adenine dinucleotide binding	GO	1.95809	1	down	0.1411
vesicle membrane	GO	1.95062	1	down	0.1422
adult behavior	GO	1.92764	1	down	0.1455
RNA polymerase II regulatory region DNA binding	GO	1.9213	1	down	0.1464
ion channel activity	GO	1.90564	2	down	0.1487
stem cell maintenance	GO	1.8698	1	down	0.1542
development of primary male sexual characteristics	GO	1.82655	1	down	0.161
stem cell development	GO	1.81188	1	down	0.1633
cell activation involved in immune response	GO	1.761	1	down	0.1719
leukocyte activation involved in immune response	GO	1.761	1	down	0.1719
male sex differentiation	GO	1.7527	1	down	0.1733
protein N-terminus binding	GO	1.74161	1	down	0.1752
tissue remodeling	GO	1.73526	1	down	0.1764
mesenchymal cell development	GO	1.69378	1	down	0.1838
T cell activation	GO	1.67692	1	down	0.1869
translation factor activity, nucleic acid binding	GO	1.6579	1	down	0.1905
nuclear membrane	GO	1.64274	1	down	0.1934
phosphatidylinositol binding	GO	1.62823	1	down	0.1963
mesenchymal cell differentiation	GO	1.58496	1	down	0.205
regulation of myeloid cell differentiation	GO	1.56403	1	down	0.2093
B cell activation	GO	1.56253	1	down	0.2096
guanosine-containing compound catabolic process	GO	1.55215	1	down	0.2118
response to organic cyclic compound	GO	1.52565	1	down	0.2175
regulation of gene expression, epigenetic	GO	1.52377	1	down	0.2179
lipid modification	GO	1.4884	1	down	0.2257
response to acid	GO	1.48145	1	down	0.2273
guanosine-containing compound metabolic process	GO	1.46074	1	down	0.2321
regulation of blood pressure	GO	1.30094	1	down	0.2723
defense response to bacterium	GO	1.2287	1	down	0.2927
divalent inorganic cation transport	GO	1.19533	1	down	0.3026
