# Supplementary material for: An NKX2-1/ERK/WNT feedback loop modulates gastric identity and response to targeted therapy in lung adenocarcinoma
Source: eLife. 2021 Apr 6;10:e66788. doi: 10.7554/eLife.66788 (PMC8102067; doi:10.7554/eLife.66788)
Supplement: Supplementary file 6. [file elife-66788-supp6.xlsx]

## Sheet: Summary
Supplementary File 6 - BPN C vs. BPN Tx GO analysis by Correlation Engine

## Sheet: UP pathways
Bioset vs Biogroups record downloaded from Correlation Engine(2019/12/10 21:09:16)
Bioset: BPN_C.vs.BPN_TX_CorrEng
Study: 14489R
https://hci.ussc.informatics.illumina.com/c/search/bg/?type=bioset&id=1207753#bgcf=true&dcf=1&gcmax=500&gcmin=10&taxf=ontologies
Biogroup name	source	Score	common genes	direction	p-value
extracellular matrix	GO	46.9638	24	up	4e-21
proteinaceous extracellular matrix	GO	46.7565	23	up	4.9e-21
vasculature development	GO	23.8725	16	up	4.3e-11
tissue morphogenesis	GO	23.2808	16	up	7.7e-11
regulation of vasculature development	GO	19.5813	10	up	3.1e-09
basement membrane	GO	18.7325	8	up	7.3e-09
serine-type peptidase activity	GO	18.0671	10	up	1.4e-08
serine hydrolase activity	GO	17.9298	10	up	1.6e-08
tube development	GO	17.8996	13	up	1.7e-08
axis specification	GO	17.835	7	up	1.8e-08
negative regulation of cell differentiation	GO	17.5722	13	up	2.3e-08
positive regulation of cytokine production	GO	17.5224	9	up	2.5e-08
regulation of angiogenesis	GO	17.4275	9	up	2.7e-08
anchored to membrane	GO	17.2865	8	up	3.1e-08
negative regulation of multicellular organismal process	GO	17.1376	11	up	3.6e-08
pattern specification process	GO	17.0512	12	up	3.9e-08
cytokine activity	GO	16.7719	9	up	5.2e-08
metallopeptidase activity	GO	16.5861	9	up	6.3e-08
eye morphogenesis	GO	16.5813	8	up	6.3e-08
female sex differentiation	GO	16.1732	7	up	9.5e-08
connexon complex	GO	16.103	4	up	1e-07
sensory organ development	GO	16.1027	13	up	1e-07
embryonic morphogenesis	GO	16.0488	13	up	1.1e-07
epithelial cell differentiation	GO	15.8687	9	up	1.3e-07
negative regulation of cell proliferation	GO	15.7439	13	up	1.5e-07
embryonic organ development	GO	15.5239	11	up	1.8e-07
regulation of immune response	GO	15.3067	11	up	2.3e-07
cell proliferation	GO	15.2382	11	up	2.4e-07
regulation of defense response	GO	15.0755	10	up	2.8e-07
lung development	GO	14.9372	8	up	3.3e-07
respiratory tube development	GO	14.8425	8	up	3.6e-07
regulation of MAPK cascade	GO	14.4194	12	up	5.5e-07
hormone metabolic process	GO	14.295	7	up	6.2e-07
cellular modified amino acid metabolic process	GO	14.2039	7	up	6.8e-07
sex differentiation	GO	13.9901	8	up	8.4e-07
reproductive structure development	GO	13.6	8	up	1.2e-06
reproductive system development	GO	13.6	8	up	1.2e-06
gonad development	GO	13.5275	7	up	1.3e-06
morphogenesis of an epithelium	GO	13.5164	10	up	1.3e-06
regionalization	GO	13.5031	9	up	1.4e-06
urogenital system development	GO	13.4951	8	up	1.4e-06
development of primary female sexual characteristics	GO	13.4206	6	up	1.5e-06
collagen	GO	13.1806	6	up	1.9e-06
biomineral tissue development	GO	13.1776	5	up	1.9e-06
keratinocyte differentiation	GO	13.1663	5	up	1.9e-06
keratinization	GO	13.1281	4	up	2e-06
kidney development	GO	12.9591	7	up	2.4e-06
negative regulation of transport	GO	12.9178	9	up	2.5e-06
rhythmic process	GO	12.8219	7	up	2.7e-06
regulation of secretion	GO	12.4734	11	up	3.8e-06
development of primary sexual characteristics	GO	12.4422	7	up	3.9e-06
embryonic organ morphogenesis	GO	12.3161	8	up	4.5e-06
peptide transporter activity	GO	12.2297	3	up	4.9e-06
epidermal cell differentiation	GO	12.1976	5	up	5e-06
brain development	GO	12.1485	10	up	5.3e-06
regulation of cytokine production	GO	12.0588	9	up	5.8e-06
regulation of inflammatory response	GO	11.8946	7	up	6.8e-06
heart development	GO	11.7669	9	up	7.8e-06
negative regulation of immune system process	GO	11.4277	7	up	1.1e-05
extracellular matrix binding	GO	11.2398	4	up	1.3e-05
peptide metabolic process	GO	10.9858	5	up	1.7e-05
vacuole	GO	10.7562	8	up	2.1e-05
lung alveolus development	GO	10.6771	4	up	2.3e-05
glycoprotein biosynthetic process	GO	10.6172	6	up	2.4e-05
epithelial cell proliferation	GO	10.5399	4	up	2.6e-05
exopeptidase activity	GO	10.4002	5	up	3e-05
amino acid binding	GO	10.2615	5	up	3.5e-05
regulation of JNK cascade	GO	10.2055	5	up	3.7e-05
lipid transport	GO	10.1283	6	up	4e-05
response to extracellular stimulus	GO	9.75963	7	up	5.8e-05
carboxylic acid binding	GO	9.68873	6	up	6.2e-05
termination of G-protein coupled receptor signaling pathway	GO	9.62553	3	up	6.6e-05
behavior	GO	9.61541	8	up	6.7e-05
multicellular organismal catabolic process	GO	9.60752	2	up	6.7e-05
proton transport	GO	9.55216	5	up	7.1e-05
hydrogen transport	GO	9.50576	5	up	7.4e-05
fluid transport	GO	9.44144	3	up	7.9e-05
replacement ossification	GO	9.35815	3	up	8.6e-05
muscle contraction	GO	9.35092	5	up	8.7e-05
regulation of vasodilation	GO	9.33385	2	up	8.8e-05
negative regulation of angiogenesis	GO	9.32415	4	up	8.9e-05
carboxylic acid transport	GO	9.20868	6	up	0.0001
placenta development	GO	9.16369	5	up	0.0001
organic acid transport	GO	9.14457	6	up	0.0001
secretion	GO	9.14329	8	up	0.0001
transmission of nerve impulse	GO	9.13384	9	up	0.0001
anterior/posterior pattern specification	GO	9.11809	6	up	0.0001
acute inflammatory response	GO	9.08055	3	up	0.0001
carboxylesterase activity	GO	9.07517	4	up	0.0001
basolateral plasma membrane	GO	9.06638	7	up	0.0001
morphogenesis of embryonic epithelium	GO	9.04998	5	up	0.0001
cofactor binding	GO	9.03831	7	up	0.0001
regulation of G-protein coupled receptor protein signaling pathway	GO	9.03742	4	up	0.0001
amine catabolic process	GO	8.89955	2	up	0.0001
multicellular organismal signaling	GO	8.84186	9	up	0.0001
negative regulation of leukocyte apoptotic process	GO	8.80427	3	up	0.0002
cellular biogenic amine metabolic process	GO	8.75556	3	up	0.0002
ovulation cycle process	GO	8.63084	4	up	0.0002
multicellular organismal macromolecule metabolic process	GO	8.59039	2	up	0.0002
carbohydrate derivative biosynthetic process	GO	8.51388	6	up	0.0002
oxygen binding	GO	8.43808	2	up	0.0002
ovulation cycle	GO	8.43799	4	up	0.0002
extracellular matrix structural constituent	GO	8.39865	3	up	0.0002
ovarian follicle development	GO	8.35581	3	up	0.0002
response to nutrient levels	GO	8.32211	6	up	0.0002
multicellular organismal metabolic process	GO	8.30603	2	up	0.0002
perinuclear region of cytoplasm	GO	8.3011	8	up	0.0002
carboxylic ester hydrolase activity	GO	8.20553	5	up	0.0003
passive transmembrane transporter activity	GO	8.12621	8	up	0.0003
dorsal/ventral pattern formation	GO	8.12374	4	up	0.0003
apical part of cell	GO	8.07941	7	up	0.0003
indole-containing compound metabolic process	GO	8.06444	2	up	0.0003
cellular modified amino acid biosynthetic process	GO	8.05979	3	up	0.0003
vacuolar proton-transporting V-type ATPase complex	GO	7.98171	2	up	0.0003
regulation of cell division	GO	7.97536	3	up	0.0003
transferase activity, transferring glycosyl groups	GO	7.97267	6	up	0.0003
digestive system process	GO	7.91612	3	up	0.0004
anterior/posterior axis specification	GO	7.91366	3	up	0.0004
cytolysis	GO	7.82922	1	up	0.0004
positive regulation of purine nucleotide biosynthetic process	GO	7.78977	2	up	0.0004
actin binding	GO	7.70754	7	up	0.0004
female pregnancy	GO	7.69642	4	up	0.0005
oxidoreductase activity, acting on the aldehyde or oxo group of donors	GO	7.67926	3	up	0.0005
regulation of T cell migration	GO	7.67853	2	up	0.0005
developmental growth	GO	7.6638	5	up	0.0005
positive regulation of purine nucleotide metabolic process	GO	7.65019	2	up	0.0005
multicellular organismal response to stress	GO	7.58691	2	up	0.0005
vitamin binding	GO	7.57814	4	up	0.0005
aromatic amino acid family metabolic process	GO	7.56621	2	up	0.0005
GTPase regulator activity	GO	7.54469	7	up	0.0005
HMG box domain binding	GO	7.54262	2	up	0.0005
retinal binding	GO	7.5288	2	up	0.0005
synaptic transmission	GO	7.42918	7	up	0.0006
regulation of leukocyte apoptotic process	GO	7.42449	3	up	0.0006
terpenoid metabolic process	GO	7.41037	3	up	0.0006
inner ear morphogenesis	GO	7.39686	4	up	0.0006
fat-soluble vitamin metabolic process	GO	7.34703	3	up	0.0006
organic acid catabolic process	GO	7.23907	3	up	0.0007
proton-transporting two-sector ATPase complex	GO	7.23603	3	up	0.0007
protein C-terminus binding	GO	7.22848	4	up	0.0007
response to oxidative stress	GO	7.20897	5	up	0.0007
endothelial cell proliferation	GO	7.12203	2	up	0.0008
multi-organism reproductive process	GO	7.10474	5	up	0.0008
retina development in camera-type eye	GO	7.0805	4	up	0.0008
proton-transporting V-type ATPase complex	GO	7.04026	2	up	0.0009
neuron development	GO	7.00058	8	up	0.0009
regulation of neurological system process	GO	6.96724	6	up	0.0009
ERBB signaling pathway	GO	6.95953	2	up	0.0009
regulation of lymphocyte migration	GO	6.95135	2	up	0.001
phosphoprotein phosphatase activity	GO	6.9501	3	up	0.001
response to reactive oxygen species	GO	6.93856	2	up	0.001
regulation of epithelial cell differentiation involved in kidney development	GO	6.92021	2	up	0.001
striated muscle contraction	GO	6.90666	3	up	0.001
regeneration	GO	6.88545	3	up	0.001
ovulation	GO	6.85561	2	up	0.0011
coenzyme binding	GO	6.82163	5	up	0.0011
mesodermal cell fate commitment	GO	6.8055	2	up	0.0011
glutathione binding	GO	6.79976	2	up	0.0011
oligopeptide binding	GO	6.79976	2	up	0.0011
water transmembrane transporter activity	GO	6.78554	2	up	0.0011
carbohydrate metabolic process	GO	6.72044	8	up	0.0012
chemical homeostasis within a tissue	GO	6.70422	2	up	0.0012
hormone receptor binding	GO	6.69028	2	up	0.0012
response to nutrient	GO	6.66016	4	up	0.0013
gliogenesis	GO	6.65112	4	up	0.0013
regulation of immune effector process	GO	6.64621	5	up	0.0013
GTPase activator activity	GO	6.60279	5	up	0.0014
aminoglycan metabolic process	GO	6.59073	3	up	0.0014
NAD binding	GO	6.57452	3	up	0.0014
endoderm development	GO	6.51176	3	up	0.0015
vasculogenesis	GO	6.48076	3	up	0.0015
response to molecule of bacterial origin	GO	6.47543	5	up	0.0015
dendrite	GO	6.46857	4	up	0.0016
renal tubule morphogenesis	GO	6.44486	2	up	0.0016
mesodermal cell differentiation	GO	6.41071	2	up	0.0016
isoprenoid metabolic process	GO	6.31604	3	up	0.0018
channel inhibitor activity	GO	6.3069	2	up	0.0018
regulation of cell activation	GO	6.27402	6	up	0.0019
vitamin metabolic process	GO	6.23168	3	up	0.002
external side of plasma membrane	GO	6.18847	5	up	0.0021
regulation of endocytosis	GO	6.17325	4	up	0.0021
renal system process involved in regulation of blood volume	GO	6.16978	1	up	0.0021
regulation of circadian rhythm	GO	6.15209	2	up	0.0021
channel regulator activity	GO	6.13449	3	up	0.0022
basal lamina	GO	6.13182	2	up	0.0022
respiratory gaseous exchange	GO	6.12301	2	up	0.0022
regulation of neurogenesis	GO	6.1189	7	up	0.0022
stem cell differentiation	GO	6.05728	4	up	0.0023
osteoblast development	GO	6.05302	1	up	0.0024
renal tubule development	GO	6.04152	2	up	0.0024
apical plasma membrane	GO	6.01626	5	up	0.0024
regulation of lymphocyte activation	GO	6.00989	5	up	0.0025
segmentation	GO	6.00737	3	up	0.0025
epithelial cell development	GO	5.96969	3	up	0.0026
regulation of embryonic development	GO	5.93254	3	up	0.0027
regulation of urine volume	GO	5.92888	1	up	0.0027
protein binding, bridging	GO	5.90279	2	up	0.0027
regulation of gliogenesis	GO	5.8757	3	up	0.0028
retinoid binding	GO	5.81392	2	up	0.003
fibrillar collagen	GO	5.77308	1	up	0.0031
glycoprotein binding	GO	5.73876	2	up	0.0032
embryonic axis specification	GO	5.72109	2	up	0.0033
cytokine production	GO	5.67939	3	up	0.0034
regulation of circadian sleep/wake cycle	GO	5.67791	1	up	0.0034
proton-transporting two-sector ATPase complex, proton-transporting domain	GO	5.67727	2	up	0.0034
negative regulation of neurogenesis	GO	5.65299	3	up	0.0035
regulation of anti-apoptosis	GO	5.63449	2	up	0.0036
regulation of renal sodium excretion	GO	5.62393	1	up	0.0036
acid secretion	GO	5.6133	2	up	0.0036
isoprenoid binding	GO	5.61245	2	up	0.0037
regulation of transmission of nerve impulse	GO	5.61002	5	up	0.0037
translation	GO	5.59726	7	up	0.0037
regulation of synapse assembly	GO	5.58924	2	up	0.0037
regulation of reproductive process	GO	5.57845	4	up	0.0038
structural constituent of cytoskeleton	GO	5.57648	2	up	0.0038
circadian sleep/wake cycle	GO	5.57273	1	up	0.0038
sensory perception of mechanical stimulus	GO	5.56542	3	up	0.0038
organ formation	GO	5.56053	2	up	0.0038
hydrolase activity, acting on carbon-nitrogen (but not peptide) bonds	GO	5.55021	3	up	0.0039
cellular aldehyde metabolic process	GO	5.54981	2	up	0.0039
regulation of neuron differentiation	GO	5.54919	6	up	0.0039
pyridoxal phosphate binding	GO	5.53787	2	up	0.0039
binding, bridging	GO	5.51897	2	up	0.004
receptor signaling protein activity	GO	5.49456	2	up	0.0041
positive regulation of blood pressure	GO	5.41165	2	up	0.0045
negative regulation of protein serine/threonine kinase activity	GO	5.3709	3	up	0.0046
positive regulation of receptor activity	GO	5.35037	2	up	0.0047
circadian behavior	GO	5.35001	1	up	0.0047
detection of light stimulus	GO	5.31823	2	up	0.0049
oocyte maturation	GO	5.3144	1	up	0.0049
ligase activity, forming carbon-sulfur bonds	GO	5.31366	2	up	0.0049
lysosome	GO	5.27602	5	up	0.0051
hindbrain development	GO	5.27346	3	up	0.0051
rhythmic behavior	GO	5.27323	1	up	0.0051
negative regulation of cell adhesion	GO	5.24037	3	up	0.0053
meiosis	GO	5.18396	3	up	0.0056
oxidoreductase activity, acting on single donors with incorporation of molecular oxygen, incorporation of two atoms of oxygen	GO	5.14401	2	up	0.0058
oxidoreductase activity, acting on the aldehyde or oxo group of donors, NAD or NADP as acceptor	GO	5.14233	2	up	0.0058
meiotic cell cycle	GO	5.1384	3	up	0.0059
cellular response to starvation	GO	5.12069	2	up	0.006
oxidoreductase activity, acting on single donors with incorporation of molecular oxygen	GO	5.11931	2	up	0.006
cell fate determination	GO	5.09154	2	up	0.0061
positive regulation of ERBB signaling pathway	GO	5.07863	1	up	0.0062
chylomicron	GO	5.07307	1	up	0.0063
mesenchymal cell differentiation	GO	5.06391	3	up	0.0063
regulation of cell projection organization	GO	5.03619	5	up	0.0065
immunoglobulin production	GO	5.03008	2	up	0.0065
dioxygenase activity	GO	5.02366	2	up	0.0066
response to unfolded protein	GO	4.97865	1	up	0.0069
epidermis morphogenesis	GO	4.94851	2	up	0.0071
sarcolemma	GO	4.91057	3	up	0.0074
negative regulation of neuron death	GO	4.87424	3	up	0.0076
drug binding	GO	4.87212	3	up	0.0077
response to topologically incorrect protein	GO	4.86319	1	up	0.0077
cytoplasmic vesicle membrane	GO	4.85506	2	up	0.0078
cellular process involved in reproduction	GO	4.82592	5	up	0.008
embryonic appendage morphogenesis	GO	4.81425	3	up	0.0081
fibril	GO	4.80925	1	up	0.0082
negative regulation of blood pressure	GO	4.78634	2	up	0.0083
production of molecular mediator of immune response	GO	4.77691	2	up	0.0084
regulation of epidermis development	GO	4.76826	2	up	0.0085
embryonic cranial skeleton morphogenesis	GO	4.76657	2	up	0.0085
response to radiation	GO	4.74431	3	up	0.0087
cytoplasmic vesicle part	GO	4.732	2	up	0.0088
modified amino acid binding	GO	4.71574	2	up	0.009
oocyte development	GO	4.69227	1	up	0.0092
GTPase binding	GO	4.66196	2	up	0.0094
oocyte differentiation	GO	4.65733	1	up	0.0095
regulation of synapse organization	GO	4.65689	2	up	0.0095
basal plasma membrane	GO	4.65021	2	up	0.0096
embryo implantation	GO	4.6216	2	up	0.0098
behavioral defense response	GO	4.6149	1	up	0.0099
calcium-dependent protein binding	GO	4.5725	1	up	0.0103
vesicle membrane	GO	4.56773	2	up	0.0104
heart contraction	GO	4.54648	2	up	0.0106
neuropeptide receptor binding	GO	4.53194	1	up	0.0108
fear response	GO	4.49292	1	up	0.0112
regulation of cytokine biosynthetic process	GO	4.48259	2	up	0.0113
heme binding	GO	4.46543	3	up	0.0115
small GTPase regulator activity	GO	4.46073	4	up	0.0116
neuropeptide receptor activity	GO	4.45291	2	up	0.0116
membrane raft	GO	4.44602	4	up	0.0117
regulation of synapse structure and activity	GO	4.43949	2	up	0.0118
sensory perception of pain	GO	4.43235	2	up	0.0119
protein secretion	GO	4.41351	1	up	0.0121
positive regulation of reproductive process	GO	4.41338	2	up	0.0121
homophilic cell adhesion	GO	4.4132	2	up	0.0121
ligase activity	GO	4.40752	4	up	0.0122
circadian rhythm	GO	4.39796	2	up	0.0123
regulation of ERBB signaling pathway	GO	4.38844	1	up	0.0124
vacuolar membrane	GO	4.36306	2	up	0.0127
regulation of reactive oxygen species metabolic process	GO	4.3561	2	up	0.0128
B cell activation	GO	4.33899	2	up	0.013
tetrapyrrole binding	GO	4.33312	3	up	0.0131
embryonic digit morphogenesis	GO	4.32786	2	up	0.0132
cellular defense response	GO	4.30648	1	up	0.0135
germ cell development	GO	4.30274	3	up	0.0135
basal part of cell	GO	4.29992	2	up	0.0136
appendage morphogenesis	GO	4.28365	3	up	0.0138
limb morphogenesis	GO	4.28365	3	up	0.0138
activin binding	GO	4.25216	1	up	0.0142
regulation of I-kappaB kinase/NF-kappaB cascade	GO	4.24662	3	up	0.0143
fucosylation	GO	4.24257	1	up	0.0144
vacuolar part	GO	4.23889	2	up	0.0144
flavin adenine dinucleotide binding	GO	4.23038	2	up	0.0145
phenol-containing compound metabolic process	GO	4.20293	2	up	0.015
negative regulation of CD4-positive, alpha-beta T cell activation	GO	4.15827	1	up	0.0156
response to acid	GO	4.15198	3	up	0.0157
regulation of cyclase activity	GO	4.11592	1	up	0.0163
blastoderm segmentation	GO	4.10834	1	up	0.0164
tripartite regional subdivision	GO	4.10834	1	up	0.0164
ion channel activity	GO	4.08078	5	up	0.0169
sarcoplasm	GO	4.05014	2	up	0.0174
regulation of lyase activity	GO	4.04056	1	up	0.0176
regulation of organ growth	GO	4.01182	2	up	0.0181
subpallium development	GO	4.01089	1	up	0.0181
positive regulation of T cell migration	GO	3.9775	1	up	0.0187
cellular senescence	GO	3.96869	1	up	0.0189
male sex determination	GO	3.96582	1	up	0.019
positive regulation of neurogenesis	GO	3.95907	3	up	0.0191
organelle envelope lumen	GO	3.93928	2	up	0.0195
microtubule organizing center part	GO	3.93616	2	up	0.0195
MHC class I protein complex	GO	3.92025	1	up	0.0198
regulation of ion homeostasis	GO	3.87071	3	up	0.0208
regulation of membrane potential	GO	3.86806	4	up	0.0209
nitrogen cycle metabolic process	GO	3.86752	1	up	0.0209
detection of abiotic stimulus	GO	3.8597	2	up	0.0211
ubiquitin-protein ligase activity	GO	3.82035	2	up	0.0219
acylglycerol metabolic process	GO	3.81062	2	up	0.0221
carbohydrate biosynthetic process	GO	3.78838	2	up	0.0226
regulation of neural precursor cell proliferation	GO	3.78632	1	up	0.0227
arginine metabolic process	GO	3.77325	1	up	0.023
ureteric bud development	GO	3.76607	2	up	0.0231
regulation of developmental pigmentation	GO	3.76306	1	up	0.0232
positive regulation of lymphocyte migration	GO	3.75669	1	up	0.0234
neutral lipid metabolic process	GO	3.74842	2	up	0.0236
translation initiation factor binding	GO	3.72461	1	up	0.0241
development of primary male sexual characteristics	GO	3.71991	2	up	0.0242
amine biosynthetic process	GO	3.6696	1	up	0.0255
negative regulation of reactive oxygen species metabolic process	GO	3.63216	1	up	0.0265
neural tube closure	GO	3.63044	2	up	0.0265
male gamete generation	GO	3.61396	4	up	0.0269
male sex differentiation	GO	3.5701	2	up	0.0282
response to toxin	GO	3.55354	2	up	0.0286
neurotransmitter receptor activity	GO	3.53047	2	up	0.0293
regulation of calcium ion transmembrane transporter activity	GO	3.52858	1	up	0.0293
primary neural tube formation	GO	3.50488	2	up	0.0301
antigen processing and presentation of peptide antigen via MHC class I	GO	3.49478	1	up	0.0304
acid-amino acid ligase activity	GO	3.49387	2	up	0.0304
sex determination	GO	3.49204	1	up	0.0304
CD4-positive, alpha-beta T cell activation	GO	3.47288	1	up	0.031
calcium channel regulator activity	GO	3.47069	1	up	0.0311
mRNA splice site selection	GO	3.47027	1	up	0.0311
axon part	GO	3.43564	3	up	0.0322
positive regulation of CD4-positive, alpha-beta T cell activation	GO	3.42487	1	up	0.0326
divalent inorganic cation transport	GO	3.41635	2	up	0.0328
organic acid transmembrane transporter activity	GO	3.39312	2	up	0.0336
hair follicle morphogenesis	GO	3.37974	1	up	0.0341
retinol binding	GO	3.37758	1	up	0.0341
asymmetric protein localization	GO	3.36586	1	up	0.0345
renal system vasculature development	GO	3.35497	1	up	0.0349
kidney vasculature development	GO	3.35497	1	up	0.0349
carboxy-lyase activity	GO	3.35165	1	up	0.035
nucleus localization	GO	3.34723	1	up	0.0352
cellular amide metabolic process	GO	3.34419	1	up	0.0353
racemase and epimerase activity	GO	3.33718	1	up	0.0355
ATP metabolic process	GO	3.33148	3	up	0.0357
amino acid transport	GO	3.31639	2	up	0.0363
cell maturation	GO	3.30163	1	up	0.0368
axolemma	GO	3.2876	1	up	0.0373
ligase activity, forming carbon-nitrogen bonds	GO	3.28329	2	up	0.0375
MHC protein complex	GO	3.27542	1	up	0.0378
regulation of cation channel activity	GO	3.2706	1	up	0.038
calcium-dependent cell-cell adhesion	GO	3.26149	1	up	0.0383
membrane repolarization involved in regulation of action potential	GO	3.24185	1	up	0.0391
membrane repolarization involved in regulation of cardiac muscle cell action potential	GO	3.24185	1	up	0.0391
membrane repolarization	GO	3.24185	1	up	0.0391
regulation of heart rate by cardiac conduction	GO	3.24185	1	up	0.0391
regulation of cardiac muscle cell action potential involved in contraction	GO	3.24185	1	up	0.0391
flagellum	GO	3.1959	2	up	0.0409
intestinal absorption	GO	3.18852	1	up	0.0412
cohesin complex	GO	3.18578	1	up	0.0413
regulation of stem cell differentiation	GO	3.18034	1	up	0.0416
somatic diversification of immunoglobulins	GO	3.1782	1	up	0.0417
neural tube formation	GO	3.17678	2	up	0.0417
TCTN-B9D complex	GO	3.17231	1	up	0.0419
transaminase activity	GO	3.17217	1	up	0.0419
axon	GO	3.16987	4	up	0.042
mammary gland lobule development	GO	3.15794	1	up	0.0425
synapse organization	GO	3.15549	2	up	0.0426
cell communication involved in cardiac conduction	GO	3.14851	1	up	0.0429
transferase activity, transferring nitrogenous groups	GO	3.13222	1	up	0.0436
Ras GTPase activator activity	GO	3.1086	2	up	0.0447
regulation of CD4-positive, alpha-beta T cell activation	GO	3.10829	1	up	0.0447
regulation of cell proliferation involved in heart morphogenesis	GO	3.09788	1	up	0.0451
cerebellar cortex formation	GO	3.08397	1	up	0.0458
membrane depolarization involved in regulation of action potential	GO	3.06347	1	up	0.0467
membrane depolarization involved in regulation of cardiac muscle cell action potential	GO	3.06347	1	up	0.0467
macroautophagy	GO	3.04758	1	up	0.0475
somatic diversification of immune receptors via germline recombination within a single locus	GO	3.04315	1	up	0.0477
vitamin transporter activity	GO	3.03642	1	up	0.048
anion binding	GO	3.0295	1	up	0.0483
sensory perception of light stimulus	GO	3.01824	2	up	0.0489
cell aging	GO	3.01632	1	up	0.049
laminin binding	GO	3.01459	1	up	0.0491
regulation of bone remodeling	GO	2.99096	1	up	0.0502
voltage-gated sodium channel complex	GO	2.98539	1	up	0.0505
stem cell maintenance	GO	2.97499	2	up	0.051
contractile fiber part	GO	2.96357	2	up	0.0516
chemoattractant activity	GO	2.95829	1	up	0.0519
somatic diversification of immune receptors	GO	2.95309	1	up	0.0522
RNA export from nucleus	GO	2.95056	1	up	0.0523
positive regulation of hemostasis	GO	2.94923	1	up	0.0524
low-density lipoprotein particle binding	GO	2.94923	1	up	0.0524
membrane coat	GO	2.94505	1	up	0.0526
coated membrane	GO	2.94505	1	up	0.0526
carbohydrate transmembrane transporter activity	GO	2.92596	1	up	0.0536
excretion	GO	2.92248	1	up	0.0538
carbon-carbon lyase activity	GO	2.92191	1	up	0.0538
regulation of sodium ion transmembrane transporter activity	GO	2.91325	1	up	0.0543
regulation of cardiac muscle cell contraction	GO	2.91325	1	up	0.0543
ciliary transition zone	GO	2.91055	1	up	0.0544
signal sequence binding	GO	2.89646	1	up	0.0552
antigen processing and presentation of peptide antigen	GO	2.89246	1	up	0.0554
embryonic epithelial tube formation	GO	2.87122	2	up	0.0566
endocrine system development	GO	2.87122	2	up	0.0566
MHC protein binding	GO	2.86637	1	up	0.0569
stem cell development	GO	2.86309	2	up	0.0571
regulation of heart morphogenesis	GO	2.83663	1	up	0.0586
carbohydrate transporter activity	GO	2.83336	1	up	0.0588
vitamin transport	GO	2.83081	1	up	0.059
organic cyclic compound biosynthetic process	GO	2.82749	2	up	0.0592
sodium channel regulator activity	GO	2.78365	1	up	0.0618
tube formation	GO	2.76095	2	up	0.0632
C21-steroid hormone metabolic process	GO	2.71773	1	up	0.066
morphogenesis of a polarized epithelium	GO	2.70572	1	up	0.0668
cellular glucose homeostasis	GO	2.70398	1	up	0.0669
sodium ion transmembrane transport	GO	2.70266	2	up	0.067
acid-thiol ligase activity	GO	2.69535	1	up	0.0675
virus-host interaction	GO	2.69056	1	up	0.0678
cerebellar cortex morphogenesis	GO	2.69003	1	up	0.0679
endothelial cell development	GO	2.69003	1	up	0.0679
contractile fiber	GO	2.68763	2	up	0.068
lipid storage	GO	2.68558	1	up	0.0682
gas transport	GO	2.67179	1	up	0.0691
leukocyte mediated cytotoxicity	GO	2.65727	1	up	0.0701
axoneme part	GO	2.65727	1	up	0.0701
vitamin biosynthetic process	GO	2.62762	1	up	0.0723
regulation of cardiac muscle cell action potential	GO	2.61769	1	up	0.073
cardiac conduction	GO	2.61769	1	up	0.073
adult locomotory behavior	GO	2.60594	1	up	0.0738
maintenance of protein localization in organelle	GO	2.60106	1	up	0.0742
viral reproductive process	GO	2.58532	1	up	0.0754
coated pit	GO	2.57828	1	up	0.0759
regulation of cardiac muscle cell membrane potential	GO	2.56835	1	up	0.0767
cell projection membrane	GO	2.55598	2	up	0.0776
meiotic chromosome segregation	GO	2.55426	1	up	0.0778
lymphocyte proliferation	GO	2.54208	1	up	0.0787
mononuclear cell proliferation	GO	2.5238	1	up	0.0802
drug transporter activity	GO	2.52293	1	up	0.0802
oxidoreductase activity, acting on paired donors, with incorporation or reduction of molecular oxygen, NADH or NADPH as one donor, and incorporation of one atom of oxygen	GO	2.51473	1	up	0.0809
sister chromatid cohesion	GO	2.51342	1	up	0.081
core promoter proximal region sequence-specific DNA binding	GO	2.48316	1	up	0.0835
antigen processing and presentation	GO	2.47539	1	up	0.0841
isoprenoid biosynthetic process	GO	2.46027	1	up	0.0854
regulation of fatty acid transport	GO	2.45977	1	up	0.0855
apicolateral plasma membrane	GO	2.43834	2	up	0.0873
cerebellum morphogenesis	GO	2.41384	1	up	0.0895
core promoter proximal region DNA binding	GO	2.41233	1	up	0.0896
positive regulation of reactive oxygen species metabolic process	GO	2.40944	1	up	0.0899
cellular lipid catabolic process	GO	2.40023	1	up	0.0907
cell killing	GO	2.38149	1	up	0.0924
regulation of Notch signaling pathway	GO	2.36416	1	up	0.094
cerebellar cortex development	GO	2.35608	1	up	0.0948
mitochondrial large ribosomal subunit	GO	2.35484	1	up	0.0949
intrinsic to organelle membrane	GO	2.31217	2	up	0.099
intrinsic to Golgi membrane	GO	2.31013	1	up	0.0992
hindbrain morphogenesis	GO	2.30179	1	up	0.1001
viral reproduction	GO	2.29011	1	up	0.1013
membrane lipid biosynthetic process	GO	2.28484	1	up	0.1018
NADP binding	GO	2.27181	1	up	0.1031
endothelial cell differentiation	GO	2.25058	1	up	0.1053
mRNA transport	GO	2.22797	1	up	0.1077
cellular nitrogen compound biosynthetic process	GO	2.22346	2	up	0.1082
regulation of action potential	GO	2.20649	2	up	0.1101
adult behavior	GO	2.19627	1	up	0.1112
collagen binding	GO	2.19577	1	up	0.1113
centrosome	GO	2.19014	3	up	0.1119
protein localization to membrane	GO	2.17422	1	up	0.1137
peptidase activator activity	GO	2.1702	1	up	0.1142
spermatid development	GO	2.16227	1	up	0.1151
cardiac muscle contraction	GO	2.15157	1	up	0.1163
cell-cell signaling involved in cell fate commitment	GO	2.14583	1	up	0.117
genitalia development	GO	2.14529	1	up	0.117
photoreceptor cell development	GO	2.14006	1	up	0.1176
regulation of neurotransmitter secretion	GO	2.10405	1	up	0.122
xenobiotic metabolic process	GO	2.09819	1	up	0.1227
autophagy	GO	2.09339	1	up	0.1233
neurotransmitter secretion	GO	2.09149	1	up	0.1235
nucleic acid transport	GO	2.0907	1	up	0.1236
RNA transport	GO	2.0907	1	up	0.1236
establishment of RNA localization	GO	2.0907	1	up	0.1236
spermatid differentiation	GO	2.08629	1	up	0.1241
nerve development	GO	2.07524	1	up	0.1255
RNA localization	GO	2.03474	1	up	0.1307
cell fate specification	GO	2.0297	1	up	0.1314
response to xenobiotic stimulus	GO	2.01925	1	up	0.1328
transcription corepressor activity	GO	2.01675	1	up	0.1331
oxidoreductase activity, acting on NADH or NADPH	GO	2.00062	1	up	0.1353
brush border	GO	1.98663	1	up	0.1372
transferase activity, transferring pentosyl groups	GO	1.97117	1	up	0.1393
neuromuscular junction	GO	1.9572	1	up	0.1413
photoreceptor cell differentiation	GO	1.9419	1	up	0.1434
calmodulin binding	GO	1.91677	1	up	0.1471
regulation of transforming growth factor beta receptor signaling pathway	GO	1.91668	1	up	0.1471
lipid particle	GO	1.91578	1	up	0.1472
voltage-gated potassium channel complex	GO	1.88331	1	up	0.1521
axoneme	GO	1.87943	1	up	0.1527
mitochondrial intermembrane space	GO	1.87709	1	up	0.153
nucleobase-containing compound transport	GO	1.86771	1	up	0.1545
cerebellum development	GO	1.85617	1	up	0.1563
digestive tract morphogenesis	GO	1.84878	1	up	0.1574
establishment of cell polarity	GO	1.80998	1	up	0.1637
ribonucleoprotein complex assembly	GO	1.73073	1	up	0.1772
metencephalon development	GO	1.69803	1	up	0.183
ribonucleoprotein complex subunit organization	GO	1.68314	1	up	0.1858
diencephalon development	GO	1.68031	1	up	0.1863
response to mechanical stimulus	GO	1.65559	1	up	0.191
organelle localization	GO	1.63552	1	up	0.1949
oxidoreductase activity, acting on a sulfur group of donors	GO	1.62794	1	up	0.1963
organellar ribosome	GO	1.61737	1	up	0.1984
mitochondrial ribosome	GO	1.61737	1	up	0.1984
hydrolase activity, hydrolyzing O-glycosyl compounds	GO	1.60096	1	up	0.2017
caveola	GO	1.60049	1	up	0.2018
regulation of neurotransmitter levels	GO	1.58807	1	up	0.2043
response to virus	GO	1.57508	1	up	0.207
fat cell differentiation	GO	1.48902	1	up	0.2256
intrinsic to endoplasmic reticulum membrane	GO	1.48822	1	up	0.2258
dendrite development	GO	1.48638	1	up	0.2262
exocytosis	GO	1.47634	1	up	0.2285
neurotransmitter transport	GO	1.47152	1	up	0.2296
establishment or maintenance of cell polarity	GO	1.47152	1	up	0.2296
nuclear transport	GO	1.43419	1	up	0.2383
mRNA binding	GO	1.41161	1	up	0.2438
hydrolase activity, acting on glycosyl bonds	GO	1.39111	1	up	0.2488
myelination	GO	1.35098	1	up	0.259
ensheathment of neurons	GO	1.32983	1	up	0.2645
axon ensheathment	GO	1.32983	1	up	0.2645
large ribosomal subunit	GO	1.29258	1	up	0.2746
endosome membrane	GO	1.28096	1	up	0.2778
endosomal part	GO	1.28096	1	up	0.2778
nuclear outer membrane-endoplasmic reticulum membrane network	GO	1.2804	2	up	0.2779
carbohydrate catabolic process	GO	1.2711	1	up	0.2805
kinetochore	GO	1.24884	1	up	0.2868
regulation of exocytosis	GO	1.1783	1	up	0.3078
ruffle	GO	1.13258	1	up	0.3222
lipid modification	GO	1.1086	1	up	0.33
chromosome segregation	GO	1.03884	1	up	0.3539
Golgi membrane	GO	1.03083	1	up	0.3567
phosphatidylinositol binding	GO	0.926576	1	up	0.3959
ribonucleoprotein complex biogenesis	GO	0.87297	1	up	0.4177
cellular component biogenesis at cellular level	GO	0.826962	1	up	0.4374
ribosomal subunit	GO	0.813322	1	up	0.4434
mitochondrial matrix	GO	0.766298	1	up	0.4647
Golgi apparatus part	GO	0.753006	1	up	0.4709
endoplasmic reticulum membrane	GO	0.696626	1	up	0.4983
endoplasmic reticulum part	GO	0.588584	1	up	0.5551
generation of precursor metabolites and energy	GO	0.403025	1	up	0.6683

## Sheet: DOWN pathways
Bioset vs Biogroups record downloaded from Correlation Engine(2019/12/10 21:16:56)
Bioset: BPN_C.vs.BPN_TX_CorrEng
Study: 14489R
https://hci.ussc.informatics.illumina.com/c/search/bg/?type=bioset&id=1207753#bgcf=true&dcf=-1&gcmax=500&gcmin=10&taxf=ontologies
Biogroup name	source	Score	common genes	direction	p-value
regulation of locomotion	GO	34.4901	19	down	1e-15
regulation of cellular component movement	GO	34.1225	19	down	1.5e-15
regulation of cell migration	GO	33.7456	18	down	2.2e-15
regulation of cell motility	GO	33.0983	18	down	4.2e-15
response to wounding	GO	28.4249	17	down	4.5e-13
connective tissue development	GO	25.8155	11	down	6.1e-12
angiogenesis	GO	24.6295	12	down	2e-11
blood vessel morphogenesis	GO	23.277	13	down	7.8e-11
immune response	GO	22.9121	14	down	1.1e-10
skeletal system development	GO	22.611	13	down	1.5e-10
chemotaxis	GO	22.0596	12	down	2.6e-10
ossification	GO	22.0261	10	down	2.7e-10
taxis	GO	22.022	12	down	2.7e-10
positive regulation of immune system process	GO	21.6766	13	down	3.9e-10
cartilage development	GO	21.1999	9	down	6.2e-10
positive regulation of locomotion	GO	20.8923	11	down	8.4e-10
glycosaminoglycan binding	GO	19.1657	8	down	4.7e-09
cell migration	GO	18.6578	12	down	7.9e-09
positive regulation of cell motility	GO	18.5984	10	down	8.4e-09
carbohydrate derivative binding	GO	18.3749	8	down	1e-08
positive regulation of cellular component movement	GO	18.3182	10	down	1.1e-08
negative regulation of locomotion	GO	17.3151	8	down	3e-08
regulation of epithelial cell proliferation	GO	17.1389	9	down	3.6e-08
fatty acid biosynthetic process	GO	16.8358	7	down	4.9e-08
immune effector process	GO	16.6274	8	down	6e-08
activation of immune response	GO	16.5783	7	down	6.3e-08
fatty acid metabolic process	GO	16.4391	9	down	7.3e-08
sulfur compound metabolic process	GO	16.282	7	down	8.5e-08
positive regulation of immune response	GO	16.1536	8	down	9.7e-08
regulation of response to external stimulus	GO	15.5336	10	down	1.8e-07
endocytosis	GO	15.3656	9	down	2.1e-07
negative regulation of cell motility	GO	15.1982	7	down	2.5e-07
complement activation, classical pathway	GO	15.1099	4	down	2.7e-07
negative regulation of cellular component movement	GO	14.9374	7	down	3.3e-07
macrophage activation	GO	14.8456	4	down	3.6e-07
receptor complex	GO	14.7344	7	down	4e-07
tube morphogenesis	GO	14.2099	9	down	6.7e-07
extracellular matrix organization	GO	14.1549	7	down	7.1e-07
extracellular structure organization	GO	14.1093	7	down	7.5e-07
complement activation	GO	14.0989	4	down	7.5e-07
humoral immune response mediated by circulating immunoglobulin	GO	13.9891	4	down	8.4e-07
regulation of protein transport	GO	13.8757	8	down	9.4e-07
positive regulation of secretion	GO	13.8749	8	down	9.4e-07
epidermis development	GO	13.7997	8	down	1e-06
protein activation cascade	GO	13.7784	4	down	1e-06
regulation of behavior	GO	13.773	5	down	1e-06
positive regulation of programmed cell death	GO	13.4808	10	down	1.4e-06
regulation of body fluid levels	GO	13.4448	7	down	1.4e-06
extrinsic to membrane	GO	13.0868	6	down	2.1e-06
wound healing	GO	12.9806	7	down	2.3e-06
organic acid biosynthetic process	GO	12.8742	7	down	2.6e-06
guanyl nucleotide binding	GO	12.8357	9	down	2.7e-06
innate immune response	GO	12.8219	7	down	2.7e-06
regulation of cell adhesion	GO	12.7828	8	down	2.8e-06
inflammatory response	GO	12.6684	8	down	3.1e-06
regulation of lipid metabolic process	GO	12.6676	7	down	3.2e-06
enzyme inhibitor activity	GO	12.5845	7	down	3.4e-06
inner ear development	GO	12.5811	6	down	3.4e-06
regulation of proteolysis	GO	12.539	6	down	3.6e-06
peptidase inhibitor activity	GO	12.1796	6	down	5.1e-06
protein heterodimerization activity	GO	12.157	9	down	5.3e-06
growth factor activity	GO	12.0162	6	down	6e-06
regulation of multicellular organism growth	GO	12.0022	5	down	6.1e-06
G-protein coupled receptor binding	GO	11.9436	7	down	6.5e-06
regulation of cysteine-type endopeptidase activity	GO	11.9287	6	down	6.6e-06
cell activation	GO	11.9024	9	down	6.8e-06
microtubule	GO	11.5855	8	down	9.3e-06
humoral immune response	GO	11.5161	4	down	1e-05
regulation of chemotaxis	GO	11.5064	4	down	1e-05
regulation of protein localization to nucleus	GO	11.5031	5	down	1e-05
branching morphogenesis of a tube	GO	11.4207	6	down	1.1e-05
regulation of intracellular transport	GO	11.3648	6	down	1.2e-05
regulation of ossification	GO	11.2814	6	down	1.3e-05
regulation of peptidyl-tyrosine phosphorylation	GO	11.194	6	down	1.4e-05
hormone activity	GO	11.1922	4	down	1.4e-05
peptide secretion	GO	11.0714	3	down	1.6e-05
cellular response to fibroblast growth factor stimulus	GO	11.0145	4	down	1.6e-05
response to fibroblast growth factor stimulus	GO	11.0145	4	down	1.6e-05
digestion	GO	11.0126	3	down	1.6e-05
protein-lipid complex subunit organization	GO	10.9758	3	down	1.7e-05
plasma lipoprotein particle organization	GO	10.9758	3	down	1.7e-05
cellular divalent inorganic cation homeostasis	GO	10.7843	5	down	2.1e-05
growth factor binding	GO	10.735	5	down	2.2e-05
enzyme activator activity	GO	10.726	7	down	2.2e-05
regulation of nucleocytoplasmic transport	GO	10.67	5	down	2.3e-05
lymphocyte mediated immunity	GO	10.5642	4	down	2.6e-05
divalent inorganic cation homeostasis	GO	10.554	5	down	2.6e-05
myeloid leukocyte activation	GO	10.4783	4	down	2.8e-05
molting cycle process	GO	10.4696	5	down	2.8e-05
hair cycle process	GO	10.4696	5	down	2.8e-05
skeletal muscle cell differentiation	GO	10.4619	3	down	2.9e-05
regulation of blood vessel size	GO	10.4267	3	down	3e-05
negative regulation of secretion	GO	10.3981	5	down	3e-05
hormone secretion	GO	10.3865	3	down	3.1e-05
regulation of tube size	GO	10.3785	3	down	3.1e-05
morphogenesis of a branching structure	GO	10.3399	6	down	3.2e-05
molting cycle	GO	10.301	5	down	3.4e-05
hair cycle	GO	10.301	5	down	3.4e-05
peptide transport	GO	10.2489	3	down	3.5e-05
mesoderm formation	GO	10.2222	4	down	3.6e-05
heart morphogenesis	GO	10.1547	6	down	3.9e-05
adaptive immune response based on somatic recombination of immune receptors built from immunoglobulin superfamily domains	GO	9.95294	4	down	4.8e-05
mesoderm morphogenesis	GO	9.94908	4	down	4.8e-05
cell activation involved in immune response	GO	9.87941	4	down	5.1e-05
leukocyte activation involved in immune response	GO	9.87941	4	down	5.1e-05
regulation of protein serine/threonine kinase activity	GO	9.8506	7	down	5.3e-05
regulation of plasma lipoprotein particle levels	GO	9.81888	3	down	5.4e-05
phospholipid transport	GO	9.81888	3	down	5.4e-05
hemopoiesis	GO	9.81548	8	down	5.5e-05
protein complex binding	GO	9.76218	8	down	5.8e-05
multicellular organismal homeostasis	GO	9.69012	5	down	6.2e-05
muscle cell differentiation	GO	9.67326	6	down	6.3e-05
adaptive immune response	GO	9.66387	4	down	6.4e-05
leukocyte mediated immunity	GO	9.66387	4	down	6.4e-05
osteoblast differentiation	GO	9.5731	4	down	7e-05
vasoconstriction	GO	9.56785	2	down	7e-05
response to hormone stimulus	GO	9.55635	8	down	7.1e-05
response to pH	GO	9.54524	3	down	7.2e-05
gland development	GO	9.42066	6	down	8.1e-05
negative regulation of cellular component organization	GO	9.31911	6	down	9e-05
sterol transport	GO	9.26757	3	down	9.4e-05
regulation of purine nucleotide biosynthetic process	GO	9.24676	4	down	9.6e-05
peptide binding	GO	9.20804	5	down	0.0001
extrinsic to plasma membrane	GO	9.14486	4	down	0.0001
growth	GO	9.11508	7	down	0.0001
secretion by cell	GO	9.09314	5	down	0.0001
leukocyte differentiation	GO	9.08273	6	down	0.0001
hemopoietic or lymphoid organ development	GO	9.06997	8	down	0.0001
positive regulation of cysteine-type endopeptidase activity	GO	9.02596	4	down	0.0001
body fluid secretion	GO	8.9827	3	down	0.0001
formation of primary germ layer	GO	8.97192	4	down	0.0001
leukocyte activation	GO	8.92997	7	down	0.0001
regulation of hormone secretion	GO	8.91965	5	down	0.0001
regulation of purine nucleotide metabolic process	GO	8.9001	7	down	0.0001
regulation of systemic arterial blood pressure by hormone	GO	8.89767	2	down	0.0001
negative regulation of protein metabolic process	GO	8.87132	5	down	0.0001
response to metal ion	GO	8.83087	4	down	0.0001
lipid transporter activity	GO	8.80512	3	down	0.0001
response to inorganic substance	GO	8.79228	6	down	0.0002
regulation of carbohydrate metabolic process	GO	8.771	4	down	0.0002
heterotrimeric G-protein complex	GO	8.75574	3	down	0.0002
immune system development	GO	8.70832	8	down	0.0002
oxidoreductase activity, acting on the CH-OH group of donors, NAD or NADP as acceptor	GO	8.65984	2	down	0.0002
response to alcohol	GO	8.59175	3	down	0.0002
smooth muscle contraction	GO	8.5509	2	down	0.0002
lipid biosynthetic process	GO	8.54263	7	down	0.0002
regulation of smooth muscle cell proliferation	GO	8.53925	3	down	0.0002
generation of a signal involved in cell-cell signaling	GO	8.51534	3	down	0.0002
oxidoreductase activity, acting on CH-OH group of donors	GO	8.49522	2	down	0.0002
platelet activation	GO	8.45997	3	down	0.0002
endocrine process	GO	8.44763	2	down	0.0002
ear morphogenesis	GO	8.44763	4	down	0.0002
pallium development	GO	8.41249	4	down	0.0002
gland morphogenesis	GO	8.37348	4	down	0.0002
blood coagulation	GO	8.36959	4	down	0.0002
coagulation	GO	8.36959	4	down	0.0002
tissue homeostasis	GO	8.35284	4	down	0.0002
nucleoside metabolic process	GO	8.34146	6	down	0.0002
mesoderm development	GO	8.32719	4	down	0.0002
hemostasis	GO	8.32719	4	down	0.0002
cargo receptor activity	GO	8.32541	3	down	0.0002
cell morphogenesis involved in neuron differentiation	GO	8.31267	5	down	0.0002
integrin binding	GO	8.31008	3	down	0.0002
positive regulation of cell cycle	GO	8.3044	4	down	0.0002
tissue remodeling	GO	8.26762	4	down	0.0003
single-organism behavior	GO	8.24333	7	down	0.0003
cellular response to vascular endothelial growth factor stimulus	GO	8.23538	2	down	0.0003
guanosine-containing compound catabolic process	GO	8.23448	5	down	0.0003
cellular response to nutrient levels	GO	8.12249	4	down	0.0003
protein phosphatase regulator activity	GO	8.10274	2	down	0.0003
regulation of vasoconstriction	GO	7.99957	2	down	0.0003
response to heat	GO	7.97998	3	down	0.0003
cell morphogenesis involved in differentiation	GO	7.94415	7	down	0.0004
positive regulation of protein serine/threonine kinase activity	GO	7.93695	5	down	0.0004
regulation of protein secretion	GO	7.91978	4	down	0.0004
anion transport	GO	7.82128	4	down	0.0004
response to peptide hormone stimulus	GO	7.79454	4	down	0.0004
sulfur compound biosynthetic process	GO	7.77995	3	down	0.0004
hormone binding	GO	7.76099	3	down	0.0004
guanosine-containing compound metabolic process	GO	7.75951	5	down	0.0004
phosphatase regulator activity	GO	7.74484	2	down	0.0004
extrinsic to internal side of plasma membrane	GO	7.72584	3	down	0.0004
regulation of ion transport	GO	7.67966	5	down	0.0005
response to steroid hormone stimulus	GO	7.60001	5	down	0.0005
monosaccharide transport	GO	7.53749	2	down	0.0005
determination of heart left/right asymmetry	GO	7.53619	3	down	0.0005
UDP-glycosyltransferase activity	GO	7.4933	4	down	0.0006
regulation of myeloid cell differentiation	GO	7.44498	4	down	0.0006
muscle organ development	GO	7.3507	5	down	0.0006
cellular response to extracellular stimulus	GO	7.34138	4	down	0.0006
leukocyte migration	GO	7.27222	3	down	0.0007
response to starvation	GO	7.27098	3	down	0.0007
gastrulation	GO	7.24732	4	down	0.0007
neuron projection development	GO	7.21521	6	down	0.0007
oxidoreductase activity, acting on a heme group of donors, oxygen as acceptor	GO	7.1807	1	down	0.0008
heme-copper terminal oxidase activity	GO	7.1807	1	down	0.0008
cytochrome-c oxidase activity	GO	7.1807	1	down	0.0008
insulin-like growth factor binding	GO	7.18012	2	down	0.0008
membrane invagination	GO	7.17492	2	down	0.0008
oxidoreductase activity, acting on a heme group of donors	GO	7.13626	1	down	0.0008
reactive oxygen species metabolic process	GO	7.09938	3	down	0.0008
regulation of cell size	GO	7.08694	2	down	0.0008
phospholipid transporter activity	GO	7.04152	2	down	0.0009
regulation of organ morphogenesis	GO	7.03991	4	down	0.0009
purine-containing compound catabolic process	GO	7.03599	7	down	0.0009
forebrain development	GO	6.98672	5	down	0.0009
peptide hormone secretion	GO	6.96949	2	down	0.0009
cell part morphogenesis	GO	6.96283	5	down	0.0009
water homeostasis	GO	6.95578	2	down	0.001
regulation of mitotic cell cycle	GO	6.94499	4	down	0.001
cell surface receptor signaling pathway involved in heart development	GO	6.89172	2	down	0.001
regulation of Wnt receptor signaling pathway	GO	6.88847	4	down	0.001
regulation of JAK-STAT cascade	GO	6.88286	3	down	0.001
regulation of cell morphogenesis	GO	6.88063	5	down	0.001
sterol metabolic process	GO	6.85799	3	down	0.0011
exocrine system development	GO	6.85496	2	down	0.0011
regulation of muscle contraction	GO	6.80643	3	down	0.0011
embryonic skeletal joint development	GO	6.77367	2	down	0.0011
response to temperature stimulus	GO	6.75822	3	down	0.0012
olefin biosynthetic process	GO	6.75191	2	down	0.0012
peptide biosynthetic process	GO	6.75191	2	down	0.0012
regulation of neuron death	GO	6.71189	4	down	0.0012
fatty acid binding	GO	6.70526	2	down	0.0012
odontogenesis	GO	6.63444	3	down	0.0013
embryonic heart tube development	GO	6.63412	3	down	0.0013
lipoprotein biosynthetic process	GO	6.62651	2	down	0.0013
ligand-activated sequence-specific DNA binding RNA polymerase II transcription factor activity	GO	6.60512	2	down	0.0014
cell-cell adhesion	GO	6.56668	5	down	0.0014
neuronal cell body	GO	6.56003	6	down	0.0014
blood circulation	GO	6.55836	4	down	0.0014
peptide receptor activity	GO	6.55737	3	down	0.0014
regulation of cell growth	GO	6.51692	5	down	0.0015
regulation of heart contraction	GO	6.48617	2	down	0.0015
telencephalon development	GO	6.47648	4	down	0.0015
myeloid cell differentiation	GO	6.40356	4	down	0.0017
endopeptidase inhibitor activity	GO	6.36052	4	down	0.0017
mating	GO	6.34778	2	down	0.0018
regulation of mononuclear cell proliferation	GO	6.34646	4	down	0.0018
RNA polymerase II core promoter proximal region sequence-specific DNA binding transcription factor activity involved in positive regulation of transcription	GO	6.30001	3	down	0.0018
mitochondrial respiratory chain	GO	6.28304	1	down	0.0019
glial cell differentiation	GO	6.27408	3	down	0.0019
immune response-activating signal transduction	GO	6.2671	3	down	0.0019
cellular response to hormone stimulus	GO	6.26632	4	down	0.0019
regulation of protein catabolic process	GO	6.2244	4	down	0.002
RNA polymerase II transcription regulatory region sequence-specific DNA binding transcription factor activity involved in positive regulation of transcription	GO	6.22261	3	down	0.002
regulation of mesoderm development	GO	6.17807	1	down	0.0021
carbohydrate transport	GO	6.15641	2	down	0.0021
cellular alkene metabolic process	GO	6.14974	2	down	0.0021
aorta development	GO	6.13467	2	down	0.0022
aorta morphogenesis	GO	6.13467	2	down	0.0022
heart trabecula morphogenesis	GO	6.13467	2	down	0.0022
response to cAMP	GO	6.11793	2	down	0.0022
transferase activity, transferring hexosyl groups	GO	6.09624	4	down	0.0023
olefin metabolic process	GO	6.07728	2	down	0.0023
phospholipid binding	GO	6.06193	6	down	0.0023
regulation of cardiac muscle cell differentiation	GO	6.02408	1	down	0.0024
immune response-regulating signaling pathway	GO	5.97863	3	down	0.0025
regulation of translation	GO	5.89309	4	down	0.0028
negative regulation of hemostasis	GO	5.89242	2	down	0.0028
determination of bilateral symmetry	GO	5.85573	3	down	0.0029
regulation of blood pressure	GO	5.83528	2	down	0.0029
specification of symmetry	GO	5.82224	3	down	0.003
phosphatase binding	GO	5.78963	3	down	0.0031
positive regulation of cell growth	GO	5.77869	3	down	0.0031
response to light stimulus	GO	5.75755	4	down	0.0032
digestive tract development	GO	5.75651	3	down	0.0032
regulation of cell fate specification	GO	5.71909	1	down	0.0033
response to organic cyclic compound	GO	5.70276	3	down	0.0033
purinergic nucleotide receptor signaling pathway	GO	5.68925	2	down	0.0034
positive regulation of chromosome organization	GO	5.67535	2	down	0.0034
peptide hormone binding	GO	5.65819	2	down	0.0035
nucleolus	GO	5.64851	5	down	0.0035
axon guidance	GO	5.63995	3	down	0.0036
hair follicle maturation	GO	5.59837	2	down	0.0037
neuroblast proliferation	GO	5.57272	1	down	0.0038
neuron migration	GO	5.56102	3	down	0.0038
lipopolysaccharide binding	GO	5.49424	1	down	0.0041
mitochondrial membrane part	GO	5.45235	1	down	0.0043
developmental maturation	GO	5.45188	4	down	0.0043
negative regulation of cysteine-type endopeptidase activity	GO	5.44108	2	down	0.0043
purinergic receptor activity	GO	5.42564	2	down	0.0044
RNA polymerase II core promoter proximal region sequence-specific DNA binding transcription factor activity	GO	5.40932	3	down	0.0045
modification of morphology or physiology of other organism	GO	5.36894	2	down	0.0047
stem cell division	GO	5.36831	1	down	0.0047
regulation of multicellular organismal metabolic process	GO	5.3309	2	down	0.0048
blood vessel remodeling	GO	5.32753	2	down	0.0049
purinergic receptor signaling pathway	GO	5.30653	2	down	0.005
regulation of protein activation cascade	GO	5.30394	1	down	0.005
regulation of complement activation	GO	5.30394	1	down	0.005
glutathione metabolic process	GO	5.27721	2	down	0.0051
embryonic digestive tract development	GO	5.26855	2	down	0.0052
response to ethanol	GO	5.25653	2	down	0.0052
myofibril assembly	GO	5.23857	2	down	0.0053
trabecula morphogenesis	GO	5.23857	2	down	0.0053
postsynaptic density	GO	5.23251	3	down	0.0053
dendritic spine head	GO	5.23251	3	down	0.0053
intramolecular oxidoreductase activity	GO	5.22048	2	down	0.0054
monooxygenase activity	GO	5.19633	3	down	0.0055
activation of innate immune response	GO	5.15414	2	down	0.0058
positive regulation of renal sodium excretion	GO	5.13542	1	down	0.0059
leukocyte chemotaxis	GO	5.08795	2	down	0.0062
actin filament bundle	GO	5.06453	2	down	0.0063
protein self-association	GO	5.05668	2	down	0.0064
alcohol metabolic process	GO	5.038	3	down	0.0065
positive regulation of neuron death	GO	5.00572	2	down	0.0067
maintenance of location in cell	GO	4.8951	2	down	0.0075
steroid metabolic process	GO	4.84822	3	down	0.0078
negative regulation of chromosome organization	GO	4.84574	1	down	0.0079
learning or memory	GO	4.84068	3	down	0.0079
regulation of cerebellar granule cell precursor proliferation	GO	4.83699	1	down	0.0079
regulation of extent of cell growth	GO	4.79458	1	down	0.0083
pyridine-containing compound metabolic process	GO	4.78217	1	down	0.0084
nuclease activity	GO	4.77211	2	down	0.0085
peripheral nervous system development	GO	4.74527	2	down	0.0087
embryonic pattern specification	GO	4.73419	2	down	0.0088
multicellular organismal reproductive behavior	GO	4.70546	1	down	0.009
regulation of binding	GO	4.69686	2	down	0.0091
neural precursor cell proliferation	GO	4.69588	1	down	0.0091
response to drug	GO	4.6661	3	down	0.0094
response to bacterium	GO	4.64171	4	down	0.0096
pattern binding	GO	4.62359	1	down	0.0098
polysaccharide binding	GO	4.62359	1	down	0.0098
mating behavior	GO	4.6149	1	down	0.0099
negative regulation of purine nucleotide biosynthetic process	GO	4.53992	1	down	0.0107
immune response-activating cell surface receptor signaling pathway	GO	4.53901	2	down	0.0107
cytokine binding	GO	4.53702	2	down	0.0107
endosome	GO	4.50687	4	down	0.011
regulation of small GTPase mediated signal transduction	GO	4.50542	4	down	0.011
maintenance of location	GO	4.47184	2	down	0.0114
regulation of hemostasis	GO	4.46128	2	down	0.0115
negative regulation of purine nucleotide metabolic process	GO	4.44513	1	down	0.0117
nuclear matrix	GO	4.44208	1	down	0.0118
mitochondrial inner membrane	GO	4.43389	1	down	0.0119
appendage development	GO	4.39459	3	down	0.0123
spinal cord development	GO	4.39098	1	down	0.0124
palate development	GO	4.39098	1	down	0.0124
protein phosphatase inhibitor activity	GO	4.38435	1	down	0.0125
mitochondrial transport	GO	4.38166	2	down	0.0125
lipid catabolic process	GO	4.36469	3	down	0.0127
RNA polymerase II transcription factor binding	GO	4.35847	1	down	0.0128
transcription factor binding	GO	4.33763	5	down	0.0131
leukocyte homeostasis	GO	4.30725	2	down	0.0135
phosphatase inhibitor activity	GO	4.28653	1	down	0.0138
dendritic spine	GO	4.28155	3	down	0.0138
cardiac cell differentiation	GO	4.26171	2	down	0.0141
regulation of coagulation	GO	4.25303	2	down	0.0142
activation of cysteine-type endopeptidase activity	GO	4.24076	2	down	0.0144
negative regulation of reproductive process	GO	4.23836	2	down	0.0144
G-protein coupled peptide receptor activity	GO	4.21462	2	down	0.0148
superoxide metabolic process	GO	4.20552	1	down	0.0149
tissue regeneration	GO	4.19863	1	down	0.015
female gamete generation	GO	4.17928	2	down	0.0153
drug metabolic process	GO	4.17288	1	down	0.0154
electron carrier activity	GO	4.16758	2	down	0.0155
cell-type specific apoptotic process	GO	4.14766	2	down	0.0158
mitochondrial membrane	GO	4.14648	2	down	0.0158
cytokine secretion	GO	4.12638	1	down	0.0161
regulation of apoptotic signaling pathway	GO	4.11023	2	down	0.0164
positive regulation of leukocyte apoptotic process	GO	4.08903	1	down	0.0168
protein transporter activity	GO	4.07543	2	down	0.017
regulation of axonogenesis	GO	4.07463	2	down	0.017
protein serine/threonine phosphatase complex	GO	4.07302	1	down	0.017
establishment of protein localization to mitochondrion	GO	4.07302	1	down	0.017
regulation of sensory perception of pain	GO	4.04251	1	down	0.0176
regulation of response to DNA damage stimulus	GO	4.03632	2	down	0.0177
lymphocyte differentiation	GO	4.03392	3	down	0.0177
visual behavior	GO	3.99334	1	down	0.0184
oxidoreductase activity, acting on paired donors, with incorporation or reduction of molecular oxygen, reduced flavin or flavoprotein as one donor, and incorporation of one atom of oxygen	GO	3.97781	1	down	0.0187
reflex	GO	3.97228	1	down	0.0188
cell-cell junction organization	GO	3.96528	2	down	0.019
guanylate cyclase activity	GO	3.96115	1	down	0.019
T cell activation	GO	3.92583	3	down	0.0197
glycerolipid metabolic process	GO	3.9146	3	down	0.0199
multicellular organism growth	GO	3.9069	2	down	0.0201
detection of external stimulus	GO	3.88984	2	down	0.0204
regulation of striated muscle tissue development	GO	3.87567	2	down	0.0207
insemination	GO	3.84526	1	down	0.0214
grooming behavior	GO	3.84526	1	down	0.0214
temperature homeostasis	GO	3.8082	1	down	0.0222
lipoprotein particle binding	GO	3.79005	1	down	0.0226
protein-lipid complex binding	GO	3.79005	1	down	0.0226
neural tube development	GO	3.75997	1	down	0.0233
negative regulation of cell growth	GO	3.75272	2	down	0.0235
beta-amyloid binding	GO	3.7497	1	down	0.0235
tubulin binding	GO	3.71973	2	down	0.0242
cell-matrix adhesion	GO	3.71937	2	down	0.0242
symbiosis, encompassing mutualism through parasitism	GO	3.71781	2	down	0.0243
interspecies interaction between organisms	GO	3.71781	2	down	0.0243
multi-organism behavior	GO	3.71439	1	down	0.0244
insulin receptor binding	GO	3.71374	1	down	0.0244
oxidoreductase activity, acting on the CH-NH2 group of donors, oxygen as acceptor	GO	3.7038	1	down	0.0246
single-organism reproductive behavior	GO	3.68032	1	down	0.0252
vasodilation	GO	3.67367	1	down	0.0254
negative regulation of growth	GO	3.65692	3	down	0.0258
amine transmembrane transporter activity	GO	3.62453	1	down	0.0267
positive regulation of neural precursor cell proliferation	GO	3.62253	1	down	0.0267
response to other organism	GO	3.61976	5	down	0.0268
monosaccharide metabolic process	GO	3.61536	2	down	0.0269
carbon-sulfur lyase activity	GO	3.59574	1	down	0.0274
SH3 domain binding	GO	3.58803	2	down	0.0277
copulation	GO	3.58028	1	down	0.0279
neural crest cell development	GO	3.5739	1	down	0.028
memory	GO	3.57311	2	down	0.0281
positive regulation of peptidyl-lysine acetylation	GO	3.55978	1	down	0.0284
regulation of odontogenesis of dentin-containing tooth	GO	3.54529	1	down	0.0289
cellular response to drug	GO	3.53788	1	down	0.0291
cellular component maintenance at cellular level	GO	3.53669	1	down	0.0291
phagocytosis, recognition	GO	3.53302	1	down	0.0292
regulation of development, heterochronic	GO	3.53045	1	down	0.0293
eating behavior	GO	3.52418	1	down	0.0295
oxidoreductase activity, acting on the CH-NH2 group of donors	GO	3.52394	1	down	0.0295
spindle	GO	3.5136	2	down	0.0298
nitric oxide metabolic process	GO	3.5011	1	down	0.0302
salivary gland morphogenesis	GO	3.479	1	down	0.0308
multi-multicellular organism process	GO	3.47069	1	down	0.0311
kinase regulator activity	GO	3.45797	2	down	0.0315
transcription coactivator activity	GO	3.44548	1	down	0.0319
myosin complex	GO	3.39015	1	down	0.0337
reproductive behavior	GO	3.38017	1	down	0.034
cell fate commitment	GO	3.37928	2	down	0.0341
syntaxin binding	GO	3.34744	1	down	0.0352
kinase activator activity	GO	3.34649	1	down	0.0352
photoreceptor inner segment	GO	3.34212	1	down	0.0354
cilium	GO	3.28163	3	down	0.0376
actin polymerization or depolymerization	GO	3.27211	1	down	0.0379
positive regulation of intrinsic apoptotic signaling pathway	GO	3.26403	1	down	0.0382
aging	GO	3.25522	2	down	0.0386
cell growth	GO	3.24555	1	down	0.0389
sequence-specific DNA binding RNA polymerase II transcription factor activity	GO	3.24086	3	down	0.0391
establishment of protein localization to organelle	GO	3.22777	1	down	0.0396
learning	GO	3.21712	2	down	0.0401
striated muscle cell development	GO	3.21712	2	down	0.0401
SNARE binding	GO	3.20258	1	down	0.0407
defense response to bacterium	GO	3.19459	2	down	0.041
peroxisome	GO	3.19153	2	down	0.0411
microbody	GO	3.19153	2	down	0.0411
protein N-terminus binding	GO	3.18921	2	down	0.0412
vacuole organization	GO	3.18356	1	down	0.0414
protein import	GO	3.18231	2	down	0.0415
skeletal muscle fiber development	GO	3.14276	1	down	0.0432
phosphorus-oxygen lyase activity	GO	3.14056	1	down	0.0433
regulation of carbohydrate biosynthetic process	GO	3.11475	1	down	0.0444
dorsal/ventral axis specification	GO	3.10723	1	down	0.0447
regulation of interphase of mitotic cell cycle	GO	3.10615	2	down	0.0448
positive T cell selection	GO	3.09983	1	down	0.0451
muscle cell homeostasis	GO	3.09983	1	down	0.0451
cyclase activity	GO	3.09895	1	down	0.0451
actin filament	GO	3.06604	1	down	0.0466
regulation of cellular response to insulin stimulus	GO	3.03669	1	down	0.048
amine transport	GO	3.0295	1	down	0.0483
mesenchymal cell development	GO	3.02192	1	down	0.0487
microtubule motor activity	GO	3.01397	1	down	0.0491
antioxidant activity	GO	2.99306	1	down	0.0501
cell-substrate adhesion	GO	2.98934	2	down	0.0503
steroid binding	GO	2.98651	1	down	0.0505
isomerase activity	GO	2.98546	2	down	0.0505
detection of biotic stimulus	GO	2.98546	1	down	0.0505
response to fungus	GO	2.98546	1	down	0.0505
myeloid cell homeostasis	GO	2.97414	1	down	0.0511
regulation of DNA-dependent transcription, initiation	GO	2.96955	1	down	0.0513
sulfur amino acid metabolic process	GO	2.95223	1	down	0.0522
structural constituent of eye lens	GO	2.93503	1	down	0.0531
guanyl-nucleotide exchange factor activity	GO	2.92824	2	down	0.0535
transcription cofactor activity	GO	2.90949	1	down	0.0545
regulation of intrinsic apoptotic signaling pathway	GO	2.89	1	down	0.0556
regulation of peptidyl-lysine acetylation	GO	2.88084	1	down	0.0561
vesicle organization	GO	2.86604	1	down	0.0569
transcription factor binding transcription factor activity	GO	2.8538	2	down	0.0576
muscle fiber development	GO	2.82339	1	down	0.0594
muscle cell development	GO	2.81937	2	down	0.0596
protein binding transcription factor activity	GO	2.8175	2	down	0.0598
lactation	GO	2.80247	1	down	0.0607
lymphocyte activation	GO	2.79407	3	down	0.0612
mitochondrial outer membrane	GO	2.78448	1	down	0.0618
lyase activity	GO	2.77668	2	down	0.0622
cell division	GO	2.7565	1	down	0.0635
positive regulation of viral reproduction	GO	2.75469	1	down	0.0636
microtubule organizing center	GO	2.74981	3	down	0.0639
response to hypoxia	GO	2.74795	2	down	0.0641
bone resorption	GO	2.73772	1	down	0.0647
microtubule basal body	GO	2.73589	1	down	0.0648
response to decreased oxygen levels	GO	2.73427	2	down	0.0649
drug transport	GO	2.71731	1	down	0.0661
vascular smooth muscle cell differentiation	GO	2.70572	1	down	0.0668
thymic T cell selection	GO	2.70572	1	down	0.0668
Golgi cisterna	GO	2.67378	1	down	0.069
organelle outer membrane	GO	2.66587	1	down	0.0695
response to pain	GO	2.66207	1	down	0.0698
glutathione transferase activity	GO	2.65367	1	down	0.0704
organelle subcompartment	GO	2.63596	1	down	0.0716
cellular potassium ion transport	GO	2.63288	1	down	0.0719
potassium ion transmembrane transport	GO	2.63288	1	down	0.0719
outer membrane	GO	2.62945	1	down	0.0721
cellular component disassembly involved in execution phase of apoptosis	GO	2.62269	1	down	0.0726
cysteine-type peptidase activity	GO	2.6193	2	down	0.0729
magnesium ion binding	GO	2.60702	2	down	0.0738
feeding behavior	GO	2.60594	1	down	0.0738
endosomal transport	GO	2.59789	1	down	0.0744
execution phase of apoptosis	GO	2.59006	1	down	0.075
carbohydrate derivative transport	GO	2.55256	1	down	0.0779
protein kinase regulator activity	GO	2.55019	1	down	0.0781
amino sugar metabolic process	GO	2.54328	1	down	0.0786
response to hexose stimulus	GO	2.53707	1	down	0.0791
erythrocyte development	GO	2.50024	1	down	0.0821
deacetylase activity	GO	2.4952	1	down	0.0825
pigmentation	GO	2.47183	1	down	0.0844
mitochondrion organization	GO	2.47032	2	down	0.0846
iron-sulfur cluster binding	GO	2.44218	1	down	0.087
metal cluster binding	GO	2.44218	1	down	0.087
microtubule organizing center organization	GO	2.43275	1	down	0.0878
unfolded protein binding	GO	2.43138	1	down	0.0879
T cell selection	GO	2.42936	1	down	0.0881
response to carbohydrate stimulus	GO	2.42905	1	down	0.0881
neuromuscular process	GO	2.42135	1	down	0.0888
kinase binding	GO	2.41924	3	down	0.089
positive regulation of apoptotic signaling pathway	GO	2.41538	1	down	0.0893
cardiac muscle cell development	GO	2.39588	1	down	0.0911
motor activity	GO	2.39313	1	down	0.0913
chromatin binding	GO	2.36691	3	down	0.0938
response to dsRNA	GO	2.36385	1	down	0.0941
cerebral cortex development	GO	2.33294	1	down	0.097
chromatin DNA binding	GO	2.33241	1	down	0.0971
cell leading edge	GO	2.32489	2	down	0.0978
carbohydrate binding	GO	2.32432	1	down	0.0978
mitochondrial membrane organization	GO	2.3151	1	down	0.0988
regulatory region nucleic acid binding	GO	2.30589	3	down	0.0997
regulatory region DNA binding	GO	2.30589	3	down	0.0997
phosphoprotein binding	GO	2.26711	1	down	0.1036
filopodium	GO	2.26241	1	down	0.1041
bone remodeling	GO	2.25826	1	down	0.1045
nuclear envelope	GO	2.25677	2	down	0.1047
oxidoreductase activity, acting on paired donors, with incorporation or reduction of molecular oxygen	GO	2.25445	1	down	0.1049
defense response to Gram-positive bacterium	GO	2.2353	1	down	0.107
maintenance of protein location in cell	GO	2.23489	1	down	0.107
lymphocyte homeostasis	GO	2.22486	1	down	0.1081
positive regulation of response to DNA damage stimulus	GO	2.22486	1	down	0.1081
cell recognition	GO	2.22021	1	down	0.1086
regulation of viral reproduction	GO	2.19895	1	down	0.1109
cilium part	GO	2.19141	1	down	0.1118
protein localization to plasma membrane	GO	2.16066	1	down	0.1152
midbody	GO	2.14625	1	down	0.1169
transferase activity, transferring acyl groups	GO	2.13433	2	down	0.1183
Golgi stack	GO	2.11395	1	down	0.1208
maintenance of protein location	GO	2.088	1	down	0.1239
signal transduction by p53 class mediator	GO	2.05014	1	down	0.1287
primary cilium	GO	2.04354	1	down	0.1296
lens development in camera-type eye	GO	2.01907	1	down	0.1328
body morphogenesis	GO	2.00986	1	down	0.134
glial cell development	GO	2.00369	1	down	0.1348
beta-catenin binding	GO	1.99022	1	down	0.1367
transferase activity, transferring alkyl or aryl (other than methyl) groups	GO	1.97846	1	down	0.1383
SMAD binding	GO	1.97512	1	down	0.1387
translation initiation factor activity	GO	1.85826	1	down	0.1559
nuclear membrane	GO	1.79395	1	down	0.1663
structure-specific DNA binding	GO	1.78953	2	down	0.167
regulation of actin polymerization or depolymerization	GO	1.75834	1	down	0.1723
Ras guanyl-nucleotide exchange factor activity	GO	1.7189	1	down	0.1793
neuron fate commitment	GO	1.70421	1	down	0.1819
methyltransferase activity	GO	1.6958	1	down	0.1835
cellular component disassembly at cellular level	GO	1.6951	1	down	0.1836
microvillus	GO	1.6812	1	down	0.1862
cellular component disassembly	GO	1.67228	1	down	0.1878
transferase activity, transferring one-carbon groups	GO	1.65879	1	down	0.1904
lamellipodium	GO	1.6519	1	down	0.1917
blastocyst development	GO	1.58005	1	down	0.206
purine-containing compound biosynthetic process	GO	1.57893	1	down	0.2062
response to ionizing radiation	GO	1.57687	1	down	0.2066
transcription regulatory region sequence-specific DNA binding	GO	1.49604	1	down	0.224
translation factor activity, nucleic acid binding	GO	1.48375	1	down	0.2268
methylation	GO	1.46268	1	down	0.2316
apoptotic signaling pathway	GO	1.43969	1	down	0.237
regulation of execution phase of apoptosis	GO	1.43136	1	down	0.239
RNA polymerase II transcription factor binding transcription factor activity	GO	1.43012	1	down	0.2393
PDZ domain binding	GO	1.3166	1	down	0.268
nucleoside phosphate biosynthetic process	GO	1.29123	1	down	0.2749
RNA polymerase II distal enhancer sequence-specific DNA binding transcription factor activity	GO	1.26187	1	down	0.2831
organophosphate biosynthetic process	GO	1.24209	1	down	0.2888
small conjugating protein ligase binding	GO	1.19248	1	down	0.3035
cytosolic part	GO	1.14644	1	down	0.3178
intermediate filament	GO	1.14087	1	down	0.3195
cell cortex	GO	1.09452	1	down	0.3347
aromatic compound biosynthetic process	GO	1.05943	1	down	0.3467
transferase activity, transferring acyl groups other than amino-acyl groups	GO	1.038	1	down	0.3542
mitosis	GO	0.994186	1	down	0.37
nuclear division	GO	0.994186	1	down	0.37
postsynaptic membrane	GO	0.861028	1	down	0.4227
response to DNA damage stimulus	GO	0.818073	2	down	0.4413
synaptic membrane	GO	0.742961	1	down	0.4757
chromatin	GO	0.537276	1	down	0.5843
nuclear chromosome	GO	0.537276	1	down	0.5843
