# Supplementary material for: An NKX2-1/ERK/WNT feedback loop modulates gastric identity and response to targeted therapy in lung adenocarcinoma
Source: eLife. 2021 Apr 6;10:e66788. doi: 10.7554/eLife.66788 (PMC8102067; doi:10.7554/eLife.66788)
Supplement: Supplementary file 7. [file elife-66788-supp7.xlsx]

## Sheet: Summary
Supplementary File 7 - Published gene expression datasets for gastric chief cells

## Sheet: LGR5+CHIEF
NAME	PROBE	DESCRIPTION<br>(from dataset)	GENE SYMBOL	GENE_TITLE	RANK IN GENE LIST	RANK METRIC SCORE	RUNNING ES	CORE ENRICHMENT
row_0	Abca1	na	ABCA1	ATP binding cassette subfamily A member 1 [Source:HGNC Symbol;Acc:HGNC:29]	8	3.21994	0.017291	Yes
row_1	Tppp3	na	TPPP3	tubulin polymerization promoting protein family member 3 [Source:HGNC Symbol;Acc:HGNC:24162]	73	2.59705	0.028789	Yes
row_2	Plk2	na	PLK2	polo like kinase 2 [Source:HGNC Symbol;Acc:HGNC:19699]	94	2.47754	0.0415044	Yes
row_3	Pde2a	na	PDE2A	phosphodiesterase 2A [Source:HGNC Symbol;Acc:HGNC:8777]	165	2.22721	0.050722	Yes
row_4	Alox5ap	na	ALOX5AP	arachidonate 5-lipoxygenase activating protein [Source:HGNC Symbol;Acc:HGNC:436]	189	2.15404	0.0615384	Yes
row_5	Hpgds	na	HPGDS	hematopoietic prostaglandin D synthase [Source:HGNC Symbol;Acc:HGNC:17890]	220	2.07383	0.0716178	Yes
row_6	Plcb2	na	PLCB2	phospholipase C beta 2 [Source:HGNC Symbol;Acc:HGNC:9055]	227	2.0511	0.0825937	Yes
row_7	Vav1	na	VAV1	vav guanine nucleotide exchange factor 1 [Source:HGNC Symbol;Acc:HGNC:12657]	237	2.0222	0.0932837	Yes
row_8	Tuba1a	na	TUBA1A	tubulin alpha 1a [Source:HGNC Symbol;Acc:HGNC:20766]	317	1.86971	0.100161	Yes
row_9	Kctd12	na	KCTD12	potassium channel tetramerization domain containing 12 [Source:HGNC Symbol;Acc:HGNC:14678]	372	1.79317	0.107683	Yes
row_10	4930539E08Rik	na	C6orf222	chromosome 6 open reading frame 222 [Source:HGNC Symbol;Acc:HGNC:33769]	385	1.77392	0.116885	Yes
row_11	Rgs2	na	RGS2	regulator of G protein signaling 2 [Source:HGNC Symbol;Acc:HGNC:9998]	390	1.7655	0.126383	Yes
row_12	Cyp4v3	na	CYP4V2	cytochrome P450 family 4 subfamily V member 2 [Source:HGNC Symbol;Acc:HGNC:23198]	400	1.75769	0.135624	Yes
row_13	Cdo1	na	CDO1	cysteine dioxygenase type 1 [Source:HGNC Symbol;Acc:HGNC:1795]	406	1.75045	0.144996	Yes
row_14	Fbxl21	na	null	null	411	1.74424	0.154377	Yes
row_15	Alox5	na	ALOX5	arachidonate 5-lipoxygenase [Source:HGNC Symbol;Acc:HGNC:435]	428	1.71634	0.163095	Yes
row_16	Smoc2	na	SMOC2	SPARC related modular calcium binding 2 [Source:HGNC Symbol;Acc:HGNC:20323]	462	1.66956	0.170833	Yes
row_17	Myo15b	na	MYO15B	myosin XVB [Source:HGNC Symbol;Acc:HGNC:14083]	476	1.65369	0.179335	Yes
row_18	Adra2a	na	ADRA2A	adrenoceptor alpha 2A [Source:HGNC Symbol;Acc:HGNC:281]	485	1.64646	0.18801	Yes
row_19	Hepacam2	na	HEPACAM2	HEPACAM family member 2 [Source:HGNC Symbol;Acc:HGNC:27364]	497	1.6291	0.196462	Yes
row_20	Pik3r5	na	PIK3R5	phosphoinositide-3-kinase regulatory subunit 5 [Source:HGNC Symbol;Acc:HGNC:30035]	508	1.62331	0.204926	Yes
row_21	Inpp5j	na	INPP5J	inositol polyphosphate-5-phosphatase J [Source:HGNC Symbol;Acc:HGNC:8956]	516	1.61648	0.213479	Yes
row_22	Cd300lf	na	CD300LF	CD300 molecule like family member f [Source:HGNC Symbol;Acc:HGNC:29883]	520	1.61274	0.222183	Yes
row_23	Cckar	na	CCKAR	cholecystokinin A receptor [Source:HGNC Symbol;Acc:HGNC:1570]	536	1.59737	0.230291	Yes
row_24	Ltc4s	na	LTC4S	leukotriene C4 synthase [Source:HGNC Symbol;Acc:HGNC:6719]	547	1.58882	0.238566	Yes
row_25	Inpp5d	na	INPP5D	inositol polyphosphate-5-phosphatase D [Source:HGNC Symbol;Acc:HGNC:6079]	572	1.57054	0.246144	Yes
row_26	Pou2f3	na	POU2F3	POU class 2 homeobox 3 [Source:HGNC Symbol;Acc:HGNC:19864]	578	1.56603	0.254507	Yes
row_27	Fxyd6	na	FXYD6	FXYD domain containing ion transport regulator 6 [Source:HGNC Symbol;Acc:HGNC:4030]	593	1.55468	0.262424	Yes
row_28	Eml6	na	EML6	EMAP like 6 [Source:HGNC Symbol;Acc:HGNC:35412]	655	1.50005	0.268043	Yes
row_29	A4galt	na	A4GALT	alpha 1,4-galactosyltransferase (P blood group) [Source:HGNC Symbol;Acc:HGNC:18149]	698	1.4691	0.274301	Yes
row_30	Slc9a9	na	SLC9A9	solute carrier family 9 member A9 [Source:HGNC Symbol;Acc:HGNC:20653]	752	1.43626	0.27991	Yes
row_31	Ehf	na	EHF	ETS homologous factor [Source:HGNC Symbol;Acc:HGNC:3246]	768	1.42052	0.287051	Yes
row_32	Clec14a	na	CLEC14A	C-type lectin domain containing 14A [Source:HGNC Symbol;Acc:HGNC:19832]	811	1.39642	0.29291	Yes
row_33	Dmxl2	na	DMXL2	Dmx like 2 [Source:HGNC Symbol;Acc:HGNC:2938]	901	1.34236	0.296474	Yes
row_34	Rac2	na	RAC2	Rac family small GTPase 2 [Source:HGNC Symbol;Acc:HGNC:9802]	921	1.32893	0.302943	Yes
row_35	Blnk	na	BLNK	B cell linker [Source:HGNC Symbol;Acc:HGNC:14211]	932	1.32338	0.309764	Yes
row_36	Gprc5c	na	GPRC5C	G protein-coupled receptor class C group 5 member C [Source:HGNC Symbol;Acc:HGNC:13309]	935	1.32194	0.316917	Yes
row_37	Cpvl	na	CPVL	carboxypeptidase vitellogenic like [Source:HGNC Symbol;Acc:HGNC:14399]	1045	1.26401	0.319202	Yes
row_38	Pcolce2	na	PCOLCE2	procollagen C-endopeptidase enhancer 2 [Source:HGNC Symbol;Acc:HGNC:8739]	1049	1.26184	0.325984	Yes
row_39	Ly6g6f	na	LY6G6F	lymphocyte antigen 6 family member G6F [Source:HGNC Symbol;Acc:HGNC:13933]	1051	1.26159	0.332849	Yes
row_40	Pstpip2	na	PSTPIP2	proline-serine-threonine phosphatase interacting protein 2 [Source:HGNC Symbol;Acc:HGNC:9581]	1102	1.2383	0.337503	Yes
row_41	Tas1r3	na	TAS1R3	taste 1 receptor member 3 [Source:HGNC Symbol;Acc:HGNC:15661]	1159	1.21574	0.341777	Yes
row_42	1810046K07Rik	na	C11orf53	chromosome 11 open reading frame 53 [Source:HGNC Symbol;Acc:HGNC:30527]	1171	1.21278	0.34795	Yes
row_43	Sh2d7	na	SH2D7	SH2 domain containing 7 [Source:HGNC Symbol;Acc:HGNC:34549]	1173	1.21208	0.354545	Yes
row_44	Txndc16	na	TXNDC16	thioredoxin domain containing 16 [Source:HGNC Symbol;Acc:HGNC:19965]	1228	1.19253	0.358777	Yes
row_45	Ptprc	na	PTPRC	protein tyrosine phosphatase receptor type C [Source:HGNC Symbol;Acc:HGNC:9666]	1260	1.17765	0.363907	Yes
row_46	Robo2	na	ROBO2	roundabout guidance receptor 2 [Source:HGNC Symbol;Acc:HGNC:10250]	1275	1.17264	0.369732	Yes
row_47	Spib	na	SPIB	Spi-B transcription factor [Source:HGNC Symbol;Acc:HGNC:11242]	1344	1.14727	0.373122	Yes
row_48	Rab11fip4	na	RAB11FIP4	RAB11 family interacting protein 4 [Source:HGNC Symbol;Acc:HGNC:30267]	1389	1.12885	0.377431	Yes
row_49	Trpm5	na	TRPM5	transient receptor potential cation channel subfamily M member 5 [Source:HGNC Symbol;Acc:HGNC:14323]	1477	1.10069	0.379757	Yes
row_50	Lrmp	na	LRMP	lymphoid restricted membrane protein [Source:HGNC Symbol;Acc:HGNC:6690]	1486	1.09858	0.385432	Yes
row_51	Kit	na	KIT	KIT proto-oncogene, receptor tyrosine kinase [Source:HGNC Symbol;Acc:HGNC:6342]	1496	1.09615	0.391052	Yes
row_52	St18	na	ST18	ST18 C2H2C-type zinc finger transcription factor [Source:HGNC Symbol;Acc:HGNC:18695]	1560	1.07357	0.39425	Yes
row_53	Ddah1	na	DDAH1	dimethylarginine dimethylaminohydrolase 1 [Source:HGNC Symbol;Acc:HGNC:2715]	1636	1.05201	0.39682	Yes
row_54	Fam49a	na	FAM49A	family with sequence similarity 49 member A [Source:HGNC Symbol;Acc:HGNC:25373]	1704	1.03355	0.399629	Yes
row_55	Itpr2	na	ITPR2	inositol 1,4,5-trisphosphate receptor type 2 [Source:HGNC Symbol;Acc:HGNC:6181]	1773	1.01718	0.402306	Yes
row_56	Pik3cg	na	PIK3CG	phosphatidylinositol-4,5-bisphosphate 3-kinase catalytic subunit gamma [Source:HGNC Symbol;Acc:HGNC:8978]	1787	1.01254	0.407297	Yes
row_57	Il13ra1	na	IL13RA1	interleukin 13 receptor subunit alpha 1 [Source:HGNC Symbol;Acc:HGNC:5974]	1821	1.00439	0.411393	Yes
row_58	Wnk2	na	WNK2	WNK lysine deficient protein kinase 2 [Source:HGNC Symbol;Acc:HGNC:14542]	1856	0.995483	0.415398	Yes
row_59	Hmx3	na	HMX3	H6 family homeobox 3 [Source:HGNC Symbol;Acc:HGNC:5019]	1874	0.988465	0.420087	Yes
row_60	Dclk1	na	DCLK1	doublecortin like kinase 1 [Source:HGNC Symbol;Acc:HGNC:2700]	1906	0.977937	0.424123	Yes
row_61	Gfi1b	na	GFI1B	growth factor independent 1B transcriptional repressor [Source:HGNC Symbol;Acc:HGNC:4238]	1913	0.975868	0.429212	Yes
row_62	Ccdc129	na	ITPRID1	ITPR interacting domain containing 1 [Source:HGNC Symbol;Acc:HGNC:27363]	1968	0.962033	0.432182	Yes
row_63	Scn7a	na	SCN7A	sodium voltage-gated channel alpha subunit 7 [Source:HGNC Symbol;Acc:HGNC:10594]	2005	0.953909	0.435874	Yes
row_64	Hmx2	na	HMX2	H6 family homeobox 2 [Source:HGNC Symbol;Acc:HGNC:5018]	2023	0.949549	0.44035	Yes
row_65	Clmn	na	CLMN	calmin [Source:HGNC Symbol;Acc:HGNC:19972]	2034	0.947503	0.445113	Yes
row_66	Nkd1	na	NKD1	NKD inhibitor of WNT signaling pathway 1 [Source:HGNC Symbol;Acc:HGNC:17045]	2204	0.900166	0.442853	Yes
row_67	Cldn7	na	CLDN7	claudin 7 [Source:HGNC Symbol;Acc:HGNC:2049]	2214	0.898357	0.447389	Yes
row_68	Prox1	na	PROX1	prospero homeobox 1 [Source:HGNC Symbol;Acc:HGNC:9459]	2246	0.89282	0.450959	Yes
row_69	Ano6	na	ANO6	anoctamin 6 [Source:HGNC Symbol;Acc:HGNC:25240]	2270	0.88754	0.45484	Yes
row_70	Trak1	na	TRAK1	trafficking kinesin protein 1 [Source:HGNC Symbol;Acc:HGNC:29947]	2425	0.853235	0.452961	Yes
row_71	Hck	na	HCK	HCK proto-oncogene, Src family tyrosine kinase [Source:HGNC Symbol;Acc:HGNC:4840]	2512	0.836811	0.453885	Yes
row_72	Agt	na	AGT	angiotensinogen [Source:HGNC Symbol;Acc:HGNC:333]	2526	0.833495	0.457896	Yes
row_73	Sh2d6	na	SH2D6	SH2 domain containing 6 [Source:HGNC Symbol;Acc:HGNC:30439]	2546	0.830942	0.461637	Yes
row_74	Tmem229a	na	TMEM229A	transmembrane protein 229A [Source:HGNC Symbol;Acc:HGNC:37279]	2573	0.82588	0.465054	Yes
row_75	Ptpn6	na	PTPN6	protein tyrosine phosphatase non-receptor type 6 [Source:HGNC Symbol;Acc:HGNC:9658]	2680	0.802815	0.46494	Yes
row_76	Foxe1	na	FOXE1	forkhead box E1 [Source:HGNC Symbol;Acc:HGNC:3806]	2687	0.802202	0.469078	Yes
row_77	Bcl2l14	na	BCL2L14	BCL2 like 14 [Source:HGNC Symbol;Acc:HGNC:16657]	2743	0.791393	0.471071	Yes
row_78	Naip6	na	null	null	2795	0.781939	0.473183	Yes
row_79	Rnasel	na	RNASEL	ribonuclease L [Source:HGNC Symbol;Acc:HGNC:10050]	2806	0.780846	0.477034	Yes
row_80	Nrgn	na	NRGN	neurogranin [Source:HGNC Symbol;Acc:HGNC:8000]	2809	0.78023	0.481221	Yes
row_81	Tek	na	TEK	TEK receptor tyrosine kinase [Source:HGNC Symbol;Acc:HGNC:11724]	3057	0.741802	0.474775	No
row_82	Pcdh20	na	AL592490.1	novel protein	3115	0.732939	0.476364	No
row_83	Naip5	na	null	null	3257	0.71052	0.474256	No
row_84	Myo1b	na	MYO1B	myosin IB [Source:HGNC Symbol;Acc:HGNC:7596]	3277	0.707682	0.477323	No
row_85	Rgs13	na	RGS13	regulator of G protein signaling 13 [Source:HGNC Symbol;Acc:HGNC:9995]	3292	0.705168	0.480589	No
row_86	Clec4a1	na	CLEC4A	C-type lectin domain family 4 member A [Source:HGNC Symbol;Acc:HGNC:13257]	3419	0.685889	0.478984	No
row_87	Pgm2l1	na	PGM2L1	phosphoglucomutase 2 like 1 [Source:HGNC Symbol;Acc:HGNC:20898]	3554	0.664387	0.476922	No
row_88	Inhbc	na	INHBC	inhibin subunit beta C [Source:HGNC Symbol;Acc:HGNC:6068]	3608	0.658175	0.478271	No
row_89	Il17rb	na	IL17RB	interleukin 17 receptor B [Source:HGNC Symbol;Acc:HGNC:18015]	3646	0.652132	0.480268	No
row_90	Bmx	na	BMX	BMX non-receptor tyrosine kinase [Source:HGNC Symbol;Acc:HGNC:1079]	3766	0.635573	0.478686	No
row_91	Heg1	na	HEG1	heart development protein with EGF like domains 1 [Source:HGNC Symbol;Acc:HGNC:29227]	4179	0.579685	0.464333	No
row_92	2210414B05Rik	na	null	null	4402	0.551359	0.457908	No
row_93	Dio1	na	DIO1	iodothyronine deiodinase 1 [Source:HGNC Symbol;Acc:HGNC:2883]	4408	0.550782	0.460711	No
row_94	Sct	na	SCT	secretin [Source:HGNC Symbol;Acc:HGNC:10607]	5026	0.489259	0.437143	No
row_95	Zfp428	na	ZNF428	zinc finger protein 428 [Source:HGNC Symbol;Acc:HGNC:20804]	5525	0.438317	0.418358	No
row_96	Gm17660	na	null	null	5623	0.42868	0.416579	No
row_97	Rassf6	na	RASSF6	Ras association domain family member 6 [Source:HGNC Symbol;Acc:HGNC:20796]	5888	0.401025	0.407544	No
row_98	Mical1	na	MICAL1	microtubule associated monooxygenase, calponin and LIM domain containing 1 [Source:HGNC Symbol;Acc:HGNC:20619]	5957	0.394417	0.406811	No
row_99	Cdhr5	na	CDHR5	cadherin related family member 5 [Source:HGNC Symbol;Acc:HGNC:7521]	6489	0.350999	0.386144	No
row_100	Fes	na	FES	FES proto-oncogene, tyrosine kinase [Source:HGNC Symbol;Acc:HGNC:3657]	6610	0.342319	0.382913	No
row_101	Vil1	na	VIL1	villin 1 [Source:HGNC Symbol;Acc:HGNC:12690]	6968	0.312827	0.369439	No
row_102	Fyb	na	FYB1	FYN binding protein 1 [Source:HGNC Symbol;Acc:HGNC:4036]	7489	0.271775	0.348806	No
row_103	Sez6l2	na	SEZ6L2	seizure related 6 homolog like 2 [Source:HGNC Symbol;Acc:HGNC:30844]	7552	0.267254	0.347632	No
row_104	Efnb2	na	EFNB2	ephrin B2 [Source:HGNC Symbol;Acc:HGNC:3227]	7669	0.258391	0.344112	No
row_105	St6gal2	na	ST6GAL2	ST6 beta-galactoside alpha-2,6-sialyltransferase 2 [Source:HGNC Symbol;Acc:HGNC:10861]	7803	0.249216	0.339819	No
row_106	Fcna	na	null	null	7949	0.239482	0.334962	No
row_107	Ildr1	na	ILDR1	immunoglobulin like domain containing receptor 1 [Source:HGNC Symbol;Acc:HGNC:28741]	8014	0.235807	0.333531	No
row_108	Ascl1	na	ASCL1	achaete-scute family bHLH transcription factor 1 [Source:HGNC Symbol;Acc:HGNC:738]	8027	0.23481	0.334306	No
row_109	4833423E24Rik	na	null	null	8329	0.214034	0.322673	No
row_110	Clic5	na	CLIC5	chloride intracellular channel 5 [Source:HGNC Symbol;Acc:HGNC:13517]	8366	0.211199	0.322298	No
row_111	Gm12888	na	null	null	8593	0.197093	0.313763	No
row_112	Ceacam10	na	null	null	8932	0.174045	0.300338	No
row_113	Skap2	na	SKAP2	src kinase associated phosphoprotein 2 [Source:HGNC Symbol;Acc:HGNC:15687]	9238	0.15192	0.288195	No
row_114	Nav2	na	NAV2	neuron navigator 2 [Source:HGNC Symbol;Acc:HGNC:15997]	9625	0.12734	0.272471	No
row_115	Cfb	na	CFB	complement factor B [Source:HGNC Symbol;Acc:HGNC:1037]	10647	0.0646616	0.229392	No
row_116	Slc7a5	na	SLC7A5	solute carrier family 7 member 5 [Source:HGNC Symbol;Acc:HGNC:11063]	10689	0.0626569	0.22799	No
row_117	Gm5662	na	EIF1AY	eukaryotic translation initiation factor 1A Y-linked [Source:HGNC Symbol;Acc:HGNC:3252]	10751	0.0592957	0.22572	No
row_118	Gm4952	na	null	null	10761	0.0587398	0.225659	No
row_119	Atp2a3	na	ATP2A3	ATPase sarcoplasmic/endoplasmic reticulum Ca2+ transporting 3 [Source:HGNC Symbol;Acc:HGNC:813]	11180	0.0333756	0.20806	No
row_120	Nebl	na	null	null	11814	-0.0027337	0.181147	No
row_121	Ptpn18	na	PTPN18	protein tyrosine phosphatase non-receptor type 18 [Source:HGNC Symbol;Acc:HGNC:9649]	12326	-0.0344082	0.159597	No
row_122	Lrrtm3	na	LRRTM3	leucine rich repeat transmembrane neuronal 3 [Source:HGNC Symbol;Acc:HGNC:19410]	12653	-0.0558515	0.146034	No
row_123	Pate4	na	PATE4	prostate and testis expressed 4 [Source:HGNC Symbol;Acc:HGNC:35427]	12844	-0.0662894	0.138315	No
row_124	Tssc4	na	TSSC4	tumor suppressing subtransferable candidate 4 [Source:HGNC Symbol;Acc:HGNC:12386]	13390	-0.0998637	0.115677	No
row_125	Pfkfb3	na	PFKFB3	6-phosphofructo-2-kinase/fructose-2,6-biphosphatase 3 [Source:HGNC Symbol;Acc:HGNC:8874]	13732	-0.120122	0.101828	No
row_126	Psd3	na	PSD3	pleckstrin and Sec7 domain containing 3 [Source:HGNC Symbol;Acc:HGNC:19093]	14039	-0.139309	0.0895738	No
row_127	Ccnj	na	CCNJ	cyclin J [Source:HGNC Symbol;Acc:HGNC:23434]	14132	-0.14549	0.0864567	No
row_128	Reg3g	na	REG1B	regenerating family member 1 beta [Source:HGNC Symbol;Acc:HGNC:9952]	14161	-0.147238	0.0860718	No
row_129	Rgs22	na	RGS22	regulator of G protein signaling 22 [Source:HGNC Symbol;Acc:HGNC:24499]	14346	-0.159716	0.0791189	No
row_130	Ptpre	na	PTPRE	protein tyrosine phosphatase receptor type E [Source:HGNC Symbol;Acc:HGNC:9669]	14460	-0.167455	0.0752287	No
row_131	B4galt5	na	B4GALT5	beta-1,4-galactosyltransferase 5 [Source:HGNC Symbol;Acc:HGNC:928]	14471	-0.168065	0.0757236	No
row_132	Dgki	na	DGKI	diacylglycerol kinase iota [Source:HGNC Symbol;Acc:HGNC:2855]	14515	-0.170894	0.0748301	No
row_133	Rbm38	na	RBM38	RNA binding motif protein 38 [Source:HGNC Symbol;Acc:HGNC:15818]	14791	-0.188934	0.064166	No
row_134	Sostdc1	na	SOSTDC1	sclerostin domain containing 1 [Source:HGNC Symbol;Acc:HGNC:21748]	15076	-0.20675	0.0532166	No
row_135	Cyp17a1	na	CYP17A1	cytochrome P450 family 17 subfamily A member 1 [Source:HGNC Symbol;Acc:HGNC:2593]	16972	-0.343116	-0.0255189	No
row_136	Smpx	na	SMPX	small muscle protein X-linked [Source:HGNC Symbol;Acc:HGNC:11122]	17055	-0.348917	-0.0270967	No
row_137	Ypel2	na	YPEL2	yippee like 2 [Source:HGNC Symbol;Acc:HGNC:18326]	17069	-0.349553	-0.0257356	No
row_138	Pik3r3	na	PIK3R3	phosphoinositide-3-kinase regulatory subunit 3 [Source:HGNC Symbol;Acc:HGNC:8981]	17140	-0.353983	-0.0267752	No
row_139	Plcg2	na	PLCG2	phospholipase C gamma 2 [Source:NCBI gene;Acc:5336]	17425	-0.377597	-0.0367891	No
row_140	Ano7	na	ANO7	anoctamin 7 [Source:HGNC Symbol;Acc:HGNC:31677]	17456	-0.380284	-0.035983	No
row_141	Mug1	na	PZP	PZP alpha-2-macroglobulin like [Source:HGNC Symbol;Acc:HGNC:9750]	18097	-0.43309	-0.0608375	No
row_142	Ero1lb	na	ERO1B	endoplasmic reticulum oxidoreductase 1 beta [Source:HGNC Symbol;Acc:HGNC:14355]	18175	-0.440136	-0.0617031	No
row_143	Cyp11a1	na	CYP11A1	cytochrome P450 family 11 subfamily A member 1 [Source:HGNC Symbol;Acc:HGNC:2590]	19455	-0.565567	-0.113016	No
row_144	Shisa6	na	SHISA6	shisa family member 6 [Source:HGNC Symbol;Acc:HGNC:34491]	20189	-0.654088	-0.140616	No
row_145	Tmem176b	na	TMEM176B	transmembrane protein 176B [Source:HGNC Symbol;Acc:HGNC:29596]	20313	-0.669686	-0.142182	No
row_146	Ifitm3	na	IFITM3	interferon induced transmembrane protein 3 [Source:HGNC Symbol;Acc:HGNC:5414]	20450	-0.692979	-0.144173	No
row_147	Cldn3	na	CLDN3	claudin 3 [Source:HGNC Symbol;Acc:HGNC:2045]	20979	-0.783735	-0.162343	No
row_148	Mctp1	na	MCTP1	multiple C2 and transmembrane domain containing 1 [Source:HGNC Symbol;Acc:HGNC:26183]	21048	-0.797609	-0.160868	No
row_149	Bhlha15	na	BHLHA15	basic helix-loop-helix family member a15 [Source:HGNC Symbol;Acc:HGNC:22265]	21394	-0.869301	-0.170784	No
row_150	Dpysl2	na	DPYSL2	dihydropyrimidinase like 2 [Source:HGNC Symbol;Acc:HGNC:3014]	21545	-0.901818	-0.172227	No
row_151	Cdkn1a	na	CDKN1A	cyclin dependent kinase inhibitor 1A [Source:HGNC Symbol;Acc:HGNC:1784]	21564	-0.908301	-0.16802	No
row_152	Furin	na	FURIN	furin, paired basic amino acid cleaving enzyme [Source:HGNC Symbol;Acc:HGNC:8568]	21566	-0.909462	-0.163082	No
row_153	Tspan6	na	TSPAN6	tetraspanin 6 [Source:HGNC Symbol;Acc:HGNC:11858]	21952	-1.02019	-0.173874	No
row_154	Blm	na	BLM	BLM RecQ like helicase [Source:HGNC Symbol;Acc:HGNC:1058]	22182	-1.10731	-0.177553	No
row_155	Tmem176a	na	TMEM176A	transmembrane protein 176A [Source:HGNC Symbol;Acc:HGNC:24930]	22226	-1.12682	-0.173212	No
row_156	Ptgs2	na	PTGS2	prostaglandin-endoperoxide synthase 2 [Source:HGNC Symbol;Acc:HGNC:9605]	22328	-1.1779	-0.171059	No
row_157	Svil	na	SVIL	supervillin [Source:HGNC Symbol;Acc:HGNC:11480]	22361	-1.19152	-0.165895	No
row_158	Aldh2	na	ALDH2	aldehyde dehydrogenase 2 family member [Source:HGNC Symbol;Acc:HGNC:404]	22482	-1.25436	-0.164132	No
row_159	Mfsd7c	na	FLVCR2	feline leukemia virus subgroup C cellular receptor family member 2 [Source:HGNC Symbol;Acc:HGNC:20105]	22596	-1.32033	-0.161709	No
row_160	Cd177	na	CD177	CD177 molecule [Source:HGNC Symbol;Acc:HGNC:30072]	22690	-1.38916	-0.158059	No
row_161	Lrrn1	na	LRRN1	leucine rich repeat neuronal 1 [Source:HGNC Symbol;Acc:HGNC:20980]	22722	-1.40783	-0.151669	No
row_162	Chtf18	na	CHTF18	chromosome transmission fidelity factor 18 [Source:HGNC Symbol;Acc:HGNC:18435]	22864	-1.51386	-0.149378	No
row_163	Cdhr2	na	CDHR2	cadherin related family member 2 [Source:HGNC Symbol;Acc:HGNC:18231]	22941	-1.5814	-0.143951	No
row_164	Hgfac	na	HGFAC	HGF activator [Source:HGNC Symbol;Acc:HGNC:4894]	22975	-1.60888	-0.136546	No
row_165	Acot7	na	ACOT7	acyl-CoA thioesterase 7 [Source:HGNC Symbol;Acc:HGNC:24157]	22989	-1.62373	-0.128208	No
row_166	Gas7	na	AC005747.1	growth arrest specific 7 [Source:NCBI gene;Acc:8522]	23144	-1.81066	-0.124844	No
row_167	Pygl	na	PYGL	glycogen phosphorylase L [Source:HGNC Symbol;Acc:HGNC:9725]	23260	-1.97697	-0.118911	No
row_168	Ctsc	na	CTSC	cathepsin C [Source:HGNC Symbol;Acc:HGNC:2528]	23287	-2.02678	-0.108919	No
row_169	Ceacam1	na	CEACAM1	carcinoembryonic antigen related cell adhesion molecule 1 [Source:HGNC Symbol;Acc:HGNC:1814]	23312	-2.06215	-0.0986485	No
row_170	Ptgs1	na	PTGS1	prostaglandin-endoperoxide synthase 1 [Source:HGNC Symbol;Acc:HGNC:9604]	23332	-2.09726	-0.0879729	No
row_171	Ahnak2	na	AHNAK2	AHNAK nucleoprotein 2 [Source:HGNC Symbol;Acc:HGNC:20125]	23416	-2.30158	-0.0789011	No
row_172	Avil	na	AVIL	advillin [Source:HGNC Symbol;Acc:HGNC:14188]	23443	-2.37237	-0.0670168	No
row_173	Abhd2	na	ABHD2	abhydrolase domain containing 2 [Source:HGNC Symbol;Acc:HGNC:18717]	23448	-2.38749	-0.0541138	No
row_174	Cpe	na	CPE	carboxypeptidase E [Source:HGNC Symbol;Acc:HGNC:2303]	23471	-2.45495	-0.0416072	No
row_175	Ms4a8a	na	MS4A8	membrane spanning 4-domains A8 [Source:HGNC Symbol;Acc:HGNC:13380]	23472	-2.46625	-0.0281028	No
row_176	Sema7a	na	SEMA7A	semaphorin 7A (John Milton Hagen blood group) [Source:HGNC Symbol;Acc:HGNC:10741]	23607	-3.14776	-0.0165672	No
row_177	Pnliprp2	na	PNLIPRP2	pancreatic lipase related protein 2 (gene/pseudogene) [Source:HGNC Symbol;Acc:HGNC:9157]	23646	-3.61605	0.00161659	No
