# Supplementary material for: An NKX2-1/ERK/WNT feedback loop modulates gastric identity and response to targeted therapy in lung adenocarcinoma
Source: eLife. 2021 Apr 6;10:e66788. doi: 10.7554/eLife.66788 (PMC8102067; doi:10.7554/eLife.66788)
Supplement: Supplementary file 8. [file elife-66788-supp8.xlsx]

## Sheet: Summary
Supplementary File 8 - Published gene expression datasets for tuft cells

## Sheet: TUFT
NAME	PROBE	DESCRIPTION<br>(from dataset)	GENE SYMBOL	GENE_TITLE	RANK IN GENE LIST	RANK METRIC SCORE	RUNNING ES	CORE ENRICHMENT
row_0	Alox5ap	na	ALOX5AP	arachidonate 5-lipoxygenase activating protein [Source:HGNC Symbol;Acc:HGNC:436]	189	2.15404	0.0155099	Yes
row_1	Hpgds	na	HPGDS	hematopoietic prostaglandin D synthase [Source:HGNC Symbol;Acc:HGNC:17890]	220	2.07383	0.0368855	Yes
row_2	Vav1	na	VAV1	vav guanine nucleotide exchange factor 1 [Source:HGNC Symbol;Acc:HGNC:12657]	237	2.0222	0.0582908	Yes
row_3	Cd24a	na	null	null	300	1.89305	0.0763354	Yes
row_4	Tuba1a	na	TUBA1A	tubulin alpha 1a [Source:HGNC Symbol;Acc:HGNC:20766]	317	1.86971	0.0960754	Yes
row_5	Kctd12	na	KCTD12	potassium channel tetramerization domain containing 12 [Source:HGNC Symbol;Acc:HGNC:14678]	372	1.79317	0.113368	Yes
row_6	Rgs2	na	RGS2	regulator of G protein signaling 2 [Source:HGNC Symbol;Acc:HGNC:9998]	390	1.7655	0.131928	Yes
row_7	St6galnac2	na	AC015802.6	novel protein	407	1.74913	0.150351	Yes
row_8	Alox5	na	ALOX5	arachidonate 5-lipoxygenase [Source:HGNC Symbol;Acc:HGNC:435]	428	1.71634	0.168247	Yes
row_9	Pik3r5	na	PIK3R5	phosphoinositide-3-kinase regulatory subunit 5 [Source:HGNC Symbol;Acc:HGNC:30035]	508	1.62331	0.182625	Yes
row_10	Inpp5j	na	INPP5J	inositol polyphosphate-5-phosphatase J [Source:HGNC Symbol;Acc:HGNC:8956]	516	1.61648	0.199981	Yes
row_11	Ltc4s	na	LTC4S	leukotriene C4 synthase [Source:HGNC Symbol;Acc:HGNC:6719]	547	1.58882	0.21606	Yes
row_12	Krt23	na	KRT23	keratin 23 [Source:HGNC Symbol;Acc:HGNC:6438]	555	1.58286	0.233049	Yes
row_13	Inpp5d	na	INPP5D	inositol polyphosphate-5-phosphatase D [Source:HGNC Symbol;Acc:HGNC:6079]	572	1.57054	0.249522	Yes
row_14	Pou2f3	na	POU2F3	POU class 2 homeobox 3 [Source:HGNC Symbol;Acc:HGNC:19864]	578	1.56603	0.266412	Yes
row_15	Adh1	na	ADH1C	alcohol dehydrogenase 1C (class I), gamma polypeptide [Source:HGNC Symbol;Acc:HGNC:251]	757	1.42985	0.27448	Yes
row_16	Gng13	na	GNG13	G protein subunit gamma 13 [Source:HGNC Symbol;Acc:HGNC:14131]	917	1.33086	0.282272	Yes
row_17	Rac2	na	RAC2	Rac family small GTPase 2 [Source:HGNC Symbol;Acc:HGNC:9802]	921	1.32893	0.296658	Yes
row_18	Gprc5c	na	GPRC5C	G protein-coupled receptor class C group 5 member C [Source:HGNC Symbol;Acc:HGNC:13309]	935	1.32194	0.310543	Yes
row_19	Ly6g6f	na	LY6G6F	lymphocyte antigen 6 family member G6F [Source:HGNC Symbol;Acc:HGNC:13933]	1051	1.26159	0.319444	Yes
row_20	1810046K07Rik	na	C11orf53	chromosome 11 open reading frame 53 [Source:HGNC Symbol;Acc:HGNC:30527]	1171	1.21278	0.327643	Yes
row_21	Sh2d7	na	SH2D7	SH2 domain containing 7 [Source:HGNC Symbol;Acc:HGNC:34549]	1173	1.21208	0.340837	Yes
row_22	Matk	na	MATK	megakaryocyte-associated tyrosine kinase [Source:HGNC Symbol;Acc:HGNC:6906]	1320	1.15475	0.347258	Yes
row_23	Siglecf	na	CD33	CD33 molecule [Source:HGNC Symbol;Acc:HGNC:1659]	1341	1.14859	0.358953	Yes
row_24	Spib	na	SPIB	Spi-B transcription factor [Source:HGNC Symbol;Acc:HGNC:11242]	1344	1.14727	0.371397	Yes
row_25	Fam221a	na	FAM221A	family with sequence similarity 221 member A [Source:HGNC Symbol;Acc:HGNC:27977]	1435	1.11508	0.379758	Yes
row_26	Trpm5	na	TRPM5	transient receptor potential cation channel subfamily M member 5 [Source:HGNC Symbol;Acc:HGNC:14323]	1477	1.10069	0.39004	Yes
row_27	Tmem45b	na	TMEM45B	transmembrane protein 45B [Source:HGNC Symbol;Acc:HGNC:25194]	1485	1.09867	0.401742	Yes
row_28	Lrmp	na	LRMP	lymphoid restricted membrane protein [Source:HGNC Symbol;Acc:HGNC:6690]	1486	1.09858	0.413739	Yes
row_29	Tmem9	na	TMEM9	transmembrane protein 9 [Source:HGNC Symbol;Acc:HGNC:18823]	1523	1.08871	0.424102	Yes
row_30	Pim3	na	PIM3	Pim-3 proto-oncogene, serine/threonine kinase [Source:HGNC Symbol;Acc:HGNC:19310]	1679	1.0409	0.428897	Yes
row_31	Pla2g4a	na	PLA2G4A	phospholipase A2 group IVA [Source:HGNC Symbol;Acc:HGNC:9035]	1727	1.02677	0.438117	Yes
row_32	Itpr2	na	ITPR2	inositol 1,4,5-trisphosphate receptor type 2 [Source:HGNC Symbol;Acc:HGNC:6181]	1773	1.01718	0.447317	Yes
row_33	Pik3cg	na	PIK3CG	phosphatidylinositol-4,5-bisphosphate 3-kinase catalytic subunit gamma [Source:HGNC Symbol;Acc:HGNC:8978]	1787	1.01254	0.457824	Yes
row_34	Il13ra1	na	IL13RA1	interleukin 13 receptor subunit alpha 1 [Source:HGNC Symbol;Acc:HGNC:5974]	1821	1.00439	0.467393	Yes
row_35	Dclk1	na	DCLK1	doublecortin like kinase 1 [Source:HGNC Symbol;Acc:HGNC:2700]	1906	0.977937	0.474511	Yes
row_36	Gimap1	na	GIMAP1	GTPase, IMAP family member 1 [Source:HGNC Symbol;Acc:HGNC:23237]	1971	0.961665	0.4823	Yes
row_37	Hmx2	na	HMX2	H6 family homeobox 2 [Source:HGNC Symbol;Acc:HGNC:5018]	2023	0.949549	0.490507	Yes
row_38	Gga2	na	GGA2	golgi associated, gamma adaptin ear containing, ARF binding protein 2 [Source:HGNC Symbol;Acc:HGNC:16064]	2104	0.924976	0.497217	Yes
row_39	Hck	na	HCK	HCK proto-oncogene, Src family tyrosine kinase [Source:HGNC Symbol;Acc:HGNC:4840]	2512	0.836811	0.489098	Yes
row_40	Agt	na	AGT	angiotensinogen [Source:HGNC Symbol;Acc:HGNC:333]	2526	0.833495	0.497649	Yes
row_41	Sh2d6	na	SH2D6	SH2 domain containing 6 [Source:HGNC Symbol;Acc:HGNC:30439]	2546	0.830942	0.505918	Yes
row_42	Ptpn6	na	PTPN6	protein tyrosine phosphatase non-receptor type 6 [Source:HGNC Symbol;Acc:HGNC:9658]	2680	0.802815	0.509046	Yes
row_43	Bcl2l14	na	BCL2L14	BCL2 like 14 [Source:HGNC Symbol;Acc:HGNC:16657]	2743	0.791393	0.51506	Yes
row_44	Nrgn	na	NRGN	neurogranin [Source:HGNC Symbol;Acc:HGNC:8000]	2809	0.78023	0.520825	Yes
row_45	Krt18	na	KRT18	keratin 18 [Source:HGNC Symbol;Acc:HGNC:6430]	2913	0.763908	0.5248	Yes
row_46	Myo1b	na	MYO1B	myosin IB [Source:HGNC Symbol;Acc:HGNC:7596]	3277	0.707682	0.517137	No
row_47	Rgs13	na	RGS13	regulator of G protein signaling 13 [Source:HGNC Symbol;Acc:HGNC:9995]	3292	0.705168	0.524244	No
row_48	Ccdc28b	na	CCDC28B	coiled-coil domain containing 28B [Source:HGNC Symbol;Acc:HGNC:28163]	3512	0.671207	0.522289	No
row_49	Bmx	na	BMX	BMX non-receptor tyrosine kinase [Source:HGNC Symbol;Acc:HGNC:1079]	3766	0.635573	0.518503	No
row_50	Tmem141	na	TMEM141	transmembrane protein 141 [Source:HGNC Symbol;Acc:HGNC:28211]	4304	0.562448	0.501876	No
row_51	Zfp428	na	ZNF428	zinc finger protein 428 [Source:HGNC Symbol;Acc:HGNC:20804]	5525	0.438317	0.454935	No
row_52	Galk1	na	GALK1	galactokinase 1 [Source:HGNC Symbol;Acc:HGNC:4118]	5836	0.407374	0.44624	No
row_53	Lima1	na	LIMA1	LIM domain and actin binding 1 [Source:HGNC Symbol;Acc:HGNC:24636]	6009	0.389623	0.443202	No
row_54	Pla2g16	na	PLAAT3	phospholipase A and acyltransferase 3 [Source:HGNC Symbol;Acc:HGNC:17825]	6598	0.343547	0.422023	No
row_55	Ly6g6d	na	LY6G6D	lymphocyte antigen 6 family member G6D [Source:HGNC Symbol;Acc:HGNC:13935]	6600	0.343288	0.425729	No
row_56	Calm2	na	CALM2	calmodulin 2 [Source:HGNC Symbol;Acc:HGNC:1445]	7088	0.303623	0.408396	No
row_57	Fyb	na	FYB1	FYN binding protein 1 [Source:HGNC Symbol;Acc:HGNC:4036]	7489	0.271775	0.394404	No
row_58	Ffar3	na	FFAR3	free fatty acid receptor 3 [Source:HGNC Symbol;Acc:HGNC:4499]	7571	0.265429	0.393869	No
row_59	Mocs2	na	MOCS2	molybdenum cofactor synthesis 2 [Source:HGNC Symbol;Acc:HGNC:7193]	7666	0.258523	0.392706	No
row_60	Nrep	na	NREP	neuronal regeneration related protein [Source:HGNC Symbol;Acc:HGNC:16834]	7817	0.248068	0.389055	No
row_61	Ildr1	na	ILDR1	immunoglobulin like domain containing receptor 1 [Source:HGNC Symbol;Acc:HGNC:28741]	8014	0.235807	0.38332	No
row_62	Lect2	na	LECT2	leukocyte cell derived chemotaxin 2 [Source:HGNC Symbol;Acc:HGNC:6550]	8683	0.191243	0.357086	No
row_63	Bpgm	na	BPGM	bisphosphoglycerate mutase [Source:HGNC Symbol;Acc:HGNC:1093]	8717	0.188632	0.357746	No
row_64	Csk	na	CSK	C-terminal Src kinase [Source:HGNC Symbol;Acc:HGNC:2444]	9015	0.168227	0.346991	No
row_65	Cd47	na	CD47	CD47 molecule [Source:HGNC Symbol;Acc:HGNC:1682]	9226	0.1526	0.339753	No
row_66	Skap2	na	SKAP2	src kinase associated phosphoprotein 2 [Source:HGNC Symbol;Acc:HGNC:15687]	9238	0.15192	0.340946	No
row_67	2210016L21Rik	na	C12orf43	chromosome 12 open reading frame 43 [Source:HGNC Symbol;Acc:HGNC:25719]	9318	0.146339	0.339194	No
row_68	Ppp3ca	na	PPP3CA	protein phosphatase 3 catalytic subunit alpha [Source:HGNC Symbol;Acc:HGNC:9314]	10728	0.0605504	0.280114	No
row_69	Atp2a3	na	ATP2A3	ATPase sarcoplasmic/endoplasmic reticulum Ca2+ transporting 3 [Source:HGNC Symbol;Acc:HGNC:813]	11180	0.0333756	0.261356	No
row_70	Nebl	na	null	null	11814	-0.0027337	0.234547	No
row_71	Ptpn18	na	PTPN18	protein tyrosine phosphatase non-receptor type 18 [Source:HGNC Symbol;Acc:HGNC:9649]	12326	-0.0344082	0.213257	No
row_72	Rbm38	na	RBM38	RNA binding motif protein 38 [Source:HGNC Symbol;Acc:HGNC:15818]	14791	-0.188934	0.110847	No
row_73	Mlip	na	MLIP	muscular LMNA interacting protein [Source:HGNC Symbol;Acc:HGNC:21355]	15082	-0.207121	0.100813	No
row_74	Snrnp25	na	SNRNP25	small nuclear ribonucleoprotein U11/U12 subunit 25 [Source:HGNC Symbol;Acc:HGNC:14161]	15263	-0.218225	0.0955639	No
row_75	Vdac3	na	VDAC3	voltage dependent anion channel 3 [Source:HGNC Symbol;Acc:HGNC:12674]	15961	-0.264558	0.0689004	No
row_76	Asah1	na	ASAH1	N-acylsphingosine amidohydrolase 1 [Source:HGNC Symbol;Acc:HGNC:735]	16485	-0.302665	0.0500306	No
row_77	Reep5	na	REEP5	receptor accessory protein 5 [Source:HGNC Symbol;Acc:HGNC:30077]	16710	-0.319842	0.0440259	No
row_78	Smpx	na	SMPX	small muscle protein X-linked [Source:HGNC Symbol;Acc:HGNC:11122]	17055	-0.348917	0.0332507	No
row_79	Limd2	na	LIMD2	LIM domain containing 2 [Source:HGNC Symbol;Acc:HGNC:28142]	17089	-0.35096	0.0356842	No
row_80	Plcg2	na	PLCG2	phospholipase C gamma 2 [Source:NCBI gene;Acc:5336]	17425	-0.377597	0.0256039	No
row_81	Arpc5	na	ARPC5	actin related protein 2/3 complex subunit 5 [Source:HGNC Symbol;Acc:HGNC:708]	17826	-0.410482	0.0131267	No
row_82	Bub3	na	BUB3	BUB3 mitotic checkpoint protein [Source:HGNC Symbol;Acc:HGNC:1151]	18615	-0.478101	-0.0150632	No
row_83	Coprs	na	COPRS	coordinator of PRMT5 and differentiation stimulator [Source:HGNC Symbol;Acc:HGNC:28848]	18853	-0.49932	-0.0196591	No
row_84	Gnai2	na	GNAI2	G protein subunit alpha i2 [Source:HGNC Symbol;Acc:HGNC:4385]	19040	-0.518482	-0.0218833	No
row_85	Ndufaf3	na	NDUFAF3	NADH:ubiquinone oxidoreductase complex assembly factor 3 [Source:HGNC Symbol;Acc:HGNC:29918]	19073	-0.521601	-0.0175438	No
row_86	Sec14l1	na	SEC14L1	SEC14 like lipid binding 1 [Source:HGNC Symbol;Acc:HGNC:10698]	19622	-0.58653	-0.0343737	No
row_87	Pea15a	na	PEA15	proliferation and apoptosis adaptor protein 15 [Source:HGNC Symbol;Acc:HGNC:8822]	20027	-0.63372	-0.0445826	No
row_88	Tmem176b	na	TMEM176B	transmembrane protein 176B [Source:HGNC Symbol;Acc:HGNC:29596]	20313	-0.669686	-0.0493531	No
row_89	Malat1	na	null	null	21661	-0.935036	-0.0962545	No
row_90	Tspan6	na	TSPAN6	tetraspanin 6 [Source:HGNC Symbol;Acc:HGNC:11858]	21952	-1.02019	-0.0974093	No
row_91	Ethe1	na	ETHE1	ETHE1 persulfide dioxygenase [Source:HGNC Symbol;Acc:HGNC:23287]	22034	-1.04747	-0.0894047	No
row_92	Tmem176a	na	TMEM176A	transmembrane protein 176A [Source:HGNC Symbol;Acc:HGNC:24930]	22226	-1.12682	-0.0851974	No
row_93	Aldh2	na	ALDH2	aldehyde dehydrogenase 2 family member [Source:HGNC Symbol;Acc:HGNC:404]	22482	-1.25436	-0.082311	No
row_94	Inpp5b	na	INPP5B	inositol polyphosphate-5-phosphatase B [Source:HGNC Symbol;Acc:HGNC:6077]	22817	-1.47384	-0.0803772	No
row_95	Acot7	na	ACOT7	acyl-CoA thioesterase 7 [Source:HGNC Symbol;Acc:HGNC:24157]	22989	-1.62373	-0.0698954	No
row_96	Pygl	na	PYGL	glycogen phosphorylase L [Source:HGNC Symbol;Acc:HGNC:9725]	23260	-1.97697	-0.0597535	No
row_97	Ptgs1	na	PTGS1	prostaglandin-endoperoxide synthase 1 [Source:HGNC Symbol;Acc:HGNC:9604]	23332	-2.09726	-0.0398604	No
row_98	Avil	na	AVIL	advillin [Source:HGNC Symbol;Acc:HGNC:14188]	23443	-2.37237	-0.0186166	No
row_99	Nt5c3	na	NT5C3A	5'-nucleotidase, cytosolic IIIA [Source:HGNC Symbol;Acc:HGNC:17820]	23518	-2.63651	0.00703828	No
